# Supplementary material
Source: publisher site journal article supplement (doi:10.18632/aging.206371)
Supplement: Supplementary file 1 [file aging-v18i1-206371-supplementary-material-SD3.xlsx]

## Sheet: YvsM(M↑)
	Supplementary Table 3. Differentially expressed genes (DEGs) in normal human dermal fibroblasts (NHDFs) (padj < 0.05).
	Gene name	MSTRG ID	Ensembl ID	avg. RPKM		log2FC	padj
				young	middle
1	SLC44A2	MSTRG.34297	ENSG00000129353	41.8544	86.115	1.04087	1.11023e-16
2	CCND2	MSTRG.23623	ENSG00000118971	9.29007	57.2301	2.62288	7.89445e-12
3	IGFBP5	MSTRG.6365	ENSG00000115461	38.8997	436.101	3.4868	8.31781e-10
4	EFNB1	MSTRG.39508	ENSG00000090776	10.9524	22.2649	1.02346	3.65878e-09
5	SERPING1	MSTRG.22060	ENSG00000149131	19.4714	52.724	1.43706	3.56107e-07
6	TXNIP	MSTRG.2266	ENSG00000265972	28.8598	79.8146	1.46756	1.00429e-06
7	CRYAB	MSTRG.23224	ENSG00000109846	24.8634	54.9383	1.14376	1.39657e-06
8	PTGDS	MSTRG.19598	ENSG00000107317	5.41543	59.5339	3.45832	1.30847e-05
9	OLR1	MSTRG.23837	ENSG00000173391	0	3.20097	11.6447	1.8819e-05
10	HSD17B2	MSTRG.30481	ENSG00000086696	7.08685	38.6806	2.44823	2.63175e-05
11	IER2	MSTRG.34503	ENSG00000160888	0	16.3917	14.0008	2.63175e-05
12	OSR2	MSTRG.17316	ENSG00000164920	14.8098	30.1934	1.02763	3.83544e-05
13	F2RL2	MSTRG.11268	ENSG00000164220	4.88146	22.0669	2.17627	4.30686e-05
14	PARP9	MSTRG.8078	ENSG00000138496	0	1.24139	10.2789	5.9415e-05
15	ABCC1	MSTRG.29515	ENSG00000103222	0	1.81171	10.8239	6.85963e-05
16	LDOC1	MSTRG.40040	ENSG00000182195	6.68093	17.4367	1.38387	8.71733e-05
17	TMEM176B	MSTRG.16293	ENSG00000106565	1.6524	26.6832	4.01248	9.89516e-05
18	ALPL	MSTRG.502	ENSG00000162551	5.68944	41.501	2.86657	9.89516e-05
19	CRTAP	MSTRG.7102	ENSG00000170275	33.5977	47.4755	0.49881	9.89516e-05
20	MSC	MSTRG.17072	ENSG00000178860	2.42424	8.14051	1.74717	0.000171168
21	MT-ATP6	MSTRG.19	ENSG00000198899	17.8022	31.2117	0.809997	0.000203269
22	ASCC3	MSTRG.13610	ENSG00000112249	0.0178359	3.59043	7.57493	0.000243214
23	CYB5R1	MSTRG.3309	ENSG00000159348	33.6054	46.4615	0.46733	0.00024921
24	WNT2	MSTRG.15844	ENSG00000105989	0.781035	13.1401	4.07071	0.000252462
25	SNRPN	MSTRG.27621	ENSG00000128739	7.28238	10.9606	0.589781	0.000284566
26	EFEMP1	MSTRG.4671	ENSG00000115380	16.3904	49.4884	1.59418	0.000383867
27	SLC22A17	MSTRG.26447	ENSG00000092096	4.2113	8.45204	1.00486	0.000438477
28	ID3	MSTRG.41399	ENSG00000117318	2.06021	9.00804	2.12788	0.000505329
29	MKX	MSTRG.19971	ENSG00000283060	0	2.47155	11.2718	0.000814006
30	HTR2B	MSTRG.6545	ENSG00000150051	0.0336283	1.67206	5.59439	0.000966368
31	PCDHGA6	MSTRG.11956	ENSG00000135914	2.98034	5.22141	0.808756	0.00106009
32	GALNT5	MSTRG.5716	ENSG00000253731	3.55967	11.5356	1.69599	0.00125744
33	CYB561A3	MSTRG.22152	ENSG00000136542	9.01023	14.5839	0.694677	0.00150482
34	RAMP1	MSTRG.6680	ENSG00000162144	1.15891	8.14235	2.81161	0.00150623
35	MEGF6	MSTRG.200	ENSG00000132329	0.475381	4.99971	3.39195	0.00151314
36	SH3BGRL2	MSTRG.13479	ENSG00000162591	0	1.33232	10.3808	0.00152454
37	SMG5	MSTRG.2695	ENSG00000198478	13.3484	18.6133	0.47964	0.00152454
38	TMEM140	MSTRG.16045	ENSG00000198952	0.64298	1.94925	1.59858	0.00152936
39	MRC2	MSTRG.32414	ENSG00000146859	66.2189	123.806	0.902758	0.00155922
40	HOXB13	MSTRG.32162	ENSG00000011028	0.050627	1.46479	4.82741	0.00161903
41	MGP	MSTRG.23934	ENSG00000159184	0.377558	10.1059	4.73868	0.00200506
42	MXRA8	MSTRG.93	ENSG00000111341	72.1304	117.569	0.704816	0.0020492
43	GABARAPL1	MSTRG.23840	ENSG00000162576	22.0493	44.226	1.00413	0.00209029
44	PRAC1	MSTRG.32160	ENSG00000159182	0.223737	2.75589	3.61673	0.00210795
45	HOXC12	MSTRG.24403	ENSG00000123407	0.126829	2.56434	4.32687	0.00221971
46	ICAM5	MSTRG.34270	ENSG00000105376	3.38469	8.64882	1.35322	0.00250197
47	TMEM130	MSTRG.15476	ENSG00000166448	0.0995351	3.60927	5.16633	0.00253374
48	PIK3IP1	MSTRG.38423	ENSG00000100100	3.30328	12.7045	1.94304	0.00262832
49	LAMP1	MSTRG.26258	ENSG00000185896	140.341	190.312	0.439426	0.00276756
50	SLITRK1	MSTRG.26049	ENSG00000178235	0.112511	1.38652	3.6116	0.00287377
51	QPRT	MSTRG.29754	ENSG00000103485	40.8997	56.0901	0.455647	0.00313091
52	HOXC10	MSTRG.24411	ENSG00000180818	11.0221	15.3619	0.478922	0.003221
53	CERCAM	MSTRG.19309	ENSG00000167123	82.9468	112.102	0.434543	0.00335044
54	C1S	MSTRG.23766	ENSG00000182326	22.0782	77.2784	1.8074	0.00335044
55	C1orf198	MSTRG.3728	ENSG00000119280	20.5018	39.7225	0.954173	0.00346447
56	FAM20A	MSTRG.32564	ENSG00000108950	1.08531	3.32242	1.61324	0.00380197
57	TNFRSF1A	MSTRG.23651	ENSG00000067182	57.1393	75.8161	0.408017	0.004024
58	RSPH10B2	MSTRG.14423	ENSG00000169402	0.0630627	0.53789	3.07243	0.00410918
59	GAS1	MSTRG.18562	ENSG00000180447	6.49573	19.5166	1.58699	0.00415509
60	AGA	MSTRG.10501	ENSG00000038002	10.0432	19.2917	0.94169	0.00465637
61	VSIR	MSTRG.20419	ENSG00000107738	7.65487	18.7441	1.29187	0.00471634
62	CFH	MSTRG.41785	ENSG00000000971	3.53454	10.7257	1.6012	0.00471634
63	FBXL19	MSTRG.29860	ENSG00000099364	6.27246	9.28132	0.565224	0.00476159
64	FAM43A	MSTRG.8846	ENSG00000185112	7.87519	13.4262	0.769593	0.00476159
65	WNT2B	MSTRG.2021	ENSG00000134245	0.597041	5.56576	3.21852	0.00482985
66	CARD16	MSTRG.23147	ENSG00000204397	10.5002	20.6599	0.976346	0.00482985
67	APOL3	MSTRG.38491	ENSG00000128284	1.43531	3.55625	1.3084	0.00494092
68	CORIN	MSTRG.9466	ENSG00000145244	10.7379	42.4729	1.98374	0.0059365
69	MGARP	MSTRG.10240	ENSG00000137463	8.25889	16.7775	1.02242	0.00597717
70	HEXA	MSTRG.28462	ENSG00000213614	22.5316	31.4219	0.479801	0.00623828
71	UBE2L6	MSTRG.22059	ENSG00000156587	33.1419	51.3542	0.631812	0.0071423
72	LGALS3BP	MSTRG.32777	ENSG00000108679	32.5222	72.0837	1.14822	0.0071423
73	TRO	MSTRG.39434	ENSG00000067445	0.351997	2.00947	2.50981	0.0071423
74	TEKT4	MSTRG.40343	ENSG00000163060	0.649846	1.64664	1.34001	0.0071423
75	ERVK-18	MSTRG.20101	ENSG00000267696	1.5813	3.75427	1.24689	0.00727009
76	LUM	MSTRG.24859	ENSG00000139329	74.6817	205.812	1.46249	0.00751193
77	TMEM98	MSTRG.31585	ENSG00000006042	28.7334	39.4031	0.455566	0.00753764
78	DNASE2	MSTRG.34475	ENSG00000105612	18.1592	27.2065	0.583225	0.00753764
79	ATP6AP1	MSTRG.40170	ENSG00000071553	92.4893	118.957	0.363079	0.00765521
80	LRP10	MSTRG.26399	ENSG00000197324	57.9195	84.4578	0.544172	0.00783348
81	TFAP2A	MSTRG.12658	ENSG00000137203	3.46043	7.8682	1.18485	0.00799223
82	MXD4	MSTRG.9083	ENSG00000123933	25.7043	34.505	0.424781	0.00799223
83	CYTL1	MSTRG.9160	ENSG00000170891	1.22773	5.24197	2.09322	0.00799223
84	JAM2	MSTRG.37567	ENSG00000154721	0.0363201	1.79759	5.59077	0.00820909
85	ATP10D	MSTRG.9464	ENSG00000145246	0.0355162	4.96869	7.08848	0.00852383
86	SQSTM1	MSTRG.12468	ENSG00000161011	123.178	194.297	0.657518	0.00859445
87	DMPK	MSTRG.35670	ENSG00000104936	9.53718	13.1307	0.461272	0.00938425
88	TM6SF2	MSTRG.34795	ENSG00000213996	0.451313	2.17414	2.26572	0.00939443
89	TMEM59	MSTRG.1377	ENSG00000116209	14.3795	23.3355	0.69847	0.00948412
90	RCAN2	MSTRG.13239	ENSG00000172348	2.04094	8.20371	2.00651	0.0099204
91	C1R	MSTRG.41703	ENSG00000159403	8.42279	23.4332	1.47607	0.0102076
92	MFAP4	MSTRG.31311	ENSG00000166482	85.2646	190.971	1.16333	0.0103651
93	RBM43	MSTRG.5679	ENSG00000184898	0.170487	2.41595	3.81702	0.010638
94	P2RX4	MSTRG.25330	ENSG00000135124	4.49657	9.26477	1.04276	0.0106987
95	SUCO	MSTRG.2945	ENSG00000094975	0	3.13556	11.615	0.0112323
96	SIX2	MSTRG.4537	ENSG00000170577	7.3944	17.0629	1.20625	0.0113173
97	VNN1	MSTRG.13844	ENSG00000112299	0.0551486	1.27144	4.5022	0.0114184
98	SOX4	MSTRG.12745	ENSG00000124766	1.45072	3.997	1.46151	0.0115914
99	DIRAS2	MSTRG.18607	ENSG00000165023	0.0195762	1.91361	6.53993	0.0115914
100	HLA-E	MSTRG.12889	ENSG00000204592	17.9293	26.7835	0.578996	0.01468
101	IGFBP3	MSTRG.14912	ENSG00000146674	11.8363	167.015	3.81858	0.01468
102	GDE1	MSTRG.29561	ENSG00000006007	30.7261	38.858	0.338737	0.01468
103	EXTL1	MSTRG.634	ENSG00000158008	0.844749	4.52107	2.41868	0.0151773
104	AKR1C2	MSTRG.19745	ENSG00000151632	0.140223	1.10901	2.97453	0.0159703
105	TSPAN3	MSTRG.28600	ENSG00000172348	13.3709	21.4243	0.680111	0.0159703
106	FKBP9	MSTRG.14960	ENSG00000122642	0.498681	2.64758	2.40614	0.0175477
107	PBXIP1	MSTRG.2594	ENSG00000163346	11.3398	26.6763	1.23409	0.018286
108	CEBPD	MSTRG.16870	ENSG00000221869	15.2592	22.8734	0.583962	0.0199142
109	SULF1	MSTRG.17056	ENSG00000137573	0	7.44172	12.8616	0.0208956
110	SGK3	MSTRG.17023	ENSG00000104205	0.0429302	0.54541	3.6367	0.0210818
111	GAA	gene-GAA-2	ENSG00000171298	3.05153	6.09529	0.997927	0.0210818
112	CTF1	MSTRG.29858	ENSG00000291507	5.67353	11.2689	0.989895	0.0219881
113	CUL7	MSTRG.13156	ENSG00000150281	6.09429	10.666	0.807388	0.022351
114	SCARB2	MSTRG.9698	ENSG00000044090	25.9673	37.9228	0.546354	0.022351
115	STING1	gene-STING1	ENSG00000138760	6.69467	13.5522	1.01733	0.022351
116	SYPL2	MSTRG.1923	ENSG00000184584	1.29578	13.1078	3.33752	0.0223614
117	PNRC1	MSTRG.13558	ENSG00000288243	4.38239	9.90089	1.17566	0.0229265
118	SMO	MSTRG.15943	ENSG00000143028	0.200387	3.38354	4.07092	0.0231141
119	B4GAT1	MSTRG.22528	ENSG00000146278	10.4388	16.6148	0.670469	0.0231141
120	METTL25B	MSTRG.2719	ENSG00000128602	0.797092	2.32442	1.54287	0.0231141
121	SAT1	MSTRG.39164	ENSG00000174684	11.6306	24.7596	1.08999	0.0236988
122	RGCC	MSTRG.25796	ENSG00000143303	75.2431	126.045	0.744306	0.0240416
123	-	gene-HLA-E-2	ENSG00000130066	15.1913	22.2435	0.55011	0.0240416
124	HSPB7	MSTRG.404	ENSG00000102760	2.71657	6.30615	1.21467	0.024253
125	P4HA3	MSTRG.22817	ENSG00000173641	1.73535	5.82024	1.74527	0.0243004
126	ARMC9	MSTRG.6546	ENSG00000149380	4.1742	8.73633	1.06535	0.0243106
127	NIBAN1	MSTRG.3157	ENSG00000135931	0	4.96081	12.2767	0.0259092
128	-	MSTRG.16290	ENSG00000135842	0.825385	3.07875	1.89793	0.0259359
129	SLC9A9	MSTRG.8387	ENSG00000181804	0	0.604106	9.24104	0.0259359
130	SEZ6L2	MSTRG.29766	ENSG00000174938	7.40494	13.3249	0.847475	0.0272147
131	EEF1A1	MSTRG.10715	ENSG00000156508	11.8348	37.2636	1.65465	0.0272363
132	FZD4	MSTRG.23001	ENSG00000174804	0.065144	0.717838	3.44199	0.0282295
133	LTBP3	MSTRG.22426	ENSG00000168056	15.0048	23.4818	0.646086	0.0287348
134	GJA5	MSTRG.2304	ENSG00000265107	0.18175	3.78064	4.37107	0.0287348
135	MAP3K7CL	MSTRG.41976	ENSG00000156265	2.45097	4.70839	0.941599	0.0287348
136	DDOST	MSTRG.480	ENSG00000244038	194.486	241.057	0.309712	0.0287592
137	IL20RB	MSTRG.8301	ENSG00000174564	2.07972	4.92879	1.24444	0.0297065
138	MARVELD1	MSTRG.20828	ENSG00000155254	71.7592	92.4598	0.365657	0.0308492
139	PLBD1	MSTRG.23913	ENSG00000121316	0.225681	2.4509	3.43517	0.0317665
140	ANGPTL2	MSTRG.19186	ENSG00000136859	4.84923	8.76217	0.8534	0.0318493
141	SLC6A8	MSTRG.40113	ENSG00000130821	8.85258	15.476	0.805792	0.0318493
142	ARHGEF25	MSTRG.24590	ENSG00000240771	7.41714	13.1773	0.829031	0.0319075
143	ID1	MSTRG.36789	ENSG00000125968	2.84351	9.76886	1.78016	0.0331397
144	RPN2	MSTRG.36980	ENSG00000118705	85.265	101.863	0.256602	0.0331397
145	ANTXR1	MSTRG.4833	ENSG00000169604	8.10343	15.8508	0.967867	0.0340331
146	GNPDA1	MSTRG.11972	ENSG00000113552	12.4996	23.2626	0.896077	0.0345507
147	NCSTN	MSTRG.2794	ENSG00000162736	41.5134	60.3733	0.540324	0.0345507
148	GDPD5	MSTRG.22854	ENSG00000158555	0.00153666	0.373485	7.20583	0.0346994
149	SH3PXD2B	MSTRG.12290	ENSG00000174705	0	3.69323	11.8511	0.0359342
150	H2AC6	MSTRG.12782	ENSG00000180573	12.6641	21.5163	0.764634	0.036341
151	CREG1	MSTRG.2887	ENSG00000143162	7.80431	15.8661	1.02351	0.036341
152	TPR	MSTRG.3169	ENSG00000047410	0	4.02814	11.9763	0.036341
153	PIGT	MSTRG.37101	ENSG00000124155	69.256	85.0824	0.296917	0.036341
154	KCNC4	MSTRG.1957	ENSG00000116396	1.60689	3.43211	1.09435	0.0364629
155	AKR1C3	MSTRG.19749	ENSG00000196139	0.0042435	0.913573	7.44643	0.0392608
156	GPR137B	MSTRG.3820	ENSG00000077585	3.68189	9.05866	1.29862	0.0392608
157	TSPYL2	MSTRG.39396	ENSG00000184205	19.5838	32.8809	0.74756	0.0396703
158	LRATD1	MSTRG.4093	ENSG00000162981	2.29108	3.78328	0.723359	0.0407244
159	EREG	MSTRG.9677	ENSG00000124882	0.185539	3.22914	4.11405	0.0424669
160	PDK2	MSTRG.32215	ENSG00000005882	5.57636	8.48144	0.604898	0.04321
161	PRSS12	MSTRG.10063	ENSG00000164099	4.89202	11.8453	1.27564	0.0464019
162	TMEM198	MSTRG.24466	ENSG00000188760	0.948903	3.09886	1.70635	0.0464019
163	CERS4	MSTRG.34143	ENSG00000090661	1.35826	2.42853	0.837858	0.0470972
164	NLGN2	gene-NLGN2	ENSG00000169992	6.13328	10.3448	0.754084	0.0473104
165	IGFBP7	MSTRG.9596	ENSG00000163453	74.7549	167.69	1.16555	0.0473134
166	GSTA4	MSTRG.13285	ENSG00000170899	7.86122	12.6174	0.682518	0.0478314
	Gene expression levels were quantified using StringTie and are presented as Reads Per Kilobase of transcript per Million mapped reads (RPKM) values (mean, n = 7 per group). Log2 fold-change values were calculated after adding a pseudo-count of 0.001 to all RPKM values. DEGs were filtered using padj < 0.05. No log2FC threshold was applied. For transcripts without an Ensembl Gene ID, the “Ensembl I…
	A, B: DEGs between young and middle NHDFs. A: upregulated in the middle group; B: downregulated in the middle group.
	C, D: DEGs between middle and old NHDFs. C: upregulated in the old group; D: downregulated in the old group.
	E, F: DEGs between young and old NHDFs. E: upregulated in the old group; F: downregulated in the old group.

## Sheet: YvsM(M↓)
	Supplementary Table S3B.
	Differentially expressed genes (DEGs) in normal human dermal fibroblasts (NHDFs) (padj < 0.05).
	Gene name	MSTRG ID	Ensembl ID	avg. RPKM		log2FC	padj
				young	middle
1	RPS3A	MSTRG.15455	ENSG00000145425	63.0404	0	-15.944	4.15539e-12
2	UBE2C	MSTRG.37116	ENSG00000175063	23.8239	7.62817	-1.64287	4.63088e-10
3	CDC20	MSTRG.1132	ENSG00000117399	18.9344	6.20708	-1.60887	3.26932e-08
4	PLAU	MSTRG.20496	ENSG00000122861	106.241	35.0332	-1.60051	7.52909e-08
5	RANBP1	MSTRG.38075	ENSG00000099901	19.7307	11.3108	-0.802685	7.52909e-08
6	BIRC5	MSTRG.32752	ENSG00000089685	17.7267	6.60109	-1.42501	4.99137e-06
7	FABP5	MSTRG.17157	ENSG00000164687	14.1419	4.59182	-1.62263	7.92505e-06
8	SFRP2	MSTRG.10369	ENSG00000145423	10.6519	0.124088	-6.41215	2.35007e-05
9	MT2A	MSTRG.30053	ENSG00000125148	822.85	368.459	-1.15912	2.63175e-05
10	LY6K	MSTRG.17661	ENSG00000160886	6.93165	1.35151	-2.35777	3.50589e-05
11	RRM2	MSTRG.4053	ENSG00000171848	14.4419	5.36665	-1.428	0.000129745
12	CRABP2	MSTRG.2710	ENSG00000143320	223.003	75.749	-1.55775	0.000171168
13	TRB	MSTRG.40892	HGNC:12155	4.78169	0.775723	-2.62235	0.000203269
14	TK1	MSTRG.32749	ENSG00000167900	26.9316	11.4547	-1.23329	0.000278345
15	CKS1B	MSTRG.2602	ENSG00000173207	24.5161	13.6953	-0.840007	0.000296716
16	NOP16	MSTRG.12357	ENSG00000048162	20.0458	11.0555	-0.858481	0.000425393
17	CCT7	MSTRG.4902	ENSG00000135624	114.088	81.7313	-0.481178	0.00048131
18	EIF4A1	MSTRG.30993	ENSG00000161960	438.533	330.974	-0.405967	0.000505329
19	NPTX2	MSTRG.15475	ENSG00000106236	7.63992	0	-12.8995	0.000565826
20	CRIP2	MSTRG.27602	ENSG00000182809	9.23001	3.7889	-1.28433	0.00062177
21	PTTG1	MSTRG.12244	ENSG00000164611	38.915	15.9279	-1.28872	0.000814006
22	ALYREF	MSTRG.32886	ENSG00000183684	36.1458	22.7193	-0.669884	0.00209029
23	PLAUR	MSTRG.35514	ENSG00000011422	21.7115	12.941	-0.746469	0.00209029
24	HNRNPM	MSTRG.34162	ENSG00000099783	55.776	38.0899	-0.550225	0.00210795
25	PNP	MSTRG.26316	ENSG00000198805	13.0278	6.55504	-0.99081	0.00225084
26	SNRPA1	MSTRG.28997	ENSG00000131876	20.3372	11.8473	-0.779515	0.00231867
27	CLIC1	MSTRG.40721	ENSG00000213719	57.2225	41.0392	-0.479571	0.00231867
28	PLAC9	MSTRG.20582	ENSG00000189129	29.2044	9.39634	-1.63591	0.00232397
29	COTL1	MSTRG.30520	ENSG00000103187	303.174	188.874	-0.682716	0.00356701
30	PIMREG	MSTRG.30952	ENSG00000129195	3.18422	0.943806	-1.7533	0.00358087
31	SMS	MSTRG.39158	ENSG00000102172	21.2747	11.3893	-0.901407	0.00366065
32	TUBB	MSTRG.19645	ENSG00000196230	316.788	174.668	-0.8589	0.00369714
33	TGFBI	MSTRG.11828	ENSG00000120708	53.2354	28.8375	-0.884415	0.00370087
34	PKMYT1	MSTRG.29295	ENSG00000127564	5.1664	1.91195	-1.43364	0.00370087
35	GINS2	MSTRG.30546	ENSG00000131153	5.13834	1.80524	-1.50859	0.00370087
36	HBA1	MSTRG.29045	ENSG00000206172	2.51397	0.416041	-2.59228	0.00386822
37	HBA2		ENSG00000188536
38	STIP1	MSTRG.22297	ENSG00000168439	43.8917	30.8604	-0.508176	0.004024
39	UBE2S	MSTRG.31164	ENSG00000108106	13.9619	5.95899	-1.22822	0.0047778
40	TFPI2	MSTRG.15423	ENSG00000105825	11.8207	1.95493	-2.59551	0.00548461
41	CCNB1	MSTRG.11149	ENSG00000134057	23.5544	11.0295	-1.09456	0.00573113
42	TUBB2A	MSTRG.12580	ENSG00000137267	48.6556	31.8087	-0.613169	0.00588305
43	TUBB2B		ENSG00000137285
44	RNASEH2A	MSTRG.34470	ENSG00000104889	23.0568	12.0254	-0.939053	0.00597717
45	TOMM40	MSTRG.35583	ENSG00000130204	16.0582	10.0475	-0.676423	0.00607203
46	DTYMK	MSTRG.6799	ENSG00000168393	33.9056	19.4571	-0.801197	0.00608411
47	TYMS	MSTRG.33005	ENSG00000176890	22.6409	12.1216	-0.901293	0.00640641
48	MCM7	MSTRG.15538	ENSG00000166508	33.4777	15.586	-1.1029	0.00753764
49	ANP32B	MSTRG.18782	ENSG00000136938	69.6362	47.8715	-0.540663	0.00831446
50	NRGN	MSTRG.23439	ENSG00000154146	10.6083	0.699281	-3.92125	0.00852383
51	KRT18	MSTRG.24358	ENSG00000111057	15.1549	6.87596	-1.14004	0.00938425
52	PTGS1	MSTRG.19117	ENSG00000095303	28.611	4.36253	-2.71305	0.00939443
53	DCTPP1	MSTRG.29822	ENSG00000179958	20.2865	13.2313	-0.616531	0.00939443
54	DHDDS	MSTRG.655	ENSG00000117682	22.3949	17.2287	-0.378333	0.010994
55	HMGB2	MSTRG.10461	ENSG00000164104	14.3263	5.80557	-1.30301	0.0118786
56	FEN1	MSTRG.22172	ENSG00000168496	19.5046	10.543	-0.887459	0.0120568
57	C11orf68	MSTRG.22472	ENSG00000175573	59.9447	41.2621	-0.538805	0.0130999
58	LMNB2	MSTRG.33811	ENSG00000176619	18.6507	12.8282	-0.539876	0.0141139
59	PBDC1	MSTRG.39600	ENSG00000102390	16.8224	8.98588	-0.904574	0.0155932
60	CHCHD2	MSTRG.14985	ENSG00000106153	185.004	136.392	-0.439789	0.0157398
61	INMT	MSTRG.14688	ENSG00000241644	4.4783	1.07804	-2.05352	0.0167178
62	RPS21	MSTRG.37364	ENSG00000171858	380.112	255.737	-0.571762	0.0167926
63	EIF5A	gene-EIF5A	ENSG00000132507	66.3041	46.0256	-0.526654	0.0168539
64	ADRB2	MSTRG.12043	ENSG00000169252	2.22371	0.414583	-2.42041	0.0182515
65	STXBP6	MSTRG.26496	ENSG00000168952	2.21544	0.459751	-2.26618	0.0183259
66	ITGA5	MSTRG.24447	ENSG00000161638	118.754	94.2499	-0.333409	0.0184539
67	NME2	MSTRG.32273	ENSG00000243678	208.52	143.245	-0.541699	0.0193854
68	PA2G4	MSTRG.24486	ENSG00000170515	61.1087	43.8626	-0.478378	0.0196507
69	NDUFAF2	MSTRG.11050	ENSG00000164182	19.8277	11.8056	-0.748	0.0196568
70	SUMO2	MSTRG.32640	ENSG00000188612	32.6779	23.5437	-0.472954	0.0221259
71	TUBA1C	MSTRG.24231	ENSG00000167553	280.133	168.506	-0.73331	0.022351
72	ILK	MSTRG.21558	ENSG00000166333	120.38	85.4199	-0.49495	0.0236988
73	SNRPB	MSTRG.36471	ENSG00000125835	137.642	93.7273	-0.554371	0.0249304
74	FST	MSTRG.10966	ENSG00000134363	12.8654	3.53039	-1.8653	0.0282901
75	CCDC137	MSTRG.32863	ENSG00000185298	12.2804	7.21579	-0.767042	0.0284282
76	TMSB15B	MSTRG.39721	ENSG00000158427	2.22744	0.388072	-2.51792	0.0284697
77	TAAR1	MSTRG.37493	ENSG00000146399	38.9926	3.92494	-3.31213	0.0287348
78	RPS18	MSTRG.7910	ENSG00000231500	131.376	92.8411	-0.500864	0.0287348
79	GTF3C6	MSTRG.13680	ENSG00000155115	51.5767	36.8458	-0.485209	0.0291795
80	BOP1	MSTRG.17769	ENSG00000261236	27.8426	14.7397	-0.917538	0.0292905
81	CENPM	MSTRG.38746	ENSG00000100162	3.68681	1.69392	-1.12154	0.0294749
82	MCM5	MSTRG.38482	ENSG00000100297	8.82187	4.49494	-0.972627	0.0319075
83	CXCL8	MSTRG.9659	ENSG00000169429	8.32834	2.13304	-1.96462	0.032426
84	EBNA1BP2	MSTRG.1125	ENSG00000117395	39.4856	19.472	-1.01988	0.0325476
85	RPL38	MSTRG.32612	ENSG00000172809	140.804	95.3439	-0.562466	0.0329103
86	NOC2L	MSTRG.37	ENSG00000188976	34.2872	19.936	-0.782266	0.0338529
87	PRELID1	MSTRG.12382	ENSG00000169230	139.794	105.164	-0.410668	0.0340331
88	S100A3	MSTRG.2529	ENSG00000188015	4.21707	1.43341	-1.55612	0.0340331
89	NES	MSTRG.2706	ENSG00000132688	124.272	71.9506	-0.788418	0.0346994
90	PLK1	MSTRG.29629	ENSG00000166851	12.8499	4.50495	-1.51197	0.0346994
91	XRCC6	MSTRG.38734	ENSG00000196419	117.657	89.0389	-0.402071	0.0346994
92	FOXD1	MSTRG.11219	ENSG00000251493	2.55157	1.08833	-1.22851	0.0370168
93	ACOT7	MSTRG.229	ENSG00000097021	34.2711	23.2602	-0.559109	0.0384554
94	NCAPH2	MSTRG.38972	ENSG00000025770	9.07018	4.83524	-0.907406	0.0407244
95	APOBEC3B	MSTRG.38642	ENSG00000179750	5.74282	2.23737	-1.35956	0.0426713
96	ENO1	MSTRG.267	ENSG00000074800	347.819	280.244	-0.311655	0.0442313
97	NANS	MSTRG.18787	ENSG00000095380	41.5073	27.8573	-0.57529	0.0455565
98	SNRPC	MSTRG.12991	ENSG00000124562	105.476	77.2578	-0.449157	0.0473104
99	BCL2L12	MSTRG.35928	ENSG00000126453	11.9851	6.86759	-0.803279	0.0473104
100	CDKN3	MSTRG.26768	ENSG00000100526	5.30621	2.21831	-1.25785	0.0493

## Sheet: MvsO(O↑)
	Supplementary Table S3C.
	Differentially expressed genes (DEGs) in normal human dermal fibroblasts (NHDFs) (padj < 0.05).
	Gene name	MSTRG ID	Ensembl ID	avg. RPKM		log2FC	padj
				middle	old
1	SOD3	MSTRG.9359	ENSG00000109610	23.2352	707.834	4.92896	3.2522e-39
2	BMP4	MSTRG.26764	ENSG00000125378	6.65775	48.6238	2.86837	2.85161e-23
3	TFPI2	MSTRG.15423	ENSG00000105825	1.95493	60.7243	4.95637	1.23066e-22
4	BST2	MSTRG.34668	ENSG00000130303	2.3244	290.634	6.96559	1.77051e-22
5	MMP3	MSTRG.23129	ENSG00000149968	11.3652	234.724	4.36815	2.70881e-20
6	FABP4	MSTRG.17160	ENSG00000170323	1.38592	22.012	3.9884	6.76396e-20
7	CKB	MSTRG.27504	ENSG00000166165	4.4649	33.702	2.91585	2.91464e-16
8	APCDD1	MSTRG.33086	ENSG00000154856	18.0819	190.962	3.40059	2.85377e-15
9	ALDH3A1	MSTRG.31322	ENSG00000108602	1.0992	16.0119	3.8634	3.20491e-14
10	SUGCT	MSTRG.14800	ENSG00000175600	0.296155	1.37964	2.21605	1.0275e-12
11	IFI6	MSTRG.718	ENSG00000126709	43.1224	1030.94	4.57935	1.81745e-12
12	COLEC10	MSTRG.17484	ENSG00000184374	0.0842996	9.52827	6.80368	9.73843e-12
13	KCNMA1	MSTRG.20531	ENSG00000156113	0.62871	3.91461	2.63648	4.00435e-11
14	-	MSTRG.23009	UniProt: O00370	22.4153	60.8624	1.44103	4.68057e-11
15	FABP5	MSTRG.17157	ENSG00000164687	4.59182	20.1401	2.13269	1.25459e-10
16	KPRP	MSTRG.2518	ENSG00000203786	1.27532	87.7522	6.10339	1.89209e-10
17	SERPINE2	MSTRG.6484	ENSG00000135919	145.605	1038.07	2.83376	2.25921e-10
18	INSC	MSTRG.21710	ENSG00000188487	0	3.51985	11.7817	6.80811e-10
19	SNX18	MSTRG.40434	ENSG00000178996	0.5629	7.81469	3.79286	1.49838e-09
20	CTSH	MSTRG.28644	ENSG00000103811	2.24778	13.1934	2.55271	2.68278e-09
21	PRELP	MSTRG.3320	ENSG00000188783	1.70476	13.1481	2.94648	2.68278e-09
22	HOXD4	MSTRG.5912	ENSG00000170166	0.489264	2.55745	2.38364	2.84271e-09
23	IFIT1	MSTRG.20682	ENSG00000185745	1.22983	41.9153	5.08981	3.49759e-09
24	FMOD	MSTRG.3319	ENSG00000122176	9.676	62.234	2.6851	3.49759e-09
25	UBE2C	MSTRG.37116	ENSG00000175063	7.62817	18.986	1.31541	3.79458e-09
26	CEND1	MSTRG.21389	ENSG00000184524	0.28442	6.24947	4.45281	5.7595e-09
27	OAS2	MSTRG.25186	ENSG00000111335	0.0505809	20.3885	8.62677	9.00823e-09
28	FST	MSTRG.10966	ENSG00000134363	3.53039	15.8923	2.17011	1.64187e-08
29	IL13RA2	MSTRG.39852	ENSG00000123496	0	16.7158	14.029	3.03535e-08
30	PTGER1	MSTRG.34551	ENSG00000160951	0.659713	9.55169	3.85381	3.08304e-08
31	RAB38	MSTRG.23006	ENSG00000123892	0.1926	1.3441	2.79656	3.89176e-08
32	IFIT3	MSTRG.20680	ENSG00000119917	4.42462	66.5824	3.91121	4.94155e-08
33	CXCL8	MSTRG.9659	ENSG00000169429	2.13304	18.9819	3.15304	4.94155e-08
34	GPC6	MSTRG.26068	ENSG00000183098	0	2.30765	11.1728	5.49897e-08
35	EPHX2	MSTRG.16655	ENSG00000120915	0	1.34923	10.399	7.4722e-08
36	LSP1	MSTRG.5099	ENSG00000130592	2.218	6.07321	1.45279	7.4722e-08
37	TYMS	MSTRG.33005	ENSG00000176890	12.1216	30.2982	1.32157	1.16624e-07
38	ISM1	MSTRG.36626	ENSG00000101230	0	4.36221	12.0912	1.4217e-07
39	PLPP3	MSTRG.1421	ENSG00000162407	4.15841	40.6814	3.28995	1.44099e-07
40	FAM89A	MSTRG.3734	ENSG00000182118	2.02262	12.7324	2.6536	2.01419e-07
41	GNG11	MSTRG.15424	ENSG00000127920	17.5886	91.016	2.37141	2.70972e-07
42	MAMDC2	MSTRG.18430	ENSG00000165072	0.415811	8.34151	4.32301	2.84374e-07
43	ISG15	MSTRG.52	ENSG00000187608	15.9506	212.801	3.73774	2.85548e-07
44	CASP1	MSTRG.23146	ENSG00000137752	6.99078	34.4148	2.29934	3.95803e-07
45	UBE2T	MSTRG.3290	ENSG00000077152	5.02487	13.0103	1.37232	4.52664e-07
46	EMB	MSTRG.10948	ENSG00000170571	0	4.99335	12.2861	4.67074e-07
47	THBD	MSTRG.36691	ENSG00000178726	0.0395571	3.15212	6.28068	4.72069e-07
48	CCDC184	MSTRG.24182	ENSG00000177875	0.572356	5.81024	3.34134	4.80823e-07
49	PPP5D1P	MSTRG.5927	ENSG00000230510	3.99117	11.3158	1.50322	5.40289e-07
50	LPCAT2	MSTRG.30042	ENSG00000087253	0.0845047	3.74244	5.45222	6.40862e-07
51	PTGS1	MSTRG.19117	ENSG00000095303	4.36253	49.3848	3.50053	8.57769e-07
52	COLEC12	MSTRG.32992	ENSG00000158270	0	3.76892	11.8803	9.82064e-07
53	SLC47A1	MSTRG.31317	ENSG00000142494	0	3.65217	11.8349	1.13405e-06
54	PARD6G	MSTRG.33585	ENSG00000178184	0.733605	3.51431	2.25861	2.23329e-06
55	CGREF1	MSTRG.4255	ENSG00000138028	0.0721779	1.95622	4.74125	2.65855e-06
56	GPAT2	MSTRG.5146	ENSG00000186281	1.15577	5.13783	2.15134	2.79994e-06
57	CCNB1	MSTRG.11149	ENSG00000134057	11.0295	26.8652	1.28429	3.84386e-06
58	STMN3	MSTRG.37413	ENSG00000197457	5.37352	16.2755	1.59858	3.86108e-06
59	RAB27B	MSTRG.33354	ENSG00000041353	0.0302885	5.21976	7.38248	4.15576e-06
60	BMP2	MSTRG.36601	ENSG00000125845	1.55776	9.36663	2.58728	5.11212e-06
61	CCL5	gene-CCL5	ENSG00000271503	0.213658	4.90159	4.51343	5.36183e-06
62	PCNA	MSTRG.36576	ENSG00000132646	28.3047	58.468	1.04658	8.17529e-06
63	CKS1B	MSTRG.2602	ENSG00000173207	13.6953	29.9205	1.1274	8.40021e-06
64	STC2	MSTRG.12318	ENSG00000113739	38.3526	117.079	1.61007	1.04543e-05
65	NETO1	MSTRG.33483	ENSG00000166342	0	0.84969	9.73249	1.04543e-05
66	EBF4	MSTRG.36482	ENSG00000088881	0.0774722	3.63865	5.53547	1.16523e-05
67	STOM	MSTRG.19104	ENSG00000148175	20.1302	73.9117	1.87639	1.21328e-05
68	LAPTM5	MSTRG.768	ENSG00000162511	0	1.79023	10.8067	1.28772e-05
69	C1QTNF2	MSTRG.12239	ENSG00000145861	0.318518	3.32684	3.38062	1.50423e-05
70	CXCL11	MSTRG.9696	ENSG00000169248	0.142071	6.40406	5.48441	1.50423e-05
71	RTN4RL1	MSTRG.30806	ENSG00000185924	0	3.21998	11.6533	1.66778e-05
72	CMPK2	MSTRG.4017	ENSG00000134326	0	6.12148	12.5799	1.73925e-05
73	MRGPRF	MSTRG.22683	ENSG00000172935	48.0694	90.4043	0.911259	1.85393e-05
74	TSPAN15	MSTRG.20380	ENSG00000099282	0.532767	2.58608	2.27704	2.345e-05
75	PBK	MSTRG.16666	ENSG00000168078	1.36274	7.9573	2.54489	2.51066e-05
76	SERPINB2	MSTRG.33428	ENSG00000197632	0.322917	10.9395	5.07792	2.62237e-05
77	GREM2	MSTRG.3844	ENSG00000180875	0.1946	5.65559	4.85395	2.62237e-05
78	PLAU	MSTRG.20496	ENSG00000122861	35.0332	75.0833	1.09975	2.62995e-05
79	SYT17	MSTRG.29556	ENSG00000103528	0.0398955	1.60159	5.29231	2.82677e-05
80	DHRS7	MSTRG.26849	ENSG00000100612	29.2717	58.3819	0.995991	2.97699e-05
81	RSAD2	MSTRG.4018	ENSG00000134321	0	6.61937	12.6927	3.0076e-05
82	GPR37	MSTRG.15879	ENSG00000170775	0.263673	2.96658	3.48701	3.42995e-05
83	MALL	MSTRG.5329	ENSG00000144063	0.336065	2.60778	2.95228	3.91661e-05
84	SLITRK1	MSTRG.26049	ENSG00000178235	1.38652	5.19218	1.90411	4.06696e-05
85	IGFBP3	MSTRG.14912	ENSG00000146674	167.015	217.537	0.381281	4.23893e-05
86	RFX8	MSTRG.5262	ENSG00000196460	0.0177841	2.91778	7.27971	5.081e-05
87	SECTM1	MSTRG.32950	ENSG00000141574	5.77809	34.1353	2.56239	5.43119e-05
88	PTN	MSTRG.16083	ENSG00000105894	7.51779	29.6982	1.98185	5.80385e-05
89	TMEM204	MSTRG.29172	ENSG00000131634	3.20788	10.5722	1.72028	6.08684e-05
90	PDE1C	MSTRG.14695	ENSG00000154678	0.0398435	0.579709	3.82964	6.29549e-05
91	NAALADL1	MSTRG.22362	ENSG00000168060	1.18264	4.32198	1.86879	6.69895e-05
92	CCNB2	MSTRG.28143	ENSG00000157456	5.3611	12.4114	1.21092	7.17118e-05
93	REC8	MSTRG.26471	ENSG00000100918	0.816796	3.9659	2.2782	7.44814e-05
94	TBC1D2	MSTRG.18794	ENSG00000095383	4.97918	10.3954	1.06181	8.23697e-05
95	E2F7	MSTRG.24783	ENSG00000165891	0.148056	4.47745	4.90907	9.07635e-05
96	CDK1	MSTRG.20271	ENSG00000170312	1.55599	5.42284	1.80055	9.43525e-05
97	HERC5	MSTRG.9854	ENSG00000138646	0	5.62467	12.4578	9.43525e-05
98	HAUS4	MSTRG.26408	ENSG00000092036	3.69963	6.69168	0.854811	0.000120405
99	TNFRSF10C	MSTRG.16599	ENSG00000173535	1.61099	7.36296	2.19164	0.000130787
100	RRM2	MSTRG.4053	ENSG00000171848	5.36665	13.0383	1.28051	0.000141466
101	OAS1	MSTRG.25184	ENSG00000089127	0.0699244	28.2599	8.63831	0.000141982
102	HMGB2	MSTRG.10461	ENSG00000164104	5.80557	15.5169	1.41818	0.000157693
103	PDE2A	MSTRG.22778	ENSG00000186642	0.293724	2.19839	2.89967	0.000180257
104	PROCR	MSTRG.36906	ENSG00000101000	11.5036	22.5555	0.97133	0.000180257
105	EPDR1	MSTRG.14778	ENSG00000086289	2.02001	15.3957	2.92947	0.000210819
106	IFI44	MSTRG.1626	ENSG00000137965	0.0705888	4.21217	5.87903	0.00021718
107	RPP25	MSTRG.28523	ENSG00000178718	3.34131	8.90534	1.41399	0.000227125
108	SFRP2	MSTRG.10369	ENSG00000145423	0.124088	2.55872	4.35497	0.000234539
109	GGTA1	MSTRG.19107	ENSG00000204136	0.0114358	0.675854	5.76627	0.00023622
110	APBB1IP	MSTRG.19947	ENSG00000077420	0	4.00765	11.9689	0.000236543
111	DUSP15	MSTRG.36800	ENSG00000149599	0.0333471	0.599646	4.12825	0.000238965
112	IFI27	MSTRG.27291	ENSG00000165949	1.20541	32.9005	4.76936	0.000256965
113	LRATD1	MSTRG.4093	ENSG00000162981	3.78328	11.17	1.56167	0.000256965
114	BIRC5	MSTRG.32752	ENSG00000089685	6.60109	14.4302	1.1282	0.00028442
115	ANXA1	MSTRG.18462	ENSG00000135046	88.2338	161.787	0.874685	0.000289722
116	CIART	MSTRG.2390	ENSG00000159208	1.96114	5.93215	1.59637	0.000289722
117	GPNMB	MSTRG.14548	ENSG00000136235	74.4091	188.443	1.34057	0.000293768
118	OLFML1	MSTRG.21582	ENSG00000183801	1.05067	4.10036	1.96343	0.000299178
119	HGF	MSTRG.15333	ENSG00000019991	1.98141	13.5979	2.77816	0.000299335
120	GPR68	MSTRG.27258	ENSG00000119714	2.17148	4.86186	1.16246	0.000300662
121	PRC1	MSTRG.28874	ENSG00000198901	5.52054	13.493	1.28918	0.000307701
122	LPL	MSTRG.16537	ENSG00000175445	0	4.23071	12.047	0.000316732
123	FZD8	MSTRG.20074	ENSG00000177283	4.22146	8.45958	1.00267	0.000316732
124	LINC00269	MSTRG.10752	ENSG00000215162	0.00548162	0.810462	6.96803	0.000328248
125	OASL	MSTRG.25327	ENSG00000135114	0	3.06504	11.5822	0.000351182
126	SPRY2	MSTRG.26036	ENSG00000136158	5.77907	22.586	1.96633	0.000371208
127	PLXDC2	MSTRG.19905	ENSG00000120594	2.12801	3.97607	0.901521	0.000372244
128	FOXQ1	MSTRG.12535	ENSG00000164379	0.469855	4.07559	3.11401	0.000419466
129	DDX10	MSTRG.23196	ENSG00000178105	1.73567	7.46035	2.10312	0.000432192
130	TXNIP	MSTRG.2266	ENSG00000265972	79.8146	239.873	1.58754	0.000435754
131	IMPA2	MSTRG.33105	ENSG00000141401	6.52267	13.8165	1.08274	0.000472318
132	HP1BP3	MSTRG.489	ENSG00000127483	5.23034	9.9988	0.934717	0.000503175
133	ORC6	MSTRG.29947	ENSG00000091651	0.684585	3.9385	2.5226	0.000509606
134	MMP1	MSTRG.23128	ENSG00000196611	49.6495	307.285	2.6297	0.000513129
135	CAVIN2	MSTRG.6121	ENSG00000168497	2.34561	8.66972	1.88557	0.000514734
136	NANOGNB	MSTRG.30772	ENSG00000205857	2.16678	6.04286	1.47925	0.000605017
137	ACKR3	MSTRG.6627	ENSG00000144476	3.00209	15.9713	2.41106	0.000605017
138	KCNE4	MSTRG.6476	ENSG00000152049	1.88528	9.59739	2.34725	0.000616176
139	CD36	MSTRG.15327	ENSG00000135218	0.0433605	1.41023	4.99153	0.00064807
140	USP18	MSTRG.37996	ENSG00000184979	0.228383	14.0735	5.93919	0.00064807
141	CDKN2C	MSTRG.1297	ENSG00000123080	2.55117	5.54539	1.11983	0.000761504
142	PDE6B	MSTRG.8988	ENSG00000133256	0	1.1498	10.1684	0.000793666
143	PLAUR	MSTRG.35514	ENSG00000011422	12.941	25.669	0.988026	0.000809729
144	CRYZ	MSTRG.1577	ENSG00000116791	2.71271	11.6778	2.10556	0.000820092
145	ALDH3A2	MSTRG.31318	ENSG00000072210	4.20358	10.773	1.35752	0.000972316
146	TNFRSF11B	MSTRG.17482	ENSG00000164761	35.7671	143.597	2.00529	0.000994323
147	SNX5	MSTRG.36649	ENSG00000089006	8.91692	16.9001	0.922336	0.000994323
148	CPQ	MSTRG.17281	ENSG00000104324	23.4188	45.8067	0.967861	0.000996209
149	TMEM176B	MSTRG.16293	ENSG00000106565	26.6832	144.739	2.43941	0.000997357
150	SHISA3	MSTRG.9447	ENSG00000178343	0.006641	1.43616	7.55524	0.000997357
151	CPE	MSTRG.10427	ENSG00000109472	13.3165	29.9173	1.1677	0.00100886
152	SYT11	MSTRG.2660	ENSG00000132718	4.98882	18.1495	1.86295	0.00105476
153	MTSS2	MSTRG.30336	ENSG00000132613	7.75554	16.61	1.09865	0.00115864
154	ANKRD20A12P	MSTRG.40839	-	0.0716345	1.78066	4.61643	0.0011936
155	MLKL	MSTRG.30417	ENSG00000168404	0.904367	4.53449	2.32468	0.00122739
156	VWCE	MSTRG.22143	ENSG00000167992	1.61935	6.36726	1.97459	0.00123369
157	RGS20	MSTRG.16918	ENSG00000147509	0.231279	2.03784	3.13382	0.00126524
158	TSPAN11	MSTRG.24056	ENSG00000110900	0	1.89679	10.8901	0.00127062
159	SELENOS	MSTRG.28995	ENSG00000131871	25.8038	39.4726	0.613249	0.00127503
160	IL17D	MSTRG.25582	ENSG00000172458	0.175095	1.28908	2.87304	0.00135931
161	LAP3	MSTRG.9307	ENSG00000002549	14.5161	40.798	1.49078	0.00138668
162	LGALS9	MSTRG.31380	ENSG00000168961	0.165764	10.6673	5.99937	0.00139971
163	OXER1	MSTRG.4487	ENSG00000162881	0.573762	3.56517	2.63334	0.00141519
164	LBX2	MSTRG.4948	ENSG00000179528	0.0349911	0.991812	4.78581	0.00159516
165	RPA2	MSTRG.726	ENSG00000117748	11.2754	19.8773	0.81789	0.00159516
166	PHF19	MSTRG.19090	ENSG00000119403	1.14784	2.64892	1.20577	0.00162224
167	HAAO	MSTRG.4490	ENSG00000162882	1.66034	6.30253	1.92381	0.00162939
168	BTG1	MSTRG.24864	ENSG00000133639	7.61653	22.4281	1.55798	0.00163832
169	GUSB	MSTRG.15046	ENSG00000169919	10.6232	19.7637	0.895576	0.00174336
170	CACNA1A	MSTRG.34507	ENSG00000141837	0.00159442	1.08027	8.7031	0.00184286
171	ITGBL1	MSTRG.26139	ENSG00000198542	13.9803	31.8468	1.18769	0.00191633
172	SEC11C	MSTRG.33391	ENSG00000166562	13.9388	29.5265	1.08286	0.00193718
173	ADAMTS19	MSTRG.11692	ENSG00000145808	0.0974693	1.71531	4.12349	0.00194051
174	SLCO3A1	MSTRG.28879	ENSG00000176463	1.80235	4.41724	1.29279	0.00195586
175	CCN3	MSTRG.17489	ENSG00000136999	1.89201	14.3511	2.92251	0.00213928
176	TNFAIP2	MSTRG.27485	ENSG00000185215	0.641237	5.50348	3.09943	0.00223135
177	MSC	MSTRG.17072	ENSG00000178860	8.14051	19.7333	1.27734	0.00227106
178	SPAG5	MSTRG.31409	ENSG00000076382	0.557596	3.95699	2.82489	0.00238816
179	SHFL	MSTRG.34252	ENSG00000130813	11.2188	34.194	1.60774	0.00239332
180	PLBD1	MSTRG.23913	ENSG00000121316	2.4509	9.75681	1.99266	0.00254176
181	SNCA	MSTRG.9872	ENSG00000145335	1.18528	3.21835	1.44032	0.00262936
182	ANKRD18B	MSTRG.40841	ENSG00000230453	0.0390574	1.15367	4.84927	0.00263065
183	TM4SF1	MSTRG.8413	ENSG00000169908	1.59982	10.6048	2.72797	0.00263065
184	CLU	MSTRG.16656	ENSG00000120885	25.2282	46.8696	0.893591	0.00267287
185	PARP9	MSTRG.8078	ENSG00000138496	1.24139	6.58532	2.40636	0.00274555
186	STEAP1	MSTRG.14515	ENSG00000164647	1.22213	5.16529	2.07856	0.00279826
187	HSPB7	MSTRG.404	ENSG00000173641	6.30615	16.5161	1.3889	0.00307423
188	KRT7	MSTRG.24351	ENSG00000135480	0.638145	2.77148	2.11696	0.00325178
189	SRXN1	MSTRG.36436	ENSG00000271303	30.7908	56.0247	0.863542	0.00334628
190	LINC00269	MSTRG.36585	ENSG00000215162	0	0.979969	9.93806	0.00334628
191	CLIC2	MSTRG.40218	ENSG00000155962	0.106148	3.0875	4.84923	0.00334628
192	CENPH	MSTRG.11154	ENSG00000153044	0.947427	5.05001	2.41296	0.0033534
193	NCR3LG1	MSTRG.21732	ENSG00000188211	0	1.45058	10.5034	0.00337008
194	SFN	MSTRG.667	ENSG00000175793	0.18448	1.84327	3.31372	0.00342921
195	PNP	MSTRG.26316	ENSG00000198805	6.55504	13.7452	1.06814	0.00353203
196	IFIT2	MSTRG.20679	ENSG00000119922	1.10278	15.0579	3.77009	0.00366434
197	RDH10	MSTRG.17100	ENSG00000121039	3.40233	7.04945	1.05077	0.00371373
198	TLR3	MSTRG.10569	ENSG00000164342	0	2.704	11.4014	0.00393652
199	SGCE	MSTRG.15441	ENSG00000127990	21.8651	41.9291	0.939288	0.00401493
200	CIT	MSTRG.25281	ENSG00000122966	0.000508161	2.32284	10.5895	0.00426269
201	LRR1	MSTRG.26647	ENSG00000165501	2.36511	5.4628	1.20739	0.0043118
202	KCTD12	MSTRG.26011	ENSG00000178695	1.40765	5.6084	1.99353	0.00432092
203	PARP12	MSTRG.16123	ENSG00000059378	1.90915	10.868	2.50846	0.00451266
204	C1QL1	MSTRG.32016	ENSG00000131094	0.413552	3.45913	3.0612	0.00468915
205	CYP2J2	MSTRG.1445	ENSG00000134716	0	1.11234	10.1207	0.00469858
206	FAM47E	MSTRG.9700	ENSG00000189157	2.75475	7.3091	1.40745	0.00469858
207	IRF7	MSTRG.21369	ENSG00000185507	0.144969	4.10307	4.81332	0.00471102
208	EPHX1	MSTRG.3598	ENSG00000143819	22.0829	38.4013	0.798198	0.00475518
209	TPX2	MSTRG.36797	ENSG00000088325	5.54798	14.2794	1.36374	0.00480938
210	ETV7	MSTRG.13035	ENSG00000010030	0.196531	2.23211	3.4989	0.00493058
211	NALF1	MSTRG.26176	ENSG00000204442	1.32333	4.87525	1.88051	0.00493058
212	HMMR	MSTRG.12249	ENSG00000072571	0	2.11162	11.0448	0.00504916
213	CHAC1	MSTRG.27843	ENSG00000128965	28.7914	59.5325	1.04801	0.00517477
214	SLC25A28	MSTRG.20860	ENSG00000155287	6.63957	13.306	1.0028	0.00525237
215	FGF2	MSTRG.10147	ENSG00000138685	4.33752	13.0579	1.58975	0.00567593
216	DDX60	MSTRG.10435	ENSG00000137628	0.167791	4.90881	4.86236	0.00571849
217	TRIM21	MSTRG.21504	ENSG00000132109	10.6402	25.2351	1.24582	0.00571849
218	SNAP25	MSTRG.36618	ENSG00000132639	0.371623	2.12594	2.51299	0.00572893
219	EFHD1	MSTRG.6593	ENSG00000115468	3.92734	10.1622	1.37136	0.00576167
220	NR1D1	MSTRG.31718	ENSG00000126368	3.7757	12.079	1.67742	0.00580047
221	HSD3B7	MSTRG.29867	ENSG00000099377	7.26245	14.8245	1.02935	0.00580288
222	CDH2	MSTRG.33197	ENSG00000170558	2.34561	7.96487	1.76325	0.00601036
223	SLC6A17	MSTRG.1956	ENSG00000197106	0	2.53916	11.3107	0.00630202
224	KCNJ6	MSTRG.37726	ENSG00000157542	0.0301926	1.47182	5.56124	0.00630202
225	CDC20	MSTRG.1132	ENSG00000117399	6.20708	12.9136	1.05679	0.0063401
226	RIGI	MSTRG.18076	ENSG00000107201	0.700513	18.1487	4.69333	0.00652598
227	IFIH1	MSTRG.5774	ENSG00000115267	0.240426	6.89342	4.83577	0.00652598
228	MX1	MSTRG.37749	ENSG00000157601	2.32424	75.8789	5.02827	0.00659831
229	PHYH	MSTRG.19836	ENSG00000107537	9.44486	17.2579	0.869584	0.00667406
230	HS6ST1	MSTRG.5542	ENSG00000136720	9.94343	16.8348	0.759574	0.00677347
231	HSPA2	MSTRG.26911	ENSG00000126803	5.16216	12.999	1.33219	0.00697533
232	TMEM35B	MSTRG.898	ENSG00000243749	11.5063	20.2717	0.816989	0.0070469
233	ELFN1	MSTRG.14267	ENSG00000225968	1.35839	3.35911	1.30555	0.0072078
234	IFITM10	MSTRG.21425	ENSG00000244242	0.564517	5.02744	3.15247	0.00736954
235	ENTPD1	MSTRG.20759	ENSG00000138185	0.0569136	0.901839	3.96249	0.00737909
236	OLFML2B	MSTRG.2844	ENSG00000162745	0.575492	4.59586	2.99527	0.00737909
237	SH2D4A	MSTRG.16532	ENSG00000104611	2.04527	5.42731	1.40751	0.00746588
238	HAPLN1	MSTRG.11375	ENSG00000145681	0	1.18536	10.2123	0.00764517
239	EPSTI1	MSTRG.25812	ENSG00000133106	0.220117	1.66851	2.91654	0.00778028
240	POSTN	MSTRG.25750	ENSG00000133110	16.0915	13.9836	-0.202549	0.00810312
241	TCEA3	MSTRG.544	ENSG00000204219	2.13757	4.95418	1.21229	0.00824841
242	CDH13	MSTRG.30488	ENSG00000140945	2.05977	5.27859	1.35724	0.00844886
243	ADAM23	MSTRG.6259	ENSG00000114948	1.12642	3.88539	1.78541	0.00844886
244	UBE2L6	MSTRG.22059	ENSG00000156587	51.3542	110.44	1.1047	0.00877046
245	HELZ2	MSTRG.37409	ENSG00000130589	0.458829	4.95525	3.43008	0.00877046
246	PTPRU	MSTRG.760	ENSG00000060656	3.48317	10.2549	1.55757	0.00902197
247	GRP	MSTRG.33392	ENSG00000134443	4.61238	19.0964	2.04948	0.00918097
248	H2BC14	MSTRG.12783	ENSG00000273703	4.9767	9.52934	0.937048	0.0093735
249	SDC1	MSTRG.4140	ENSG00000115884	25.54	46.3029	0.85832	0.0093735
250	H4C1	MSTRG.2356	ENSG00000278637	0.253369	1.14193	2.16774	0.00939631
251	H4C2		ENSG00000278705
252	H4C3		ENSG00000197061
253	H4C4		ENSG00000277157
254	H4C5		ENSG00000276966
255	H4C6		ENSG00000274618
256	H4C8		ENSG00000158406
257	H4C9		ENSG00000276180
258	H4C11		ENSG00000197238
259	H4C12		ENSG00000273542
260	H4C13		ENSG00000275126
261	H4C14		ENSG00000270882
262	H4C15		ENSG00000270276
263	H4C16		ENSG00000197837
264	CPZ	MSTRG.9248	ENSG00000109625	11.7313	30.8278	1.3938	0.00969074
265	ADRB2	MSTRG.12043	ENSG00000169252	0.414583	2.14545	2.36874	0.00973921
266	KIF2C	MSTRG.1184	ENSG00000142945	1.93211	4.70575	1.28381	0.00977057
267	TEX30	MSTRG.26154	ENSG00000151287	0.896782	2.32604	1.37406	0.00977836
268	HES4	MSTRG.46	ENSG00000188290	1.09465	4.69274	2.09895	0.00980934
269	CDC25B	MSTRG.36534	ENSG00000101224	15.1698	26.2436	0.79072	0.0101632
270	TRIP13	MSTRG.10617	ENSG00000071539	1.77423	4.6305	1.38348	0.0102193
271	TUSC1	MSTRG.18049	ENSG00000198680	3.59833	8.63335	1.26236	0.0102747
272	DPT	MSTRG.2907	ENSG00000143196	5.63854	22.0901	1.96982	0.0103131
273	ZWINT	MSTRG.20250	ENSG00000122952	1.89034	5.10982	1.43414	0.0103745
274	MFGE8	MSTRG.28802	ENSG00000140545	63.0247	115.612	0.875292	0.0103745
275	CDCA3	MSTRG.23717	ENSG00000111665	0.736824	2.24045	1.60308	0.0103818
276	ECRG4	MSTRG.5287	ENSG00000119147	0	0.711959	9.47767	0.0109098
277	HAUS1	MSTRG.33279	ENSG00000152240	6.35672	11.8902	0.903316	0.0112138
278	IRX5	MSTRG.30031	ENSG00000176842	1.63246	4.12694	1.33749	0.0112472
279	CD40	MSTRG.37147	ENSG00000101017	0.475936	2.30003	2.27041	0.0113403
280	TMEM106C	MSTRG.24173	ENSG00000134291	21.8182	35.5356	0.703708	0.0114446
281	MTHFD2	MSTRG.4925	ENSG00000065911	6.78111	11.4718	0.758412	0.0117113
282	PDE1A	MSTRG.6016	ENSG00000115252	0.363141	2.21331	2.60429	0.0117113
283	IGFBP7	MSTRG.9596	ENSG00000163453	167.69	273.931	0.708008	0.0122133
284	RIPOR3	MSTRG.37208	ENSG00000042062	0	0.850551	9.73395	0.0123632
285	ATP10A	MSTRG.27645	ENSG00000206190	1.19145	2.55166	1.09808	0.0123873
286	STAT1	MSTRG.6104	ENSG00000115415	41.9092	136.245	1.70084	0.0123873
287	PAG1	MSTRG.17155	ENSG00000076641	0.0532027	1.2187	4.49201	0.0126391
288	LRATD2	MSTRG.17567	ENSG00000168672	0.530666	3.23428	2.6053	0.0127389
289	DUSP10	MSTRG.3523	ENSG00000143507	3.20986	7.07004	1.13896	0.0127657
290	CALM2	MSTRG.4579	ENSG00000143933	58.7938	111.213	0.919575	0.0127657
291	CES2	MSTRG.30144	ENSG00000172831	13.9377	22.2776	0.67656	0.0129015
292	MYO19	MSTRG.31636	ENSG00000278259	0.759794	1.88813	1.31214	0.0129376
293	HM13	MSTRG.36785	ENSG00000101294	46.1329	68.0521	0.560833	0.0132465
294	MMP16	MSTRG.17186	ENSG00000156103	0	0.734723	9.52302	0.0134353
295	FAIM2	MSTRG.24265	ENSG00000135472	0.241281	2.69092	3.47388	0.0135231
296	TEKT4	MSTRG.40343	ENSG00000163060	1.64664	3.45502	1.06871	0.0135854
297	CPT1C	MSTRG.35933	ENSG00000169169	2.01947	5.98317	1.56646	0.013665
298	CDKN3	MSTRG.26768	ENSG00000100526	2.21831	4.92678	1.15083	0.0139942
299	RNF4	MSTRG.27958	ENSG00000063978	2.43343	7.22702	1.57002	0.0141012
300	MRPL32	MSTRG.14816	ENSG00000106591	22.1873	33.093	0.576774	0.0142182
301	SLC43A3	MSTRG.22050	ENSG00000134802	3.54189	11.2576	1.66803	0.0142476
302	MLLT11	MSTRG.2462	ENSG00000213190	5.47212	11.1139	1.02206	0.0142476
303	TMEM176A	MSTRG.16295	ENSG00000002933	22.0036	110.154	2.32365	0.0143553
304	C1orf115	MSTRG.3513	ENSG00000162817	13.6146	28.9284	1.08728	0.0146416
305	SKA2	MSTRG.32344	ENSG00000182628	4.14696	9.30223	1.16533	0.0147449
306	RASGRF2	MSTRG.11341	ENSG00000113319	0.34631	2.52454	2.8623	0.014801
307	HSPB8	MSTRG.25275	ENSG00000152137	9.78276	26.6754	1.4471	0.0148422
308	SALL1	MSTRG.29989	ENSG00000103449	0.259466	1.62934	2.64601	0.0150223
309	GGH	MSTRG.16981	ENSG00000137563	13.4536	25.8329	0.941169	0.0151563
310	ASPN	MSTRG.18632	ENSG00000106819	1.56682	4.75633	1.60139	0.0151723
311	CRIP2	MSTRG.27602	ENSG00000182809	3.7889	8.36274	1.14199	0.0153268
312	AK4	MSTRG.1506	ENSG00000162433	0	1.35084	10.4007	0.0154358
313	TIPIN	MSTRG.28320	ENSG00000075131	0.445664	1.85616	2.05583	0.0155178
314	STK32B	MSTRG.9161	ENSG00000152953	1.78185	5.39155	1.59678	0.0155178
315	CHRM2	MSTRG.16073	ENSG00000181072	3.2026	9.05042	1.49845	0.015931
316	CES3	MSTRG.30153	ENSG00000172828	0	1.11216	10.1204	0.0160318
317	MPP4	MSTRG.6212	ENSG00000082126	0	1.16394	10.186	0.0160318
318	TMT1A	MSTRG.24289	ENSG00000185432	0.701553	1.92076	1.45175	0.0160531
319	GAL3ST4	MSTRG.15547	ENSG00000197093	4.75752	13.7226	1.52807	0.0161505
320	CEP95	MSTRG.32482	ENSG00000258890	0.175335	0.761954	2.11327	0.0168864
321	RNASE4	MSTRG.26319	ENSG00000258818	3.57026	6.73726	0.915942	0.0172293
322	RPSA	MSTRG.24674	ENSG00000258818	1.1345	3.8276	1.75349	0.0173542
323	INHBA	MSTRG.14805	ENSG00000122641	0	2.20609	11.1079	0.0178523
324	PGGHG	MSTRG.21339	ENSG00000142102	39.3959	110.929	1.4935	0.0178523
325	B2M	MSTRG.27957	ENSG00000166710	680.265	1488.41	1.12961	0.0178781
326	DHX58	MSTRG.31801	ENSG00000108771	1.72222	6.04792	1.81157	0.0179182
327	HPSE	MSTRG.9795	ENSG00000173083	0	1.17909	10.2047	0.0193392
328	SCD5	MSTRG.9783	ENSG00000145284	5.14356	16.1595	1.65135	0.0194832
329	TMBIM1	MSTRG.6384	ENSG00000135926	58.8575	107.165	0.864527	0.0200708
330	SNTA1	MSTRG.36832	ENSG00000101400	2.7172	6.73585	1.30942	0.0200842
331	LHFPL6	MSTRG.25765	ENSG00000183722	63.1598	117.965	0.901267	0.0203582
332	CPPED1	MSTRG.29473	ENSG00000103381	5.76697	11.4198	0.985522	0.0207554
333	UTY	MSTRG.9695	ENSG00000183878	0.0496604	1.10774	4.45192	0.0209012
334	ELN	MSTRG.15167	ENSG00000049540	64.322	118.272	0.878713	0.0209469
335	SLC41A1	MSTRG.3372	ENSG00000133065	6.81167	16.9373	1.314	0.0210632
336	TRIM5	MSTRG.21508	ENSG00000132256	1.66969	4.64067	1.4742	0.0211035
337	KRT40	MSTRG.31761	ENSG00000204889	0	0.672585	9.39572	0.021606
338	MGST2	MSTRG.10254	ENSG00000085871	2.34836	3.45749	0.557874	0.0216075
339	ARHGAP24	MSTRG.9808	ENSG00000138639	0.422097	1.33277	1.65645	0.0216868
340	GADD45A	MSTRG.1533	ENSG00000116717	32.0544	57.1136	0.833292	0.0219093
341	KYNU	MSTRG.5643	ENSG00000115919	0.0279062	0.927606	5.00562	0.021929
342	CLEC11A	MSTRG.35998	ENSG00000105472	71.5518	138.693	0.954821	0.0220643
343	NAAA	MSTRG.9688	ENSG00000138744	2.86841	8.95386	1.64192	0.0224974
344	FEZ1	MSTRG.23461	ENSG00000149557	6.64889	10.6282	0.676634	0.0228471
345	C1orf54	MSTRG.2388	ENSG00000118292	3.18314	10.0076	1.65227	0.0230389
346	CYSRT1	MSTRG.19635	ENSG00000197191	0.400381	2.0228	2.33402	0.0231468
347	TRIM22	MSTRG.21512	ENSG00000132274	11.1765	25.6109	1.19622	0.0232055
348	SCPEP1	MSTRG.32303	ENSG00000121064	21.8594	42.1835	0.948391	0.0233008
349	LGALS3BP	MSTRG.32777	ENSG00000108679	72.0837	167.676	1.21792	0.0234163
350	COQ2	MSTRG.9794	ENSG00000173085	3.84889	6.84668	0.830796	0.0234753
351	COPS8	MSTRG.6633	ENSG00000198612	15.5112	27.2872	0.814874	0.0239282
352	C11orf68	MSTRG.22473	ENSG00000175573	30.7738	53.097	0.786906	0.0242586
353	RNF170	MSTRG.16858	ENSG00000120925	2.30951	4.45325	0.946971	0.0243804
354	TOR1B	MSTRG.19380	ENSG00000136816	14.0645	26.9204	0.936594	0.0244225
355	NUSAP1	MSTRG.27860	ENSG00000137804	2.39744	6.68752	1.47959	0.0244929
356	KCNF1	MSTRG.4075	ENSG00000162975	0.07022	1.00242	3.8165	0.0247033
357	DDX60L	MSTRG.10442	ENSG00000181381	0.501686	6.09247	3.59954	0.025104
358	CREG1	MSTRG.2887	ENSG00000143162	15.8661	32.2856	1.0249	0.025104
359	ZNFX1	MSTRG.37177	ENSG00000124201	5.44414	21.233	1.96333	0.0252143
360	PSAT1	MSTRG.18511	ENSG00000135069	38.6519	46.7134	0.273292	0.0254517
361	SP110	MSTRG.6532	ENSG00000135899	1.12663	3.02188	1.42263	0.0254517
362	CCDC28A-AS1	MSTRG.17435	ENSG00000279968	0.0326218	0.757497	4.49568	0.0259605
363	TYSND1	MSTRG.20391	ENSG00000156521	3.89801	6.44069	0.72433	0.0259605
364	PPM1K	MSTRG.9844	ENSG00000163644	1.64307	5.55895	1.7578	0.0260426
365	HSPB6	MSTRG.35088	ENSG00000004776	109.606	206.038	0.910581	0.0262697
366	HCFC1R1	MSTRG.29301	ENSG00000103145	19.3	35.9246	0.896335	0.0263016
367	MX2	MSTRG.37748	ENSG00000183486	0	12.3241	13.5893	0.0267626
368	CALCOCO2	MSTRG.32164	ENSG00000136436	13.4231	21.7296	0.694902	0.0271203
369	PTTG1	MSTRG.12244	ENSG00000164611	15.9279	27.5974	0.79294	0.0272057
370	H2BC18	MSTRG.2212	ENSG00000203814	0.437634	1.74108	1.98972	0.02756
371	NECAB2	MSTRG.30497	ENSG00000103154	7.28564	12.8568	0.819312	0.027768
372	ZNF224	MSTRG.35541	ENSG00000267680	0.147509	1.37975	3.21683	0.027768
373	NDN	gene-NDN	ENSG00000182636	0.931056	3.03097	1.70177	0.0281119
374	IFITM1	MSTRG.21343	ENSG00000185885	0.204476	1.50335	2.8721	0.028205
375	RAB42	MSTRG.742	ENSG00000188060	0.0937255	1.26299	3.73809	0.028855
376	CDC42EP2	MSTRG.22394	ENSG00000149798	8.14755	12.9961	0.673577	0.029041
377	WDR87	MSTRG.35234	ENSG00000171804	0.00324322	0.499377	6.88171	0.0294312
378	SAP30	MSTRG.10463	ENSG00000164105	4.21039	7.77715	0.885131	0.0294943
379	DTX4	MSTRG.22114	ENSG00000110042	2.33324	19.2874	3.04671	0.0295118
380	PHLDA1	MSTRG.24759	ENSG00000139289	18.5282	51.4059	1.47216	0.0295118
381	H2AC7	MSTRG.3687	ENSG00000196866	1.9296	4.28457	1.15044	0.0296684
382	PDE6B	MSTRG.8993	ENSG00000133256	0.0725048	0.734967	3.32373	0.0296684
383	PYGB	MSTRG.36717	ENSG00000100994	57.5474	80.0045	0.475322	0.0297372
384	MGAT5B	MSTRG.32727	ENSG00000167889	0.0761746	1.52266	4.30327	0.0302789
385	WNT9A	MSTRG.3641	ENSG00000143816	0.304508	3.33287	3.44792	0.0307672
386	SLC7A11	MSTRG.10212	ENSG00000151012	8.7415	21.0696	1.26911	0.030818
387	ARHGAP22	MSTRG.20196	ENSG00000128805	0.930039	2.72583	1.55031	0.0313428
388	SETDB2	MSTRG.25897	ENSG00000136169	2.82561	5.24613	0.892453	0.0313428
389	PSMC3IP	MSTRG.31826	ENSG00000131470	1.08605	3.7918	1.80284	0.0313428
390	PROCA1	MSTRG.31419	ENSG00000167525	0	0.694152	9.44118	0.0319646
391	TSPAN13	MSTRG.14472	ENSG00000106537	6.57103	16.0521	1.28844	0.0319916
392	C1S	MSTRG.23766	ENSG00000182326	77.2784	165.592	1.09949	0.0320008
393	FANCL	MSTRG.4678	ENSG00000115392	0.83481	3.04894	1.86753	0.0329351
394	FBXO16	MSTRG.16673	ENSG00000214050	0.0516512	1.21479	4.52928	0.0336102
395	APLP1	MSTRG.35094	ENSG00000105290	3.52462	11.7731	1.73966	0.0336102
396	C1orf21	MSTRG.3154	ENSG00000116667	0.699466	2.37666	1.76316	0.0338421
397	CYB561	MSTRG.32442	ENSG00000008283	14.5887	24.5024	0.748029	0.0339099
398	EMC7	MSTRG.27699	ENSG00000134153	73.6192	108.463	0.559039	0.0339911
399	TMEM123	MSTRG.23117	ENSG00000152558	17.1748	45.6969	1.41175	0.0345818
400	CRYAB	MSTRG.23224	ENSG00000109846	54.9383	87.3642	0.669219	0.0346778
401	GLOD4	MSTRG.30768	ENSG00000167699	11.2602	18.4361	0.711258	0.0347965
402	LACTB2	MSTRG.17067	ENSG00000147592	2.26444	5.5286	1.28739	0.034924
403	KLF10	MSTRG.17378	ENSG00000155090	4.96293	14.4977	1.54637	0.034924
404	CHPT1	MSTRG.24960	ENSG00000111666	9.80081	20.723	1.08019	0.0351212
405	BLVRB	MSTRG.35334	ENSG00000090013	38.7411	59.0202	0.60733	0.0363187
406	SOCS2	MSTRG.24877	ENSG00000120833	0.177445	0.684125	1.94089	0.0364896
407	LNPEP	MSTRG.11461	ENSG00000113441	0	1.99401	10.9622	0.0366847
408	C16orf89	MSTRG.24831	ENSG00000153446	0.201485	1.56851	2.95442	0.0366847
409	PTGDR2	MSTRG.22131	ENSG00000183134	0.0197884	1.06526	5.68063	0.0371065
410	OAS3	MSTRG.25185	ENSG00000111331	0.401678	33.6683	6.38566	0.0376763
411	SPR	MSTRG.4893	ENSG00000116096	15.3513	24.3949	0.668183	0.0381314
412	BATF2	MSTRG.22354	ENSG00000168062	0.858439	14.0971	4.03596	0.0382786
413	DTL	MSTRG.3447	ENSG00000143476	0.313334	3.71561	3.56362	0.0382972
414	IFIT5	MSTRG.20686	ENSG00000152778	3.3335	9.0711	1.44397	0.0388907
415	MC4R	MSTRG.33399	ENSG00000166603	0.118135	1.07657	3.17711	0.039141
416	ICMT	MSTRG.226	ENSG00000116237	21.8536	34.7909	0.670809	0.0395376
417	TWIST2	MSTRG.6716	ENSG00000233608	2.15558	3.52495	0.709268	0.0397109
418	PCGF5	MSTRG.20699	ENSG00000180628	0.288453	0.893224	1.62731	0.0397915
419	LINC00269	MSTRG.37028	ENSG00000215162	0.0268035	0.673385	4.60024	0.0397915
420	CFLAR	MSTRG.6188	ENSG00000003402	1.24285	2.04443	0.717592	0.0399767
421	S100A4	MSTRG.2525	ENSG00000196154	105.082	181.197	0.786039	0.0406998
422	TIGAR	MSTRG.23625	ENSG00000078237	3.25054	7.23577	1.15422	0.0407228
423	POGLUT3	MSTRG.23193	ENSG00000178202	4.50344	13.6185	1.59626	0.0411173
424	NDC80	MSTRG.33013	ENSG00000080986	0.70965	3.62558	2.3514	0.0411173
425	ZNF442	MSTRG.34431	ENSG00000198342	0.0796636	0.438179	2.44482	0.0411173
426	ID3	gene-ID3	ENSG00000117318	7.50197	24.4312	1.70325	0.0411173
427	E2F1	MSTRG.36842	ENSG00000101412	2.26088	5.76763	1.35071	0.0415882
428	COMP	MSTRG.34757	ENSG00000105664	11.4923	29.6654	1.36804	0.0418541
429	SULF2	MSTRG.37161	ENSG00000196562	5.80705	19.2708	1.73037	0.0418541
430	ADAMTSL4	MSTRG.2410	ENSG00000143382	0.240277	1.42059	2.55874	0.0419961
431	SP100	MSTRG.6535	ENSG00000067066	1.56134	5.85613	1.90648	0.042131
432	HOXD1	MSTRG.5915	ENSG00000128645	0.174079	1.17524	2.74811	0.0425331
433	PIGN	MSTRG.33414	ENSG00000197563	0.974544	1.47	0.592513	0.0430059
434	FZD1	MSTRG.15373	ENSG00000157240	1.63451	4.33506	1.40665	0.0435442
435	PAPPA	MSTRG.19067	ENSG00000182752	1.77975	9.00731	2.33877	0.0435442
436	MRPL34	MSTRG.34658	ENSG00000130312	17.4076	24.3506	0.484216	0.0435442
437	CKLF	MSTRG.30129	ENSG00000217555	4.51443	6.76322	0.583061	0.0436745
438	TMEM128	MSTRG.9141	ENSG00000132406	4.1681	8.45407	1.02008	0.0438024
439	HS1BP3	MSTRG.4148	ENSG00000118960	6.01824	10.1631	0.755827	0.0439838
440	ALG2	MSTRG.18814	ENSG00000119523	10.0946	17.6486	0.805905	0.0440489
441	ALG1	MSTRG.21481	ENSG00000033011	0.707697	1.64205	1.21314	0.0441432
442	LDHA	MSTRG.21739	ENSG00000134333	97.355	142.032	0.544888	0.044208
443	PLK1	MSTRG.29629	ENSG00000166851	4.50495	9.28447	1.04315	0.044362
444	CDC6	MSTRG.31731	ENSG00000094804	1.04486	3.79688	1.8605	0.0445879
445	CRISPLD1	MSTRG.17114	ENSG00000121005	0	0.956748	9.9035	0.0447066
446	CMBL	MSTRG.10684	ENSG00000164237	4.37652	8.56794	0.969004	0.0447158
447	TOR3A	MSTRG.3056	ENSG00000186283	19.82	28.2617	0.511867	0.0447158
448	PLTP	MSTRG.37130	ENSG00000100979	58.9306	117.871	1.00011	0.0454706
449	PSMA3	MSTRG.26812	ENSG00000100567	43.0573	66.3802	0.624485	0.0464377
450	GRPEL1	MSTRG.9213	ENSG00000109519	8.31452	13.3185	0.679662	0.0464377
451	TMEM9	MSTRG.3245	ENSG00000116857	21.7724	31.8431	0.548458	0.0464861
452	MAT2A	MSTRG.5040	ENSG00000168906	43.04	66.5985	0.629801	0.0465142
453	ABI3BP	MSTRG.7903	ENSG00000154175	0.199369	1.67623	3.06535	0.0466117
454	SLC52A1	MSTRG.30914	ENSG00000132517	0.499988	2.61629	2.38522	0.047018
455	BTG2	MSTRG.3316	ENSG00000159388	12.3433	21.2642	0.784653	0.0473003
456	CNRIP1	MSTRG.4823	ENSG00000119865	13.3999	21.2343	0.664135	0.0473003
457	TRIM25	MSTRG.32300	ENSG00000121060	4.08456	21.1529	2.37232	0.047857
458	TACC3	MSTRG.9061	ENSG00000013810	3.73468	7.29821	0.96637	0.0480639
459	ATP6V0E2	MSTRG.16267	ENSG00000171130	4.97558	9.29133	0.900884	0.0490908
460	TFPI	MSTRG.6043	ENSG00000003436	17.9284	38.5305	1.10371	0.0490908
461	FADS1	MSTRG.22173	ENSG00000149485	32.6013	63.1705	0.954299	0.049183
462	FAAP24	MSTRG.35002	ENSG00000131944	0.160364	1.44834	3.16701	0.0497325

## Sheet: MvsO(O↓)
	Supplementary Table S3D.
	Differentially expressed genes (DEGs) in normal human dermal fibroblasts (NHDFs) (padj < 0.05).
	Gene name	MSTRG ID	Ensembl ID	avg. RPKM		log2FC	padj
				middle	old
1	RPS12	MSTRG.13846	ENSG00000112306	930.482	409.19	-1.18521	9.44367e-20
2	GAS6	MSTRG.26287	ENSG00000183087	562.348	238.184	-1.23939	4.98183e-14
3	TSPAN9	MSTRG.23606	ENSG00000011105	39.2912	13.9408	-1.49483	1.71651e-11
4	RAB32	MSTRG.13969	ENSG00000118508	55.2072	21.6646	-1.34947	1.68431e-10
5	GLRX	MSTRG.11445	ENSG00000173221	197.916	74.7466	-1.40479	3.16023e-10
6	PSMB1	MSTRG.14223	ENSG00000008018	136.913	67.875	-1.0123	3.968e-10
7	LOXL4	MSTRG.20839	ENSG00000138131	332.213	52.4195	-2.66391	4.77807e-09
8	ITGA5	MSTRG.24447	ENSG00000161638	94.2499	56.8435	-0.729485	9.85382e-09
9	EEF1A1	MSTRG.14516	ENSG00000156508	206.924	104.324	-0.988024	2.04404e-08
10	ICAM1	MSTRG.34267	ENSG00000090339	88.1713	26.0127	-1.76105	3.40914e-08
11	RPS18	gene-RPS18	ENSG00000231500	187.28	94.8136	-0.982026	4.94155e-08
12	ILRUN	MSTRG.12988	ENSG00000196821	22.9144	13.185	-0.797307	5.18106e-08
13	CITED2	MSTRG.13907	ENSG00000164442	135.977	61.8987	-1.13537	5.64708e-08
14	SEMA7A	gene-SEMA7A	ENSG00000138623	7.62161	2.02256	-1.91339	1.4217e-07
15	MARVELD1	MSTRG.20828	ENSG00000155254	92.4598	60.5541	-0.610593	2.03431e-07
16	NES	MSTRG.2706	ENSG00000132688	71.9506	32.1782	-1.1609	4.72209e-07
17	NFKBIE	MSTRG.13225	ENSG00000146232	11.2209	2.91998	-1.9418	5.40289e-07
18	ALPL	MSTRG.502	ENSG00000162551	41.501	10.7197	-1.95278	6.54443e-07
19	SLC35B2	MSTRG.13224	ENSG00000157593	49.8584	30.7832	-0.695673	1.83766e-06
20	FUCA2	MSTRG.13940	ENSG00000001036	42.2876	24.3917	-0.793818	1.83766e-06
21	MTCH1	MSTRG.13050	ENSG00000137409	67.0481	45.5746	-0.556957	2.6673e-06
22	EEF2	MSTRG.33921	ENSG00000167658	662.507	484.053	-0.452769	4.78932e-06
23	DBN1	MSTRG.12400	ENSG00000113758	61.5198	26.8737	-1.19483	5.07167e-06
24	TMEM14C	MSTRG.12662	ENSG00000111843	56.9951	33.963	-0.746857	5.07852e-06
25	YIPF3	MSTRG.13186	ENSG00000137207	99.2485	60.4836	-0.714492	5.83161e-06
26	LOXL3	MSTRG.4954	ENSG00000115318	4.69312	0.854042	-2.45679	6.57598e-06
27	SF3B5	MSTRG.13947	ENSG00000169976	95.4432	40.3453	-1.24222	7.10101e-06
28	ZNF703	MSTRG.16757	ENSG00000183779	19.2652	9.15093	-1.07392	7.10101e-06
29	IL17RC	MSTRG.6867	ENSG00000163702	7.71992	2.77321	-1.4767	7.73174e-06
30	KRT17	MSTRG.31771	ENSG00000128422	31.8302	9.90794	-1.68364	8.7739e-06
31	QARS1	MSTRG.7444	ENSG00000172053	58.6098	33.3325	-0.814192	1.01827e-05
32	GTF3C6	MSTRG.13680	ENSG00000155115	36.8458	22.6152	-0.704182	1.07956e-05
33	TBX5	MSTRG.25221	ENSG00000089225	2.58436	0.0599126	-5.40748	1.14286e-05
34	NUDT3	MSTRG.12984	ENSG00000272325	33.1942	14.6353	-1.18142	1.17155e-05
35	CSRP1	MSTRG.3252	ENSG00000159176	276.445	124.31	-1.15304	1.22178e-05
36	GMDS	MSTRG.12545	ENSG00000112699	0.803886	0.328923	-1.28666	1.95605e-05
37	STING1	gene-STING1	ENSG00000184584	13.5522	4.96295	-1.44907	2.03857e-05
38	GNAI2	MSTRG.7501	ENSG00000114353	80.4333	46.7135	-0.783941	2.07896e-05
39	PRSS3	MSTRG.18115	ENSG00000010438	0.84874	0	-9.73088	2.1049e-05
40	XG	MSTRG.39016	ENSG00000124343	3.59352	0.308003	-3.5401	2.28492e-05
41	TMEM14B	MSTRG.12667	ENSG00000137210	26.5706	15.3526	-0.791314	2.345e-05
42	MARCKSL1	MSTRG.836	ENSG00000175130	12.1746	5.34568	-1.18727	2.97124e-05
43	EMILIN1	MSTRG.4252	ENSG00000138080	117.619	60.3394	-0.962938	3.06032e-05
44	PTK7	MSTRG.13162	ENSG00000112655	47.1118	23.5191	-1.00223	4.19273e-05
45	ZYX	MSTRG.16176	ENSG00000159840	105.068	45.4083	-1.21027	5.95257e-05
46	OR7E24	MSTRG.15459	ENSG00000237521	14.8624	6.42492	-1.20979	6.30121e-05
47	MGAT4B	MSTRG.12466	ENSG00000161013	10.9919	6.69705	-0.714764	8.0988e-05
48	HMGA1	MSTRG.12977	ENSG00000137309	205.027	84.2047	-1.28383	8.23697e-05
49	RPL10A	MSTRG.13010	ENSG00000198755	495.795	276.334	-0.843331	9.85586e-05
50	FTH1	MSTRG.22190	ENSG00000167996	4379.89	2549.93	-0.780439	9.85586e-05
51	CUL7	MSTRG.13156	ENSG00000044090	10.666	5.32881	-1.001	9.89293e-05
52	CTXN1	MSTRG.34134	ENSG00000178531	22.5277	7.9538	-1.50187	0.000100603
53	VASP	MSTRG.35646	ENSG00000125753	46.3857	29.4994	-0.652978	0.000118181
54	CNN2	MSTRG.33685	ENSG00000064666	195.323	98.5826	-0.986451	0.000138721
55	ACAA1	MSTRG.7159	ENSG00000060971	22.5901	11.9525	-0.918322	0.000138901
56	RGN	MSTRG.39299	ENSG00000130988	1.27686	0	-10.3195	0.000169079
57	PDLIM4	MSTRG.11721	ENSG00000131435	37.8531	18.3899	-1.04146	0.000175069
58	TLE5	MSTRG.33845	ENSG00000104964	201.672	138.885	-0.538114	0.000178767
59	RPS7	MSTRG.4010	ENSG00000171863	317.39	198.702	-0.675649	0.000180257
60	TXNDC5	MSTRG.12642	ENSG00000239264	96.1783	58.3222	-0.721655	0.000182775
61	CLEC3B	MSTRG.7296	ENSG00000163815	178.638	48.6507	-1.87648	0.000189885
62	FBLIM1	MSTRG.396	ENSG00000162458	26.1139	14.055	-0.893684	0.000196509
63	HDDC2	MSTRG.13792	ENSG00000111906	11.4818	6.7854	-0.758759	0.00020819
64	LINC00269	MSTRG.26299	ENSG00000215162	4.02048	0.856917	-2.22882	0.000210819
65	JAGN1	MSTRG.6864	ENSG00000171135	26.7302	15.0105	-0.832455	0.000211555
66	TFAP2A	MSTRG.12658	ENSG00000137203	7.8682	3.50418	-1.16673	0.000218125
67	FUOM	MSTRG.21307	ENSG00000148803	2.4022	0.915968	-1.39002	0.000223205
68	SOCS1	MSTRG.29442	ENSG00000185338	22.3136	8.0951	-1.46269	0.000231954
69	TMSB4X	MSTRG.9880	ENSG00000205542	405.192	259.913	-0.640573	0.00024576
70	RPL22L1	MSTRG.8607	ENSG00000163584	25.7016	9.30054	-1.46637	0.000249447
71	CCL7	MSTRG.31597	ENSG00000108688	11.8353	1.12084	-3.39928	0.000265234
72	CLDN11	MSTRG.8591	ENSG00000013297	94.1926	35.0391	-1.42662	0.000273324
73	IL32	MSTRG.29308	ENSG00000008517	64.6377	19.4923	-1.72942	0.000289722
74	UQCRC1	MSTRG.7407	ENSG00000010256	79.898	42.6645	-0.905106	0.000289722
75	RAC2	MSTRG.38535	ENSG00000128340	12.72	2.00454	-2.66515	0.000299178
76	HCLS1	MSTRG.8065	ENSG00000180353	4.34243	0	-12.0846	0.000300662
77	PSMG4	MSTRG.12585	ENSG00000180822	2.5596	1.37214	-0.899001	0.000316732
78	SEPTIN9	MSTRG.32734	ENSG00000184640	87.94	66.6758	-0.399352	0.000316732
79	TRB	MSTRG.40892	HGNC:12155	0.775723	0.00218181	-7.93141	0.000353025
80	HSP90AB1	MSTRG.13221	ENSG00000096384	240.37	172.518	-0.478511	0.00035608
81	EIF3F	MSTRG.21590	ENSG00000175390	27.2621	17.9742	-0.600942	0.00036602
82	CAPZB	MSTRG.462	ENSG00000077549	78.1104	58.9986	-0.404826	0.000371208
83	RPL4	MSTRG.28325	ENSG00000174444	470.236	321.983	-0.546397	0.000372309
84	TPBG	gene-TPBG	ENSG00000146242	27.617	11.4163	-1.27439	0.000413372
85	IL27RA	gene-IL27RA	ENSG00000104998	4.75371	1.54459	-1.6212	0.000424408
86	CALR	MSTRG.34485	ENSG00000179218	729.852	460.277	-0.6651	0.0004329
87	PDCD2	MSTRG.14225	ENSG00000071994	5.33613	2.80472	-0.927694	0.00043721
88	MRPL14	MSTRG.13216	ENSG00000180992	20.2601	10.1783	-0.993073	0.000513129
89	LY6G5B	MSTRG.12920	ENSG00000240053	6.47738	2.81808	-1.20041	0.000515074
90	RPL32	MSTRG.6938	ENSG00000144713	181.224	87.3502	-1.05288	0.000545493
91	RPL24	MSTRG.7917	ENSG00000114391	499.809	217.074	-1.20319	0.000601013
92	RPS24	MSTRG.20550	ENSG00000138326	180.593	117.458	-0.620587	0.00066475
93	-	MSTRG.31887	UniProt: O00370	0.703972	0	-9.46142	0.000690254
94	IGF2BP2	MSTRG.8768	ENSG00000073792	3.79388	1.64887	-1.2017	0.000690254
95	RPS12	MSTRG.22823	ENSG00000112306	16.4869	7.27547	-1.1801	0.000724431
96	ACTG1	MSTRG.32852	ENSG00000184009	742.393	462.135	-0.683868	0.000784
97	LAMA2	MSTRG.13808	ENSG00000196569	12.6279	0	-13.6244	0.000809729
98	SEC61A1	MSTRG.8170	ENSG00000058262	211.524	147.834	-0.516845	0.000830364
99	SLC39A7	gene-SLC39A7	ENSG00000112473	15.4547	7.72997	-0.999417	0.000855463
100	RPS15A	MSTRG.29537	ENSG00000134419	129.237	81.7573	-0.660592	0.000880796
101	TEAD3	MSTRG.13015	ENSG00000007866	19.4068	11.866	-0.709678	0.000895199
102	CDA	MSTRG.477	ENSG00000158825	6.1553	0.365644	-4.06961	0.00106189
103	S100A16	MSTRG.2542	ENSG00000188643	79.7858	42.0528	-0.923915	0.00118801
104	SLC20A1	MSTRG.5380	ENSG00000144136	113.25	64.3633	-0.815188	0.0011936
105	CLIC1	gene-CLIC1	ENSG00000213719	29.6107	19.8143	-0.579554	0.00123369
106	DYNLT1	MSTRG.14111	ENSG00000146425	46.2507	21.5952	-1.09873	0.00126562
107	ANO10	MSTRG.7266	ENSG00000160746	4.77896	2.8538	-0.74361	0.00127062
108	HOXD10	MSTRG.5896	ENSG00000128710	10.9954	4.60154	-1.25653	0.00127503
109	SDC4	MSTRG.37098	ENSG00000124145	90.1549	53.7852	-0.745185	0.00144354
110	FLOT2	MSTRG.31433	ENSG00000132589	17.3177	8.21342	-1.0761	0.00150878
111	ACTG2	MSTRG.4905	ENSG00000163017	52.214	11.6223	-2.16745	0.00159516
112	MTMR14	MSTRG.6846	ENSG00000163719	5.99548	3.11267	-0.9455	0.00180423
113	MOXD1	MSTRG.13840	ENSG00000079931	40.8406	20.3279	-1.00651	0.00196914
114	PLAT	MSTRG.16841	ENSG00000104368	84.2463	40.0814	-1.07166	0.00217743
115	RPL27A	MSTRG.14061	ENSG00000166441	98.6127	58.3377	-0.757336	0.00227106
116	ECI2	MSTRG.12609	ENSG00000198721	30.0513	21.5859	-0.477321	0.00230032
117	ATF6B	gene-ATF6B	ENSG00000213676	7.14044	3.56026	-1.00383	0.00234213
118	CDKN1A	MSTRG.13042	ENSG00000124762	346.604	263.238	-0.396921	0.00247014
119	FOXL2	MSTRG.8337	ENSG00000183770	3.66426	1.70888	-1.10003	0.00253776
120	SNRPC	MSTRG.12991	ENSG00000124562	77.2578	50.7534	-0.606165	0.00255895
121	RPS3A	MSTRG.10349	ENSG00000145425	59.4068	42.4088	-0.486253	0.00262936
122	TCF21	MSTRG.13854	ENSG00000118526	1.10817	0.130591	-3.07534	0.00262936
123	RAB7A	MSTRG.8182	ENSG00000075785	110.562	79.0542	-0.483938	0.00267287
124	C6orf89	MSTRG.13048	ENSG00000198663	16.0184	9.97716	-0.682977	0.00274555
125	PIGS	MSTRG.31407	ENSG00000087111	45.7046	28.8693	-0.662788	0.00279826
126	RPL26	MSTRG.31067	ENSG00000161970	307.12	212.261	-0.532962	0.00280836
127	TTYH3	MSTRG.14300	ENSG00000136295	43.661	24.1992	-0.851359	0.00297463
128	RPL29	MSTRG.13756	ENSG00000162244	58.7944	31.7505	-0.888877	0.00299055
129	SH3TC1	MSTRG.9241	ENSG00000125089	0.753474	0	-9.55933	0.00313261
130	S100A6	MSTRG.2523	ENSG00000197956	3232.2	1815.45	-0.832192	0.00332613
131	ACAD9	MSTRG.8190	ENSG00000177646	12.4	7.23224	-0.777739	0.00337616
132	FAM229B	MSTRG.13706	ENSG00000203778	6.92494	3.3251	-1.05818	0.00342921
133	NEU1	MSTRG.40660	ENSG00000204386	4.3054	1.51439	-1.5068	0.00342921
134	RPL21	MSTRG.21169	ENSG00000122026	61.2524	41.7512	-0.55294	0.00350672
135	GALNT6	MSTRG.24311	ENSG00000139629	2.90274	0.128388	-4.48814	0.00372695
136	FAM234A	MSTRG.29050	ENSG00000167930	21.5591	12.2809	-0.811828	0.00388918
137	KLHDC3	MSTRG.13152	ENSG00000124702	20.7416	9.5115	-1.1247	0.00392285
138	RGL2	MSTRG.12950	ENSG00000237441	11.8575	5.55909	-1.09274	0.00393652
139	PSMD2	MSTRG.8730	ENSG00000175166	74.2385	52.0257	-0.512935	0.00395179
140	RPL14	MSTRG.7213	ENSG00000188846	36.7139	19.6335	-0.902973	0.00408358
141	RPL35A	MSTRG.8953	ENSG00000182899	116.79	62.9792	-0.890958	0.00415676
142	RPL5	MSTRG.1763	ENSG00000122406	393.992	296.637	-0.409467	0.00426779
143	FSCN1	MSTRG.14386	ENSG00000075618	108.545	70.9769	-0.612862	0.0043397
144	SRF	MSTRG.13169	ENSG00000112658	17.3255	10.3256	-0.746615	0.00440234
145	TAPBP	MSTRG.40687	ENSG00000231925	17.3817	5.08339	-1.77351	0.00447592
146	EMC3	MSTRG.6880	ENSG00000125037	17.2324	11.6441	-0.565487	0.00459563
147	GAL	MSTRG.22667	ENSG00000069482	4.60337	0.357269	-3.68389	0.00463786
148	RPL22	MSTRG.221	ENSG00000116251	101.435	77.9388	-0.380138	0.00480938
149	GATA2	MSTRG.8174	ENSG00000179348	7.19375	0.459082	-3.96698	0.00480938
150	LMOD1	MSTRG.3279	ENSG00000163431	18.2378	8.42104	-1.11477	0.00530088
151	CDC40	MSTRG.13670	ENSG00000168438	1.63793	0	-10.6785	0.00542066
152	CALM2	MSTRG.35711	ENSG00000143933	193.341	134.093	-0.527913	0.00552555
153	ECE1	MSTRG.492	ENSG00000117298	53.5131	38.5597	-0.472788	0.00554697
154	MRPL18	MSTRG.14133	ENSG00000112110	20.3162	13.1774	-0.624521	0.00564574
155	ACTB	MSTRG.14379	ENSG00000075624	2539.88	1671.94	-0.603242	0.00571849
156	LHPP	MSTRG.21211	ENSG00000107902	2.58835	1.44731	-0.838222	0.00580047
157	TAGLN	MSTRG.23299	ENSG00000149591	430.166	200.031	-1.10466	0.00584234
158	MFAP2	MSTRG.433	ENSG00000117122	17.9144	8.59995	-1.05863	0.00586017
159	TMEM115	MSTRG.7525	ENSG00000126062	43.2356	28.2664	-0.613113	0.00598964
160	NECTIN2	MSTRG.35579	ENSG00000130202	33.9743	23.9028	-0.507243	0.00599251
161	CUX1	MSTRG.15639	ENSG00000257923	2.94568	1.85289	-0.668531	0.00626322
162	LYRM4	MSTRG.12620	ENSG00000214113	4.69864	2.45647	-0.935374	0.00630202
163	TMEM132A	MSTRG.22135	ENSG00000006118	12.7189	5.65439	-1.16939	0.00630202
164	RPSA	MSTRG.7200	ENSG00000168028	416.716	204.394	-1.02771	0.00633318
165	TP53	MSTRG.31010	ENSG00000141510	23.006	16.0046	-0.523495	0.00635606
166	QPCT	MSTRG.4413	ENSG00000115828	38.3679	21.0974	-0.862802	0.00635606
167	FTL	MSTRG.35843	ENSG00000087086	8658.84	4728.54	-0.872777	0.00651426
168	ZFAND3	MSTRG.13061	ENSG00000156639	6.76979	4.17244	-0.698088	0.00660572
169	TSPYL1	MSTRG.13734	ENSG00000189241	13.3865	7.45774	-0.843881	0.00689939
170	DTNBP1	MSTRG.12711	ENSG00000047579	3.96176	2.21621	-0.837758	0.00711478
171	RPS6	MSTRG.18009	ENSG00000137154	633.517	462.571	-0.453708	0.00720198
172	NISCH	MSTRG.7606	ENSG00000010322	13.1821	7.81745	-0.75374	0.007274
173	CCDC167	MSTRG.13058	ENSG00000198937	19.6374	7.92155	-1.30964	0.00736954
174	GCAT	MSTRG.38578	ENSG00000100116	5.43404	1.82419	-1.57424	0.00749929
175	SIDT2	MSTRG.23297	ENSG00000149577	16.5673	11.245	-0.559017	0.00775752
176	QPCTL	MSTRG.35664	ENSG00000011478	11.9274	6.3694	-0.904948	0.00775752
177	BAK1	MSTRG.12957	ENSG00000030110	10.9708	5.95536	-0.8813	0.00908376
178	RSRC1	MSTRG.8497	ENSG00000174891	0.895566	0	-9.80827	0.0093735
179	VARS1	MSTRG.40387	ENSG00000204394	4.5659	1.77708	-1.3609	0.00946652
180	MOGS	MSTRG.4941	ENSG00000115275	37.4211	25.2129	-0.569671	0.00964044
181	RPL9	MSTRG.9414	ENSG00000163682	426.233	288.276	-0.564189	0.00966436
182	RPL9P7		ENSG00000238103
183	RPL9P8		HGNC:30334
184	TTLL3	MSTRG.6859	ENSG00000214021	19.1882	9.36806	-1.03432	0.00977057
185	KRT19	MSTRG.31767	ENSG00000171345	24.2844	7.12408	-1.76911	0.00977836
186	C1QTNF9B	MSTRG.25620	ENSG00000205863	3.57052	1.12242	-1.66864	0.0097789
187	PPARD	MSTRG.13007	ENSG00000112033	4.66789	2.86416	-0.704465	0.0103131
188	TOMM7	MSTRG.14521	ENSG00000196683	561.871	365.166	-0.621684	0.0103422
189	SMIM29	MSTRG.12980	ENSG00000186577	37.8827	24.3445	-0.637921	0.0107098
190	ACKR4	MSTRG.8252	ENSG00000129048	5.04287	2.37613	-1.08531	0.0107098
191	MAGED4	MSTRG.39387	ENSG00000187243	7.41543	2.66858	-1.47411	0.0107117
192	MAGED4B		ENSG00000154545
193	RPL18A	MSTRG.34697	ENSG00000105640	1037.36	634.365	-0.709532	0.0107597
194	CCDC28A	MSTRG.13897	ENSG00000024862	4.06028	1.94284	-1.06303	0.0111068
195	SMPD2	MSTRG.13664	ENSG00000135587	3.09123	1.07222	-1.5267	0.011133
196	MYL9	MSTRG.36964	ENSG00000101335	519.869	246.303	-1.07771	0.0112472
197	RPS2	MSTRG.29205	ENSG00000140988	688.78	454.751	-0.598966	0.0113403
198	SGSH	MSTRG.32801	ENSG00000181523	5.92907	3.26821	-0.859107	0.0115454
199	HOXD12	MSTRG.5894	ENSG00000170178	1.66272	0.0376076	-5.42939	0.0116516
200	CD248	MSTRG.22520	ENSG00000174807	366.502	218.284	-0.747608	0.0116656
201	ABRACL	MSTRG.13903	ENSG00000146386	12.232	7.44927	-0.715408	0.0118215
202	AKT1S1	MSTRG.35950	ENSG00000204673	41.0701	23.1638	-0.826188	0.0123826
203	TCP1	MSTRG.14131	ENSG00000120438	37.0442	24.7224	-0.583412	0.0123873
204	COLGALT1	MSTRG.34686	ENSG00000130309	41.3213	32.2388	-0.358081	0.0123873
205	RPL37A	MSTRG.6357	ENSG00000197756	169.135	111.668	-0.598961	0.0124472
206	UBXN6	MSTRG.33961	ENSG00000167671	41.4466	27.7542	-0.578533	0.0126153
207	BRK1	MSTRG.6892	ENSG00000254999	147.183	99.8917	-0.559169	0.0127465
208	CKAP4	MSTRG.25046	ENSG00000136026	284.071	211.395	-0.42631	0.0128579
209	RPL15	MSTRG.12691	ENSG00000174748	38.2716	19.8251	-0.948911	0.0128941
210	JUND	MSTRG.34722	ENSG00000130522	32.3804	22.3689	-0.533608	0.0129015
211	RPL17	MSTRG.1900	ENSG00000265681	66.3278	44.8258	-0.565275	0.0132465
212	SFRP1	MSTRG.16819	ENSG00000104332	70.7277	27.2463	-1.37618	0.013377
213	RPSA	MSTRG.39643	ENSG00000168028	5.00053	0.374419	-3.73579	0.0134634
214	SQSTM1	MSTRG.12468	ENSG00000161011	194.297	133.083	-0.545933	0.0136591
215	RPS23	MSTRG.11361	ENSG00000186468	86.0653	62.302	-0.466146	0.0137508
216	NT5DC2	MSTRG.7609	ENSG00000168268	27.5874	12.972	-1.08856	0.0137701
217	RPS9	MSTRG.36107	ENSG00000170889	40.4366	21.9682	-0.880214	0.0138078
218	DNPH1	MSTRG.13171	ENSG00000112667	35.2103	20.4339	-0.785003	0.0140364
219	PUF60	MSTRG.17717	ENSG00000179950	7.5358	5.43747	-0.470751	0.0140789
220	ZNF428	MSTRG.35506	ENSG00000131116	34.7406	21.331	-0.703642	0.0141872
221	SH3BGRL2	MSTRG.13479	ENSG00000198478	1.33232	0.075687	-4.11989	0.0144429
222	THOC7	MSTRG.7712	ENSG00000163634	15.1747	9.36123	-0.696839	0.0151723
223	SLC15A3	MSTRG.22136	ENSG00000110446	3.94795	1.69676	-1.21784	0.0152259
224	PXDN	MSTRG.3987	ENSG00000130508	80.1788	33.1814	-1.27282	0.0152259
225	SFT2D1	MSTRG.14167	ENSG00000198818	25.4585	15.7863	-0.689435	0.0153933
226	SUMF1	MSTRG.6817	ENSG00000144455	2.4931	1.46417	-0.767448	0.0154422
227	MOSPD3	MSTRG.15584	ENSG00000106330	17.7174	11.3677	-0.640181	0.0157082
228	TRAM2	MSTRG.13277	ENSG00000065308	57.7097	34.8018	-0.729636	0.0160318
229	RPS2	MSTRG.31314	ENSG00000140988	401.661	294.994	-0.445294	0.0160318
230	SERPINF1	MSTRG.30801	ENSG00000132386	68.365	29.1147	-1.23148	0.0165979
231	NDUFAF3	MSTRG.7439	ENSG00000178057	10.6036	6.27539	-0.756677	0.0167089
232	CAMK1	MSTRG.6852	ENSG00000134072	10.3028	5.67485	-0.860272	0.0169203
233	SPCS1	MSTRG.7616	ENSG00000114902	29.327	20.7546	-0.498779	0.0169579
234	RPL7	MSTRG.17098	ENSG00000147604	243.239	182.936	-0.411033	0.0170698
235	TMEM158	MSTRG.7301	ENSG00000249992	51.1268	27.1055	-0.915473	0.0173542
236	CPA4	MSTRG.15964	ENSG00000128510	7.15498	0.411717	-4.11593	0.0173592
237	POLR1C	MSTRG.13189	ENSG00000171453	7.32981	4.69468	-0.64264	0.0174706
238	SYNJ2	MSTRG.14099	ENSG00000078269	0.520084	0.0159259	-4.94421	0.0177572
239	-	MSTRG.2120	UniProt: P63132	2.49922	0.170957	-3.86193	0.0182591
240			UniProt: Q9WJR5
241	IMPDH1	MSTRG.15902	ENSG00000106348	27.0984	17.7911	-0.607025	0.0183261
242	PLOD1	MSTRG.351	ENSG00000083444	225.963	174.48	-0.373027	0.0186273
243	DEXI	MSTRG.29434	ENSG00000182108	37.655	28.9673	-0.378404	0.018917
244	PTGDS	MSTRG.19598	ENSG00000107317	59.5339	11.7697	-2.33854	0.0189979
245	RPS13	MSTRG.21722	ENSG00000110700	569.386	448.398	-0.344626	0.0193392
246	RPN1	MSTRG.8180	ENSG00000163902	161.389	114.785	-0.491596	0.0198791
247	OAZ2	MSTRG.28265	ENSG00000180304	55.9419	44.3732	-0.334236	0.0200862
248	NDUFB4	MSTRG.8058	ENSG00000065518	29.8302	19.1082	-0.642556	0.0203582
249	USP4	MSTRG.7466	ENSG00000114316	4.3431	2.94118	-0.562171	0.020741
250	BAG6	MSTRG.12916	ENSG00000204463	4.9499	2.86797	-0.787156	0.0208062
251	PEPD	MSTRG.35018	ENSG00000124299	25.082	19.2701	-0.380268	0.0208062
252	DIRAS3	MSTRG.1535	ENSG00000162595	1.82881	0.296227	-2.62206	0.0208597
253	VPS51	MSTRG.22366	ENSG00000149823	21.3397	13.8684	-0.621702	0.0209469
254	EPHB4	MSTRG.15596	ENSG00000196411	15.603	10.8759	-0.520653	0.0210632
255	EBI3	MSTRG.33945	ENSG00000105246	3.55375	1.09626	-1.69584	0.0211009
256	RPS8	MSTRG.1187	ENSG00000142937	711.729	492.334	-0.531689	0.021174
257	DRAM1	MSTRG.24968	ENSG00000136048	56.0461	36.1493	-0.632633	0.021174
258	B4GALT7	MSTRG.12418	ENSG00000027847	8.58175	5.71802	-0.585672	0.0214889
259	SNX3	MSTRG.13639	ENSG00000112335	51.9965	32.7315	-0.667717	0.0214889
260	OAZ1	MSTRG.33791	ENSG00000104904	540.118	401.728	-0.427055	0.0214889
261	PTX3	MSTRG.8493	ENSG00000163661	79.9889	41.79	-0.936624	0.0216977
262	ZBTB22	MSTRG.40511	ENSG00000236104	11.2778	2.79265	-2.01339	0.0222993
263	ANXA2	MSTRG.28156	ENSG00000182718	282.471	223.342	-0.338847	0.0223196
264	HHIPL1	MSTRG.27346	ENSG00000182218	2.2324	0.111326	-4.31348	0.0232055
265	LAMA5	MSTRG.37355	ENSG00000130702	1.75739	1.10375e-05	-10.7642	0.0232055
266	C1orf53	MSTRG.3220	ENSG00000203724	4.05158	2.22258	-0.865957	0.023329
267	TUBB2A	MSTRG.12580	ENSG00000137267	31.8087	20.4572	-0.636788	0.0237497
268	TUBB2B		ENSG00000137285
269	EMC10	MSTRG.35975	ENSG00000161671	17.8288	12.2267	-0.54414	0.0237497
270	SOX4	MSTRG.12745	ENSG00000124766	3.997	1.78033	-1.16632	0.0239282
271	RFTN1	MSTRG.7011	ENSG00000131378	10.1945	5.88984	-0.791382	0.0239853
272	NELFE	gene-NELFE-3	ENSG00000204356	4.36106	1.9701	-1.14601	0.0240657
273	ZNF318	MSTRG.13174	ENSG00000171467	1.04786	0	-10.0346	0.024379
274	MAN1B1	MSTRG.19613	ENSG00000177239	55.3698	37.4532	-0.564001	0.0246964
275	RPL19	MSTRG.31686	ENSG00000108298	467.177	325.214	-0.522578	0.0247823
276	HOXD13	MSTRG.5890	ENSG00000128714	0.819906	0.122716	-2.73018	0.0247823
277	TMEM44	MSTRG.8842	ENSG00000145014	1.64618	0.400346	-2.03709	0.025104
278	DUSP22	MSTRG.12521	ENSG00000112679	4.35115	2.78928	-0.64132	0.0254786
279	FAM86C1P	MSTRG.41676	ENSG00000158483	1.23466	0.339072	-1.86137	0.0255752
280	PTRHD1	MSTRG.4202	ENSG00000184924	18.1692	11.2635	-0.689791	0.0256403
281	AGPAT1	MSTRG.12936	ENSG00000204310	10.4761	7.02223	-0.577036	0.0257091
282	PDE9A	MSTRG.37773	ENSG00000160191	1.31371	0.10489	-3.63411	0.0260426
283	GTF2H5	MSTRG.14103	ENSG00000272047	4.96439	2.71496	-0.870445	0.0260829
284	BEND6	MSTRG.13323	ENSG00000151917	0.922555	0.116662	-2.97254	0.0262034
285	TSPAN5	MSTRG.9892	ENSG00000168785	39.3376	27.4749	-0.517777	0.0262697
286	MCRIP1	gene-MCRIP1	ENSG00000225663	42.9945	26.0099	-0.725069	0.0262697
287	MYO1C	MSTRG.30790	ENSG00000197879	37.398	30.3289	-0.302256	0.0270737
288	ITM2C	MSTRG.6542	ENSG00000135916	42.3799	25.6302	-0.72551	0.0276944
289	FYN	MSTRG.13704	ENSG00000010810	1.49645	0.832835	-0.844676	0.0290045
290	LASP1	MSTRG.31677	ENSG00000002834	174.663	142.529	-0.293316	0.0291245
291	BAP18	MSTRG.30969	ENSG00000258315	71.5858	44.0132	-0.701723	0.0293667
292	JUP	MSTRG.31779	ENSG00000173801	1.58217	0.0339464	-5.50153	0.0293667
293	NCLN	MSTRG.33855	ENSG00000125912	48.7313	35.0416	-0.475767	0.0294312
294	FLOT1	gene-FLOT1	ENSG00000137312	8.00402	4.87156	-0.716225	0.0294312
295	MRPS18A	MSTRG.13205	ENSG00000096080	18.5551	11.6554	-0.670763	0.0294649
296	SAT2	MSTRG.31007	ENSG00000141504	32.5832	22.5315	-0.532166	0.0295263
297	RPS27	MSTRG.23289	ENSG00000177954	20.6983	13.6951	-0.595817	0.0304574
298	CORIN	MSTRG.9466	ENSG00000145244	42.4729	17.9102	-1.24571	0.0311122
299	RPSA	MSTRG.24704	ENSG00000168028	74.688	32.5461	-1.19837	0.0315689
300	MAP4	MSTRG.7372	ENSG00000047849	38.2552	29.1381	-0.392737	0.0315689
301	MEA1	MSTRG.13150	ENSG00000124733	35.4359	22.0569	-0.683957	0.0315935
302	DOK1	MSTRG.4955	ENSG00000115325	7.31035	4.28336	-0.771059	0.0323645
303	RPL31	MSTRG.5250	ENSG00000071082	109.599	80.0551	-0.453171	0.0326289
304	TUBB	gene-TUBB	ENSG00000196230	51.4993	34.1994	-0.590568	0.0329166
305	CHCHD6	MSTRG.8146	ENSG00000159685	7.20206	4.13956	-0.798785	0.0332274
306	PPP1R18	gene-PPP1R18-2	ENSG00000146112	4.59552	2.23335	-1.04069	0.0332274
307	RPS14	MSTRG.12098	ENSG00000164587	193.36	135.496	-0.513035	0.0336102
308	RWDD1	MSTRG.13743	ENSG00000111832	6.57814	4.09713	-0.682931	0.0344488
309	MEST	MSTRG.15967	ENSG00000106484	23.0829	2.99643	-2.94509	0.0351212
310	RPS28	MSTRG.22936	ENSG00000233927	18.558	10.1475	-0.870848	0.0351212
311	FKBP8	MSTRG.34741	ENSG00000105701	194.689	133.475	-0.5446	0.0351212
312	KDELR1	MSTRG.35796	ENSG00000105438	236.438	180.43	-0.390024	0.0351346
313	RDH5	MSTRG.24458	ENSG00000135437	2.98326	1.45191	-1.03843	0.0351356
314	PRAC1	MSTRG.32160	ENSG00000159182	2.75589	0.28382	-3.27492	0.0352138
315	ACTRT3	MSTRG.8576	ENSG00000184378	1.9118	0.51676	-1.88533	0.0363187
316	NHERF1	MSTRG.32617	ENSG00000109062	8.45005	5.41926	-0.640769	0.0363933
317	PCBP4	MSTRG.7568	ENSG00000090097	23.5476	12.0668	-0.964474	0.0363933
318	UQCC2	MSTRG.12962	ENSG00000137288	26.6882	15.0061	-0.830609	0.0364896
319	RPL34	MSTRG.9978	ENSG00000109475	226.332	144.168	-0.650683	0.0369549
320	EIF4B	MSTRG.24359	ENSG00000063046	77.2007	55.1375	-0.485571	0.0369772
321	RPL18	MSTRG.35804	ENSG00000063177	706.41	456.454	-0.630036	0.0378135
322	PPP1CA	MSTRG.22607	ENSG00000172531	94.0237	72.1713	-0.381594	0.0382972
323	GPX4	MSTRG.33697	ENSG00000167468	287.935	172.788	-0.736737	0.0385224
324	PRRC2A	MSTRG.40536	ENSG00000204469	4.03408	1.15835	-1.79928	0.0386279
325	EEF1G	MSTRG.16016	ENSG00000254772	69.3091	43.3892	-0.675697	0.0386909
326	RPS3	MSTRG.22851	ENSG00000149273	341.588	239.066	-0.514845	0.039141
327	RGCC	MSTRG.25796	ENSG00000102760	126.045	56.3609	-1.16116	0.0399519
328	TNFRSF19	MSTRG.25617	ENSG00000127863	5.14363	0.334699	-3.93783	0.0402457
329	RTEL1	MSTRG.37415	ENSG00000258366	2.83277	1.32094	-1.10006	0.0407066
330	NECAP2	MSTRG.417	ENSG00000157191	25.405	19.8563	-0.355497	0.0407228
331	OAF	MSTRG.23387	ENSG00000184232	36.0826	25.1156	-0.5227	0.0409737
332	RPL37	MSTRG.10877	ENSG00000145592	47.5569	34.7932	-0.450837	0.0411173
333	P3H4	MSTRG.31780	ENSG00000141696	15.493	10.0905	-0.618574	0.0411173
334	EEF1B2	gene-EEF1B2	ENSG00000114942	99.9579	73.9651	-0.43447	0.0411173
335	PDLIM7	MSTRG.12405	ENSG00000196923	106.639	63.5702	-0.746298	0.0414526
336	HDAC2	MSTRG.13721	ENSG00000196591	4.8482	3.25309	-0.575493	0.0415882
337	RPS20	MSTRG.16937	ENSG00000008988	223.962	158.305	-0.500547	0.0419961
338	ICAM2	MSTRG.32473	ENSG00000108622	0.915803	0	-9.84047	0.04201
339	MTHFD1L	MSTRG.14030	ENSG00000120254	1.41692	0.855609	-0.727068	0.0435442
340	RHOA	MSTRG.7474	ENSG00000067560	258.861	198.885	-0.380239	0.0436745
341	VPS52	MSTRG.40551	ENSG00000223501	3.48107	1.56722	-1.15082	0.0437199
342	ISY1	MSTRG.8198	ENSG00000240682	5.76315	3.99437	-0.528779	0.0457117
343	SLC39A4	gene-SLC39A4	ENSG00000147804	1.81752	0.970299	-0.904773	0.0464526
344	TPM2	MSTRG.18209	ENSG00000198467	533.915	203.962	-1.38831	0.0464861
345	RGS2	MSTRG.3182	ENSG00000116741	7.49834	3.52492	-1.08876	0.0464861
346	PCSK7	MSTRG.23294	ENSG00000160613	14.9577	7.09419	-1.07607	0.0466151
347	CHPF2	MSTRG.16325	ENSG00000033100	28.7415	20.8931	-0.460085	0.046941
348	COX7A2	MSTRG.13436	ENSG00000112695	11.1991	3.99299	-1.48761	0.0473003
349	CCDC92	MSTRG.25442	ENSG00000119242	1.62008	1.14911	-0.495177	0.0477585
350	GALNT2	MSTRG.3710	ENSG00000143641	6.93648	5.42259	-0.355164	0.0485523
351	TUSC2	MSTRG.7518	ENSG00000114383	17.2696	12.0032	-0.524779	0.0490908
352	SEC13	MSTRG.6906	ENSG00000157020	51.1842	34.6165	-0.564225	0.0492602
353	ARF5	MSTRG.15887	ENSG00000004059	85.6573	56.9212	-0.5896	0.0493822

## Sheet: YvsO(O↑)
	Supplementary Table S3E.
	Differentially expressed genes (DEGs) in normal human dermal fibroblasts (NHDFs) (padj < 0.05).
	Gene name	MSTRG ID	Ensembl ID	avg. RPKM		log2FC	padj
				young	old
1	SOD3	MSTRG.9359	ENSG00000109610	25.3053	707.834	4.80584	8.9138e-38
2	BMP4	MSTRG.26764	ENSG00000125378	5.84385	48.6238	3.05646	9.02899e-27
3	FMOD	MSTRG.3319	ENSG00000122176	4.78112	62.234	3.70201	1.84989e-26
4	TMEM176B	MSTRG.16293	ENSG00000106565	1.6524	144.739	6.45189	6.81607e-25
5	TXNIP	MSTRG.2266	ENSG00000265972	28.8598	239.873	3.0551	1.61704e-22
6	COL15A1	MSTRG.18804	ENSG00000204291	0	50.8017	15.6326	1.8221e-22
7	CRYAB	MSTRG.23224	ENSG00000109846	24.8634	87.3642	1.81298	2.78379e-22
8	IFI6	MSTRG.718	ENSG00000126709	26.3056	1030.94	5.2924	7.46728e-21
9	LGALS3BP	MSTRG.32777	ENSG00000108679	32.5222	167.676	2.36615	3.74413e-20
10	EPHX1	MSTRG.3598	ENSG00000143819	15.7133	38.4013	1.28912	7.34068e-20
11	CCND2	MSTRG.23623	ENSG00000118971	9.29007	84.9393	3.19253	9.48064e-20
12	MSC	MSTRG.17072	ENSG00000178860	2.42424	19.7333	3.0245	9.59282e-20
13	FABP4	MSTRG.17160	ENSG00000170323	2.22385	22.012	3.30657	6.53394e-18
14	CKB	MSTRG.27504	ENSG00000166165	6.64299	33.702	2.34276	2.84942e-17
15	CTSC	MSTRG.23009	ENSG00000109861	20.2427	60.8624	1.5881	2.17069e-16
16	CTSH	MSTRG.28644	ENSG00000103811	1.03493	13.1934	3.67092	3.63424e-16
17	CPQ	MSTRG.17281	ENSG00000104324	16.001	45.8067	1.51734	4.90844e-16
18	SYT11	MSTRG.2660	ENSG00000132718	3.18437	18.1495	2.51048	5.70941e-16
19	COMP	MSTRG.34757	ENSG00000105664	0	29.6654	14.8565	5.74846e-16
20	TMEM59	MSTRG.1377	ENSG00000116209	14.3795	34.8238	1.276	8.91867e-16
21	BST2	MSTRG.34668	ENSG00000130303	1.53692	290.634	7.56209	1.96638e-15
22	SEMA3C	MSTRG.15329	ENSG00000075223	2.54123	35.0252	3.78427	2.03714e-15
23	C1S	MSTRG.23766	ENSG00000182326	22.0782	165.592	2.90688	2.50146e-15
24	NIBAN1	MSTRG.3157	ENSG00000135842	0	8.57812	13.0666	5.26242e-15
25	PDE1A	MSTRG.6016	ENSG00000115252	0	2.21331	11.1126	8.0285e-15
26	PARP9	MSTRG.8078	ENSG00000138496	0	6.58532	12.6853	1.42363e-14
27	CPE	MSTRG.10427	ENSG00000109472	2.65191	29.9173	3.49538	9.2458e-14
28	TNFRSF11B	MSTRG.17482	ENSG00000164761	31.496	143.597	2.18875	1.18414e-13
29	MFGE8	MSTRG.28802	ENSG00000140545	56.5685	115.612	1.03121	4.93048e-13
30	EBF4	MSTRG.36482	ENSG00000088881	0	3.63865	11.8296	1.40946e-12
31	HSPB7	MSTRG.404	ENSG00000173641	2.71657	16.5161	2.60357	1.45968e-12
32	CCPG1	MSTRG.28081	ENSG00000260916	1.37611	9.3855	2.76894	1.56954e-12
33	KPRP	MSTRG.2518	ENSG00000203786	0.390328	87.7522	7.80893	1.81051e-12
34	CREG1	MSTRG.2887	ENSG00000143162	7.80431	32.2856	2.04841	2.22736e-12
35	ID3	gene-ID3	ENSG00000117318	1.54601	24.4312	3.98123	3.96739e-12
36	SERPING1	MSTRG.22060	ENSG00000149131	19.4714	60.4651	1.63469	4.1736e-12
37	TEKT4	MSTRG.40343	ENSG00000163060	0.649846	3.45502	2.40872	6.53161e-12
38	PLBD1	MSTRG.23913	ENSG00000121316	0.225681	9.75681	5.42782	6.76303e-12
39	PDE1C	MSTRG.14695	ENSG00000154678	0.0011537	0.579709	8.07485	6.89961e-12
40	MAN1C1	MSTRG.619	ENSG00000117643	0	4.80436	12.2304	6.89961e-12
41	IFIT1	MSTRG.20682	ENSG00000185745	0.743449	41.9153	5.81519	1.06073e-11
42	COLEC10	MSTRG.17484	ENSG00000184374	0.0855338	9.52827	6.78296	1.8699e-11
43	SNRPN	MSTRG.27621	ENSG00000128739	7.28238	15.3955	1.07992	1.9073e-11
44	GPR68	MSTRG.27258	ENSG00000119714	1.14411	4.86186	2.08631	1.91461e-11
45	EFEMP1	MSTRG.4671	ENSG00000115380	16.3904	74.5273	2.18485	2.16864e-11
46	SCD5	MSTRG.9783	ENSG00000145284	2.61322	16.1595	2.62802	2.71951e-11
47	CHPF	MSTRG.6455	ENSG00000123989	68.136	137.874	1.01685	2.75209e-11
48	LINC00269	MSTRG.22996	ENSG00000215162	21.679	67.1537	1.63112	4.84157e-11
49	IGFBP3	MSTRG.14912	ENSG00000146674	11.8363	217.537	4.19986	6.11495e-11
50	VKORC1	MSTRG.29883	ENSG00000167397	193.444	369.692	0.934406	7.57296e-11
51	LHFPL6	MSTRG.25765	ENSG00000183722	48.1443	117.965	1.2929	7.75919e-11
52	CIART	MSTRG.2390	ENSG00000159208	0.933475	5.93215	2.66657	8.8879e-11
53	PRELP	MSTRG.3320	ENSG00000188783	1.89093	13.1481	2.79704	9.92236e-11
54	LRATD1	MSTRG.4093	ENSG00000162981	2.29108	11.17	2.28503	1.08579e-10
55	SLITRK1	MSTRG.26049	ENSG00000178235	0.112511	5.19218	5.51572	1.10465e-10
56	FAM89A	MSTRG.3734	ENSG00000182118	1.54362	12.7324	3.04329	1.64709e-10
57	FAM43A	MSTRG.8846	ENSG00000185112	7.87519	19.4628	1.30523	1.73046e-10
58	ECM1	MSTRG.2399	ENSG00000143369	77.0359	179.457	1.22002	2.17217e-10
59	ATP10D	MSTRG.9464	ENSG00000145246	0.0355162	6.09006	7.38201	2.71349e-10
60	BTG2	MSTRG.3316	ENSG00000159388	6.71576	21.2642	1.66266	3.10012e-10
61	SNX18	MSTRG.40434	ENSG00000178996	0.258385	7.81469	4.91321	3.15146e-10
62	LBH	MSTRG.4334	ENSG00000213626	8.57194	27.361	1.67431	3.65924e-10
63	LURAP1L	MSTRG.17928	ENSG00000153714	3.80953	12.3418	1.69561	3.70322e-10
64	SULF1	MSTRG.17056	ENSG00000137573	0	7.37079	12.8478	3.96113e-10
65	KLF10	MSTRG.17378	ENSG00000155090	2.86239	14.4977	2.34013	4.03488e-10
66	HSPB8	MSTRG.25275	ENSG00000152137	4.57742	26.6754	2.54264	4.03488e-10
67	PLXDC2	MSTRG.19905	ENSG00000120594	0.0156387	3.97607	7.90102	5.39495e-10
68	CPZ	MSTRG.9248	ENSG00000109625	6.2516	30.8278	2.30175	6.10395e-10
69	HGF	MSTRG.15333	ENSG00000019991	0.359623	13.5979	5.23686	6.43968e-10
70	OAS2	MSTRG.25186	ENSG00000111335	0.0124728	20.3885	10.5636	6.43968e-10
71	GPNMB	MSTRG.14548	ENSG00000136235	49.6771	188.443	1.92346	6.56114e-10
72	RDH10	MSTRG.17100	ENSG00000121039	0.265069	7.04945	4.72784	6.95906e-10
73	GRP	MSTRG.33392	ENSG00000134443	1.74053	19.0964	3.45495	1.05379e-09
74	PARP14	MSTRG.8081	ENSG00000173193	0	11.8343	13.5308	1.05379e-09
75	PLIN2	MSTRG.18004	ENSG00000147872	22.3078	44.5563	0.998046	1.16897e-09
76	SLC1A1	MSTRG.17870	ENSG00000106688	0.133913	5.12755	5.24845	1.38774e-09
77	CYBRD1	MSTRG.5851	ENSG00000071967	15.5117	82.9353	2.41856	1.38774e-09
78	HSD17B2	MSTRG.30481	ENSG00000086696	7.08685	41.6873	2.55622	1.40937e-09
79	C1orf198	MSTRG.3728	ENSG00000119280	20.5018	45.6412	1.15455	1.53848e-09
80	RTN3	MSTRG.22262	ENSG00000133318	9.07785	16.6507	0.875089	1.79347e-09
81	UBE2L6	MSTRG.22059	ENSG00000156587	33.1419	110.44	1.73651	1.83857e-09
82	IGFBP7	MSTRG.9596	ENSG00000163453	74.7549	273.931	1.87356	1.83857e-09
83	SCPEP1	MSTRG.32303	ENSG00000121064	11.8961	42.1835	1.82611	2.01374e-09
84	SMO	MSTRG.15943	ENSG00000128602	0.200387	5.97541	4.89124	2.33364e-09
85	SLCO3A1	MSTRG.28879	ENSG00000176463	0.681068	4.41724	2.69548	2.35941e-09
86	FGF2	MSTRG.10147	ENSG00000138685	3.2136	13.0579	2.02232	2.71321e-09
87	KCNMA1	MSTRG.20531	ENSG00000156113	0.80504	3.91461	2.28031	2.81517e-09
88	H2BC14	MSTRG.12783	ENSG00000273703	3.5255	9.52934	1.43429	2.99632e-09
89	DHRS7	MSTRG.26849	ENSG00000100612	25.9673	58.3819	1.16879	4.51741e-09
90	P4HA3	MSTRG.22817	ENSG00000149380	1.73535	8.95723	2.36716	4.88706e-09
91	TSPAN15	MSTRG.20380	ENSG00000099282	0.345641	2.58608	2.89981	5.50827e-09
92	DTX4	MSTRG.22114	ENSG00000110042	0.404966	19.2874	5.57023	6.17521e-09
93	ALDH3A1	MSTRG.31322	ENSG00000108602	0.697913	16.0119	4.51798	6.17521e-09
94	GALNT5	MSTRG.5716	ENSG00000136542	3.55967	13.8588	1.96068	6.17521e-09
95	CGREF1	MSTRG.4255	ENSG00000138028	0	1.95622	10.9346	7.84913e-09
96	C1orf54	MSTRG.2388	ENSG00000118292	1.44614	10.0076	2.78997	7.9263e-09
97	TLE4	MSTRG.18515	ENSG00000106829	3.82318	11.694	1.61266	9.59646e-09
98	CAD	MSTRG.4262	ENSG00000084774	10.9527	19.0408	0.797757	1.02341e-08
99	ALDH3A2	MSTRG.31318	ENSG00000072210	2.7606	10.773	1.96398	1.06488e-08
100	TNS1	MSTRG.6375	ENSG00000079308	0	4.93368	12.2687	1.16406e-08
101	DCN	MSTRG.24860	ENSG00000011465	43.341	194.629	2.1669	1.20234e-08
102	IFI27	MSTRG.27291	ENSG00000165949	0.420526	32.9005	6.28639	1.56157e-08
103	BDNF	MSTRG.21805	ENSG00000176697	1.8983	5.86747	1.62752	1.80527e-08
104	IFIT3	MSTRG.20680	ENSG00000119917	2.81042	66.5824	4.56579	1.81638e-08
105	CROT	MSTRG.15354	ENSG00000005469	0.255272	3.39396	3.72765	1.93652e-08
106	GAA	MSTRG.32797	ENSG00000171298	3.84794	10.5044	1.44859	2.18698e-08
107	MGST2	MSTRG.10254	ENSG00000085871	1.27849	3.45749	1.43457	2.32389e-08
108	CCDC184	MSTRG.24182	ENSG00000177875	0.438577	5.81024	3.72466	2.87868e-08
109	ELN	MSTRG.15167	ENSG00000049540	0.830521	118.272	7.15215	2.89747e-08
110	CCL5	gene-CCL5	ENSG00000271503	0.0227354	4.90159	7.69036	3.47293e-08
111	ACKR3	MSTRG.6627	ENSG00000144476	0.531036	15.9713	4.90791	3.73095e-08
112	HAAO	MSTRG.4490	ENSG00000162882	0.947015	6.30253	2.73318	3.82318e-08
113	SNCA	MSTRG.9872	ENSG00000145335	0.6946	3.21835	2.21044	4.19617e-08
114	IFIH1	MSTRG.5774	ENSG00000115267	0	6.89342	12.7512	4.46661e-08
115	GALNT16	MSTRG.27004	ENSG00000100626	0	1.74619	10.7708	5.63815e-08
116	MDK	MSTRG.21973	ENSG00000110492	50.0791	137.627	1.45847	6.1578e-08
117	ZFAND5	MSTRG.18455	ENSG00000107372	8.63467	20.5108	1.24808	6.37968e-08
118	CALD1	MSTRG.16035	ENSG00000122786	88.3515	202.477	1.19642	6.97014e-08
119	CEND1	MSTRG.21389	ENSG00000184524	1.12407	6.24947	2.47396	7.46116e-08
120	TSC22D1	MSTRG.25825	ENSG00000102804	3.01157	8.09077	1.42546	7.59237e-08
121	CASP1	MSTRG.23146	ENSG00000137752	5.67137	34.4148	2.60104	7.6451e-08
122	OAS1	MSTRG.25184	ENSG00000089127	0	28.2599	14.7865	7.90671e-08
123	IFITM10	MSTRG.21425	ENSG00000244242	0.101845	5.02744	5.61157	7.93119e-08
124	CDH6	MSTRG.10756	ENSG00000113361	0	4.0191	11.973	7.96057e-08
125	CYTL1	MSTRG.9160	ENSG00000170891	1.22773	12.0409	3.29283	8.10413e-08
126	TMEM130	MSTRG.15476	ENSG00000166448	0.0995351	6.84511	6.08951	8.32445e-08
127	TMEM140	MSTRG.16045	ENSG00000146859	0.64298	4.47535	2.79724	8.99284e-08
128	PTN	MSTRG.16083	ENSG00000105894	6.50144	29.6982	2.19137	9.51542e-08
129	APCDD1	MSTRG.33086	ENSG00000154856	33.7444	190.962	2.50053	9.94374e-08
130	SYT17	MSTRG.29556	ENSG00000103528	0	1.60159	10.6462	1.14702e-07
131	GPC6	MSTRG.26068	ENSG00000183098	0	2.30765	11.1728	1.19371e-07
132	INHBB	MSTRG.5475	ENSG00000163083	2.36796	9.76872	2.04406	1.38772e-07
133	CPXM1	MSTRG.36483	ENSG00000088882	0.940116	11.3896	3.59733	1.47096e-07
134	DDX60	MSTRG.10435	ENSG00000137628	0	4.90881	12.2615	1.50191e-07
135	TNFRSF10C	MSTRG.16599	ENSG00000173535	1.2964	7.36296	2.50486	1.50191e-07
136	TCEA3	MSTRG.544	ENSG00000204219	1.22668	4.95418	2.013	1.50191e-07
137	SUGCT	MSTRG.14800	ENSG00000175600	0.431952	1.37964	1.67306	1.63727e-07
138	CYP1B1	MSTRG.4438	ENSG00000138061	4.57432	26.4655	2.53222	1.67354e-07
139	EPHX2	MSTRG.16655	ENSG00000120915	0.00507237	1.34923	7.79673	1.68558e-07
140	GAL3ST4	MSTRG.15547	ENSG00000197093	4.16834	13.7226	1.71876	1.94039e-07
141	EIF2AK2	MSTRG.4408	ENSG00000055332	0.256817	13.899	5.75259	1.96679e-07
142	SNAP25	MSTRG.36618	ENSG00000132639	0.214011	2.12594	3.3063	2.46723e-07
143	REC8	MSTRG.26471	ENSG00000100918	0.451207	3.9659	3.13296	2.48729e-07
144	GAS1	MSTRG.18562	ENSG00000180447	6.49573	21.8633	1.75079	2.62015e-07
145	GPAT2	MSTRG.5146	ENSG00000186281	1.46237	5.13783	1.81214	2.64494e-07
146	ITM2B	MSTRG.25884	ENSG00000136156	11.4142	28.295	1.30965	2.87934e-07
147	PLPP1	MSTRG.10990	ENSG00000067113	20.6582	40.2415	0.961934	2.91899e-07
148	OLFML1	MSTRG.21582	ENSG00000183801	0.615756	4.10036	2.73333	2.98898e-07
149	SDC2	MSTRG.17278	ENSG00000169439	2.16351	5.10354	1.23774	3.09034e-07
150	ISCU	MSTRG.25077	ENSG00000136003	19.5126	32.0381	0.71535	3.09034e-07
151	KLKB1	MSTRG.10571	ENSG00000164344	0.0811825	2.54647	4.95409	3.21205e-07
152	PARD6G	MSTRG.33585	ENSG00000178184	0.254447	3.51431	3.78255	3.80964e-07
153	LRATD2	MSTRG.17567	ENSG00000168672	0.072234	3.23428	5.46523	4.27022e-07
154	HEXB	MSTRG.11234	ENSG00000049860	38.8333	96.0357	1.30625	4.36881e-07
155	SLC22A17	MSTRG.26447	ENSG00000092096	4.2113	12.6324	1.58457	4.50955e-07
156	RNASE4	MSTRG.26319	ENSG00000258818	2.49915	6.73726	1.43036	4.54989e-07
157	RAMP1	MSTRG.6680	ENSG00000132329	1.15891	15.2164	3.71364	4.54989e-07
158	E2F7	MSTRG.24783	ENSG00000165891	0	4.47745	12.1288	4.61569e-07
159	HOXA11	MSTRG.14619	ENSG00000005073	8.64431	19.5068	1.17406	4.65253e-07
160	FAXDC2	MSTRG.12190	ENSG00000170271	0.370683	4.35274	3.55011	4.8291e-07
161	IL13RA2	MSTRG.39852	ENSG00000123496	0.0478492	16.7158	8.41874	5.10701e-07
162	PSAP	MSTRG.20421	ENSG00000197746	269.868	401.35	0.572604	5.24841e-07
163	CEBPD	MSTRG.16870	ENSG00000221869	15.2592	31.0412	1.02446	5.4609e-07
164	TMEM176A	MSTRG.16295	ENSG00000002933	2.77079	110.154	5.31257	5.52663e-07
165	THBS1	MSTRG.27764	ENSG00000137801	147.173	424.674	1.52883	5.74562e-07
166	C3orf80	MSTRG.8526	ENSG00000180044	0.0694326	3.53441	5.64949	5.93361e-07
167	IFI44	MSTRG.1626	ENSG00000137965	0.0140625	4.21217	8.1278	6.15682e-07
168	MLLT11	MSTRG.2462	ENSG00000213190	4.22274	11.1139	1.3959	6.20702e-07
169	ZNF503	MSTRG.20522	ENSG00000165655	0.510425	5.10447	3.31945	6.28206e-07
170	STOM	MSTRG.19104	ENSG00000148175	18.1162	73.9117	2.02846	6.69017e-07
171	ITGA11	MSTRG.28377	ENSG00000137809	0.335795	5.4034	4.00419	6.80544e-07
172	FAIM2	MSTRG.24265	ENSG00000135472	0.0525018	2.69092	5.65291	6.84969e-07
173	APLP2	MSTRG.23516	ENSG00000084234	57.5964	140.393	1.28541	7.48931e-07
174	GPR37	MSTRG.15879	ENSG00000170775	0.0451181	2.96658	6.00781	7.51839e-07
175	ATP6V0E1	MSTRG.12312	ENSG00000113732	127.644	223.369	0.807301	8.393e-07
176	PDCD4	MSTRG.21065	ENSG00000150593	7.74437	18.525	1.25814	8.69566e-07
177	MGP	MSTRG.23934	ENSG00000111341	0.377558	13.5742	5.16431	8.69566e-07
178	EMB	MSTRG.10948	ENSG00000170571	0	4.99335	12.2861	9.13997e-07
179	NALF1	MSTRG.26176	ENSG00000204442	0.449176	4.87525	3.43721	9.15527e-07
180	CCDC102B	MSTRG.33440	ENSG00000150636	0.455869	3.72405	3.02741	9.87069e-07
181	LRRN4CL	MSTRG.22223	ENSG00000177363	9.40179	21.5138	1.19417	1.05824e-06
182	ISM1	MSTRG.36626	ENSG00000101230	0.0340426	4.36221	6.96014	1.05824e-06
183	HM13	MSTRG.36785	ENSG00000101294	49.8005	68.0521	0.45047	1.14851e-06
184	TMEM204	MSTRG.29172	ENSG00000131634	3.93943	10.5722	1.42399	1.21106e-06
185	PDE2A	MSTRG.22778	ENSG00000186642	0.0788051	2.19839	4.78448	1.28561e-06
186	DDX60L	MSTRG.10442	ENSG00000181381	0.00820791	6.09247	9.37017	1.34386e-06
187	HOXA9	MSTRG.14612	ENSG00000078399	2.53375	4.93842	0.962496	1.34386e-06
188	SARAF	MSTRG.16693	ENSG00000133872	66.4677	115.823	0.801192	1.40224e-06
189	EXTL2	MSTRG.1867	ENSG00000162694	4.27483	11.2301	1.39322	1.42233e-06
190	CHAC1	MSTRG.27843	ENSG00000128965	26.9087	59.5325	1.14558	1.42233e-06
191	DNAJB9	MSTRG.15771	ENSG00000128590	5.82894	19.872	1.76926	1.44894e-06
192	IFIT2	MSTRG.20679	ENSG00000119922	0.154743	15.0579	6.59531	1.45756e-06
193	RNF114	MSTRG.37192	ENSG00000124226	22.574	44.6402	0.983648	1.45756e-06
194	INSC	MSTRG.21710	ENSG00000188487	0.125549	3.51985	4.79816	1.552e-06
195	TBC1D2	MSTRG.18794	ENSG00000095383	3.93943	10.3954	1.39966	1.63416e-06
196	CSF1	MSTRG.1946	ENSG00000184371	14.2599	32.3624	1.1823	1.63416e-06
197	HOXC10	MSTRG.24411	ENSG00000180818	11.0221	16.9549	0.621251	1.71103e-06
198	SPRY1	MSTRG.10154	ENSG00000164056	0.682849	4.19035	2.61567	1.83259e-06
199	NEDD4	MSTRG.28093	ENSG00000069869	0	4.07059	11.9914	1.91063e-06
200	ISG15	MSTRG.52	ENSG00000187608	20.0151	212.801	3.41028	2.03587e-06
201	RAB38	MSTRG.23006	ENSG00000123892	0.281582	1.3441	2.25097	2.0803e-06
202	UCHL1	MSTRG.9438	ENSG00000154277	129.673	235.38	0.860112	2.14005e-06
203	SLC7A11	MSTRG.10212	ENSG00000151012	5.58219	21.0696	1.91607	2.14504e-06
204	B2M	MSTRG.27957	ENSG00000166710	485.248	1488.41	1.61698	2.18838e-06
205	BMP2	MSTRG.36601	ENSG00000125845	1.69335	9.36663	2.46696	2.27714e-06
206	ASPN	MSTRG.18632	ENSG00000106819	0.154084	4.75633	4.93903	2.29385e-06
207	SLC47A1	MSTRG.31317	ENSG00000142494	0	3.65217	11.8349	2.29385e-06
208	GREM2	MSTRG.3844	ENSG00000180875	0.122218	5.65559	5.52065	2.29385e-06
209	HNRNPUL2	MSTRG.22230	ENSG00000214753	22.4717	29.2542	0.380519	2.39372e-06
210	BTG1	MSTRG.24864	ENSG00000133639	5.87132	22.4281	1.93337	2.78407e-06
211	SUMF2	MSTRG.14975	ENSG00000129103	34.8918	56.0898	0.684835	2.86304e-06
212	SGCB	MSTRG.9527	ENSG00000163069	14.6047	28.2692	0.952751	2.86304e-06
213	GABARAPL1	MSTRG.23840	ENSG00000139112	22.0493	39.2897	0.833391	2.868e-06
214	OSGEPL1	MSTRG.6073	ENSG00000128694	0.0529243	1.51877	4.81677	2.88735e-06
215	PCDH18	MSTRG.10208	ENSG00000189184	15.8594	48.9598	1.6262	2.92667e-06
216	RAB29	MSTRG.3371	ENSG00000117280	3.21989	9.20397	1.51495	3.03003e-06
217	IL20RB	MSTRG.8301	ENSG00000174564	2.07972	5.65725	1.44327	3.06288e-06
218	ABI3BP	MSTRG.7903	ENSG00000154175	0	1.67623	10.7119	3.18355e-06
219	RAB27B	MSTRG.33354	ENSG00000041353	0	5.21976	12.35	3.28548e-06
220	CALCOCO2	MSTRG.32164	ENSG00000136436	11.5241	21.7296	0.914945	3.28623e-06
221	DPT	MSTRG.2907	ENSG00000143196	0.883332	22.0901	4.64273	3.31196e-06
222	SSH1	MSTRG.25091	ENSG00000084112	0.467093	6.3332	3.75829	3.78694e-06
223	GASK1B	MSTRG.10382	ENSG00000164125	3.87117	13.9108	1.8451	3.96141e-06
224	EFHD1	MSTRG.6593	ENSG00000115468	0.404062	10.1622	4.64907	4.5806e-06
225	GPR137B	MSTRG.3820	ENSG00000077585	3.68189	9.66587	1.39221	4.8402e-06
226	ANKRD20A12P	MSTRG.40831	HGNC:43603	0.143085	6.93382	5.58886	5.0282e-06
227	TCTN1	MSTRG.25144	ENSG00000204852	3.52736	8.58306	1.28266	5.075e-06
228	SECTM1	MSTRG.32950	ENSG00000141574	6.94837	34.1353	2.29635	5.08319e-06
229	ID1	MSTRG.36789	ENSG00000125968	2.84351	15.5113	2.44716	5.42701e-06
230	DSTYK	MSTRG.3353	ENSG00000133059	0.0674195	5.13357	6.22969	5.6375e-06
231	VWCE	MSTRG.22143	ENSG00000167992	1.98532	6.36726	1.6808	5.92912e-06
232	LGALS9	MSTRG.31380	ENSG00000168961	0	10.6673	13.381	6.27723e-06
233	ENC1	MSTRG.11233	ENSG00000171617	10.9479	22.1423	1.01609	6.32151e-06
234	FAM20A	MSTRG.32564	ENSG00000108950	1.08531	3.57907	1.72056	6.32151e-06
235	CD36	MSTRG.15327	ENSG00000135218	0	1.41023	10.4627	6.54556e-06
236	IGFBP5	MSTRG.6365	ENSG00000115461	38.8997	185.964	2.25716	6.5991e-06
237	HOXD4	MSTRG.5912	ENSG00000170166	0.187363	2.55745	3.76368	7.28723e-06
238	RAB31	MSTRG.33078	ENSG00000168461	3.72479	15.9177	2.0951	7.38337e-06
239	DHX58	MSTRG.31801	ENSG00000108771	0.95732	6.04792	2.6581	8.10095e-06
240	AOPEP	MSTRG.18693	ENSG00000148120	0.11255	0.524914	2.2115	8.18466e-06
241	SLC44A2	MSTRG.34297	ENSG00000129353	41.8544	91.9184	1.13496	8.18466e-06
242	TMEM35B	MSTRG.898	ENSG00000243749	9.14055	20.2717	1.14903	8.29792e-06
243	SHFL	MSTRG.34252	ENSG00000130813	8.21129	34.194	2.05793	8.29992e-06
244	TRIM22	MSTRG.21512	ENSG00000132274	7.23811	25.6109	1.82293	8.40575e-06
245	PCDH7	MSTRG.9382	ENSG00000169851	0.258148	2.39284	3.20748	8.73382e-06
246	PTGER1	MSTRG.34551	ENSG00000160951	2.01969	9.55169	2.24106	8.73878e-06
247	SLC22A15	MSTRG.2094	ENSG00000163393	0	0.63944	9.32292	8.96146e-06
248	THBS3	MSTRG.2625	ENSG00000169231	4.36723	12.1371	1.47442	9.11579e-06
249	TMEM123	MSTRG.23117	ENSG00000152558	13.7815	45.6969	1.72929	9.17202e-06
250	TMX4	MSTRG.36608	ENSG00000125827	4.51314	13.7357	1.60551	9.35111e-06
251	SLC52A1	MSTRG.30914	ENSG00000132517	0	2.61629	11.3539	9.64688e-06
252	PALMD	MSTRG.1843	ENSG00000099260	0	3.69627	11.8522	1.00285e-05
253	TMEM9	MSTRG.3245	ENSG00000116857	17.8512	31.8431	0.834924	1.02859e-05
254	PDPN	MSTRG.366	ENSG00000162493	3.22965	8.83008	1.45077	1.02888e-05
255	MRGPRF	MSTRG.22683	ENSG00000172935	55.6858	90.4043	0.699071	1.1363e-05
256	ATP6V0E2	MSTRG.16267	ENSG00000171130	3.53146	9.29133	1.39536	1.18187e-05
257	MAP6	MSTRG.22864	ENSG00000171533	0.0148212	0.959075	5.92322	1.19948e-05
258	SLC3A2	MSTRG.22253	ENSG00000168003	93.5023	142.793	0.610851	1.20974e-05
259	NR1D1	MSTRG.31718	ENSG00000126368	0.904073	12.079	3.73844	1.25562e-05
260	CAVIN2	MSTRG.6121	ENSG00000168497	1.96725	8.66972	2.13924	1.25764e-05
261	PKD2	MSTRG.9842	ENSG00000118762	4.76137	14.4084	1.59726	1.32948e-05
262	RASA1	MSTRG.11383	ENSG00000145715	5.51504	15.0104	1.44436	1.33825e-05
263	ZNF532	MSTRG.33389	ENSG00000074657	0.554428	3.98557	2.84348	1.40659e-05
264	ASAH1	MSTRG.16524	ENSG00000104763	9.18551	26.3175	1.51849	1.4212e-05
265	SMAD7	MSTRG.33301	ENSG00000101665	0.510038	3.29848	2.69074	1.50102e-05
266	NPTX1	MSTRG.32816	ENSG00000171246	9.80938	53.4317	2.44534	1.50609e-05
267	CXCL11	MSTRG.9696	ENSG00000169248	0.0640826	6.40406	6.6208	1.51377e-05
268	PHYH	MSTRG.19836	ENSG00000107537	7.75055	17.2579	1.15478	1.52956e-05
269	SELENOP	MSTRG.10887	ENSG00000250722	0.412397	4.74567	3.52132	1.54774e-05
270	MT-ATP6	MSTRG.19	ENSG00000198899	17.8022	38.342	1.10683	1.57648e-05
271	ALG2	MSTRG.18814	ENSG00000119523	8.53055	17.6486	1.04876	1.59129e-05
272	B4GAT1	MSTRG.22528	ENSG00000174684	10.4388	20.1476	0.94859	1.64828e-05
273	SGK3	MSTRG.17023	ENSG00000104205	0.0429302	0.899275	4.35708	1.65301e-05
274	RIGI	MSTRG.18076	ENSG00000107201	0.271067	18.1487	6.05983	1.65921e-05
275	TNFSF18	MSTRG.2957	ENSG00000120337	2.17321	10.6816	2.2967	1.65921e-05
276	THBD	MSTRG.36691	ENSG00000178726	0.170676	3.15212	4.19902	1.67006e-05
277	NETO1	MSTRG.33483	ENSG00000166342	0	0.84969	9.73249	1.69182e-05
278	PLPP3	MSTRG.1421	ENSG00000162407	7.149	40.6814	2.50839	1.69343e-05
279	ATL1	MSTRG.26692	ENSG00000198513	2.81659	7.95541	1.49766	1.69343e-05
280	LAPTM5	MSTRG.768	ENSG00000162511	0	1.79023	10.8067	1.69343e-05
281	SLC29A3	MSTRG.20415	ENSG00000198246	0	1.02352	10.0007	1.79322e-05
282	LRRC40	MSTRG.1552	ENSG00000066557	0	2.52664	11.3036	1.80712e-05
283	FEZ1	MSTRG.23461	ENSG00000149557	5.79123	10.6282	0.875847	1.88771e-05
284	TMED10	MSTRG.27142	ENSG00000170348	44.1915	90.0425	1.02682	1.90778e-05
285	TMTC1	MSTRG.24045	ENSG00000133687	4.80383	18.3935	1.93672	1.91337e-05
286	GNS	MSTRG.24663	ENSG00000135677	27.1994	57.4311	1.07823	1.91337e-05
287	PAQR7	MSTRG.626	ENSG00000182749	3.33987	7.23987	1.11594	1.99457e-05
288	ELFN1	MSTRG.14267	ENSG00000225968	0.924994	3.35911	1.85944	2.05674e-05
289	FAS	MSTRG.20664	ENSG00000026103	1.17271	2.89935	1.30515	2.22991e-05
290	CMPK2	MSTRG.4017	ENSG00000134326	0	6.12148	12.5799	2.22991e-05
291	CDH2	MSTRG.33197	ENSG00000170558	0.661382	7.96487	3.5881	2.28452e-05
292	PCCA	MSTRG.26130	ENSG00000175198	0	0.671241	9.39283	2.39252e-05
293	RTN4RL1	MSTRG.30806	ENSG00000185924	0	3.21998	11.6533	2.47842e-05
294	TOB1	MSTRG.32267	ENSG00000141232	9.94162	26.7726	1.42911	2.50042e-05
295	MANEAL	MSTRG.966	ENSG00000185090	0.0572921	2.59125	5.47476	2.62377e-05
296	C1QTNF2	MSTRG.12239	ENSG00000145861	0.508273	3.32684	2.70808	2.69559e-05
297	JAM2	MSTRG.37567	ENSG00000154721	0.0363201	2.8547	6.25775	2.88897e-05
298	SDC1	MSTRG.4140	ENSG00000115884	27.6952	46.3029	0.741446	2.88897e-05
299	TIGAR	MSTRG.23625	ENSG00000078237	2.12015	7.23577	1.7705	2.93215e-05
300	RBM43	MSTRG.5679	ENSG00000184898	0.170487	3.92354	4.51635	2.99686e-05
301	LRIF1	MSTRG.1972	ENSG00000121931	0.836049	3.31415	1.98569	3.01427e-05
302	CXCL16	MSTRG.30877	ENSG00000161921	0.462487	3.67792	2.98868	3.02334e-05
303	NR1D2	MSTRG.7046	ENSG00000174738	0	2.29574	11.1654	3.02334e-05
304	KCNE4	MSTRG.6476	ENSG00000152049	1.45288	9.59739	2.72288	3.07068e-05
305	PCDHGA6	MSTRG.11956	ENSG00000253731	2.98034	5.32764	0.837806	3.07346e-05
306	RETSAT	MSTRG.5030	ENSG00000042445	6.62637	13.7534	1.05338	3.15112e-05
307	HEXA	MSTRG.28462	ENSG00000213614	22.5316	34.8571	0.629477	3.20111e-05
308	RFX8	MSTRG.5262	ENSG00000196460	0	2.91778	11.5111	3.47825e-05
309	PDZRN3	MSTRG.7795	ENSG00000121440	0.34421	4.35053	3.65598	3.53049e-05
310	CYB5D2	MSTRG.30857	ENSG00000167740	3.68542	7.12301	0.950472	3.54168e-05
311	FZD8	MSTRG.20074	ENSG00000177283	1.3144	8.45958	2.68525	3.62574e-05
312	IRX5	MSTRG.30031	ENSG00000176842	1.23954	4.12694	1.73445	3.62574e-05
313	SPR	MSTRG.4893	ENSG00000116096	12.7949	24.3949	0.930955	3.75626e-05
314	TM7SF3	MSTRG.24012	ENSG00000064115	12.6363	30.5544	1.27374	3.78553e-05
315	SANBR	MSTRG.4702	ENSG00000162929	0.471998	1.05127	1.1536	3.78553e-05
316	F10	MSTRG.26246	ENSG00000126218	18.3833	35.8302	0.962741	3.84275e-05
317	RSAD2	MSTRG.4018	ENSG00000134321	0	6.61937	12.6927	3.84275e-05
318	OLFML2B	MSTRG.2844	ENSG00000162745	0.49164	4.59586	3.22204	3.87261e-05
319	WSB1	MSTRG.31378	ENSG00000109046	4.45208	11.5093	1.37005	3.87261e-05
320	EMC7	MSTRG.27699	ENSG00000134153	66.8757	108.463	0.697637	3.88227e-05
321	CDH13	MSTRG.30488	ENSG00000140945	2.25814	5.27859	1.22465	3.88227e-05
322	MAMDC2	MSTRG.18430	ENSG00000165072	1.45453	8.34151	2.51894	3.9044e-05
323	CYB5R1	MSTRG.3309	ENSG00000159348	33.6054	48.342	0.52457	3.9044e-05
324	MX1	MSTRG.37749	ENSG00000157601	0.905745	75.8789	6.38688	3.98505e-05
325	CES2	MSTRG.30144	ENSG00000172831	11.9027	22.2776	0.904252	3.99638e-05
326	GBP3	MSTRG.1708	ENSG00000117226	4.32238	16.3523	1.91935	4.01566e-05
327	TMEM109	MSTRG.22133	ENSG00000110108	44.5085	71.5587	0.685033	4.12928e-05
328	BATF2	MSTRG.22354	ENSG00000168062	0.111252	14.0971	6.97262	4.23613e-05
329	CRTC2	MSTRG.2558	ENSG00000160741	20.6425	30.7927	0.576949	4.64134e-05
330	SCARB2	MSTRG.9698	ENSG00000138760	25.9673	52.5782	1.01774	4.66982e-05
331	KCTD12	MSTRG.26011	ENSG00000178695	1.14112	5.6084	2.29614	4.7486e-05
332	OXER1	MSTRG.4487	ENSG00000162881	0.538496	3.56517	2.72469	4.83598e-05
333	CLIC2	MSTRG.40218	ENSG00000155962	0	3.0875	11.5927	4.92702e-05
334	FAM47E	MSTRG.9700	ENSG00000189157	2.95477	7.3091	1.30635	4.93557e-05
335	MR1	MSTRG.3108	ENSG00000153029	2.6174	7.40309	1.49964	4.9807e-05
336	RNF170	MSTRG.16858	ENSG00000120925	1.61327	4.45325	1.4643	5.01605e-05
337	CCDC9B	MSTRG.27790	ENSG00000188549	0.549257	5.20612	3.24231	5.57909e-05
338	DEPDC7	MSTRG.21836	ENSG00000121690	1.43495	7.19704	2.3256	5.8599e-05
339	LPCAT2	MSTRG.30042	ENSG00000087253	0.21991	3.74244	4.08284	6.60201e-05
340	CMBL	MSTRG.10684	ENSG00000164237	3.39311	8.56794	1.33608	6.95117e-05
341	ADAMTS19	MSTRG.11692	ENSG00000145808	0.0189876	1.71531	6.42406	7.24132e-05
342	MMD	MSTRG.32287	ENSG00000108960	0	2.2197	11.1168	7.24132e-05
343	CLEC11A	MSTRG.35998	ENSG00000105472	75.3861	138.693	0.879513	7.345e-05
344	TOR1B	MSTRG.19380	ENSG00000136816	10.1785	26.9204	1.40309	7.36095e-05
345	SULF2	MSTRG.37161	ENSG00000196562	2.15782	19.2708	3.15818	7.67051e-05
346	SLC66A3	MSTRG.4076	ENSG00000162976	6.28925	14.8611	1.24045	7.89912e-05
347	DEPP1	MSTRG.20141	ENSG00000165507	0.0155191	2.27751	7.10781	8.04075e-05
348	ITIH5	MSTRG.19782	ENSG00000123243	0.886591	22.6108	4.67104	8.20879e-05
349	GBP2	MSTRG.1712	ENSG00000162645	0	1.51598	10.567	8.32694e-05
350	MGAT5B	MSTRG.32727	ENSG00000167889	0	1.52266	10.5733	8.46714e-05
351	OAS3	MSTRG.25185	ENSG00000111331	0	33.6683	15.0391	8.51706e-05
352	H2BC21	MSTRG.2368	ENSG00000184678	11.8244	26.7145	1.17579	8.98026e-05
353	KLHDC9	MSTRG.2802	ENSG00000162755	0.291322	2.35222	3.00901	9.03562e-05
354	SERPINE2	MSTRG.6484	ENSG00000135919	262.278	1038.07	1.98472	9.22927e-05
355	RND3	MSTRG.5670	ENSG00000115963	84.7553	204.227	1.26879	9.35354e-05
356	ADORA1	MSTRG.3315	ENSG00000163485	0.68468	3.86265	2.49436	9.91892e-05
357	TRIB2	MSTRG.4087	ENSG00000071575	0.747572	4.14139	2.46825	0.000100321
358	VEGFB	MSTRG.22306	ENSG00000173511	32.2292	56.3862	0.806953	0.000102017
359	GABBR2	MSTRG.18799	ENSG00000136928	0	4.79419	12.2274	0.000102731
360	SGCE	MSTRG.15441	ENSG00000127990	16.3359	41.9291	1.35985	0.000106305
361	GNPTG	MSTRG.29152	ENSG00000090581	21.6278	33.4299	0.628227	0.000108081
362	FBXW7	MSTRG.10353	ENSG00000109670	0	0.19977	7.6494	0.000108228
363	THRA	MSTRG.31717	ENSG00000126351	2.9552	6.01333	1.02466	0.000110297
364	CHRM2	MSTRG.16073	ENSG00000181072	1.44218	9.05042	2.6489	0.000113658
365	PGGHG	MSTRG.21339	ENSG00000142102	36.7647	110.929	1.59322	0.000113658
366	TMBIM1	MSTRG.6384	ENSG00000135926	53.4335	107.165	1.00401	0.000115229
367	HERC5	MSTRG.9854	ENSG00000138646	0	5.62467	12.4578	0.000115886
368	H2BC18	MSTRG.2212	ENSG00000203814	0.133091	1.74108	3.69953	0.000116939
369	CREB3L2	MSTRG.16097	ENSG00000182158	2.79722	14.9786	2.42042	0.000119408
370	GNG11	MSTRG.15424	ENSG00000127920	26.926	91.016	1.75708	0.000123462
371	ENTPD1	MSTRG.20759	ENSG00000138185	0	0.901839	9.81832	0.000134265
372	CRYZ	MSTRG.1577	ENSG00000116791	3.54231	11.6778	1.72072	0.000135106
373	MGARP	MSTRG.10240	ENSG00000137463	8.25889	17.7276	1.10189	0.000136576
374	BLVRB	MSTRG.35334	ENSG00000090013	39.8984	59.0202	0.564864	0.000136576
375	NFE2L2	MSTRG.5946	ENSG00000116044	16.7322	48.3983	1.53227	0.000137253
376	SPART	MSTRG.25736	ENSG00000133104	3.13272	7.57378	1.27333	0.000138621
377	GEM	MSTRG.17249	ENSG00000164949	0.504878	2.9041	2.52173	0.000140491
378	PMEPA1	MSTRG.37284	ENSG00000124225	0.573891	3.91782	2.76906	0.000140491
379	LEPR	MSTRG.1509	ENSG00000116678	7.24092	17.0264	1.23341	0.000146931
380	PIGK	MSTRG.1591	ENSG00000142892	3.56352	8.76437	1.29811	0.000147918
381	RNF130	MSTRG.12474	ENSG00000113269	1.94966	3.7208	0.932042	0.000150422
382	RNF4	MSTRG.27958	ENSG00000063978	1.71118	7.22702	2.07777	0.000150422
383	CYB561	MSTRG.32442	ENSG00000008283	9.88029	24.5024	1.31021	0.000150422
384	GGTA1	MSTRG.19107	ENSG00000204136	0	0.675854	9.4027	0.000151038
385	MACROH2A2	MSTRG.20387	ENSG00000099284	0.648158	5.39268	3.05463	0.000151038
386	SIAE	MSTRG.23436	ENSG00000110013	2.17519	6.10627	1.48872	0.000152897
387	JKAMP	MSTRG.26843	ENSG00000050130	7.34241	16.7254	1.1876	0.000152897
388	LY75	MSTRG.5740	ENSG00000054219	0.305088	1.91847	2.64869	0.000155039
389	NABP1	MSTRG.6117	ENSG00000173559	1.43006	3.11889	1.12441	0.00015549
390	HERC6	MSTRG.9850	ENSG00000138642	0	21.9644	14.4229	0.000167689
391	RRM2B	MSTRG.17373	ENSG00000048392	2.72359	15.8898	2.54408	0.00016901
392	PDPK1	MSTRG.29251	ENSG00000140992	1.17081	3.12885	1.41736	0.000180149
393	VMP1	MSTRG.32362	ENSG00000062716	8.44287	13.7996	0.70876	0.000185063
394	SLC8A1	MSTRG.4472	ENSG00000183023	0	1.16819	10.1913	0.000185977
395	TSPAN3	MSTRG.28600	ENSG00000140391	13.3709	23.6002	0.819659	0.000191675
396	USP34	MSTRG.4710	ENSG00000115464	2.82047	5.19471	0.880877	0.000192755
397	OSR2	MSTRG.17316	ENSG00000164920	14.8098	29.5855	0.998291	0.000201916
398	H2BC12	MSTRG.12825	ENSG00000197903	31.797	60.3711	0.924948	0.000204081
399	TRIM5	MSTRG.21508	ENSG00000132256	1.10335	4.64067	2.07144	0.000204964
400	MSL1	MSTRG.31724	ENSG00000188895	8.42272	14.5697	0.790544	0.00020617
401	GOLM1	MSTRG.18554	ENSG00000135052	11.5244	23.9933	1.05788	0.000211224
402	PGM5	MSTRG.18414	ENSG00000154330	0	1.71593	10.7456	0.000218973
403	HSPB2	MSTRG.23226	ENSG00000170276	1.65492	9.22549	2.47815	0.000218973
404	TNFRSF10B	MSTRG.16595	ENSG00000120889	35.1091	53.3096	0.602537	0.000219747
405	TSEN15	MSTRG.3149	ENSG00000198860	3.91222	7.3017	0.900074	0.000219747
406	TCTN3	MSTRG.20758	ENSG00000119977	42.3691	80.2947	0.922275	0.000222334
407	YPEL5	MSTRG.4333	ENSG00000119801	12.8403	22.3054	0.796664	0.000222334
408	HAUS4	MSTRG.26408	ENSG00000092036	3.39282	6.69168	0.979675	0.000224451
409	TMEM119	MSTRG.25080	ENSG00000183160	45.4007	84.0379	0.88831	0.000226493
410	PROCR	MSTRG.36906	ENSG00000101000	13.042	22.5555	0.790265	0.000227653
411	TUSC1	MSTRG.18049	ENSG00000198680	3.70282	8.63335	1.22107	0.000232081
412	PAG1	MSTRG.17155	ENSG00000076641	0.0355612	1.2187	5.06006	0.000234012
413	WASHC2C	MSTRG.20155	ENSG00000172661	0.595798	4.29008	2.84603	0.00023734
414	LRRC20	MSTRG.20397	ENSG00000172731	0.32254	4.96032	3.93871	0.000240984
415	ITFG1	MSTRG.29954	ENSG00000129636	11.8825	28.4466	1.25935	0.000243289
416	ERCC5	MSTRG.26156	ENSG00000134899	3.65715	8.64849	1.2415	0.00024594
417	AZIN2	MSTRG.870	ENSG00000142920	0.0376399	0.547607	3.82761	0.000251539
418	MLPH	MSTRG.6666	ENSG00000115648	3.09181	7.91413	1.35569	0.000253517
419	SNAI2	MSTRG.16895	ENSG00000019549	17.4943	32.007	0.871464	0.000269421
420	HSD17B11	MSTRG.9832	ENSG00000198189	3.24029	8.45874	1.38404	0.000274176
421	NFIL3	MSTRG.18612	ENSG00000165030	1.4384	3.67684	1.35339	0.000282811
422	CCN3	MSTRG.17489	ENSG00000136999	3.03161	14.3511	2.24263	0.000282989
423	SLC40A1	MSTRG.6068	ENSG00000138449	0.0162358	2.65017	7.26508	0.000283167
424	SLC46A3	MSTRG.25680	ENSG00000139508	0.0848103	2.40833	4.81134	0.000289893
425	APBB1IP	MSTRG.19947	ENSG00000077420	0	4.00765	11.9689	0.000291759
426	ZNF442	MSTRG.34431	ENSG00000198342	0.0118126	0.438179	5.09918	0.000292537
427	ZFP36L1	MSTRG.26975	ENSG00000185650	21.2485	46.3044	1.12375	0.000295197
428	KLHL21	MSTRG.242	ENSG00000162413	7.00102	13.5265	0.950048	0.000301893
429	ACVR2A	MSTRG.5650	ENSG00000121989	0.106629	2.68499	4.64131	0.000306962
430	COPS8	MSTRG.6633	ENSG00000198612	14.8884	27.2872	0.873989	0.000314542
431	LIMA1	MSTRG.24276	ENSG00000050405	7.0197	13.167	0.907346	0.00031867
432	SAMD9	MSTRG.15414	ENSG00000205413	0.104252	6.66593	5.98511	0.00031938
433	DEPTOR	MSTRG.17494	ENSG00000155792	0	1.98047	10.9524	0.000322709
434	CANX	MSTRG.12462	ENSG00000127022	24.6201	59.4597	1.27204	0.000329229
435	COX20	MSTRG.3888	ENSG00000203667	0.076225	1.89375	4.61679	0.000329229
436	SMARCAD1	MSTRG.9882	ENSG00000163104	0	1.34286	10.3922	0.000329812
437	LUM	MSTRG.24859	ENSG00000139329	74.6817	153.291	1.03744	0.000331159
438	HCFC1R1	MSTRG.29301	ENSG00000103145	20.0292	35.9246	0.84284	0.000331595
439	PIK3R1	MSTRG.11140	ENSG00000145675	0	1.69685	10.7295	0.000342639
440	SYPL2	MSTRG.1923	ENSG00000143028	1.29578	18.9461	3.86897	0.000348123
441	ABHD4	MSTRG.26386	ENSG00000100439	8.70492	20.8562	1.26047	0.000351345
442	RAB7B	MSTRG.3377	ENSG00000276600	2.18374	5.64917	1.37083	0.000351384
443	PPM1K	MSTRG.9844	ENSG00000163644	1.62335	5.55895	1.77521	0.00035248
444	ANXA3	MSTRG.9746	ENSG00000138772	0.312419	3.6729	3.55115	0.000354304
445	MEF2A	MSTRG.28962	ENSG00000068305	0.575098	3.78389	2.71586	0.000354872
446	CEP95	MSTRG.32482	ENSG00000258890	0.0247278	0.761954	4.8902	0.000355976
447	PLTP	MSTRG.37130	ENSG00000100979	34.0301	117.871	1.7923	0.000361066
448	STC2	MSTRG.12318	ENSG00000113739	52.106	117.079	1.16795	0.000363558
449	LGMN	MSTRG.27283	ENSG00000100600	14.7241	29.7204	1.01322	0.000364222
450	NIPAL3	MSTRG.594	ENSG00000001461	8.50451	23.4337	1.46217	0.000371309
451	OTUD7B	MSTRG.2375	ENSG00000264522	0	1.15704	10.1775	0.000374564
452	LDB1	MSTRG.20939	ENSG00000198728	6.43189	11.5434	0.84366	0.000375066
453	SLC30A1	MSTRG.3441	ENSG00000170385	1.54224	5.49886	1.83343	0.00037579
454	LPL	MSTRG.16537	ENSG00000175445	0	4.23071	12.047	0.000387661
455	ITGBL1	MSTRG.26139	ENSG00000198542	6.57404	31.8468	2.27612	0.000387661
456	MAP4K2	MSTRG.22341	ENSG00000168067	0.979104	3.65346	1.89865	0.000396104
457	STAT1	MSTRG.6104	ENSG00000115415	26.8949	136.245	2.34075	0.00040037
458	CCDC30	MSTRG.1082	ENSG00000186409	2.40898	4.15777	0.787134	0.000403748
459	HES4	MSTRG.46	ENSG00000188290	0.773508	4.69274	2.59939	0.000404489
460	GDPD5	MSTRG.22854	ENSG00000158555	0.00153666	0.275823	6.76989	0.000407399
461	GLS	MSTRG.6098	ENSG00000115419	4.22694	9.97593	1.23864	0.000418469
462	OASL	MSTRG.25327	ENSG00000135114	0	3.06504	11.5822	0.000421182
463	PPIL3	MSTRG.6179	ENSG00000240344	3.95677	7.97668	1.01128	0.000427513
464	SRXN1	MSTRG.36436	ENSG00000271303	35.8224	56.0247	0.645186	0.000445218
465	LSP1	MSTRG.5099	ENSG00000130592	3.30265	6.07321	0.878637	0.000445453
466	DYNC2LI1	MSTRG.4527	ENSG00000138036	2.52529	5.57882	1.1432	0.000447159
467	ATP10A	MSTRG.27645	ENSG00000206190	0.0568356	2.55166	5.4639	0.000447836
468	SS18	MSTRG.33191	ENSG00000141380	6.57996	16.3094	1.30942	0.000447836
469	ARL4D	MSTRG.31918	ENSG00000175906	6.84665	14.8567	1.11754	0.000453076
470	AK3	MSTRG.17876	ENSG00000147853	7.30922	17.8746	1.29001	0.000459838
471	RNF13	MSTRG.8418	ENSG00000082996	0.690274	1.68645	1.28752	0.000468599
472	RPP25	MSTRG.28523	ENSG00000178718	4.38452	8.90534	1.02208	0.000472284
473	CIMAP3	MSTRG.1980	ENSG00000173947	0	1.48412	10.5364	0.000488098
474	TFPI2	MSTRG.15423	ENSG00000105825	11.8207	60.7243	2.36086	0.000490835
475	TMEM50A	MSTRG.608	ENSG00000183726	31.4848	51.7964	0.718182	0.000492497
476	CD27	MSTRG.23665	ENSG00000139193	1.16797	3.24924	1.47531	0.000500857
477	BPGM	MSTRG.16034	ENSG00000172331	10.351	19.3415	0.901859	0.000508831
478	FBXO27	MSTRG.35274	ENSG00000161243	0.247364	0.983846	1.98744	0.000526732
479	MALL	MSTRG.5329	ENSG00000144063	0.493925	2.60778	2.3981	0.000530291
480	COQ10A	MSTRG.24514	ENSG00000135469	2.04191	5.92774	1.5371	0.000546117
481	SLC23A2	MSTRG.36568	ENSG00000089057	0.0650099	3.17085	5.5865	0.000547608
482	TMEM106C	MSTRG.24173	ENSG00000134291	20.3887	35.5356	0.801467	0.000549798
483	RAB2B	MSTRG.26344	ENSG00000129472	2.04002	6.77437	1.73101	0.00055226
484	TMEM128	MSTRG.9141	ENSG00000132406	3.80645	8.45407	1.15099	0.000556005
485	PARP12	MSTRG.16123	ENSG00000059378	1.5769	10.868	2.78415	0.00055845
486	CC2D2A	MSTRG.9282	ENSG00000048342	0.673147	2.01878	1.58306	0.00055845
487	SOCS3	MSTRG.32757	ENSG00000184557	1.91906	9.32483	2.28008	0.000560187
488	IFITM3	MSTRG.21347	ENSG00000142089	696.116	1482.76	1.09089	0.000569701
489	IVNS1ABP	MSTRG.3164	ENSG00000116679	1.71888	5.09236	1.56631	0.000576675
490	FOXQ1	MSTRG.12535	ENSG00000164379	0.637765	4.07559	2.674	0.000577016
491	SAMD9L	MSTRG.15416	ENSG00000177409	0.370461	11.2028	4.91464	0.000585146
492	C1R	MSTRG.41703	ENSG00000159403	8.42279	68.5815	3.0253	0.000588726
493	SERINC3	MSTRG.37077	ENSG00000132824	26.772	46.3362	0.79139	0.0006043
494	SLC25A28	MSTRG.20860	ENSG00000155287	6.98864	13.306	0.928891	0.000614983
495	H4C15	MSTRG.2361	ENSG00000270276	0.107136	1.04906	3.27955	0.000622086
496	MEGF6	MSTRG.200	ENSG00000162591	0.475381	4.52182	3.24703	0.000622096
497	ARL15	MSTRG.10970	ENSG00000185305	0	0.652987	9.35312	0.000628674
498	HNMT	MSTRG.5633	ENSG00000150540	0.42327	1.49527	1.81831	0.000643057
499	SQOR	MSTRG.27983	ENSG00000137767	58.5115	99.0734	0.759769	0.000644805
500	ABHD15	MSTRG.31447	ENSG00000168792	2.768	6.18685	1.16007	0.000644805
501	RECQL	MSTRG.23973	ENSG00000004700	6.30485	13.6228	1.11137	0.000651578
502	TMEM198	MSTRG.24466	ENSG00000188760	0.948903	5.01002	2.39925	0.000672043
503	H4C1	MSTRG.12804	ENSG00000278637	0.578636	3.53529	2.60902	0.000685013
504	H4C2		ENSG00000278705
505	H4C3		ENSG00000197061
506	H4C4		ENSG00000277157
507	H4C5		ENSG00000276966
508	H4C6		ENSG00000274618
509	H4C8		ENSG00000158406
510	H4C9		ENSG00000276180
511	H4C11		ENSG00000197238
512	H4C12		ENSG00000273542
513	H4C13		ENSG00000275126
514	H4C14		ENSG00000270882
515	H4C15		ENSG00000270276
516	H4C16		ENSG00000197837
517	MOCOS	MSTRG.33247	ENSG00000075643	0.142647	1.78615	3.63706	0.00068556
518	CLU	MSTRG.16656	ENSG00000120885	27.7965	46.8696	0.75373	0.000696118
519	MAPDA	MSTRG.27908	ENSG00000168803	0	1.12799	10.1408	0.000696574
520	NAAA	MSTRG.9688	ENSG00000138744	3.52502	8.95386	1.34463	0.00070247
521	EEPD1	MSTRG.14759	ENSG00000122547	0.650627	3.3425	2.35924	0.000708041
522	NLRP1	MSTRG.30947	ENSG00000091592	3.94084	10.1545	1.36532	0.000708041
523	BST1	MSTRG.9289	ENSG00000109743	3.91601	6.87033	0.810836	0.000711613
524	EVC	MSTRG.9187	ENSG00000072840	1.09772	4.96744	2.17697	0.000718882
525	SOCS5	MSTRG.4561	ENSG00000171150	1.41503	5.41918	1.93649	0.000730167
526	IMPACT	MSTRG.33181	ENSG00000154059	3.48982	8.5912	1.29946	0.000743533
527	CCDC74A	MSTRG.5577	ENSG00000163040	1.10765	2.66884	1.26795	0.000744991
528	MGST1	MSTRG.23947	ENSG00000008394	11.8135	22.0602	0.900956	0.000745438
529	NUCB1	MSTRG.35832	ENSG00000104805	100.061	132.884	0.409279	0.000755639
530	MGAT3	MSTRG.38661	ENSG00000128268	0.448611	3.56203	2.98635	0.000760864
531	ETV7	MSTRG.13035	ENSG00000010030	0.0340166	2.23211	5.99487	0.000762047
532	H2BC4	MSTRG.12781	ENSG00000180596	2.06083	6.56809	1.67177	0.000776142
533	H2BC6		ENSG00000274290
534	H2BC7		ENSG00000277224
535	H2BC8		ENSG00000273802
536	H2BC10		ENSG00000278588
537	SLC11A1	MSTRG.6389	ENSG00000018280	12.543	16.9035	0.430408	0.000782718
538	C1QL1	MSTRG.32016	ENSG00000131094	0.775174	3.45913	2.15637	0.000788318
539	CERS4	MSTRG.34143	ENSG00000090661	1.35826	3.57503	1.39554	0.000788318
540	CERS6	MSTRG.5801	ENSG00000172292	0.821737	3.43506	2.06225	0.000788435
541	F2RL2	MSTRG.11268	ENSG00000164220	4.88146	13.9842	1.51822	0.000798162
542	SLC22A18	MSTRG.21464	ENSG00000118473	3.00787	5.56624	0.887742	0.000806614
543	SGIP1	MSTRG.1517	ENSG00000153250	0.600228	2.29599	1.93376	0.000807279
544	RBMS1	MSTRG.5754	ENSG00000060656	10.0238	21.9575	1.1312	0.000807279
545	PTPRU	MSTRG.760	ENSG00000130766	1.77917	10.2549	2.52637	0.000809709
546	SESN2	gene-SESN2	ENSG00000285069	5.118	9.77653	0.933609	0.000810461
547	NFE2L1	MSTRG.32142	ENSG00000082641	42.3747	63.6027	0.585873	0.000815509
548	AKR1C2	MSTRG.19745	ENSG00000151632	0.140223	1.3387	3.24587	0.000820065
549	FZD1	MSTRG.15373	ENSG00000157240	1.41029	4.33506	1.61938	0.000822458
550	STEAP1	MSTRG.14515	ENSG00000164647	1.81213	5.16529	1.51065	0.00085601
551	TSKU	MSTRG.22880	ENSG00000182704	3.47825	10.2321	1.55639	0.00086327
552	DDX10	MSTRG.23196	ENSG00000178105	1.64715	7.46035	2.17859	0.000864608
553	PIERCE2	MSTRG.28083	ENSG00000261652	0.252154	1.97308	2.96309	0.000864953
554	SLC16A4	MSTRG.1963	ENSG00000168679	5.26933	14.5347	1.46363	0.000871965
555	PTEN	MSTRG.20653	ENSG00000171862	1.93344	4.90877	1.34374	0.000874256
556	PRNP	MSTRG.36563	ENSG00000171867	67.5321	128.772	0.931163	0.000874256
557	PPFIA4	MSTRG.3312	ENSG00000143847	0.163911	0.850886	2.36898	0.000875451
558	IFIT5	MSTRG.20686	ENSG00000152778	2.43211	9.0711	1.89863	0.000884227
559	NHLRC3	MSTRG.25758	ENSG00000188811	1.56978	5.15155	1.71381	0.000887193
560	ADGRA2	MSTRG.16766	ENSG00000020181	14.5336	28.4552	0.969256	0.000889526
561	LINC00596	MSTRG.36954	ENSG00000259334	28.4663	56.9981	1.00163	0.000889526
562	COL8A2	MSTRG.927	ENSG00000171812	5.15323	16.9803	1.72012	0.000906096
563	TMEM9B	MSTRG.21605	ENSG00000175348	23.8039	40.8393	0.778733	0.000906274
564	BMPR2	MSTRG.6225	ENSG00000204217	0.326741	4.33421	3.72548	0.000906274
565	KDSR	MSTRG.33423	ENSG00000119537	4.27303	11.8547	1.47191	0.000906284
566	ZNF181	MSTRG.35031	ENSG00000197841	1.20461	3.286	1.44701	0.000912078
567	TRIM35	MSTRG.16649	ENSG00000104228	3.66608	7.96671	1.11953	0.000918598
568	OCIAD1	MSTRG.9502	ENSG00000109180	18.5654	29.3268	0.659575	0.000919461
569	TFPI	MSTRG.6043	ENSG00000003436	12.9702	38.5305	1.57073	0.000952924
570	WAC	MSTRG.19981	ENSG00000095787	3.15203	7.04703	1.16048	0.000952976
571	H1-2	MSTRG.12772	ENSG00000187837	13.724	34.3635	1.32412	0.000963168
572	STX16	MSTRG.37293	ENSG00000124222	6.24826	14.17	1.18119	0.00096739
573	RIOK3	MSTRG.33166	ENSG00000101782	4.28247	9.23471	1.10844	0.000968279
574	RNPEP	MSTRG.3282	ENSG00000176393	37.0645	49.3598	0.413288	0.000992078
575	ALCAM	MSTRG.7928	ENSG00000170017	8.26754	16.7836	1.02143	0.00100977
576	SCRN1	MSTRG.14653	ENSG00000136193	20.7719	37.8995	0.867512	0.00103016
577	GFPT1	MSTRG.4836	ENSG00000198380	5.06223	10.7023	1.07993	0.00104382
578	SLC25A4	MSTRG.10549	ENSG00000151729	1.43428	4.7526	1.72768	0.00104656
579	AMIGO2	MSTRG.24149	ENSG00000139211	1.27183	6.30406	2.30847	0.00104656
580	ATP6V1G1	MSTRG.19050	ENSG00000136888	24.3778	36.0546	0.564598	0.00105054
581	ANKRA2	MSTRG.11224	ENSG00000164331	1.54279	4.65278	1.59193	0.00105782
582	GUSB	MSTRG.15046	ENSG00000169919	9.899	19.7637	0.997429	0.00106035
583	GOLM2	MSTRG.27945	ENSG00000166734	7.62083	21.0001	1.46225	0.00106458
584	KCNC4	MSTRG.1957	ENSG00000116396	1.60689	4.4014	1.45312	0.00107157
585	ADO	MSTRG.20288	ENSG00000181915	3.98285	8.12183	1.02782	0.00108102
586	SHISA3	MSTRG.9447	ENSG00000178343	0	1.43616	10.489	0.00110283
587	UNC93B1	MSTRG.22647	ENSG00000110057	8.68385	25.0937	1.53081	0.00110534
588	EPSTI1	MSTRG.25812	ENSG00000133106	0.152532	1.66851	3.44281	0.00110534
589	ADAMTS10	MSTRG.34191	ENSG00000142303	0	0.794419	9.63557	0.0011167
590	DHX33	MSTRG.30943	ENSG00000005100	0	2.76165	11.4318	0.00112977
591	ZNF337	MSTRG.36735	ENSG00000130684	1.19992	2.46109	1.03574	0.00113347
592	AMACR	MSTRG.10797	ENSG00000242110	2.96749	6.4197	1.113	0.00113864
593	ASCC3	MSTRG.13610	ENSG00000112249	0.0178359	2.57143	7.0935	0.00113864
594	USP18	MSTRG.37996	ENSG00000184979	0.0882442	14.0735	7.30111	0.00113864
595	PRSS12	MSTRG.10063	ENSG00000164099	4.89202	11.6304	1.24923	0.00113946
596	PNMA8A	MSTRG.35707	ENSG00000182013	0.598774	4.14081	2.78777	0.00115929
597	RAB3GAP1	MSTRG.5615	ENSG00000115839	4.75165	9.25688	0.96195	0.00116242
598	CTBS	MSTRG.1649	ENSG00000117151	0.686027	2.80943	2.03235	0.00118146
599	SVIL	MSTRG.20010	ENSG00000197321	0.73146	4.22295	2.52777	0.00120458
600	ANK1	MSTRG.16829	ENSG00000029534	0.0114121	1.5559	6.97078	0.00121125
601	STK32B	MSTRG.9161	ENSG00000152953	0.518992	5.39155	3.37441	0.0012237
602	EFNA5	MSTRG.11508	ENSG00000184349	0.161606	1.10745	2.76908	0.00123363
603	DDRGK1	MSTRG.36512	ENSG00000198171	10.7268	17.8169	0.731969	0.00123363
604	ARHGAP5	MSTRG.26521	ENSG00000100852	0.292273	2.66923	3.18665	0.00125194
605	GPD2	MSTRG.5709	ENSG00000115159	0.217273	3.82711	4.13243	0.00127244
606	MYCBP2	MSTRG.26020	ENSG00000005810	0.0256539	1.42657	5.74307	0.00127548
607	FBLN7	MSTRG.5361	ENSG00000144152	0.636847	1.99789	1.64792	0.00127745
608	ANKRD18B	MSTRG.40841	ENSG00000230453	0.0389883	1.15367	4.85177	0.00128177
609	SLC35F5	MSTRG.5419	ENSG00000115084	2.52255	8.44814	1.74335	0.00128236
610	H2AC25	MSTRG.3687	ENSG00000181218	1.51783	4.28457	1.49653	0.0012941
611	CLK1	MSTRG.6178	ENSG00000013441	2.60939	5.51052	1.07818	0.0013081
612	PHLDA1	MSTRG.24759	ENSG00000139289	19.466	51.4059	1.40094	0.00130946
613	GALNT18	MSTRG.21669	ENSG00000110328	1.21234	3.15719	1.38011	0.00134143
614	VNN1	MSTRG.13844	ENSG00000112299	0.0551486	1.2641	4.49386	0.00135204
615	SETDB2	MSTRG.25897	ENSG00000136169	2.0772	5.24613	1.33619	0.00136295
616	ANXA1	MSTRG.18462	ENSG00000135046	103.42	161.787	0.645581	0.00136617
617	SLC41A1	MSTRG.3372	ENSG00000133065	4.75852	16.9373	1.8314	0.00137044
618	POGLUT3	MSTRG.23193	ENSG00000178202	3.03643	13.6185	2.16475	0.00138636
619	ARRDC4	MSTRG.28947	ENSG00000140450	4.45276	17.5855	1.98138	0.00138665
620	EDIL3	MSTRG.11376	ENSG00000164176	0	2.71169	11.4055	0.00139117
621	TRUB1	MSTRG.21101	ENSG00000165832	0.335651	3.23781	3.26614	0.00139461
622	CPPED1	MSTRG.29473	ENSG00000103381	5.3965	11.4198	1.08129	0.00140471
623	GPX8	MSTRG.10982	ENSG00000164294	26.1227	43.6501	0.74066	0.00141194
624	ROR2	MSTRG.18614	ENSG00000169071	0	1.07133	10.0665	0.00141756
625	CDIPT	MSTRG.29765	ENSG00000103502	58.1586	74.1251	0.349965	0.00142228
626	TSPAN11	MSTRG.24056	ENSG00000110900	0	1.89679	10.8901	0.00143601
627	FOXF1	MSTRG.30570	ENSG00000103241	15.7528	34.2655	1.1211	0.00144066
628	TM6SF2	MSTRG.34795	ENSG00000213996	0.451313	2.34106	2.37238	0.00144355
629	CERS2	MSTRG.2453	ENSG00000143418	49.007	75.6874	0.627054	0.00145385
630	LIPC	MSTRG.28133	ENSG00000166035	0	1.28505	10.3287	0.00147981
631	TMBIM4	MSTRG.24678	ENSG00000155957	11.7924	23.9858	1.02426	0.00149566
632	WWP1	MSTRG.17178	ENSG00000123124	0	2.64035	11.3671	0.00149982
633	MED29	MSTRG.35285	ENSG00000063322	8.0177	13.6241	0.764821	0.00151137
634	TSTD2	MSTRG.18771	ENSG00000136925	0	2.39865	11.2286	0.00151635
635	CIT	MSTRG.25281	ENSG00000122966	0.000252017	2.32284	10.858	0.00151635
636	CD58	MSTRG.2103	ENSG00000116815	2.48038	5.72865	1.20731	0.00151685
637	LINC00596	MSTRG.10502	ENSG00000259334	0.0541542	0.994671	4.17413	0.00151886
638	CWC22	MSTRG.6002	ENSG00000163510	0	2.25226	11.1378	0.00155484
639	CEBPB	MSTRG.37198	ENSG00000172216	16.1635	24.2897	0.587575	0.00157631
640	USP40	MSTRG.6604	ENSG00000085982	0	1.82481	10.8343	0.00161318
641	SEL1L	MSTRG.27222	ENSG00000071537	3.87407	12.2528	1.66093	0.00161622
642	MRPS30	MSTRG.10940	ENSG00000112996	4.24781	9.01915	1.08609	0.00163833
643	NT5C1B	MSTRG.4108	ENSG00000185013	1.50168	3.35829	1.16062	0.00164406
644	EPS8	MSTRG.23943	ENSG00000151491	1.82146	4.52249	1.31155	0.00166635
645	KCNS3	MSTRG.4107	ENSG00000170745	0.0701369	3.19445	5.48928	0.00168809
646	ZNF160	MSTRG.36072	ENSG00000170949	0.364562	1.67209	2.19433	0.0016935
647	LDAF1	MSTRG.29584	ENSG00000011638	2.07159	4.44219	1.10016	0.00170591
648	ICMT	MSTRG.226	ENSG00000116237	22.0887	34.7909	0.655374	0.00170764
649	LTBP3	MSTRG.22426	ENSG00000168056	15.0048	23.3099	0.635481	0.00171517
650	IRF7	MSTRG.21369	ENSG00000185507	0.183527	4.10307	4.47515	0.00172001
651	SLC25A37	MSTRG.16621	ENSG00000147454	3.75662	7.57431	1.01149	0.00172275
652	CACNA1A	MSTRG.34507	ENSG00000141837	0	1.08027	10.0785	0.00176618
653	BIRC2	MSTRG.23112	ENSG00000110330	9.75709	21.7754	1.1581	0.00177966
654	CXCL8	MSTRG.9659	ENSG00000169429	8.32834	18.9819	1.18842	0.00179755
655	EPB41L1	MSTRG.36956	ENSG00000088367	1.35903	4.46585	1.71562	0.0017976
656	CPT1C	MSTRG.35933	ENSG00000169169	1.59367	5.98317	1.90789	0.00180063
657	B3GALNT1	MSTRG.8539	ENSG00000169255	0.825623	3.05696	1.88727	0.00180063
658	-	MSTRG.14791	XM_047421140	0.445856	1.61218	1.85203	0.00180489
659	HSD3B7	MSTRG.29867	ENSG00000099377	8.24806	14.8245	0.845778	0.00181465
660	DDB2	MSTRG.22002	ENSG00000134574	12.9916	26.8559	1.0476	0.00194276
661	SUSD6	MSTRG.27010	ENSG00000100647	0.525876	6.85166	3.70113	0.00194276
662	NIPAL2	MSTRG.17300	ENSG00000104361	0.354516	7.5121	4.40142	0.00194937
663	SMIM14	MSTRG.9419	ENSG00000163683	1.79481	4.87043	1.43971	0.00195827
664	PDGFRA	MSTRG.9552	ENSG00000134853	6.07531	24.8041	2.02937	0.00196368
665	NUCB2	MSTRG.21731	ENSG00000070081	4.28702	10.6852	1.31736	0.00201154
666	SAMD8	MSTRG.20515	ENSG00000156671	1.20847	4.50074	1.89611	0.00202222
667	SOCS2	MSTRG.24877	ENSG00000120833	0.0642256	0.684125	3.39286	0.0020557
668	ALG5	MSTRG.25744	ENSG00000120697	11.8053	20.6433	0.80619	0.00205626
669	AGTRAP	MSTRG.341	ENSG00000177674	20.8071	31.0612	0.578018	0.0020725
670	THAP8	MSTRG.35111	ENSG00000161277	3.06021	6.22909	1.02515	0.00207648
671	POT1	MSTRG.15880	ENSG00000128513	0	2.23418	11.1262	0.00209963
672	POSTN	MSTRG.25750	ENSG00000133110	1.31754	13.9836	3.40682	0.00209963
673	ENPP2	MSTRG.17490	ENSG00000136960	15.7988	43.9626	1.4764	0.00211932
674	LRRC37B	MSTRG.31555	ENSG00000185158	0	0.919809	9.84676	0.00211932
675	THNSL2	MSTRG.5090	ENSG00000144115	0	0.965311	9.91634	0.00211932
676	SSBP2	MSTRG.11352	ENSG00000145687	0.291216	0.741229	1.34483	0.00213817
677	BET1	MSTRG.15427	ENSG00000105829	2.56682	5.08979	0.987345	0.00216646
678	UBE2H	MSTRG.15957	ENSG00000186591	14.3811	26.8459	0.900482	0.00218363
679	PAWR	MSTRG.24799	ENSG00000177425	0.455615	1.41123	1.62893	0.00219639
680	SEZ6L2	MSTRG.29766	ENSG00000174938	7.40494	18.1594	1.29404	0.00219639
681	RTP4	gene-RTP4	ENSG00000136514	0.237242	2.12398	3.15695	0.00223126
682	CD46	MSTRG.3407	ENSG00000117335	20.1082	45.987	1.1934	0.00223604
683	TOR3A	MSTRG.3056	ENSG00000186283	20.3791	28.2617	0.471738	0.00224773
684	ANTXR1	MSTRG.4833	ENSG00000169604	8.10343	15.03	0.891159	0.00225188
685	PBX3	MSTRG.19175	ENSG00000167081	2.79795	7.01912	1.32661	0.00227568
686	DAB1	MSTRG.1424	ENSG00000173406	0.116726	0.643544	2.45285	0.00229402
687	ACBD5	MSTRG.19965	ENSG00000107897	0.219365	2.54679	3.53128	0.00238033
688	IRF2BP2	MSTRG.3787	ENSG00000168264	4.08962	7.39432	0.854291	0.00238033
689	EGR2	MSTRG.20289	ENSG00000122877	0.241125	3.32898	3.78169	0.00243306
690	NMRAL1	MSTRG.8777	ENSG00000153406	0.500644	7.13811	3.83101	0.00243306
691	GLOD4	MSTRG.30768	ENSG00000167699	9.59492	18.4361	0.942122	0.0024657
692	HEXIM1	MSTRG.32028	ENSG00000186834	9.02463	14.7317	0.706924	0.00246592
693	SPOCK1	MSTRG.11835	ENSG00000152377	3.9145	24.9299	2.67067	0.00249656
694	INAFM2	MSTRG.27787	ENSG00000259330	4.69689	9.20802	0.971033	0.00250176
695	SLC50A1	MSTRG.2615	ENSG00000169241	28.48	36.9789	0.376741	0.00252117
696	ERVK-18	MSTRG.20101	HGNC:39025	1.5813	4.36474	1.4642	0.00256568
697	PRCP	MSTRG.22941	ENSG00000137509	36.3697	60.2434	0.728051	0.0025691
698	ARHGAP35	MSTRG.35733	ENSG00000160007	1.27499	6.21702	2.28484	0.00258247
699	IFITM10	MSTRG.41147	ENSG00000244242	0.540354	4.93693	3.18926	0.0025857
700	NDRG4	MSTRG.30108	ENSG00000103034	0.253693	3.72869	3.87223	0.00260381
701	SCAND1	MSTRG.515	ENSG00000171222	1.51207	3.47009	1.19791	0.00261341
702	NSD3	MSTRG.16796	ENSG00000147548	1.16715	2.98986	1.35634	0.00263344
703	SPRY2	MSTRG.26036	ENSG00000136158	8.20555	22.586	1.46064	0.00263355
704	PCYOX1	MSTRG.4869	ENSG00000116005	8.24639	20.6591	1.32484	0.00263735
705	C11orf68	MSTRG.22473	ENSG00000175573	29.1442	53.097	0.865398	0.00263885
706	IFFO1	MSTRG.23682	ENSG00000010295	8.84252	18.1357	1.03622	0.00264504
707	PLD6	MSTRG.31228	ENSG00000179598	0.632393	4.57518	2.85297	0.00265784
708	SLC39A8	MSTRG.9934	ENSG00000138821	0.115719	1.81555	3.96009	0.00266071
709	STAT2	MSTRG.24521	ENSG00000170581	9.83532	44.2551	2.16968	0.00266478
710	KCT2	MSTRG.11766	ENSG00000113583	17.8869	29.5369	0.723581	0.00267503
711	AHR	MSTRG.14476	ENSG00000106546	0.616961	6.04588	3.2906	0.00267503
712	HELZ2	MSTRG.37409	ENSG00000130589	0.326578	4.95525	3.91934	0.00267503
713	HP1BP3	MSTRG.489	ENSG00000127483	4.8723	9.9988	1.037	0.00267503
714	LAP3	MSTRG.9307	ENSG00000002549	14.7874	40.798	1.46406	0.00267503
715	DDX24	gene-DDX24	ENSG00000089737	7.58761	12.3728	0.705379	0.00267503
716	FADS1	MSTRG.22173	ENSG00000149485	24.0566	63.1705	1.39278	0.00269063
717	KLF5	MSTRG.25989	ENSG00000102554	0.433929	3.55939	3.03319	0.00269063
718	ALDH3B1	MSTRG.22649	ENSG00000006534	18.1676	38.3695	1.07855	0.00269851
719	TMEM19	MSTRG.24734	ENSG00000139291	1.55646	4.43411	1.50977	0.00273433
720	GCNT4	MSTRG.11240	ENSG00000176928	0.123412	1.22525	3.30105	0.0027423
721	SERPINB2	MSTRG.33428	ENSG00000197632	1.7523	10.9395	2.64154	0.00274687
722	IFI30	MSTRG.34714	ENSG00000216490	4.39608	16.6274	1.91903	0.00275209
723	CHPT1	MSTRG.24960	ENSG00000111666	8.10356	20.723	1.3545	0.00277187
724	SNX27	MSTRG.2490	ENSG00000143376	0	2.10445	11.0399	0.00286639
725	ARL4C	MSTRG.6608	ENSG00000188042	2.80057	7.03806	1.32915	0.00287215
726	H2AC6	MSTRG.12782	ENSG00000180573	12.6641	24.0037	0.922455	0.00288852
727	PLAAT3	MSTRG.22260	ENSG00000176485	0.233731	1.74334	2.8936	0.00290783
728	BTBD10	MSTRG.21692	ENSG00000148925	4.81169	8.9767	0.899502	0.00291121
729	ERAP1	MSTRG.11455	ENSG00000164307	0.529408	2.37968	2.1662	0.00292121
730	PARP10	MSTRG.17733	ENSG00000178685	2.20987	10.1596	2.2003	0.00295061
731	MFSD14B	MSTRG.18690	ENSG00000148110	10.0645	23.3136	1.21181	0.00299307
732	ZDHHC1	MSTRG.30205	ENSG00000159714	2.59341	5.31912	1.03605	0.00301959
733	TBL2	MSTRG.15143	ENSG00000106638	9.30075	15.2078	0.709329	0.00302386
734	MRPL49	MSTRG.22371	ENSG00000149792	17.7024	27.2945	0.624642	0.00303429
735	IFITM1	MSTRG.21343	ENSG00000185885	0.0373043	1.50335	5.29549	0.00304002
736	MRFAP1L1	MSTRG.9203	ENSG00000178988	16.0583	23.2663	0.534897	0.00306048
737	SEMA5A	MSTRG.10669	ENSG00000112902	2.64465	10.5817	2.00001	0.00311693
738	TRIM34	MSTRG.21510	ENSG00000258659	0.0322019	1.58443	5.57746	0.00311693
739	HSPA9	MSTRG.11871	ENSG00000113013	29.134	43.0534	0.563405	0.00313984
740	ASTN2	MSTRG.19073	ENSG00000148219	0.286077	1.21352	2.08088	0.00313984
741	METTL25B	MSTRG.2719	ENSG00000143303	0.797092	2.64835	1.73101	0.00313984
742	IFI16	MSTRG.2744	ENSG00000163565	4.87956	13.2715	1.44332	0.00313984
743	ADAR	MSTRG.2590	ENSG00000160710	16.6659	42.7227	1.35805	0.00314388
744	SHROOM3	MSTRG.9704	ENSG00000138771	0.546601	6.88563	3.6526	0.00314946
745	ARF3	MSTRG.24212	ENSG00000134287	34.5379	37.831	0.131383	0.00318271
746	GIMAP2	MSTRG.16288	ENSG00000106560	0.0802656	1.47596	4.18384	0.00323515
747	MLKL	MSTRG.30417	ENSG00000168404	1.03132	4.53449	2.13536	0.00325949
748	TCTN2	MSTRG.25437	ENSG00000168778	2.52097	8.14733	1.69195	0.00326
749	C1RL	MSTRG.23770	ENSG00000139178	0.789479	2.61474	1.72642	0.00329084
750	DTNA	MSTRG.33216	ENSG00000134769	0.0763207	0.870927	3.49528	0.00329697
751	PDE6B	MSTRG.8993	ENSG00000133256	0.0236294	0.734967	4.90119	0.00330279
752	LACTB2	MSTRG.17067	ENSG00000147592	1.73275	5.5286	1.67328	0.00331413
753	IFT81	MSTRG.25125	ENSG00000122970	0.150663	1.33574	3.13978	0.00335393
754	NCR3LG1	MSTRG.21732	ENSG00000188211	0	1.45058	10.5034	0.00335479
755	CYP2U1	MSTRG.9973	ENSG00000155016	0.759466	6.44336	3.08308	0.00335862
756	DNAI3	MSTRG.1654	ENSG00000162643	0	2.12708	11.0553	0.00336619
757	DSTN	MSTRG.23725	ENSG00000125868	1.27828	2.29235	0.842118	0.00340217
758	APPBP2	MSTRG.32384	ENSG00000062725	2.09584	5.98731	1.51393	0.00344821
759	FUCA1	MSTRG.586	ENSG00000179163	2.8797	10.1376	1.81536	0.00345534
760	MBIP	MSTRG.26576	ENSG00000151332	2.11026	5.98021	1.50233	0.00346912
761	NINJ1	MSTRG.18653	ENSG00000131669	16.1351	27.1837	0.752498	0.00352565
762	TPP1	MSTRG.21561	ENSG00000166340	30.9298	79.9748	1.37052	0.00354323
763	CLEC2B	MSTRG.23834	ENSG00000110852	9.63614	22.938	1.25112	0.00354426
764	MOB1A	MSTRG.4924	ENSG00000114978	10.8642	19.5211	0.845391	0.00356974
765	CTSL	MSTRG.18573	ENSG00000135047	113.163	150.8	0.414226	0.0036083
766	BRF2	MSTRG.16768	ENSG00000104221	5.14977	9.50274	0.883708	0.00361032
767	UNG	MSTRG.25098	ENSG00000076248	8.11449	13.8618	0.772471	0.00361032
768	ABITRAM	MSTRG.18906	ENSG00000119328	4.40053	8.28341	0.912396	0.00361548
769	KCNJ6	MSTRG.37726	ENSG00000157542	0	1.47182	10.5244	0.00363335
770	TLR3	MSTRG.10569	ENSG00000164342	0	2.704	11.4014	0.0036703
771	HOXD1	MSTRG.5915	ENSG00000128645	0.121339	1.17524	3.26523	0.00370256
772	USP53	MSTRG.10095	ENSG00000145390	5.05261	17.3198	1.77712	0.00371558
773	SLC27A1	MSTRG.34677	ENSG00000130304	0.863418	5.51161	2.67294	0.00371558
774	HSD17B4	MSTRG.11625	ENSG00000133835	15.3955	26.3729	0.776506	0.00372879
775	SRD5A3	MSTRG.9556	ENSG00000128039	3.73099	7.19484	0.94722	0.00373782
776	C1orf43	MSTRG.2579	ENSG00000143612	43.3647	56.4255	0.379818	0.00373837
777	ZMPSTE24	MSTRG.1031	ENSG00000084073	6.35977	16.0505	1.33543	0.00374665
778	LAMC1	MSTRG.3128	ENSG00000135862	67.2525	111.049	0.723528	0.00374665
779	GGH	MSTRG.16981	ENSG00000137563	14.8649	25.8329	0.797253	0.00375704
780	ARSL	MSTRG.39020	ENSG00000157399	0.124981	2.11553	4.07042	0.00377126
781	TSPAN13	MSTRG.14472	ENSG00000106537	6.93899	16.0521	1.20985	0.0038311
782	RNF112	MSTRG.31312	ENSG00000128482	0.575784	3.62936	2.65401	0.00385583
783	ACE	MSTRG.32446	ENSG00000159640	3.98039	13.2667	1.73657	0.00389062
784	CSDC2	MSTRG.38729	ENSG00000172346	0.660025	5.05093	2.93406	0.00389185
785	SMG5	MSTRG.2695	ENSG00000198952	13.3484	19.5458	0.550161	0.0039035
786	ZNF818P	MSTRG.36084	ENSG00000269001	0.893653	1.70453	0.93082	0.0039035
787	TMBIM6	MSTRG.24255	ENSG00000139644	136.279	197.767	0.53723	0.00403649
788	ATF3	MSTRG.3457	ENSG00000162772	1.79582	5.123	1.51182	0.00410476
789	NDFIP1	MSTRG.11973	ENSG00000131507	18.9714	30.1573	0.668654	0.00413721
790	OLR1	MSTRG.23837	ENSG00000173391	0	1.63473	10.6757	0.00413721
791	LAPTM4A	MSTRG.4136	ENSG00000068697	205.841	310.979	0.595284	0.00413721
792	KYNU	MSTRG.5643	ENSG00000115919	0	0.927606	9.85892	0.00416215
793	ERLIN2	MSTRG.16760	ENSG00000147475	4.63864	9.20246	0.988164	0.00416668
794	DCLK2	MSTRG.10341	ENSG00000170390	1.2943	3.94557	1.60731	0.00418629
795	NECAB2	MSTRG.30497	ENSG00000103154	7.21919	12.8568	0.832529	0.00418629
796	PSMA1	MSTRG.21705	ENSG00000129084	37.5828	54.0415	0.523983	0.00419097
797	ANKRD10	MSTRG.26223	ENSG00000088448	1.18088	3.82763	1.69574	0.00419609
798	DENND10	MSTRG.21140	ENSG00000119979	3.77279	8.06929	1.09661	0.00422268
799	KLF4	MSTRG.18890	ENSG00000136826	6.11742	12.7372	1.05793	0.00422369
800	BBS1	MSTRG.22548	ENSG00000174483	3.02223	6.02784	0.995792	0.00422533
801	PLAAT4	MSTRG.22256	ENSG00000133321	0.236681	3.50437	3.88247	0.00424104
802	GINS1	MSTRG.36722	ENSG00000101003	0	1.86569	10.8663	0.00424954
803	NANOGNB	MSTRG.30772	ENSG00000205857	2.72395	6.04286	1.14924	0.00428071
804	HEATR1	MSTRG.3826	ENSG00000119285	0	1.8868	10.8825	0.00428308
805	CAPS	MSTRG.34048	ENSG00000105519	0.207077	1.09104	2.39183	0.00431723
806	ADAMTSL4	MSTRG.2410	ENSG00000143382	0.0892723	1.42059	3.97707	0.00432934
807	CTF1	MSTRG.29858	ENSG00000150281	5.67353	11.2675	0.989718	0.00432966
808	ZNF264	MSTRG.36229	ENSG00000083844	0.170183	1.31676	2.94448	0.00433828
809	VPS11	MSTRG.23361	ENSG00000160695	2.43926	5.38863	1.14315	0.0043689
810	TMEM68	MSTRG.16929	ENSG00000167904	0.972208	2.85093	1.55112	0.00439
811	KLHL12	MSTRG.3306	ENSG00000117153	5.95729	11.35	0.929846	0.00439
812	LRP12	MSTRG.17428	ENSG00000147650	0.543428	7.00544	3.68587	0.00440241
813	PIBF1	MSTRG.25988	ENSG00000083535	0.0715163	1.2613	4.12161	0.00451078
814	DKK2	MSTRG.9970	ENSG00000155011	0.108908	1.18648	3.43353	0.00451078
815	PCNA	MSTRG.36576	ENSG00000132646	41.2704	58.468	0.502528	0.00451626
816	GSTM5	MSTRG.1942	ENSG00000134201	17.5565	28.2744	0.68746	0.00460457
817	ZNF655	MSTRG.15508	ENSG00000197343	1.09547	2.35005	1.10044	0.0046047
818	CYP2J2	MSTRG.1445	ENSG00000134716	0	1.11234	10.1207	0.00467092
819	CBX4	MSTRG.32794	ENSG00000141582	2.20338	5.97869	1.4397	0.00468835
820	SNX7	MSTRG.1838	ENSG00000162627	6.79779	11.517	0.760539	0.00471459
821	DNAJC12	MSTRG.20324	ENSG00000108176	0.0410255	0.915369	4.44659	0.00473246
822	BATF3	MSTRG.3464	ENSG00000123685	0.20226	1.55937	2.94049	0.00473246
823	CNPY4	MSTRG.15543	ENSG00000166997	12.737	23.0375	0.854909	0.00474239
824	RBM18	MSTRG.19115	ENSG00000119446	2.79918	5.73107	1.03354	0.00481784
825	APLP1	MSTRG.35094	ENSG00000105290	2.88125	11.7731	2.03035	0.00482995
826	SAMHD1	MSTRG.36977	ENSG00000101347	0.936545	11.0117	3.55413	0.00482995
827	SLC38A11	MSTRG.5784	ENSG00000169507	0.0619955	1.96165	4.96141	0.00483372
828	ARHGAP24	MSTRG.9808	ENSG00000138639	0.374727	1.33277	1.82775	0.00486191
829	MTX2	MSTRG.5917	ENSG00000128654	14.1199	21.0236	0.57425	0.00486581
830	MARF1	MSTRG.29513	ENSG00000166783	0.00109351	0.0124096	2.67927	0.00487608
831	CALHM2	MSTRG.20999	ENSG00000138172	5.53876	9.23213	0.736995	0.00491235
832	TMEM178A	MSTRG.4467	ENSG00000152154	0.258939	0.591959	1.18976	0.00491235
833	UNC5B	MSTRG.20411	ENSG00000107731	5.91739	20.1138	1.76498	0.00492149
834	TOR1AIP1	MSTRG.3072	ENSG00000143337	7.69734	16.8237	1.12796	0.00493679
835	NCKAP1	MSTRG.6019	ENSG00000061676	1.75474	5.25525	1.58196	0.00493679
836	CCDC90B	MSTRG.22962	ENSG00000137500	4.01716	7.92374	0.97983	0.00493925
837	PEX12	MSTRG.31624	ENSG00000108733	0.6157	3.00494	2.28517	0.00493925
838	IFRD1	MSTRG.15798	ENSG00000006652	1.55266	4.9494	1.67187	0.00496669
839	TRPA1	MSTRG.17077	ENSG00000104321	12.515	62.4855	2.31977	0.00497806
840	SEC11C	MSTRG.33391	ENSG00000166562	13.6188	29.5265	1.11635	0.0050152
841	LRFN5	MSTRG.26622	ENSG00000165379	0.0747611	0.740342	3.29061	0.00507427
842	PNPT1	MSTRG.4664	ENSG00000138035	1.51774	5.83368	1.94178	0.00512899
843	FN1	MSTRG.6337	ENSG00000115414	1074.49	1961.49	0.868301	0.00513281
844	COG3	MSTRG.25858	ENSG00000136152	0.902927	5.51237	2.60866	0.00514486
845	DGLUCY	MSTRG.27256	ENSG00000133943	1.26773	3.08381	1.28179	0.00521934
846	MARCHF6	MSTRG.10687	ENSG00000145495	1.11976	3.83857	1.77647	0.0052309
847	HS1BP3	MSTRG.4148	ENSG00000118960	3.31814	10.1631	1.6146	0.00524798
848	MCFD2	MSTRG.4574	ENSG00000180398	26.6568	57.3347	1.10487	0.00528276
849	FBXO8	MSTRG.10472	ENSG00000164117	1.39456	3.22696	1.20978	0.00533073
850	TMEM51	MSTRG.372	ENSG00000171729	1.59105	5.24368	1.71997	0.00533979
851	ERBIN	MSTRG.11118	ENSG00000112851	0.0382796	1.70237	5.43847	0.00537777
852	TMEM245	MSTRG.18907	ENSG00000106771	2.24181	7.27944	1.69872	0.00537777
853	PYURF	MSTRG.9855	ENSG00000145337	30.856	48.0412	0.638704	0.00537777
854	PCMTD1	MSTRG.16902	ENSG00000168300	0.0638674	0.450559	2.79935	0.00538285
855	YAP1	MSTRG.23103	ENSG00000137693	7.63587	20.7721	1.44366	0.00540018
856	CCDC74B	MSTRG.5545	ENSG00000152076	0.1731	0.920362	2.40385	0.00541671
857	KCNS2	MSTRG.17303	ENSG00000156486	0.207951	1.93916	3.21494	0.00553608
858	NAP1L3	MSTRG.39658	ENSG00000186310	0.298961	2.45026	3.03068	0.00553608
859	SLC6A17	MSTRG.1956	ENSG00000197106	0	2.53916	11.3107	0.00555487
860	POMT1	MSTRG.19422	ENSG00000130714	6.35699	10.9116	0.779347	0.00559889
861	RBL2	MSTRG.30015	ENSG00000103479	0	3.87196	11.9192	0.00562196
862	SYPL1	MSTRG.15737	ENSG00000008282	14.6821	33.3826	1.18498	0.00562495
863	TMEM209	MSTRG.15962	ENSG00000146842	0.369298	4.35287	3.55554	0.00562495
864	TRIM45	MSTRG.2114	ENSG00000134253	0.277874	1.46731	2.39647	0.00562495
865	TCP11L1	MSTRG.21837	ENSG00000176148	2.21366	5.11057	1.20668	0.00562495
866	CCDC71L	MSTRG.15746	ENSG00000253276	4.61147	7.93007	0.781975	0.00563366
867	ARPIN	MSTRG.28827	ENSG00000242498	3.98372	6.42034	0.688397	0.00564437
868	IRS2	MSTRG.26191	ENSG00000185950	3.14053	6.93322	1.14227	0.00564831
869	OR1F12P	MSTRG.35658	ENSG00000220721	0.0785546	1.16519	3.87372	0.00565355
870	IRF2BPL	MSTRG.27178	ENSG00000119669	8.66815	14.6225	0.754326	0.00565863
871	ZFP36L2	MSTRG.4515	ENSG00000152518	23.8955	46.4633	0.959327	0.00565863
872	SLC38A2	MSTRG.24137	ENSG00000134294	27.271	74.3615	1.44716	0.00568537
873	GPBP1	MSTRG.11026	ENSG00000062194	3.83699	9.55228	1.31565	0.00570083
874	RAB28	MSTRG.9272	ENSG00000157869	3.18787	6.53237	1.03478	0.00570196
875	RHNO1	MSTRG.23598	ENSG00000171792	8.64641	14.7516	0.770625	0.00574883
876	GNG2	MSTRG.26725	ENSG00000186469	0.469987	1.43768	1.61099	0.00575283
877	RAB6C	MSTRG.22802	ENSG00000222014	16.3093	33.8317	1.05263	0.00576338
878	COQ5	MSTRG.25312	ENSG00000110871	9.60774	14.8638	0.629479	0.00581206
879	ZCCHC4	MSTRG.9369	ENSG00000168228	0.300447	1.71598	2.5099	0.00582486
880	NUP42	MSTRG.14545	ENSG00000136243	3.56673	7.12372	0.997827	0.00584304
881	CASP8	MSTRG.6197	ENSG00000064012	0.993186	2.97041	1.57956	0.00597203
882	CD40	MSTRG.37147	ENSG00000101017	0.540486	2.30003	2.08728	0.00597713
883	PLSCR1	MSTRG.8401	ENSG00000188313	0.864576	3.98328	2.20259	0.00597713
884	LMO7	MSTRG.26002	ENSG00000136153	0.54033	4.09692	2.92031	0.00599086
885	LRRC8D	MSTRG.1723	ENSG00000171492	0.0715175	1.20181	4.05194	0.00599517
886	IKBIP	MSTRG.24933	ENSG00000166130	10.7415	16.7952	0.644804	0.00606396
887	CNIH1	MSTRG.26769	ENSG00000100528	8.85558	15.4336	0.801345	0.00608016
888	MMP10	MSTRG.23126	ENSG00000166670	1.01816	8.93917	3.13292	0.00609479
889	SLC35G2	MSTRG.8292	ENSG00000168917	1.18702	2.24149	0.916537	0.00613431
890	ZNF486	MSTRG.34838	ENSG00000256229	0.190475	1.58633	3.05137	0.00616492
891	SUCO	MSTRG.2945	ENSG00000094975	0	3.60168	11.8149	0.00620959
892	RSRP1	MSTRG.604	ENSG00000117616	2.51332	4.25016	0.757688	0.00625923
893	TENT4B	MSTRG.29973	ENSG00000121274	0.00291809	1.50411	8.5855	0.00637179
894	LMAN1	MSTRG.33393	ENSG00000074695	17.0926	31.4278	0.878633	0.00643398
895	PAPSS1	MSTRG.9971	ENSG00000138801	15.999	23.9895	0.584389	0.006438
896	ZNF331	MSTRG.36092	ENSG00000130844	0.326014	1.65236	2.33798	0.00646045
897	STMN3	MSTRG.37413	ENSG00000197457	7.82536	16.2755	1.05638	0.00646045
898	CDO1	MSTRG.11593	ENSG00000129596	0.0350855	0.451454	3.64828	0.0064774
899	WFDC1	MSTRG.30506	ENSG00000103175	27.2863	55.4806	1.02378	0.00650571
900	DMPK	MSTRG.35670	ENSG00000104936	9.53718	12.5448	0.395421	0.00667707
901	AHCYL1	MSTRG.1949	ENSG00000168710	11.6794	20.501	0.811669	0.00674563
902	THAP11	MSTRG.30232	ENSG00000168286	10.0762	15.6006	0.630604	0.00674563
903	HECTD4	MSTRG.25171	ENSG00000173064	0.0209965	0.26447	3.5932	0.00679562
904	EPDR1	MSTRG.14778	ENSG00000086289	3.86624	15.3957	1.99325	0.00685905
905	MIA2	MSTRG.26614	ENSG00000150527	0.0680078	1.01131	3.87474	0.00686338
906	PIK3R3	MSTRG.1234	ENSG00000117461	0.350249	7.82871	4.47839	0.00694942
907	HAPLN1	MSTRG.11375	ENSG00000145681	0	1.18536	10.2123	0.00695445
908	PGAP4	MSTRG.18843	ENSG00000165152	3.74167	6.68092	0.836192	0.0070036
909	LIMK2	MSTRG.38422	ENSG00000182541	0.167904	1.26991	2.91158	0.0070036
910	CKLF	MSTRG.30129	ENSG00000217555	4.81669	6.76322	0.489583	0.00705503
911	ACOT2	MSTRG.27074	ENSG00000119673	5.09822	9.46827	0.892976	0.0070668
912	LYNX1	MSTRG.17660	ENSG00000180155	12.5551	20.3876	0.699373	0.00708065
913	TRAM1L1	MSTRG.10059	ENSG00000174599	0.621864	2.2911	1.87968	0.0071348
914	ALG8	MSTRG.22915	ENSG00000159063	9.20469	16.6921	0.858654	0.0071348
915	CMAS	MSTRG.23978	ENSG00000111726	9.35136	15.8459	0.7608	0.00719902
916	TPCN1	MSTRG.25195	ENSG00000186815	7.76394	18.6827	1.26673	0.00722519
917	ENO3	MSTRG.30903	ENSG00000108515	0.126727	1.57895	3.62874	0.00724065
918	RNF19B	MSTRG.861	ENSG00000116514	1.17293	2.45049	1.06232	0.0073224
919	REEP5	MSTRG.11553	ENSG00000129625	25.0835	34.958	0.478867	0.0073347
920	CCDC28A-AS1	MSTRG.17435	ENSG00000279968	0.0245387	0.757497	4.89239	0.00733738
921	PIGH	MSTRG.26950	ENSG00000100564	3.57098	7.18125	1.00771	0.007382
922	SELENOF	MSTRG.1697	ENSG00000183291	38.405	64.6313	0.750925	0.00739609
923	PAPPA	MSTRG.19067	ENSG00000182752	1.45705	9.00731	2.62722	0.00742158
924	AUH	MSTRG.18611	ENSG00000148090	0.212948	0.744281	1.80053	0.00746586
925	ROM1	MSTRG.22211	ENSG00000149489	1.38276	3.49377	1.3366	0.00752305
926	TRIM25	MSTRG.32300	ENSG00000121060	4.21199	21.1529	2.32801	0.00752305
927	DCAF16	MSTRG.9314	ENSG00000163257	0.541175	1.96729	1.86011	0.00752592
928	ANKHD1	MSTRG.11924	ENSG00000131503	0.942045	4.62713	2.29503	0.00760512
929	ITGA4	MSTRG.6009	ENSG00000115232	7.59625	18.0129	1.24556	0.00762595
930	CRY2	MSTRG.21954	ENSG00000121671	0.653275	4.82066	2.88156	0.00763952
931	TWSG1	MSTRG.33072	ENSG00000128791	8.04493	19.9828	1.3125	0.00768107
932	TMCO4	MSTRG.470	ENSG00000162542	1.22831	3.00203	1.28857	0.0076937
933	BAIAP2L1	MSTRG.15473	ENSG00000006453	1.25007	5.74361	2.19904	0.00770888
934	TUBG2	MSTRG.31832	ENSG00000037042	10.2406	19.4292	0.923854	0.00772108
935	SCUBE2	MSTRG.21608	ENSG00000175356	1.21069	6.27776	2.37346	0.00772886
936	RPA2	MSTRG.726	ENSG00000117748	11.9768	19.8773	0.730826	0.00776963
937	TMEM167B	MSTRG.1903	ENSG00000215717	9.53926	16.2385	0.767406	0.00787271
938	MICU1	MSTRG.20441	ENSG00000107745	9.12172	15.0771	0.724917	0.00790563
939	TMED5	MSTRG.1766	ENSG00000117500	4.16268	10.771	1.37136	0.00791234
940	CSRNP2	MSTRG.24292	ENSG00000110925	2.7284	5.04405	0.886285	0.007973
941	CHSY3	MSTRG.11698	ENSG00000198108	0.0304378	0.199264	2.67133	0.00797312
942	ZC3HAV1	MSTRG.16104	ENSG00000105939	2.35514	12.3002	2.38431	0.00798818
943	ACOT4	MSTRG.27079	ENSG00000177465	0.473511	2.20765	2.21865	0.00798818
944	EPC2	MSTRG.5654	ENSG00000135999	0.0181085	1.09547	5.84251	0.00803089
945	KCTD9	MSTRG.16632	ENSG00000104756	3.70535	7.94343	1.09994	0.00805981
946	RAD17	MSTRG.11159	ENSG00000152942	0	1.26069	10.3011	0.00811457
947	SWAP70	MSTRG.21624	ENSG00000133789	7.68394	13.8735	0.852326	0.0082571
948	HS6ST1	MSTRG.5542	ENSG00000136720	9.6731	16.8348	0.799335	0.0082571
949	SP110	MSTRG.6532	ENSG00000135899	0.83654	3.02188	1.85169	0.00829104
950	FKBP9	MSTRG.14960	ENSG00000122642	0.498681	2.11245	2.08052	0.0083027
951	PLCD3	MSTRG.32022	ENSG00000161714	6.86234	13.1488	0.938054	0.00836488
952	BMP2K	MSTRG.9752	ENSG00000138756	0.0868002	1.43378	4.03046	0.00838095
953	GRN	MSTRG.31987	ENSG00000030582	169.262	209.105	0.304971	0.00841089
954	PIP4P1	MSTRG.26315	ENSG00000165782	5.03152	9.16202	0.864541	0.00848182
955	RAB18	MSTRG.19966	ENSG00000099246	5.30895	12.3838	1.2218	0.00851464
956	TXNDC15	MSTRG.11799	ENSG00000113621	23.8587	33.4435	0.487196	0.0085458
957	PWWP2B	MSTRG.21278	ENSG00000171813	1.47449	3.2356	1.13328	0.00856565
958	KANK1	MSTRG.17833	ENSG00000107104	1.28498	4.04862	1.65492	0.00859951
959	BCAS2	MSTRG.2074	ENSG00000116752	9.16386	15.5518	0.76299	0.00861571
960	ECH1	MSTRG.35273	ENSG00000104823	23.0235	33.3735	0.535579	0.00861571
961	GSR	MSTRG.16723	ENSG00000104687	5.39921	10.5127	0.961176	0.00862579
962	TRIM56	MSTRG.15611	ENSG00000169871	2.66259	8.42503	1.66148	0.00863414
963	RBBP4	MSTRG.850	ENSG00000162521	5.82503	11.4663	0.976938	0.00863414
964	ZFC3H1	MSTRG.24731	ENSG00000133858	0.160579	1.22074	2.91862	0.00863656
965	WDR41	MSTRG.11283	ENSG00000164253	5.79668	9.89806	0.771815	0.00869339
966	CEP112	MSTRG.32510	ENSG00000154240	0.0219672	0.753432	5.03774	0.00874621
967	PRICKLE1	MSTRG.24121	ENSG00000139174	0.0679867	1.02826	3.89915	0.0089024
968	TRIQK	MSTRG.17234	ENSG00000205133	1.28784	3.335	1.37204	0.00893757
969	SLC27A6	MSTRG.11684	ENSG00000113396	0	2.14566	11.0679	0.00894271
970	MKLN1	MSTRG.15996	ENSG00000128585	0.828438	3.22904	1.96134	0.00909487
971	GORASP2	MSTRG.5836	ENSG00000115806	38.6092	53.7073	0.476163	0.00912036
972	MOK	MSTRG.27455	ENSG00000080823	0.223345	0.63628	1.50621	0.00914925
973	ZNFX1	MSTRG.37177	ENSG00000124201	4.16983	21.233	2.34797	0.00926886
974	OSBPL1A	MSTRG.33177	ENSG00000141447	1.33207	3.91879	1.55603	0.00930376
975	PVRIG	MSTRG.15556	ENSG00000213413	1.83526	4.23429	1.20569	0.00931462
976	ACVR1	MSTRG.5720	ENSG00000115170	5.19335	9.98014	0.942261	0.00931867
977	N4BP2L2	MSTRG.25703	ENSG00000244754	0.410651	0.993959	1.27322	0.00937036
978	TAFA5	MSTRG.38904	ENSG00000219438	0	1.2491	10.2878	0.00939331
979	QNG1	MSTRG.18536	ENSG00000165118	1.83573	4.80452	1.38756	0.00940727
980	TMEM116	MSTRG.25162	ENSG00000198270	0.427159	2.27697	2.41153	0.0094661
981	FBXO32	MSTRG.17531	ENSG00000156804	0.0778683	1.06632	3.7584	0.00952996
982	TRANK1	MSTRG.7125	ENSG00000168016	0	0.808185	9.66033	0.00955462
983	ZNF426	MSTRG.34221	ENSG00000130818	0.00315067	1.09948	8.05057	0.00961398
984	NOCT	MSTRG.10220	ENSG00000151014	2.70395	6.59266	1.28548	0.00966299
985	PODNL1	MSTRG.34528	ENSG00000132000	0.571226	2.0487	1.84076	0.00968373
986	CABYR	MSTRG.33175	ENSG00000154040	6.39382	11.7696	0.880209	0.00972764
987	TYSND1	MSTRG.20391	ENSG00000156521	3.69383	6.44069	0.80193	0.00977377
988	IL17D	MSTRG.25582	ENSG00000172458	0.335431	1.28908	1.93908	0.00985938
989	NMI	MSTRG.5680	ENSG00000123609	1.47463	3.54106	1.26326	0.0099417
990	SLC39A6	MSTRG.33244	ENSG00000141424	9.02303	34.281	1.92561	0.0101105
991	CAV2	MSTRG.15834	ENSG00000105971	32.7733	50.6756	0.628754	0.0101695
992	OSGIN2	MSTRG.17205	ENSG00000164823	0.346541	2.08988	2.58885	0.0101695
993	ELMOD2	MSTRG.10266	ENSG00000179387	1.03088	2.74549	1.41231	0.0101974
994	BLOC1S2	MSTRG.20877	ENSG00000196072	9.75479	16.2829	0.739119	0.0102513
995	RAB11FIP5	MSTRG.4895	ENSG00000135631	11.4597	21.3509	0.897671	0.0102513
996	SAV1	MSTRG.10311	ENSG00000151748	0	1.2252	10.26	0.0102733
997	TMEM54	MSTRG.859	ENSG00000121900	11.9487	18.0401	0.594307	0.0103475
998	PIGU	MSTRG.36880	ENSG00000101464	13.6042	21.5264	0.662016	0.0103695
999	MCOLN1	MSTRG.34108	ENSG00000090674	9.46799	17.3718	0.875551	0.010441
1000	PRKAR1A	MSTRG.32551	ENSG00000108946	20.7704	37.2543	0.842846	0.0104435
1001	UBLCP1	MSTRG.12231	ENSG00000164332	5.05776	10.911	1.10905	0.0104562
1002	EBAG9	MSTRG.17452	ENSG00000147654	1.47561	3.31004	1.165	0.0104562
1003	DENND5A	MSTRG.21611	ENSG00000184014	8.81719	16.7164	0.922801	0.0104562
1004	SNX5	MSTRG.36649	ENSG00000089006	9.28413	16.9001	0.864123	0.0104666
1005	PSMG2	MSTRG.33118	ENSG00000128789	11.2025	15.0929	0.430011	0.0105493
1006	SBDS	MSTRG.15112	ENSG00000126524	8.03341	13.9297	0.794002	0.0105886
1007	CAMLG	MSTRG.11796	ENSG00000164615	6.35481	10.8112	0.766517	0.0106234
1008	ANKH	MSTRG.10718	ENSG00000154122	3.03398	6.12959	1.01434	0.010624
1009	STT3A	MSTRG.23464	ENSG00000134910	12.0569	17.7081	0.554514	0.0106342
1010	ELF1	MSTRG.25784	ENSG00000120690	0.93285	4.13088	2.14553	0.0106423
1011	RAP1BL	MSTRG.11263	ENSG00000254893	3.87246	8.39023	1.11526	0.0106762
1012	GNAI1	MSTRG.15326	ENSG00000127955	2.23276	4.57196	1.03366	0.0106806
1013	RNF19A	MSTRG.17345	ENSG00000034677	0.278934	1.68792	2.59294	0.0107853
1014	SH3PXD2B	MSTRG.12290	ENSG00000174705	0	2.92838	11.5164	0.0108345
1015	PWWP2A	MSTRG.12235	ENSG00000170234	0.374315	1.22701	1.71014	0.0108613
1016	SPP1	MSTRG.9836	ENSG00000118785	0.204956	2.34626	3.51057	0.0108613
1017	COL14A1	MSTRG.17497	ENSG00000187955	1.10603	13.0343	3.55766	0.0108935
1018	CTSS	MSTRG.2439	ENSG00000163131	0.43262	3.03043	2.8055	0.0109155
1019	CRIM1	MSTRG.4394	ENSG00000150938	9.08588	17.9587	0.982908	0.0109683
1020	SPTLC1	MSTRG.18615	ENSG00000090054	2.57434	7.08249	1.4597	0.0110087
1021	RAD21	MSTRG.17464	ENSG00000164754	7.59998	16.8579	1.14926	0.0110514
1022	DDIT4	MSTRG.20436	ENSG00000168209	8.90073	20.8431	1.22748	0.0110514
1023	C1orf115	MSTRG.3513	ENSG00000162817	15.503	28.9284	0.899894	0.0110514
1024	FANCL	MSTRG.4678	ENSG00000115392	1.1321	3.04894	1.4285	0.0110514
1025	METTL8	MSTRG.5846	ENSG00000123600	0.344956	1.62357	2.2314	0.0110514
1026	LIMCH1	MSTRG.9440	ENSG00000064042	0	2.32442	11.1833	0.0110514
1027	MANBA	MSTRG.9937	ENSG00000109323	1.13399	6.69856	2.56139	0.0110514
1028	ARSB	MSTRG.11299	ENSG00000113273	2.02503	3.81654	0.913986	0.0111163
1029	TMEM70	MSTRG.17106	ENSG00000175606	4.81977	8.69387	0.850899	0.0111163
1030	RIPOR3	MSTRG.37208	ENSG00000042062	0	0.850551	9.73395	0.0111163
1031	CPT1A	MSTRG.22670	ENSG00000110090	2.43647	9.50386	1.96328	0.0111543
1032	SIX1	MSTRG.26861	ENSG00000126778	1.98683	4.44698	1.16195	0.0112035
1033	SNX18	MSTRG.10975	ENSG00000178996	1.23693	2.80012	1.17808	0.0112569
1034	DIRAS2	MSTRG.18607	ENSG00000165023	0.0195762	1.58498	6.26825	0.0112705
1035	CLIP1	MSTRG.25376	ENSG00000130779	0.939903	5.2786	2.48831	0.0112705
1036	SMARCA5	MSTRG.10301	ENSG00000153147	4.19902	12.0685	1.5229	0.0113146
1037	GLT8D2	MSTRG.24993	ENSG00000120820	2.91089	5.67775	0.963616	0.0114792
1038	MATR3	MSTRG.11883	ENSG00000015479	5.80384	11.1183	0.937731	0.0114983
1039	SLC27A3	MSTRG.2553	ENSG00000143554	0.91682	2.46167	1.42394	0.0114983
1040	GADD45A	MSTRG.1533	ENSG00000116717	43.0238	57.1136	0.408691	0.0114984
1041	PAN2	MSTRG.24517	ENSG00000135473	0.310021	1.417	2.18877	0.0114984
1042	NOMO3	MSTRG.29520	ENSG00000103226	13.579	19.6992	0.536726	0.0114984
1043	PAMR1	MSTRG.21888	ENSG00000149090	23.7747	50.8963	1.0981	0.0115841
1044	TMEM33	MSTRG.9441	ENSG00000109133	2.14839	5.53177	1.36408	0.0115888
1045	MFSD14A	MSTRG.1850	ENSG00000156875	6.64596	14.9773	1.17211	0.0116814
1046	PIGT	MSTRG.37101	ENSG00000124155	69.256	98.1805	0.503491	0.0116981
1047	MCL1	MSTRG.2414	ENSG00000143384	48.4861	69.0979	0.511062	0.0117285
1048	UFM1	MSTRG.25755	ENSG00000120686	6.8432	14.2628	1.05941	0.0117663
1049	JRKL	MSTRG.23077	ENSG00000183340	1.78088	3.83601	1.10658	0.0118199
1050	VSTM2L	MSTRG.36994	ENSG00000132821	0.0955153	1.64875	4.09535	0.0118512
1051	PIGN	MSTRG.33414	ENSG00000197563	0.572029	1.47	1.36011	0.0118832
1052	ADH5	MSTRG.9909	ENSG00000197894	43.9636	64.038	0.542608	0.0119571
1053	UBE2Q1	MSTRG.2589	ENSG00000160714	21.9769	28.8948	0.394809	0.0119592
1054	TRPM7	MSTRG.28033	ENSG00000092439	0.00410982	1.7502	8.42085	0.0119592
1055	RNF103	MSTRG.5070	ENSG00000239305	10.261	16.0677	0.646941	0.0119687
1056	ODR4	MSTRG.3170	ENSG00000157181	0.381993	0.91778	1.2624	0.0120543
1057	NOL4L	MSTRG.36816	ENSG00000197183	0.433222	1.2067	1.47575	0.0120833
1058	GTF2I	MSTRG.3562	ENSG00000263001	0.239212	1.39128	2.53506	0.0120933
1059	CSAD	MSTRG.24369	ENSG00000139631	0.592343	1.92911	1.70174	0.0120987
1060	SIRT3	MSTRG.21336	ENSG00000142082	1.37052	2.72707	0.992102	0.0121196
1061	CBR4	MSTRG.10444	ENSG00000145439	1.08405	2.45845	1.18057	0.0121258
1062	NAGLU	MSTRG.31821	ENSG00000108784	21.9251	30.99	0.499198	0.0121258
1063	CSNK2A1	MSTRG.36435	ENSG00000101266	3.46038	4.6233	0.417889	0.0121258
1064	HINT2	MSTRG.18226	ENSG00000137133	14.284	22.8919	0.680394	0.0121382
1065	PIK3IP1	MSTRG.38423	ENSG00000100100	3.30328	15.7053	2.24894	0.0121491
1066	PRXL2C	MSTRG.18736	ENSG00000158122	3.70981	6.80751	0.875603	0.0121956
1067	MTERF3	MSTRG.17274	ENSG00000156469	4.98484	8.99421	0.851322	0.0122274
1068	FAM187A	MSTRG.32013	ENSG00000214447	0.263795	1.46844	2.47232	0.0122903
1069	PPM1D	MSTRG.32388	ENSG00000170836	0.473338	2.46891	2.38047	0.0122903
1070	CETN3	MSTRG.11401	ENSG00000153140	1.80261	4.11932	1.19187	0.0123886
1071	C16orf89	MSTRG.10144	ENSG00000153446	0.122277	0.558689	2.18272	0.012561
1072	SLFN11	MSTRG.31617	ENSG00000172716	0.932401	6.3878	2.77498	0.0125704
1073	ATP8B2	MSTRG.2584	ENSG00000143515	6.56271	14.7625	1.16945	0.0126082
1074	DACT3	MSTRG.35712	ENSG00000197380	0.985371	4.78383	2.27827	0.0126658
1075	WHAMM	MSTRG.41381	ENSG00000156232	0.0483069	0.738039	3.90579	0.0126714
1076	FNDC4	MSTRG.4289	ENSG00000115226	11.8939	18.9591	0.672625	0.0127257
1077	DPY19L3	MSTRG.34986	ENSG00000178904	0	1.59931	10.6441	0.012726
1078	SOWAHC	MSTRG.5314	ENSG00000198142	0.967894	2.67107	1.46355	0.012726
1079	CASP6	MSTRG.9994	ENSG00000138794	1.13413	2.01108	0.825826	0.0127741
1080	ANGPTL2	MSTRG.19186	ENSG00000136859	4.84923	9.16782	0.918684	0.012856
1081	SYTL2	MSTRG.22977	ENSG00000137501	0.172924	0.759253	2.12802	0.0129591
1082	PRTFDC1	MSTRG.19944	ENSG00000099256	1.31334	2.70384	1.04121	0.0129708
1083	WNT9A	MSTRG.3641	ENSG00000143816	0.385077	3.33287	3.11024	0.0129708
1084	SOAT1	MSTRG.3066	ENSG00000057252	2.00395	5.09141	1.34478	0.0129819
1085	TRIM23	MSTRG.11112	ENSG00000113595	0	1.31716	10.3643	0.0130318
1086	PURA	MSTRG.11905	ENSG00000185129	0.674086	1.75013	1.37514	0.0131039
1087	CLMP	MSTRG.23428	ENSG00000166250	21.9163	43.4099	0.985989	0.0131127
1088	ISCA1	MSTRG.18559	ENSG00000135070	5.8165	9.38247	0.689721	0.0131313
1089	TMEM230	MSTRG.36569	ENSG00000089063	17.849	28.6691	0.683627	0.0131313
1090	FAM241B	MSTRG.20382	ENSG00000171224	0	0.859887	9.74968	0.0132204
1091	ATAD1	MSTRG.20650	ENSG00000138138	1.6843	4.24844	1.33427	0.0133448
1092	BORCS7	MSTRG.20981	ENSG00000166275	3.48891	6.66162	0.932901	0.0134102
1093	RAET1G	MSTRG.14016	ENSG00000203722	0.0797756	0.707001	3.13176	0.0134909
1094	MMP1	MSTRG.23128	ENSG00000196611	73.4133	307.285	2.06545	0.0135145
1095	ATOH8	MSTRG.5055	ENSG00000168874	0.150688	1.04716	2.78868	0.0135475
1096	LIMK1	MSTRG.15173	ENSG00000106683	21.2378	29.536	0.475821	0.0135638
1097	TMEM107	MSTRG.31046	ENSG00000179029	3.11975	6.08472	0.963538	0.0135908
1098	MTDH	MSTRG.17289	ENSG00000147649	5.65481	10.8745	0.943283	0.0136088
1099	CDC14B	MSTRG.18734	ENSG00000081377	0	1.33228	10.3808	0.0136088
1100	TBK1	MSTRG.24658	ENSG00000183735	0.401971	3.8117	3.24206	0.0136379
1101	DENND4B	MSTRG.2557	ENSG00000198837	0.99219	3.51126	1.82226	0.0136446
1102	PRKAB2	MSTRG.2292	ENSG00000131791	0.110604	2.95542	4.72738	0.0137754
1103	MSANTD4	MSTRG.23155	ENSG00000170903	2.74975	5.50005	0.999879	0.0137754
1104	SFXN5	MSTRG.4894	ENSG00000144040	1.94332	5.01389	1.36696	0.0137925
1105	BROX	MSTRG.3547	ENSG00000162819	1.46312	4.57456	1.64392	0.0138563
1106	DUSP15	MSTRG.36800	ENSG00000149599	0.154532	0.599646	1.94931	0.0139146
1107	ARHGAP5-AS1	MSTRG.26520	ENSG00000258655	0.717668	2.17134	1.59585	0.0139609
1108	AGA	MSTRG.10501	ENSG00000038002	10.0432	16.2497	0.694138	0.0139886
1109	BOC	MSTRG.7991	ENSG00000144857	1.36538	3.50303	1.35866	0.0139922
1110	ZNF706	MSTRG.17367	ENSG00000120963	5.38216	8.64509	0.683597	0.0140237
1111	GPR153	MSTRG.228	ENSG00000158292	3.86644	10.3079	1.41444	0.0140237
1112	NOMO2	MSTRG.29531	ENSG00000185164	13.1421	20.3611	0.631581	0.0140237
1113	INHBA	MSTRG.14805	ENSG00000122641	0.0356502	2.20609	5.91218	0.0140693
1114	SYT1	MSTRG.24788	ENSG00000067715	0	0.261746	8.03752	0.0140693
1115	DOK4	MSTRG.30083	ENSG00000125170	7.7142	11.252	0.54453	0.0140693
1116	PANK2	MSTRG.36548	ENSG00000125779	1.45194	2.98366	1.03859	0.0140693
1117	PJVK	MSTRG.5971	ENSG00000204311	0.0496192	0.621268	3.61978	0.0140693
1118	HSBP1L1	MSTRG.33565	ENSG00000226742	6.45976	10.7785	0.738509	0.0141341
1119	SALL1	MSTRG.29988	ENSG00000103449	0.990809	8.97122	3.17733	0.014161
1120	CES3	MSTRG.30153	ENSG00000172828	0	1.11216	10.1204	0.014161
1121	TNFRSF14	MSTRG.186	ENSG00000157873	1.34931	2.90608	1.10628	0.0141737
1122	ATL3	MSTRG.22261	ENSG00000184743	7.4679	16.4373	1.13809	0.0141784
1123	NT5M	MSTRG.31235	ENSG00000205309	0.138161	0.895543	2.68762	0.0142092
1124	UVSSA	MSTRG.9046	ENSG00000163945	0.211526	0.59022	1.47606	0.014219
1125	PFKM	MSTRG.24179	ENSG00000152556	6.26677	11.8427	0.918094	0.0142262
1126	ZNF841	MSTRG.36039	ENSG00000197608	0.370668	1.01642	1.45283	0.0142317
1127	ANKRD42	MSTRG.22955	ENSG00000137494	0.851824	2.19992	1.36779	0.0143012
1128	MPP4	MSTRG.6212	ENSG00000082126	0	1.16394	10.186	0.0143299
1129	PYCR2	MSTRG.3603	ENSG00000143811	30.4635	38.9915	0.356068	0.014491
1130	MX2	MSTRG.37748	ENSG00000183486	0	12.3241	13.5893	0.0144913
1131	DDIT3	MSTRG.24583	ENSG00000175197	4.84655	11.9383	1.30039	0.0145152
1132	TNFAIP2	MSTRG.27485	ENSG00000185215	1.01115	5.50348	2.44318	0.0145265
1133	FAM174A	MSTRG.11490	ENSG00000174132	5.16336	8.441	0.708995	0.0145517
1134	IGFBP6	MSTRG.24367	ENSG00000167779	230.45	422.616	0.87489	0.0145517
1135	HOXC4	MSTRG.24417	ENSG00000198353	1.21902	2.27956	0.902479	0.0146105
1136	PKD1	MSTRG.29528	ENSG00000008710	0.411836	0.994567	1.26995	0.0147195
1137	NFAT5	MSTRG.30294	ENSG00000102908	0	1.59539	10.6406	0.0147223
1138	TMEM62	MSTRG.27903	ENSG00000137842	1.54145	5.64615	1.8723	0.0149262
1139	IGFBP2	MSTRG.6363	ENSG00000115457	235.69	486.781	1.04638	0.0149706
1140	SEPTIN7	MSTRG.14909	ENSG00000122545	0.26109	1.60032	2.61113	0.0150034
1141	ASH2L	MSTRG.16783	ENSG00000129691	6.28548	10.1139	0.686152	0.0150034
1142	NUP160	MSTRG.22033	ENSG00000030066	0.164485	1.61196	3.28494	0.0150034
1143	H2AC18	MSTRG.2363	ENSG00000288825	25.6984	46.6581	0.860423	0.0150034
1144	H2AC19		ENSG00000288859
1145	APOE	MSTRG.35586	ENSG00000130203	9.60182	34.5961	1.84912	0.0150034
1146	TAX1BP1	MSTRG.14627	ENSG00000106052	15.0108	22.6188	0.591489	0.0151243
1147	SNRK	MSTRG.7258	ENSG00000163788	0	2.26244	11.1443	0.0151243
1148	SCRN3	MSTRG.5868	ENSG00000144306	0.874484	2.43494	1.47633	0.0152085
1149	RHBDD1	MSTRG.6500	ENSG00000144468	0.576732	1.36233	1.23866	0.0152744
1150	NUFIP2	MSTRG.31443	ENSG00000108256	2.57076	6.95785	1.43609	0.0153524
1151	SLC1A4	MSTRG.4770	ENSG00000115902	7.17038	12.0824	0.752706	0.0153818
1152	NCS1	MSTRG.19390	ENSG00000107130	19.3773	26.4652	0.449711	0.0154472
1153	PPWD1	MSTRG.11107	ENSG00000113593	3.95794	6.77036	0.774331	0.0155071
1154	MPHOSPH6	MSTRG.30487	ENSG00000135698	6.4202	15.9952	1.31681	0.0156664
1155	RAD23B	MSTRG.18884	ENSG00000119318	27.5721	43.616	0.661631	0.015747
1156	VPS41	MSTRG.14782	ENSG00000006715	2.71858	6.48498	1.25394	0.015795
1157	THAP5	MSTRG.15770	ENSG00000177683	0.162359	2.28384	3.80598	0.0158397
1158	AEBP1	MSTRG.14857	ENSG00000106624	95.9637	155.524	0.696573	0.0158839
1159	ZNF862	MSTRG.16263	ENSG00000106479	0.0624134	0.663311	3.389	0.0159214
1160	CYTH3	MSTRG.14402	ENSG00000008256	5.55053	15.3435	1.46677	0.016
1161	ARL6IP1	MSTRG.29539	ENSG00000170540	19.3795	41.833	1.11007	0.016
1162	C8orf48	MSTRG.16485	ENSG00000164743	1.33082	3.32636	1.32098	0.0161619
1163	SPCS2	MSTRG.730	ENSG00000118363	5.09386	8.63574	0.761445	0.0161841
1164	AIDA	MSTRG.3546	ENSG00000186063	13.7369	26.8506	0.966843	0.01625
1165	ICAM5	MSTRG.34270	ENSG00000105376	3.38469	6.6511	0.97436	0.0162506
1166	TRIM14	MSTRG.18785	ENSG00000106785	0.996591	6.78221	2.76545	0.0164491
1167	TBCK	MSTRG.9968	ENSG00000145348	0.203116	1.46999	2.84932	0.0165649
1168	RFX5	MSTRG.2481	ENSG00000143390	2.33814	5.75585	1.2993	0.0165765
1169	WBP1L	MSTRG.20975	ENSG00000166272	12.7316	20.5999	0.694179	0.0165794
1170	SP100	MSTRG.6535	ENSG00000067066	1.53407	5.85613	1.93189	0.0165794
1171	FLT3LG	MSTRG.35901	ENSG00000090554	2.36635	5.50131	1.21677	0.0165912
1172	FBXO33	MSTRG.26616	ENSG00000165355	0.737969	3.37494	2.1917	0.0166107
1173	WNT2	MSTRG.15844	ENSG00000105989	0.781035	6.09634	2.96287	0.0166447
1174	FIBIN	MSTRG.21792	ENSG00000176971	5.57369	10.2374	0.877026	0.0166447
1175	PARN	MSTRG.29493	ENSG00000140694	0.479426	1.03976	1.11525	0.0166454
1176	SLC25A46	MSTRG.11537	ENSG00000164209	3.96631	9.84226	1.31097	0.0166554
1177	ACAA2	MSTRG.33311	ENSG00000167315	7.89921	13.0155	0.720376	0.0166554
1178	CNP	MSTRG.31793	ENSG00000173786	15.5177	24.9138	0.683001	0.0166868
1179	HEATR6	MSTRG.32372	ENSG00000068097	0.0150593	2.28144	7.15103	0.0167171
1180	ANK2	MSTRG.10028	ENSG00000145362	0.00112956	0.177919	6.3926	0.0168662
1181	INHA	MSTRG.6463	ENSG00000123999	0.443139	1.70279	1.93967	0.016938
1182	LMO4	MSTRG.1699	ENSG00000143013	2.02087	4.15373	1.03906	0.0170051
1183	MRC2	MSTRG.32414	ENSG00000011028	66.2189	105.143	0.667035	0.0170051
1184	GNPDA2	MSTRG.9455	ENSG00000163281	1.31793	4.22478	1.67985	0.0170051
1185	RNF145	MSTRG.12227	ENSG00000145860	7.4624	14.9645	1.00373	0.0171589
1186	STAMBPL1	MSTRG.20657	ENSG00000138134	3.6938	6.41575	0.796347	0.0172762
1187	HPSE	MSTRG.9795	ENSG00000173083	0	1.17909	10.2047	0.017413
1188	ADCK2	MSTRG.16139	ENSG00000133597	5.90723	9.3561	0.663336	0.0174268
1189	ERP44	MSTRG.18824	ENSG00000023318	10.8905	17.3942	0.675485	0.0175687
1190	TRIM21	MSTRG.21504	ENSG00000132109	9.47064	25.2351	1.4138	0.0175991
1191	NAPG	MSTRG.33088	ENSG00000134265	3.15067	5.71398	0.858631	0.0176044
1192	PUM1	MSTRG.774	ENSG00000134644	1.91079	8.31246	2.12053	0.0176044
1193	MKX	MSTRG.19971	ENSG00000150051	0	1.73169	10.7588	0.0176548
1194	ARHGEF12	MSTRG.23396	ENSG00000196914	0.91619	6.16293	2.74856	0.0176984
1195	RPN2	MSTRG.36980	ENSG00000118705	85.265	110.942	0.379777	0.017699
1196	TRO	MSTRG.39434	ENSG00000067445	0.351997	1.84575	2.38726	0.017699
1197	DERL1	MSTRG.17515	ENSG00000136986	14.7887	21.2167	0.520672	0.0177189
1198	ADPRS	MSTRG.926	ENSG00000116863	22.2155	30.4018	0.452576	0.017727
1199	RAB11FIP2	MSTRG.21126	ENSG00000107560	0.356659	2.62082	2.87391	0.017733
1200	CCDC180	MSTRG.18763	ENSG00000197816	0.0298469	0.137551	2.16722	0.0178035
1201	GRIA1	MSTRG.12170	ENSG00000155511	0.408793	5.07555	3.63088	0.0180687
1202	SLC35E2B	MSTRG.135	ENSG00000189339	2.74248	4.20601	0.616786	0.0181259
1203	MAP1LC3B	MSTRG.30591	ENSG00000140941	61.3072	77.4481	0.337169	0.0181952
1204	ATOSA	MSTRG.28069	ENSG00000047346	0.0160391	0.782602	5.5232	0.018271
1205	RETREG2	MSTRG.6421	ENSG00000144567	12.5425	18.0151	0.522351	0.0183337
1206	TRAM1	MSTRG.17063	ENSG00000067167	19.6396	54.8776	1.48241	0.0183527
1207	HSPH1	MSTRG.25695	ENSG00000120694	8.44955	16.2346	0.942044	0.0183753
1208	ZFP36	MSTRG.35288	ENSG00000128016	16.6854	26.4202	0.663024	0.0183753
1209	SFXN3	MSTRG.20906	ENSG00000107819	10.5248	19.6937	0.903877	0.0183851
1210	ZEB2	MSTRG.5646	ENSG00000169554	0.334519	3.03788	3.17907	0.0184927
1211	SLFN5	MSTRG.31616	ENSG00000166750	3.22117	7.05164	1.13013	0.0186084
1212	GOLPH3L	MSTRG.2437	ENSG00000143457	2.39239	4.68216	0.968427	0.0186688
1213	ENG	MSTRG.19253	ENSG00000106991	60.2878	83.1918	0.464569	0.0187112
1214	KRT40	MSTRG.31761	ENSG00000204889	0	0.672585	9.39572	0.0187463
1215	CPSF2	MSTRG.27276	ENSG00000165934	1.73054	4.04688	1.22511	0.0188016
1216	TVP23B	MSTRG.31288	ENSG00000171928	4.42968	8.69965	0.973594	0.0188076
1217	UBL3	MSTRG.25685	ENSG00000122042	5.96103	10.8534	0.864409	0.0188355
1218	MLEC	MSTRG.25317	ENSG00000110917	19.6164	27.5031	0.487515	0.0188434
1219	ANGPT1	MSTRG.17439	ENSG00000154188	2.43157	6.77646	1.47826	0.0188601
1220	RIOX1	MSTRG.27067	ENSG00000170468	4.74667	6.5982	0.475073	0.0188601
1221	MMP3	MSTRG.23129	ENSG00000149968	58.1977	234.724	2.01192	0.0189066
1222	MAPK7	MSTRG.31309	ENSG00000166484	4.11357	7.52249	0.870659	0.0189722
1223	PABIR1	MSTRG.18419	ENSG00000187866	1.66137	3.57924	1.10681	0.0189814
1224	HBP1	MSTRG.15749	ENSG00000105856	1.00256	3.31149	1.72279	0.0190743
1225	ZBTB1	MSTRG.26910	ENSG00000126804	0.879979	2.22876	1.33971	0.019083
1226	NAB1	MSTRG.6093	ENSG00000138386	0.383844	1.08345	1.49462	0.0191975
1227	BPNT2	MSTRG.16948	ENSG00000104331	6.683	11.4475	0.776373	0.0192442
1228	HSD17B12	MSTRG.21918	ENSG00000149084	9.66748	23.1182	1.25773	0.0192442
1229	PPP1R8	MSTRG.722	ENSG00000117751	9.08365	13.584	0.580516	0.0192859
1230	PRR15	MSTRG.14646	ENSG00000176532	0.028927	1.22692	5.35863	0.0192951
1231	POLI	MSTRG.33352	ENSG00000101751	0.154559	0.876902	2.4966	0.0193894
1232	UMAD1	MSTRG.14438	ENSG00000219545	1.07383	2.79295	1.37821	0.0194084
1233	TRA2A	MSTRG.14563	ENSG00000164548	12.4042	22.9079	0.884968	0.0194428
1234	SEPTIN8	MSTRG.11750	ENSG00000164402	4.81399	7.57851	0.654572	0.0195098
1235	FKBP7	MSTRG.5972	ENSG00000079150	5.73401	9.9117	0.789481	0.019549
1236	ARL8A	MSTRG.3287	ENSG00000143862	20.2866	26.4268	0.381453	0.0195928
1237	FAM185A	MSTRG.15665	ENSG00000222011	0.0377226	0.61472	3.99103	0.0196121
1238	PRRC1	MSTRG.11669	ENSG00000164244	8.35196	15.1603	0.860032	0.0196531
1239	TMEM35A	MSTRG.39685	ENSG00000126950	4.26162	15.0374	1.81883	0.0196531
1240	ZNF208	MSTRG.15018	ENSG00000160321	0.144014	0.808403	2.48067	0.0196662
1241	THAP6	MSTRG.9683	ENSG00000174796	0.0862873	1.00948	3.53312	0.0198091
1242	FZD2	MSTRG.31995	ENSG00000180340	16.077	22.0323	0.454596	0.0198372
1243	TENT2	MSTRG.11312	ENSG00000164329	0.891716	2.97042	1.73488	0.0198599
1244	TMEM254	MSTRG.20581	ENSG00000133678	3.23495	5.60417	0.792567	0.0198599
1245	PLEKHF1	MSTRG.34956	ENSG00000166289	1.2283	3.82744	1.63892	0.0199305
1246	MEIS1	MSTRG.4794	ENSG00000143995	2.54824	4.81918	0.91902	0.0200393
1247	RAB14	MSTRG.19099	ENSG00000119396	12.9252	24.2462	0.907527	0.0201317
1248	TERF2	MSTRG.30286	ENSG00000132604	3.52593	8.36925	1.24686	0.0203162
1249	LRIG3	MSTRG.24623	ENSG00000139263	1.46701	6.55738	2.15947	0.0203236
1250	ERVK11-1	MSTRG.1941	ENSG00000125347	0.225345	1.1453	2.34039	0.0204005
1251	IRF1	MSTRG.11740	ENSG00000092098	4.37684	7.84994	0.842648	0.020403
1252	RNF31	MSTRG.26468	ENSG00000285152	1.9965	5.75187	1.52609	0.0204651
1253	HDAC9	MSTRG.14478	ENSG00000048052	0	0.386697	8.59879	0.0204923
1254	CHST14	MSTRG.27800	ENSG00000169105	17.7646	25.2092	0.504915	0.0205756
1255	C1orf52	MSTRG.1666	ENSG00000162642	1.87365	3.41773	0.866835	0.0207559
1256	SMC5	MSTRG.18441	ENSG00000198887	0	0.99375	9.95819	0.0207641
1257	FRMD6	MSTRG.26713	ENSG00000139926	8.11429	17.4891	1.10783	0.0208074
1258	EXT2	MSTRG.21933	ENSG00000151348	11.2556	17.8924	0.668654	0.0208193
1259	TM4SF1	MSTRG.8413	ENSG00000169908	3.49322	10.6048	1.60181	0.0208762
1260	SELENBP1	MSTRG.2483	ENSG00000143416	8.45592	15.445	0.869027	0.0208774
1261	EMX2	MSTRG.21124	ENSG00000170370	1.39684	3.15066	1.17291	0.020951
1262	PITPNM1	MSTRG.22629	ENSG00000110697	5.6693	9.81793	0.792142	0.020951
1263	VSTM4	MSTRG.20207	ENSG00000165633	0.061941	1.37959	4.45514	0.0209639
1264	PCGF5	MSTRG.20699	ENSG00000180628	0.24724	0.893224	1.8489	0.0209639
1265	SNX33	MSTRG.28552	ENSG00000173548	7.20632	12.0459	0.741125	0.0211815
1266	PLPPR4	MSTRG.1840	ENSG00000117600	0.518735	4.06954	2.96937	0.0212668
1267	HMG20A	MSTRG.28602	ENSG00000140382	0.836948	2.70978	1.69378	0.0212763
1268	OTUD1	MSTRG.19935	ENSG00000165312	0.482037	1.7091	1.82388	0.0213089
1269	KRCC1	MSTRG.5089	ENSG00000172086	5.82526	9.69152	0.734302	0.021373
1270	ZMYM5	MSTRG.25570	ENSG00000132950	0.473262	1.85816	1.9709	0.0213749
1271	SSPN	MSTRG.24007	ENSG00000123096	1.11474	3.7783	1.76011	0.0214582
1272	SLC7A8	MSTRG.26432	ENSG00000092068	1.6575	5.23494	1.65857	0.0215956
1273	APOL3	MSTRG.38491	ENSG00000128284	1.43531	5.43217	1.91943	0.0217308
1274	UBAC2	MSTRG.26119	ENSG00000134882	3.45598	5.46745	0.661619	0.0217455
1275	PCGF1	MSTRG.4949	ENSG00000115289	1.00284	2.76149	1.46045	0.0218488
1276	ADCY3	MSTRG.4204	ENSG00000138031	8.53567	15.2111	0.833474	0.0218716
1277	RAB1A	MSTRG.4774	ENSG00000138069	47.1195	71.1104	0.593727	0.0220263
1278	ETAA1	MSTRG.4803	ENSG00000143971	0.113397	1.40288	3.61729	0.0220906
1279	IGF1R	MSTRG.28950	ENSG00000140443	0.0963574	0.751294	2.94993	0.0222708
1280	TMEM220	MSTRG.31102	ENSG00000187824	0.995097	1.89227	0.926523	0.0222878
1281	SAP30	MSTRG.10463	ENSG00000164105	4.35017	7.77715	0.838024	0.022391
1282	RHEB	MSTRG.16331	ENSG00000106615	21.7679	29.3059	0.428974	0.022391
1283	RANBP17	MSTRG.12276	ENSG00000204764	0.0379753	0.259029	2.73804	0.0223923
1284	TMEM129	MSTRG.9059	ENSG00000168936	10.7043	18.1535	0.762007	0.0224254
1285	MKRN1	MSTRG.16130	ENSG00000133606	10.3005	15.7629	0.613777	0.0226049
1286	SERTAD2	MSTRG.4765	ENSG00000179833	2.27991	7.60944	1.73837	0.0226087
1287	CDKN1C	MSTRG.21461	ENSG00000129757	0.244845	1.20234	2.29122	0.0226202
1288	PLPP7	MSTRG.19418	ENSG00000160539	1.3696	2.89952	1.0815	0.0227665
1289	VAMP3	MSTRG.251	ENSG00000049245	26.218	36.2279	0.466529	0.0227919
1290	GGT5	MSTRG.38224	ENSG00000099998	0.136282	2.82262	4.36232	0.0228081
1291	OSBPL3	MSTRG.14577	ENSG00000070882	1.47975	5.34669	1.85258	0.0228599
1292	SRSF11	MSTRG.1553	ENSG00000116754	1.38234	2.84354	1.04004	0.0228599
1293	STK39	MSTRG.5798	ENSG00000198648	0.269041	0.617127	1.19472	0.0230294
1294	ZSCAN25	MSTRG.15510	ENSG00000197037	0.155958	1.15669	2.88279	0.0230802
1295	KLF11	MSTRG.4049	ENSG00000172059	0.181517	3.30332	4.17825	0.023101
1296	RBP1	MSTRG.8347	ENSG00000114115	0.0185491	0.247956	3.67072	0.0231559
1297	ADAM15	MSTRG.2612	ENSG00000143537	33.0539	46.4921	0.492153	0.023196
1298	PIP4P2	MSTRG.17218	ENSG00000155099	2.69289	5.5123	1.03323	0.0232028
1299	APOBEC3G	MSTRG.38646	ENSG00000239713	0.617687	3.52071	2.50899	0.0232028
1300	C11orf54	MSTRG.23029	ENSG00000182919	0.256044	1.03376	2.00922	0.0232277
1301	RAB3B	MSTRG.1319	ENSG00000169213	5.35107	10.3213	0.947601	0.0232669
1302	GTF2I	MSTRG.15198	ENSG00000263001	7.93019	12.661	0.6749	0.0234486
1303	SLC2A10	MSTRG.37154	ENSG00000197496	2.48442	5.19211	1.06311	0.0234649
1304	TGIF1	MSTRG.33032	ENSG00000177426	2.45935	4.14615	0.753261	0.0236725
1305	KCNAB2	MSTRG.220	ENSG00000069424	0.542746	2.60889	2.26298	0.0236802
1306	TUT7	MSTRG.18560	ENSG00000083223	0.421585	2.21819	2.39272	0.0237231
1307	RNF111	MSTRG.28142	ENSG00000157450	0.051334	0.986883	4.23852	0.0237231
1308	ATXN7L2	MSTRG.1924	ENSG00000162650	0.804503	2.2866	1.50587	0.0237369
1309	RUFY3	MSTRG.9630	ENSG00000018189	0.515363	1.30148	1.3348	0.0237662
1310	TSN	MSTRG.5490	ENSG00000211460	9.97922	17.9102	0.843721	0.0238011
1311	ANXA4	MSTRG.4844	ENSG00000196975	2.01185	3.55349	0.820405	0.0239359
1312	NBN	MSTRG.17206	ENSG00000104320	1.69371	4.34992	1.36028	0.0239473
1313	ZSCAN18	MSTRG.36338	ENSG00000121413	7.17479	9.74436	0.441578	0.0242183
1314	TP53BP1	MSTRG.27913	ENSG00000067369	1.33803	6.17492	2.20547	0.0244361
1315	TMEM237	MSTRG.6211	ENSG00000155755	2.72852	5.11323	0.905866	0.0244361
1316	ALG1	MSTRG.21481	ENSG00000033011	0.726346	1.64205	1.17566	0.0246832
1317	TRAPPC8	MSTRG.33206	ENSG00000153339	0	1.15636	10.1766	0.0246832
1318	VAMP4	MSTRG.2935	ENSG00000117533	2.38468	6.91823	1.53621	0.0249415
1319	YTHDF3	MSTRG.16985	ENSG00000185728	5.49147	11.9178	1.11771	0.0251081
1320	ADAM10	MSTRG.28134	ENSG00000137845	6.28378	13.3998	1.09238	0.0251081
1321	TLK1	MSTRG.5842	ENSG00000198586	1.08654	4.72254	2.1188	0.0252822
1322	NFATC3	MSTRG.30249	ENSG00000072736	0.910015	5.46722	2.58552	0.0252894
1323	ZMAT3	MSTRG.8663	ENSG00000172667	7.04564	11.8004	0.743957	0.025339
1324	SEC23B	MSTRG.36661	ENSG00000101310	11.808	20.51	0.796511	0.025392
1325	ZNF514	MSTRG.5120	ENSG00000144026	0.433033	1.32823	1.61471	0.025392
1326	COLEC12	MSTRG.32992	ENSG00000158270	0.560222	3.76892	2.74789	0.0255218
1327	RUSC2	MSTRG.18194	ENSG00000198853	5.30802	9.85183	0.892093	0.0255281
1328	MAT2A	MSTRG.5040	ENSG00000168906	44.5807	66.5985	0.57906	0.0255281
1329	WDR87	MSTRG.35234	ENSG00000171804	0	0.499377	8.96687	0.0255363
1330	ZNF550	MSTRG.36276	ENSG00000251369	0.055679	0.618268	3.44968	0.0255363
1331	DTX3L	MSTRG.8079	ENSG00000163840	0.534079	8.15418	3.92989	0.025561
1332	CREBL2	MSTRG.23875	ENSG00000111269	4.74499	8.51677	0.843768	0.0256115
1333	FBXO44	MSTRG.335	ENSG00000132879	2.34985	5.0147	1.09327	0.025614
1334	RHOT1	MSTRG.31560	ENSG00000126858	0.142089	1.3525	3.2417	0.0256254
1335	ZFAND2A	MSTRG.14248	ENSG00000178381	1.85136	3.12271	0.753899	0.0256453
1336	ADAP2	MSTRG.31499	ENSG00000184060	1.00617	2.16323	1.10355	0.0257078
1337	BAG4	MSTRG.16790	ENSG00000156735	0.760268	3.24965	2.09425	0.0257163
1338	DLEU1	MSTRG.25922	ENSG00000176124	3.18134	5.6553	0.829772	0.0257163
1339	CASTOR2	MSTRG.2408	AK095583.1	0.273645	1.10536	2.01019	0.0258464
1340	WDR36	MSTRG.11539	ENSG00000134987	0	1.84686	10.8516	0.0261535
1341	AMFR	MSTRG.30047	ENSG00000159461	14.0687	22.9346	0.704997	0.0262145
1342	HTT	MSTRG.9118	ENSG00000197386	0.041754	1.5741	5.20324	0.0262216
1343	PAIP1	MSTRG.31281	ENSG00000172239	2.15362	4.24006	0.97699	0.0263037
1344	HERPUD2	MSTRG.14752	ENSG00000122557	5.06773	9.12209	0.847897	0.0264052
1345	MAP4K3	MSTRG.4463	ENSG00000011566	0.744171	5.66188	2.92589	0.026487
1346	MESD	MSTRG.28676	ENSG00000117899	7.86414	11.1567	0.504493	0.0265988
1347	KAZALD1	MSTRG.20912	ENSG00000107821	0.281212	0.973806	1.78833	0.0266206
1348	CDKN1B	MSTRG.23879	ENSG00000111276	2.93795	5.98993	1.02748	0.0266206
1349	STK38L	MSTRG.24014	ENSG00000211455	0.0190797	1.34025	6.06169	0.0266206
1350	FAM161B	MSTRG.27093	ENSG00000156050	0.30563	2.24788	2.87463	0.0266206
1351	NMNAT1	MSTRG.296	ENSG00000173614	1.42829	2.54166	0.831033	0.0266206
1352	AMZ2	MSTRG.32504	ENSG00000196704	1.03338	2.54431	1.29907	0.0266206
1353	PAXBP1	MSTRG.37642	ENSG00000159086	0.0335036	0.746739	4.43771	0.0266206
1354	EFCAB14	MSTRG.1261	ENSG00000159658	7.59294	14.1862	0.90167	0.0266509
1355	RASSF2	MSTRG.36567	ENSG00000101265	0.764573	21.5965	4.81818	0.0267759
1356	MTSS2	MSTRG.30336	ENSG00000132613	5.6569	16.61	1.5538	0.0268365
1357	F2R	MSTRG.11269	ENSG00000181104	16.8113	35.7185	1.08719	0.0268484
1358	TMEM98	MSTRG.31585	ENSG00000006042	28.7334	38.5913	0.425533	0.0268484
1359	UTY	MSTRG.37753	ENSG00000183878	0.0540001	1.14686	4.38336	0.0268484
1360	TRIM4	MSTRG.15525	ENSG00000146833	2.51125	6.0654	1.27186	0.0268523
1361	UTP14C	MSTRG.25949	ENSG00000253797	1.93618	3.48634	0.84817	0.0269046
1362	TIMP2	MSTRG.32773	ENSG00000035862	291.987	401.351	0.458959	0.0270744
1363	BDH2	MSTRG.9951	ENSG00000164039	4.70426	7.72863	0.716126	0.0270744
1364	METTL14	MSTRG.10076	ENSG00000145388	1.01844	2.52702	1.31023	0.027168
1365	NBPF12	MSTRG.2289	ENSG00000268043	0.0477739	0.321793	2.72643	0.0271912
1366	PRPSAP2	MSTRG.31294	ENSG00000141127	3.14842	6.0339	0.938243	0.0274815
1367	ZC2HC1A	MSTRG.17131	ENSG00000104427	0.0343758	0.574621	4.02428	0.0274828
1368	TMEM185B	MSTRG.5470	ENSG00000226479	6.46609	9.86475	0.609311	0.0274828
1369	RRN3	MSTRG.29606	ENSG00000085721	1.28618	2.42984	0.917241	0.0274927
1370	NPHP3	MSTRG.8251	ENSG00000113971	3.1795	5.54142	0.801262	0.0275544
1371	MASP1	MSTRG.8802	ENSG00000127241	20.4102	34.221	0.745565	0.0276163
1372	CDK13	MSTRG.14796	ENSG00000065883	0.643229	2.31202	1.84414	0.0276839
1373	CRTAP	MSTRG.7102	ENSG00000170275	33.5977	45.0666	0.423685	0.0278464
1374	PLEKHH3	MSTRG.31834	ENSG00000068137	1.80387	3.45234	0.9361	0.0278752
1375	TMEM216	MSTRG.22156	ENSG00000187049	6.09601	9.7559	0.67832	0.0279578
1376	MEPCE	MSTRG.15563	ENSG00000146834	19.7198	25.063	0.345897	0.0280606
1377	ERAP2	MSTRG.11459	ENSG00000164308	4.6127	20.7156	2.16679	0.0282608
1378	NOVA1	MSTRG.26499	ENSG00000139910	0.784507	1.93507	1.30144	0.0282608
1379	NCOA6	MSTRG.36882	ENSG00000198646	0.0231738	1.0241	5.40617	0.028289
1380	TCEA1	MSTRG.16922	ENSG00000187735	4.61524	9.44106	1.03238	0.0284362
1381	PAFAH1B2	MSTRG.23296	ENSG00000168092	7.50633	10.8297	0.528759	0.0285155
1382	GDF6	MSTRG.17272	ENSG00000156466	0.553276	3.58282	2.69282	0.0285405
1383	NUDT21	MSTRG.30048	ENSG00000167005	6.94398	11.5391	0.732614	0.0285405
1384	MSX2	MSTRG.12346	ENSG00000120149	0.948152	2.5431	1.42245	0.0286
1385	RASGRF2	MSTRG.11341	ENSG00000113319	0.398704	2.52454	2.65959	0.028668
1386	ARMC10	MSTRG.7864	ENSG00000170632	2.43563	4.87912	1.00203	0.0288648
1387	TAOK2	MSTRG.29777	ENSG00000149930	5.93073	9.62208	0.698047	0.0288777
1388	TM9SF2	MSTRG.26124	ENSG00000125304	21.4304	44.2593	1.04629	0.0289969
1389	AASDHPPT	MSTRG.23158	ENSG00000149313	5.96486	11.9075	0.99719	0.0290325
1390	LEPROTL1	MSTRG.16696	ENSG00000104660	4.92734	7.37182	0.581115	0.0291647
1391	CEPT1	MSTRG.1977	ENSG00000134255	3.04425	7.19585	1.2408	0.029261
1392	FBXO16	MSTRG.16673	ENSG00000214050	0.171326	1.21479	2.81868	0.0292637
1393	RFK	MSTRG.18483	ENSG00000135002	3.42349	7.0369	1.03926	0.0293219
1394	UBE2D1	MSTRG.20256	ENSG00000072401	1.79057	4.1848	1.22427	0.0293779
1395	COG6	MSTRG.25767	ENSG00000133103	0	1.04048	10.0244	0.0294034
1396	PACC1	MSTRG.3451	ENSG00000065600	0.882142	3.35863	1.92758	0.029425
1397	CCDC82	MSTRG.23076	ENSG00000149231	0.330867	0.947524	1.51508	0.0295057
1398	MRNIP	MSTRG.12469	ENSG00000161010	0.465368	0.921089	0.983438	0.0295754
1399	ELK3	MSTRG.24907	ENSG00000111145	6.6237	13.4155	1.01808	0.0296596
1400	PTGFR	MSTRG.1625	ENSG00000122420	0	0.903792	9.82144	0.0297632
1401	SLC46A1	MSTRG.31401	ENSG00000076351	0.632086	2.06737	1.70802	0.0298498
1402	SAMD14	MSTRG.32217	ENSG00000167100	2.24462	4.63925	1.04709	0.0298767
1403	AGGF1	MSTRG.11278	ENSG00000164252	1.91794	4.36877	1.18725	0.0301073
1404	IFI35	MSTRG.31866	ENSG00000068079	17.6482	41.8215	1.24468	0.0301323
1405	FBXL19	MSTRG.29860	ENSG00000099364	6.27246	8.47229	0.43366	0.0301348
1406	SYNDIG1L	MSTRG.27102	ENSG00000183379	19.3423	23.5217	0.28222	0.0303204
1407	ZBTB25	MSTRG.26904	ENSG00000089775	0.108109	0.519327	2.25365	0.0303733
1408	TMEM106B	MSTRG.14448	ENSG00000106460	0.836219	2.32469	1.47398	0.0304019
1409	AMY2B	MSTRG.1878	ENSG00000240038	0.296581	1.34723	2.17971	0.0304974
1410	FEM1C	MSTRG.11591	ENSG00000145780	3.98086	7.74382	0.95979	0.0305629
1411	SPACA9	MSTRG.19444	ENSG00000165698	1.6114	3.43808	1.09282	0.0305757
1412	F11R	MSTRG.2798	ENSG00000158769	0.867499	1.50916	0.798105	0.0306987
1413	TTC3	MSTRG.39599	ENSG00000182670	0.13813	0.739939	2.41292	0.0306987
1414	MRPL35	MSTRG.5067	ENSG00000132313	2.34939	3.03588	0.369692	0.030738
1415	FAF2	MSTRG.12364	ENSG00000113194	10.3375	15.8979	0.6209	0.0308111
1416	LNPEP	MSTRG.11461	ENSG00000113441	0	1.99401	10.9622	0.0308223
1417	LPCAT3	MSTRG.23754	ENSG00000111684	15.0324	25.4633	0.7603	0.0308599
1418	SDHD	MSTRG.23233	ENSG00000204370	22.6955	38.4018	0.758746	0.0311617
1419	WEE1	MSTRG.21619	ENSG00000166483	3.57203	6.99457	0.969295	0.0312031
1420	DUSP6	MSTRG.24838	ENSG00000139318	22.2458	38.2841	0.783187	0.0312114
1421	REEP3	MSTRG.20316	ENSG00000165476	2.01023	3.65927	0.863872	0.0312363
1422	MIS12	MSTRG.30946	ENSG00000167842	1.1755	2.68385	1.19033	0.0313674
1423	AKAP10	MSTRG.31332	ENSG00000108599	2.43956	5.04284	1.04731	0.0313718
1424	ARAP1	MSTRG.22783	ENSG00000186635	6.26352	10.5374	0.750378	0.0314447
1425	TMCO1	MSTRG.2868	ENSG00000143183	12.794	18.5118	0.532948	0.0314897
1426	PTGES	MSTRG.19379	ENSG00000148344	4.90523	7.55943	0.623853	0.0315253
1427	MYZAP	MSTRG.28116	ENSG00000263155	1.52373	2.80238	0.878618	0.0315253
1428	CYP51A1	MSTRG.15387	ENSG00000001630	34.9691	60.2924	0.785877	0.0316043
1429	MAST4	MSTRG.11136	ENSG00000069020	0.00994549	0.047947	2.16088	0.0316426
1430	MORN4	MSTRG.20821	ENSG00000171160	2.28497	5.12148	1.16404	0.0316426
1431	TGOLN2	MSTRG.5028	ENSG00000152291	13.9132	23.8524	0.77763	0.031707
1432	TMEM64	MSTRG.17213	ENSG00000180694	0.753282	2.23785	1.56958	0.0317329
1433	CALM2	MSTRG.4579	ENSG00000143933	73.4968	111.213	0.597562	0.0317329
1434	SCOC	MSTRG.10260	ENSG00000153130	2.26097	6.29658	1.47721	0.0317401
1435	BOD1	MSTRG.12341	ENSG00000145919	19.3715	24.8609	0.359924	0.0317401
1436	GANC	MSTRG.27884	ENSG00000214013	0.163978	1.68617	3.35425	0.031833
1437	F8	MSTRG.40207	ENSG00000185010	0.0411752	0.435002	3.36987	0.0318495
1438	FBXO3	MSTRG.21855	ENSG00000110429	1.09168	2.3101	1.08071	0.0318913
1439	VDR	MSTRG.24171	ENSG00000111424	1.34859	5.57004	2.04543	0.0318913
1440	BIRC3	MSTRG.23110	ENSG00000023445	0.263339	2.8244	3.418	0.0320167
1441	SLC35E3	MSTRG.24707	ENSG00000175782	1.78369	4.72855	1.40603	0.0320374
1442	TSPYL5	MSTRG.17288	ENSG00000180543	3.57509	6.61858	0.888355	0.0321004
1443	SUZ12	MSTRG.31553	ENSG00000178691	0.25887	2.86471	3.46303	0.0321333
1444	ATP2B1	MSTRG.24852	ENSG00000070961	2.4779	10.7095	2.11125	0.0321346
1445	THADA	MSTRG.4519	ENSG00000115970	0	1.86647	10.8669	0.0323579
1446	CAPN7	MSTRG.6980	ENSG00000131375	0	1.8165	10.8277	0.0324418
1447	FAM210B	MSTRG.37256	ENSG00000124098	24.5231	33.3036	0.441521	0.032637
1448	CTSO	gene-CTSO	ENSG00000256043	1.01476	4.32364	2.09002	0.032663
1449	CLIP4	MSTRG.4331	ENSG00000115295	0.587765	2.41558	2.0372	0.0328132
1450	PPP2R5C	MSTRG.27438	ENSG00000078304	3.92077	6.29685	0.683354	0.0329783
1451	B3GALNT2	gene-B3GALNT2	ENSG00000162885	0.418663	1.40179	1.74099	0.0329783
1452	ZSWIM8	MSTRG.20491	ENSG00000214655	0.165207	1.27687	2.94269	0.0333169
1453	ADAMTS7	MSTRG.28607	ENSG00000136378	0.976857	2.48647	1.34698	0.033321
1454	RUFY1	MSTRG.12457	ENSG00000176783	2.21181	4.0081	0.857398	0.0333366
1455	CDS2	MSTRG.36577	ENSG00000101290	3.82536	7.05894	0.883684	0.0333594
1456	CFAP251	MSTRG.25360	ENSG00000158023	0.34082	1.54956	2.18148	0.0335504
1457	IDUA	MSTRG.9023	ENSG00000127415	1.66909	3.61777	1.11558	0.0336094
1458	PCDH9	MSTRG.25979	ENSG00000184226	0.0235249	0.140827	2.53181	0.0336752
1459	TMEM248	MSTRG.15089	ENSG00000106609	22.1126	29.0175	0.392042	0.0336769
1460	MIA3	MSTRG.3542	ENSG00000154305	1.57571	5.45566	1.7911	0.0336769
1461	TMEM127	MSTRG.5153	ENSG00000135956	11.2138	18.6246	0.731874	0.0336948
1462	GBP1	MSTRG.1710	ENSG00000117228	6.49741	17.8719	1.45961	0.0337389
1463	CASP7	MSTRG.21085	ENSG00000165806	2.48552	5.82163	1.22754	0.0337389
1464	GGPS1	MSTRG.3799	ENSG00000152904	3.47481	5.51663	0.666699	0.0337389
1465	PEAK1	MSTRG.28601	ENSG00000173517	0.497987	2.44213	2.29166	0.0337492
1466	SMC2	MSTRG.18855	ENSG00000136824	0	0.822298	9.68527	0.0338558
1467	EML1	MSTRG.27350	ENSG00000066629	4.57384	11.044	1.27161	0.0338689
1468	RECK	MSTRG.18231	ENSG00000122707	11.3765	23.1721	1.02627	0.0339212
1469	ID2	MSTRG.4024	ENSG00000115738	2.33888	5.58076	1.25428	0.0339212
1470	OLFM2	MSTRG.34246	ENSG00000105088	5.38765	15.5197	1.5262	0.0339742
1471	AKR1E2	MSTRG.19736	ENSG00000165568	0.248245	0.850664	1.77272	0.0340281
1472	AGAP7P	MSTRG.20157	ENSG00000264204	0.131958	0.866723	2.70626	0.0340281
1473	CYSRT1	MSTRG.19635	ENSG00000197191	0.627603	2.0228	1.68685	0.034047
1474	ANTXR2	MSTRG.9757	ENSG00000163297	5.80365	10.2305	0.817741	0.0341662
1475	TMEM135	MSTRG.23004	ENSG00000166575	0.286101	1.61283	2.49086	0.034205
1476	RIPK2	MSTRG.17201	ENSG00000104312	4.72458	7.99311	0.758448	0.0342656
1477	PARP8	MSTRG.2181	ENSG00000151883	0.399948	1.79107	2.16014	0.0343088
1478	MED19	MSTRG.22070	ENSG00000156603	9.78863	12.812	0.388285	0.0343088
1479	STON1	MSTRG.4602	ENSG00000243244	0.393357	1.35833	1.78532	0.0343088
1480	TIMM10B	MSTRG.21540	ENSG00000132286	8.95365	12.5549	0.487652	0.0343578
1481	FICD	MSTRG.25075	ENSG00000198855	0.997351	5.51633	2.46635	0.0344082
1482	PMS2P1	MSTRG.15209	ENSG00000078319	0.0707496	0.854388	3.57554	0.0344935
1483	MINDY3	MSTRG.19874	ENSG00000148481	1.70582	3.38326	0.987531	0.0344941
1484	ZNF91	MSTRG.34925	ENSG00000167232	0.0116468	0.164286	3.70812	0.0345449
1485	UBQLN1	MSTRG.18526	ENSG00000135018	13.4086	22.3233	0.735351	0.0345765
1486	ERVK-5	MSTRG.14320	HGNC:13757	0.230957	1.50496	2.69875	0.0347121
1487	GSKIP	MSTRG.27324	ENSG00000100744	3.46816	6.72944	0.956116	0.0347578
1488	PPM1B	MSTRG.4531	ENSG00000138032	0.789678	1.69577	1.10163	0.0348978
1489	GCLM	MSTRG.1788	ENSG00000023909	2.82556	5.42261	0.940209	0.0351126
1490	DLAT	MSTRG.23229	ENSG00000150768	4.03661	7.31017	0.856601	0.0351604
1491	DLC1	MSTRG.16483	ENSG00000164741	1.50453	2.6531	0.817951	0.0351613
1492	DPY19L4	MSTRG.17254	ENSG00000156162	0.249095	2.44052	3.28723	0.0351613
1493	BBS4	MSTRG.28474	ENSG00000140463	1.96466	8.33739	2.08475	0.0351613
1494	UNC50	MSTRG.5195	ENSG00000115446	15.2116	24.8415	0.707544	0.0351613
1495	APH1A	MSTRG.2387	ENSG00000117362	48.098	60.4638	0.330088	0.0353053
1496	RDH11	MSTRG.26958	ENSG00000072042	28.9596	37.9498	0.390041	0.0353053
1497	MEX3B	MSTRG.28694	ENSG00000183496	0.323693	1.65526	2.35078	0.0353431
1498	IL1R1	MSTRG.5271	ENSG00000115594	2.01055	9.56362	2.2494	0.0354011
1499	ZNF415	MSTRG.36075	ENSG00000170954	1.1198	2.42426	1.11361	0.0354295
1500	ZDHHC13	MSTRG.21754	ENSG00000177054	0.41113	3.18345	2.94988	0.0354782
1501	PTPN9	MSTRG.28549	ENSG00000169410	4.32814	7.70294	0.831517	0.0355759
1502	TMEM94	MSTRG.32653	ENSG00000177728	0.906219	3.54916	1.96836	0.0355865
1503	EML2	MSTRG.35656	ENSG00000125746	7.95576	12.3552	0.634986	0.0355996
1504	KLF9	MSTRG.18442	ENSG00000119138	0.941426	2.28505	1.27841	0.0357868
1505	RHBDL1	MSTRG.29091	ENSG00000103269	0.49209	1.78067	1.85331	0.0357924
1506	ADAM23	MSTRG.6259	ENSG00000114948	1.04457	3.88539	1.89414	0.0357924
1507	TIA1	MSTRG.4867	ENSG00000116001	1.3916	2.78487	1.00035	0.0360458
1508	PDE4B	MSTRG.1513	ENSG00000184588	0	1.15439	10.1742	0.0361732
1509	CFAP300	MSTRG.23101	ENSG00000137691	0.753995	2.25492	1.57917	0.0361732
1510	NR2C1	MSTRG.24889	ENSG00000120798	1.21291	2.19297	0.853877	0.0361732
1511	PPP1CC	MSTRG.25146	ENSG00000186298	15.5598	23.4946	0.594474	0.0361732
1512	APH1B	MSTRG.28219	ENSG00000138613	3.87495	6.82104	0.815655	0.0361732
1513	HSPA4L	MSTRG.10179	ENSG00000164070	0.0179311	0.566982	4.90701	0.0363523
1514	PMS1	MSTRG.6081	ENSG00000064933	0.272594	1.3357	2.28857	0.0364126
1515	RCAN3	MSTRG.596	ENSG00000117602	0.183848	2.03337	3.46017	0.0365579
1516	GPR89B	MSTRG.2245	ENSG00000188092	4.15603	7.63177	0.876653	0.0368183
1517	MMP16	MSTRG.17186	ENSG00000156103	0.0911665	0.734723	2.99685	0.0368849
1518	CTSA	MSTRG.37127	ENSG00000064601	84.63	122.723	0.536158	0.0369487
1519	SLF2	MSTRG.20894	ENSG00000119906	0.0868161	1.67104	4.25098	0.0369676
1520	PDK2	MSTRG.32215	ENSG00000005882	5.57636	7.90554	0.503466	0.0369676
1521	ESF1	MSTRG.36628	ENSG00000089048	0	1.22385	10.2584	0.0369876
1522	ZNF397	MSTRG.33219	ENSG00000186812	0.135439	1.47273	3.43314	0.0373596
1523	RRAGC	MSTRG.984	ENSG00000116954	15.035	27.2488	0.857827	0.0373596
1524	HOXA13	MSTRG.14621	ENSG00000106031	1.19296	2.78776	1.22388	0.0374161
1525	SETD7	MSTRG.10253	ENSG00000145391	2.24374	7.24138	1.68992	0.0374594
1526	DNAJB6	MSTRG.16394	ENSG00000105993	7.25097	9.19376	0.342439	0.0374744
1527	VPS37D	MSTRG.15144	ENSG00000176428	0.339771	1.31704	1.95152	0.0374856
1528	ABCD4	MSTRG.27100	ENSG00000119688	1.44726	3.00934	1.0556	0.0374856
1529	CCDC188	MSTRG.38082	ENSG00000234409	0.00666236	0.548357	6.16381	0.0375244
1530	PMP22	MSTRG.31150	ENSG00000109099	11.3097	17.5681	0.635354	0.0376668
1531	POLR2K	MSTRG.17341	ENSG00000147669	21.8209	27.8947	0.354263	0.0377031
1532	SLC9A9	MSTRG.8387	ENSG00000181804	0	0.647196	9.34029	0.037883
1533	TSPAN10	MSTRG.32859	ENSG00000182612	0.903065	3.25921	1.85046	0.0381111
1534	RNASEH1	MSTRG.4004	ENSG00000171865	4.10019	6.52469	0.670088	0.0381111
1535	C2orf69	MSTRG.6159	ENSG00000178074	0.829343	2.70179	1.70267	0.0386583
1536	TMEM167A	MSTRG.11370	ENSG00000174695	6.98222	11.8372	0.761479	0.0387253
1537	LPAR6	MSTRG.25886	ENSG00000139679	0.959932	2.15186	1.16375	0.0387253
1538	ZNF521	MSTRG.33189	ENSG00000198795	0.0272442	1.10749	5.2945	0.0387322
1539	ISOC1	MSTRG.11686	ENSG00000066583	5.0918	9.56766	0.909858	0.0388581
1540	TBC1D20	MSTRG.36434	ENSG00000125875	9.97193	15.9787	0.68015	0.0388581
1541	CDKN2C	MSTRG.1297	ENSG00000123080	3.50499	5.54539	0.661728	0.0388777
1542	MTURN	MSTRG.14661	ENSG00000180354	1.68721	3.01113	0.835293	0.0388777
1543	PDP1	MSTRG.17244	ENSG00000164951	1.4025	3.87756	1.46649	0.038904
1544	FAM53B	MSTRG.21212	ENSG00000189319	1.27193	3.1824	1.32242	0.03891
1545	ACTR3B	MSTRG.16350	ENSG00000133627	0.255894	3.34737	3.70422	0.0391414
1546	NCKAP5	MSTRG.5590	ENSG00000176771	0.0157252	1.12058	6.06736	0.0391414
1547	TSNAX	MSTRG.3754	ENSG00000116918	3.22733	6.13681	0.926939	0.0391752
1548	APOL6	MSTRG.38486	ENSG00000221963	0.486917	5.18828	3.41083	0.0393886
1549	ARMC1	MSTRG.16996	ENSG00000104442	3.03941	6.35745	1.06441	0.0393985
1550	TEK	MSTRG.18059	ENSG00000120156	0	2.10989	11.0436	0.0394453
1551	SEPTIN11	MSTRG.9718	ENSG00000138758	18.5013	26.8586	0.537735	0.0394453
1552	PCM1	MSTRG.16523	ENSG00000078674	0.253584	2.86801	3.49434	0.0395035
1553	VCPKMT	MSTRG.26674	ENSG00000100483	0.159135	0.481637	1.59165	0.0395574
1554	TK2	MSTRG.30128	ENSG00000166548	4.28076	6.41124	0.582623	0.0397241
1555	POGLUT1	MSTRG.8038	ENSG00000163389	3.24123	5.34153	0.720537	0.0398194
1556	AKR1C1	MSTRG.19742	ENSG00000187134	0.432918	1.46861	1.75994	0.0398711
1557	IPO5	MSTRG.26095	ENSG00000065150	9.48153	20.2283	1.0931	0.0398711
1558	EAPP	MSTRG.26532	ENSG00000129518	9.5125	14.0565	0.563289	0.0398711
1559	ENDOV	MSTRG.32812	ENSG00000173818	0.791615	2.04156	1.36569	0.0398711
1560	RHOD	MSTRG.22586	ENSG00000173156	23.1751	31.4856	0.442101	0.0399366
1561	S100PBP	MSTRG.856	ENSG00000116497	0.845993	2.72779	1.68784	0.0399519
1562	PIP5K1A	MSTRG.2472	ENSG00000143398	5.94164	9.86175	0.730888	0.0399803
1563	CIBAR1	MSTRG.17237	ENSG00000188343	0.985952	3.04298	1.62491	0.0399895
1564	ARRDC2	MSTRG.34705	ENSG00000105643	1.05572	4.33567	2.037	0.0400557
1565	TIGD1	MSTRG.16860	ENSG00000221944	8.29903	13.5274	0.704799	0.0400805
1566	GALM	MSTRG.4451	ENSG00000143891	0.528469	1.5421	1.54321	0.0402485
1567	CDIP1	MSTRG.29367	ENSG00000089486	9.66539	14.3622	0.571324	0.0403586
1568	GSTM4	MSTRG.1936	ENSG00000168765	9.61541	13.9373	0.535481	0.0403885
1569	RXRA	MSTRG.19474	ENSG00000186350	5.19411	13.2431	1.35013	0.0403885
1570	FLRT2	MSTRG.27231	ENSG00000185070	0.312462	0.8268	1.40099	0.0404802
1571	AADAT	MSTRG.10451	ENSG00000109576	0.546681	2.20779	2.01185	0.0404945
1572	PBX1	MSTRG.2864	ENSG00000185630	1.08602	4.25993	1.97079	0.0405381
1573	ARL1	MSTRG.24958	ENSG00000120805	16.321	22.0238	0.432312	0.0405915
1574	ITGB3BP	MSTRG.1482	ENSG00000142856	0.713733	1.48933	1.06016	0.0406404
1575	PGAP2	MSTRG.21497	ENSG00000148985	1.02862	2.78902	1.43816	0.0406404
1576	ZNF329	MSTRG.36342	ENSG00000181894	0.452424	2.7309	2.59097	0.0406404
1577	TRIM52	MSTRG.12514	ENSG00000183718	0.437183	1.35551	1.6303	0.0406414
1578	C11orf71	MSTRG.23273	ENSG00000180425	0.359672	1.19349	1.72764	0.0406797
1579	ADSS1	MSTRG.27539	ENSG00000185100	0.172362	1.22044	2.81673	0.040971
1580	ARL2BP	MSTRG.30075	ENSG00000102931	38.0836	52.2149	0.45528	0.0410065
1581	ZNF888	MSTRG.36058	ENSG00000213793	0.246146	0.750846	1.60507	0.0411226
1582	ASB8	MSTRG.24181	ENSG00000177981	2.77487	5.11805	0.882936	0.0411559
1583	IST1	MSTRG.30375	ENSG00000182149	15.1284	22.6526	0.582385	0.0411737
1584	CLINT1	MSTRG.12220	ENSG00000113282	5.50559	10.445	0.923719	0.041192
1585	GALNS	MSTRG.30675	ENSG00000141012	3.91235	6.79308	0.795876	0.0413108
1586	NFIX	MSTRG.34492	ENSG00000008441	10.6184	18.868	0.829321	0.0413791
1587	NVL	MSTRG.3575	ENSG00000143748	1.12244	2.7451	1.28946	0.041575
1588	CHST11	MSTRG.25010	ENSG00000171310	0.220979	1.33329	2.58757	0.0416891
1589	DIMT1	MSTRG.11065	ENSG00000086189	4.50665	7.40298	0.715926	0.0418799
1590	LRCH2	MSTRG.39855	ENSG00000130224	0	1.54741	10.5966	0.0418799
1591	FAM167B	MSTRG.832	ENSG00000183615	0.256206	0.818874	1.67248	0.0418799
1592	PLD3	MSTRG.35325	ENSG00000105223	106.684	153.113	0.521246	0.0418891
1593	TENT5A	MSTRG.13495	ENSG00000112773	1.11628	5.49445	2.29825	0.0419264
1594	KLF12	MSTRG.25990	ENSG00000118922	0.28702	1.22386	2.08838	0.0421696
1595	BNIP2	MSTRG.28154	ENSG00000140299	3.1042	5.79666	0.900786	0.0422162
1596	POGLUT2	MSTRG.26155	ENSG00000134901	5.688	10.0479	0.820795	0.0422244
1597	CGRRF1	MSTRG.26771	ENSG00000100532	2.37933	4.62339	0.958102	0.0422313
1598	MRPL34	MSTRG.34658	ENSG00000130312	17.9463	24.3506	0.440245	0.0422823
1599	TDRKH	MSTRG.2493	ENSG00000182134	0.0469619	0.854509	4.15682	0.0423253
1600	POFUT1	MSTRG.36811	ENSG00000101346	14.0261	20.784	0.567328	0.0423253
1601	ERLEC1	MSTRG.4613	ENSG00000068912	22.0447	38.2063	0.793348	0.0423253
1602	MAP4K5	MSTRG.26691	ENSG00000012983	0.838751	4.95617	2.56148	0.0423829
1603	ARRDC3	MSTRG.11408	ENSG00000113369	1.10094	4.87229	2.14485	0.0423911
1604	PON2	MSTRG.15445	ENSG00000105854	24.4654	34.934	0.513873	0.0423911
1605	VPS37A	MSTRG.16516	ENSG00000155975	1.25246	2.2865	0.867856	0.0424372
1606	LYSMD2	MSTRG.28052	ENSG00000140280	0.744741	1.92599	1.3696	0.042543
1607	RGS3	MSTRG.19025	ENSG00000138835	3.36304	4.3153	0.3596	0.0425577
1608	TERF1	MSTRG.17084	ENSG00000147601	2.08688	4.039	0.952314	0.042566
1609	CHUK	MSTRG.20874	ENSG00000213341	0.569944	2.07692	1.86372	0.0425671
1610	PALM	MSTRG.33646	ENSG00000099864	0	5.30828	12.3743	0.0426922
1611	SEPTIN10	MSTRG.5313	ENSG00000186522	4.35788	8.51729	0.966604	0.0426922
1612	PLEKHB2	MSTRG.5566	ENSG00000115762	17.9318	34.7844	0.955886	0.0427699
1613	TMEM179B	MSTRG.22241	ENSG00000185475	38.1029	62.6528	0.717462	0.0428605
1614	SMG8	MSTRG.32348	ENSG00000167447	4.27859	6.94357	0.698413	0.0428605
1615	TNC	MSTRG.19063	ENSG00000041982	4.35501	7.73706	0.828964	0.0429057
1616	MINPP1	MSTRG.20644	ENSG00000107789	3.35465	7.75835	1.20934	0.0429057
1617	ZNF562	MSTRG.34225	ENSG00000171466	0.185193	0.987325	2.40819	0.0429057
1618	GTF2IRD2B	MSTRG.15226	ENSG00000174428	0.757762	2.06929	1.44811	0.0429213
1619	PSIP1	MSTRG.17952	ENSG00000164985	2.20092	4.61734	1.06861	0.0429213
1620	GDE1	MSTRG.29561	ENSG00000006007	30.7261	38.4282	0.322691	0.0429213
1621	CAV1	MSTRG.15837	ENSG00000105974	353.766	535.614	0.598399	0.0429433
1622	CASP4	MSTRG.23143	ENSG00000196954	8.132	11.6359	0.516849	0.0431968
1623	GMPR	MSTRG.12714	ENSG00000137198	0.643305	5.09579	2.98377	0.0432936
1624	EBLN1	MSTRG.18253	ENSG00000223601	1.80262	4.43687	1.29897	0.0432936
1625	AKTIP	MSTRG.30017	ENSG00000166971	1.41778	3.09923	1.12773	0.0432936
1626	SMYD4	MSTRG.30803	ENSG00000186532	0.232752	1.85306	2.98764	0.0432936
1627	ENOPH1	MSTRG.9779	ENSG00000145293	6.09212	9.71884	0.673751	0.0435262
1628	CFAP68	MSTRG.23223	ENSG00000137720	1.80252	3.45202	0.937044	0.0436877
1629	STC1	MSTRG.16623	ENSG00000159167	4.9692	12.6513	1.34802	0.0437635
1630	GPR180	MSTRG.26074	ENSG00000152749	0.489421	1.80207	1.87837	0.0437635
1631	PSMD11	MSTRG.31577	ENSG00000108671	11.7746	16.8337	0.51564	0.0437663
1632	CPNE8	MSTRG.24104	ENSG00000139117	0	0.702891	9.45921	0.0440217
1633	TNFSF13	MSTRG.30988	ENSG00000161955	7.1414	9.79924	0.456409	0.0440217
1634	ABCC4	MSTRG.26079	ENSG00000125257	0.744798	3.7655	2.33637	0.0440614
1635	EREG	MSTRG.9677	ENSG00000124882	0.185539	2.51159	3.75163	0.0440614
1636	LANCL1	MSTRG.6303	ENSG00000115365	3.59722	6.89515	0.938508	0.0441162
1637	HAUS3	MSTRG.9078	ENSG00000214367	0.249568	0.881268	1.81601	0.0441162
1638	SAP30L	MSTRG.12181	ENSG00000164576	2.08619	4.16985	0.99878	0.0442228
1639	SLC4A11	MSTRG.36516	ENSG00000088836	1.67258	3.92218	1.22908	0.0442228
1640	LTBP1	MSTRG.4383	ENSG00000049323	3.73787	14.7735	1.98243	0.0442228
1641	MCEE	MSTRG.4882	ENSG00000124370	1.51776	2.83478	0.900849	0.0442228
1642	SEMA3A	MSTRG.15340	ENSG00000075213	7.2372	13.6617	0.916535	0.0442719
1643	MAFIP	MSTRG.37507	ENSG00000274847	0.177286	1.23794	2.79683	0.0442719
1644	IER2	MSTRG.34503	ENSG00000160888	0	16.1914	13.983	0.0442882
1645	SP3	MSTRG.5863	ENSG00000172845	0.796602	2.58876	1.69908	0.0442882
1646	SNX2	MSTRG.11639	ENSG00000205302	2.98962	5.32755	0.833297	0.0443236
1647	RSPH10B2	MSTRG.14423	ENSG00000169402	0.0630627	0.529661	3.05023	0.044464
1648	SLC35A3	MSTRG.1848	ENSG00000117620	0.234059	0.799962	1.76871	0.044464
1649	NBR1	MSTRG.31877	ENSG00000188554	11.0575	19.161	0.793089	0.044464
1650	CCDC149	MSTRG.9361	ENSG00000181982	0.834769	2.34845	1.49115	0.0444743
1651	FBXO6	MSTRG.336	ENSG00000116663	2.88876	5.96304	1.04534	0.0447924
1652	SMAD4	MSTRG.33335	ENSG00000141646	1.64982	4.15178	1.3309	0.044927
1653	FERMT1	MSTRG.36598	ENSG00000101311	0	1.62196	10.6644	0.044927
1654	OXR1	MSTRG.17436	ENSG00000164830	0.998347	3.0131	1.59267	0.0449354
1655	TRAF5	MSTRG.3438	ENSG00000082512	0	0.80596	9.65635	0.0449888
1656	RELL1	MSTRG.9392	ENSG00000181826	0.369345	1.91351	2.37003	0.0449888
1657	WHRN	MSTRG.19048	ENSG00000095397	0.0568759	0.669194	3.53355	0.0453232
1658	CHST15	MSTRG.21205	ENSG00000182022	0.414958	1.31698	1.66382	0.0453335
1659	NUDCD1	MSTRG.17450	ENSG00000120526	2.93473	6.31735	1.10583	0.0453739
1660	NR2F1	MSTRG.11417	ENSG00000175745	4.27534	6.84767	0.679447	0.0454929
1661	TM2D2	MSTRG.16809	ENSG00000169490	13.2642	16.9784	0.356133	0.0456136
1662	PPP4R3A	MSTRG.27266	ENSG00000100796	1.88104	7.44911	1.98497	0.0456136
1663	PTPN21	MSTRG.27236	ENSG00000070778	0	1.75862	10.781	0.0457353
1664	YWHAQ	MSTRG.4039	ENSG00000134308	96.3372	146.549	0.605212	0.0457509
1665	RIT1	MSTRG.2662	ENSG00000143622	4.41593	7.18443	0.702032	0.0459686
1666	TRIM60	MSTRG.10417	ENSG00000176979	0.358776	1.22714	1.77131	0.0460045
1667	COQ10B	MSTRG.6144	ENSG00000115520	4.93899	8.29897	0.748598	0.0460525
1668	MXRA8	MSTRG.93	ENSG00000162576	72.1304	94.0689	0.383104	0.0461722
1669	CAMTA2	MSTRG.30904	ENSG00000108509	11.0366	16.5335	0.583051	0.0462158
1670	EEIG1	MSTRG.19267	ENSG00000167106	4.18508	9.90823	1.24317	0.0466455
1671	QPRT	MSTRG.29754	ENSG00000103485	40.8997	52.2179	0.352448	0.0468768
1672	VRK2	MSTRG.4676	ENSG00000028116	1.06681	2.80829	1.39555	0.0468847
1673	PSMC6	MSTRG.26741	ENSG00000100519	7.83925	10.9933	0.487782	0.0469893
1674	TMEM198	MSTRG.6458	ENSG00000188760	1.28103	2.63358	1.03914	0.0470238
1675	DEAF1	MSTRG.21372	ENSG00000177030	1.97028	2.92981	0.572172	0.0471657
1676	USP38	MSTRG.10289	ENSG00000170185	0.307229	1.6908	2.45648	0.0471794
1677	PPM1A	MSTRG.26853	ENSG00000100614	0.502935	1.08937	1.11351	0.0472283
1678	ZNF404	MSTRG.35528	ENSG00000176222	0.20353	0.996148	2.2855	0.047301
1679	TWF1	MSTRG.24126	ENSG00000151239	6.75109	13.9525	1.04722	0.0473146
1680	POLR3GL	MSTRG.2265	ENSG00000121851	15.2011	18.5922	0.290499	0.0474629
1681	EPHX4	MSTRG.1748	ENSG00000172031	0.860427	3.65299	2.08467	0.0476253
1682	AP3M1	MSTRG.20501	ENSG00000185009	4.69056	8.52809	0.862324	0.0478014
1683	GLYCAM1	MSTRG.2630	ENSG00000257780	3.90544	6.5232	0.739948	0.0478327
1684	PLAA	MSTRG.18054	ENSG00000137055	3.21462	5.31769	0.725977	0.0479122
1685	MTMR6	MSTRG.25645	ENSG00000139505	1.64193	3.93838	1.2617	0.0480424
1686	PBK	MSTRG.16666	ENSG00000168078	4.32495	7.9573	0.879442	0.0480823
1687	TDRD7	MSTRG.18769	ENSG00000196116	0.76487	5.51131	2.84748	0.0481756
1688	MPV17L	MSTRG.29512	ENSG00000156968	2.21556	3.76145	0.763347	0.0482388
1689	COX11	MSTRG.32284	ENSG00000166260	0.736679	1.37779	0.902336	0.0484977
1690	KTI12	MSTRG.1320	ENSG00000198841	12.4335	17.2718	0.474152	0.0486187
1691	CEP295	MSTRG.23022	ENSG00000166004	0.030474	0.197454	2.65657	0.0486187
1692	LINC01356	MSTRG.2036	ENSG00000215866	1.19103	2.90922	1.2877	0.0486302
1693	RAP1B	MSTRG.24705	ENSG00000127314	3.53193	6.18653	0.808501	0.0486302
1694	FAM171A2	MSTRG.31989	ENSG00000161682	0.808379	2.59317	1.68038	0.0486302
1695	COIL	MSTRG.32302	ENSG00000121058	1.00628	2.91233	1.5322	0.0486302
1696	PIGV	MSTRG.663	ENSG00000060642	0.756111	2.06828	1.45055	0.0486302
1697	SPIRE1	MSTRG.33117	ENSG00000134278	0.8331	3.53342	2.08318	0.0486699
1698	N4BP1	MSTRG.29960	ENSG00000102921	2.95224	6.44727	1.12661	0.0489132
1699	ZNF229	MSTRG.35564	ENSG00000278318	0	1.06274	10.0549	0.0489189
1700	CLCA2	MSTRG.1693	ENSG00000137975	0	1.50592	10.5574	0.0489327
1701	SDCBP	MSTRG.16953	ENSG00000137575	21.0671	42.6732	1.0183	0.0489618
1702	LAPTM4B	MSTRG.17291	ENSG00000104341	12.1675	19.729	0.697232	0.0490617
1703	RALGDS	MSTRG.19455	ENSG00000160271	1.69828	3.52489	1.05307	0.0490617
1704	KANSL2	MSTRG.24189	ENSG00000139620	3.76878	7.81079	1.05117	0.0490706
1705	FANCI	MSTRG.28807	ENSG00000140525	0	1.12984	10.1432	0.0490706
1706	PNMA8B	MSTRG.35709	ENSG00000204851	0.300135	1.12219	1.89912	0.0490706
1707	SLC6A16	MSTRG.35883	ENSG00000063127	0.0750594	0.207277	1.4533	0.0490706
1708	PPP6C	MSTRG.19166	ENSG00000119414	5.86116	9.02474	0.622612	0.0491854
1709	DDX5	MSTRG.32481	ENSG00000108654	73.6358	99.7598	0.438045	0.0492334
1710	SLC25A30	MSTRG.25857	ENSG00000174032	0.663987	4.53485	2.76997	0.0492393
1711	KRR1	MSTRG.24756	ENSG00000111615	1.44794	3.06205	1.07997	0.0492532
1712	GNA13	MSTRG.32505	ENSG00000120063	1.99196	6.67889	1.74491	0.0492532
1713	-	MSTRG.17666	UniProt: O00370	0.740085	2.8026	1.91957	0.0493843
1714	RMDN2	MSTRG.4434	ENSG00000115841	0.14957	0.906053	2.59075	0.0494354
1715	CLXN	MSTRG.16893	ENSG00000034239	0.0673384	0.577963	3.0827	0.0494558
1716	ZNF410	MSTRG.27092	ENSG00000119725	5.71809	8.38544	0.552273	0.0494559
1717	BAG5	MSTRG.27511	ENSG00000166170	2.63646	6.83322	1.37363	0.0495179
1718	TM2D3	MSTRG.29004	ENSG00000184277	10.2234	15.6925	0.61815	0.0495604
1719	ARMH4	MSTRG.26810	ENSG00000139971	0.222643	0.899411	2.00938	0.0496442
1720	IMPA2	MSTRG.33105	ENSG00000141401	9.80598	13.8165	0.494617	0.0497025
1721	RCBTB1	MSTRG.25898	ENSG00000136144	0.750532	4.6908	2.64224	0.0498566
1722	CERT1	MSTRG.11248	ENSG00000113163	0.169614	1.38307	3.02011	0.0499321
1723	SMAD5	MSTRG.11831	ENSG00000113658	1.39394	4.29277	1.62204	0.0499321
1724	SEC61A2	MSTRG.19808	ENSG00000065665	0.327086	3.1383	3.2583	0.0499321
1725	SGMS2	MSTRG.9972	ENSG00000164023	0.877925	4.01197	2.19086	0.0499321
1726	FSBP	MSTRG.17250	ENSG00000265817	0.0351959	0.172358	2.25986	0.049979

## Sheet: YvsO(O↓)
	Supplementary Table S3F.
	Differentially expressed genes (DEGs) in normal human dermal fibroblasts (NHDFs) (padj < 0.05).
	Gene name	MSTRG ID	Ensembl ID	avg. RPKM		log2FC	padj
				young	old
1	RAB32	MSTRG.13969	ENSG00000118508	71.1999	21.6646	-1.71649	2.724e-29
2	HMGA1	MSTRG.12977	ENSG00000137309	279.045	84.2047	-1.72852	1.08348e-23
3	RPS2	MSTRG.25269	ENSG00000140988	1085.12	707.666	-0.616713	2.98189e-22
4	KRT19	MSTRG.31767	ENSG00000171345	47.6999	7.12408	-2.74304	6.69733e-21
5	ITGA5	MSTRG.24447	ENSG00000161638	118.754	56.8435	-1.06289	4.63083e-20
6	RPS12	MSTRG.13846	ENSG00000112306	1218.43	409.19	-1.57418	4.80908e-20
7	KRT17	MSTRG.31771	ENSG00000128422	48.5729	9.90794	-2.29338	9.8341e-17
8	TUBB	gene-TUBB	ENSG00000196230	74.0049	34.1994	-1.11363	7.14851e-16
9	EIF5A	gene-EIF5A	ENSG00000132507	66.3041	36.1332	-0.875757	8.0285e-15
10	TRB	MSTRG.40892	HGNC:12155	4.78169	0.00218181	-10.5538	1.73458e-14
11	NRGN	MSTRG.23439	ENSG00000154146	10.6083	0	-13.373	4.15192e-14
12	NES	MSTRG.2706	ENSG00000132688	124.272	32.1782	-1.94932	3.25292e-13
13	PSMB1	MSTRG.14223	ENSG00000008018	162.002	67.875	-1.25504	3.90876e-13
14	GAL	MSTRG.22667	ENSG00000069482	11.9741	0.357269	-5.06285	7.30232e-13
15	RPS2	MSTRG.31314	ENSG00000140988	457.616	294.994	-0.633452	9.17081e-13
16	RPS18	gene-RPS18	ENSG00000231500	236.174	94.8136	-1.31667	9.17081e-13
17	SEMA7A	gene-SEMA7A	ENSG00000138623	12.1202	2.02256	-2.58256	1.01686e-12
18	RPS3A	MSTRG.15455	ENSG00000145425	63.0404	0	-15.944	1.18758e-12
19	SNRPC	MSTRG.12991	ENSG00000124562	105.476	50.7534	-1.05532	1.45968e-12
20	CLIC1	gene-CLIC1	ENSG00000213719	40.84	19.8143	-1.04341	3.96739e-12
21	RACK1	MSTRG.12493	ENSG00000204628	1082.69	631.211	-0.778421	4.15382e-12
22	CSRP1	MSTRG.3252	ENSG00000159176	334.471	124.31	-1.42793	5.72979e-12
23	GTF3C6	MSTRG.13680	ENSG00000155115	51.5767	22.6152	-1.18939	8.80836e-12
24	MTCH1	MSTRG.13050	ENSG00000137409	77.548	45.5746	-0.766847	2.46967e-11
25	NUDT3	MSTRG.12984	ENSG00000272325	41.509	14.6353	-1.50391	3.05009e-11
26	PPP1CA	MSTRG.22607	ENSG00000172531	125.087	72.1713	-0.793427	3.14143e-11
27	ACAT2	MSTRG.14130	ENSG00000120437	83.5588	31.0793	-1.42681	4.70259e-11
28	COL6A1	MSTRG.37894	ENSG00000142156	10.6413	0	-13.3775	4.89826e-11
29	UQCRC1	MSTRG.7407	ENSG00000010256	109.558	42.6645	-1.36057	8.8879e-11
30	EEF1A1	MSTRG.13418	ENSG00000156508	1752.7	920.958	-0.928373	2.9547e-10
31	RPS7	MSTRG.4010	ENSG00000171863	445.306	198.702	-1.16419	7.58481e-10
32	S100A6	MSTRG.2523	ENSG00000197956	4051.51	1815.45	-1.15813	8.02814e-10
33	RRP36	MSTRG.13153	ENSG00000124541	46.6324	23.7103	-0.975791	1.20684e-09
34	CAPZB	MSTRG.462	ENSG00000077549	89.3953	58.9986	-0.59951	1.49959e-09
35	VASP	MSTRG.35646	ENSG00000125753	59.6136	29.4994	-1.01493	3.34241e-09
36	COTL1	MSTRG.30520	ENSG00000103187	303.174	138.863	-1.12648	5.52555e-09
37	RPLP0	MSTRG.25289	ENSG00000089157	1411.32	972.549	-0.537204	6.18172e-09
38	TMEM14B	MSTRG.12667	ENSG00000137210	30.469	15.3526	-0.988818	6.70278e-09
39	CALR	MSTRG.34485	ENSG00000179218	748.036	460.277	-0.700604	7.64586e-09
40	HSP90AB1	MSTRG.13221	ENSG00000096384	293.296	172.518	-0.765607	1.17473e-08
41	EIF4A1	MSTRG.30993	ENSG00000161960	438.533	317.713	-0.464958	1.56634e-08
42	PFN1	MSTRG.30901	ENSG00000108518	574.74	345.984	-0.732203	1.60535e-08
43	SF3B5	MSTRG.13947	ENSG00000169976	111.452	40.3453	-1.46593	1.9315e-08
44	RPL19	MSTRG.31686	ENSG00000108298	590.82	325.214	-0.861328	2.41668e-08
45	CALM2	MSTRG.35711	ENSG00000143933	190.493	134.093	-0.506507	2.75312e-08
46	RPL10A	MSTRG.13010	ENSG00000198755	570.751	276.334	-1.04645	3.8992e-08
47	RPS6	MSTRG.18009	ENSG00000137154	804.293	462.571	-0.798044	6.97014e-08
48	TUBB2A	MSTRG.12580	ENSG00000137267	48.6556	20.4572	-1.24996	1.47391e-07
49	TUBB2B		ENSG00000137285
50	ENO1	MSTRG.267	ENSG00000074800	347.819	250.978	-0.470774	1.57938e-07
51	TCP1	MSTRG.14131	ENSG00000120438	48.6557	24.7224	-0.976763	1.90667e-07
52	MRPL14	MSTRG.13216	ENSG00000180992	24.6231	10.1783	-1.27444	2.44148e-07
53	ILK	MSTRG.21558	ENSG00000166333	120.38	75.2431	-0.67796	2.64096e-07
54	GCAT	MSTRG.38578	ENSG00000100116	8.56443	1.82419	-2.23048	2.80568e-07
55	OR7E24	MSTRG.15459	ENSG00000237521	17.3783	6.42492	-1.4354	2.81186e-07
56	POLD2	MSTRG.14859	ENSG00000106628	24.3001	14.3088	-0.764019	3.08263e-07
57	PRELID1	MSTRG.12382	ENSG00000169230	139.794	88.4869	-0.659764	3.1188e-07
58	DBN1	MSTRG.12400	ENSG00000113758	66.1022	26.8737	-1.29847	3.35662e-07
59	FUOM	MSTRG.21307	ENSG00000148803	3.4453	0.915968	-1.91011	4.36913e-07
60	ACTG1	MSTRG.32852	ENSG00000184009	904.379	462.135	-0.96861	4.59539e-07
61	CLDN11	MSTRG.8591	ENSG00000013297	91.4056	35.0391	-1.38329	4.89079e-07
62	FSCN1	MSTRG.14386	ENSG00000075618	135.588	70.9769	-0.933794	7.91546e-07
63	LY6G5B	MSTRG.12920	ENSG00000240053	7.66405	2.81808	-1.44307	1.01876e-06
64	RPL22L1	MSTRG.8607	ENSG00000163584	35.7464	9.30054	-1.94229	1.01876e-06
65	RPL32	MSTRG.6938	ENSG00000144713	226.776	87.3502	-1.37638	1.17559e-06
66	ACTG2	MSTRG.4905	ENSG00000163017	33.1182	11.6223	-1.51065	1.19151e-06
67	PSMG4	MSTRG.12585	ENSG00000180822	2.98193	1.37214	-1.11925	1.28561e-06
68	ZYX	MSTRG.16176	ENSG00000159840	119.556	45.4083	-1.39664	1.2881e-06
69	RPL18	MSTRG.35804	ENSG00000063177	908.282	456.454	-0.992669	1.38015e-06
70	RPL18A	MSTRG.34697	ENSG00000105640	1232.21	634.365	-0.957869	1.4601e-06
71	INMT	MSTRG.14688	ENSG00000241644	4.4783	0.117318	-5.24254	1.51015e-06
72	RPL24	MSTRG.7917	ENSG00000114391	592.827	217.074	-1.44942	1.54759e-06
73	TUBA1C	MSTRG.24231	ENSG00000167553	280.133	201.526	-0.475139	1.60012e-06
74	CLEC3B	MSTRG.7296	ENSG00000163815	190.442	48.6507	-1.96879	1.71103e-06
75	S100A16	MSTRG.2542	ENSG00000188643	98.3802	42.0528	-1.22615	1.74475e-06
76	RPL8	MSTRG.17801	ENSG00000161016	937.265	527.237	-0.830005	1.79328e-06
77	HOXD13	MSTRG.5890	ENSG00000128714	2.17185	0.122716	-4.13448	2.28516e-06
78	RPSA	MSTRG.7200	ENSG00000168028	553.061	204.394	-1.43608	2.2866e-06
79	PDCD2	MSTRG.14225	ENSG00000071994	5.69025	2.80472	-1.02037	2.44954e-06
80	TUBA1A	MSTRG.24224	ENSG00000167552	685.477	463.468	-0.564636	2.67563e-06
81	RPL28	MSTRG.36156	ENSG00000108107	118.475	68.0343	-0.80024	2.78484e-06
82	RPS24	MSTRG.20550	ENSG00000138326	219.838	117.458	-0.904286	2.81096e-06
83	EEF1B2	gene-EEF1B2	ENSG00000114942	125.368	73.9651	-0.761248	3.06606e-06
84	ACTB	MSTRG.14379	ENSG00000075624	3211.78	1671.94	-0.941852	3.29373e-06
85	WDR1	MSTRG.9264	ENSG00000071127	189.967	107.56	-0.820604	3.89521e-06
86	RPS8	MSTRG.1187	ENSG00000142937	885.987	492.334	-0.847645	4.42721e-06
87	NFKBIE	MSTRG.13225	ENSG00000146232	13.0556	2.91998	-2.16025	4.53911e-06
88	LOXL4	MSTRG.20839	ENSG00000138131	193.473	52.4195	-1.88393	5.16328e-06
89	YIPF3	MSTRG.13186	ENSG00000137207	93.7394	60.4836	-0.632104	5.42701e-06
90	MTMR14	MSTRG.6846	ENSG00000163719	6.77591	3.11267	-1.12201	5.74148e-06
91	RPL27A	MSTRG.21599	ENSG00000166441	170.312	87.5652	-0.959738	5.76454e-06
92	RPS14	MSTRG.12098	ENSG00000164587	236.642	135.496	-0.804453	5.77283e-06
93	ECI2	MSTRG.12609	ENSG00000198721	35.4449	21.5859	-0.715465	6.80983e-06
94	TAGLN2	MSTRG.2766	ENSG00000158710	286.617	179.85	-0.672326	6.81243e-06
95	GLRX	MSTRG.11445	ENSG00000173221	169.008	74.7466	-1.177	6.84703e-06
96	RPS26	MSTRG.10032	ENSG00000197728	180.945	103.694	-0.803212	8.49413e-06
97	TUBB	MSTRG.19645	ENSG00000196230	316.788	232.256	-0.447802	8.60513e-06
98	CDC37	MSTRG.34279	ENSG00000105401	123.471	87.1977	-0.501806	1.00285e-05
99	SEC13	MSTRG.6906	ENSG00000157020	68.4078	34.6165	-0.98268	1.10437e-05
100	GAS6	MSTRG.26287	ENSG00000183087	508.219	238.184	-1.09337	1.12737e-05
101	FOXD1	MSTRG.11219	ENSG00000251493	2.55157	0.347281	-2.87362	1.22237e-05
102	OAF	MSTRG.23387	ENSG00000184232	43.5432	25.1156	-0.793837	1.25848e-05
103	PRSS3	MSTRG.18115	ENSG00000010438	1.49778	0	-10.5496	1.4585e-05
104	THOC7	MSTRG.7712	ENSG00000163634	19.0813	9.36123	-1.02731	1.4585e-05
105	ANXA2	MSTRG.28156	ENSG00000182718	354.613	223.342	-0.666985	1.47334e-05
106	CCT7	MSTRG.4902	ENSG00000135624	114.088	83.945	-0.442623	1.50609e-05
107	TMEM158	MSTRG.7301	ENSG00000249992	62.4103	27.1055	-1.20317	1.50703e-05
108	IMPDH1	MSTRG.15902	ENSG00000106348	38.9992	17.7911	-1.13224	1.66231e-05
109	PPP4C	MSTRG.29790	ENSG00000149923	69.4421	42.5791	-0.705651	1.69343e-05
110	DYNLT1	MSTRG.14111	ENSG00000146425	53.9664	21.5952	-1.32131	1.80159e-05
111	RPL6	MSTRG.16090	ENSG00000089009	16.6249	7.42197	-1.16336	1.9559e-05
112	RPL22	MSTRG.221	ENSG00000116251	115.309	77.9388	-0.565089	2.1915e-05
113	TOMM34	MSTRG.37091	ENSG00000025772	31.0427	16.4496	-0.916163	2.48934e-05
114	PHB1	MSTRG.32189	ENSG00000167085	71.3698	50.4463	-0.500556	2.76056e-05
115	POLR2E	MSTRG.33692	ENSG00000099817	74.2345	42.1029	-0.818153	2.92217e-05
116	MMP24	MSTRG.36904	ENSG00000125966	31.352	20.0513	-0.644834	3.35368e-05
117	RPL29	MSTRG.7573	ENSG00000162244	618.803	276.066	-1.16447	3.37356e-05
118	EIF3B	MSTRG.14279	ENSG00000106263	40.5489	27.0222	-0.585502	3.54168e-05
119	RPL38	MSTRG.32612	ENSG00000172809	140.804	72.4871	-0.957878	3.54475e-05
120	RPS3	MSTRG.22851	ENSG00000149273	440.615	239.066	-0.882105	3.98776e-05
121	RPL21	MSTRG.21169	ENSG00000122026	78.9111	41.7512	-0.918395	4.18565e-05
122	GNAI2	MSTRG.7501	ENSG00000114353	77.4424	46.7135	-0.729271	4.73948e-05
123	CENPW	MSTRG.13798	ENSG00000203760	1.75444	0.636882	-1.46047	5.23955e-05
124	IL17RC	MSTRG.6867	ENSG00000163702	6.50441	2.77321	-1.22956	5.73749e-05
125	PHLDA2	gene-PHLDA2	ENSG00000181649	72.5267	47.0718	-0.623639	5.74635e-05
126	NPTX2	MSTRG.15475	ENSG00000106236	7.63992	0	-12.8995	5.85388e-05
127	EIF3I	MSTRG.823	ENSG00000084623	47.9404	34.6555	-0.468145	6.32419e-05
128	RPS9	MSTRG.36107	ENSG00000170889	47.3193	21.9682	-1.10698	6.41243e-05
129	HCLS1	MSTRG.8065	ENSG00000180353	3.75146	0	-11.8736	7.24132e-05
130	RPS3A	MSTRG.28155	ENSG00000145425	408.644	234.742	-0.799764	7.71887e-05
131	RPS17	MSTRG.28707	ENSG00000182774	377.551	202.031	-0.902089	8.68945e-05
132	RPL37A	MSTRG.6357	ENSG00000197756	202.795	111.668	-0.860806	9.03207e-05
133	APRT	MSTRG.30673	ENSG00000198931	121.19	74.8729	-0.694744	9.72509e-05
134	ECHS1	MSTRG.21308	ENSG00000127884	103.085	71.9925	-0.517908	9.91892e-05
135	RPL4	MSTRG.28325	ENSG00000174444	539.607	321.983	-0.744922	0.000100056
136	HBA1	MSTRG.29045	ENSG00000206172	2.51397	0.0952082	-4.70824	0.00010145
137	HBA2		ENSG00000188536
138	NHP2	MSTRG.12431	ENSG00000145912	105.278	61.7415	-0.769876	0.000106305
139	MRPL18	MSTRG.14133	ENSG00000112110	23.232	13.1774	-0.817999	0.000135332
140	RPS2	MSTRG.37107	ENSG00000140988	39.0468	23.0443	-0.760766	0.000139311
141	RPS16	MSTRG.35292	ENSG00000105193	814.427	480.177	-0.762217	0.000147425
142	CTXN1	MSTRG.34134	ENSG00000178531	15.9135	7.9538	-1.00045	0.000150422
143	MT2A	MSTRG.30053	ENSG00000125148	822.85	429.067	-0.939424	0.000152897
144	AURKA	MSTRG.37260	ENSG00000087586	19.2537	7.31787	-1.39552	0.000154993
145	CCT3	MSTRG.2698	ENSG00000163468	91.8581	68.4142	-0.425105	0.000164148
146	ATP5MJ	MSTRG.27522	ENSG00000156411	56.0943	33.7065	-0.734811	0.000168624
147	RPL11	MSTRG.547	ENSG00000142676	606.722	352.75	-0.782388	0.000176824
148	PTX3	MSTRG.8493	ENSG00000163661	104.546	41.79	-1.32289	0.000182314
149	RPL27	MSTRG.31864	ENSG00000131469	478.714	270.01	-0.826152	0.000188413
150	CNN2	MSTRG.33685	ENSG00000064666	206.884	98.5826	-1.06941	0.000194534
151	STIP1	MSTRG.22297	ENSG00000168439	43.8917	30.339	-0.532762	0.000199898
152	PTCD1	MSTRG.15493	ENSG00000106246	19.5067	13.4158	-0.540006	0.000204502
153	RPS13	MSTRG.21722	ENSG00000110700	710.145	448.398	-0.663331	0.000204964
154	KHDRBS3	MSTRG.17617	ENSG00000131773	2.23907	0.968507	-1.20822	0.000216755
155	NT5DC2	MSTRG.7609	ENSG00000168268	33.6962	12.972	-1.37712	0.0002365
156	RPS28	MSTRG.34147	ENSG00000233927	280.44	137.012	-1.03339	0.000243548
157	DNPH1	MSTRG.13171	ENSG00000112667	36.747	20.4339	-0.846633	0.000244458
158	RPL7A	gene-RPL7A	ENSG00000148303	357.652	215.85	-0.72852	0.000245967
159	ZNF703	MSTRG.16757	ENSG00000183779	20.5991	9.15093	-1.1705	0.000249047
160	TSPAN9	MSTRG.23606	ENSG00000011105	27.9996	13.9408	-1.00605	0.000250399
161	LINC00269	MSTRG.26299	ENSG00000215162	4.27679	0.856917	-2.31795	0.000252659
162	QARS1	MSTRG.7444	ENSG00000172053	56.0221	33.3325	-0.749048	0.0002801
163	RPL23A	MSTRG.31426	ENSG00000198242	521.676	348.048	-0.583865	0.000280212
164	MYL6B	MSTRG.24498	ENSG00000196465	978.497	397.71	-1.29885	0.000288875
165	UQCC2	MSTRG.12962	ENSG00000137288	33.8477	15.0061	-1.17345	0.000314578
166	RPL23	MSTRG.31671	ENSG00000125691	164.337	103.151	-0.671896	0.000316391
167	MOXD1	MSTRG.13840	ENSG00000079931	40.1122	20.3279	-0.980546	0.000331793
168	TXNDC5	MSTRG.12642	ENSG00000239264	95.6403	58.3222	-0.713563	0.000339569
169	RPL7	MSTRG.17098	ENSG00000147604	294.15	182.936	-0.685209	0.000342337
170	RPL13A	MSTRG.25967	ENSG00000142541	72.1215	36.783	-0.97137	0.000342337
171	FUCA2	MSTRG.13940	ENSG00000001036	40.3951	24.3917	-0.727763	0.000347974
172	PRMT1	MSTRG.35929	ENSG00000126457	52.503	34.0755	-0.62365	0.000354872
173	ECHDC3	MSTRG.19799	ENSG00000134463	1.71508	0.0785181	-4.43169	0.000355976
174	RPL17	MSTRG.1900	ENSG00000265681	79.0611	44.8258	-0.818626	0.000399405
175	RPS15	MSTRG.33736	ENSG00000115268	345.481	185.209	-0.899447	0.000427949
176	CCDC167	MSTRG.13058	ENSG00000198937	21.4981	7.92155	-1.44024	0.000430083
177	ACAA1	MSTRG.7159	ENSG00000060971	23.318	11.9525	-0.964068	0.000430875
178	FTL	MSTRG.35843	ENSG00000087086	7913.8	4728.54	-0.742976	0.000437
179	NELFE	gene-NELFE-2	ENSG00000204356	5.74101	1.97507	-1.53892	0.000437032
180	NOP16	MSTRG.12357	ENSG00000048162	20.0458	12.0092	-0.739109	0.000483812
181	COPE	MSTRG.34767	ENSG00000105669	112.999	72.5657	-0.638943	0.00048434
182	CYC1	MSTRG.17753	ENSG00000179091	65.395	45.0445	-0.53782	0.00050768
183	RPL13A	MSTRG.35902	ENSG00000142541	1498.54	963.064	-0.637855	0.00050768
184	SERINC2	MSTRG.790	ENSG00000168528	48.7038	24.4562	-0.993806	0.00050768
185	EIF4E2	MSTRG.6591	ENSG00000135930	17.9535	12.6183	-0.508707	0.000515944
186	ULBP2	MSTRG.14017	ENSG00000131015	3.28124	0.505021	-2.69741	0.000517169
187	TMEM14C	MSTRG.12662	ENSG00000111843	52.8307	33.963	-0.637398	0.000528653
188	RRT15	MSTRG.40430	ENSG00000212667	13.3301	0.560647	-4.56899	0.000541293
189	RAC2	MSTRG.38535	ENSG00000128340	11.7242	2.00454	-2.54755	0.000543726
190	SUMO2	MSTRG.32640	ENSG00000188612	32.6779	25.1698	-0.376609	0.000546117
191	CITED2	MSTRG.13907	ENSG00000164442	112.12	61.8987	-0.857053	0.000558051
192	SEPTIN9	MSTRG.32734	ENSG00000184640	97.6624	66.6758	-0.550633	0.000568461
193	OAZ1	MSTRG.33791	ENSG00000104904	585.587	401.728	-0.543663	0.000573281
194	ADISSP	MSTRG.36531	ENSG00000101220	25.9935	15.6061	-0.736004	0.000610288
195	HDDC2	MSTRG.13792	ENSG00000111906	11.4204	6.7854	-0.751022	0.000643375
196	MZT2A	MSTRG.5573	ENSG00000173272	11.6863	6.51314	-0.843297	0.000644805
197	CMTM7	MSTRG.7093	ENSG00000153551	12.4529	6.59731	-0.916423	0.000644805
198	C16orf89	MSTRG.32715	ENSG00000153446	29.9748	17.4274	-0.782362	0.000668008
199	RPL26	MSTRG.31067	ENSG00000161970	364.447	212.261	-0.779865	0.000673988
200	MTHFD1L	MSTRG.14030	ENSG00000120254	1.42058	0.855609	-0.730787	0.000677277
201	RPL35A	MSTRG.8953	ENSG00000182899	143.587	62.9792	-1.18897	0.000699268
202	RPL5	MSTRG.1763	ENSG00000122406	486.969	296.637	-0.715132	0.000707106
203	BTF3	MSTRG.11221	ENSG00000145741	199.05	146.262	-0.444578	0.000710055
204	NHERF1	MSTRG.32617	ENSG00000109062	10.0115	5.41926	-0.885372	0.000710055
205	EIF5AL1	MSTRG.20567	ENSG00000253626	12.4097	6.79989	-0.867787	0.000717328
206	PPP2R1A	MSTRG.36042	ENSG00000105568	61.991	46.0078	-0.430173	0.000752185
207	LYRM4	MSTRG.12620	ENSG00000214113	4.96368	2.45647	-1.01452	0.000755639
208	TSC22D4	MSTRG.15571	ENSG00000166925	19.4461	12.4487	-0.643437	0.000779322
209	MYL9	MSTRG.36964	ENSG00000101335	617.58	246.303	-1.32619	0.000788318
210	RPS15A	MSTRG.29537	ENSG00000134419	144.646	81.7573	-0.823105	0.000798162
211	NDUFS5	MSTRG.992	ENSG00000168653	175.136	100.114	-0.806819	0.000809709
212	RPS21	MSTRG.37364	ENSG00000171858	380.112	198.894	-0.934422	0.000813533
213	JAGN1	MSTRG.6864	ENSG00000171135	25.2513	15.0105	-0.750342	0.000815509
214	RPL31	MSTRG.5250	ENSG00000071082	133.795	80.0551	-0.740953	0.000835573
215	ARPC1A	MSTRG.15488	ENSG00000241685	77.6033	56.3809	-0.460906	0.000840692
216	RPLP2	MSTRG.21397	ENSG00000177600	1378.92	683.516	-1.01249	0.000859695
217	PSMD2	MSTRG.8730	ENSG00000175166	80.9402	52.0257	-0.637622	0.000864953
218	RPL34	MSTRG.9978	ENSG00000109475	279.159	144.168	-0.95333	0.000874256
219	NDUFS6	MSTRG.10633	ENSPTRG00000016706	115.873	66.607	-0.798784	0.000896512
220	RPL9	MSTRG.28701	ENSG00000163682	339.186	174.827	-0.956145	0.000938681
221	RPL9P7		ENSG00000238103
222	RPL9P8		HGNC:30334
223	TWF2	MSTRG.7579	ENSG00000247596	54.434	30.9191	-0.815988	0.000943338
224	RPS19	MSTRG.35403	ENSG00000105372	316.046	173.314	-0.866737	0.000973725
225	ODC1	MSTRG.4058	ENSG00000115758	55.6679	35.4818	-0.649752	0.000994022
226	PXMP2	MSTRG.25526	ENSG00000176894	13.9327	4.9594	-1.49005	0.00100275
227	PUF60	MSTRG.17717	ENSG00000179950	8.77552	5.43747	-0.690447	0.00101591
228	BCL2L12	MSTRG.35928	ENSG00000126453	11.9851	5.55733	-1.10864	0.00105054
229	NME2	MSTRG.32273	ENSG00000243678	208.52	135.182	-0.625275	0.00105782
230	ARPC1B	MSTRG.15491	ENSG00000130429	27.2722	19.1452	-0.510425	0.00110534
231	SPHK1	MSTRG.32708	ENSG00000176170	25.0385	10.0475	-1.31722	0.00112977
232	FLOT1	gene-FLOT1	ENSG00000137312	9.66396	4.87156	-0.988083	0.00113068
233	COX7A2	MSTRG.13436	ENSG00000112695	14.2974	3.99299	-1.83995	0.00115046
234	ATP5MC2	MSTRG.24398	ENSG00000135390	86.0748	60.8652	-0.499966	0.00115197
235	FLOT2	MSTRG.31433	ENSG00000132589	18.1654	8.21342	-1.14504	0.0011734
236	CAMK1	MSTRG.6852	ENSG00000134072	11.5199	5.67485	-1.02135	0.00120458
237	TBX5	MSTRG.25221	ENSG00000089225	1.87213	0.0599126	-4.94257	0.00121125
238	TMSB10	MSTRG.5015	ENSG00000034510	30.1624	6.35709	-2.24613	0.00124659
239	RPS5	MSTRG.36374	ENSG00000083845	142.61	86.2266	-0.72586	0.001306
240	MVD	MSTRG.30654	ENSG00000167508	81.7908	35.4951	-1.2043	0.00135204
241	NDUFA11	MSTRG.34051	ENSG00000174886	31.4337	18.1235	-0.794415	0.00137084
242	UQCRH	MSTRG.1251	ENSG00000173660	125.068	91.5262	-0.450455	0.00148799
243	RPL36A	MSTRG.21720	ENSG00000241343	210.632	120.804	-0.802059	0.00149029
244	CAPG	MSTRG.5033	ENSG00000042493	27.4474	16.4958	-0.734541	0.00149139
245	RPL36	MSTRG.34037	ENSG00000130255	338.365	182.506	-0.890637	0.00151635
246	RUVBL1	MSTRG.8171	ENSG00000175792	14.7158	8.64781	-0.766893	0.00166548
247	PFDN6	MSTRG.40684	ENSG00000204220	6.0745	2.04877	-1.56754	0.00167327
248	RPL13	MSTRG.30699	ENSG00000167526	199.638	117.776	-0.761329	0.00168788
249	PLAC9	MSTRG.41849	ENSG00000189129	1.65852	0	-10.6966	0.00171026
250	RUVBL2	MSTRG.35847	ENSG00000183207	34.3135	18.4529	-0.894893	0.00171517
251	MRPS18A	MSTRG.13205	ENSG00000096080	21.6158	11.6554	-0.891022	0.00174222
252	RRP9	MSTRG.7562	ENSG00000114767	15.0719	8.21687	-0.875121	0.00177439
253	RPS27A	MSTRG.4650	ENSG00000143947	556.77	298.081	-0.901375	0.00178584
254	MEST	MSTRG.15967	ENSG00000106484	22.4289	2.99643	-2.90363	0.0018105
255	MZT2B	MSTRG.5547	ENSG00000152082	17.6276	10.5116	-0.745806	0.00184
256	AHSA1	MSTRG.27201	ENSG00000100591	62.5635	43.2285	-0.533329	0.00184667
257	SH3BGRL3	MSTRG.650	ENSG00000142669	740.244	498.483	-0.570456	0.00184667
258	SNRPD2	MSTRG.35657	ENSG00000125743	108.32	67.8931	-0.673961	0.0018959
259	SFT2D1	MSTRG.14167	ENSG00000198818	26.4586	15.7863	-0.745022	0.00193257
260	RPS20	MSTRG.16937	ENSG00000008988	267.366	158.305	-0.756107	0.00193257
261	MRPL52	MSTRG.26392	ENSG00000172590	35.3411	21.721	-0.702229	0.00194013
262	ADA2	MSTRG.37975	ENSG00000093072	1.39389	0	-10.4459	0.00194976
263	PHB2	MSTRG.23749	ENSG00000215021	95.9515	74.1294	-0.372256	0.00197362
264	PDLIM7	MSTRG.12405	ENSG00000196923	117.609	63.5702	-0.887568	0.00211932
265	BAK1	MSTRG.12957	ENSG00000030110	12.7467	5.95536	-1.09774	0.00211932
266	PPP1R14B	MSTRG.22312	ENSG00000173457	73.2299	50.2346	-0.543744	0.00213074
267	EEF1G	MSTRG.16016	ENSG00000254772	78.8803	43.3892	-0.862314	0.00226405
268	PSMB6	MSTRG.30882	ENSG00000142507	132.158	93.4096	-0.500613	0.00227568
269	TMEM115	MSTRG.7525	ENSG00000126062	42.5439	28.2664	-0.589845	0.00232869
270	SLC39A7	gene-SLC39A7	ENSG00000112473	14.7916	7.72997	-0.936155	0.00233497
271	MAP2K2	MSTRG.33938	ENSG00000126934	92.9713	48.6545	-0.934197	0.00239177
272	ABRACL	MSTRG.13903	ENSG00000146386	14.7997	7.44927	-0.990301	0.00246592
273	TOMM40	MSTRG.35583	ENSG00000130204	16.0582	10.5841	-0.601357	0.00246592
274	PSMC3	MSTRG.22017	ENSG00000165916	76.0204	50.8512	-0.580097	0.00261653
275	RPL14	MSTRG.7213	ENSG00000188846	41.6511	19.6335	-1.08499	0.00262692
276	CDA	MSTRG.477	ENSG00000158825	7.41717	0.365644	-4.33861	0.00263331
277	LBHD1	MSTRG.22222	ENSG00000162194	6.64622	4.34144	-0.614243	0.00264484
278	C1QBP	MSTRG.30941	ENSG00000108561	78.3732	56.6015	-0.469513	0.00265284
279	COX5B	MSTRG.5183	ENSG00000135940	86.4653	53.0536	-0.704661	0.0029596
280	RPS11	MSTRG.35905	ENSG00000142534	780.17	496.351	-0.652426	0.00306048
281	C11orf68	MSTRG.22472	ENSG00000175573	59.9447	35.9135	-0.73909	0.00307228
282	SRM	MSTRG.324	ENSG00000116649	127.245	84.5356	-0.589972	0.00329055
283	MEA1	MSTRG.13150	ENSG00000124733	38.8991	22.0569	-0.818479	0.00332957
284	ZDHHC12	MSTRG.19334	ENSG00000160446	24.0544	16.7941	-0.518319	0.00335829
285	MRPL20	MSTRG.104	ENSG00000242485	42.4852	27.9165	-0.605825	0.00344219
286	BYSL	MSTRG.13093	ENSG00000112578	8.0963	4.71716	-0.779216	0.00344219
287	UCHL3	MSTRG.25995	ENSG00000118939	7.03281	3.98971	-0.817659	0.00345534
288	ADIRF	MSTRG.20617	ENSG00000148671	14.2041	6.97288	-1.02638	0.00345799
289	NOC2L	MSTRG.37	ENSG00000188976	34.2872	20.2837	-0.757317	0.00372313
290	MGLL	MSTRG.8166	ENSG00000074416	82.8811	48.4831	-0.77355	0.00388862
291	RPS10	MSTRG.12990	ENSG00000124614	2.81249	0.877981	-1.67846	0.00402708
292	RAN	MSTRG.25490	ENSG00000132341	131.947	102.762	-0.360651	0.00403649
293	YWHAE	MSTRG.30783	ENSG00000108953	105.314	80.5293	-0.387112	0.00403649
294	ETV4	MSTRG.31922	ENSG00000175832	9.25706	3.23648	-1.51584	0.00406307
295	MAGED4	MSTRG.39387	ENSG00000154545	6.85383	2.66858	-1.36051	0.00406392
296	MAGED4B		ENSG00000187243
297	CCDC124	MSTRG.34703	ENSG00000007080	50.4201	28.5741	-0.819267	0.00408818
298	TAAR1	MSTRG.37493	ENSG00000146399	38.9926	3.6513	-3.41636	0.00416511
299	ATP5F1D	MSTRG.33708	ENSG00000099624	130.844	69.0557	-0.922007	0.00416654
300	TOMT	MSTRG.22767	ENSG00000284844	4.49539	2.69426	-0.738346	0.00422533
301	PLEKHO1	MSTRG.2379	ENSG00000023902	13.5562	7.16471	-0.919878	0.00423228
302	ALDOA	MSTRG.29784	ENSG00000149925	335.479	247.227	-0.440387	0.00428178
303	FAU	MSTRG.22369	ENSG00000149806	265.326	173.624	-0.611796	0.00428308
304	UQCRHL	MSTRG.398	ENSG00000233954	17.3802	9.95574	-0.803785	0.00428308
305	TRIP6	MSTRG.15601	ENSG00000087077	101.803	77.3939	-0.39548	0.00433828
306	TLE5	MSTRG.33845	ENSG00000104964	204.18	138.885	-0.555947	0.00433828
307	PSMD8	MSTRG.35265	ENSG00000099341	146.689	104.94	-0.483191	0.00466772
308	FAM86C1P	MSTRG.41676	ENSG00000158483	1.40145	0.339072	-2.04403	0.00473246
309	RPL15	MSTRG.27296	ENSG00000174748	17.8192	7.12953	-1.32143	0.00474239
310	TSPAN14	MSTRG.20591	ENSG00000108219	14.6494	6.45736	-1.1817	0.00483372
311	NDUFB9	MSTRG.17548	ENSG00000147684	59.0168	40.84	-0.531132	0.00484059
312	XG	MSTRG.39016	ENSG00000124343	2.11818	0.308003	-2.77781	0.00486191
313	NOL7	MSTRG.12704	ENSG00000225921	14.6861	8.21633	-0.837812	0.00486902
314	TMSB15B	MSTRG.39721	ENSG00000158427	2.22744	0.138413	-3.9986	0.00487608
315	ARF5	MSTRG.15887	ENSG00000004059	102.504	56.9212	-0.848635	0.00493703
316	PDCD5	MSTRG.34987	ENSG00000105185	19.121	14.0242	-0.44722	0.00493703
317	TMSB4X	MSTRG.9880	ENSG00000205542	402.392	259.913	-0.630569	0.00493925
318	MRPL12	MSTRG.32869	ENSG00000262814	80.3327	40.4333	-0.990425	0.00505127
319	UBC	MSTRG.30120	ENSG00000150991	33.2464	17.8169	-0.899911	0.00521934
320	CHCHD2	MSTRG.14985	ENSG00000106153	185.004	137.827	-0.424693	0.00526066
321	PTMS	MSTRG.23702	ENSG00000159335	450.5	248.901	-0.855951	0.00526305
322	GPX4	MSTRG.33697	ENSG00000167468	292.151	172.788	-0.757706	0.00526738
323	ANP32B	MSTRG.18782	ENSG00000136938	69.6362	47.788	-0.543181	0.00528276
324	ARHGDIB	MSTRG.23936	ENSG00000111348	1.98724	0.220153	-3.16838	0.00529146
325	RPS6KB2	MSTRG.22618	ENSG00000175634	19.1887	12.0645	-0.66945	0.00553512
326	FANCE	MSTRG.13009	ENSG00000112039	2.72989	0.222542	-3.61075	0.00560538
327	CFDP1	MSTRG.30428	ENSG00000153774	4.81412	3.30909	-0.540699	0.00562495
328	SNRPA1	MSTRG.28997	ENSG00000131876	20.3372	12.6993	-0.679328	0.00563366
329	PTRHD1	MSTRG.4202	ENSG00000184924	20.399	11.2635	-0.856791	0.00564283
330	DBI	MSTRG.5461	ENSG00000155368	108.197	69.1205	-0.646461	0.00564831
331	MSRB1	MSTRG.29206	ENSG00000198736	8.32405	4.57417	-0.863635	0.00565215
332	TGFB1I1	MSTRG.29903	ENSG00000140682	68.0994	39.7005	-0.778468	0.00569632
333	LMNA	MSTRG.2678	ENSG00000160789	173.634	81.5103	-1.09099	0.0057307
334	CENPV	MSTRG.31190	ENSG00000166582	2.91967	0.244604	-3.57189	0.00597667
335	BOP1	MSTRG.17769	ENSG00000261236	27.8426	14.7803	-0.913571	0.00598345
336	GALNT6	MSTRG.24311	ENSG00000139629	3.77206	0.128388	-4.86596	0.00608429
337	RPS25	MSTRG.11599	ENSG00000118181	257.394	143.985	-0.83805	0.00612209
338	PPIF	MSTRG.20561	ENSG00000108179	65.8196	44.0698	-0.578715	0.00629203
339	PTGES2	MSTRG.19274	ENSG00000148334	19.6685	12.181	-0.691212	0.0063558
340	NDUFV1	MSTRG.22636	ENSG00000167792	91.455	43.0061	-1.0885	0.00637179
341	H2AZ1	MSTRG.9922	ENSG00000164032	231.649	136.483	-0.763213	0.00639639
342	RPL29	MSTRG.13757	ENSG00000162244	2.13237	0.312589	-2.76619	0.0064774
343	NDUFB4	MSTRG.8058	ENSG00000065518	33.3383	19.1082	-0.802953	0.00670481
344	AXL	MSTRG.35368	ENSG00000167601	57.41	35.0995	-0.709837	0.0067203
345	WFDC3	MSTRG.37113	ENSG00000124116	0.78699	0.129268	-2.59669	0.00695208
346	UBXN6	MSTRG.33961	ENSG00000167671	41.6593	27.7542	-0.585915	0.00712338
347	FDPS	MSTRG.2637	ENSG00000160752	203.851	140.114	-0.540906	0.00743465
348	SMAGP	MSTRG.24308	ENSG00000170545	17.7204	11.7822	-0.588753	0.00756423
349	BRK1	MSTRG.6892	ENSG00000254999	145.775	99.8917	-0.545301	0.0076521
350	MLF2	MSTRG.23698	ENSG00000089693	173.529	133.194	-0.381652	0.00787271
351	MRPL23	gene-MRPL23	ENSG00000214026	3.20826	1.35067	-1.2475	0.00794143
352	BEX1	MSTRG.39727	ENSG00000133169	3.33879	0.131075	-4.66033	0.00800713
353	RPL4	MSTRG.8761	ENSG00000174444	15.382	7.28218	-1.0787	0.00817971
354	RWDD1	MSTRG.13743	ENSG00000111832	7.52468	4.09713	-0.876856	0.0082571
355	PTK7	MSTRG.13162	ENSG00000112655	36.1173	23.5191	-0.618837	0.00827383
356	COX4I1	MSTRG.30555	ENSG00000131143	161.472	111.849	-0.529726	0.00829137
357	COQ3	MSTRG.13598	ENSG00000132423	3.02401	0.782615	-1.94872	0.0083775
358	MEIS3	MSTRG.35762	ENSG00000105419	5.80406	3.18682	-0.864742	0.00846601
359	SMIM29	MSTRG.12980	ENSG00000186577	35.2306	24.3445	-0.533215	0.00862778
360	RPL35	MSTRG.19162	ENSG00000136942	977.297	584.182	-0.742379	0.00871141
361	TEX29	MSTRG.26230	ENSG00000153495	1.92041	0.548286	-1.80654	0.00880476
362	LMNB2	MSTRG.33811	ENSG00000176619	18.6507	16.6322	-0.165235	0.0089024
363	ATP5MC1	MSTRG.32169	ENSG00000159199	170.948	116.703	-0.550712	0.00904033
364	FIS1	MSTRG.15629	ENSG00000214253	145.876	71.1235	-1.03634	0.00935526
365	LOXL3	MSTRG.4954	ENSG00000115318	3.74575	0.854042	-2.13157	0.00980678
366	TMT1B	MSTRG.24454	ENSG00000170439	1.44936	0.0129527	-6.69973	0.00999334
367	GNB2	MSTRG.15588	ENSG00000172354	176.917	132.397	-0.418193	0.00999954
368	FKBP8	MSTRG.34741	ENSG00000105701	186.519	133.475	-0.482752	0.00999954
369	SEC61A1	MSTRG.8170	ENSG00000058262	204.965	147.834	-0.471402	0.0100157
370	KARS1	MSTRG.30440	ENSG00000065427	53.9807	42.214	-0.354716	0.0100351
371	ZNF428	MSTRG.35506	ENSG00000131116	36.6433	21.331	-0.780567	0.0101002
372	TUFM	MSTRG.29705	ENSG00000178952	80.3777	64.0942	-0.326597	0.0101398
373	EBNA1BP2	MSTRG.1125	ENSG00000117395	39.4856	20.0271	-0.97934	0.0101602
374	PDLIM4	MSTRG.11721	ENSG00000131435	33.81	18.3899	-0.878499	0.0101695
375	MRPL37	MSTRG.1386	ENSG00000116221	66.4711	50.5655	-0.394567	0.0102113
376	NT5C	MSTRG.32638	ENSG00000125458	15.9542	10.3982	-0.617555	0.0102607
377	RPLP0	MSTRG.12254	ENSG00000089157	122.645	58.7493	-1.06183	0.0104562
378	HARS1	MSTRG.11944	ENSG00000170445	1.24082	0.0803807	-3.93162	0.0104666
379	CCDC12	MSTRG.7327	ENSG00000160799	5.93183	2.9849	-0.990553	0.0104947
380	UBE2S	MSTRG.31164	ENSG00000108106	13.9619	6.99744	-0.996495	0.0106183
381	DCXR	MSTRG.32907	ENSG00000169738	31.6277	16.8118	-0.911673	0.0106762
382	PPDPF	MSTRG.37400	ENSG00000125534	286.557	182.536	-0.650639	0.0106762
383	BEGAIN	MSTRG.27370	ENSG00000183092	1.19848	0.0392767	-4.89631	0.0107853
384	SDC4	MSTRG.37098	ENSG00000124145	85.7762	53.7852	-0.673356	0.0108936
385	TRIM55	MSTRG.17000	ENSG00000147573	0.922716	0	-9.85131	0.0110514
386	ANXA2P2	MSTRG.18112	ENSG00000231991	41.5565	29.1116	-0.513462	0.0110514
387	NPW	MSTRG.29210	ENSG00000183971	4.35867	0.860764	-2.33886	0.0112537
388	GATA2	MSTRG.8174	ENSG00000179348	5.60625	0.459082	-3.60733	0.0112705
389	PLSCR3	gene-PLSCR3	ENSG00000187838	30.0628	21.49	-0.484294	0.0114344
390	CAVIN1	MSTRG.31814	ENSG00000177469	234.705	156.182	-0.587622	0.011524
391	COPS6	MSTRG.15536	ENSG00000168090	100.062	76.1835	-0.393332	0.0116042
392	ETFB	MSTRG.36013	ENSG00000105379	37.562	18.8201	-0.996963	0.0116249
393	AURKAIP1	MSTRG.98	ENSG00000175756	79.7866	49.3352	-0.693519	0.011734
394	RHOC	MSTRG.2031	ENSG00000155366	390.133	265.932	-0.552905	0.011799
395	RPLP0P6	MSTRG.4446	ENSG00000213553	190.067	143.653	-0.40392	0.011807
396	NDUFAF3	MSTRG.7439	ENSG00000178057	10.9496	6.27539	-0.803004	0.0118512
397	PPIA	MSTRG.12762	ENSG00000196262	48.3018	7.54032	-2.67922	0.0119467
398	B4GALT7	MSTRG.12418	ENSG00000027847	8.85098	5.71802	-0.630232	0.0120294
399	NDUFB2	MSTRG.16141	ENSG00000090266	222.662	153.183	-0.539593	0.0120543
400	ZNF628	MSTRG.36161	ENSG00000197483	6.64165	2.30828	-1.52432	0.0120709
401	RPL3	MSTRG.27338	ENSG00000100316	38.5706	21.3125	-0.855773	0.0120893
402	CHCHD6	MSTRG.8146	ENSG00000159685	7.56185	4.13956	-0.869105	0.0121382
403	ALYREF	MSTRG.32886	ENSG00000183684	36.1458	25.7188	-0.490989	0.0121956
404	MMAB	MSTRG.25108	ENSG00000139428	13.3708	6.41752	-1.05888	0.0122274
405	NCLN	MSTRG.33855	ENSG00000125912	53.1339	35.0416	-0.60055	0.0122723
406	NUDC	MSTRG.668	ENSG00000090273	45.8086	28.769	-0.671085	0.0123953
407	HSPBP1	MSTRG.36141	ENSG00000133265	20.9161	10.1398	-1.04452	0.0125374
408	ACP3	MSTRG.8244	ENSG00000014257	7.79669	0.843376	-3.20709	0.0128753
409	NECTIN2	MSTRG.35579	ENSG00000130202	36.4053	23.9028	-0.606946	0.012945
410	RAB34	MSTRG.31422	ENSG00000109113	87.3628	65.6421	-0.412391	0.0129819
411	UBALD2	MSTRG.32695	ENSG00000185262	37.3522	21.907	-0.769771	0.0129986
412	DHDDS	MSTRG.655	ENSG00000117682	22.3949	17.8979	-0.323362	0.0131313
413	TRIM28	MSTRG.36401	ENSG00000130726	78.3542	55.0247	-0.509923	0.0133392
414	TPBG	gene-TPBG	ENSG00000146242	19.6774	11.4163	-0.785394	0.0133397
415	KCNIP3	MSTRG.5129	ENSG00000115041	7.64287	4.3113	-0.825844	0.0133608
416	RNH1	MSTRG.21358	ENSG00000023191	49.7919	36.8031	-0.436075	0.0135638
417	U2AF1	MSTRG.37479	ENSG00000160201	12.4747	8.68092	-0.523034	0.0137125
418	MOSPD3	MSTRG.15584	ENSG00000106330	16.594	11.3677	-0.545679	0.0138809
419	GSTP1	MSTRG.22634	ENSG00000084207	625.819	414.937	-0.592853	0.0141168
420	GUK1	MSTRG.3658	ENSG00000143774	61.0562	40.7532	-0.583211	0.014161
421	GPX1	MSTRG.7472	ENSG00000233276	461.61	314.178	-0.555089	0.0141707
422	STUB1	MSTRG.29095	ENSG00000103266	118.634	67.521	-0.813099	0.0142802
423	RPL30	MSTRG.17293	ENSG00000156482	624.777	428.516	-0.543991	0.0144397
424	RAB1B	MSTRG.22511	ENSG00000174903	124.035	101.744	-0.2858	0.0144397
425	EEF1D	MSTRG.17704	ENSG00000104529	17.4532	10.8339	-0.687887	0.0145265
426	SH3TC1	MSTRG.9241	ENSG00000125089	0.92925	0	-9.86147	0.0145265
427	DAPK3	MSTRG.33915	ENSG00000167657	49.1047	27.2276	-0.850766	0.014726
428	RNF126	MSTRG.33633	ENSG00000070423	24.5102	16.7501	-0.549187	0.0148488
429	RPL12	MSTRG.19200	ENSG00000197958	1410.31	916.576	-0.621682	0.0148785
430	EIF3G	MSTRG.34257	ENSG00000130811	120.696	81.551	-0.565591	0.0151243
431	SNRPB	MSTRG.36471	ENSG00000125835	137.642	100.943	-0.447367	0.0151243
432	RPL7A	MSTRG.8064	ENSG00000148303	36.3101	21.1054	-0.782729	0.015265
433	FTH1	MSTRG.22190	ENSG00000167996	3559.71	2549.93	-0.481306	0.0153524
434	GMDS	MSTRG.12545	ENSG00000112699	0.629624	0.328923	-0.934654	0.0153818
435	RPL15	MSTRG.12691	ENSG00000174748	37.4264	19.8251	-0.916692	0.0157541
436	MRPL17	MSTRG.21566	ENSG00000158042	26.4943	17.7027	-0.581686	0.0158437
437	WDR77	MSTRG.1991	ENSG00000116455	19.3997	13.4692	-0.526339	0.0159903
438	TRBV12-4	MSTRG.40891	ENSG00000276953	0.782651	0.0373425	-4.3532	0.0161841
439	STXBP2	MSTRG.34116	ENSG00000076944	13.9503	7.64468	-0.867679	0.0163035
440	SYNJ2	MSTRG.14099	ENSG00000078269	0.493006	0.0159259	-4.86722	0.0169004
441	PCYT2	MSTRG.32892	ENSG00000185813	17.2364	11.2785	-0.611843	0.0170317
442	CSF2	MSTRG.11715	ENSG00000164400	1.90858	0.0750781	-4.64963	0.0171991
443	TAGLN	MSTRG.23299	ENSG00000149591	387.889	200.031	-0.955413	0.017505
444	RPL37	MSTRG.10878	ENSG00000145592	3.84989	0.459397	-3.06424	0.0175179
445	PGAP6	MSTRG.29058	ENSG00000129925	30.3529	22.186	-0.452168	0.0175991
446	MTFP1	MSTRG.38382	ENSG00000242114	6.21937	2.10293	-1.56391	0.0178035
447	VAT1L	MSTRG.30454	ENSG00000171724	2.2463	0	-11.134	0.0178354
448	ABHD11	MSTRG.15151	ENSG00000106077	4.20812	2.57059	-0.710858	0.0179712
449	VARS1	gene-VARS1-2	ENSG00000204394	3.82618	1.28897	-1.56894	0.0180578
450	ARPC3	MSTRG.25134	ENSG00000111229	213.061	157.022	-0.440299	0.0182396
451	PLEKHJ1	MSTRG.33783	ENSG00000104886	26.7688	18.8709	-0.504361	0.0182703
452	WHR1	MSTRG.40589	ENSG00000204344	1.62595	0.444466	-1.86878	0.018271
453	PLAC9	MSTRG.20582	ENSG00000189129	29.2044	11.7831	-1.3094	0.0183259
454	NOSIP	MSTRG.35913	ENSG00000142546	9.73074	4.90815	-0.987222	0.0186694
455	RHOT2	MSTRG.29087	ENSG00000140983	21.802	9.37122	-1.21807	0.0189023
456	SLC35B2	MSTRG.13224	ENSG00000157593	41.3242	30.7832	-0.42483	0.0192324
457	COMMD7	MSTRG.36821	ENSG00000149600	25.1781	18.9056	-0.413337	0.0192324
458	PCMT1	MSTRG.14008	ENSG00000120265	20.3337	11.5159	-0.820184	0.0192442
459	HOXB2	MSTRG.32151	ENSG00000173917	0.994248	0	-9.95891	0.0193638
460	WDR18	MSTRG.33671	ENSG00000065268	15.9889	9.7725	-0.710211	0.0194084
461	LSM2	gene-LSM2	ENSG00000204392	6.39762	3.55344	-0.848141	0.0198248
462	LSM3	MSTRG.6954	ENSG00000170860	7.8298	4.13253	-0.921786	0.0198968
463	WDR46	MSTRG.40608	ENSG00000227057	4.69904	1.98882	-1.24003	0.0199525
464	TSPAN5	MSTRG.9892	ENSG00000168785	40.6131	27.4749	-0.563812	0.0199727
465	AP2M1	MSTRG.8719	ENSG00000161203	246.023	159.843	-0.62213	0.0202548
466	JUND	MSTRG.34722	ENSG00000130522	32.1826	22.3689	-0.524767	0.0213731
467	PGF	MSTRG.27133	ENSG00000119630	11.7912	5.21115	-1.17788	0.0215679
468	SNRPA	MSTRG.35351	ENSG00000077312	55.8619	38.8539	-0.523795	0.0218489
469	URGCP	MSTRG.14838	ENSG00000106608	22.7586	19.5108	-0.222132	0.0223099
470	HOXD12	MSTRG.5894	ENSG00000170178	1.68772	0.0376076	-5.4509	0.0223924
471	MAD2L2	MSTRG.337	ENSG00000116670	37.5451	24.003	-0.64539	0.0224435
472	SFRP2	MSTRG.10369	ENSG00000145423	10.6519	2.55872	-2.05718	0.0224532
473	CORO7	MSTRG.29360	ENSG00000262246	1.39293	0.625468	-1.15385	0.0228081
474	ENTPD6	MSTRG.36711	ENSG00000197586	9.32389	4.9674	-0.908304	0.0228599
475	MCRIP1	gene-MCRIP1	ENSG00000225663	56.6426	26.0099	-1.1228	0.0232028
476	PXN	MSTRG.25293	ENSG00000089159	36.9684	26.801	-0.463987	0.0233888
477	ACTG1	MSTRG.11288	ENSG00000184009	3.4184	1.12189	-1.60653	0.0235136
478	ACTB		ENSG00000075624
479	HNRNPA1	MSTRG.17171	ENSG00000135486	6.20583	2.14671	-1.53106	0.0235467
480	MANF	MSTRG.7552	ENSG00000145050	87.8392	54.5778	-0.68654	0.0238824
481	SPOCD1	MSTRG.801	ENSG00000134668	5.3935	2.17278	-1.31128	0.0239047
482	AKT1S1	MSTRG.35950	ENSG00000204673	35.0948	23.1638	-0.59936	0.0240393
483	DAZAP1	MSTRG.33731	ENSG00000071626	6.92844	4.97072	-0.478994	0.0242183
484	EPHB6	MSTRG.16169	ENSG00000106123	2.44928	0.777143	-1.65484	0.0242485
485	PXDN	MSTRG.3987	ENSG00000130508	61.396	33.1814	-0.88775	0.0255218
486	PRRC2A	MSTRG.40536	ENSG00000204469	3.98128	1.15835	-1.78028	0.0256453
487	LYPLA2	MSTRG.583	ENSG00000011009	49.1969	38.0866	-0.369276	0.0256551
488	BEND6	MSTRG.13323	ENSG00000151917	0.889935	0.116662	-2.92067	0.0265914
489	RAF1	MSTRG.6929	ENSG00000132155	15.6759	9.74301	-0.686057	0.0266206
490	PA2G4	MSTRG.24486	ENSG00000170515	61.1087	47.6111	-0.360072	0.0266509
491	EDF1	MSTRG.19584	ENSG00000107223	176.507	97.706	-0.853203	0.0268484
492	MYL6	MSTRG.24501	ENSG00000092841	6.62821	1.86043	-1.83242	0.0268484
493	TSR3	MSTRG.29150	ENSG00000007520	76.9849	49.7994	-0.628437	0.0269046
494	KISS1	MSTRG.3331	ENSG00000170498	7.0971	3.19531	-1.15103	0.0269082
495	BRMS1	MSTRG.22525	ENSG00000174744	36.33	22.3129	-0.703258	0.0270475
496	COL5A3	MSTRG.34247	ENSG00000080573	31.7472	13.8531	-1.19636	0.0271762
497	PSCA	MSTRG.17657	ENSG00000167653	1.85465	0.166439	-3.47022	0.0285405
498	LINC00596	MSTRG.16014	ENSG00000259334	4.05165	1.89534	-1.09565	0.028668
499	PIN1	MSTRG.34243	ENSG00000127445	58.4294	39.389	-0.56889	0.0289003
500	JUP	MSTRG.31779	ENSG00000173801	1.19613	0.0339464	-5.09829	0.0290325
501	PABPN1	MSTRG.26443	ENSG00000100836	17.4797	17.3877	-0.00761084	0.0291403
502	IMPDH2	MSTRG.7441	ENSG00000178035	91.1876	63.1238	-0.530647	0.029156
503	SLIRP	MSTRG.27206	ENSG00000119705	71.3704	48.9295	-0.544611	0.0291959
504	FARSA	MSTRG.34484	ENSG00000179115	37.3693	29.101	-0.360773	0.0292642
505	CHMP2A	MSTRG.36405	ENSG00000130724	58.4144	41.2785	-0.500922	0.0299917
506	COMMD1	MSTRG.4723	ENSG00000173163	4.007	2.7579	-0.538789	0.0301073
507	EEF2	MSTRG.33921	ENSG00000167658	633.073	484.053	-0.387205	0.0302379
508	FAH	MSTRG.28660	ENSG00000103876	18.6685	11.503	-0.698547	0.0302581
509	EEF1B2	MSTRG.16010	ENSG00000114942	36.8686	24.023	-0.617957	0.0303834
510	NDUFB7	MSTRG.34559	ENSG00000099795	1.32435	0.0541443	-4.58702	0.0312114
511	ANP32A	MSTRG.28381	ENSG00000140350	20.1875	14.0344	-0.524467	0.0312536
512	TIMM8B	MSTRG.23232	ENSG00000150779	25.6885	15.6701	-0.713072	0.0313489
513	DUSP5	MSTRG.21048	ENSG00000138166	36.3558	24.4575	-0.571885	0.0314447
514	RPS3A	MSTRG.27901	ENSG00000145425	6.79	3.90361	-0.798445	0.0318244
515	RABEP2	MSTRG.29720	ENSG00000177548	10.3088	5.15712	-0.999096	0.0318615
516	IL17RE	MSTRG.6866	ENSG00000163701	1.15586	0	-10.176	0.0319121
517	PCCB	MSTRG.8287	ENSG00000114054	12.2147	7.93116	-0.62295	0.0319121
518	RING1	MSTRG.40413	ENSG00000204227	3.25538	1.38773	-1.2295	0.0319122
519	RPLP1	MSTRG.28394	ENSG00000137818	847.959	641.871	-0.401711	0.0321523
520	IFI27L2	MSTRG.27292	ENSG00000119632	89.4298	52.0505	-0.780832	0.0328136
521	YARS1	MSTRG.855	ENSG00000134684	63.7105	49.8331	-0.35442	0.0329575
522	FLOT1	gene-FLOT1-2	ENSG00000137312	12.9234	5.64642	-1.19443	0.033321
523	RBM42	MSTRG.35068	ENSG00000126254	46.3884	34.7754	-0.415685	0.0336094
524	POLDIP2	MSTRG.31392	ENSG00000004142	56.0846	44.8239	-0.32333	0.0336769
525	LY6K	MSTRG.17661	ENSG00000160886	6.93165	3.56265	-0.960051	0.0336851
526	CDC34	MSTRG.33615	ENSG00000099804	33.8325	24.0306	-0.493517	0.0340611
527	P3H4	MSTRG.31780	ENSG00000141696	16.5833	10.0905	-0.716675	0.0340629
528	ISOC2	MSTRG.36160	ENSG00000063241	61.381	43.4917	-0.497041	0.0342479
529	RTEL1	MSTRG.37415	ENSG00000258366	2.90631	1.32094	-1.13703	0.0343545
530	RPP21	gene-RPP21-3	ENSG00000241370	1.89703	0.678062	-1.48289	0.0343545
531	CNPY3	MSTRG.13136	ENSG00000137161	5.70229	3.85009	-0.566527	0.0344935
532	LGALS3	MSTRG.26781	ENSG00000131981	147.888	115.697	-0.354147	0.0346248
533	GTF2H5	MSTRG.14103	ENSG00000272047	5.02969	2.71496	-0.889294	0.0348342
534	MDH2	MSTRG.15256	ENSG00000146701	84.2816	67.4002	-0.322461	0.0348978
535	TMEM44	MSTRG.8838	ENSG00000145014	2.69069	1.45927	-0.882277	0.035036
536	METTL26	MSTRG.29081	ENSG00000130731	25.8706	16.8509	-0.61846	0.035143
537	DHRS4-AS1	MSTRG.12857	ENSG00000215256	1.75633	0.467265	-1.90799	0.0353431
538	RPS23	MSTRG.11361	ENSG00000186468	98.0589	62.302	-0.654361	0.0355586
539	FAAP20	MSTRG.160	ENSG00000162585	10.507	6.58184	-0.674708	0.0355865
540	MRPL54	MSTRG.33897	ENSG00000183617	40.0425	23.9157	-0.743549	0.0355865
541	MRPL21	MSTRG.22674	ENSG00000197345	12.4956	7.88856	-0.663522	0.0362377
542	RALA	MSTRG.14790	ENSG00000006451	1.48802	1.0585	-0.490977	0.0366424
543	MRPL24	MSTRG.2721	ENSG00000143314	55.6003	45.5847	-0.286538	0.0370312
544	SPATC1L	MSTRG.41090	ENSG00000160284	3.11316	1.4878	-1.0647	0.0373992
545	DAXX	MSTRG.12951	ENSG00000204209	4.56001	2.80354	-0.701586	0.0379854
546	ATAD3B	MSTRG.113	ENSG00000160072	5.59785	3.30522	-0.759947	0.0381111
547	TOMM7	MSTRG.14521	ENSG00000196683	532.077	365.166	-0.54308	0.0382189
548	MCM7	MSTRG.15538	ENSG00000166508	33.4777	21.3551	-0.648594	0.03845
549	ELOB	MSTRG.29284	ENSG00000103363	1.78647	0.213187	-3.06098	0.038591
550	CORO1B	MSTRG.22619	ENSG00000172725	20.6998	15.4179	-0.424987	0.0386552
551	U2AF2	MSTRG.36183	ENSG00000063244	38.6246	28.6097	-0.433001	0.0386583
552	CARD19	MSTRG.18650	ENSG00000165233	10.2203	7.94411	-0.363439	0.039002
553	KRT18	MSTRG.24358	ENSG00000111057	15.1549	8.557	-0.824539	0.0390663
554	EPN1	MSTRG.36185	ENSG00000063245	11.6145	8.08744	-0.522116	0.0394297
555	MYBL2	MSTRG.37062	ENSG00000101057	13.3881	1.34768	-3.31144	0.0398711
556	CNIH3	MSTRG.3581	ENSG00000143786	1.8238	0.165594	-3.45333	0.0399895
557	PSMD13	MSTRG.21338	ENSG00000185627	70.1357	45.8427	-0.613446	0.0407125
558	TPI1	MSTRG.23722	ENSG00000111669	323.235	260.586	-0.310827	0.0411559
559	TCF21	MSTRG.13854	ENSG00000118526	0.65867	0.130591	-2.32568	0.0412959
560	EZR	MSTRG.14114	ENSG00000092820	16.9844	8.24591	-1.04237	0.0413079
561	TIMM50	MSTRG.35301	ENSG00000105197	11.584	7.93211	-0.546304	0.0413387
562	SNRPF	MSTRG.24900	ENSG00000139343	75.3822	54.6489	-0.464025	0.0414524
563	SERPINF1	MSTRG.30801	ENSG00000132386	59.1537	29.1147	-1.0227	0.042226
564	TCF25	MSTRG.30734	ENSG00000141002	49.3251	34.5152	-0.515076	0.0423253
565	GTPBP6	gene-GTPBP6-2	ENSG00000178605	8.67121	4.0761	-1.08886	0.0423352
566	DEXI	MSTRG.29434	ENSG00000182108	36.1551	28.9673	-0.319763	0.0429057
567	FAM20C	MSTRG.14226	ENSG00000177706	1.47851	0.174954	-3.07185	0.0429213
568	HMG20B	MSTRG.33879	ENSG00000064961	27.8265	19.1016	-0.54274	0.0429213
569	EXOSC7	MSTRG.7292	ENSG00000075914	17.3798	10.7505	-0.692959	0.0429885
570	SLC20A1	MSTRG.5380	ENSG00000144136	96.6688	64.3633	-0.586804	0.0436877
571	CPA4	MSTRG.15964	ENSG00000128510	6.90318	0.411717	-4.06425	0.0440614
572	CENPB	MSTRG.36533	ENSG00000125817	42.2822	31.6311	-0.418693	0.0442228
573	TOR2A	MSTRG.19244	ENSG00000160404	4.75274	3.17525	-0.581738	0.044464
574	HNRNPM	MSTRG.34162	ENSG00000099783	55.776	45.4859	-0.294218	0.0449888
575	PTOV1	MSTRG.35944	ENSG00000104960	16.3632	11.524	-0.505776	0.0453392
576	EMC3	MSTRG.6880	ENSG00000125037	15.795	11.6441	-0.439838	0.0455718
577	CYBA	MSTRG.30652	ENSG00000051523	44.774	25.7753	-0.796648	0.0459664
578	SLC49A3	MSTRG.8995	ENSG00000169026	13.2609	8.91605	-0.572653	0.0480424
579	CASS4	MSTRG.37263	ENSG00000087589	1.68076	0.119153	-3.80703	0.0481756
580	NDUFAF2	MSTRG.11050	ENSG00000164182	19.8277	13.8978	-0.512636	0.0484232
581	TARBP2	MSTRG.24396	ENSG00000139546	4.73349	2.9937	-0.660797	0.0484977
582	RPS27	MSTRG.23289	ENSG00000143947	20.1181	13.6951	-0.554799	0.0489189
583	FAM234A	MSTRG.29050	ENSG00000167930	17.9081	12.2809	-0.544161	0.0492125
584	HIC1	MSTRG.30814	ENSG00000177374	6.89707	4.02105	-0.778261	0.0492532
585	SMTNL1	MSTRG.22056	ENSG00000214872	3.51908	3.63796	0.0479163	0.0495035
586	MAP3K11	MSTRG.22435	ENSG00000173327	14.6727	9.21182	-0.671521	0.0495203
587	AKR7A2	MSTRG.460	ENSG00000053371	22.0906	17.1998	-0.361026	0.0495203
588	OGFOD2	MSTRG.25400	ENSG00000111325	13.4249	8.00236	-0.746338	0.0496892
