# Supplementary material
Source: publisher site journal article supplement (doi:10.18632/aging.206371)
Supplement: Supplementary file 2 [file aging-v18i1-206371-supplementary-material-SD4.xlsx]

## Sheet: YvsM(M↑)
	Supplementary Table 4. DEGs in NHDFs (padj < 0.05).
	Gene name	Ensembl ID	baseMean	log2FC	padj
1	TMEM176A	ENSG00000002933	3061.24	5.75201	2.04e-75
2	WNT2	ENSG00000105989	214.105	3.19425	3.19e-58
3	SYPL2	ENSG00000143028	528.321	2.71836	2.52e-57
4	ELN	ENSG00000049540	937.288	4.11969	1.32e-52
5	TMEM176B	ENSG00000106565	4191.83	4.82347	1.08e-48
6	HOXC12	ENSG00000123407	60.7066	3.67748	1.08e-48
7	IGFBP3	ENSG00000146674	2719.27	2.51106	4.15e-48
8	GJA5	ENSG00000265107	124.71	2.61601	7.48e-44
9	ITIH5	ENSG00000123243	579.577	2.73046	4.97e-40
10	PLXDC2	ENSG00000120594	302.956	2.66491	3.73e-38
11	C3	ENSG00000125730	182.623	2.08944	5.54e-38
12	SLC12A7	ENSG00000113504	218.437	1.81539	5.06e-36
13	SULF1	ENSG00000137573	301.062	3.93985	5.72e-35
14	HSD17B2	ENSG00000086696	827.769	2.35915	4.41e-34
15	FAM20A	ENSG00000108950	329.235	1.90554	1.02e-33
16	IGFBP5	ENSG00000115461	14883.2	2.94963	2.21e-33
17	CCND2	ENSG00000118971	5114.04	2.64381	3.26e-33
18	GRIA1	ENSG00000155511	466.811	1.49049	3.69e-32
19	C1S	ENSG00000182326	3713.54	1.6185	7.45e-30
20	SLITRK1	ENSG00000178235	153.322	5.27885	5.94e-29
21	VNN1	ENSG00000112299	96.4454	2.67346	4.52e-28
22	ADH1B	ENSG00000196616	51.568	3.81891	3.82e-26
23	TRO	ENSG00000067445	372.678	1.53241	2.53e-25
24	FMOD	ENSG00000122176	898.259	1.58944	9.69e-25
25	TXNIP	ENSG00000265972	5544.63	1.46304	4.72e-23
26	MAN1C1	ENSG00000117643	116.611	2.81561	1.35e-22
27	DCN	ENSG00000011465	8899.47	1.47208	1.95e-22
28	ARMC9	ENSG00000135931	1412.29	0.933075	1.95e-22
29	PIK3IP1	ENSG00000100100	435.362	1.39055	2.93e-22
30	SPOCK1	ENSG00000152377	953.934	2.10073	5.72e-22
31	SH3BGRL2	ENSG00000198478	106.627	2.07456	9.23e-22
32	ALPL	ENSG00000162551	1077.84	2.48148	1.37e-21
33	JAM2	ENSG00000154721	97.1722	2.67996	1.52e-21
34	FAP	ENSG00000078098	761.597	1.86029	2.23e-21
35	GABBR2	ENSG00000136928	189.265	3.328	2.54e-21
36	ID3	ENSG00000117318	443.739	2.24037	3.4e-20
37	CHRNA1	ENSG00000138435	41.2911	2.14974	4.13e-20
38	MIAT	ENSG00000225783	550.224	1.35679	1.12e-19
39	ST8SIA1	ENSG00000111728	79.895	2.31745	1.55e-19
40	GABRE	ENSG00000102287	221.756	1.75669	2.13e-19
41	WNT2B	ENSG00000134245	635.637	2.26256	4.78e-19
42	RCAN2	ENSG00000172348	275.758	1.81537	5.92e-19
43	SCUBE2	ENSG00000175356	493.63	1.42821	9.58e-19
44	LCNL1	ENSG00000214402	68.5297	4.81688	9.83e-19
45	TMEM130	ENSG00000166448	106.681	1.82962	1.36e-18
46	FZD4	ENSG00000174804	124.946	1.62972	8.03e-18
47	PTGDS	ENSG00000107317	420.536	4.07812	1.07e-17
48	TPP1	ENSG00000166340	3783.71	0.965449	7.17e-17
49	SEMA6A	ENSG00000092421	226.866	1.19547	1.22e-16
50	OSR2	ENSG00000164920	933.703	1.13505	1.75e-16
51	RIPOR3	ENSG00000042062	94.0755	1.87513	1.76e-16
52	C1orf198	ENSG00000119280	2524.45	0.867647	8.07e-16
53	FBXO32	ENSG00000156804	86.0841	1.69503	8.34e-16
54	CCL7	ENSG00000108688	81.9944	2.11599	1.23e-15
55	LDOC1	ENSG00000182195	742.91	1.90056	1.37e-15
56	MGP	ENSG00000111341	88.5729	2.55871	2e-15
57	C1R	ENSG00000159403	3115.58	1.64691	2.48e-15
58	MSC	ENSG00000178860	231.356	1.73375	3.89e-15
59	FAXDC2	ENSG00000170271	179.823	1.50245	8.59e-15
60	OLFM2	ENSG00000105088	303.82	1.97137	1.13e-14
61	FBLN2	ENSG00000163520	5347.58	0.867182	1.13e-14
62	BAALC	ENSG00000164929	41.2993	2.11543	1.25e-14
63	SLIT3	ENSG00000184347	535.995	1.90032	1.69e-14
64	APOL1	ENSG00000100342	44.6094	2.0127	1.87e-14
65	ABCB1	ENSG00000085563	69.5487	3.70283	2.92e-14
66	SLC40A1	ENSG00000138449	88.3133	3.09603	3.31e-14
67	COL15A1	ENSG00000204291	843.258	2.21726	5.83e-14
68	OAS2	ENSG00000111335	741.805	1.99609	7.87e-14
69	TMEM140	ENSG00000146859	221.056	1.19566	1.11e-13
70	IL16	ENSG00000172349	62.7208	2.18307	1.74e-13
71	AKR1C3	ENSG00000196139	20.8254	3.03359	3.2e-13
72	PURPL	ENSG00000250337	187.053	3.41709	3.58e-13
73	COL14A1	ENSG00000187955	843.392	1.86375	5.46e-13
74	MSC-AS1	ENSG00000235531	83.4799	1.81487	6.12e-13
75	FAM43A	ENSG00000185112	605.084	0.861474	7.55e-13
76	EFNB1	ENSG00000090776	891.855	0.934659	8.82e-13
77	MANBA	ENSG00000109323	560.878	0.821886	9.11e-13
78	LINC00839	ENSG00000185904	235.874	0.890885	9.23e-13
79	CCDC9B	ENSG00000188549	685.597	0.8963	1.04e-12
80	CIMAP3	ENSG00000173947	38.8179	2.42873	1.69e-12
81	CD4	ENSG00000010610	25.2559	2.06935	3.33e-12
82	TENT5C	ENSG00000183508	342.312	1.35511	3.61e-12
83	CORIN	ENSG00000145244	2134.21	1.49107	3.72e-12
84	C1RL	ENSG00000139178	445.64	1.19318	4.65e-12
85	FBLN7	ENSG00000144152	483.937	1.05239	5.15e-12
86	OLFML2A	ENSG00000185585	1098.28	1.2498	7.73e-12
87	SLC46A3	ENSG00000139508	92.5638	1.56475	8.49e-12
88	F2RL2	ENSG00000164220	668.566	1.73377	1.8e-11
89	KCNJ6	ENSG00000157542	237.447	1.70137	2.91e-11
90	AKR1C2	ENSG00000151632	77.9082	2.12467	2.97e-11
91	PIK3R3	ENSG00000117461	627.689	0.995732	3.08e-11
92	SERPING1	ENSG00000149131	1449.31	1.42462	3.08e-11
93	HTR2B	ENSG00000135914	22.4271	2.97783	3.17e-11
94	SLC12A8	ENSG00000221955	101.914	1.50474	3.89e-11
95	SCN2A	ENSG00000136531	118.115	3.02072	4.84e-11
96	PPL	ENSG00000118898	101.094	1.64251	8.44e-11
97	INHBB	ENSG00000163083	277.606	1.24564	1.62e-10
98	NPTX1	ENSG00000171246	2254.23	1.70507	2.14e-10
99	MX2	ENSG00000183486	508.008	2.3226	3.21e-10
100	―	ENSG00000246090	136.92	1.27559	4e-10
101	CYP7B1	ENSG00000172817	86.9304	2.63416	4.21e-10
102	ITGA11	ENSG00000137809	593.156	1.14958	6e-10
103	―	ENSG00000287673	22.815	2.40552	6.24e-10
104	SYNPO2	ENSG00000172403	412.546	1.69567	6.48e-10
105	TMEM178B	ENSG00000261115	64.4312	3.29086	7.01e-10
106	FGF7	ENSG00000140285	22.1232	3.66223	1.04e-09
107	CLSTN3	ENSG00000139182	611.993	0.888484	1.32e-09
108	CCL2	ENSG00000108691	1931.76	1.04845	1.54e-09
109	TRPA1	ENSG00000104321	3622.42	1.32276	1.78e-09
110	―	ENSG00000259807	97.5088	1.58385	1.8e-09
111	SEPTIN6	ENSG00000125354	188.375	0.950525	2.03e-09
112	YPEL4	ENSG00000166793	22.891	2.13546	2.3e-09
113	SYT11	ENSG00000132718	650.95	0.817384	2.5e-09
114	GBP2	ENSG00000162645	70.3376	1.66824	2.54e-09
115	PCDHB14	ENSG00000120327	25.1661	2.76151	2.55e-09
116	ADAMTS10	ENSG00000142303	149.525	1.39169	2.55e-09
117	HOXB13	ENSG00000159184	33.7385	3.20562	2.62e-09
118	PDE1A	ENSG00000115252	109.432	1.75049	2.93e-09
119	BEST1	ENSG00000167995	87.4592	1.07152	3.04e-09
120	LRRN4CL	ENSG00000177363	496.785	0.837211	3.22e-09
121	CFH	ENSG00000000971	945.031	1.0762	3.67e-09
122	NMRAL2P	ENSG00000290862	152.977	0.886591	3.93e-09
123	MKX	ENSG00000150051	110.796	2.36996	4.16e-09
124	GALNT5	ENSG00000136542	1925.39	1.5337	4.6e-09
125	VWA5A	ENSG00000110002	86.1197	1.71481	4.74e-09
126	NALF1	ENSG00000204442	454.229	1.41063	5.74e-09
127	P4HA3	ENSG00000149380	249.951	1.05565	6.53e-09
128	GPR37	ENSG00000170775	76.0854	3.51926	7.01e-09
129	SLC44A2	ENSG00000129353	4730.67	0.850991	8.67e-09
130	MAP6	ENSG00000171533	148.422	1.17441	9.29e-09
131	SNCA	ENSG00000145335	270.132	1.10943	1.07e-08
132	RIPOR2	ENSG00000111913	29.8749	1.62826	1.12e-08
133	―	ENSG00000302923	36.8632	2.01092	1.17e-08
134	CRACD	ENSG00000109265	84.1837	2.55008	1.17e-08
135	SOD2	ENSG00000291237	2069.88	1.38983	1.33e-08
136	CRYAB	ENSG00000109846	1046.15	1.31358	1.37e-08
137	TP53INP1	ENSG00000164938	481.298	1.29353	1.39e-08
138	GLDN	ENSG00000186417	12.7321	2.87089	1.49e-08
139	C10orf105	ENSG00000214688	97.4815	1.18231	1.86e-08
140	VAMP8	ENSG00000118640	30.5311	2.29522	2.01e-08
141	CD14	ENSG00000170458	12.4544	3.25772	2.03e-08
142	LCE2A	ENSG00000187173	530.584	2.25551	2.56e-08
143	CXCL16	ENSG00000161921	70.0004	1.34256	2.67e-08
144	FAM110B	ENSG00000169122	26.5902	2.18101	2.86e-08
145	RUNDC3B	ENSG00000105784	15.4454	4.00802	2.91e-08
146	MAFIP	ENSG00000274847	62.9191	2.31522	2.92e-08
147	PARD6G	ENSG00000178184	138.445	1.34544	2.93e-08
148	SLCO3A1	ENSG00000176463	283.621	0.738039	3.05e-08
149	SLC44A3	ENSG00000143036	33.5523	1.99286	3.15e-08
150	TSPAN10	ENSG00000182612	116.89	1.55124	3.99e-08
151	DRAM1	ENSG00000136048	2646.89	0.630416	4.05e-08
152	GABARAPL1	ENSG00000139112	1764.46	0.684837	4.26e-08
153	ANGPTL2	ENSG00000136859	893.691	0.857815	4.47e-08
154	SLC1A1	ENSG00000106688	228.882	1.94862	5.56e-08
155	ACTR3B	ENSG00000133627	123.116	0.853224	5.88e-08
156	DIRAS2	ENSG00000165023	84.5591	2.50443	6.49e-08
157	SEMA5A	ENSG00000112902	2102.75	1.12139	7.57e-08
158	ARL4C	ENSG00000188042	259.557	0.883384	7.57e-08
159	PCDHB7	ENSG00000113212	16.5914	2.26471	8.64e-08
160	CTSK	ENSG00000143387	6066.07	0.650083	1.03e-07
161	KLF8	ENSG00000102349	127.239	1.23676	1.12e-07
162	GL000214.1	ENSG00000303173	44.957	2.54667	1.15e-07
163	COMP	ENSG00000105664	123.11	4.57947	1.21e-07
164	CSF1	ENSG00000184371	1839.89	0.72403	1.36e-07
165	BHLHE41	ENSG00000123095	97.7405	1.69769	2.01e-07
166	PPFIA4	ENSG00000143847	115.932	1.21786	2.3e-07
167	PCDHB2	ENSG00000112852	26.682	2.52194	2.35e-07
168	PLAT	ENSG00000104368	2981.39	0.842669	2.46e-07
169	TCTN1	ENSG00000204852	743.81	0.66894	2.76e-07
170	SLC52A1	ENSG00000132517	70.3302	1.9152	2.89e-07
171	ABCA1	ENSG00000165029	296.471	2.28163	2.99e-07
172	ATXN7L2	ENSG00000162650	226.346	1.05312	3.03e-07
173	APBB1IP	ENSG00000077420	103.33	1.55808	3.14e-07
174	EFEMP1	ENSG00000115380	1684.26	1.25776	3.65e-07
175	OLR1	ENSG00000173391	80.1584	1.47686	3.67e-07
176	EMB	ENSG00000170571	129.432	4.42564	3.72e-07
177	C11orf87	ENSG00000185742	44.1782	2.72958	4.02e-07
178	IL4I1	ENSG00000104951	55.3606	1.62575	4.26e-07
179	EPHB3	ENSG00000182580	90.8614	1.25108	4.31e-07
180	KIF26B	ENSG00000162849	284.009	1.42791	4.85e-07
181	AGA	ENSG00000038002	469.141	0.928424	4.89e-07
182	PLAAT3	ENSG00000176485	24.5495	2.12687	4.93e-07
183	SPTBN4	ENSG00000160460	57.9666	1.27845	5.29e-07
184	EMID1	ENSG00000186998	24.0019	2.17181	5.54e-07
185	SLC38A11	ENSG00000169507	155.336	1.55831	5.59e-07
186	TLR3	ENSG00000164342	120.034	2.33644	5.79e-07
187	MAPT	ENSG00000186868	61.6597	1.44301	8.25e-07
188	BTBD19	ENSG00000222009	455.684	0.755405	8.52e-07
189	PAMR1	ENSG00000149090	1872.75	0.649325	9.07e-07
190	CCDC102B	ENSG00000150636	274.742	1.28434	9.25e-07
191	PCDHB13	ENSG00000187372	17.6769	2.8332	9.42e-07
192	PARP8	ENSG00000151883	89.0629	1.64398	1.02e-06
193	MX1	ENSG00000157601	3684.27	1.10002	1.05e-06
194	EREG	ENSG00000124882	121.899	2.37943	1.09e-06
195	KIAA0408	ENSG00000189367	39.8241	1.6386	1.14e-06
196	ADCY4	ENSG00000129467	334.639	0.961912	1.15e-06
197	ADAM19	ENSG00000135074	391.102	0.95196	1.17e-06
198	PPM1H	ENSG00000111110	40.0055	2.10267	1.21e-06
199	IRAG1	ENSG00000072952	622.955	0.654848	1.28e-06
200	TMEM35A	ENSG00000126950	322.179	1.19037	1.28e-06
201	MANEAL	ENSG00000185090	65.8337	1.14638	1.5e-06
202	FSTL5	ENSG00000168843	25.787	3.19718	1.63e-06
203	RDH10	ENSG00000121039	147.516	1.26168	1.67e-06
204	SLC9A9	ENSG00000181804	123.878	0.825964	1.73e-06
205	GRP	ENSG00000134443	159.783	1.49951	1.88e-06
206	NATD1	ENSG00000274180	213.234	0.873885	1.89e-06
207	SORT1	ENSG00000134243	727.747	0.867009	1.9e-06
208	LIMCH1	ENSG00000064042	222.598	1.69005	1.95e-06
209	BST2	ENSG00000130303	1591.73	2.82364	1.95e-06
210	ICAM5	ENSG00000105376	381.8	0.587158	2.07e-06
211	GPNMB	ENSG00000136235	3765.91	0.906527	2.17e-06
212	SCN9A	ENSG00000169432	164.947	1.58747	2.34e-06
213	KPRP	ENSG00000203786	1267.33	2.05244	2.35e-06
214	LINC00963	ENSG00000204054	295.664	0.970515	2.42e-06
215	EFHD1	ENSG00000115468	70.8618	1.43087	2.58e-06
216	COL8A2	ENSG00000171812	617.066	0.575187	2.73e-06
217	PDE4B	ENSG00000184588	98.1274	1.85197	2.99e-06
218	SOX6	ENSG00000110693	26.4045	2.62503	3.23e-06
219	ALDH3A2	ENSG00000072210	401.04	0.656086	3.29e-06
220	CALCOCO1	ENSG00000012822	1541.8	0.685967	3.39e-06
221	PLIN2	ENSG00000147872	1151.11	0.502839	3.92e-06
222	SATB1	ENSG00000182568	31.012	2.17881	4.07e-06
223	SYT1	ENSG00000067715	179.915	1.58213	4.28e-06
224	PRAC1	ENSG00000159182	8.3711	5.65437	4.39e-06
225	TRANK1	ENSG00000168016	492.063	0.918073	4.5e-06
226	MAP2K6	ENSG00000108984	95.7826	1.18217	4.58e-06
227	―	ENSG00000291089	81.1982	1.76558	4.99e-06
228	CYTL1	ENSG00000170891	71.5113	1.30662	5.02e-06
229	PCDHB15	ENSG00000113248	16.5037	2.23931	5.18e-06
230	―	ENSG00000261888	38.8373	1.39019	5.28e-06
231	SLITRK5	ENSG00000165300	54.8984	1.65161	5.34e-06
232	―	ENSG00000285748	19.4963	2.13767	5.35e-06
233	PLEKHA6	ENSG00000143850	505.986	0.764404	5.47e-06
234	SLC25A27	ENSG00000153291	70.875	1.33522	5.49e-06
235	OVCH1	ENSG00000187950	14.3664	2.84446	5.88e-06
236	TRPC6	ENSG00000137672	82.1308	1.36927	6.12e-06
237	ZSWIM5	ENSG00000162415	61.0049	1.47844	6.17e-06
238	FAM227A	ENSG00000184949	55.071	1.23345	6.73e-06
239	DEPP1	ENSG00000165507	19.3805	2.35323	7.31e-06
240	TMEM198B	ENSG00000293491	333.141	0.806674	7.72e-06
241	NAP1L3	ENSG00000186310	33.7482	2.40501	7.9e-06
242	CELSR3	ENSG00000008300	128.923	0.944362	7.94e-06
243	TEK	ENSG00000120156	59.3129	2.27567	7.94e-06
244	STAT2	ENSG00000170581	3190.14	0.722552	7.97e-06
245	UBA7	ENSG00000182179	299.99	0.956085	8.49e-06
246	KCNH2	ENSG00000055118	37.5998	1.33257	9.54e-06
247	ACACB	ENSG00000076555	88.8652	1.19121	1.03e-05
248	IFI44L	ENSG00000137959	440.929	4.56513	1.06e-05
249	NEDD4L	ENSG00000049759	460.04	0.594825	1.06e-05
250	LTBP2	ENSG00000119681	5228.9	0.804176	1.06e-05
251	ICAM1	ENSG00000090339	3183.01	0.496285	1.08e-05
252	BTN3A3	ENSG00000111801	352.22	0.814016	1.1e-05
253	CDKN1C	ENSG00000129757	64.6986	1.62528	1.11e-05
254	CD68	ENSG00000129226	1007.4	0.584257	1.16e-05
255	SLC22A17	ENSG00000092096	1147.54	1.0624	1.22e-05
256	LINC01621	ENSG00000235357	12.9521	2.38145	1.24e-05
257	PDCD4	ENSG00000150593	832.518	0.942887	1.25e-05
258	LRATD1	ENSG00000162981	1254.8	0.844322	1.25e-05
259	GARS1-DT	ENSG00000196295	227.482	0.557556	1.3e-05
260	GPRC5B	ENSG00000167191	53.9208	1.53261	1.31e-05
261	PRECSIT	ENSG00000255874	115.207	0.891694	1.36e-05
262	―	ENSG00000260077	97.7651	0.831357	1.41e-05
263	SMO	ENSG00000128602	199.045	0.951609	1.56e-05
264	EPB41L1	ENSG00000088367	405.126	0.637744	1.59e-05
265	GUSBP11	ENSG00000228315	390.657	0.554751	1.59e-05
266	HSPB8	ENSG00000152137	323.137	0.782821	1.61e-05
267	SIX2	ENSG00000170577	449.725	1.0216	1.61e-05
268	SULF2	ENSG00000196562	819.57	0.81448	1.62e-05
269	ARHGEF25	ENSG00000240771	531.42	0.585368	1.63e-05
270	FUCA1	ENSG00000179163	237.276	0.947141	1.68e-05
271	IGFBP7	ENSG00000163453	2797.38	0.706799	1.9e-05
272	CPE	ENSG00000109472	298.798	1.27912	1.93e-05
273	CAMK1D	ENSG00000183049	228.314	0.84282	2.09e-05
274	CDH6	ENSG00000113361	225.785	4.83625	2.18e-05
275	―	ENSG00000289697	82.8488	1.01601	2.25e-05
276	CPZ	ENSG00000109625	851.636	1.15853	2.28e-05
277	FMNL1-DT	ENSG00000267121	25.9297	1.44237	2.32e-05
278	CBX7	ENSG00000100307	256.411	0.651542	2.56e-05
279	ST6GALNAC5	ENSG00000117069	21.6806	3.08054	2.57e-05
280	PTGES	ENSG00000148344	222.888	1.00643	2.59e-05
281	GL000214.1	ENSG00000303221	56.1589	2.29198	2.6e-05
282	PRSS23	ENSG00000150687	5130.11	0.678311	2.66e-05
283	PCDHB16	ENSG00000272674	8.51062	3.50374	2.69e-05
284	CARD6	ENSG00000132357	47.7898	1.09972	2.79e-05
285	LRRC32	ENSG00000137507	50.3423	1.02585	2.79e-05
286	SORCS2	ENSG00000184985	20.1439	1.97448	2.87e-05
287	CD36	ENSG00000135218	113.209	1.7152	3.04e-05
288	WDR19	ENSG00000157796	375.099	0.847373	3.06e-05
289	ANK1	ENSG00000029534	328.112	0.716735	3.32e-05
290	IL12RB1	ENSG00000096996	30.9335	1.97564	3.32e-05
291	MFAP4	ENSG00000166482	3373.36	0.876852	3.32e-05
292	ADAM22	ENSG00000008277	35.2044	1.6497	3.54e-05
293	KCNC4	ENSG00000116396	500.989	0.837214	3.56e-05
294	RFTN2	ENSG00000162944	22.2952	1.82081	3.58e-05
295	P4HA2	ENSG00000072682	3400.08	0.61827	3.63e-05
296	ABCC5	ENSG00000114770	452.131	0.58743	3.73e-05
297	SLC1A2	ENSG00000110436	37.0433	1.3796	3.78e-05
298	MYO1D	ENSG00000176658	1294.42	0.686814	4.14e-05
299	CIMAP1B	ENSG00000177989	37.3589	2.29563	4.2e-05
300	GBA1	ENSG00000177628	2129.62	0.725129	4.52e-05
301	ZMIZ1-AS1	ENSG00000224596	24.6436	1.57499	4.55e-05
302	GLMP	ENSG00000198715	1525.08	0.921979	4.58e-05
303	RASL11A	ENSG00000122035	18.0821	1.6656	4.6e-05
304	CFAP70	ENSG00000156042	25.0306	1.38763	5.03e-05
305	BTD	ENSG00000169814	326.932	0.438885	5.2e-05
306	ST6GAL1	ENSG00000073849	91.9008	1.6547	5.29e-05
307	ACAD11	ENSG00000240303	823.018	0.473305	5.38e-05
308	SLC7A8	ENSG00000092068	300.209	0.773778	5.48e-05
309	RAB15	ENSG00000139998	154.191	0.679433	5.48e-05
310	C3orf80	ENSG00000180044	33.2279	3.62019	5.76e-05
311	GAS7	ENSG00000007237	196.634	0.931508	5.92e-05
312	ZCCHC24	ENSG00000165424	1533.31	0.546708	5.93e-05
313	―	ENSG00000291099	12.9556	2.07731	5.95e-05
314	SNAP25	ENSG00000132639	173.147	1.57413	6.09e-05
315	HSPB7	ENSG00000173641	304.289	0.973272	6.15e-05
316	RAB29	ENSG00000117280	335.538	0.77926	6.19e-05
317	PRAC2	ENSG00000229637	7.92339	3.36664	6.38e-05
318	BAZ2B	ENSG00000123636	139.981	0.862037	6.44e-05
319	LIPC	ENSG00000166035	35.8568	1.43402	6.44e-05
320	PBX1	ENSG00000185630	598.41	1.00857	6.91e-05
321	TRIM58	ENSG00000162722	12.1418	5.59849	6.92e-05
322	KNDC1	ENSG00000171798	66.5714	1.08917	7.06e-05
323	ADAMTS7	ENSG00000136378	309.258	0.781861	7.14e-05
324	ZC4H2	ENSG00000126970	125.382	0.744986	7.27e-05
325	STING1	ENSG00000184584	940.593	1.05076	7.27e-05
326	FMO4	ENSG00000076258	25.8132	1.37096	7.36e-05
327	OAS1	ENSG00000089127	788.392	5.81803	7.84e-05
328	IFI27	ENSG00000165949	589.779	1.9417	7.89e-05
329	TTLL3	ENSG00000214021	942.337	0.640763	7.99e-05
330	TCTN2	ENSG00000168778	263.585	0.571275	8.27e-05
331	PLA2R1	ENSG00000153246	322.797	1.18557	8.69e-05
332	RGN	ENSG00000130988	39.265	0.999801	8.96e-05
333	LGALS3BP	ENSG00000108679	3706.2	1.17044	9.06e-05
334	MASP1	ENSG00000127241	8003.53	0.438718	9.27e-05
335	AHSA2P	ENSG00000293434	758.926	0.480567	9.3e-05
336	SMAD7	ENSG00000101665	85.7803	0.993505	9.49e-05
337	GRIA3	ENSG00000125675	417.015	0.905093	9.88e-05
338	EGLN3	ENSG00000129521	12.0002	2.09219	0.000104507
339	ABCA8	ENSG00000141338	118.766	1.85153	0.00011282
340	NRP2	ENSG00000118257	117.573	1.02615	0.000122017
341	CBLN3	ENSG00000139899	316.814	0.806738	0.000126407
342	MMP10	ENSG00000166670	118.419	1.21969	0.000129329
343	PARP14	ENSG00000173193	933.231	0.534775	0.000130059
344	GNPDA1	ENSG00000113552	1111.17	0.65138	0.000134955
345	―	ENSG00000291094	37.0011	1.23684	0.000135326
346	IL17RB	ENSG00000056736	14.2926	1.66443	0.000141215
347	ZNF577	ENSG00000161551	117.7	0.609398	0.000143109
348	KCNQ3	ENSG00000184156	92.1131	1.36657	0.000143787
349	KCNJ5-AS1	ENSG00000174370	47.6141	1.19318	0.000147432
350	DAPK1	ENSG00000196730	72.2013	1.26502	0.000149216
351	AZIN2	ENSG00000142920	140.899	0.773675	0.000151187
352	CYP4V2	ENSG00000145476	253.131	0.812458	0.000159135
353	SCIN	ENSG00000006747	13.0473	2.52122	0.00016236
354	HOXD3	ENSG00000128652	100.952	0.826962	0.000162595
355	PROS1	ENSG00000184500	228.539	0.84387	0.000162595
356	SELENOP	ENSG00000250722	85.0192	1.40389	0.000165186
357	MAX	ENSG00000125952	740.272	0.362047	0.00016582
358	MYLIP	ENSG00000007944	187.182	0.834135	0.000167342
359	DNAAF11	ENSG00000129295	44.4236	1.02346	0.000168754
360	SYT12	ENSG00000173227	14.5139	2.60815	0.000169388
361	L3MBTL1	ENSG00000185513	138.127	0.646887	0.000169388
362	ADORA2A	ENSG00000128271	18.8015	1.57941	0.000174747
363	MMP24	ENSG00000125966	46.9429	1.01297	0.000178769
364	RIPK3	ENSG00000129465	140.708	0.659187	0.000185839
365	APLP2	ENSG00000084234	6377.02	0.713177	0.000190747
366	DLK1	ENSG00000185559	10.4125	2.21767	0.000192215
367	LIF	ENSG00000128342	539.783	0.705372	0.000197986
368	UBE2H	ENSG00000186591	1987.99	0.474526	0.000197986
369	ENPP5	ENSG00000112796	19.1604	2.51404	0.000200278
370	LINC01503	ENSG00000233901	48.9571	1.55932	0.00020373
371	MCTP1	ENSG00000175471	53.7286	1.3238	0.000205337
372	PRRT1	ENSG00000204314	77.0809	1.32721	0.000205337
373	GPR78	ENSG00000155269	14.3379	2.1	0.000208955
374	TFAP2A	ENSG00000137203	396.317	0.816874	0.000224415
375	ZNF862	ENSG00000106479	283.489	0.624434	0.000224701
376	NR2F1	ENSG00000175745	390.032	0.944632	0.000232043
377	RNF150	ENSG00000170153	75.021	1.16839	0.000233626
378	ALDH3A1	ENSG00000108602	377.479	1.27338	0.000245196
379	IFI44	ENSG00000137965	358.901	1.18584	0.000249277
380	PPARGC1A	ENSG00000109819	19.1046	3.19879	0.000255146
381	GCA	ENSG00000115271	27.6365	1.61439	0.000257325
382	ABCA6	ENSG00000154262	34.1385	1.4121	0.000258998
383	HDAC9	ENSG00000048052	120.07	1.47414	0.000266133
384	PLEKHH2	ENSG00000152527	209.866	1.21258	0.000266133
385	RGCC	ENSG00000102760	2774.24	0.608976	0.000267401
386	GAS1	ENSG00000180447	687.922	1.40599	0.000267401
387	ATP8B4	ENSG00000104043	7.74456	2.58543	0.000272829
388	―	ENSG00000272668	122.75	0.614105	0.000285045
389	NIPSNAP3B	ENSG00000165028	21.9907	1.27166	0.000294688
390	PRSS23-AS1	ENSG00000255471	8.05291	2.56889	0.000295652
391	ANTXR1	ENSG00000169604	2186.04	0.689486	0.000317245
392	NHLRC3	ENSG00000188811	229.067	0.982102	0.000319548
393	SLC27A6	ENSG00000113396	29.281	1.97834	0.0003202
394	LUM	ENSG00000139329	4587.4	1.29233	0.0003202
395	PDE1C	ENSG00000154678	306.234	0.969147	0.000324385
396	CYP39A1	ENSG00000146233	15.7901	1.83124	0.000326097
397	PTCHD4	ENSG00000244694	105.005	0.87605	0.000335495
398	AVIL	ENSG00000135407	44.1983	1.1952	0.000343674
399	VASH1	ENSG00000071246	222.907	0.671026	0.000348842
400	ABI3BP	ENSG00000154175	195.129	1.72258	0.000349414
401	PDE11A	ENSG00000128655	11.5411	2.93087	0.000350149
402	―	ENSG00000289470	19.3123	1.65637	0.000352643
403	CASTOR3P	ENSG00000291122	57.5085	0.784365	0.000354204
404	F11R	ENSG00000158769	98.6549	0.726455	0.000358861
405	KCNAB2	ENSG00000069424	331.2	0.769255	0.000376341
406	HOXA11	ENSG00000005073	554.73	0.601875	0.000378196
407	RIMS2	ENSG00000176406	10.8519	2.48185	0.000384956
408	PTPRQ	ENSG00000139304	17.524	2.03156	0.000389709
409	CPQ	ENSG00000104324	842.824	0.551681	0.000398801
410	CLCNKB	ENSG00000184908	14.3107	2.56323	0.000403852
411	PLTP	ENSG00000100979	2091.89	0.879767	0.000408154
412	TMEM26	ENSG00000196932	41.4624	1.25377	0.000415467
413	KATNAL2	ENSG00000167216	99.3563	0.769396	0.000421186
414	―	ENSG00000272970	11.8239	1.81434	0.000424483
415	COQ8A	ENSG00000163050	102.804	0.828302	0.000435464
416	STARD5	ENSG00000172345	167.861	0.795201	0.000444683
417	ZNF224	ENSG00000267680	166.516	0.895416	0.000462002
418	ATP9A	ENSG00000054793	648.192	0.985006	0.000467554
419	TMEM86A	ENSG00000151117	30.148	1.09006	0.000476396
420	CRTAP	ENSG00000170275	3495.5	0.502059	0.00047803
421	CARD16	ENSG00000204397	184.38	1.14553	0.000478038
422	CCN4	ENSG00000104415	86.0071	1.09998	0.000487601
423	BATF2	ENSG00000168062	221.463	1.05828	0.00049087
424	GNG4	ENSG00000168243	37.7034	1.39278	0.00049087
425	ALDH5A1	ENSG00000112294	49.1016	1.1778	0.000491105
426	CSDC2	ENSG00000172346	122.353	1.11657	0.00049259
427	TRAM1L1	ENSG00000174599	36.705	1.36493	0.000519686
428	MTMR11	ENSG00000014914	339.555	0.475966	0.000536861
429	APBB3	ENSG00000113108	277.96	0.656827	0.000536861
430	SAMD5	ENSG00000203727	104.815	1.34829	0.000536861
431	ACOX2	ENSG00000168306	164.669	0.539254	0.000545382
432	MEGF6	ENSG00000162591	848.637	1.03042	0.000548374
433	MVB12B	ENSG00000196814	147.493	0.613587	0.000556773
434	HEXA	ENSG00000213614	2546.41	0.536881	0.00056164
435	IL6	ENSG00000136244	165.811	1.42139	0.000563651
436	SEZ6L2	ENSG00000174938	715.875	0.909255	0.000564608
437	SYNGAP1	ENSG00000197283	501.718	0.513403	0.000577532
438	CREG1	ENSG00000143162	478.283	0.814284	0.0005792
439	BTG2	ENSG00000159388	548.805	0.790162	0.0005792
440	C1orf54	ENSG00000118292	83.4406	1.00482	0.00059643
441	CLCA2	ENSG00000137975	70.311	1.48871	0.000600205
442	SCARB2	ENSG00000138760	2759.77	0.481493	0.000625395
443	TSPAN3	ENSG00000140391	2278.6	0.49064	0.000625857
444	LGMN	ENSG00000100600	850.69	0.456934	0.000629326
445	CFHR1	ENSG00000244414	8.12149	3.75858	0.000631575
446	CHRDL1	ENSG00000101938	23.1078	1.71638	0.000647804
447	HERC5	ENSG00000138646	129.389	1.46912	0.000647804
448	MMP12	ENSG00000262406	17.013	1.37179	0.000647804
449	SUMF1	ENSG00000144455	749.96	0.436058	0.000652352
450	RAP1GAP2	ENSG00000132359	171.757	0.743544	0.000665835
451	MXI1	ENSG00000119950	65.7506	1.01738	0.000670984
452	ARHGAP20	ENSG00000137727	95.968	1.83072	0.000674021
453	ASPA	ENSG00000108381	6.43044	2.6533	0.000686029
454	PNRC1	ENSG00000146278	287.71	1.06032	0.00069026
455	DISP2	ENSG00000140323	119.16	0.813515	0.000699397
456	PRSS12	ENSG00000164099	905.499	0.587928	0.000760657
457	JAKMIP3	ENSG00000188385	15.7271	1.6689	0.000762078
458	FOXP2	ENSG00000128573	65.7707	1.26881	0.000768764
459	GNS	ENSG00000135677	2968.76	0.753978	0.00077898
460	CYP27C1	ENSG00000186684	11.7356	2.26449	0.00077898
461	GPR68	ENSG00000119714	428.856	0.664812	0.000780288
462	MKX-AS1	ENSG00000230500	5.90633	2.96813	0.000783948
463	UNC5B	ENSG00000107731	1475.38	0.663744	0.000787856
464	LETMD1	ENSG00000050426	576.927	0.398043	0.000790716
465	HEXB	ENSG00000049860	2748.49	0.614097	0.000819569
466	KLHL24	ENSG00000114796	72.5351	1.40578	0.000820367
467	FRRS1	ENSG00000156869	69.6774	0.894714	0.000825935
468	LINC00174	ENSG00000179406	137.427	0.944564	0.00082754
469	CDON	ENSG00000064309	19.0632	1.9541	0.000830152
470	―	ENSG00000256218	103.466	1.25161	0.000830152
471	INSYN1	ENSG00000205363	41.3368	1.23641	0.00083105
472	SLC6A17	ENSG00000197106	212.038	0.961099	0.00083236
473	PRICKLE1	ENSG00000139174	104.773	1.30223	0.000833884
474	NCSTN	ENSG00000162736	3251.15	0.50395	0.000835864
475	GTF2IP1	ENSG00000290871	1450.69	0.612135	0.000838051
476	CEBPD	ENSG00000221869	464.041	0.691831	0.000861729
477	CNNM2	ENSG00000148842	142.021	0.704514	0.000866621
478	PPP2R1B	ENSG00000137713	588.014	0.651722	0.000877522
479	HSD17B11	ENSG00000198189	159.157	0.649187	0.000898014
480	KRBA2	ENSG00000184619	88.5425	0.851861	0.000902516
481	EBF4	ENSG00000088881	176.176	1.23201	0.000905249
482	OMD	ENSG00000127083	10.0542	3.06405	0.000939434
483	ZHX2	ENSG00000178764	132.723	0.725766	0.000951617
484	SESN1	ENSG00000080546	307.542	0.845631	0.000975699
485	TMED4	ENSG00000158604	863.686	0.35817	0.000975699
486	SLC6A16	ENSG00000063127	19.0902	1.29929	0.0009969
487	PPIEL	ENSG00000291129	155.543	0.56407	0.00100141
488	MINDY1	ENSG00000143409	153.099	0.598785	0.00102536
489	TENT5A	ENSG00000112773	312.778	0.56269	0.00104707
490	STK36	ENSG00000163482	549.333	0.557346	0.00106168
491	TMEM220-AS1	ENSG00000263400	25.0625	1.35904	0.00106704
492	TLR6	ENSG00000174130	51.2068	0.90008	0.00109594
493	ZNF91	ENSG00000167232	76.0861	0.921655	0.0011011
494	ID1	ENSG00000125968	287.066	1.71126	0.00111368
495	KLHDC9	ENSG00000162755	42.8862	1.25862	0.0011196
496	CTSS	ENSG00000163131	111.967	0.773777	0.00112984
497	NPTXR	ENSG00000221890	198.569	0.656391	0.00114135
498	EEIG1	ENSG00000167106	640.162	0.470223	0.00114391
499	CLIC2	ENSG00000155962	51.4945	2.28476	0.00114633
500	MRC2	ENSG00000011028	9080.26	0.619854	0.00115528
501	IFIH1	ENSG00000115267	247.438	1.10235	0.00121947
502	RASSF5	ENSG00000266094	18.1318	1.33349	0.00129312
503	RASL12	ENSG00000103710	196.936	0.863757	0.00130863
504	MTHFR	ENSG00000177000	419.447	0.568914	0.00133617
505	LRIG3	ENSG00000139263	299.604	1.12694	0.00135124
506	PFKFB2	ENSG00000123836	98.3924	1.18455	0.00136304
507	CFB	ENSG00000243649	28.5879	1.63181	0.00136304
508	SQSTM1	ENSG00000161011	15763.8	0.554113	0.00138281
509	XG	ENSG00000124343	127.779	0.810512	0.00139746
510	―	ENSG00000286909	14.1849	1.4941	0.00140094
511	ASAH1	ENSG00000104763	838.565	0.908638	0.00142912
512	ZC3H12B	ENSG00000102053	21.9271	1.37157	0.00145063
513	DSP	ENSG00000096696	95.68	1.17963	0.00145937
514	MMP7	ENSG00000137673	146.786	0.726821	0.00145937
515	RHOU	ENSG00000116574	104.697	0.898043	0.00146656
516	ZC3H6	ENSG00000188177	57.5704	0.926547	0.0014719
517	PTK2B	ENSG00000120899	66.3629	0.786395	0.00149013
518	HOTAIR	ENSG00000228630	208.516	0.729868	0.00151252
519	NLGN3	ENSG00000196338	22.8669	1.03641	0.00151507
520	HSD11B1L	ENSG00000167733	175.514	1.0753	0.00153164
521	PLBD1	ENSG00000121316	111.74	0.82415	0.00165383
522	BRSK2	ENSG00000174672	7.24339	2.24896	0.00166436
523	CPXM1	ENSG00000088882	225.172	1.10234	0.00167129
524	MAN2B2	ENSG00000013288	1839.16	0.405842	0.0016847
525	CYB561A3	ENSG00000162144	1121.36	0.607619	0.00170801
526	MTURN	ENSG00000180354	218.135	0.505411	0.0017085
527	IFIT3	ENSG00000119917	1131.81	0.690378	0.00172856
528	PLD1	ENSG00000075651	169.69	0.711245	0.0017344
529	VSTM4	ENSG00000165633	126.866	0.614869	0.00174128
530	DHX58	ENSG00000108771	338.683	0.744012	0.00182189
531	TMEM144	ENSG00000164124	78.2215	1.07579	0.00190713
532	CXCL12	ENSG00000107562	62.725	0.836931	0.00190813
533	GSG1	ENSG00000111305	58.4595	1.00498	0.00193029
534	ST7L	ENSG00000007341	312.703	0.369804	0.00193511
535	IFIT1	ENSG00000185745	1222.13	0.867396	0.00198378
536	PJVK	ENSG00000204311	47.839	0.881317	0.00198378
537	IQCN	ENSG00000130518	62.539	0.788278	0.00200322
538	SCD5	ENSG00000145284	437.01	0.883915	0.00201597
539	CA11	ENSG00000063180	37.9695	1.31798	0.00203576
540	SHC2	ENSG00000129946	119.877	1.39788	0.00203576
541	NCAM1	ENSG00000149294	89.744	1.14431	0.00204734
542	AKR1C1	ENSG00000187134	96.4129	0.859461	0.0020685
543	GMDS-DT	ENSG00000250903	43.8212	0.878249	0.00206973
544	FAM182A	ENSG00000125804	35.5726	0.915661	0.00207577
545	IGSF22-AS1	ENSG00000254966	17.554	1.43665	0.00214652
546	RRN3P2	ENSG00000103472	61.4833	1.0116	0.00217651
547	FAM138B	ENSG00000226516	14.6767	1.4184	0.00217651
548	FAM180A	ENSG00000189320	40.8924	1.35338	0.00220357
549	ART5	ENSG00000167311	6.39487	3.00267	0.00221832
550	HLA-DMA	ENSG00000204257	109.954	1.00356	0.00226008
551	IFT172	ENSG00000138002	250.307	0.59314	0.00230218
552	FLRT3	ENSG00000125848	25.1386	1.66709	0.00234517
553	ZNF117	ENSG00000152926	71.0737	1.53318	0.0023483
554	PHF21A	ENSG00000135365	495.417	0.494191	0.00236453
555	FRY	ENSG00000073910	221.653	1.30095	0.00236489
556	FAM13A-AS1	ENSG00000248019	63.4498	0.756376	0.00238935
557	IFITM1	ENSG00000185885	2535.46	1.27021	0.00240354
558	―	ENSG00000293679	3.70579	4.39651	0.00243281
559	GPR63	ENSG00000112218	11.7032	1.56313	0.00244224
560	SLC2A5	ENSG00000142583	13.8027	1.36293	0.00244224
561	LBH	ENSG00000213626	607.544	0.577258	0.00244851
562	PXDNL	ENSG00000147485	14.6469	1.55367	0.0024565
563	FBN2	ENSG00000138829	4461.4	1.27694	0.00250325
564	C1QTNF1	ENSG00000173918	894.282	0.819998	0.00250514
565	SAT1	ENSG00000130066	490.221	0.755671	0.00251621
566	CTSO	ENSG00000256043	370.966	0.835251	0.00252001
567	PCDHB8	ENSG00000120322	7.74425	2.64473	0.00253227
568	MAP3K7CL	ENSG00000156265	606.56	0.440306	0.00254975
569	GTF2IRD1P1	ENSG00000291206	16.8584	6.66431	0.0025511
570	TM6SF2	ENSG00000213996	148.271	1.07925	0.00256054
571	SLC29A3	ENSG00000198246	88.45	0.711158	0.00257018
572	SLC43A2	ENSG00000167703	501.778	0.65032	0.00259767
573	GL000218.1	ENSG00000301761	29.4363	1.27714	0.00262083
574	―	ENSG00000293141	105.595	0.774763	0.00263959
575	PCDHGC3	ENSG00000240184	3403.02	0.774504	0.00265358
576	B3GNT9	ENSG00000237172	561.693	0.514109	0.002663
577	LAMA4	ENSG00000112769	1058.36	0.68424	0.00267417
578	NPAS3	ENSG00000151322	13.7423	3.8359	0.0027493
579	MID1	ENSG00000101871	302.463	0.441799	0.00278072
580	FOXO4	ENSG00000184481	55.8305	0.815768	0.002808
581	EEF1A1P19	ENSG00000249855	49.0206	1.14991	0.0028379
582	BATF3	ENSG00000123685	36.4339	1.18339	0.00289942
583	GGT5	ENSG00000099998	49.6442	1.2194	0.00298909
584	SCPEP1	ENSG00000121064	878.167	0.723352	0.00298909
585	KI270751.1	ENSG00000303902	60.6806	2.04268	0.00300442
586	EDIL3	ENSG00000164176	71.0417	1.54007	0.00303107
587	CLXN	ENSG00000034239	45.3496	0.918224	0.00305094
588	PARP9	ENSG00000138496	457.741	0.778655	0.00305094
589	EOLA1-DT	ENSG00000241769	19.4801	1.20843	0.00305094
590	HOXA10	ENSG00000253293	320.286	0.443886	0.00305094
591	SYT9-AS1	ENSG00000251364	44.7751	0.853748	0.00307484
592	LRP10	ENSG00000197324	7697.26	0.440187	0.00308883
593	CEP126	ENSG00000110318	70.0507	0.954581	0.00309706
594	HOXC10	ENSG00000180818	916.214	0.465109	0.00312782
595	TMEM45A	ENSG00000181458	467.492	0.475359	0.00314085
596	CYP3A7	ENSG00000160870	12.1434	2.21544	0.00316334
597	KANTR	ENSG00000232593	163.994	0.635183	0.00316568
598	GDPD5	ENSG00000158555	104.653	1.09641	0.00326733
599	RETREG1	ENSG00000154153	40.5343	1.40502	0.00335849
600	CCDC30	ENSG00000186409	25.1852	1.04836	0.00336735
601	NAGA	ENSG00000198951	1208.71	0.387583	0.00345268
602	FHDC1	ENSG00000137460	97.9701	1.15966	0.00345773
603	GOLGA6L4	ENSG00000184206	20.8307	1.69812	0.00345773
604	PLAAT4	ENSG00000133321	26.2457	1.76049	0.00347447
605	PGAP4	ENSG00000165152	448.062	0.508509	0.00355682
606	PLA2G6	ENSG00000184381	121.574	0.818738	0.00361138
607	DTX2P1-UPK3BP1-PMS2P11	ENSG00000265479	25.543	1.35657	0.00367885
608	SOX4	ENSG00000124766	185.575	1.1092	0.00371458
609	SFRP1	ENSG00000104332	2937.21	1.09211	0.00372325
610	PTK7	ENSG00000112655	3005.85	0.438603	0.00374371
611	CYP2U1	ENSG00000155016	286.732	0.829293	0.00374371
612	TCEA3	ENSG00000204219	365.262	0.829692	0.00374371
613	CDX1	ENSG00000113722	56.3865	0.821344	0.00374372
614	LRRN3	ENSG00000173114	113.671	1.11188	0.00379833
615	GUCY1A1	ENSG00000164116	8.86598	1.9549	0.003809
616	WDR31	ENSG00000148225	29.1889	1.02533	0.00384844
617	TUB	ENSG00000166402	151.84	0.988638	0.00391724
618	―	ENSG00000293164	126.665	0.465262	0.00395326
619	DGLUCY	ENSG00000133943	398.798	0.5606	0.00401561
620	SP1	ENSG00000185591	746.217	0.489404	0.00402919
621	TRIB2	ENSG00000071575	142.641	0.747898	0.00410111
622	ZNF618	ENSG00000157657	275.893	0.695138	0.00410111
623	AMIGO1	ENSG00000181754	94.4732	0.827194	0.00412308
624	―	ENSG00000286379	62.9044	0.81193	0.00414126
625	TLCD2	ENSG00000185561	115.087	0.641534	0.00414489
626	LRP1	ENSG00000123384	12117.3	0.644589	0.0041539
627	―	ENSG00000308554	16.3164	1.4363	0.00416597
628	ANKH	ENSG00000154122	807.272	0.544224	0.00425629
629	SEPTIN3	ENSG00000100167	70.7584	1.25843	0.00428079
630	―	ENSG00000279255	11.1195	1.71807	0.00428336
631	―	ENSG00000274292	38.5015	1.21196	0.00431573
632	GABPB1-IT1	ENSG00000285410	63.1109	0.664889	0.00441162
633	LINC00578	ENSG00000228221	27.5481	1.01503	0.00443546
634	TMEM9B-AS1	ENSG00000254860	54.2371	0.85417	0.00449676
635	KIAA1671	ENSG00000197077	85.6006	1.04012	0.0045691
636	UBE2L6	ENSG00000156587	1370.27	0.606852	0.00460066
637	PCDHB10	ENSG00000120324	8.79332	2.03575	0.00460266
638	―	ENSG00000290827	3.91234	2.70604	0.00466912
639	ARHGEF9	ENSG00000131089	264.469	0.501153	0.00472296
640	GL000194.1	ENSG00000277400	94.5883	0.835334	0.00476442
641	PCDHGB3	ENSG00000262209	30.027	2.24058	0.00495904
642	DDR1	ENSG00000204580	443.936	0.563123	0.00504952
643	PRKY	ENSG00000293442	252.941	0.447241	0.00505815
644	MMP19	ENSG00000123342	1690.87	0.377957	0.00506973
645	PLPP7	ENSG00000160539	99.5646	0.965872	0.00512925
646	ZNF219	ENSG00000165804	1031.53	0.845582	0.00512925
647	PCAT6	ENSG00000228288	55.1389	1.21129	0.00512925
648	CCDC170	ENSG00000120262	24.2033	1.11795	0.00517149
649	FMNL1	ENSG00000184922	69.3613	0.670389	0.00517149
650	DPP4-DT	ENSG00000230918	23.9965	1.13405	0.00517149
651	PSMG3-AS1	ENSG00000230487	104.28	0.708882	0.00518011
652	CD302	ENSG00000241399	131.489	1.03918	0.00526017
653	ITIH3	ENSG00000162267	15.0257	1.7015	0.00538492
654	CCDC71L	ENSG00000253276	660.653	0.435049	0.00544738
655	AKAP6	ENSG00000151320	68.0226	1.46448	0.00545481
656	―	ENSG00000224713	29.2871	1.14036	0.0054689
657	ORAI3	ENSG00000175938	527.652	0.666913	0.00550005
658	SYT7	ENSG00000011347	37.0428	0.925976	0.00550517
659	CCNG2	ENSG00000138764	247.602	1.08396	0.00556958
660	―	ENSG00000290397	103.657	1.83044	0.00560183
661	CYBRD1	ENSG00000071967	2621.74	1.21009	0.0056201
662	RAB3D	ENSG00000105514	129.493	0.761543	0.00562459
663	TMEM59	ENSG00000116209	2384.7	0.509544	0.00562653
664	CLEC2D	ENSG00000069493	150.987	0.492781	0.00564153
665	FOXC1	ENSG00000054598	86.7265	0.702574	0.00568706
666	CTF1	ENSG00000150281	288.682	0.90113	0.0056873
667	RGS2	ENSG00000116741	118.943	1.12577	0.00574734
668	HSPA12A	ENSG00000165868	455.256	0.578557	0.00587597
669	MAP3K12	ENSG00000139625	516.876	0.627882	0.00588023
670	ADAMTSL4	ENSG00000143382	344.636	0.722406	0.00593683
671	SMPDL3A	ENSG00000172594	65.8331	1.07787	0.00594606
672	STUM	ENSG00000203685	17.1958	2.90599	0.00599258
673	DLGAP1-AS2	ENSG00000262001	60.0083	0.723476	0.00604612
674	RBM43	ENSG00000184898	158.027	1.327	0.00606248
675	AXIN2	ENSG00000168646	12.5621	1.61059	0.00621539
676	ATOH8	ENSG00000168874	99.8302	1.18991	0.00621824
677	TMT1A	ENSG00000185432	108.463	0.935101	0.00635499
678	TRIM34	ENSG00000258659	99.8986	0.792662	0.0063878
679	―	ENSG00000300939	4.48639	2.74619	0.0063878
680	―	ENSG00000284969	154.885	2.23294	0.00646874
681	TRIM66	ENSG00000166436	249.703	0.570043	0.00649427
682	ABCA2	ENSG00000107331	1056.22	0.437015	0.00650625
683	NALT1	ENSG00000237886	50.9436	0.939942	0.00652967
684	HLA-L	ENSG00000291097	57.5232	0.755049	0.00655062
685	GIMAP2	ENSG00000106560	23.985	1.53049	0.00658678
686	TDRD6	ENSG00000180113	8.69854	2.00002	0.00659407
687	CHDH	ENSG00000016391	6.22814	2.31096	0.00665621
688	TMEM107	ENSG00000179029	179.913	0.5856	0.00665621
689	ENPP2	ENSG00000136960	1914.98	1.05891	0.00676719
690	CNPY4	ENSG00000166997	508.181	0.568192	0.0067815
691	TLE2	ENSG00000065717	14.6335	1.34405	0.00680215
692	RUFY3	ENSG00000018189	398.554	0.444825	0.00689699
693	PPP1R3C	ENSG00000119938	369.787	0.799117	0.00702151
694	PCED1B	ENSG00000179715	50.7445	0.99413	0.00706088
695	CEMIP	ENSG00000103888	812.861	1.05664	0.00707011
696	―	ENSG00000274718	19.4855	1.56752	0.00707011
697	―	ENSG00000277287	94.4549	0.795794	0.00714949
698	HYDIN2	ENSG00000276975	19.7667	1.70962	0.00720094
699	KCTD16	ENSG00000183775	23.6539	1.70254	0.00725203
700	CMYA5	ENSG00000164309	18.3019	1.34449	0.00727598
701	―	ENSG00000267288	35.5943	1.32719	0.00728323
702	FAM234B	ENSG00000084444	137.311	0.526902	0.00729414
703	GALC	ENSG00000054983	221.147	0.906439	0.0073671
704	CYB5RL	ENSG00000215883	73.3212	0.791314	0.00738712
705	PCDHGB7	ENSG00000254122	113.781	1.31626	0.00751205
706	DNAH7	ENSG00000118997	8.40101	1.90605	0.00753626
707	DNASE2	ENSG00000105612	661.35	0.498649	0.00758507
708	TAPBPL	ENSG00000139192	273.648	0.752907	0.00759664
709	COPG2IT1	ENSG00000286214	30.3528	1.12172	0.00771721
710	ATP2B1-AS1	ENSG00000271614	25.5189	1.19244	0.00771906
711	LINC00869	ENSG00000291158	80.5633	0.89255	0.0077887
712	COL10A1	ENSG00000123500	27.0046	1.49479	0.00781637
713	MAF	ENSG00000178573	17.1847	1.35038	0.00783404
714	NEAT1	ENSG00000245532	6970.72	0.961459	0.00783906
715	PER3	ENSG00000049246	70.7875	1.30331	0.00784741
716	KCNIP2	ENSG00000120049	38.9569	0.895243	0.00785276
717	ITGA1	ENSG00000213949	1025.72	0.694482	0.00785276
718	TSC22D1	ENSG00000102804	902.921	0.662217	0.00789464
719	MMP2	ENSG00000087245	12000.8	0.642923	0.00795386
720	RASL10B	ENSG00000270885	113.281	0.822366	0.00795386
721	SLC38A4	ENSG00000139209	16.5331	1.92999	0.00796031
722	―	ENSG00000303745	232.382	0.694778	0.00798669
723	HPS4	ENSG00000100099	409.352	0.366393	0.00800106
724	H6PD	ENSG00000049239	1621.77	0.604975	0.00801408
725	―	ENSG00000290537	17.4298	1.47595	0.00803339
726	CD72	ENSG00000137101	17.6459	1.16843	0.0080471
727	―	ENSG00000304732	9.41546	1.52918	0.00806977
728	MTA3	ENSG00000057935	365.537	0.329299	0.00815101
729	CCL5	ENSG00000271503	65.7687	1.77166	0.00816558
730	DNM1P41	ENSG00000280038	6.16541	2.5708	0.00826847
731	HSPB2	ENSG00000170276	215.084	1.0553	0.00835185
732	PKD1L2	ENSG00000166473	36.9904	0.934769	0.00862953
733	ARMH1	ENSG00000198520	26.3026	1.27925	0.00862953
734	AFF3	ENSG00000144218	219.855	1.1433	0.00864984
735	AKNA	ENSG00000106948	270.672	0.424995	0.00866096
736	ACSS3	ENSG00000111058	178.543	0.771516	0.00866789
737	TPCN1	ENSG00000186815	2556.29	0.561352	0.00872343
738	BMF	ENSG00000104081	10.7811	1.63589	0.00872378
739	ADHFE1	ENSG00000147576	67.9723	0.524162	0.00876777
740	MEIS1	ENSG00000143995	390.481	0.739581	0.00877083
741	SLC37A1	ENSG00000160190	18.7312	1.79881	0.00877083
742	DOCK6-AS1	ENSG00000267082	14.5919	1.1534	0.00877083
743	CCND2-AS1	ENSG00000255920	15.422	1.21714	0.00879528
744	HOXA11-AS	ENSG00000240990	151.278	0.799357	0.00879984
745	CNTNAP1	ENSG00000108797	1741.2	0.57062	0.00888329
746	SOCS3	ENSG00000184557	229.883	0.646912	0.00888329
747	CYS1	ENSG00000205795	87.2367	0.533965	0.00888329
748	BCL6	ENSG00000113916	383.452	0.674699	0.00889762
749	CYP46A1	ENSG00000036530	17.3319	1.12262	0.00907304
750	SDHAP3	ENSG00000291079	124.999	0.408036	0.00927772
751	MANSC1	ENSG00000111261	104.669	0.747612	0.00932044
752	SIPA1L1	ENSG00000197555	764.932	0.506069	0.0093697
753	LINC02977	ENSG00000259953	33.8469	0.803437	0.0093697
754	ZNF606	ENSG00000166704	79.1866	0.761274	0.00937046
755	SUOX	ENSG00000139531	232.352	0.562966	0.00937827
756	―	ENSG00000283175	56.8474	0.985647	0.00938359
757	FAM78A	ENSG00000126882	34.9669	0.929292	0.00952356
758	LCP1	ENSG00000136167	10.0755	1.8436	0.00952356
759	MCF2L	ENSG00000126217	42.1297	1.20447	0.00959758
760	LRP5	ENSG00000162337	272.632	0.472585	0.00981615
761	ADGRL1	ENSG00000072071	103.669	1.09419	0.00983171
762	IL20RB	ENSG00000174564	202.329	0.518123	0.0100294
763	CD27-AS1	ENSG00000215039	338.379	0.523712	0.0100313
764	GTF2IRD2	ENSG00000196275	110.299	0.553509	0.010102
765	IRF9	ENSG00000213928	728.196	0.689968	0.0101493
766	TMEM253	ENSG00000232070	16.7474	1.20426	0.0101629
767	EFNA5	ENSG00000184349	174.504	0.777893	0.0102112
768	PCDHGA10	ENSG00000253846	74.7973	1.49101	0.0102251
769	PBX2	ENSG00000204304	1025.07	0.286539	0.0102278
770	PNMA3	ENSG00000183837	3.67856	4.55865	0.010305
771	ITGB5	ENSG00000082781	1502.2	0.324107	0.0103796
772	TRIM38	ENSG00000112343	454.603	0.300926	0.0104145
773	MIR29B2CHG	ENSG00000203709	28.6729	0.9755	0.0104417
774	SLC38A6	ENSG00000139974	180.586	0.850569	0.010443
775	ZNF436	ENSG00000125945	143.305	0.619395	0.0105047
776	ETV7	ENSG00000010030	44.3935	1.2295	0.0105089
777	LOXL4	ENSG00000138131	20202.2	0.540299	0.010617
778	TMEM229B	ENSG00000198133	42.059	1.15921	0.0106431
779	SLC9A3-AS1	ENSG00000225138	415.533	0.490611	0.0107002
780	PCDHGA12	ENSG00000253159	275.995	1.2394	0.0107002
781	NTNG2	ENSG00000196358	37.9527	0.867622	0.0107457
782	LINC01081	ENSG00000268754	12.058	1.76751	0.0108182
783	―	ENSG00000301873	19.2972	1.92401	0.0108221
784	INTU	ENSG00000164066	121.442	0.943906	0.0108659
785	ZNF429	ENSG00000197013	41.3467	1.10768	0.0108668
786	SERTAD2	ENSG00000179833	539.179	0.62838	0.0109677
787	CSRNP3	ENSG00000178662	14.2848	1.89405	0.0109924
788	PRSS35	ENSG00000146250	14.28	1.76447	0.0110002
789	MRAS	ENSG00000158186	590.916	0.311244	0.0110897
790	GBP4	ENSG00000162654	17.5417	2.37976	0.0110906
791	ZNF141	ENSG00000131127	42.7835	0.857869	0.0111456
792	ZNF503	ENSG00000165655	114.224	0.783819	0.0111456
793	―	ENSG00000293429	89.0312	0.73736	0.0111456
794	―	ENSG00000264705	6.31975	2.39017	0.0112469
795	NR4A2	ENSG00000153234	48.1754	1.53772	0.0112873
796	PCDHB5	ENSG00000113209	8.71048	1.76991	0.0112986
797	DTWD1	ENSG00000104047	198.019	0.820063	0.0115036
798	HEXIM1	ENSG00000186834	494.393	0.415853	0.0115036
799	MIR130AHG	ENSG00000254602	11.3229	1.29415	0.0115036
800	SLC44A1	ENSG00000070214	514.695	0.688338	0.0117136
801	MARCHF8	ENSG00000165406	300.041	0.536828	0.0117136
802	LYRM9	ENSG00000232859	149.635	0.709294	0.0118408
803	TMEM98	ENSG00000006042	2486.98	0.346811	0.0118895
804	MAP3K8	ENSG00000107968	15.1426	1.30962	0.0118971
805	FCHSD2	ENSG00000137478	303.374	0.881952	0.0118971
806	MCTP2	ENSG00000140563	136.122	0.970426	0.0120152
807	ZNF233	ENSG00000159915	22.4983	0.921143	0.0120504
808	VAMP1	ENSG00000139190	340.381	0.667128	0.0120773
809	SHC3	ENSG00000148082	59.7019	0.877791	0.012095
810	GPR137B	ENSG00000077585	241.186	0.741221	0.0121013
811	ASAP3	ENSG00000088280	387.939	0.438536	0.0121154
812	JAG1	ENSG00000101384	433.338	0.974815	0.0121154
813	KLHDC7B	ENSG00000130487	6.60069	4.11704	0.0121952
814	FOXN3	ENSG00000053254	134.277	1.01942	0.0122082
815	MGARP	ENSG00000137463	241.241	0.819086	0.0123227
816	LDAF1	ENSG00000011638	371.572	0.492854	0.0123349
817	ACP6	ENSG00000162836	101.803	0.601993	0.0123669
818	TMEM37	ENSG00000171227	17.2315	1.27303	0.0123669
819	HLA-E	ENSG00000204592	6113.71	0.445603	0.0125702
820	ARSG	ENSG00000141337	272.4	0.386472	0.0125905
821	BPTFP1	ENSG00000263647	13.092	3.06313	0.0127758
822	PIEZO2	ENSG00000154864	295.094	1.10982	0.0128285
823	NR2F1-AS1	ENSG00000237187	166.094	0.576387	0.0128285
824	PCDHGA1	ENSG00000204956	17.3928	1.81957	0.0131013
825	CCDC146	ENSG00000135205	29.3714	0.825076	0.0131482
826	HOXC4	ENSG00000198353	84.4221	0.654379	0.0132359
827	CBX4	ENSG00000141582	200.409	0.376636	0.0133286
828	NYNRIN	ENSG00000205978	918.269	0.504992	0.0133442
829	LAMA1	ENSG00000101680	340.526	0.517763	0.0134327
830	BDH2	ENSG00000164039	560.145	0.536948	0.013469
831	―	ENSG00000274415	4.2558	3.25144	0.013469
832	PLA2G4C	ENSG00000105499	268.592	0.540575	0.0136032
833	PLAG1	ENSG00000181690	113.927	0.982173	0.0136229
834	―	ENSG00000254559	120.093	0.907457	0.0136229
835	―	ENSG00000280339	3.61952	4.1836	0.0136229
836	SLC27A1	ENSG00000130304	456.392	0.816719	0.0137483
837	GDPGP1	ENSG00000183208	22.2973	1.14404	0.013826
838	SMIM14	ENSG00000163683	282.912	0.939674	0.0139379
839	FOXL2NB	ENSG00000206262	245.345	0.918084	0.0139471
840	―	ENSG00000283189	239.483	0.869831	0.0139794
841	HOXC-AS2	ENSG00000250133	41.2062	1.06535	0.0139931
842	―	ENSG00000261625	100.071	0.746755	0.0140494
843	HVCN1	ENSG00000122986	87.0474	0.465488	0.0141011
844	KLF14	ENSG00000266265	12.2542	1.30422	0.0141855
845	PCMTD1-DT	ENSG00000228801	38.7807	0.666876	0.0142965
846	ABCB4	ENSG00000005471	9.43032	2.92008	0.0143222
847	RASA4	ENSG00000105808	77.4615	0.661027	0.0143811
848	ACE	ENSG00000159640	893.044	0.422134	0.0143957
849	―	ENSG00000288903	15.4472	1.16021	0.0145718
850	ZBTB25	ENSG00000089775	93.6867	0.829688	0.0146328
851	―	ENSG00000279246	11.1345	1.5024	0.0146755
852	RNF157	ENSG00000141576	700.005	0.414234	0.0148687
853	CCNYL2	ENSG00000290445	6.44015	2.3228	0.0148769
854	LPAR6	ENSG00000139679	106.309	0.923687	0.014895
855	PCDHGA9	ENSG00000261934	22.8885	1.57196	0.0149728
856	PPP1R9A	ENSG00000158528	6.68526	2.10784	0.0150106
857	SNRPN	ENSG00000128739	1394.51	0.526307	0.0150178
858	FBXL20	ENSG00000108306	220.403	0.529619	0.0152642
859	―	ENSG00000258311	93.6819	0.520015	0.0152795
860	HMCN2	ENSG00000148357	53.2925	0.883341	0.0153619
861	CCDC191	ENSG00000163617	61.6938	0.759422	0.015481
862	LINC01145	ENSG00000290867	98.4586	0.639118	0.015481
863	JAG2	ENSG00000184916	38.548	1.06964	0.0155594
864	ZKSCAN8	ENSG00000198315	156.218	1.0804	0.0156436
865	CTNS	ENSG00000040531	504.61	0.503887	0.0156829
866	MCOLN3	ENSG00000055732	30.6093	0.930661	0.0157448
867	FABP3	ENSG00000121769	2301.6	0.753657	0.0157721
868	―	ENSG00000291043	20.3543	0.981208	0.0157721
869	PDK4	ENSG00000004799	25.7972	3.58414	0.0158258
870	FAM149A	ENSG00000109794	36.7083	1.00327	0.0158258
871	GFRA1	ENSG00000151892	603.683	0.486065	0.0158258
872	ZNF836	ENSG00000196267	46.927	0.728815	0.0158304
873	C2orf66	ENSG00000187944	14.137	1.28087	0.0158675
874	ZNF503-AS2	ENSG00000237149	16.5476	1.3222	0.0158675
875	ALDH3B1	ENSG00000006534	1586.08	0.684997	0.0158697
876	CAPN3	ENSG00000092529	190.827	0.485869	0.0160136
877	TMEM47	ENSG00000147027	424.348	1.35965	0.0160136
878	NOVA1	ENSG00000139910	171.69	0.583729	0.0161651
879	ACKR3	ENSG00000144476	184.214	0.990305	0.0162829
880	―	ENSG00000295157	17.4796	1.48044	0.016324
881	ZMYM3	ENSG00000147130	513.362	0.414623	0.0165023
882	OASL	ENSG00000135114	89.2416	2.67559	0.0165669
883	NFE2L1	ENSG00000082641	4584.79	0.291026	0.0166198
884	TMTC1	ENSG00000133687	2215.01	0.912869	0.0166198
885	CALHM2	ENSG00000138172	387.346	0.429257	0.0166198
886	PRUNE1	ENSG00000143363	91.7742	0.611991	0.0166332
887	ADGRA2	ENSG00000020181	2230.09	0.6197	0.0168504
888	THRB	ENSG00000151090	106.851	1.01435	0.0169765
889	PLCG2	ENSG00000197943	31.6947	0.922559	0.0169968
890	ABLIM1	ENSG00000099204	366.079	0.49687	0.017031
891	OTUD1	ENSG00000165312	48.7305	1.13752	0.0171444
892	PLGLB1	ENSG00000183281	19.7739	1.60724	0.0171444
893	DDIT4	ENSG00000168209	350.524	0.696721	0.0174355
894	HEG1	ENSG00000173706	1318.02	1.06194	0.0174717
895	CCL13	ENSG00000181374	3.44712	2.64557	0.0174839
896	―	ENSG00000259828	9.03184	2.14447	0.017519
897	RNASE4	ENSG00000258818	139.729	0.694317	0.0176776
898	ZNF546	ENSG00000187187	31.8737	0.98546	0.0178472
899	―	ENSG00000274565	109.45	0.632944	0.0178472
900	REC8	ENSG00000100918	266.278	0.625991	0.0178523
901	ITM2B	ENSG00000136156	2684.2	0.756854	0.0179576
902	EMBP1	ENSG00000291141	5.66192	3.28903	0.0179815
903	LINC00265	ENSG00000188185	206.468	0.692602	0.0180151
904	SVIL	ENSG00000197321	1011.4	0.821192	0.0181771
905	AMY2B	ENSG00000240038	60.6339	0.770266	0.0182347
906	FAM151B-DT	ENSG00000249042	53.2159	0.815678	0.0186674
907	CPD	ENSG00000108582	1348.51	1.03416	0.018804
908	―	ENSG00000287077	15.4451	1.17569	0.018804
909	CDH10	ENSG00000040731	9.66715	4.55221	0.0188327
910	HMOX1	ENSG00000100292	363.612	0.47822	0.0189185
911	SERPINF1	ENSG00000132386	1442.17	0.677697	0.0189583
912	SAMD9L	ENSG00000177409	640.91	0.96198	0.0189615
913	VPS41	ENSG00000006715	509.028	0.677543	0.0189919
914	―	ENSG00000233030	10.5104	1.30439	0.0189919
915	SLC30A1	ENSG00000170385	278.256	0.963647	0.0195884
916	KLHL38	ENSG00000175946	3.35158	2.84237	0.0195884
917	SOCS5	ENSG00000171150	301.111	1.02157	0.019814
918	RNASEL	ENSG00000135828	131.073	0.600429	0.0198143
919	ENTPD1	ENSG00000138185	186.624	0.52424	0.019872
920	CHRM2	ENSG00000181072	871.82	0.882746	0.0199599
921	TNS3	ENSG00000136205	2975.1	0.714131	0.0200022
922	DUSP4	ENSG00000120875	237.68	0.38079	0.0200989
923	PRDM11	ENSG00000019485	207.987	0.448576	0.0201292
924	SLC39A11	ENSG00000133195	453.784	0.333266	0.0202936
925	ZNF556	ENSG00000172000	15.1786	1.05829	0.0202936
926	―	ENSG00000286488	7.16189	1.85078	0.0210789
927	LRRIQ3	ENSG00000162620	8.09647	1.72956	0.0211717
928	SIDT2	ENSG00000149577	1116.65	0.388181	0.0212537
929	PANX2	ENSG00000073150	26.7149	0.972202	0.0213779
930	LINC02035	ENSG00000273033	61.5188	0.817	0.0214371
931	TMOD1	ENSG00000136842	67.3779	1.41631	0.021447
932	INSR	ENSG00000171105	106.458	0.704684	0.0215389
933	ABCC6	ENSG00000091262	13.2953	1.51539	0.0216011
934	SMTNL1	ENSG00000214872	11.1686	2.75806	0.0216262
935	―	ENSG00000285796	30.7852	1.11703	0.0217604
936	CEBPB	ENSG00000172216	632.943	0.365804	0.0219324
937	MOB3B	ENSG00000120162	25.9406	1.22395	0.0220045
938	ENPP4	ENSG00000001561	16.1538	2.12649	0.0220283
939	TTC3	ENSG00000182670	2924.28	0.461534	0.0220636
940	H2AC6	ENSG00000180573	504.238	0.683087	0.0221583
941	CLN5	ENSG00000102805	537.028	0.543035	0.0221681
942	―	ENSG00000272405	5.66918	2.07705	0.0222077
943	RBMS3	ENSG00000144642	164.526	1.15075	0.0224146
944	COL26A1	ENSG00000160963	46.682	0.999965	0.0226557
945	BACE1-AS	ENSG00000278768	103.421	0.663704	0.0226557
946	CASP10	ENSG00000003400	59.5119	0.744144	0.0226753
947	LDB1	ENSG00000198728	2094.73	0.464582	0.0227019
948	KLRD1	ENSG00000134539	4.12012	2.61268	0.0227101
949	―	ENSG00000278867	5.54152	2.26205	0.0227101
950	SLC39A8	ENSG00000138821	121.783	1.01672	0.0227197
951	PSORS1C1	ENSG00000204540	47.9116	1.03652	0.0227197
952	NAPEPLD	ENSG00000161048	100.043	0.800766	0.0227514
953	ZMAT3	ENSG00000172667	1330.71	0.665752	0.0229142
954	NINJ2-AS1	ENSG00000177406	49.6964	0.696226	0.0229142
955	USP49	ENSG00000164663	77.0356	0.625222	0.0229183
956	CCPG1	ENSG00000260916	491.228	1.37133	0.0229183
957	PALM	ENSG00000099864	54.7475	1.54071	0.022952
958	SLC6A8	ENSG00000130821	833.42	0.462951	0.023007
959	EXT2	ENSG00000151348	2617.01	0.361327	0.0231115
960	PGM2L1	ENSG00000165434	118.733	0.747878	0.0231263
961	DTX4	ENSG00000110042	803.002	0.6162	0.0231528
962	MFSD1	ENSG00000118855	1748.83	0.770157	0.0231906
963	―	ENSG00000247934	10.4745	1.34325	0.0235575
964	ITPR1	ENSG00000150995	20.8727	1.70793	0.0235658
965	ZNF667-AS1	ENSG00000166770	202.645	0.692139	0.0237038
966	RNF112	ENSG00000128482	179.473	0.842742	0.0238973
967	GASK1B	ENSG00000164125	631.002	1.00809	0.023984
968	―	ENSG00000310191	6.51032	1.81641	0.023984
969	DDOST	ENSG00000244038	6256.58	0.276321	0.0239904
970	LINC00941	ENSG00000285517	45.4832	0.66555	0.024011
971	FGF13	ENSG00000129682	21.3384	1.72193	0.024025
972	―	ENSG00000262877	59.7099	0.603793	0.0240659
973	PPP4R4	ENSG00000119698	24.5413	2.05672	0.0240671
974	FKBP9	ENSG00000122642	3384.08	0.397842	0.0240671
975	LMO4	ENSG00000143013	282.119	0.407382	0.0241284
976	KCNH1	ENSG00000143473	19.3921	2.27746	0.0242242
977	―	ENSG00000272572	6.67883	2.14028	0.0242242
978	―	ENSG00000260693	13.0549	1.21288	0.0243488
979	―	ENSG00000279108	4.85929	2.26495	0.0245161
980	RAMP1	ENSG00000132329	84.026	1.17953	0.0250402
981	―	ENSG00000290399	107.764	0.760067	0.0251502
982	SLC25A42	ENSG00000181035	331.361	0.470906	0.0251856
983	―	ENSG00000294531	18.6161	1.47897	0.0251872
984	―	ENSG00000287978	15.8992	1.24776	0.0252157
985	ERMP1	ENSG00000099219	493.324	0.97186	0.0255742
986	PTCH2	ENSG00000117425	123.004	0.579755	0.0256802
987	CTSA	ENSG00000064601	4833.3	0.527002	0.0257627
988	MR1	ENSG00000153029	586.501	0.527139	0.0258825
989	SEMA3C	ENSG00000075223	944.574	1.61931	0.0260649
990	DHRS3	ENSG00000162496	16.7824	1.89026	0.0260649
991	MACROD2	ENSG00000172264	4.48556	2.35237	0.0260649
992	LINC01605	ENSG00000253161	109.89	0.589322	0.0260649
993	―	ENSG00000261324	20.9148	1.57579	0.0260649
994	IFIT2	ENSG00000119922	330.597	0.909598	0.0263487
995	KCNJ5	ENSG00000120457	5.94761	2.85763	0.0263748
996	HS1BP3	ENSG00000118960	601.146	0.515715	0.0265653
997	SIX4	ENSG00000100625	99.8646	0.643184	0.0265702
998	TXNDC15	ENSG00000113621	1378.28	0.307512	0.0267479
999	ZNF608	ENSG00000168916	151.68	0.972732	0.0267479
1000	TMEM119	ENSG00000183160	2222.91	0.448034	0.0267479
1001	HAGLROS	ENSG00000226363	24.4045	1.14701	0.0267479
1002	SLC2A11	ENSG00000133460	156.206	0.411928	0.0269345
1003	―	ENSG00000272983	7.61924	1.58941	0.0269453
1004	CUTALP	ENSG00000293514	201.185	0.649068	0.0269607
1005	CDC14B	ENSG00000081377	273.535	0.648047	0.0271971
1006	PLCL1	ENSG00000115896	7.08417	1.91842	0.0272054
1007	GLB1	ENSG00000170266	1102.31	0.398974	0.0272241
1008	RHOF	ENSG00000139725	82.7256	0.675713	0.0272442
1009	ELFN1	ENSG00000225968	202.134	0.508183	0.0272442
1010	RAB27B	ENSG00000041353	341.037	1.31461	0.0272945
1011	TLE1	ENSG00000196781	233.934	0.367104	0.0274367
1012	MISP3	ENSG00000141854	43.6331	1.18314	0.027529
1013	TCL6	ENSG00000187621	7.14165	2.47832	0.027529
1014	TMEM79	ENSG00000163472	82.5478	0.639952	0.0277506
1015	COL1A2	ENSG00000164692	112753	0.383284	0.0277506
1016	BTN3A1	ENSG00000026950	417.873	0.501313	0.0277795
1017	CRYZL2P	ENSG00000293477	152.968	0.404098	0.0280235
1018	KBTBD3	ENSG00000182359	27.5038	0.915257	0.0280521
1019	RPL23AP49	ENSG00000243422	5.25357	3.36028	0.0281526
1020	VN1R1	ENSG00000178201	13.0322	1.22065	0.0281615
1021	ODAD2	ENSG00000169126	40.9578	0.818546	0.0282129
1022	PCDHGA6	ENSG00000253731	71.1534	1.12652	0.0282924
1023	RUNX1-AS1	ENSG00000286153	8.71429	1.40328	0.0282924
1024	QPCT	ENSG00000115828	719.205	0.606659	0.0283266
1025	PC	ENSG00000173599	188.926	0.551848	0.0283679
1026	HHIPL1	ENSG00000182218	467.469	0.479334	0.0286702
1027	DDX17	ENSG00000100201	4143.44	0.42451	0.0286861
1028	―	ENSG00000288899	7.82129	2.99615	0.0287012
1029	PICART1	ENSG00000246640	25.7231	0.848757	0.0287313
1030	―	ENSG00000293268	55.0022	0.610694	0.0287313
1031	FANCF	ENSG00000183161	55.2433	0.742733	0.0287617
1032	COL4A5	ENSG00000188153	726.335	0.937329	0.0288103
1033	BMP4	ENSG00000125378	795.165	0.494261	0.029148
1034	GM2A	ENSG00000196743	2174.68	0.438021	0.0292749
1035	PCDHB6	ENSG00000113211	3.46436	2.29711	0.0292822
1036	HAPLN4	ENSG00000187664	30.9251	1.54875	0.0292999
1037	ZBED3	ENSG00000132846	88.9036	0.634531	0.0293082
1038	GPRASP1	ENSG00000198932	108.96	0.975715	0.0294435
1039	SFXN3	ENSG00000107819	1296.09	0.295984	0.029508
1040	RASD1	ENSG00000108551	24.8311	0.943241	0.0295453
1041	ANTXR2	ENSG00000163297	1268.99	0.604973	0.0296236
1042	―	ENSG00000239775	15.1795	1.33325	0.029785
1043	KYNU	ENSG00000115919	132.729	0.768423	0.0298732
1044	―	ENSG00000286177	26.5731	1.11777	0.0301405
1045	ROR2	ENSG00000169071	136.522	0.468864	0.0302549
1046	PPT2-EGFL8	ENSG00000258388	44.0706	0.889248	0.0302549
1047	PABIR1	ENSG00000187866	190.037	0.540011	0.0302886
1048	―	ENSG00000291211	40.0764	0.753488	0.0304575
1049	ZNF525	ENSG00000203326	19.4378	0.992307	0.0304817
1050	EPHA5-AS1	ENSG00000250846	15.1896	4.28042	0.0307266
1051	CYB5D2	ENSG00000167740	325.477	0.459962	0.0309173
1052	CCDC74A	ENSG00000163040	139.31	0.72274	0.0312618
1053	―	ENSG00000302786	22.6855	1.06056	0.0313103
1054	AARD	ENSG00000205002	13.6308	4.31504	0.0313674
1055	PNMA8A	ENSG00000182013	130.145	0.853494	0.0315744
1056	CCDC115	ENSG00000136710	341.104	0.297166	0.0315856
1057	ATP1A1	ENSG00000163399	4683.54	0.298024	0.0316844
1058	ZFHX4	ENSG00000091656	155.624	0.996829	0.0316879
1059	EFCAB6	ENSG00000186976	15.0042	1.08762	0.0317306
1060	HGSNAT	ENSG00000165102	1977.27	0.489627	0.0318439
1061	RBP5	ENSG00000139194	21.2134	1.53793	0.0318512
1062	―	ENSG00000300559	5.70351	1.71009	0.0318512
1063	VSIR	ENSG00000107738	957.564	0.723443	0.0318514
1064	LINC02185	ENSG00000262097	7.06393	1.58696	0.0318514
1065	RGMA	ENSG00000182175	11.1759	1.53471	0.0318782
1066	PALMD	ENSG00000099260	43.0301	0.831491	0.0319277
1067	MAP7	ENSG00000135525	11.6418	1.30392	0.0320056
1068	HGF	ENSG00000019991	767.525	0.998475	0.0321782
1069	STX16	ENSG00000124222	986.191	0.387462	0.0326638
1070	ZFAND4	ENSG00000172671	33.3183	0.917597	0.0327769
1071	LINC02604	ENSG00000273142	170.676	0.783331	0.0328751
1072	PDCD4-AS1	ENSG00000203497	33.4583	0.827427	0.0330063
1073	LBX2-AS1	ENSG00000257702	167.722	0.683551	0.0330063
1074	WHAMMP4	ENSG00000290876	92.1951	0.942938	0.0330481
1075	―	ENSG00000230623	10.2364	1.09471	0.033165
1076	EFNA3	ENSG00000143590	14.7854	1.32113	0.0332623
1077	―	ENSG00000258728	48.8049	0.867433	0.0332989
1078	CYP27A1	ENSG00000135929	551.931	0.750934	0.0333809
1079	TTC28-AS1	ENSG00000235954	71.9873	0.576353	0.0333825
1080	P2RX4	ENSG00000135124	296.076	0.563897	0.0337509
1081	ZNF436-AS1	ENSG00000249087	27.8517	0.925406	0.0337512
1082	―	ENSG00000308204	15.7704	1.14701	0.0337584
1083	GUCY1B1	ENSG00000061918	59.861	1.1033	0.0338421
1084	ECM2	ENSG00000106823	22.5881	1.13795	0.0341551
1085	SGMS1-AS1	ENSG00000226200	22.7875	0.902853	0.0343766
1086	MRAP2	ENSG00000135324	10.1886	1.15998	0.0344671
1087	TMEM178A	ENSG00000152154	93.1672	0.48316	0.0345458
1088	―	ENSG00000286190	701.549	0.508361	0.0347603
1089	PCYOX1	ENSG00000116005	1063.51	0.764683	0.034764
1090	NNT-AS1	ENSG00000248092	57.014	0.819229	0.034803
1091	―	ENSG00000305128	7.82697	1.8263	0.03485
1092	PPT2	ENSG00000221988	344.067	0.536519	0.0349053
1093	CD99L2	ENSG00000102181	2272.8	0.407798	0.0349079
1094	MIR34AHG	ENSG00000228526	421.644	0.368101	0.035003
1095	TPK1	ENSG00000196511	40.4149	0.687999	0.0351276
1096	DPP4	ENSG00000197635	695.399	0.606853	0.0351396
1097	PDGFRA	ENSG00000134853	1699.05	0.851306	0.0352107
1098	GDPD1	ENSG00000153982	6.61576	2.12996	0.0353349
1099	COL24A1	ENSG00000171502	15.6505	1.29248	0.0353349
1100	WNT3	ENSG00000108379	59.8237	0.606655	0.0355263
1101	AP1G2-AS1	ENSG00000258727	319.634	0.540774	0.0356047
1102	HHAT	ENSG00000054392	77.1145	0.724134	0.0356936
1103	ZFHX2	ENSG00000136367	43.9678	0.97438	0.0358881
1104	CA5B	ENSG00000169239	110.559	0.770759	0.0358881
1105	―	ENSG00000227482	3.46769	2.47841	0.0359024
1106	HERC6	ENSG00000138642	605.981	0.558968	0.0362191
1107	―	ENSG00000280046	28.4381	1.02202	0.0362191
1108	ZNF37BP	ENSG00000293313	93.5726	0.819636	0.0362191
1109	ARID5B	ENSG00000150347	1766.24	0.852117	0.0362272
1110	CEP95	ENSG00000258890	119.484	0.395184	0.0362457
1111	LINC00472	ENSG00000233237	51.3462	0.97379	0.0362868
1112	B2M	ENSG00000166710	35921.8	0.544106	0.0363831
1113	EGR2	ENSG00000122877	46.0788	1.4348	0.0366754
1114	PIGV	ENSG00000060642	289.018	0.409048	0.0367917
1115	CCDC103	ENSG00000167131	58.7202	0.71212	0.0368062
1116	KLF11	ENSG00000172059	140.196	0.900075	0.0368119
1117	CD47	ENSG00000196776	913.214	0.553569	0.0371525
1118	PHYH	ENSG00000107537	352.843	0.377877	0.0372323
1119	IFI6	ENSG00000126709	3880.11	0.911004	0.0372504
1120	PTPRD	ENSG00000153707	50.7769	0.960243	0.0375152
1121	TLCD5	ENSG00000181264	137.02	0.47337	0.0375152
1122	DTNA	ENSG00000134769	189.134	0.541747	0.037604
1123	CPA4	ENSG00000128510	266.513	0.430668	0.0377178
1124	―	ENSG00000262691	54.6254	0.767842	0.0377946
1125	―	ENSG00000267002	77.8577	0.613857	0.0378219
1126	MLYCD	ENSG00000103150	47.9956	0.677428	0.0378628
1127	THSD4	ENSG00000187720	1661.37	0.629724	0.0382435
1128	―	ENSG00000304289	8.42008	1.35098	0.0384469
1129	TLR4	ENSG00000136869	26.2526	1.20417	0.0385002
1130	ZNF292	ENSG00000188994	83.2988	1.02885	0.0385488
1131	HOXD11	ENSG00000128713	679.431	0.577296	0.0388965
1132	―	ENSG00000285979	9.03751	2.02908	0.0390857
1133	CLCN7	ENSG00000103249	1467.26	0.488484	0.0391048
1134	LASP1NB	ENSG00000263874	27.738	0.734585	0.0394127
1135	INTS6L	ENSG00000165359	101.063	0.804585	0.0394612
1136	RNF114	ENSG00000124226	1247.4	0.319801	0.0395525
1137	H2BC5	ENSG00000158373	138.08	0.628631	0.0397408
1138	KDSR	ENSG00000119537	588.577	0.520252	0.0397888
1139	PARP3	ENSG00000041880	263.356	0.363814	0.0399848
1140	BST1	ENSG00000109743	351.794	0.338839	0.0399848
1141	TNFRSF10B-AS1	ENSG00000246130	3.81796	2.32965	0.0399848
1142	PKNOX2	ENSG00000165495	10.4795	2.94558	0.0400623
1143	GPR153	ENSG00000158292	813.959	0.39392	0.040205
1144	MNT	ENSG00000070444	545.999	0.370211	0.0402957
1145	GRAMD4	ENSG00000075240	100.614	0.518556	0.0404245
1146	―	ENSG00000278932	98.6604	1.02602	0.0404245
1147	―	ENSG00000286705	8.62462	1.46212	0.0407813
1148	TMEM143	ENSG00000161558	83.8201	0.581903	0.0407887
1149	RUNDC3A	ENSG00000108309	7.6238	1.70315	0.040827
1150	ZC3H10	ENSG00000135482	79.9593	0.479178	0.040827
1151	NR1D2	ENSG00000174738	115.355	1.01675	0.0408669
1152	PDK2	ENSG00000005882	586.007	0.489862	0.0409189
1153	FRG1JP	ENSG00000307942	21.9102	1.587	0.0409303
1154	OMG	ENSG00000126861	8.687	1.48622	0.0410298
1155	LINC02701	ENSG00000250508	11.2209	1.15465	0.0410298
1156	SVEP1	ENSG00000165124	3276.54	0.585761	0.0410643
1157	―	ENSG00000291054	22.8176	0.884314	0.0413875
1158	B4GAT1	ENSG00000174684	381.962	0.44457	0.0414768
1159	ZNF571	ENSG00000180479	17.3698	0.909607	0.0414768
1160	PCDHGB6	ENSG00000253305	31.5635	1.47238	0.0416928
1161	GLTC1	ENSG00000255306	4.984	1.92407	0.042225
1162	SPRY1	ENSG00000164056	129.197	0.90151	0.042496
1163	MARF1	ENSG00000166783	479.554	0.647458	0.0424996
1164	JMY	ENSG00000152409	73.8108	1.0903	0.0425056
1165	FBXO41	ENSG00000163013	125.208	0.454457	0.0426175
1166	MMP1	ENSG00000196611	4320.98	0.437557	0.04263
1167	ALG6	ENSG00000088035	73.6203	0.938355	0.0426363
1168	SLX4IP	ENSG00000149346	80.2437	0.793237	0.0426376
1169	LRFN5	ENSG00000165379	121.671	0.646187	0.04264
1170	NBR2	ENSG00000198496	48.1611	0.632795	0.04264
1171	BRD3OS	ENSG00000235106	511.054	0.278419	0.0428499
1172	MAGEE1	ENSG00000198934	21.2352	1.22246	0.0432644
1173	―	ENSG00000284773	27.0194	1.12855	0.0432857
1174	FAM117A	ENSG00000121104	65.5118	0.620128	0.0434277
1175	ZNF10	ENSG00000256223	99.4167	0.675245	0.0435567
1176	UVSSA	ENSG00000163945	319.739	0.383036	0.0437243
1177	SPACA9	ENSG00000165698	103.551	0.514485	0.0437828
1178	COL8A1	ENSG00000144810	1714.39	0.59414	0.0438305
1179	B4GALT6	ENSG00000118276	56.483	1.17465	0.0439129
1180	NPC2	ENSG00000119655	3659.24	0.59882	0.0439129
1181	―	ENSG00000124593	129.754	0.389621	0.0439129
1182	DENND2D	ENSG00000162777	94.6394	0.453714	0.0439129
1183	ZBTB43	ENSG00000169155	143.449	0.685073	0.0439129
1184	―	ENSG00000294583	5.31423	1.46158	0.0439129
1185	PIP4K2A	ENSG00000150867	585.944	0.369482	0.0439983
1186	RABGAP1	ENSG00000011454	592.616	0.359041	0.0440377
1187	PLEKHG4B	ENSG00000153404	13.9864	1.06466	0.0440448
1188	ZFP14	ENSG00000142065	33.518	0.992149	0.0440613
1189	TSTD1	ENSG00000215845	109.989	0.699661	0.0442798
1190	LUZP2	ENSG00000187398	8.49919	4.14927	0.0444123
1191	TSPAN15	ENSG00000099282	187.335	0.606402	0.0445286
1192	―	ENSG00000306073	12.573	1.02954	0.0445286
1193	ZNF667	ENSG00000198046	58.4812	0.505425	0.0446964
1194	FILNC1	ENSG00000231426	7.27386	1.70167	0.044757
1195	THRA	ENSG00000126351	574.851	0.341625	0.0447685
1196	DNAI3	ENSG00000162643	113.456	0.636411	0.0449013
1197	EPM2A-DT	ENSG00000235652	36.7964	0.784503	0.0449817
1198	ZFP90	ENSG00000184939	387.104	0.285355	0.045169
1199	LINC02739	ENSG00000255008	4.67212	2.29494	0.045169
1200	GPR65	ENSG00000140030	8.20738	1.68292	0.0452133
1201	EPHX1	ENSG00000143819	1098.91	0.57275	0.0452133
1202	GOLGA8R	ENSG00000186399	34.8941	1.70205	0.0452322
1203	MAP3K2-DT	ENSG00000236682	32.9466	0.853545	0.0454621
1204	MLLT6	ENSG00000275023	893.715	0.347724	0.0455937
1205	GSAP	ENSG00000186088	68.4637	0.834977	0.0456744
1206	SAMD9	ENSG00000205413	305.269	0.995044	0.0457314
1207	PLD3	ENSG00000105223	7845.73	0.591558	0.0457398
1208	OLFML1	ENSG00000183801	93.9468	0.494518	0.0458243
1209	C14orf132	ENSG00000227051	722.642	0.46435	0.0460403
1210	―	ENSG00000286024	11.7737	1.8661	0.0462178
1211	SH3BP5	ENSG00000131370	194.176	0.584931	0.0465916
1212	STEAP1B-AS1	ENSG00000232759	3.98493	2.14793	0.0465916
1213	MRNIP	ENSG00000161010	454.346	0.37772	0.0466018
1214	MAPK10	ENSG00000109339	61.3596	0.552794	0.046756
1215	ZNF397	ENSG00000186812	189.696	0.41909	0.046756
1216	ZNF514	ENSG00000144026	240.005	0.303444	0.0467725
1217	PCDHGB1	ENSG00000254221	15.8654	1.53172	0.0469509
1218	LRRK2	ENSG00000188906	70.1274	1.27073	0.0469539
1219	TSPYL2	ENSG00000184205	2424.48	0.546042	0.0469736
1220	ZNF493	ENSG00000196268	38.5919	1.00411	0.0469856
1221	ZMYND15	ENSG00000141497	11.5178	1.10919	0.0470765
1222	STAG3L4	ENSG00000106610	12.6644	2.65746	0.0470858
1223	SEMA3D	ENSG00000153993	23.7976	1.54922	0.0470978
1224	CLDN18	ENSG00000066405	4.04925	2.47597	0.0471791
1225	SNHG14	ENSG00000224078	616.832	0.844372	0.0471791
1226	―	ENSG00000291143	5.27105	2.42135	0.0476378
1227	WLS	ENSG00000116729	5918.23	0.466813	0.0476534
1228	SYT15	ENSG00000204176	6.39399	1.56747	0.0476534
1229	GOLGB1	ENSG00000173230	1237.98	0.215099	0.0476858
1230	NUDT7	ENSG00000140876	35.9495	0.615075	0.0481344
1231	―	ENSG00000226965	10.5617	1.15875	0.0481686
1232	LTBP1	ENSG00000049323	1175.37	0.986619	0.0487973
1233	ABHD14A	ENSG00000248487	200.556	0.693823	0.049115
1234	―	ENSG00000272491	5.30075	1.70978	0.049115
1235	TAPBP	ENSG00000231925	2243.7	0.711157	0.0493103
1236	CRELD1	ENSG00000163703	795.348	0.491912	0.0493182
1237	SLC46A1	ENSG00000076351	229.487	0.385129	0.0493505
1238	KCNS2	ENSG00000156486	78.638	0.71307	0.0495051
1239	GPLD1	ENSG00000112293	4.88211	2.6818	0.0495384
	DEGs were identified using PyDESeq2. baseMean represents the normalized mean expression across all samples as calculated by PyDESeq2. log2FoldChange and padj were calculated using the Wald test with Benjamini–Hochberg correction. DEGs were filtered using padj < 0.05. No log2FC threshold was applied. Gene symbols marked as “—” indicate entries for which Ensembl gene IDs were identified, but for wh…
	A, B: DEGs between young and middle NHDFs. A: upregulated in the middle group; B: downregulated in the middle group.
	C, D: DEGs between middle and old NHDFs. C: upregulated in the old group; D: downregulated in the old group.
	E, F: DEGs between young and old NHDFs. E: upregulated in the old group; F: downregulated in the old group.

## Sheet: YvsM(M↓)
	Supplementary Table S4B.
	DEGs in NHDFs (padj < 0.05).
	Gene name	Ensembl ID	baseMean	log2FC	padj
1	PTGS1	ENSG00000095303	1893.62	-2.19054	7.7e-130
2	PLAU	ENSG00000122861	3931.71	-1.89672	2.04e-75
3	TPX2	ENSG00000088325	708.653	-1.40267	1.09e-55
4	SPAG5	ENSG00000076382	320.479	-1.53521	4.59e-47
5	KIFC1	ENSG00000237649	227.858	-1.73234	4.09e-45
6	NPTX2	ENSG00000106236	66.0365	-7.34874	1.79e-39
7	TCF19	ENSG00000137310	326.429	-1.20765	1.92e-36
8	SLC37A2	ENSG00000134955	61.9682	-2.30566	3.85e-36
9	KIF4A	ENSG00000090889	184.976	-1.53785	1.06e-35
10	PFKP	ENSG00000067057	544.824	-1.2594	1.6e-32
11	CCNB2	ENSG00000157456	268.797	-1.52202	4.84e-31
12	ANOS1	ENSG00000011201	48.2312	-3.24036	1.63e-28
13	LAMC3	ENSG00000050555	63.3507	-2.27781	1.61e-27
14	IQGAP3	ENSG00000183856	428.207	-1.5106	1.41e-26
15	PEAR1	ENSG00000187800	49.9518	-4.38159	1.56e-26
16	SLC7A5	ENSG00000103257	1624.7	-1.32676	7.07e-26
17	STXBP6	ENSG00000168952	112.854	-1.87091	7.84e-26
18	CNIH3	ENSG00000143786	80.299	-1.855	1.08e-25
19	RRM2	ENSG00000171848	763.932	-1.54707	2.11e-25
20	PRC1	ENSG00000198901	595.666	-1.27984	9.69e-25
21	HNRNPAB	ENSG00000197451	1338.61	-0.759717	1.03e-24
22	SFRP2	ENSG00000145423	54.6337	-7.13795	1.71e-23
23	MCAM	ENSG00000076706	93.1403	-1.39503	1.95e-22
24	CDC20	ENSG00000117399	345.944	-1.70975	4.63e-22
25	TYMS	ENSG00000176890	946.067	-1.0465	1.08e-21
26	UBE2C	ENSG00000175063	349.053	-1.69394	5.36e-21
27	MMP3	ENSG00000149968	2104.82	-1.59621	1.17e-20
28	HJURP	ENSG00000123485	206.193	-1.39983	1.43e-20
29	PIMREG	ENSG00000129195	143.647	-1.74328	1.9e-20
30	NSG1	ENSG00000168824	77.3957	-2.09247	3.86e-20
31	GTSE1	ENSG00000075218	161.136	-1.74259	3.71e-19
32	CDCA5	ENSG00000146670	509.241	-1.52263	3.78e-19
33	CCNB1	ENSG00000134057	691.145	-1.33924	1.01e-18
34	CDH4	ENSG00000179242	52.379	-2.77864	1.22e-18
35	TUBB6	ENSG00000176014	5433.63	-0.995148	1.87e-18
36	KIF18B	ENSG00000186185	180.173	-1.66709	2.93e-18
37	CDC6	ENSG00000094804	238.416	-1.1623	3.04e-18
38	COL5A3	ENSG00000080573	2802.53	-1.27143	4.25e-18
39	SEMA7A	ENSG00000138623	1024.69	-0.980698	5.85e-18
40	NTNG1	ENSG00000162631	22.7176	-2.77205	4.09e-17
41	FOXM1	ENSG00000111206	616.708	-1.46484	5.6e-17
42	SMS	ENSG00000102172	579.089	-1.09915	5.61e-17
43	RGS20	ENSG00000147509	81.1525	-1.853	7.29e-17
44	APOBEC3B	ENSG00000179750	145.585	-1.38884	1.26e-16
45	CDCA2	ENSG00000184661	96.4647	-1.56477	1.27e-16
46	TRIP13	ENSG00000071539	198.941	-1.5134	4.66e-16
47	SKA1	ENSG00000154839	81.97	-1.82594	5.06e-16
48	TSPAN14	ENSG00000108219	1289.12	-0.859802	5.7e-16
49	NQO1	ENSG00000181019	9003.37	-1.31829	1.37e-15
50	NCAPH	ENSG00000121152	96.217	-1.68768	1.51e-15
51	TUBA1C	ENSG00000167553	5189.04	-0.812668	1.79e-15
52	KNSTRN	ENSG00000128944	212.369	-1.00965	2.21e-15
53	CDKN3	ENSG00000100526	128.196	-1.60953	2.5e-15
54	CHST2	ENSG00000175040	397.524	-0.742226	4.31e-15
55	KIF26A	ENSG00000066735	33.0368	-2.96524	5.06e-15
56	RGS4	ENSG00000117152	44.7377	-2.34499	6.17e-15
57	CHAF1B	ENSG00000159259	144.08	-0.999585	8.93e-15
58	CDC45	ENSG00000093009	140.114	-1.46518	9.44e-15
59	TPM1	ENSG00000140416	3965.97	-0.86478	2.4e-14
60	KRT34	ENSG00000131737	60.5428	-1.84087	3.1e-14
61	PTPRN	ENSG00000054356	32.3894	-3.27782	4.7e-14
62	―	ENSG00000261786	108.825	-1.92723	5.83e-14
63	CTPS1	ENSG00000171793	682.951	-0.894906	7.38e-14
64	CHAF1A	ENSG00000167670	253.297	-0.944543	1.23e-13
65	TOX2	ENSG00000124191	125.353	-1.52121	1.53e-13
66	ABLIM3	ENSG00000173210	1760.06	-1.02544	1.59e-13
67	FANCA	ENSG00000187741	327.207	-0.987853	2.03e-13
68	ZWINT	ENSG00000122952	219.745	-1.21593	2.12e-13
69	MKI67	ENSG00000148773	674.838	-1.58867	3.59e-13
70	FANCI	ENSG00000140525	319.176	-1.07245	3.92e-13
71	MYBL2	ENSG00000101057	405.225	-1.92617	4.55e-13
72	PREX1	ENSG00000124126	85.0832	-1.79583	5.5e-13
73	CDC25C	ENSG00000158402	52.5636	-1.89545	8.88e-13
74	GARS1	ENSG00000106105	3005.83	-0.631738	1.66e-12
75	FLNB	ENSG00000136068	802.562	-1.14753	1.66e-12
76	KIF2C	ENSG00000142945	355.108	-1.46262	2.98e-12
77	SKA3	ENSG00000165480	112.46	-1.54139	3.21e-12
78	SAPCD2	ENSG00000186193	54.4048	-1.90331	3.72e-12
79	HSPA2	ENSG00000126803	274.152	-1.11478	4.15e-12
80	FUS	ENSG00000089280	3641.06	-0.637551	5.74e-12
81	ITGA8	ENSG00000077943	40.9674	-2.30908	7.01e-12
82	LY6K	ENSG00000160886	276.412	-2.28472	7.73e-12
83	UHRF1	ENSG00000276043	455.12	-0.914368	8.85e-12
84	TBC1D1	ENSG00000065882	519.022	-0.816797	1.09e-11
85	LMNB2	ENSG00000176619	1555.94	-0.622571	1.15e-11
86	AURKA	ENSG00000087586	785.714	-0.974369	1.47e-11
87	HBEGF	ENSG00000113070	74.1015	-1.3143	1.91e-11
88	EXO1	ENSG00000174371	83.6891	-1.36597	2.53e-11
89	EDN1	ENSG00000078401	18.1861	-3.17758	3.19e-11
90	AFAP1L1	ENSG00000157510	96.2959	-1.34979	3.44e-11
91	KIF20A	ENSG00000112984	298.766	-1.3195	3.89e-11
92	PVR	ENSG00000073008	1628.07	-0.957931	4.6e-11
93	CD163L1	ENSG00000177675	214.914	-1.14605	6.73e-11
94	PODXL	ENSG00000128567	17.0196	-2.31428	6.8e-11
95	CDCA8	ENSG00000134690	241.297	-1.37392	7.26e-11
96	PSMC3IP	ENSG00000131470	109.413	-1.23561	7.83e-11
97	PUM3	ENSG00000080608	320.136	-0.87858	1.69e-10
98	INSC	ENSG00000188487	110.291	-2.6387	1.72e-10
99	TUBA1B	ENSG00000123416	15813.5	-0.927812	2.16e-10
100	HNRNPM	ENSG00000099783	2001.73	-0.650607	2.4e-10
101	RAD54L	ENSG00000085999	126.005	-1.04488	2.72e-10
102	FEN1	ENSG00000168496	563.884	-0.997804	2.89e-10
103	BUB1B	ENSG00000156970	126.817	-1.41829	3.09e-10
104	PLK1	ENSG00000166851	377.697	-1.38197	3.36e-10
105	RAD51	ENSG00000051180	107.73	-1.33524	3.57e-10
106	CCT2	ENSG00000166226	1567.42	-0.660447	4.01e-10
107	SCN5A	ENSG00000183873	33.0665	-2.37249	4.45e-10
108	HTRA3	ENSG00000170801	49.7789	-2.33999	4.98e-10
109	KHDRBS3	ENSG00000131773	198.821	-0.905455	5.63e-10
110	MSANTD3	ENSG00000066697	556.53	-0.670933	6.78e-10
111	SNRPA1	ENSG00000131876	291.145	-0.817243	7.39e-10
112	ACAT2	ENSG00000120437	1598.2	-0.752461	7.43e-10
113	CDC25A	ENSG00000164045	134.868	-1.24257	9.09e-10
114	PNP	ENSG00000198805	514.885	-1.07636	9.44e-10
115	WDR1	ENSG00000071127	7409.92	-0.527492	9.76e-10
116	SCARA3	ENSG00000168077	248.712	-1.23388	1.03e-09
117	MFAP5	ENSG00000197614	26.7047	-5.16636	1.09e-09
118	TGFBI	ENSG00000120708	677.667	-1.43786	1.63e-09
119	GRPEL1	ENSG00000109519	471.856	-0.838837	2.13e-09
120	DKC1	ENSG00000130826	551.903	-0.630392	2.26e-09
121	JPT2	ENSG00000206053	944.532	-0.678601	2.3e-09
122	NCAPG	ENSG00000109805	205.47	-1.37479	2.36e-09
123	HNRNPA1	ENSG00000135486	5654.46	-0.601048	2.55e-09
124	ESPL1	ENSG00000135476	178.14	-1.02095	3.29e-09
125	KISS1	ENSG00000170498	51.9122	-2.47306	3.41e-09
126	SH2D4A	ENSG00000104611	275.64	-0.773991	3.46e-09
127	ZPR1	ENSG00000109917	651.029	-0.649204	3.65e-09
128	FGF1	ENSG00000113578	86.151	-1.19569	3.75e-09
129	CD274	ENSG00000120217	134.064	-1.5264	3.91e-09
130	BIRC5	ENSG00000089685	604.832	-1.67102	3.93e-09
131	LRRC59	ENSG00000108829	2825.64	-0.555939	4.15e-09
132	CABLES1	ENSG00000134508	32.4298	-1.7134	4.18e-09
133	FOXD1	ENSG00000251493	70.7606	-1.31451	5.34e-09
134	TFPI2	ENSG00000105825	702.364	-1.57683	5.65e-09
135	SHISA9	ENSG00000237515	18.5891	-2.87284	6e-09
136	ADRB2	ENSG00000169252	45.8882	-2.07071	6.06e-09
137	AURKB	ENSG00000178999	243.309	-1.61327	6.15e-09
138	FST	ENSG00000134363	438.024	-1.24878	7.42e-09
139	KRT7	ENSG00000135480	75.5229	-1.86823	8.28e-09
140	DTL	ENSG00000143476	213.125	-1.02966	8.7e-09
141	DLGAP5	ENSG00000126787	152.721	-1.44932	9.36e-09
142	HS3ST3A1	ENSG00000153976	139.087	-0.934489	9.36e-09
143	BZW2	ENSG00000136261	765.204	-0.794357	1.05e-08
144	CDKN2C	ENSG00000123080	183.329	-0.855092	1.13e-08
145	KRT18	ENSG00000111057	222.364	-1.74176	1.23e-08
146	APCDD1L	ENSG00000198768	46.6288	-1.52262	1.25e-08
147	CDCA4	ENSG00000170779	217.859	-0.911828	1.61e-08
148	NLRP1	ENSG00000091592	191.216	-1.13682	1.67e-08
149	ULBP2	ENSG00000131015	35.4324	-1.45701	1.73e-08
150	IL11	ENSG00000095752	57.5901	-1.65326	1.77e-08
151	BUB1	ENSG00000169679	191.182	-1.29694	2.01e-08
152	TRBC2	ENSG00000211772	144.059	-2.25626	2.03e-08
153	GMNN	ENSG00000112312	96.6966	-1.35806	2.36e-08
154	CCNF	ENSG00000162063	167.464	-1.15511	2.54e-08
155	ADK	ENSG00000156110	361.784	-0.927148	2.69e-08
156	TACC3	ENSG00000013810	698.825	-1.48886	2.89e-08
157	DDX10	ENSG00000178105	389.287	-0.62825	2.91e-08
158	NOP16	ENSG00000048162	274.076	-0.955271	3.21e-08
159	CDCA3	ENSG00000111665	269.929	-1.14916	3.82e-08
160	SNCAIP	ENSG00000064692	46.0343	-1.71539	3.9e-08
161	VAT1L	ENSG00000171724	107.295	-1.38723	3.96e-08
162	EZH2	ENSG00000106462	196.972	-1.01004	4.27e-08
163	ECHDC3	ENSG00000134463	31.7918	-1.45998	4.74e-08
164	COLEC12	ENSG00000158270	129.187	-1.72865	5.7e-08
165	PHF19	ENSG00000119403	486.053	-0.876973	5.7e-08
166	CLEC14A	ENSG00000176435	26.5094	-1.45917	5.93e-08
167	RELT	ENSG00000054967	127.338	-0.956925	5.99e-08
168	TROAP	ENSG00000135451	217.787	-1.23068	7.9e-08
169	NCL	ENSG00000115053	4818.43	-0.579726	8.26e-08
170	CRABP2	ENSG00000143320	1858.27	-1.22153	8.64e-08
171	PTTG1	ENSG00000164611	556.816	-1.58314	1.02e-07
172	ANKRD1	ENSG00000148677	13.1626	-3.05995	1.04e-07
173	GOT1	ENSG00000120053	617.365	-0.717256	1.06e-07
174	HMGB2	ENSG00000164104	385.053	-1.38736	1.09e-07
175	MCM2	ENSG00000073111	296.42	-0.783352	1.11e-07
176	ARHGAP22	ENSG00000128805	451.896	-1.38003	1.4e-07
177	NDN	ENSG00000182636	98.5494	-1.20242	1.45e-07
178	ORC1	ENSG00000085840	56.0881	-1.12375	1.51e-07
179	PFKFB4	ENSG00000114268	388.828	-1.22194	1.51e-07
180	CBS	ENSG00000160200	818.546	-0.891749	1.56e-07
181	CENPA	ENSG00000115163	83.3958	-1.25034	1.84e-07
182	FKBP4	ENSG00000004478	724.516	-0.524993	1.97e-07
183	WDR62	ENSG00000075702	271.397	-1.58932	1.97e-07
184	DUSP5	ENSG00000138166	1178.35	-0.6887	2.13e-07
185	GNL2	ENSG00000134697	675.335	-0.653432	2.14e-07
186	CCT4	ENSG00000115484	1928.48	-0.506183	2.19e-07
187	ADAMTS15	ENSG00000166106	12.7762	-2.35429	2.19e-07
188	CNDP2	ENSG00000133313	1033.06	-0.516332	2.27e-07
189	MCM5	ENSG00000100297	569.244	-1.09313	2.56e-07
190	MCM3	ENSG00000112118	526.883	-0.634784	2.63e-07
191	F3	ENSG00000117525	1514.16	-1.58046	2.69e-07
192	SH2D5	ENSG00000189410	309.517	-1.08366	2.83e-07
193	UCK2	ENSG00000143179	1158.73	-0.529	2.97e-07
194	PKN3	ENSG00000160447	73.3502	-1.14344	2.97e-07
195	PTPRF	ENSG00000142949	919.409	-0.925151	3.19e-07
196	CENPU	ENSG00000151725	163.031	-1.23633	3.37e-07
197	ICOSLG	ENSG00000160223	119.771	-1.15569	3.43e-07
198	SPDL1	ENSG00000040275	155.604	-1.25566	3.58e-07
199	GPATCH4	ENSG00000160818	265.48	-0.959451	3.62e-07
200	VIPR1	ENSG00000114812	11.6369	-4.61193	3.7e-07
201	WWC1	ENSG00000113645	17.811	-1.9942	3.73e-07
202	INMT	ENSG00000241644	103.714	-1.82482	3.82e-07
203	HSPA8	ENSG00000109971	17041.2	-0.472871	4.02e-07
204	TRIM7	ENSG00000146054	30.3603	-1.52882	4.06e-07
205	BYSL	ENSG00000112578	294.165	-0.902684	4.6e-07
206	FHOD3	ENSG00000134775	258.002	-1.24064	4.6e-07
207	TIMELESS	ENSG00000111602	320.427	-0.711721	4.85e-07
208	MRPL15	ENSG00000137547	471.723	-0.709382	4.85e-07
209	CXCL1	ENSG00000163739	287.533	-0.906234	4.89e-07
210	HOXD13	ENSG00000128714	64.1907	-1.42539	5.09e-07
211	ODC1	ENSG00000115758	1836.68	-0.768558	5.49e-07
212	CARS1	ENSG00000110619	1019.26	-0.96159	5.87e-07
213	DENND2A	ENSG00000146966	1644.25	-0.850038	6.04e-07
214	CENPF	ENSG00000117724	298.109	-1.24592	6.31e-07
215	RACGAP1	ENSG00000161800	370.255	-1.0579	6.48e-07
216	EPHB1	ENSG00000154928	6.18587	-3.57322	7.19e-07
217	PLEK2	ENSG00000100558	24.0745	-1.59992	7.69e-07
218	GINS2	ENSG00000131153	175.889	-1.48917	7.84e-07
219	CMSS1	ENSG00000184220	115.695	-0.881524	8.03e-07
220	CSMD2	ENSG00000121904	104.177	-1.61479	8.58e-07
221	EWSR1	ENSG00000182944	2747.92	-0.405646	8.69e-07
222	KPNA2	ENSG00000182481	2725.93	-0.764943	8.82e-07
223	YWHAH	ENSG00000128245	1502.62	-0.503351	9.25e-07
224	UBE2T	ENSG00000077152	135.91	-1.06682	1.02e-06
225	LZTS1	ENSG00000061337	13.0928	-1.9979	1.35e-06
226	WDFY2	ENSG00000139668	168.726	-0.935282	1.54e-06
227	RFLNB	ENSG00000183688	505.308	-0.593137	1.74e-06
228	YARS1	ENSG00000134684	1942.11	-0.700291	1.85e-06
229	DDIT4L	ENSG00000145358	105.073	-1.38839	1.89e-06
230	TFAP2C	ENSG00000087510	838.627	-0.691375	1.92e-06
231	NRGN	ENSG00000154146	116.37	-2.4295	2.01e-06
232	EXOSC2	ENSG00000130713	281.207	-0.842348	2.09e-06
233	NUF2	ENSG00000143228	50.1799	-1.70512	2.23e-06
234	CLSPN	ENSG00000092853	142.219	-1.11496	2.32e-06
235	TK1	ENSG00000167900	583.228	-1.31997	2.4e-06
236	SLC43A3	ENSG00000134802	470.269	-0.623046	2.42e-06
237	ANAPC7	ENSG00000196510	760.264	-0.488573	2.68e-06
238	FAM83D	ENSG00000101447	130.086	-1.36444	2.69e-06
239	TRNP1	ENSG00000253368	5650.86	-0.639142	2.78e-06
240	CCK	ENSG00000187094	6.47244	-5.34854	2.85e-06
241	SHCBP1	ENSG00000171241	190.138	-1.41387	2.94e-06
242	RAN	ENSG00000132341	4162.98	-0.567803	3.16e-06
243	AIMP2	ENSG00000106305	194.857	-0.830315	3.2e-06
244	GINS1	ENSG00000101003	94.5733	-0.867012	3.38e-06
245	MARS1	ENSG00000166986	1655.35	-0.584914	3.39e-06
246	SHMT1	ENSG00000176974	115.656	-0.842496	3.65e-06
247	DDIAS	ENSG00000165490	33.6203	-1.44875	3.81e-06
248	MEOX1	ENSG00000005102	140.449	-0.767573	4.01e-06
249	RFC4	ENSG00000163918	127.607	-1.01524	4.06e-06
250	CENPI	ENSG00000102384	121.575	-0.957494	4.15e-06
251	UTP6	ENSG00000108651	391.511	-0.596549	4.15e-06
252	NAGS	ENSG00000161653	48.8875	-1.31762	4.41e-06
253	NEURL1B	ENSG00000214357	163.888	-0.698318	4.83e-06
254	PLAC9P1	ENSG00000291116	11.4843	-4.07861	5.14e-06
255	MATN2	ENSG00000132561	12.2855	-2.04825	5.34e-06
256	MTHFD1L	ENSG00000120254	779.03	-0.385023	5.35e-06
257	FJX1	ENSG00000179431	328.267	-0.756027	5.61e-06
258	TRAC	ENSG00000277734	19.9844	-2.06163	5.88e-06
259	GINS3	ENSG00000181938	60.3798	-0.911426	6.75e-06
260	NOP58	ENSG00000055044	425.346	-0.750528	7.22e-06
261	MCM10	ENSG00000065328	55.6842	-1.49914	7.36e-06
262	KIF22	ENSG00000079616	417.705	-1.23238	7.65e-06
263	TOE1	ENSG00000132773	138.765	-0.755566	7.97e-06
264	METTL13	ENSG00000010165	670.632	-0.335917	8.26e-06
265	PARP1	ENSG00000143799	981.712	-0.52088	8.35e-06
266	DNMT1	ENSG00000130816	875.349	-0.759129	8.42e-06
267	SYBU	ENSG00000147642	43.5646	-1.66955	8.82e-06
268	TICRR	ENSG00000140534	110.818	-0.966755	9.09e-06
269	AQP1	ENSG00000240583	891.403	-0.690335	9.38e-06
270	GTPBP4	ENSG00000107937	783.965	-0.611668	9.55e-06
271	MCM7	ENSG00000166508	1367.61	-1.18991	9.56e-06
272	CENPO	ENSG00000138092	458.215	-0.69125	9.64e-06
273	ASF1B	ENSG00000105011	269.866	-0.943606	1.01e-05
274	PBK	ENSG00000168078	143.154	-1.40384	1.02e-05
275	OIP5	ENSG00000104147	26.8284	-1.53338	1.07e-05
276	ITPKA	ENSG00000137825	60.3246	-1.49864	1.09e-05
277	DAPK2	ENSG00000035664	108.988	-0.90189	1.11e-05
278	DNAJC9	ENSG00000213551	350.637	-0.712322	1.16e-05
279	LYAR	ENSG00000145220	97.509	-0.987762	1.17e-05
280	GDF6	ENSG00000156466	41.8169	-2.54815	1.27e-05
281	YWHAE	ENSG00000108953	5298.18	-0.46059	1.28e-05
282	STC2	ENSG00000113739	4337.71	-0.450134	1.36e-05
283	PLXNA2	ENSG00000076356	112.667	-1.10943	1.37e-05
284	HASPIN	ENSG00000177602	27.2851	-1.47637	1.37e-05
285	NDC80	ENSG00000080986	103.178	-1.44661	1.37e-05
286	FAM167A	ENSG00000154319	480.492	-0.942361	1.41e-05
287	CEBPG	ENSG00000153879	234.802	-0.688667	1.43e-05
288	PACSIN2	ENSG00000100266	641.64	-0.391871	1.59e-05
289	FTSJ1	ENSG00000068438	430.053	-0.523416	1.61e-05
290	TPM3	ENSG00000143549	5229.67	-0.457241	1.61e-05
291	CRIP1	ENSG00000213145	391.302	-2.32013	1.61e-05
292	POLR1E	ENSG00000137054	327.815	-0.798238	1.62e-05
293	EME1	ENSG00000154920	44.1044	-0.98303	1.62e-05
294	UACA	ENSG00000137831	1213.75	-0.70406	1.63e-05
295	LOXL2	ENSG00000134013	9800.41	-0.578266	1.65e-05
296	EIF5B	ENSG00000158417	1503.02	-0.571412	1.66e-05
297	PDSS1	ENSG00000148459	31.8037	-1.08488	1.69e-05
298	PLK2	ENSG00000145632	647.142	-0.745011	1.71e-05
299	EXT1	ENSG00000182197	1844.76	-0.474904	1.76e-05
300	NOP56	ENSG00000101361	1273.97	-0.734322	1.78e-05
301	GADD45A	ENSG00000116717	888.476	-0.7534	1.79e-05
302	―	ENSG00000291105	119.815	-1.37126	1.8e-05
303	CCT5	ENSG00000150753	1942.2	-0.679038	1.83e-05
304	ASNS	ENSG00000070669	572.758	-1.20248	1.96e-05
305	GPRC5A	ENSG00000013588	1219.62	-0.523895	2.12e-05
306	SLC1A5	ENSG00000105281	3910.7	-0.626954	2.16e-05
307	CXCL8	ENSG00000169429	282.16	-2.02304	2.26e-05
308	TBRG4	ENSG00000136270	560.93	-0.765833	2.3e-05
309	HBA1	ENSG00000206172	19.4105	-3.17566	2.35e-05
310	LANCL2	ENSG00000132434	219.657	-0.470574	2.36e-05
311	TENT5B	ENSG00000158246	44.5039	-1.35971	2.36e-05
312	GNL3	ENSG00000163938	577.223	-0.531734	2.69e-05
313	MYO19	ENSG00000278259	515.304	-0.507067	2.98e-05
314	PLAUR	ENSG00000011422	769.901	-0.776125	3.24e-05
315	DNAJC2	ENSG00000105821	211.971	-0.754535	3.26e-05
316	CNRIP1	ENSG00000119865	615.278	-0.492808	3.28e-05
317	CCDC81	ENSG00000149201	89.9452	-1.04646	3.3e-05
318	SPOCD1	ENSG00000134668	1356.32	-1.06809	3.39e-05
319	SSRP1	ENSG00000149136	1492.71	-0.569585	3.42e-05
320	LMNB1	ENSG00000113368	188.923	-1.27683	3.46e-05
321	TM4SF1	ENSG00000169908	143.264	-0.977135	3.57e-05
322	TNFAIP2	ENSG00000185215	376.06	-0.555724	4.14e-05
323	ATP2A3	ENSG00000074370	43.0256	-1.42666	4.21e-05
324	SWINGN	ENSG00000260910	187.248	-0.597081	4.22e-05
325	PRR11	ENSG00000068489	250.8	-0.939459	4.26e-05
326	CENPM	ENSG00000100162	130.47	-1.43105	4.31e-05
327	MELK	ENSG00000165304	226.934	-1.00152	4.51e-05
328	GLRX3	ENSG00000108010	622.602	-0.515417	4.52e-05
329	FAM216A	ENSG00000204856	130.375	-0.815392	4.55e-05
330	CCT6A	ENSG00000146731	1489.56	-0.554657	4.64e-05
331	ZNF185	ENSG00000147394	54.5874	-1.38165	4.79e-05
332	WNK4	ENSG00000126562	74.2203	-1.3656	5e-05
333	FIRRM	ENSG00000000460	86.634	-0.913897	5.02e-05
334	TWNK	ENSG00000107815	97.2885	-0.739108	5.02e-05
335	FABP5	ENSG00000164687	133.831	-1.36721	5.03e-05
336	TUBB4B	ENSG00000188229	6205.7	-0.969494	5.11e-05
337	MND1	ENSG00000121211	23.9103	-1.34878	5.42e-05
338	FANCD2	ENSG00000144554	101.981	-0.79925	5.47e-05
339	BLM	ENSG00000197299	35.7878	-1.21664	5.47e-05
340	AARS1	ENSG00000090861	2094.15	-0.549571	5.56e-05
341	―	ENSG00000259316	46.0129	-1.36459	5.67e-05
342	COTL1	ENSG00000103187	5998.58	-0.813194	5.74e-05
343	PCK2	ENSG00000100889	407.15	-0.76832	5.77e-05
344	SEPHS1	ENSG00000086475	268.99	-0.478812	5.8e-05
345	SLC35F3	ENSG00000183780	5.34208	-2.83716	5.89e-05
346	ACOT9	ENSG00000123130	701.572	-0.555032	6.18e-05
347	KCNG1	ENSG00000026559	21.2672	-1.49654	6.43e-05
348	ERFE	ENSG00000178752	15.1439	-1.99884	6.5e-05
349	NSMCE4A	ENSG00000107672	189.887	-0.673894	7.06e-05
350	IMMT	ENSG00000132305	911.977	-0.417918	7.13e-05
351	STK10	ENSG00000072786	1097.35	-0.599622	7.77e-05
352	CEP55	ENSG00000138180	186.157	-1.1607	7.99e-05
353	POP1	ENSG00000104356	104.435	-0.736761	8.02e-05
354	COPS3	ENSG00000141030	628.252	-0.543666	8.29e-05
355	SNHG1	ENSG00000255717	597.597	-0.794619	8.39e-05
356	CCNA2	ENSG00000145386	167.852	-1.29924	8.65e-05
357	OSTF1	ENSG00000134996	319.014	-0.505354	8.97e-05
358	ILF2	ENSG00000143621	2074.87	-0.518468	9.22e-05
359	TUBB	ENSG00000196230	20367.8	-0.648582	9.36e-05
360	A4GALT	ENSG00000128274	12.9187	-1.82886	9.37e-05
361	LTK	ENSG00000062524	31.7923	-1.50122	9.53e-05
362	NASP	ENSG00000132780	690.036	-0.654126	9.82e-05
363	TRIM16	ENSG00000221926	788.233	-0.457405	9.82e-05
364	TUBA4A	ENSG00000127824	404.692	-0.993259	9.96e-05
365	EZR	ENSG00000092820	832.055	-1.0486	0.000102638
366	ARHGAP10	ENSG00000071205	871.72	-0.463193	0.0001033
367	SPC25	ENSG00000152253	36.3932	-1.4401	0.000104748
368	DUSP15	ENSG00000149599	23.7115	-3.01442	0.000105093
369	ZNF536	ENSG00000198597	7.87434	-7.08305	0.000108984
370	EXOSC9	ENSG00000123737	275.242	-0.763384	0.000114934
371	―	ENSG00000266709	16.9387	-1.57536	0.000119419
372	CCT7	ENSG00000135624	2713.36	-0.681168	0.000120583
373	ADRA1D	ENSG00000171873	40.0813	-1.06572	0.000123892
374	EXOSC10	ENSG00000171824	666.424	-0.440842	0.000124014
375	CD9	ENSG00000010278	1655.26	-0.748113	0.000124397
376	REN	ENSG00000143839	9.42798	-6.36201	0.000129213
377	PTBP1	ENSG00000011304	2767.16	-0.410965	0.000129947
378	PLEKHN1	ENSG00000187583	118.599	-1.11153	0.000136902
379	C1QBP	ENSG00000108561	1027.98	-0.63565	0.000137854
380	PITPNB	ENSG00000180957	944.13	-0.503438	0.000141359
381	CKS1B	ENSG00000173207	411.689	-1.0299	0.000143787
382	PKMYT1	ENSG00000127564	427.839	-1.38984	0.000149846
383	CENPN	ENSG00000166451	217.853	-0.849886	0.00015294
384	EHD1	ENSG00000110047	2981.45	-0.838635	0.000162056
385	ANKRD13A	ENSG00000076513	1659.26	-0.56041	0.00016236
386	FANCC	ENSG00000158169	142.096	-0.637247	0.000162595
387	SGO1	ENSG00000129810	21.2339	-1.57827	0.000165555
388	CDH3	ENSG00000062038	26.8542	-1.60904	0.000167128
389	ITPRIP	ENSG00000148841	419.936	-0.530385	0.000170624
390	DCAF13	ENSG00000164934	459.669	-0.597967	0.000173392
391	WDR4	ENSG00000160193	152.199	-0.782928	0.000174747
392	POLE	ENSG00000177084	480.632	-1.08751	0.00018193
393	LIPG	ENSG00000101670	56.2664	-1.40929	0.000189048
394	GRK6	ENSG00000198055	312.075	-0.880299	0.000195808
395	CCT8	ENSG00000156261	1753.81	-0.566628	0.000197986
396	PSPH	ENSG00000146733	135.285	-0.574775	0.000198214
397	TYRO3	ENSG00000092445	433.232	-0.493691	0.000200496
398	AK4	ENSG00000162433	157.393	-1.00244	0.000204574
399	TUBB2A	ENSG00000137267	2238.36	-0.636565	0.00020617
400	PANK4	ENSG00000157881	241.503	-0.41961	0.00020665
401	HSPD1	ENSG00000144381	2107.05	-0.606663	0.000209279
402	POLD1	ENSG00000062822	214.924	-0.897051	0.000220786
403	RCC1	ENSG00000180198	395.932	-0.494809	0.000237653
404	COL13A1	ENSG00000197467	453.214	-0.639894	0.000244146
405	TTC27	ENSG00000018699	286.752	-0.503819	0.000244287
406	MARCHF3	ENSG00000173926	34.836	-1.10503	0.000251416
407	ARG2	ENSG00000081181	21.809	-1.47471	0.000252322
408	MTHFD2	ENSG00000065911	463.416	-0.981461	0.000253879
409	CDK1	ENSG00000170312	187.035	-1.12149	0.000253879
410	SDHA	ENSG00000073578	1148.09	-0.392621	0.000255146
411	NUSAP1	ENSG00000137804	239.487	-1.20147	0.000258805
412	CENPW	ENSG00000203760	70.7408	-1.07788	0.000258805
413	PDPN	ENSG00000162493	230.798	-0.633756	0.000266395
414	FARSB	ENSG00000116120	918.639	-0.675536	0.000266889
415	PCNA	ENSG00000132646	864.752	-0.713686	0.000268088
416	POLA2	ENSG00000014138	424.747	-0.865117	0.000272798
417	MICALL1	ENSG00000100139	1019.76	-0.74076	0.000273384
418	RFC2	ENSG00000049541	194.292	-0.896109	0.000277261
419	HAUS8	ENSG00000131351	64.1036	-1.23216	0.00029188
420	HMGB1P6	ENSG00000259781	154.691	-0.778107	0.000308841
421	RTL3	ENSG00000179300	19.5977	-1.5655	0.000317846
422	HSP90AB1	ENSG00000096384	9908.41	-0.437604	0.000319249
423	TCP1	ENSG00000120438	1385.15	-0.540916	0.000319249
424	RAB32	ENSG00000118508	805.211	-0.718131	0.0003202
425	BRCA1	ENSG00000012048	146.684	-0.906532	0.000343674
426	PPP5C	ENSG00000011485	818.931	-0.467906	0.000344601
427	TOMM40	ENSG00000130204	703.383	-0.848364	0.00035046
428	RECQL4	ENSG00000160957	283.056	-1.36833	0.000354204
429	SFN	ENSG00000175793	26.5178	-3.15018	0.000354204
430	SRSF7	ENSG00000115875	883.266	-0.557576	0.000365826
431	MGLL	ENSG00000074416	5883.29	-0.44814	0.000369608
432	TTC4	ENSG00000243725	361.448	-0.459505	0.000371221
433	ADAM12	ENSG00000148848	53.8638	-1.24528	0.000376341
434	TBX15	ENSG00000092607	121.522	-0.879969	0.000399037
435	IWS1	ENSG00000163166	414.857	-0.591536	0.000402549
436	RFC3	ENSG00000133119	78.7737	-0.919104	0.000412274
437	EBNA1BP2	ENSG00000117395	826.766	-0.747253	0.000413364
438	VASP	ENSG00000125753	1632.73	-0.598508	0.000417928
439	HMGN2	ENSG00000198830	2535.14	-0.609872	0.000421316
440	ORC6	ENSG00000091651	92.4304	-0.885271	0.000428768
441	GDI2	ENSG00000057608	2709.62	-0.401306	0.000470584
442	NCAPD3	ENSG00000151503	354.191	-0.613431	0.000481809
443	TRAIP	ENSG00000183763	66.6826	-1.26885	0.00049087
444	―	ENSG00000269954	57.0318	-2.29531	0.00050971
445	GADD45B	ENSG00000099860	368.869	-0.719635	0.000516814
446	CDT1	ENSG00000167513	185.839	-1.25155	0.000527968
447	TNFAIP8L3	ENSG00000183578	7.46163	-2.35777	0.000533896
448	EXOSC8	ENSG00000120699	240.36	-0.580608	0.00055306
449	H2AZ1	ENSG00000164032	2625.79	-0.718362	0.000555278
450	ZMYND19	ENSG00000165724	265.791	-0.895199	0.00056224
451	CSTF2	ENSG00000101811	130.751	-0.562393	0.000564827
452	NEK2	ENSG00000117650	44.338	-1.15537	0.000587842
453	NOLC1	ENSG00000166197	627.95	-0.698024	0.000594137
454	STIP1	ENSG00000168439	1702.23	-0.683429	0.000619677
455	NCAPH2	ENSG00000025770	648.042	-1.14455	0.000629875
456	SCARB1	ENSG00000073060	420.241	-0.672061	0.000629875
457	TMSB15A	ENSG00000158164	11.3466	-1.73913	0.000635518
458	VRK1	ENSG00000100749	100.68	-0.774314	0.00064085
459	LYPD6	ENSG00000187123	106.792	-0.972357	0.000647639
460	POLQ	ENSG00000051341	47.0505	-1.2122	0.000647804
461	FAM20C	ENSG00000177706	1401.53	-1.15823	0.000651179
462	SUV39H1	ENSG00000101945	174.983	-1.07219	0.000657964
463	NUP35	ENSG00000163002	71.4119	-0.916433	0.000657964
464	PA2G4	ENSG00000170515	1763.9	-0.587313	0.000663524
465	PDCL3	ENSG00000115539	200.54	-0.687025	0.000664957
466	GALNT6	ENSG00000139629	455.471	-1.15631	0.00069775
467	STMN3	ENSG00000197457	410.398	-0.570587	0.000699908
468	LIG1	ENSG00000105486	412.144	-0.651105	0.00071495
469	UBE2S	ENSG00000108106	1050.06	-1.4556	0.00071883
470	PTGIS	ENSG00000124212	27.198	-1.81624	0.00071883
471	TMPO-AS1	ENSG00000257167	31.4009	-1.03071	0.00071883
472	TEAD4	ENSG00000197905	175.554	-0.914968	0.000722206
473	NES	ENSG00000132688	8192.33	-1.04518	0.000730583
474	SLC7A4	ENSG00000099960	26.3553	-1.09972	0.000754884
475	SLC29A1	ENSG00000112759	281.93	-0.587132	0.000754884
476	AVEN	ENSG00000169857	299.089	-0.559826	0.000763013
477	TTLL4	ENSG00000135912	282.658	-0.4923	0.00076691
478	MRTO4	ENSG00000053372	386.689	-0.87884	0.000780288
479	IL13RA2	ENSG00000123496	275.818	-1.11201	0.000785371
480	EPB41L3	ENSG00000082397	5.05824	-6.57166	0.0007871
481	C12orf75	ENSG00000235162	3240.57	-0.647476	0.000796603
482	IMPA2	ENSG00000141401	434.632	-0.573525	0.000811484
483	PBDC1	ENSG00000102390	277.124	-0.992351	0.00081217
484	NAV1	ENSG00000134369	1511.91	-0.790561	0.000849497
485	PHGDH	ENSG00000092621	894.399	-1.12934	0.000854879
486	AACS	ENSG00000081760	934.273	-0.498095	0.000906717
487	CPXM2	ENSG00000121898	3.08722	-4.66253	0.000912524
488	BCAR3	ENSG00000137936	346.11	-0.792556	0.000923739
489	KARS1	ENSG00000065427	1593.26	-0.538121	0.000930217
490	VDAC2	ENSG00000165637	1657.37	-0.436431	0.000938229
491	TARS1	ENSG00000113407	1051.07	-0.585997	0.000943917
492	GLI1	ENSG00000111087	48.4684	-1.12986	0.00094645
493	IGSF23	ENSG00000216588	5.70453	-3.15499	0.000946761
494	AFG3L2	ENSG00000141385	578.068	-0.41986	0.000975699
495	KIF24	ENSG00000186638	49.8845	-0.974194	0.0009969
496	DDX27	ENSG00000124228	527.963	-0.497305	0.000998757
497	RTCB	ENSG00000100220	932.964	-0.491549	0.00101114
498	TRHDE-AS1	ENSG00000236333	29.8319	-0.983011	0.00104545
499	TRABD2A	ENSG00000186854	15.9855	-1.41646	0.00104707
500	SDR42E1	ENSG00000184860	34.5551	-1.07487	0.00110411
501	NRDC	ENSG00000078618	2227.26	-0.254725	0.00114762
502	FAM83H	ENSG00000180921	140.9	-0.598968	0.00114898
503	BOP1	ENSG00000261236	904.695	-1.4175	0.00116466
504	―	ENSG00000287516	27.1604	-1.1993	0.00116529
505	AFAP1L2	ENSG00000169129	53.0264	-1.17019	0.00116981
506	JMJD6	ENSG00000070495	343.229	-0.935645	0.00117193
507	ACTG1	ENSG00000184009	41217.3	-0.423276	0.00118103
508	PSRC1	ENSG00000134222	220.36	-0.970035	0.00118584
509	TACC2	ENSG00000138162	240.45	-0.657902	0.00119947
510	RANBP1	ENSG00000099901	888.88	-0.870069	0.00122488
511	S100A3	ENSG00000188015	47.7642	-1.3729	0.00122508
512	GDA	ENSG00000119125	46.2366	-1.07026	0.00125051
513	RTL10	ENSG00000215012	1012.82	-0.512763	0.00130076
514	SEMA3F	ENSG00000001617	13.5944	-1.8941	0.0013169
515	RRS1	ENSG00000179041	237.852	-0.601831	0.00132997
516	ITPRIPL1	ENSG00000198885	26.3442	-1.1003	0.00135124
517	POC1A	ENSG00000164087	205.72	-1.21023	0.00136304
518	CARD9	ENSG00000187796	249.395	-0.839725	0.00136304
519	MTHFD1	ENSG00000100714	936.583	-0.407202	0.00139549
520	FAM107B	ENSG00000065809	247.228	-1.09162	0.00139578
521	SLC1A4	ENSG00000115902	629.669	-0.352601	0.0014114
522	THBD	ENSG00000178726	60.0087	-3.56282	0.00142318
523	PLK4	ENSG00000142731	69.1185	-1.11623	0.0014318
524	SRR	ENSG00000167720	167.816	-0.558152	0.00145937
525	UMPS	ENSG00000114491	265.153	-0.567385	0.00147795
526	IL4R	ENSG00000077238	635.913	-0.535944	0.00151848
527	SNHG15	ENSG00000232956	258.811	-0.92412	0.0015467
528	NOL7	ENSG00000225921	333.478	-0.663729	0.00163315
529	MCM6	ENSG00000076003	489.688	-0.566388	0.00164175
530	CENPV	ENSG00000166582	69.3644	-0.901933	0.00164732
531	ARSI	ENSG00000183876	26.297	-1.14631	0.00166447
532	HMMR	ENSG00000072571	81.7564	-1.18395	0.00172713
533	―	ENSG00000271897	5.3313	-3.01397	0.00172713
534	COL11A1	ENSG00000060718	771.973	-1.01734	0.00172719
535	CENPE	ENSG00000138778	134.459	-1.0534	0.00173154
536	ITGB1BP1	ENSG00000119185	996.846	-0.426735	0.0017344
537	UCN2	ENSG00000145040	164.709	-1.05346	0.0017344
538	CSPG4	ENSG00000173546	3930.22	-0.880116	0.00175698
539	NPW	ENSG00000183971	51.4898	-1.75266	0.00177438
540	ATP1B1	ENSG00000143153	57.567	-1.21393	0.00178913
541	POU2F2	ENSG00000028277	2074.35	-0.7886	0.00183174
542	PSD4	ENSG00000125637	79.8308	-0.68639	0.00183355
543	SLC35E4	ENSG00000100036	155.97	-0.556704	0.00183986
544	DOCK2	ENSG00000134516	96.4396	-0.716819	0.00185953
545	C3orf52	ENSG00000114529	32.3107	-0.886354	0.0018958
546	SMAGP	ENSG00000170545	668.909	-0.607336	0.00190713
547	MRPS9	ENSG00000135972	189.963	-0.66004	0.00193029
548	RARS1	ENSG00000113643	1305.06	-0.456433	0.00193511
549	SMTN	ENSG00000183963	3696.58	-0.780829	0.00193511
550	FDFT1	ENSG00000079459	4228.45	-0.420248	0.00194998
551	CCT3	ENSG00000163468	2756.56	-0.492489	0.00195427
552	SPC24	ENSG00000161888	113.655	-1.47154	0.00196562
553	HNRNPD	ENSG00000138668	1307.95	-0.530327	0.00198129
554	C10orf55	ENSG00000222047	27.585	-1.08346	0.00201938
555	PFAS	ENSG00000178921	266.271	-0.696129	0.00202989
556	PTGER1	ENSG00000160951	156.84	-1.17535	0.00204734
557	NRXN2	ENSG00000110076	6.85044	-2.67423	0.00206621
558	CTNNAL1	ENSG00000119326	849.282	-0.725777	0.00206973
559	EPGN	ENSG00000182585	3.17727	-4.72984	0.00207224
560	WSCD1	ENSG00000179314	9.58726	-1.69956	0.00207739
561	WIF1	ENSG00000156076	7.66708	-4.72854	0.00208841
562	ERCC6L	ENSG00000186871	37.7311	-1.04967	0.00208841
563	DDX39A	ENSG00000123136	746.022	-0.963302	0.00211898
564	MUS81	ENSG00000172732	430.476	-0.574714	0.00212178
565	ADORA2B	ENSG00000170425	93.6411	-0.900095	0.00213361
566	IRX3	ENSG00000177508	41.7446	-0.908294	0.00214986
567	IRX2	ENSG00000170561	33.6304	-1.11758	0.00220645
568	DCUN1D5	ENSG00000137692	409.154	-0.616616	0.00223624
569	REPS1	ENSG00000135597	294.051	-0.474529	0.00231912
570	CUL1	ENSG00000055130	742.287	-0.358018	0.00234103
571	HES2	ENSG00000069812	4.64155	-3.10435	0.00234592
572	STMN1	ENSG00000117632	2082.67	-0.627116	0.0023603
573	EVA1A	ENSG00000115363	154.778	-0.634235	0.00244019
574	PITPNC1	ENSG00000154217	120.112	-0.681046	0.00244851
575	MARCHF4	ENSG00000144583	1071.45	-0.479992	0.00246383
576	KIF20B	ENSG00000138182	87.313	-0.956237	0.00251621
577	KIF15	ENSG00000163808	37.3686	-1.12994	0.00253227
578	MRPS7	ENSG00000125445	594.463	-0.682578	0.00257524
579	DEPDC1	ENSG00000024526	89.0132	-1.3363	0.00259811
580	NOP14	ENSG00000087269	444.545	-0.311039	0.00262083
581	SFXN2	ENSG00000156398	30.3146	-0.966207	0.00262083
582	CMC2	ENSG00000103121	310.876	-0.67036	0.00264814
583	RAI2	ENSG00000131831	5.22854	-2.79558	0.00265358
584	IFRD2	ENSG00000214706	528.086	-0.748851	0.00267378
585	XRCC6	ENSG00000196419	3750.04	-0.568607	0.00271525
586	PGAM1	ENSG00000171314	5199.98	-0.433541	0.00282096
587	XRCC3	ENSG00000126215	207.259	-0.553238	0.00284299
588	PSCA	ENSG00000167653	48.2412	-1.23486	0.00284312
589	EEF1A2	ENSG00000101210	18.4313	-1.52579	0.00291293
590	GALNT14	ENSG00000158089	90.5187	-0.688245	0.00291928
591	―	ENSG00000176349	115.641	-1.14186	0.00299021
592	C2CD2	ENSG00000157617	667.928	-0.49295	0.00300366
593	DCTPP1	ENSG00000179958	365.576	-0.701229	0.00302604
594	ADSL	ENSG00000239900	764.997	-0.44707	0.00308188
595	LINC00973	ENSG00000240476	31.7284	-1.07951	0.00314707
596	ALYREF	ENSG00000183684	529.958	-0.766099	0.00324127
597	DDX19B	ENSG00000157349	287.98	-0.447785	0.00324481
598	DPH2	ENSG00000132768	273.782	-0.528195	0.00325382
599	DHX37	ENSG00000150990	399.738	-0.542361	0.00326733
600	GPN1	ENSG00000198522	419.963	-0.413782	0.00326733
601	EOLA2	ENSG00000197021	285.182	-0.510225	0.0032978
602	SLC7A1	ENSG00000139514	923.199	-0.87195	0.00340152
603	ARHGEF2	ENSG00000116584	1161.35	-0.421182	0.00342101
604	MAPK13	ENSG00000156711	223.715	-0.437658	0.00344816
605	ERVK3-1	ENSG00000142396	306.858	-0.478268	0.00354071
606	GMFG	ENSG00000130755	6.33012	-2.01066	0.00357254
607	SDHB	ENSG00000117118	502.128	-0.589409	0.00363712
608	SEC14L2	ENSG00000100003	289.838	-0.394777	0.00366969
609	PGK1	ENSG00000102144	3248.86	-0.465836	0.00371945
610	FAXC	ENSG00000146267	29.5943	-1.06481	0.00371945
611	SLC35F2	ENSG00000110660	52.7986	-0.865353	0.00372081
612	NUP93	ENSG00000102900	523.397	-0.407294	0.00373994
613	TCOF1	ENSG00000070814	620.548	-1.12407	0.00374372
614	CACYBP	ENSG00000116161	448.707	-0.599386	0.00374372
615	HAUS1	ENSG00000152240	174.353	-0.596371	0.00374372
616	SIPA1	ENSG00000213445	687.694	-0.828985	0.00376762
617	CSRNP1	ENSG00000144655	365.448	-0.48223	0.00377809
618	E2F2	ENSG00000007968	40.277	-1.134	0.00378272
619	TYW3	ENSG00000162623	188.338	-0.578312	0.00379195
620	GAL	ENSG00000069482	83.0456	-1.07746	0.00381025
621	PRXL2A	ENSG00000122378	283.024	-0.46203	0.00386415
622	CSRP1	ENSG00000159176	8769.3	-0.638256	0.00386934
623	PLAC9	ENSG00000189129	346.979	-1.7814	0.00391724
624	SSBP1	ENSG00000106028	654.888	-0.641642	0.0039272
625	KPNB1	ENSG00000108424	3108.41	-0.520677	0.0039272
626	EIF2S2	ENSG00000125977	1369.15	-0.585902	0.0039272
627	VGF	ENSG00000128564	13.7534	-1.78393	0.00409556
628	WDR76	ENSG00000092470	118.179	-0.887942	0.00409769
629	HROB	ENSG00000125319	110.267	-0.95408	0.00414126
630	PALD1	ENSG00000107719	22.6323	-1.08031	0.00414489
631	FOXC2	ENSG00000176692	16.6001	-1.42533	0.00414489
632	RTTN	ENSG00000176225	104.421	-0.594772	0.00425629
633	CCDC86	ENSG00000110104	457.761	-0.634625	0.00427158
634	AJAP1	ENSG00000196581	27.1496	-1.1861	0.00428336
635	KIF23	ENSG00000137807	260.157	-1.09103	0.0042884
636	MIOS	ENSG00000164654	185.971	-0.645195	0.00430062
637	SCFD2	ENSG00000184178	418.126	-0.338786	0.00430946
638	ETV4	ENSG00000175832	515.334	-0.982319	0.00432953
639	CHCHD3	ENSG00000106554	506.425	-0.347319	0.0044208
640	PRSS3	ENSG00000010438	31.609	-1.2088	0.00443546
641	RFX8	ENSG00000196460	98.113	-0.745223	0.00461411
642	NOB1	ENSG00000141101	560.686	-0.411556	0.00464126
643	ACAT1	ENSG00000075239	612.045	-0.458434	0.00473471
644	CYP27B1	ENSG00000111012	25.5613	-1.04341	0.00475951
645	KCNJ15	ENSG00000157551	36.2421	-1.04673	0.00482596
646	RNASEH2A	ENSG00000104889	372.681	-1.02432	0.00486557
647	PID1	ENSG00000153823	979.102	-0.397164	0.00489275
648	MAPRE1	ENSG00000101367	1110.98	-0.433478	0.00489445
649	CORO1A	ENSG00000102879	27.1404	-1.12834	0.00497006
650	SGPP2	ENSG00000163082	23.3471	-1.01985	0.00497251
651	CKAP2L	ENSG00000169607	79.8483	-1.2005	0.00502406
652	YBX3	ENSG00000060138	1689.69	-0.537297	0.00516109
653	―	ENSG00000272121	3.10569	-3.2317	0.00517652
654	LRRC8E	ENSG00000171017	119.381	-0.504912	0.00519595
655	HIRIP3	ENSG00000149929	120.745	-0.801901	0.00532924
656	IL17RE	ENSG00000163701	94.1738	-0.905464	0.00542198
657	DHX38	ENSG00000140829	713.695	-0.349899	0.00547723
658	EIF3H	ENSG00000147677	1752.34	-0.402989	0.00550005
659	DONSON	ENSG00000159147	215.062	-0.669512	0.00550059
660	NETO2	ENSG00000171208	100.902	-0.991834	0.00550059
661	PDCD5	ENSG00000105185	620.588	-0.570596	0.0056201
662	ANKLE2	ENSG00000176915	1307.13	-0.407287	0.00562508
663	HARS1	ENSG00000170445	1495.81	-0.503151	0.00570436
664	ADPRHL1	ENSG00000153531	44.7375	-0.716119	0.00574189
665	SLC5A6	ENSG00000138074	486.973	-0.471977	0.00574906
666	POLE2	ENSG00000100479	42.6473	-1.06402	0.00581662
667	CRIP2	ENSG00000182809	332.811	-1.11865	0.00582994
668	KLF2	ENSG00000127528	470.941	-0.536331	0.00588284
669	MTFR2	ENSG00000146410	24.287	-1.11788	0.00603039
670	NOPCHAP1	ENSG00000151131	134.72	-0.511633	0.00603039
671	SLCO4A1	ENSG00000101187	48.5549	-0.94594	0.00604906
672	UBE2V1	ENSG00000244687	1331.76	-0.393102	0.00613201
673	―	ENSG00000295911	49.5207	-1.18671	0.00624787
674	IDH3A	ENSG00000166411	394.147	-0.408232	0.00628939
675	SLC25A10	ENSG00000183048	102.001	-1.21428	0.00635499
676	MT2A	ENSG00000125148	3576.44	-0.985084	0.00638955
677	SLC2A6	ENSG00000160326	720.126	-0.662606	0.00638955
678	CARD10	ENSG00000100065	456.437	-0.617567	0.00641988
679	CAP1	ENSG00000131236	5108.66	-0.457429	0.00643372
680	EMP2	ENSG00000213853	460.349	-0.505108	0.00653262
681	TOP2A	ENSG00000131747	582.949	-1.03944	0.00659407
682	SLC7A6OS	ENSG00000103061	257.013	-0.544473	0.00659933
683	RUVBL2	ENSG00000183207	1210.21	-1.00777	0.00665621
684	―	ENSG00000289423	3.97236	-3.21194	0.00665621
685	GTF3C6	ENSG00000155115	488.837	-0.6533	0.00673259
686	UQCRFS1P1	ENSG00000226085	98.7894	-0.635959	0.00673259
687	CCBE1	ENSG00000183287	444.694	-0.399951	0.00673443
688	CHTF18	ENSG00000127586	250.471	-1.00363	0.00677424
689	TRMU	ENSG00000100416	473.489	-0.788184	0.00684738
690	YDJC	ENSG00000161179	232.643	-0.711399	0.00684738
691	DDX47	ENSG00000213782	750.986	-0.572247	0.0068655
692	CHAC2	ENSG00000143942	10.8255	-1.44506	0.00689769
693	PDLIM1	ENSG00000107438	1400.11	-0.717694	0.00691817
694	TDP1	ENSG00000042088	167.174	-0.463028	0.00695094
695	PWP1	ENSG00000136045	758.546	-0.381156	0.00695094
696	DLX2	ENSG00000115844	9.82231	-1.77076	0.00707197
697	MTFP1	ENSG00000242114	120.558	-1.11896	0.00709492
698	SF3A3	ENSG00000183431	1034.07	-0.346209	0.00712201
699	DEPDC1B	ENSG00000035499	18.4016	-1.48217	0.00719247
700	TRIM55	ENSG00000147573	36.556	-0.89572	0.00719247
701	CLIC1	ENSG00000213719	6653	-0.548337	0.00723101
702	GLIPR1	ENSG00000139278	500.415	-0.695282	0.00727559
703	SNRPD1	ENSG00000167088	522.793	-0.777147	0.00728243
704	RPSAP52	ENSG00000293176	58.9685	-0.89299	0.00728687
705	MRPL3	ENSG00000114686	426.882	-0.551848	0.00736123
706	NSD2	ENSG00000109685	916.713	-0.558748	0.00738712
707	LIPE	ENSG00000079435	47.3973	-0.892564	0.00741034
708	KIRREL3	ENSG00000149571	186.659	-0.704624	0.00745732
709	SLBP	ENSG00000163950	485.591	-0.568638	0.00745732
710	ACP3	ENSG00000014257	457.023	-0.80611	0.0074952
711	RPUSD4	ENSG00000165526	259.047	-0.679933	0.0074952
712	IGF2BP2	ENSG00000073792	962.896	-0.469077	0.00753626
713	NRIP3	ENSG00000175352	136.561	-0.637708	0.00771721
714	―	ENSG00000264577	40.581	-0.900071	0.00783404
715	SHMT2	ENSG00000182199	1576.34	-0.609122	0.00785276
716	BTG3	ENSG00000154640	396.585	-0.432	0.0079552
717	S100A10	ENSG00000197747	4899.79	-0.620267	0.00797723
718	ILK	ENSG00000166333	4040.83	-0.587058	0.00798598
719	NUAK2	ENSG00000163545	116.572	-0.712124	0.00798669
720	MPP3	ENSG00000161647	106.152	-0.496513	0.0080177
721	MCM4	ENSG00000104738	574.333	-0.615928	0.00803712
722	ACOT7	ENSG00000097021	1014.81	-0.663046	0.0080471
723	RNF34	ENSG00000170633	421.215	-0.366545	0.0080471
724	PYCR1	ENSG00000183010	1146.19	-0.579399	0.0080471
725	ZNF598	ENSG00000167962	559.188	-0.580835	0.00815018
726	MAPKAPK5	ENSG00000089022	268.433	-0.480949	0.00819218
727	JPT1	ENSG00000189159	1634.79	-0.889119	0.00822354
728	EIF4A1	ENSG00000161960	9389.13	-0.571377	0.00825427
729	IER5	ENSG00000162783	843.073	-0.405579	0.00825983
730	EGFLAM	ENSG00000164318	10.3021	-4.18152	0.00826905
731	RAD18	ENSG00000070950	180.355	-0.493803	0.00832631
732	TUFT1	ENSG00000143367	225.43	-0.385042	0.00835185
733	SEC13	ENSG00000157020	1603.38	-0.498337	0.00835185
734	CSF2	ENSG00000164400	19.9112	-1.05579	0.00835185
735	SLC24A3	ENSG00000185052	18.5487	-1.84194	0.00838415
736	FAF1	ENSG00000185104	516.036	-0.293932	0.00846198
737	CENPJ	ENSG00000151849	102.092	-0.708139	0.00848214
738	CHTOP	ENSG00000160679	677.919	-0.465686	0.00849347
739	EIF2S1	ENSG00000134001	824.314	-0.52773	0.00865604
740	CRACR2A	ENSG00000130038	34.6553	-0.895267	0.00866083
741	RPL4	ENSG00000174444	18547.4	-0.467611	0.00876777
742	DTYMK	ENSG00000168393	518.079	-0.935452	0.00879984
743	ISM1	ENSG00000101230	92.8763	-1.45549	0.00893187
744	FDPS	ENSG00000160752	5756.81	-0.504409	0.00893247
745	DOT1L	ENSG00000104885	319.43	-0.665206	0.00893799
746	UTP11	ENSG00000183520	243.825	-0.550743	0.00913114
747	RRP7A	ENSG00000189306	692.691	-1.06415	0.00924892
748	NOL10	ENSG00000115761	377.175	-0.413951	0.00947057
749	CORO2B	ENSG00000103647	578.641	-0.732014	0.00957337
750	CDCA7	ENSG00000144354	42.1483	-1.29185	0.00963338
751	INPP5J	ENSG00000185133	8.68807	-2.54048	0.00977184
752	―	ENSG00000306644	9.6498	-2.25466	0.00977184
753	HMGB3	ENSG00000029993	314.139	-0.484118	0.00978294
754	PPIL1	ENSG00000137168	324.307	-0.526442	0.00979316
755	TOMM34	ENSG00000025772	773.338	-0.594692	0.00983049
756	ENO1	ENSG00000074800	15001.5	-0.505544	0.00992254
757	BDH1	ENSG00000161267	61.5516	-0.71329	0.00995597
758	DNAJA3	ENSG00000103423	555.32	-0.285069	0.00999502
759	BCCIP	ENSG00000107949	349.597	-0.546754	0.010102
760	FAM162B	ENSG00000183807	6.16238	-1.80138	0.010102
761	TEDC1	ENSG00000185347	130.388	-1.36978	0.010102
762	ZNF544	ENSG00000198131	233.536	-0.392677	0.010102
763	NME1	ENSG00000239672	2155.41	-0.968493	0.010102
764	SPTLC2	ENSG00000100596	646.025	-0.341726	0.0101238
765	EIF3I	ENSG00000084623	1937.25	-0.432418	0.0101294
766	JPH2	ENSG00000149596	221.712	-0.553446	0.0101493
767	PAK1	ENSG00000149269	905.236	-0.299838	0.0101637
768	ANXA5	ENSG00000164111	10960.5	-0.409399	0.0102089
769	EPS8L1	ENSG00000131037	50.1716	-1.09724	0.0103769
770	RPS6KA1	ENSG00000117676	17.134	-1.40115	0.0103796
771	JADE1	ENSG00000077684	270.136	-0.514784	0.0104309
772	GSPT1	ENSG00000103342	2092.09	-0.452009	0.0105047
773	STOML2	ENSG00000165283	1008.41	-0.458263	0.0107457
774	IRX1	ENSG00000170549	4.7073	-2.38576	0.0107562
775	PYGB	ENSG00000100994	5121.38	-0.693664	0.0107966
776	PLCXD1	ENSG00000182378	99.7156	-0.597399	0.0107966
777	PLCXD1	ENSG00000292344	99.7156	-0.597399	0.0107966
778	TEX10	ENSG00000136891	367.564	-0.496155	0.0108553
779	PDF	ENSG00000258429	61.6618	-0.83152	0.0108553
780	ZYG11A	ENSG00000203995	5.08165	-2.36584	0.0109083
781	TIPIN	ENSG00000075131	55.1982	-0.916736	0.0109924
782	EPHA2	ENSG00000142627	945.873	-0.351748	0.0109924
783	ULBP1	ENSG00000111981	11.895	-1.57372	0.0110002
784	MEI1	ENSG00000167077	17.4641	-1.0934	0.0110744
785	LTV1	ENSG00000135521	228.03	-0.582741	0.0110954
786	FHL2	ENSG00000115641	985.914	-0.547363	0.0110955
787	GPSM3	ENSG00000213654	147.741	-0.774799	0.0112955
788	UPF3A	ENSG00000169062	426.513	-0.420336	0.0113367
789	SRP68	ENSG00000167881	1126.34	-0.356658	0.0114193
790	ACTN4	ENSG00000130402	7406.53	-0.350522	0.0115036
791	MIR3648-2	ENSG00000264462	32.3066	-3.25146	0.0115036
792	MIR3648-1	ENSG00000275708	32.3066	-3.25146	0.0115036
793	HNRNPH3	ENSG00000096746	1046.08	-0.379012	0.011513
794	EIF2B3	ENSG00000070785	405.452	-0.762329	0.0115577
795	E2F1	ENSG00000101412	266.311	-1.02545	0.011608
796	TNS1	ENSG00000079308	747.831	-0.537825	0.0116391
797	CHCHD2	ENSG00000106153	1035.17	-0.553774	0.0117151
798	TCEAL4	ENSG00000133142	1436.39	-0.495015	0.0118285
799	ATAD3A	ENSG00000197785	878.376	-1.31031	0.0118285
800	STEAP1	ENSG00000164647	61.6443	-0.935047	0.0118662
801	PCMT1	ENSG00000120265	587.91	-0.547017	0.0118718
802	CNIH3-AS2	ENSG00000233384	3.93677	-2.83817	0.0121154
803	CCDC137	ENSG00000185298	369.797	-0.863666	0.0121842
804	INPP1	ENSG00000151689	287.004	-0.443127	0.0121905
805	PTGIR	ENSG00000160013	420.135	-0.984637	0.012194
806	CPNE2	ENSG00000140848	352.69	-0.550848	0.012238
807	H1-5	ENSG00000184357	3.41677	-4.35416	0.0124541
808	THOP1	ENSG00000172009	621.473	-0.902577	0.0124658
809	PCLAF	ENSG00000166803	96.6764	-0.830642	0.0125389
810	TUBB2B	ENSG00000137285	37.9011	-1.12095	0.0125704
811	IL12A	ENSG00000168811	26.3696	-1.17032	0.0125905
812	AKIP1	ENSG00000166452	339.086	-0.453846	0.0127897
813	SHB	ENSG00000107338	551.478	-0.548729	0.0128478
814	C19orf48P	ENSG00000293495	624.891	-1.0254	0.012941
815	NCAPG2	ENSG00000146918	227.837	-0.909445	0.0129778
816	UAP1	ENSG00000117143	1374.24	-0.703552	0.0129928
817	SPHK1	ENSG00000176170	1140.78	-1.27043	0.01302
818	ARPC1A	ENSG00000241685	1460.25	-0.364432	0.0130933
819	RGS10	ENSG00000148908	423.6	-0.64487	0.0131221
820	AXL	ENSG00000167601	3561.39	-0.599195	0.0131519
821	BLMH	ENSG00000108578	401.436	-0.466484	0.0136229
822	FBXL16	ENSG00000127585	14.0164	-1.42317	0.0136229
823	RUVBL1	ENSG00000175792	610.389	-0.523702	0.0136229
824	LINP1	ENSG00000223784	19.3652	-1.28495	0.0136229
825	AHCY	ENSG00000101444	1861.06	-0.417417	0.0138309
826	MAFF	ENSG00000185022	675.489	-0.47521	0.0138769
827	―	ENSG00000304743	4.76955	-2.9596	0.0138874
828	BCS1L	ENSG00000074582	295.417	-0.472271	0.0139794
829	MAGOHB	ENSG00000111196	123.797	-0.603206	0.0139828
830	ANP32B	ENSG00000136938	1311.2	-0.641468	0.0140494
831	SEMA4D	ENSG00000187764	21.2746	-1.23374	0.0140729
832	―	ENSG00000253722	5.5945	-2.7605	0.0141855
833	EMILIN2	ENSG00000132205	1638.33	-0.400602	0.0142881
834	INCENP	ENSG00000149503	204.306	-0.631238	0.0142881
835	CASP3	ENSG00000164305	383.437	-0.949729	0.0142881
836	PDHA1	ENSG00000131828	730.409	-0.418878	0.0143651
837	SPRYD7	ENSG00000123178	206.48	-0.486035	0.0143811
838	FKBP3	ENSG00000100442	553.426	-0.627201	0.0143957
839	―	ENSG00000280241	7.86964	-1.8877	0.0145281
840	PRMT5	ENSG00000100462	1039.75	-0.346697	0.0146328
841	PLGRKT	ENSG00000107020	177.623	-0.574304	0.0146328
842	AATF	ENSG00000275700	696.932	-0.575747	0.0146859
843	KRT17	ENSG00000128422	866.174	-1.01354	0.0147318
844	DCLK2	ENSG00000170390	334.468	-0.428173	0.0148217
845	SERPINB2	ENSG00000197632	375.91	-1.22173	0.014886
846	PDCD11	ENSG00000148843	941.475	-0.57193	0.0149259
847	BMPER	ENSG00000164619	113.425	-1.18104	0.0149754
848	GJC1	ENSG00000182963	281.851	-0.69702	0.0150106
849	CYP2S1	ENSG00000167600	8.04245	-1.98847	0.0150874
850	ARL3	ENSG00000138175	279.163	-0.524136	0.0152097
851	―	ENSG00000308602	9.57313	-1.70402	0.0153619
852	―	ENSG00000259001	15.6126	-3.93325	0.0154671
853	XBP1	ENSG00000100219	1504.91	-0.460455	0.0155594
854	―	ENSG00000261505	24.6616	-2.15878	0.0155781
855	NOC2L	ENSG00000188976	1366.72	-0.830353	0.0156293
856	BMS1	ENSG00000165733	580.687	-0.401169	0.0156747
857	PPAN	ENSG00000130810	433.537	-1.18706	0.0157494
858	DNER	ENSG00000187957	18.1239	-1.13378	0.0157494
859	GPSM2	ENSG00000121957	261.896	-0.785264	0.0158258
860	ENPP1	ENSG00000197594	185.284	-0.653552	0.0158258
861	LPCAT1	ENSG00000153395	824.491	-0.597023	0.0158697
862	STAMBPL1	ENSG00000138134	340.724	-0.439821	0.0158795
863	IMP4	ENSG00000136718	606.535	-0.55413	0.0158949
864	H2AX	ENSG00000188486	1020.05	-0.784081	0.0159384
865	CGREF1	ENSG00000138028	39.8721	-0.98048	0.0160035
866	DHX16	ENSG00000204560	433.882	-0.305723	0.0161651
867	SOX11	ENSG00000176887	5.52694	-1.7396	0.0162413
868	SRXN1	ENSG00000271303	1401.24	-0.382108	0.0164146
869	H1-0	ENSG00000189060	1732.48	-0.446665	0.0164327
870	SMPD4	ENSG00000136699	1146.61	-0.374339	0.0164488
871	PSME4	ENSG00000068878	802.004	-0.420977	0.0167073
872	NAA20	ENSG00000173418	648.963	-0.479627	0.0167135
873	AEN	ENSG00000181026	905.66	-0.357455	0.0168504
874	DHFR	ENSG00000228716	306.454	-0.635147	0.0169001
875	INO80C	ENSG00000153391	127.605	-0.691639	0.0170018
876	DPF3	ENSG00000205683	281.289	-0.397212	0.0170322
877	DDX54	ENSG00000123064	987.469	-0.687611	0.0170603
878	VOPP1	ENSG00000154978	1930.73	-0.345118	0.0171444
879	GCAT	ENSG00000100116	317.767	-0.962683	0.0172253
880	ALDH2	ENSG00000111275	253.981	-0.508126	0.0172253
881	―	ENSG00000295873	31.889	-0.980614	0.0172319
882	PPP1R13L	ENSG00000104881	46.7249	-0.952001	0.0173253
883	―	ENSG00000293512	16.5304	-1.59913	0.017361
884	SMN1	ENSG00000172062	208.293	-0.446419	0.0174355
885	NIFK	ENSG00000155438	411.526	-0.499072	0.0174689
886	RRM1	ENSG00000167325	829.847	-0.510187	0.0175286
887	―	ENSG00000278974	75.2828	-0.656149	0.0175286
888	PLEKHG3	ENSG00000126822	149.168	-0.55872	0.0175555
889	VPS9D1-AS1	ENSG00000261373	67.2105	-0.913435	0.0175833
890	MPRIP	ENSG00000133030	1792.34	-0.319107	0.0178135
891	TCF7	ENSG00000081059	40.9762	-0.946111	0.0178523
892	GALNT15	ENSG00000131386	107.093	-0.605939	0.0180084
893	GGCT	ENSG00000006625	204.51	-0.604626	0.0180496
894	LRRC42	ENSG00000116212	481.021	-0.413234	0.0180736
895	ATP6V1D	ENSG00000100554	708.224	-0.435188	0.0181462
896	―	ENSG00000267175	158.084	-0.824919	0.0181702
897	DCBLD1	ENSG00000164465	466.322	-0.431321	0.0183551
898	WDR77	ENSG00000116455	725.756	-0.44261	0.018363
899	WNT9A	ENSG00000143816	143.268	-0.533319	0.0184203
900	TLNRD1	ENSG00000140406	270.572	-0.417688	0.0184588
901	MCTS2	ENSG00000101898	100.127	-0.539584	0.0185535
902	―	ENSG00000307976	8.84567	-1.71392	0.0185535
903	OGDH	ENSG00000105953	1998.57	-0.409531	0.0186417
904	SCLT1	ENSG00000151466	90.5786	-0.663211	0.0188243
905	MRPL39	ENSG00000154719	180.081	-0.460251	0.0188888
906	SNCG	ENSG00000173267	17.4999	-1.6125	0.0189919
907	NDUFAF5	ENSG00000101247	123.491	-0.520906	0.0189971
908	―	ENSG00000297649	18.0974	-1.77014	0.0189971
909	―	ENSG00000279821	90.4861	-0.794327	0.0190435
910	UPP1	ENSG00000183696	743.863	-0.932697	0.0190558
911	PMPCA	ENSG00000165688	1045.22	-0.716768	0.0191954
912	―	ENSG00000279822	16.5394	-1.06636	0.0192963
913	―	ENSG00000279504	8.88483	-4.79024	0.0194996
914	PPP1R14A	ENSG00000167641	17.8958	-1.36097	0.0195794
915	NLE1	ENSG00000073536	226.732	-0.418333	0.0195884
916	TPD52	ENSG00000076554	4.85405	-2.17037	0.0195884
917	CENPH	ENSG00000153044	57.6171	-0.888073	0.0196484
918	NECTIN4	ENSG00000143217	13.5365	-2.09585	0.0196922
919	EIF2B5	ENSG00000145191	441.7	-0.339997	0.0198083
920	PNO1	ENSG00000115946	187.119	-0.525154	0.019814
921	RCL1	ENSG00000120158	93.2915	-0.485514	0.019814
922	METTL2B	ENSG00000165055	215.767	-0.348466	0.019814
923	CLPB	ENSG00000162129	174.215	-0.420507	0.0198416
924	ROBO4	ENSG00000154133	75.0749	-0.740481	0.0198552
925	MAD2L1	ENSG00000164109	124.927	-0.933562	0.0199627
926	TBC1D22A-DT	ENSG00000260708	12.2677	-1.19014	0.0199627
927	RASIP1	ENSG00000105538	31.746	-1.05357	0.019976
928	RTN4R	ENSG00000040608	32.0043	-1.25348	0.0200022
929	NUP88	ENSG00000108559	549.033	-0.36796	0.0201292
930	EIF5A	ENSG00000132507	5947.27	-0.724483	0.0201962
931	ITGA5	ENSG00000161638	6421.08	-0.420206	0.0202585
932	GALE	ENSG00000117308	349.78	-0.462963	0.0204328
933	PAM16	ENSG00000217930	167.245	-1.1431	0.0209805
934	TTF1	ENSG00000125482	71.3588	-0.486907	0.0212688
935	NFIB	ENSG00000147862	3.78286	-3.15528	0.0213205
936	GATAD2A	ENSG00000167491	832.685	-0.347515	0.0213205
937	―	ENSG00000308247	8.07064	-3.12444	0.0213205
938	―	ENSG00000275464	145.376	-0.505422	0.0215253
939	―	ENSG00000254458	55.222	-0.668173	0.0216877
940	RPL39L	ENSG00000163923	176.494	-0.957455	0.0217963
941	H3C8	ENSG00000273983	5.05569	-4.6386	0.0219553
942	NCAPD2	ENSG00000010292	486.752	-0.587124	0.0222163
943	SNRPG	ENSG00000143977	443.363	-0.570169	0.022349
944	―	ENSG00000272622	41.8355	-1.17405	0.0223627
945	SRPRA	ENSG00000182934	2389.37	-0.249068	0.0223691
946	NEBL	ENSG00000078114	3.31121	-2.41506	0.0223985
947	ISL1	ENSG00000016082	27.9005	-0.920096	0.0224931
948	DNTTIP2	ENSG00000067334	367.842	-0.56085	0.0224931
949	RBM14	ENSG00000239306	754.849	-0.404679	0.0227197
950	BCL2L12	ENSG00000126453	333.171	-0.837787	0.0227505
951	TIMM8A	ENSG00000126953	99.2678	-0.844693	0.0229142
952	THOC7	ENSG00000163634	314.003	-0.546258	0.0229142
953	CDCA7L	ENSG00000164649	546.717	-0.306938	0.0229142
954	NUP62	ENSG00000213024	931.1	-0.301581	0.0231115
955	POLR2D	ENSG00000144231	407.618	-0.305006	0.0231432
956	TMEM177	ENSG00000144120	95.2019	-0.552466	0.0231543
957	BUD31	ENSG00000106245	764.399	-0.990314	0.0232527
958	―	ENSG00000289044	5.05616	-2.75086	0.0233292
959	CCDC77	ENSG00000120647	94.1955	-0.598049	0.0235865
960	LETM1	ENSG00000168924	654.415	-0.453551	0.0236
961	EXO5	ENSG00000164002	100.173	-0.522192	0.0236295
962	―	ENSG00000295821	18.042	-1.12658	0.0236295
963	CKS2	ENSG00000123975	325.879	-0.59854	0.0237354
964	SAAL1	ENSG00000166788	143.478	-0.523353	0.0237358
965	DDX1	ENSG00000079785	1108.1	-0.34012	0.0237398
966	DBF4B	ENSG00000161692	181.948	-0.607866	0.0237977
967	UQCRC1	ENSG00000010256	2030.84	-0.664506	0.024025
968	PPIF	ENSG00000108179	2108.67	-0.416901	0.0240301
969	SNX15	ENSG00000110025	249.94	-0.456119	0.0240659
970	CEP152	ENSG00000103995	43.731	-0.661192	0.0241258
971	NYAP1	ENSG00000166924	4.05447	-2.03459	0.0241258
972	CDH2	ENSG00000170558	158.404	-0.825126	0.0241258
973	HNRNPA3	ENSG00000170144	2363.75	-0.399325	0.0242169
974	FKBP5	ENSG00000096060	225.106	-0.640497	0.0242175
975	MIR503HG	ENSG00000223749	795.463	-0.611469	0.0242742
976	NGLY1	ENSG00000151092	221.612	-0.432183	0.0244221
977	TNC	ENSG00000041982	814.724	-0.827968	0.0245948
978	ATF4	ENSG00000128272	4226.4	-0.590111	0.0245948
979	DUS3L	ENSG00000141994	135.371	-0.619265	0.0246462
980	PGP	ENSG00000184207	441.479	-0.788537	0.025128
981	SLC25A5	ENSG00000005022	1613.53	-0.396328	0.0251502
982	PTER	ENSG00000165983	28.2024	-0.878795	0.0251934
983	BOK	ENSG00000176720	479.941	-0.679557	0.0252937
984	BMP6	ENSG00000153162	5.8932	-1.88656	0.0256438
985	ING2	ENSG00000168556	149.258	-0.583869	0.0257271
986	DHX30	ENSG00000132153	647.03	-0.331697	0.0257606
987	SNHG3	ENSG00000242125	493.791	-0.534236	0.0258692
988	SLC25A17	ENSG00000100372	278.178	-0.420756	0.0258825
989	CPSF3	ENSG00000119203	356.516	-0.330403	0.0258825
990	ACTN1	ENSG00000072110	8564.06	-0.425211	0.0259074
991	DNAJC11	ENSG00000007923	919.131	-0.32566	0.0260649
992	PIM1	ENSG00000137193	42.4797	-0.609594	0.0260649
993	EIF2B1	ENSG00000111361	600.932	-0.283007	0.0263487
994	NDUFV2	ENSG00000178127	571.002	-0.620661	0.0266211
995	SFMBT2	ENSG00000198879	4.39031	-2.6165	0.0266344
996	―	ENSG00000279443	7.11111	-1.70673	0.0268161
997	DSN1	ENSG00000149636	182.057	-0.532046	0.0268684
998	CCDC18	ENSG00000122483	46.7291	-0.835392	0.0269109
999	SLX9	ENSG00000160256	143.631	-1.11205	0.0269607
1000	ATG3	ENSG00000144848	418.33	-0.331236	0.0269653
1001	DLST	ENSG00000119689	1630.39	-0.401833	0.0270881
1002	UTP14A	ENSG00000156697	262.896	-0.42478	0.0271442
1003	WDR5	ENSG00000196363	741.555	-0.475544	0.0271971
1004	U2AF1	ENSG00000160201	613.654	-0.595908	0.027239
1005	ENSA	ENSG00000143420	1176.58	-0.291736	0.027539
1006	PSMD7	ENSG00000103035	864.858	-0.363318	0.0275662
1007	AARS2	ENSG00000124608	187.605	-0.430872	0.0275791
1008	INTS12	ENSG00000138785	171.74	-0.37804	0.027658
1009	MYCBP	ENSG00000214114	225.776	-0.599476	0.027658
1010	RPL13AP7	ENSG00000213885	85.0112	-1.61051	0.0277299
1011	SIPA1L3	ENSG00000105738	533.931	-0.736014	0.0277506
1012	RADIL	ENSG00000157927	22.319	-1.00816	0.0279055
1013	RPA2	ENSG00000117748	431.505	-0.323452	0.027933
1014	KGD4	ENSG00000134056	126.37	-0.586931	0.0279751
1015	CAVIN1	ENSG00000177469	19684.1	-0.809849	0.0280235
1016	DGCR8	ENSG00000128191	623.442	-0.494677	0.0281526
1017	MYC	ENSG00000136997	488.87	-0.528052	0.0281782
1018	DHCR24	ENSG00000116133	7190.02	-0.341312	0.0281886
1019	RAB20	ENSG00000139832	21.6494	-1.53162	0.0281886
1020	GINS4	ENSG00000147536	133.093	-0.686379	0.0282129
1021	LMNA	ENSG00000160789	13047.2	-0.79404	0.0282129
1022	ANXA2	ENSG00000182718	32660	-0.425777	0.0282924
1023	ZNF560	ENSG00000198028	47.1162	-0.67821	0.0283725
1024	NSDHL	ENSG00000147383	919.453	-0.582016	0.0285648
1025	GMPS	ENSG00000163655	659.231	-0.328913	0.0285856
1026	ARHGAP11A-SCG5	ENSG00000288864	13.7014	-3.95376	0.0286138
1027	EIF3B	ENSG00000106263	3125.89	-0.59234	0.0287739
1028	PSMA4	ENSG00000041357	883.194	-0.535262	0.0288103
1029	MICAL1	ENSG00000135596	1118.94	-0.604186	0.0291409
1030	KIF11	ENSG00000138160	201.079	-0.888401	0.0292508
1031	MASTL	ENSG00000120539	162.734	-0.6563	0.0295925
1032	PTGER4	ENSG00000171522	33.5972	-1.0288	0.0295925
1033	CCDC8	ENSG00000169515	227.146	-0.414261	0.0297699
1034	LINC00311	ENSG00000179219	13.2664	-2.19752	0.029785
1035	EIF4G1	ENSG00000114867	4858.8	-0.359925	0.0298848
1036	SRF	ENSG00000112658	1204.33	-0.366066	0.0299888
1037	PCOLCE2	ENSG00000163710	3.8495	-3.81726	0.0299888
1038	PCDHGA3	ENSG00000254245	88.2821	-1.37678	0.030001
1039	CACNA2D3	ENSG00000157445	34.1224	-0.807049	0.0302549
1040	DUS2	ENSG00000167264	232.067	-0.870369	0.0302644
1041	TRIOBP	ENSG00000100106	2210	-0.399332	0.0305245
1042	FZD8	ENSG00000177283	137.767	-0.622613	0.0307001
1043	SERBP1	ENSG00000142864	1672.24	-0.445524	0.0307494
1044	SF3B3	ENSG00000189091	2144.1	-0.242838	0.0309431
1045	PPIAP22	ENSG00000198618	395.791	-0.794977	0.0309431
1046	FH	ENSG00000091483	825.623	-0.468948	0.0310863
1047	DUSP10	ENSG00000143507	332.701	-0.470702	0.0311442
1048	YBX1	ENSG00000065978	7201.95	-0.424316	0.0311527
1049	NUP85	ENSG00000125450	511.014	-0.463701	0.0311899
1050	PDXP	ENSG00000241360	232.45	-0.625597	0.0311899
1051	KRT8	ENSG00000170421	172.236	-0.759455	0.0313103
1052	LEO1	ENSG00000166477	211.174	-0.529077	0.0315856
1053	KRT19	ENSG00000171345	721.696	-0.972276	0.0316807
1054	KIF18A	ENSG00000121621	42.0255	-1.16833	0.031683
1055	ARC	ENSG00000198576	4.25504	-1.90371	0.0316844
1056	RTEL1	ENSG00000258366	244.582	-1.01438	0.0316844
1057	TBCE	ENSG00000284770	345.776	-0.370853	0.0316844
1058	PSMD6	ENSG00000163636	625.677	-0.382384	0.0316879
1059	METTL22	ENSG00000067365	297.612	-0.533855	0.0318514
1060	INKA2-AS1	ENSG00000227811	32.8062	-0.750107	0.0318655
1061	CLUH	ENSG00000132361	923.626	-0.738143	0.0320056
1062	CD163	ENSG00000177575	10.6742	-1.32966	0.0320952
1063	TMEM97	ENSG00000109084	1245.21	-0.389649	0.0321099
1064	PRPS1	ENSG00000147224	642.993	-0.423548	0.0321169
1065	SRSF2	ENSG00000161547	1817.62	-0.457361	0.0323153
1066	EVA1C	ENSG00000166979	100.29	-0.892218	0.0324877
1067	ILF3	ENSG00000129351	2650.18	-0.25355	0.0324924
1068	MEAK7	ENSG00000140950	499.73	-0.318196	0.0326638
1069	―	ENSG00000229771	19.2463	-1.0743	0.0326729
1070	TMEM201	ENSG00000188807	374.138	-0.495527	0.0327177
1071	APBA2	ENSG00000034053	503.689	-0.509776	0.0328751
1072	DESI1	ENSG00000100418	889.562	-0.276485	0.032906
1073	AREG	ENSG00000109321	19.1732	-0.99279	0.0331972
1074	―	ENSG00000302344	16.9327	-0.938325	0.0332989
1075	TMEM40	ENSG00000088726	8.21909	-1.25337	0.0333982
1076	TIMM23	ENSG00000265354	821.966	-0.490804	0.0334543
1077	NDUFA4L2	ENSG00000185633	29.2131	-1.08664	0.0334803
1078	BAIAP3	ENSG00000007516	7.64967	-1.29099	0.0335329
1079	NDOR1	ENSG00000188566	469.468	-0.499001	0.0335892
1080	SYNE2	ENSG00000054654	105.618	-0.815124	0.033749
1081	VDAC3	ENSG00000078668	923.945	-0.392385	0.033749
1082	ADA2	ENSG00000093072	89.0894	-0.533711	0.033749
1083	―	ENSG00000286070	307.634	-0.938751	0.0337512
1084	MPP4	ENSG00000082126	50.5412	-0.732843	0.0337651
1085	HNRNPC	ENSG00000092199	4730.44	-0.342455	0.0337968
1086	RPA3	ENSG00000106399	108.682	-0.874832	0.0339275
1087	HK1	ENSG00000156515	1912.54	-0.297381	0.0339585
1088	PWP2	ENSG00000241945	184.515	-0.458077	0.0340482
1089	IL17RD	ENSG00000144730	50.9527	-0.832324	0.0342636
1090	GMEB1	ENSG00000162419	171.822	-0.32932	0.034368
1091	PUF60	ENSG00000179950	2108.48	-0.984283	0.0343684
1092	―	ENSG00000235070	4.05172	-3.0232	0.034681
1093	GRB10	ENSG00000106070	406.279	-0.380218	0.034764
1094	TEDC2	ENSG00000162062	86.13	-0.94247	0.0348545
1095	ABTB2	ENSG00000166016	78.5395	-0.678027	0.0348741
1096	FAM83G	ENSG00000188522	406.642	-0.740579	0.0349981
1097	PSMA2	ENSG00000106588	769.825	-0.525617	0.035003
1098	ZNF225-AS1	ENSG00000186019	31.4777	-1.65985	0.0350862
1099	TAGLN2	ENSG00000158710	7149.81	-0.709717	0.0354402
1100	SNORD3D	ENSG00000281000	430.441	-4.28869	0.0354652
1101	UQCRFS1	ENSG00000169021	1036.35	-0.362329	0.0356047
1102	CSE1L	ENSG00000124207	930.397	-0.516513	0.03567
1103	ATP5PB	ENSG00000116459	1355.3	-0.388532	0.0356943
1104	SHANK2	ENSG00000162105	3.70241	-3.35488	0.0358881
1105	YRDC	ENSG00000196449	147.631	-0.555093	0.0358881
1106	AK2	ENSG00000004455	1418.01	-0.273547	0.0362191
1107	FGFRL1	ENSG00000127418	359.808	-0.347332	0.0362272
1108	TMCC1-DT	ENSG00000271270	18.2913	-1.10878	0.0362566
1109	HMOX2	ENSG00000103415	703.165	-0.783627	0.0364255
1110	IL17RA	ENSG00000177663	607.083	-0.264645	0.036651
1111	CORO1C	ENSG00000110880	5233.68	-0.435608	0.0366754
1112	LINC01116	ENSG00000163364	182.459	-0.408585	0.0369016
1113	TADA2A	ENSG00000276234	142.624	-0.404074	0.0370452
1114	KCNMB4	ENSG00000135643	142.719	-0.505393	0.0371594
1115	PITRM1	ENSG00000107959	1471.17	-0.347619	0.0372323
1116	SF3B6	ENSG00000115128	590.388	-0.514238	0.0372323
1117	CCNO	ENSG00000152669	4.42404	-3.02245	0.0372323
1118	IL31RA	ENSG00000164509	49.3735	-0.794875	0.0372323
1119	FBXO5	ENSG00000112029	55.2046	-1.0071	0.0374754
1120	CDC123	ENSG00000151465	901.331	-0.316137	0.0375494
1121	SMURF1	ENSG00000198742	411.63	-0.356907	0.0376579
1122	ABHD11	ENSG00000106077	142.511	-0.642854	0.0378487
1123	AKAP8	ENSG00000105127	265.684	-0.419469	0.0378628
1124	NT5C	ENSG00000125458	314.216	-0.842109	0.0378628
1125	COL7A1	ENSG00000114270	6896.57	-0.906347	0.0382175
1126	MED24	ENSG00000008838	942.818	-0.338754	0.0382435
1127	LINC02984	ENSG00000237807	6.88205	-1.42749	0.0383458
1128	MRPL48	ENSG00000175581	163.968	-0.479792	0.0389412
1129	ANLN	ENSG00000011426	437.218	-1.05941	0.0391048
1130	STMN2	ENSG00000104435	10.294	-3.05013	0.0391357
1131	ECI1	ENSG00000167969	359.447	-0.653032	0.0391525
1132	ERRFI1	ENSG00000116285	502.421	-0.905596	0.0397408
1133	VPS37C	ENSG00000167987	474.722	-0.3185	0.0397408
1134	MBD2	ENSG00000134046	482.534	-0.417278	0.0400623
1135	ESCO2	ENSG00000171320	36.7196	-0.929671	0.0401076
1136	RAD51C	ENSG00000108384	155.459	-0.392457	0.040205
1137	TMEM106A	ENSG00000184988	204.484	-0.478769	0.0404245
1138	SFPQ	ENSG00000116560	2166.6	-0.347305	0.0404945
1139	ARPC2	ENSG00000163466	5434.71	-0.322232	0.0404945
1140	TPM4	ENSG00000167460	11780.9	-0.397948	0.0404945
1141	TRBC1	ENSG00000211751	3.6656	-2.10145	0.0407184
1142	ATP5F1B	ENSG00000110955	7468.7	-0.338676	0.040827
1143	IER3	ENSG00000137331	530.773	-0.39011	0.041293
1144	ADGRE5	ENSG00000123146	1829.94	-0.38453	0.0416
1145	TNIP2	ENSG00000168884	396.064	-0.504687	0.0416928
1146	PUDP	ENSG00000130021	175.382	-0.332716	0.0418888
1147	ECD	ENSG00000122882	370.465	-0.283658	0.0420235
1148	NDUFA12	ENSG00000184752	369.763	-0.54066	0.0423089
1149	BRIP1	ENSG00000136492	70.0444	-0.70633	0.0424759
1150	RPPH1	ENSG00000277209	368.728	-3.89103	0.0426175
1151	SYNGR3	ENSG00000127561	12.581	-1.19405	0.0426963
1152	TUBA1B-AS1	ENSG00000258017	6751.89	-1.03898	0.0426963
1153	SPATS2L	ENSG00000196141	1542.81	-0.37522	0.0427754
1154	―	ENSG00000305513	55.2832	-0.775879	0.0427754
1155	TPI1	ENSG00000111669	8147.1	-0.755871	0.0428499
1156	―	ENSG00000299339	3.88607	-1.97754	0.0428499
1157	TTK	ENSG00000112742	54.0206	-1.02002	0.0431345
1158	WDR74	ENSG00000133316	376.8	-0.976563	0.0431345
1159	EIF4A3	ENSG00000141543	912.985	-0.330408	0.0432663
1160	C16orf74	ENSG00000154102	37.9041	-0.922325	0.0432663
1161	ANAPC15	ENSG00000110200	332.979	-0.919245	0.0432857
1162	―	ENSG00000287222	21.6824	-0.939918	0.0432857
1163	RAD51AP1	ENSG00000111247	48.32	-1.09184	0.0434277
1164	NOP2	ENSG00000111641	446.01	-0.563545	0.0437656
1165	CPNE7	ENSG00000178773	416.669	-1.00201	0.0438305
1166	ADAMTSL1	ENSG00000178031	87.7523	-0.610773	0.0439129
1167	―	ENSG00000282304	8.37213	-4.98751	0.0439301
1168	PSMC1	ENSG00000100764	1260.45	-0.619928	0.0440633
1169	KCNAB3	ENSG00000170049	93.3947	-0.429203	0.0440633
1170	CDK5RAP2	ENSG00000136861	560.048	-0.245394	0.0444727
1171	CDK2	ENSG00000123374	499.99	-0.620632	0.0446565
1172	ZNF93	ENSG00000184635	47.9286	-0.490742	0.0448087
1173	PSAT1	ENSG00000135069	703.694	-0.605077	0.0450917
1174	RINL	ENSG00000187994	10.5216	-1.2108	0.0451445
1175	TSR1	ENSG00000167721	627.225	-0.443944	0.0452133
1176	PDLIM5	ENSG00000163110	733.806	-0.67812	0.0454275
1177	MPZ	ENSG00000158887	19.3876	-0.889073	0.0454946
1178	DNAH2	ENSG00000183914	4.28766	-1.983	0.0455634
1179	NLN	ENSG00000123213	512.9	-0.438858	0.0456211
1180	ELMO3	ENSG00000102890	17.5907	-1.53852	0.0457314
1181	DAP3	ENSG00000132676	929.294	-0.283367	0.0460403
1182	LSG1	ENSG00000041802	428.766	-0.325631	0.0462763
1183	POLR3C	ENSG00000186141	411.013	-0.322595	0.0463271
1184	LINC00857	ENSG00000237523	40.0104	-0.662395	0.0463271
1185	POLR3K	ENSG00000161980	178.822	-0.66754	0.0465651
1186	PPM1G	ENSG00000115241	1651.11	-0.825922	0.0465916
1187	MCM8	ENSG00000125885	138.775	-0.631658	0.0465916
1188	PARK7	ENSG00000116288	2027.93	-0.540385	0.0466018
1189	COQ3	ENSG00000132423	58.7254	-0.537144	0.0466018
1190	EIF4EBP1	ENSG00000187840	539.396	-0.946351	0.0467533
1191	SNHG12	ENSG00000197989	291.835	-0.58385	0.0467571
1192	SELENOS	ENSG00000131871	946.815	-0.47766	0.0467931
1193	OXTR	ENSG00000180914	2158.82	-0.371029	0.0468481
1194	ACTB	ENSG00000075624	54246.7	-0.426433	0.0469469
1195	THSD1	ENSG00000136114	122.649	-0.455794	0.047142
1196	MDN1-AS1	ENSG00000228124	3.56139	-1.91656	0.0474151
1197	INA	ENSG00000148798	20.6165	-0.74836	0.0476378
1198	PSPC1	ENSG00000121390	327.723	-0.325728	0.0476858
1199	SET	ENSG00000119335	2783.42	-0.310127	0.048084
1200	RBM19	ENSG00000122965	391.935	-0.388836	0.048084
1201	XPO6	ENSG00000169180	2718.69	-0.310727	0.048084
1202	PI4KB	ENSG00000143393	2303.03	-0.365423	0.0481686
1203	―	ENSG00000204745	29.007	-0.805738	0.0482919
1204	GRWD1	ENSG00000105447	565.506	-0.600198	0.0486227
1205	CANT1	ENSG00000171302	1384.47	-0.433192	0.0489384
1206	TKT	ENSG00000163931	5731.87	-0.324009	0.0490119
1207	C1QTNF2	ENSG00000145861	67.4462	-0.70506	0.049115
1208	CCNE1	ENSG00000105173	99.6873	-0.419596	0.0493395
1209	DDX31	ENSG00000125485	235.057	-0.279089	0.0494615
1210	ASL	ENSG00000126522	650.588	-0.697386	0.0495051
1211	CFL1	ENSG00000172757	20056	-0.518595	0.0497984
1212	TOP3A	ENSG00000177302	375.202	-0.303795	0.0498536
1213	NFATC2	ENSG00000101096	4.3364	-2.87077	0.0499476

## Sheet: MvsO(O↑)
	Supplementary Table S4C.
	DEGs in NHDFs (padj < 0.05).
	Gene name	Ensembl ID	baseMean	log2FC	padj
1	OAS2	ENSG00000111335	741.805	5.24628	6.95611e-203
2	MMP3	ENSG00000149968	2104.82	4.71137	2.4506e-190
3	PTGS1	ENSG00000095303	1893.62	2.45202	4.63104e-166
4	IL13RA2	ENSG00000123496	275.818	6.20047	1.17578e-153
5	COLEC10	ENSG00000184374	188.764	4.89487	1.93301e-141
6	GPC6	ENSG00000183098	291.981	6.45522	3.17528e-135
7	CDH6	ENSG00000113361	225.785	5.5911	3.31589e-134
8	USP18	ENSG00000184979	303.021	4.25683	4.95532e-122
9	APCDD1	ENSG00000154856	3476.39	2.63665	2.54781e-121
10	TSPAN11	ENSG00000110900	108.702	4.73513	8.66762e-115
11	MX1	ENSG00000157601	3684.27	4.36298	1.09268e-112
12	IFIT1	ENSG00000185745	1222.13	4.58169	6.76419e-103
13	MX2	ENSG00000183486	508.008	5.17421	7.49826e-103
14	TFPI2	ENSG00000105825	702.364	5.06989	1.46155e-99
15	HERC6	ENSG00000138642	605.981	3.81227	3.64464e-98
16	DDX10	ENSG00000178105	389.287	1.99203	5.65102e-96
17	IFIT3	ENSG00000119917	1131.81	3.451	9.64837e-91
18	RIGI	ENSG00000107201	591.073	3.20307	2.31714e-90
19	OAS3	ENSG00000111331	1441.76	4.15419	3.96963e-89
20	KCNJ6	ENSG00000157542	237.447	3.43046	4.56165e-85
21	HERC5	ENSG00000138646	129.389	4.47506	3.61878e-84
22	ITIH5	ENSG00000123243	579.577	2.97327	6.90589e-81
23	CASP1	ENSG00000137752	861.643	2.1907	1.22846e-78
24	INSC	ENSG00000188487	110.291	6.56449	5.72446e-78
25	SLC47A1	ENSG00000142494	77.0316	5.51556	9.69729e-77
26	STC2	ENSG00000113739	4337.71	1.64617	2.46172e-75
27	ACKR3	ENSG00000144476	184.214	4.47836	1.63557e-73
28	ELN	ENSG00000049540	937.288	3.40084	2.85786e-70
29	GREM2	ENSG00000180875	167.966	4.33775	9.91449e-70
30	ANKFN1	ENSG00000153930	67.0691	4.2528	2.71656e-67
31	SEPTIN3	ENSG00000100167	70.7584	3.75711	1.85365e-62
32	CMPK2	ENSG00000134326	144.204	7.34302	3.24632e-62
33	SERPINE2	ENSG00000135919	18622.8	3.16655	7.74072e-62
34	KPRP	ENSG00000203786	1267.33	5.70287	1.0101e-61
35	FMOD	ENSG00000122176	898.259	2.27606	1.49479e-61
36	IFI44L	ENSG00000137959	440.929	6.35495	5.2237e-60
37	PDE1C	ENSG00000154678	306.234	3.25547	4.41699e-59
38	EPSTI1	ENSG00000133106	209.767	2.5568	1.93404e-58
39	IFI44	ENSG00000137965	358.901	3.87107	1.07126e-57
40	CLIC2	ENSG00000155962	51.4945	4.16506	6.74568e-57
41	DPT	ENSG00000143196	86.2409	3.98413	9.69219e-57
42	RSAD2	ENSG00000134321	149.546	7.98455	1.32683e-56
43	NTN1	ENSG00000065320	175.701	3.70409	1.96396e-55
44	STOM	ENSG00000148175	1782.61	1.59867	6.31845e-54
45	OAS1	ENSG00000089127	788.392	7.00148	2.79732e-52
46	ABCG1	ENSG00000160179	54.8395	4.0384	1.53854e-51
47	EMB	ENSG00000170571	129.432	4.32548	4.24407e-51
48	―	ENSG00000261786	108.825	3.45858	2.6383e-50
49	COLEC12	ENSG00000158270	129.187	4.10898	3.06003e-50
50	NCAM1	ENSG00000149294	89.744	3.33213	3.94552e-50
51	SOD3	ENSG00000109610	5547.29	4.49582	9.18677e-50
52	LINC00649	ENSG00000237945	60.7066	4.09278	4.26857e-49
53	BMP4	ENSG00000125378	795.165	2.40785	5.01271e-48
54	CCDC184	ENSG00000177875	72.3797	3.5996	6.7335e-48
55	―	ENSG00000278932	98.6604	4.10587	9.07919e-48
56	GL000214.1	ENSG00000303221	56.1589	3.52488	1.01548e-46
57	COMP	ENSG00000105664	123.11	4.0904	1.6749e-46
58	BST2	ENSG00000130303	1591.73	6.53408	2.09203e-46
59	NETO1	ENSG00000166342	78.4057	6.19139	3.50379e-46
60	CCL5	ENSG00000271503	65.7687	4.4625	4.55495e-46
61	MMP1	ENSG00000196611	4320.98	2.25888	1.97079e-45
62	ANO3	ENSG00000134343	81.1118	5.0607	2.33939e-45
63	MAP6	ENSG00000171533	148.422	2.09024	1.91857e-44
64	APBB1IP	ENSG00000077420	103.33	2.789	5.23217e-44
65	FOXQ1	ENSG00000164379	69.6015	3.1731	9.5945e-44
66	SYNM	ENSG00000182253	184.602	3.07126	1.63448e-43
67	SYT17	ENSG00000103528	43.1558	3.92952	7.74167e-42
68	RETREG1	ENSG00000154153	40.5343	3.13124	5.3768e-41
69	PLCB4	ENSG00000101333	126.357	3.4074	5.14968e-40
70	PTPRN2	ENSG00000155093	63.8889	2.97316	7.77033e-40
71	KYNU	ENSG00000115919	132.729	3.01944	1.56189e-39
72	GDNF	ENSG00000168621	39.7102	4.15285	3.8863e-39
73	IFI6	ENSG00000126709	3880.11	4.26477	5.23225e-39
74	A2M	ENSG00000175899	63.9801	3.14725	5.35111e-39
75	EPDR1	ENSG00000086289	275.698	2.85829	8.41923e-39
76	RTN4RL1	ENSG00000185924	63.8915	3.72825	2.0897e-38
77	CSGALNACT1	ENSG00000147408	39.9095	3.76524	2.53882e-38
78	COLGALT2	ENSG00000198756	63.9197	2.64905	2.84185e-38
79	RFLNA	ENSG00000178882	42.3396	4.22044	3.37973e-38
80	NRK	ENSG00000123572	140.814	4.81685	1.04922e-37
81	KCNS3	ENSG00000170745	79.4208	2.02888	1.05114e-37
82	ACSL5	ENSG00000197142	31.6882	3.97806	2.94235e-37
83	FAM89A	ENSG00000182118	178.939	2.18164	5.61415e-37
84	RAB38	ENSG00000123892	123.981	2.32882	1.09623e-36
85	OLFML2B	ENSG00000162745	168.032	2.12021	1.11776e-36
86	LRATD2	ENSG00000168672	103.206	3.45229	3.13325e-36
87	LPL	ENSG00000175445	85.4589	7.90731	6.89633e-36
88	IFIT2	ENSG00000119922	330.597	3.62532	7.46688e-36
89	PLXNA2	ENSG00000076356	112.667	2.66375	1.14368e-35
90	TM4SF1	ENSG00000169908	143.264	2.45653	1.38541e-35
91	SLC12A7	ENSG00000113504	218.437	1.341	1.64933e-35
92	IGFBP3	ENSG00000146674	2719.27	2.03778	8.07401e-35
93	GL000214.1	ENSG00000303173	44.957	2.64838	8.12223e-35
94	CDK18	ENSG00000117266	32.7781	4.64691	1.48306e-34
95	SERPINB2	ENSG00000197632	375.91	4.71469	1.6116e-34
96	SP110	ENSG00000135899	312.63	1.40104	7.31591e-34
97	OASL	ENSG00000135114	89.2416	5.58733	1.28621e-33
98	PMEPA1	ENSG00000124225	73.9475	2.54674	1.33358e-33
99	SYT11	ENSG00000132718	650.95	1.43487	4.24649e-33
100	CAMK4	ENSG00000152495	99.341	2.36514	5.68992e-33
101	GRAMD1B	ENSG00000023171	137.869	2.08639	1.43429e-32
102	RGS20	ENSG00000147509	81.1525	2.45236	1.81702e-32
103	PAG1	ENSG00000076641	422.983	3.08892	2.67715e-32
104	KRT40	ENSG00000204889	38.7092	6.10896	5.25303e-32
105	ALDH3A2	ENSG00000072210	401.04	1.36567	9.74147e-32
106	CGREF1	ENSG00000138028	39.8721	3.29678	1.02705e-31
107	PLBD1	ENSG00000121316	111.74	2.13967	1.25574e-31
108	PRELP	ENSG00000188783	426.142	2.44216	2.48304e-31
109	HOXD3	ENSG00000128652	100.952	1.78244	3.38375e-31
110	HELZ2	ENSG00000130589	678.508	1.99071	3.55493e-31
111	FABP4	ENSG00000170323	103.844	3.23739	4.73109e-31
112	EFHD1	ENSG00000115468	70.8618	2.29641	5.70176e-31
113	ATP10A	ENSG00000206190	133.023	1.94765	7.81516e-31
114	―	ENSG00000290397	103.657	4.5097	8.51015e-31
115	COL15A1	ENSG00000204291	843.258	3.04243	1.00663e-30
116	LIPG	ENSG00000101670	56.2664	3.48913	1.19036e-30
117	PARP14	ENSG00000173193	933.231	1.34308	1.37014e-30
118	BMP2	ENSG00000125845	293.346	2.38904	3.43092e-30
119	ALDH3A1	ENSG00000108602	377.479	3.168	3.72437e-30
120	KI270751.1	ENSG00000303902	60.6806	4.08209	4.03024e-30
121	CADM1	ENSG00000182985	44.9726	2.9948	4.7994e-30
122	NRXN3	ENSG00000021645	30.9001	4.60917	1.04224e-29
123	HPSE	ENSG00000173083	44.4446	2.64302	2.15543e-29
124	NFASC	ENSG00000163531	118.21	1.88193	2.50277e-29
125	ISM1	ENSG00000101230	92.8763	4.72676	3.18151e-29
126	IFIH1	ENSG00000115267	247.438	2.92405	3.65288e-29
127	C1orf226	ENSG00000239887	28.4319	3.70646	4.14619e-29
128	GDF6	ENSG00000156466	41.8169	5.42839	9.27513e-29
129	BATF2	ENSG00000168062	221.463	2.60293	1.08009e-28
130	MAPT	ENSG00000186868	61.6597	2.05885	1.17506e-28
131	INHBA	ENSG00000122641	184.343	3.24483	2.22998e-28
132	TRIM25	ENSG00000121060	1147.7	1.54234	2.32574e-28
133	FST	ENSG00000134363	438.024	2.18395	2.57052e-28
134	CDH2	ENSG00000170558	158.404	2.99601	2.57052e-28
135	HAPLN1	ENSG00000145681	38.826	6.43621	2.57747e-28
136	TLR3	ENSG00000164342	120.034	3.45402	3.50716e-28
137	TRIM14	ENSG00000106785	579.574	2.11453	3.70541e-28
138	LCE2A	ENSG00000187173	530.584	3.72452	8.49452e-28
139	TXNIP	ENSG00000265972	5544.63	1.56173	1.46581e-27
140	MLKL	ENSG00000168404	236.356	1.46995	1.47932e-27
141	CD163L1	ENSG00000177675	214.914	1.75035	1.81097e-27
142	EPHA5	ENSG00000145242	28.7466	5.50402	2.48165e-27
143	LGALS9	ENSG00000168961	146.306	4.10872	2.98511e-27
144	FZD8	ENSG00000177283	137.767	2.25851	3.43248e-27
145	RFX8	ENSG00000196460	98.113	2.16937	3.60983e-27
146	EPHX2	ENSG00000120915	63.3671	2.73443	5.93887e-27
147	FNDC5	ENSG00000160097	36.5622	3.58122	7.36726e-27
148	SLCO3A1	ENSG00000176463	283.621	1.17298	1.31822e-26
149	XAF1	ENSG00000132530	769.645	2.4144	1.67172e-26
150	HECW1	ENSG00000002746	113.47	1.65068	1.69795e-26
151	SORL1	ENSG00000137642	43.9534	4.2406	3.1543e-26
152	WNT9A	ENSG00000143816	143.268	1.76795	3.22637e-26
153	C3orf80	ENSG00000180044	33.2279	3.06993	3.99905e-26
154	HUNK	ENSG00000142149	30.5666	5.74874	4.74601e-26
155	PAK3	ENSG00000077264	47.0762	3.23636	6.29721e-26
156	HSPB8	ENSG00000152137	323.137	1.57092	6.32581e-26
157	LINC01116	ENSG00000163364	182.459	1.47679	7.31418e-26
158	EFR3B	ENSG00000084710	32.5693	2.95992	2.03825e-25
159	RAB27B	ENSG00000041353	341.037	4.39672	3.93647e-25
160	KCNMA1	ENSG00000156113	1381.3	2.44464	5.32303e-25
161	PTGER1	ENSG00000160951	156.84	3.18131	5.94465e-25
162	PARM1	ENSG00000169116	24.9767	4.18641	1.08985e-24
163	PTPRN	ENSG00000054356	32.3894	4.16507	1.10363e-24
164	GPR37	ENSG00000170775	76.0854	3.09419	1.41489e-24
165	CXCL11	ENSG00000169248	56.3003	3.22335	1.7335e-24
166	LAP3	ENSG00000002549	791.678	1.52981	2.2566e-24
167	SLC6A17	ENSG00000197106	212.038	2.27118	2.53162e-24
168	PARD6G	ENSG00000178184	138.445	1.91639	3.80733e-24
169	TYMS	ENSG00000176890	946.067	1.07707	4.90315e-24
170	RGS9	ENSG00000108370	40.0495	3.20787	6.13058e-24
171	SUGCT	ENSG00000175600	208.53	1.62637	7.77228e-24
172	SAMHD1	ENSG00000101347	481.236	2.13109	8.48218e-24
173	ANK1	ENSG00000029534	328.112	1.42367	1.02069e-23
174	PDPN	ENSG00000162493	230.798	1.4521	1.1043e-23
175	PTGIS	ENSG00000124212	27.198	4.19787	1.19948e-23
176	CTSH	ENSG00000103811	293.442	2.00184	1.49587e-23
177	CABLES1	ENSG00000134508	32.4298	2.55596	2.21041e-23
178	TNS1	ENSG00000079308	747.831	1.66964	2.60722e-23
179	GDA	ENSG00000119125	46.2366	2.56732	2.80953e-23
180	SMPD3	ENSG00000103056	36.1867	2.42532	3.34819e-23
181	IQCA1	ENSG00000132321	22.1552	5.46707	4.3549e-23
182	TENT5A	ENSG00000112773	312.778	1.33552	4.37559e-23
183	FAIM2	ENSG00000135472	89.1006	2.18358	6.48569e-23
184	IFITM1	ENSG00000185885	2535.46	3.38967	9.11223e-23
185	TDRD7	ENSG00000196116	224.144	1.54213	1.11234e-22
186	KIAA0040	ENSG00000235750	33.1012	3.12766	1.1709e-22
187	HAGLR	ENSG00000224189	96.5801	2.22809	1.25572e-22
188	AIF1L	ENSG00000126878	31.1146	3.32184	1.27302e-22
189	LRATD1	ENSG00000162981	1254.8	1.65519	1.51014e-22
190	HTR2A	ENSG00000102468	18.9172	4.29733	1.68513e-22
191	PLPP3	ENSG00000162407	805.258	3.18817	1.78564e-22
192	MGAT5B	ENSG00000167889	140.911	1.7235	2.07667e-22
193	NLRP1	ENSG00000091592	191.216	1.77798	2.54911e-22
194	PARP9	ENSG00000138496	457.741	2.02249	3.56971e-22
195	TNFSF18	ENSG00000120337	189.235	1.85678	4.04061e-22
196	PLXDC2	ENSG00000120594	302.956	1.6217	4.41728e-22
197	ITGBL1	ENSG00000198542	967.374	2.03682	5.45689e-22
198	LAPTM5	ENSG00000162511	34.9851	2.93963	6.26023e-22
199	ELMO1	ENSG00000155849	21.4337	5.87321	7.91619e-22
200	STEAP1B	ENSG00000105889	283.113	1.90125	9.25513e-22
201	KI270751.1	ENSG00000303867	22.4105	4.32996	9.62166e-22
202	SEMA4D	ENSG00000187764	21.2746	3.35568	1.25519e-21
203	GL000008.2	ENSG00000296775	24.9391	4.44736	1.3281e-21
204	PURPL	ENSG00000250337	187.053	3.15741	1.3679e-21
205	THBD	ENSG00000178726	60.0087	8.53737	1.42828e-21
206	―	ENSG00000247134	20.0008	5.03257	1.94634e-21
207	MAMDC2	ENSG00000165072	295.839	3.56374	2.46506e-21
208	VDR	ENSG00000111424	288.851	1.36038	3.1816e-21
209	BCL2	ENSG00000171791	63.8334	2.52355	3.33677e-21
210	ARSL	ENSG00000157399	78.9063	1.84155	4.25067e-21
211	ANKRD29	ENSG00000154065	94.3518	2.27545	5.52733e-21
212	SPAG5	ENSG00000076382	320.479	1.01232	6.76849e-21
213	NAAA	ENSG00000138744	455.949	1.38079	6.89968e-21
214	RRAGD	ENSG00000025039	17.8894	5.08897	8.84137e-21
215	RNF213	ENSG00000173821	2575.12	1.62782	1.11379e-20
216	CDH3	ENSG00000062038	26.8542	3.21281	1.14039e-20
217	SDR42E1	ENSG00000184860	34.5551	2.37955	1.18869e-20
218	RAB31	ENSG00000168461	527.72	1.16483	2.19306e-20
219	DOCK2	ENSG00000134516	96.4396	1.67827	4.35545e-20
220	LINC00517	ENSG00000259091	60.6252	2.23964	4.92966e-20
221	C1QTNF2	ENSG00000145861	67.4462	2.30732	5.22902e-20
222	PENK	ENSG00000181195	101.144	1.93784	5.50585e-20
223	TSPAN15	ENSG00000099282	187.335	1.94139	6.08393e-20
224	APOBEC3G	ENSG00000239713	133.537	1.57585	6.12222e-20
225	BTG3	ENSG00000154640	396.585	1.16783	8.1018e-20
226	CTSC	ENSG00000109861	3601.29	1.19423	8.85637e-20
227	IP6K3	ENSG00000161896	179.182	1.22844	1.06453e-19
228	SYBU	ENSG00000147642	43.5646	2.92509	1.09958e-19
229	NDN	ENSG00000182636	98.5494	1.8541	1.10144e-19
230	H3-7	ENSG00000273213	139.855	1.34867	2.04752e-19
231	SFRP2	ENSG00000145423	54.6337	6.36617	2.79758e-19
232	HOXD4	ENSG00000170166	130.975	1.80321	3.44848e-19
233	FAM149A	ENSG00000109794	36.7083	2.1935	3.71548e-19
234	XYLT1	ENSG00000103489	181.619	2.34447	4.47375e-19
235	CNTN1	ENSG00000018236	41.5501	4.42237	4.61113e-19
236	KIAA1671	ENSG00000197077	85.6006	2.29815	5.21486e-19
237	MBNL3	ENSG00000076770	150.077	3.15993	6.06544e-19
238	PDE1A	ENSG00000115252	109.432	2.00402	6.23095e-19
239	CIART	ENSG00000159208	83.306	1.74558	6.36949e-19
240	GALNT12	ENSG00000119514	19.4134	3.08646	6.61049e-19
241	DTX4	ENSG00000110042	803.002	1.84119	8.51849e-19
242	TRPC4	ENSG00000133107	22.241	3.87951	8.60186e-19
243	GALNT16	ENSG00000100626	104.169	1.49663	9.33962e-19
244	MCF2L	ENSG00000126217	42.1297	2.49662	1.13211e-18
245	GBP4	ENSG00000162654	17.5417	3.08072	1.2447e-18
246	KI270744.1	ENSG00000300074	19.5531	5.58355	1.40726e-18
247	ST8SIA1	ENSG00000111728	79.895	1.43793	1.44386e-18
248	RASSF2	ENSG00000101265	815.314	2.20547	1.7225e-18
249	NRIP3	ENSG00000175352	136.561	1.63119	1.83692e-18
250	SRPX	ENSG00000101955	870.398	0.679258	1.85588e-18
251	SNX18P12	ENSG00000279718	18.6861	5.28743	1.86446e-18
252	CACNA1G	ENSG00000006283	26.5525	2.98077	1.90684e-18
253	SCN5A	ENSG00000183873	33.0665	3.05699	1.93313e-18
254	PPP1R14A	ENSG00000167641	17.8958	3.54366	3.06963e-18
255	GGTA1	ENSG00000204136	21.4013	3.01493	3.11236e-18
256	SOCS2	ENSG00000120833	68.6949	1.74184	3.42245e-18
257	GPAT2	ENSG00000186281	346.045	1.40243	5.99512e-18
258	CLDN23	ENSG00000253958	19.4621	4.12518	6.30674e-18
259	IFI27	ENSG00000165949	589.779	3.56829	9.09872e-18
260	FYB1	ENSG00000082074	13.7629	3.6833	9.53853e-18
261	ATP2A3	ENSG00000074370	43.0256	2.51816	1.22554e-17
262	FGF13	ENSG00000129682	21.3384	3.055	1.41156e-17
263	MAPK10	ENSG00000109339	61.3596	1.48094	1.63134e-17
264	CES3	ENSG00000172828	60.1206	4.0854	1.77078e-17
265	FGF10	ENSG00000070193	14.8781	5.18173	1.91706e-17
266	SP100	ENSG00000067066	579.413	1.30453	2.63003e-17
267	PLAU	ENSG00000122861	3931.71	0.895152	3.15828e-17
268	ZNF503	ENSG00000165655	114.224	1.87563	3.20525e-17
269	C1orf21	ENSG00000116667	230.816	1.12701	3.40841e-17
270	SEMA6D	ENSG00000137872	67.8597	3.30467	4.46719e-17
271	PNMA2	ENSG00000240694	15.5886	4.15525	4.51685e-17
272	―	ENSG00000176349	115.641	2.61061	6.77739e-17
273	GNG11	ENSG00000127920	1976.42	2.43699	6.9055e-17
274	MFAP5	ENSG00000197614	26.7047	6.61293	7.47329e-17
275	EBF4	ENSG00000088881	176.176	2.43052	7.53008e-17
276	KCNA3	ENSG00000177272	24.7737	2.69005	9.81783e-17
277	CCN3	ENSG00000136999	230.504	2.39831	1.36549e-16
278	PDZD4	ENSG00000067840	65.5849	2.03677	1.4381e-16
279	GABBR2	ENSG00000136928	189.265	2.18742	2.04172e-16
280	CTSS	ENSG00000163131	111.967	1.45861	2.29136e-16
281	CD36	ENSG00000135218	113.209	2.58985	2.42417e-16
282	PALMD	ENSG00000099260	43.0301	1.96378	2.5267e-16
283	DTX3L	ENSG00000163840	467.925	1.30289	2.5267e-16
284	DDX60L	ENSG00000181381	930.213	2.818	2.62477e-16
285	KCNQ3	ENSG00000184156	92.1131	2.20907	2.65781e-16
286	TENM3	ENSG00000218336	40.3561	2.82749	2.83123e-16
287	CACNA1A	ENSG00000141837	272.612	2.05271	4.53835e-16
288	IFITM10	ENSG00000244242	31.1722	3.17399	5.08703e-16
289	IDO1	ENSG00000131203	21.1908	6.4486	5.59977e-16
290	―	ENSG00000301873	19.2972	2.80816	5.65335e-16
291	ADAM23	ENSG00000114948	248.603	1.30443	6.23491e-16
292	TACR1	ENSG00000115353	18.4814	5.60507	7.28008e-16
293	CEND1	ENSG00000184524	67.5923	2.84068	7.98412e-16
294	BDNF	ENSG00000176697	320.507	1.40426	8.05965e-16
295	NCAM2	ENSG00000154654	13.3375	4.26473	8.50958e-16
296	NALF1	ENSG00000204442	454.229	1.74862	8.82937e-16
297	CIT	ENSG00000122966	606.248	1.57321	8.91172e-16
298	SHISAL1	ENSG00000138944	29.208	2.55291	9.71058e-16
299	IFIT5	ENSG00000152778	328.614	1.30407	9.76946e-16
300	NPR3	ENSG00000113389	79.0016	2.17865	1.01247e-15
301	TMEM176A	ENSG00000002933	3061.24	2.31881	1.08278e-15
302	KCNF1	ENSG00000162975	13.0896	3.82019	1.17285e-15
303	PARP12	ENSG00000059378	491.246	1.84124	1.22484e-15
304	RHOJ	ENSG00000126785	26.3053	2.22663	1.26946e-15
305	C11orf87	ENSG00000185742	44.1782	2.43322	1.56506e-15
306	CYP4V2	ENSG00000145476	253.131	1.40471	2.0615e-15
307	TMEM229B	ENSG00000198133	42.059	2.27111	2.17041e-15
308	NEURL1B	ENSG00000214357	163.888	1.06696	2.19098e-15
309	SLC43A3	ENSG00000134802	470.269	0.941704	2.54341e-15
310	LCE2C	ENSG00000187180	17.8446	5.20476	2.74213e-15
311	SAMD9	ENSG00000205413	305.269	2.88215	3.13054e-15
312	CTSK	ENSG00000143387	6066.07	0.891599	4.15091e-15
313	TPX2	ENSG00000088325	708.653	0.72027	4.29421e-15
314	EPHA5-AS1	ENSG00000250846	15.1896	3.28117	4.82751e-15
315	SOX9	ENSG00000125398	44.7773	2.69674	5.17805e-15
316	MPP4	ENSG00000082126	50.5412	1.95343	5.27888e-15
317	KIF4A	ENSG00000090889	184.976	0.981544	6.86188e-15
318	SLC37A1	ENSG00000160190	18.7312	2.55462	7.13172e-15
319	TMEM150C	ENSG00000249242	30.9871	3.12991	7.22884e-15
320	DHRS7	ENSG00000100612	1265.99	0.846962	7.42044e-15
321	STBD1	ENSG00000118804	282.988	1.16352	8.12405e-15
322	ADCY1	ENSG00000164742	19.8138	3.10551	8.28022e-15
323	NMRAL2P	ENSG00000290862	152.977	0.944088	9.40887e-15
324	HTRA3	ENSG00000170801	49.7789	2.73075	9.54653e-15
325	IRF7	ENSG00000185507	189.14	2.56811	1.19352e-14
326	PFKP	ENSG00000067057	544.824	0.827135	1.19507e-14
327	SLC8A1	ENSG00000183023	229.259	2.25297	1.30293e-14
328	CA12	ENSG00000074410	163.07	1.21544	1.4431e-14
329	PTGDR2	ENSG00000183134	24.9598	2.96919	1.66265e-14
330	GREB1L	ENSG00000141449	57.8493	2.02043	1.71037e-14
331	NR1D1	ENSG00000126368	185.706	1.6342	1.78784e-14
332	PCLO	ENSG00000186472	30.1698	2.69802	1.88737e-14
333	PLCE1	ENSG00000138193	57.7837	1.91349	2.00042e-14
334	DACT1	ENSG00000165617	15.9717	2.97543	2.11677e-14
335	NPNT	ENSG00000168743	23.0292	4.95313	2.11677e-14
336	ADRB2	ENSG00000169252	45.8882	2.51819	2.365e-14
337	PTN	ENSG00000105894	618.181	1.60268	2.41013e-14
338	DUSP15	ENSG00000149599	23.7115	5.06163	2.70025e-14
339	Y	ENSG00000286050	12.1474	5.33487	2.70864e-14
340	NPTXR	ENSG00000221890	198.569	1.21071	2.85254e-14
341	RASGRF2	ENSG00000113319	441.958	1.25792	2.90569e-14
342	MAN1C1	ENSG00000117643	116.611	1.55845	3.25724e-14
343	PGM5	ENSG00000154330	104.933	1.32697	3.6251e-14
344	ZNF804A	ENSG00000170396	59.3888	1.63248	3.6251e-14
345	SRGAP3	ENSG00000196220	44.6995	3.88885	3.71413e-14
346	DTL	ENSG00000143476	213.125	1.26003	3.90754e-14
347	CHST11	ENSG00000171310	57.95	2.12051	4.38655e-14
348	CRISPLD1	ENSG00000121005	26.9451	7.83827	4.4553e-14
349	MGAT3	ENSG00000128268	118.169	1.70461	5.13043e-14
350	BISPR	ENSG00000282851	12.3515	3.56664	5.60474e-14
351	SCD5	ENSG00000145284	437.01	1.76526	5.80312e-14
352	PSD4	ENSG00000125637	79.8308	1.32701	8.16933e-14
353	E2F7	ENSG00000165891	266.688	2.84322	9.08321e-14
354	ISL1	ENSG00000016082	27.9005	2.17821	1.03995e-13
355	B4GALNT3	ENSG00000139044	10.6706	4.47441	1.04422e-13
356	PTPRO	ENSG00000151490	16.6899	4.12367	1.09216e-13
357	ENTREP1	ENSG00000135063	14.7222	3.50639	1.09487e-13
358	SPRY2	ENSG00000136158	626.622	1.95618	1.17234e-13
359	ZNFX1	ENSG00000124201	1274.05	1.10079	1.20721e-13
360	―	ENSG00000258875	15.4343	2.59312	1.21522e-13
361	FGF2	ENSG00000138685	593.106	2.02653	1.22512e-13
362	EDN1	ENSG00000078401	18.1861	3.37458	1.22648e-13
363	PCDH7	ENSG00000169851	151.391	2.19058	1.29678e-13
364	LINC01133	ENSG00000224259	29.5474	2.35684	1.37378e-13
365	KCNJ2	ENSG00000123700	24.3793	2.8105	1.40223e-13
366	DDX60	ENSG00000137628	369.873	3.14399	1.40331e-13
367	GNA14	ENSG00000156049	31.7682	2.41462	1.45316e-13
368	PDE6B	ENSG00000133256	14.8168	3.28335	1.79439e-13
369	KCNE4	ENSG00000152049	219.221	2.57322	1.92632e-13
370	SULF2	ENSG00000196562	819.57	1.23044	1.94541e-13
371	RUNX1	ENSG00000159216	561.594	0.969773	2.08067e-13
372	LINC01915	ENSG00000265485	12.3075	5.35993	2.19607e-13
373	HGF	ENSG00000019991	767.525	2.63018	2.24737e-13
374	PEAR1	ENSG00000187800	49.9518	3.065	2.86915e-13
375	ASPN	ENSG00000106819	91.3592	2.35088	2.90093e-13
376	―	ENSG00000289384	56.0236	1.72726	2.97504e-13
377	SH2D4A	ENSG00000104611	275.64	0.892374	3.00709e-13
378	PCDHGA3	ENSG00000254245	88.2821	3.53364	3.44102e-13
379	CPE	ENSG00000109472	298.798	1.87362	3.4584e-13
380	HAS2	ENSG00000170961	25.9194	2.49235	3.53189e-13
381	SECTM1	ENSG00000141574	566.963	2.08103	3.71639e-13
382	PBX3	ENSG00000167081	305.244	1.21764	3.86575e-13
383	LAMA3	ENSG00000053747	124.897	1.94821	3.97618e-13
384	TDO2	ENSG00000151790	17.0463	3.08218	4.70752e-13
385	FERMT1	ENSG00000101311	85.1842	2.36253	4.73951e-13
386	TNFAIP2	ENSG00000185215	376.06	0.864542	4.76658e-13
387	SOX6	ENSG00000110693	26.4045	2.01246	4.86746e-13
388	PTPRE	ENSG00000132334	33.0152	2.24716	4.95483e-13
389	GRIA4	ENSG00000152578	12.226	5.50729	5.34667e-13
390	HMMR	ENSG00000072571	81.7564	2.25676	6.22484e-13
391	CYP2J2	ENSG00000134716	37.2986	2.08663	6.35162e-13
392	TRPC3	ENSG00000138741	23.0369	2.61788	6.51235e-13
393	EIF2AK2	ENSG00000055332	1174.87	2.16431	6.85512e-13
394	LINC01705	ENSG00000232679	30.8111	2.29617	8.25859e-13
395	STXBP5-AS1	ENSG00000233452	32.7799	1.95497	8.34117e-13
396	SUSD2	ENSG00000099994	47.492	2.00992	8.36415e-13
397	PADI2	ENSG00000117115	12.8272	5.09957	8.40456e-13
398	ITGA10	ENSG00000143127	67.3798	2.03967	8.59842e-13
399	ESPL1	ENSG00000135476	178.14	1.15429	9.42415e-13
400	KIRREL3	ENSG00000149571	186.659	1.51131	9.76316e-13
401	VSTM4	ENSG00000165633	126.866	1.05593	1.22347e-12
402	SLC24A3	ENSG00000185052	18.5487	3.80758	1.23446e-12
403	TLR5	ENSG00000187554	15.7427	3.12584	1.27181e-12
404	RIPOR3	ENSG00000042062	94.0755	1.21222	1.41036e-12
405	KLHL3	ENSG00000146021	39.0908	1.79175	1.48351e-12
406	LINP1	ENSG00000223784	19.3652	2.75331	1.4939e-12
407	SMS	ENSG00000102172	579.089	0.916135	1.51746e-12
408	FGR	ENSG00000000938	21.4314	2.72182	1.5567e-12
409	ADAR	ENSG00000160710	3621.53	0.882606	1.58782e-12
410	MMP16	ENSG00000156103	155.339	2.3261	1.87543e-12
411	NMNAT2	ENSG00000157064	68.4189	2.08247	1.93252e-12
412	MTSS2	ENSG00000132613	1467.97	0.841671	2.09017e-12
413	SORBS2	ENSG00000154556	16.1606	3.96347	2.44835e-12
414	CELSR1	ENSG00000075275	61.724	1.64268	2.48277e-12
415	FBXO15	ENSG00000141665	16.5608	2.28281	2.49484e-12
416	MIR3659HG	ENSG00000224592	15.0561	3.26135	2.51633e-12
417	ADAMTS19	ENSG00000145808	241.805	2.3782	3.01378e-12
418	CCDC194	ENSG00000269720	24.6097	7.75477	3.13494e-12
419	GPC4	ENSG00000076716	11.881	5.86438	3.25362e-12
420	IRF9	ENSG00000213928	728.196	1.50177	3.25362e-12
421	OLFML1	ENSG00000183801	93.9468	1.17363	3.81954e-12
422	CARD9	ENSG00000187796	249.395	1.54183	4.01808e-12
423	BUB1	ENSG00000169679	191.182	1.50194	4.62247e-12
424	PRC1	ENSG00000198901	595.666	0.868336	4.86236e-12
425	GPR27	ENSG00000170837	11.4499	3.6839	5.10169e-12
426	IQGAP3	ENSG00000183856	428.207	0.989019	5.16306e-12
427	HEYL	ENSG00000163909	40.7071	1.43289	5.38292e-12
428	DEPTOR	ENSG00000155792	27.6784	1.97622	5.79465e-12
429	FABP5	ENSG00000164687	133.831	2.06377	6.18689e-12
430	GL000218.1	ENSG00000301761	29.4363	1.8092	6.5147e-12
431	ABCA3	ENSG00000167972	33.0357	1.79494	6.67495e-12
432	CPPED1	ENSG00000103381	762.289	0.869125	6.82511e-12
433	GAD1	ENSG00000128683	12.0672	4.72434	6.98182e-12
434	TRIM69	ENSG00000185880	293.829	1.47516	7.35423e-12
435	FANCI	ENSG00000140525	319.176	0.981661	8.33062e-12
436	RRM2	ENSG00000171848	763.932	1.02668	8.42871e-12
437	―	ENSG00000274718	19.4855	2.13243	9.09184e-12
438	MSR1	ENSG00000038945	13.0038	4.11991	9.53249e-12
439	DLG3	ENSG00000082458	206.274	0.792523	9.70482e-12
440	CSMD3	ENSG00000164796	29.0225	8.50019	9.72262e-12
441	KCNB1	ENSG00000158445	11.4843	3.06004	1.1089e-11
442	―	ENSG00000287839	325.871	0.956138	1.13454e-11
443	PBK	ENSG00000168078	143.154	1.95316	1.18477e-11
444	ISG15	ENSG00000187608	1307.56	3.46306	1.42554e-11
445	―	ENSG00000294734	1542.78	3.71303	1.46833e-11
446	LIPC	ENSG00000166035	35.8568	1.58909	1.4709e-11
447	PPFIA2	ENSG00000139220	12.1693	5.5137	1.50672e-11
448	NETO1-DT	ENSG00000263958	10.2347	5.32615	1.5098e-11
449	SHISA9	ENSG00000237515	18.5891	3.12292	1.66105e-11
450	CDS1	ENSG00000163624	10.2701	3.29289	1.67617e-11
451	SLITRK1	ENSG00000178235	153.322	1.62594	1.80624e-11
452	KALRN	ENSG00000160145	22.5336	2.2011	1.99457e-11
453	ANKRD1	ENSG00000148677	13.1626	3.54503	2.47071e-11
454	GARNL3	ENSG00000136895	31.7812	1.73685	2.55113e-11
455	SAMD9L	ENSG00000177409	640.91	2.16208	2.61339e-11
456	TMEM62	ENSG00000137842	263.428	1.12281	2.69447e-11
457	INSYN2B	ENSG00000204767	21.5307	2.67752	2.7575e-11
458	PLSCR1	ENSG00000188313	192.18	1.85728	2.80532e-11
459	HJURP	ENSG00000123485	206.193	1.00573	2.81132e-11
460	UNC13A	ENSG00000130477	10.8989	5.58082	2.92249e-11
461	GPNMB	ENSG00000136235	3765.91	1.17455	3.27768e-11
462	PAPPA	ENSG00000182752	636.673	2.32132	3.48637e-11
463	CXCL8	ENSG00000169429	282.16	2.87471	3.71215e-11
464	GINS1	ENSG00000101003	94.5733	1.10908	3.71363e-11
465	SCN2A	ENSG00000136531	118.115	2.33706	4.10942e-11
466	APOL6	ENSG00000221963	475.355	1.48633	4.50177e-11
467	CRIP1	ENSG00000213145	391.302	3.23889	4.65526e-11
468	ENOX1	ENSG00000120658	43.7039	1.47166	4.78172e-11
469	DHRS2	ENSG00000100867	22.3971	6.57771	6.23851e-11
470	SRXN1	ENSG00000271303	1401.24	0.837279	6.27145e-11
471	CLCN4	ENSG00000073464	58.7052	1.92725	6.32073e-11
472	IL1RN	ENSG00000136689	10.4637	5.62625	6.32651e-11
473	MASTL	ENSG00000120539	162.734	1.51593	7.8992e-11
474	DGKA	ENSG00000065357	1705.94	0.900523	8.29894e-11
475	PCGF5	ENSG00000180628	197.006	1.47014	9.33936e-11
476	CCNB1	ENSG00000134057	691.145	0.981895	1.05902e-10
477	TFCP2L1	ENSG00000115112	8.53037	4.2389	1.06622e-10
478	BTG1	ENSG00000133639	817.007	1.67609	1.10625e-10
479	TRIM67	ENSG00000119283	14.1196	6.92392	1.14151e-10
480	AMPH	ENSG00000078053	9.83487	5.4571	1.2164e-10
481	NCALD	ENSG00000104490	60.6148	1.51381	1.28341e-10
482	C1R	ENSG00000159403	3115.58	1.31779	1.35837e-10
483	WDFY2	ENSG00000139668	168.726	1.14576	1.38555e-10
484	PHLDA1	ENSG00000139289	2697.92	1.2586	1.52504e-10
485	NDRG4	ENSG00000103034	170.373	1.19373	1.56041e-10
486	TEK	ENSG00000120156	59.3129	2.33785	1.69748e-10
487	―	ENSG00000303714	11.8519	3.00779	1.76435e-10
488	―	ENSG00000308375	22.2312	2.2775	1.8829e-10
489	DSG2	ENSG00000046604	87.5575	3.22913	1.92163e-10
490	AARD	ENSG00000205002	13.6308	3.07133	2.08861e-10
491	NGF	ENSG00000134259	14.983	3.44309	2.15396e-10
492	CBLN2	ENSG00000141668	12.483	2.98542	2.18298e-10
493	ETS2	ENSG00000157557	1168.49	1.25618	2.39468e-10
494	CD7	ENSG00000173762	25.7053	3.09731	2.4845e-10
495	TAFA2	ENSG00000198673	11.1739	2.74526	2.4845e-10
496	DUSP10	ENSG00000143507	332.701	1.07245	2.6006e-10
497	LBH	ENSG00000213626	607.544	1.00352	2.6006e-10
498	ERFE	ENSG00000178752	15.1439	2.7399	2.72093e-10
499	CACNA1H	ENSG00000196557	225.073	1.07411	2.76338e-10
500	ITGA8	ENSG00000077943	40.9674	2.07328	2.82265e-10
501	CXorf38	ENSG00000185753	238.982	1.04821	3.02496e-10
502	ICOSLG	ENSG00000160223	119.771	1.32484	3.08625e-10
503	H1-0	ENSG00000189060	1732.48	0.948228	3.13419e-10
504	FENDRR	ENSG00000268388	342.687	1.14227	3.33169e-10
505	ST6GALNAC5	ENSG00000117069	21.6806	2.09648	3.41937e-10
506	FAM174B	ENSG00000185442	20.0816	2.19618	3.58233e-10
507	ETV7	ENSG00000010030	44.3935	2.0556	3.8717e-10
508	ID4	ENSG00000172201	8.94678	3.78031	3.93497e-10
509	ACACB	ENSG00000076555	88.8652	1.3411	3.96993e-10
510	TAFA5	ENSG00000219438	10.262	5.97983	3.97683e-10
511	KCNH1	ENSG00000143473	19.3921	3.11456	4.29405e-10
512	REC8	ENSG00000100918	266.278	1.27714	4.62042e-10
513	CKB	ENSG00000166165	355.682	2.28552	4.92208e-10
514	DPY19L2	ENSG00000177990	116	1.58453	5.04769e-10
515	RBPMS2	ENSG00000166831	20.1644	2.4524	5.80535e-10
516	POSTN	ENSG00000133110	205.796	1.91531	6.00539e-10
517	IL22RA1	ENSG00000142677	8.48525	3.32302	6.10646e-10
518	LPCAT2	ENSG00000087253	142.473	2.28646	6.16867e-10
519	GHR	ENSG00000112964	40.4927	2.72289	6.17669e-10
520	IL17D	ENSG00000172458	50.0282	1.43244	6.3044e-10
521	TUSC1	ENSG00000198680	108.877	1.09061	6.58651e-10
522	EDNRB	ENSG00000136160	8.06377	5.24964	7.21963e-10
523	RTP4	ENSG00000136514	54.4559	2.01452	7.50004e-10
524	―	ENSG00000248015	18.849	2.29591	7.83511e-10
525	LAPTM4B	ENSG00000104341	500.629	0.717358	7.97795e-10
526	PPARGC1A	ENSG00000109819	19.1046	2.29208	8.0159e-10
527	CDHR3	ENSG00000128536	49.6821	1.25738	8.38623e-10
528	TRIM34	ENSG00000258659	99.8986	1.34809	8.38623e-10
529	THBS1-IT1	ENSG00000276107	90.5436	1.01017	8.45419e-10
530	ASXL3	ENSG00000141431	16.7029	1.90899	8.539e-10
531	GYPE	ENSG00000197465	22.8958	1.68784	8.63057e-10
532	SLC25A4	ENSG00000151729	201.625	0.837592	8.99069e-10
533	TYW3	ENSG00000162623	188.338	1.01261	9.38792e-10
534	GCA	ENSG00000115271	27.6365	1.68929	9.47299e-10
535	STUM	ENSG00000203685	17.1958	2.78649	9.58197e-10
536	ANXA3	ENSG00000138772	54.8887	1.85925	9.60451e-10
537	LINC01291	ENSG00000204792	10.3932	3.65411	9.61118e-10
538	CDK1	ENSG00000170312	187.035	1.65658	9.77394e-10
539	―	ENSG00000291089	81.1982	1.8652	1.04761e-09
540	ATCAY	ENSG00000167654	9.77664	5.9112	1.09355e-09
541	IDH3A	ENSG00000166411	394.147	0.747143	1.09411e-09
542	MANCR	ENSG00000231298	17.0763	2.02939	1.12133e-09
543	ARNT2	ENSG00000172379	178.399	1.06593	1.16066e-09
544	CDC6	ENSG00000094804	238.416	0.816061	1.1653e-09
545	RNF144A	ENSG00000151692	69.9449	1.90898	1.21804e-09
546	VCAN	ENSG00000038427	525.333	2.3926	1.22577e-09
547	ANO8	ENSG00000074855	96.6855	1.0226	1.32518e-09
548	PTGER3	ENSG00000050628	11.2231	6.60884	1.38716e-09
549	MTHFD2	ENSG00000065911	463.416	1.4433	1.50192e-09
550	NAT1	ENSG00000171428	49.4043	1.70651	1.52767e-09
551	SALL1	ENSG00000103449	468.123	1.91585	1.62298e-09
552	DEPDC7	ENSG00000121690	139.817	1.45538	1.76951e-09
553	FZD1	ENSG00000157240	208.241	1.52029	1.90887e-09
554	EYA4	ENSG00000112319	14.0465	3.08898	1.91371e-09
555	GRP	ENSG00000134443	159.783	1.62062	2.00042e-09
556	AFF2	ENSG00000155966	10.9524	4.43747	2.0048e-09
557	MLH3	ENSG00000119684	212.268	0.653259	2.03678e-09
558	MLLT11	ENSG00000213190	251.202	0.940104	2.0529e-09
559	DDIT4L	ENSG00000145358	105.073	1.61664	2.07857e-09
560	HOXD1	ENSG00000128645	16.7806	2.56354	2.15699e-09
561	SMTNL1	ENSG00000214872	11.1686	2.64067	2.1843e-09
562	SBSPON	ENSG00000164764	12.8363	2.88209	2.29285e-09
563	ASIC4	ENSG00000072182	7.23568	4.16225	2.33956e-09
564	ST6GALNAC3	ENSG00000184005	7.6011	4.80094	2.42165e-09
565	MACROH2A2	ENSG00000099284	80.9277	1.24263	2.55391e-09
566	PKNOX2	ENSG00000165495	10.4795	2.90161	2.55892e-09
567	SEC14L4	ENSG00000133488	14.6425	2.75367	2.58019e-09
568	KCNS2	ENSG00000156486	78.638	1.51397	2.72734e-09
569	ZFPM2-AS1	ENSG00000251003	16.6709	2.76589	2.75683e-09
570	PNPT1	ENSG00000138035	230.559	1.54071	3.00605e-09
571	FHOD3	ENSG00000134775	258.002	1.37261	3.1407e-09
572	SESN3	ENSG00000149212	86.4417	2.31841	3.3715e-09
573	IL21R	ENSG00000103522	13.0833	3.45842	3.57717e-09
574	FBXO41	ENSG00000163013	125.208	0.943762	3.75155e-09
575	CDCA2	ENSG00000184661	96.4647	1.12233	3.87648e-09
576	NKX3-1	ENSG00000167034	13.6068	3.45555	3.93143e-09
577	ANKRD6	ENSG00000135299	13.6733	2.41442	3.96847e-09
578	LDLRAD4	ENSG00000168675	9.98206	4.5802	4.12455e-09
579	ADRA2A	ENSG00000150594	7.79525	3.52386	4.50634e-09
580	CLSTN2	ENSG00000158258	9.58345	2.85398	4.8973e-09
581	SHISA3	ENSG00000178343	14.8801	7.48264	5.34506e-09
582	GADD45A	ENSG00000116717	888.476	0.943241	5.58962e-09
583	TMEM178B	ENSG00000261115	64.4312	2.10081	5.65348e-09
584	STMN2	ENSG00000104435	10.294	6.36245	5.84552e-09
585	DHX58	ENSG00000108771	338.683	1.15926	5.95188e-09
586	CFAP263	ENSG00000103021	118.275	0.880097	6.02876e-09
587	HSPA12A	ENSG00000165868	455.256	0.99808	6.08335e-09
588	SKA3	ENSG00000165480	112.46	1.26692	6.09352e-09
589	GTSE1	ENSG00000075218	161.136	1.15011	6.4046e-09
590	PRLR	ENSG00000113494	25.0179	2.51628	6.51352e-09
591	―	ENSG00000279333	22.6267	3.32849	6.61367e-09
592	PDE2A	ENSG00000186642	9.28883	2.87115	7.24532e-09
593	GBP1P1	ENSG00000290525	9.79697	4.16052	7.31894e-09
594	PRR5L	ENSG00000135362	42.1301	1.46869	7.43507e-09
595	KATNAL2	ENSG00000167216	99.3563	0.986893	7.63964e-09
596	EGFL6	ENSG00000198759	7.77714	5.14676	7.93883e-09
597	POU2AF3	ENSG00000214290	8.65507	3.1023	7.94017e-09
598	LGR5	ENSG00000139292	13.705	7.4057	8.17918e-09
599	NECTIN4	ENSG00000143217	13.5365	3.97673	8.18307e-09
600	STYK1	ENSG00000060140	7.13932	3.73606	8.20167e-09
601	KIF20B	ENSG00000138182	87.313	1.53552	8.26174e-09
602	CAVIN2	ENSG00000168497	182.993	1.82064	8.54816e-09
603	FAR2P2	ENSG00000290596	13.9011	2.17808	9.98407e-09
604	AGPAT5	ENSG00000155189	138.952	1.8513	1.0583e-08
605	HPGD	ENSG00000164120	23.1726	8.75357	1.06589e-08
606	PRKG2	ENSG00000138669	9.28222	6.30058	1.11777e-08
607	RTTN	ENSG00000176225	104.421	0.977212	1.12495e-08
608	SLC39A8	ENSG00000138821	121.783	1.92808	1.14155e-08
609	PDE3B	ENSG00000152270	18.9078	3.36859	1.18375e-08
610	SETBP1	ENSG00000152217	59.649	1.55259	1.21993e-08
611	SLC16A14	ENSG00000163053	26.1534	2.34453	1.24233e-08
612	AMIGO2	ENSG00000139211	172.913	1.56661	1.42036e-08
613	MPV17L	ENSG00000156968	23.1273	1.8073	1.47471e-08
614	CCNB2	ENSG00000157456	268.797	0.777186	1.51396e-08
615	ENTPD1	ENSG00000138185	186.624	0.971506	1.54147e-08
616	PDK4	ENSG00000004799	25.7972	3.6403	1.54802e-08
617	HK2	ENSG00000159399	405.3	1.37801	1.57541e-08
618	H4C8	ENSG00000158406	101.062	1.47726	1.73978e-08
619	EEPD1	ENSG00000122547	150.639	0.867072	1.8213e-08
620	PDE6B-AS1	ENSG00000242686	11.9118	7.20334	1.89003e-08
621	ZDHHC13	ENSG00000177054	113.145	1.26635	1.9173e-08
622	PRXL2A	ENSG00000122378	283.024	0.750867	2.05552e-08
623	THEMIS2	ENSG00000130775	126.363	0.918516	2.12232e-08
624	FBXO39	ENSG00000177294	7.2095	4.07435	2.13834e-08
625	MFHAS1	ENSG00000147324	155.419	1.08639	2.15029e-08
626	CCDC68	ENSG00000166510	53.0941	1.8894	2.21286e-08
627	CENPH	ENSG00000153044	57.6171	1.67569	2.27981e-08
628	RIMBP3	ENSG00000275793	18.9763	2.06952	2.35014e-08
629	IFI16	ENSG00000163565	1052.55	1.06558	2.39541e-08
630	LIMCH1	ENSG00000064042	222.598	1.75754	2.49329e-08
631	CREG1	ENSG00000143162	478.283	1.14103	2.5725e-08
632	―	ENSG00000262580	105.916	0.983801	2.60405e-08
633	PELI2	ENSG00000139946	28.9052	1.52347	2.60564e-08
634	DISP2	ENSG00000140323	119.16	1.07206	2.73871e-08
635	PGR	ENSG00000082175	18.375	2.12331	2.7435e-08
636	SLC7A11	ENSG00000151012	2876.89	1.41923	2.89646e-08
637	GL000009.2	ENSG00000278704	15.0529	5.68201	2.92176e-08
638	SPOCK3	ENSG00000196104	6.47178	4.67874	2.97255e-08
639	RORA	ENSG00000069667	41.8642	1.89158	2.98477e-08
640	PPFIA4	ENSG00000143847	115.932	1.09789	3.0252e-08
641	STAT2	ENSG00000170581	3190.14	0.833043	3.07213e-08
642	STK32B	ENSG00000152953	345.939	0.999118	3.13844e-08
643	UBE2T	ENSG00000077152	135.91	1.13082	3.19218e-08
644	SCFD2	ENSG00000184178	418.126	0.547814	3.21771e-08
645	TTC39B	ENSG00000155158	113.087	1.36327	3.26847e-08
646	NPAS3	ENSG00000151322	13.7423	2.31945	3.33214e-08
647	NPC1L1	ENSG00000015520	13.2838	2.35544	3.4601e-08
648	TRIM21	ENSG00000132109	516.437	0.961948	3.48551e-08
649	TMEM178A	ENSG00000152154	93.1672	0.89657	3.49711e-08
650	―	ENSG00000290644	55.7171	2.09734	3.53742e-08
651	WNK3	ENSG00000196632	11.6044	2.31569	3.70702e-08
652	METTL8	ENSG00000123600	248.537	0.952822	3.75662e-08
653	SLC22A15	ENSG00000163393	157.934	1.55085	3.82393e-08
654	SEPTIN4	ENSG00000108387	11.5011	2.34927	3.83056e-08
655	IRX5	ENSG00000176842	107.814	0.936616	4.03789e-08
656	CCDC9B	ENSG00000188549	685.597	0.659557	4.04536e-08
657	ADAMTS19-AS1	ENSG00000249421	16.928	1.82538	4.17748e-08
658	―	ENSG00000265579	9.36707	5.32391	4.38816e-08
659	GOLGA8M	ENSG00000188626	62.7592	2.18543	4.40545e-08
660	C2	ENSG00000166278	13.5203	2.6981	4.44184e-08
661	LRP4	ENSG00000134569	48.5075	2.14878	4.74252e-08
662	NRG2	ENSG00000158458	6.6548	3.31096	4.74252e-08
663	RDH10	ENSG00000121039	147.516	1.24163	4.81817e-08
664	TOP2A	ENSG00000131747	582.949	1.76145	4.8723e-08
665	KRT39	ENSG00000196859	6.44184	5.27162	4.99311e-08
666	IL1RL1	ENSG00000115602	19.7439	8.47325	5.14704e-08
667	ISG20	ENSG00000172183	21.3094	1.96712	5.25178e-08
668	KCTD12	ENSG00000178695	230.693	2.0293	5.25527e-08
669	ABTB2	ENSG00000166016	78.5395	1.34806	5.26425e-08
670	TGFBR3	ENSG00000069702	551.192	1.51662	5.36158e-08
671	NDUFAF6	ENSG00000156170	141.953	0.945517	5.37743e-08
672	C4orf33	ENSG00000151470	50.3122	1.35048	5.55176e-08
673	CABCOCO1	ENSG00000183346	21.5888	1.69792	5.61146e-08
674	ITGA11	ENSG00000137809	593.156	0.955294	5.65644e-08
675	―	ENSG00000293141	105.595	1.09625	5.80866e-08
676	FRG1JP	ENSG00000307942	21.9102	2.50269	5.81068e-08
677	LRMDA	ENSG00000148655	7.48033	3.18311	6.01838e-08
678	SLC41A1	ENSG00000133065	814.22	0.96095	6.05306e-08
679	ARFGEF3	ENSG00000112379	6.66763	4.40936	6.22976e-08
680	NCAPG	ENSG00000109805	205.47	1.21109	6.45053e-08
681	LPAR3	ENSG00000171517	268.144	1.71161	6.54536e-08
682	RAB4A-AS1	ENSG00000177788	42.2121	1.24537	6.69065e-08
683	C5	ENSG00000106804	63.5574	1.37335	6.7185e-08
684	CRHBP	ENSG00000145708	9.67541	3.18842	6.88133e-08
685	FOXM1	ENSG00000111206	616.708	0.957831	6.99178e-08
686	RNF170	ENSG00000120925	313.044	0.884726	7.27693e-08
687	RORB	ENSG00000198963	7.99156	3.87717	7.38315e-08
688	MYO19	ENSG00000278259	515.304	0.597339	7.49967e-08
689	COL4A6	ENSG00000197565	172.421	1.64599	7.75318e-08
690	SNCA	ENSG00000145335	270.132	0.947893	7.89242e-08
691	BRCA1	ENSG00000012048	146.684	1.20482	7.95114e-08
692	CDO1	ENSG00000129596	13.4981	2.10012	8.09252e-08
693	DENND3	ENSG00000105339	527.831	0.797596	8.23016e-08
694	CRYZ	ENSG00000116791	208.063	2.03788	8.25289e-08
695	SMIM43	ENSG00000164112	6.50522	4.15414	8.25972e-08
696	AKAP6	ENSG00000151320	68.0226	2.13204	8.48588e-08
697	TMEM140	ENSG00000146859	221.056	0.776866	8.82001e-08
698	GADD45B	ENSG00000099860	368.869	0.98291	8.83755e-08
699	GDNF-AS1	ENSG00000248587	8.10973	2.56385	9.28805e-08
700	CENPE	ENSG00000138778	134.459	1.54528	1.08356e-07
701	GRB10	ENSG00000106070	406.279	0.752024	1.09063e-07
702	KLRF1	ENSG00000150045	7.89062	3.18737	1.12033e-07
703	ZNF195	ENSG00000005801	196.422	0.913168	1.1391e-07
704	MGME1	ENSG00000125871	218.419	0.852956	1.17514e-07
705	MCUB	ENSG00000005059	88.421	1.20241	1.18682e-07
706	CENPF	ENSG00000117724	298.109	1.25997	1.23008e-07
707	RNF180	ENSG00000164197	6.06584	4.2467	1.23614e-07
708	TRIP13	ENSG00000071539	198.941	1.00037	1.23636e-07
709	MSC-AS1	ENSG00000235531	83.4799	1.06955	1.26502e-07
710	ADORA2B	ENSG00000170425	93.6411	1.32166	1.29138e-07
711	EDIL3	ENSG00000164176	71.0417	2.11219	1.29365e-07
712	NRSN2-AS1	ENSG00000225377	59.2279	1.0032	1.30857e-07
713	CDR2	ENSG00000140743	300.215	0.829087	1.31872e-07
714	SKA1	ENSG00000154839	81.97	1.21291	1.31882e-07
715	C1S	ENSG00000182326	3713.54	0.773127	1.42202e-07
716	ENDOD1	ENSG00000149218	576.648	0.917818	1.43047e-07
717	CASP12	ENSG00000204403	7.29071	5.89323	1.43161e-07
718	SYT1	ENSG00000067715	179.915	1.59417	1.45148e-07
719	CDKL2	ENSG00000138769	18.4936	1.67691	1.45953e-07
720	SH2D5	ENSG00000189410	309.517	1.05938	1.4838e-07
721	EXOSC8	ENSG00000120699	240.36	0.776066	1.49433e-07
722	―	ENSG00000289189	14.979	2.68377	1.51857e-07
723	NME8	ENSG00000086288	6.82168	3.55436	1.5438e-07
724	C8orf48	ENSG00000164743	39.2813	1.21612	1.57594e-07
725	RAB42	ENSG00000188060	23.9564	1.56762	1.57728e-07
726	PLD6	ENSG00000179598	127.059	0.735431	1.59059e-07
727	MARCHF3	ENSG00000173926	34.836	1.38711	1.60676e-07
728	CARINH	ENSG00000197536	66.6478	1.17862	1.63083e-07
729	COPS8	ENSG00000198612	981.765	0.766138	1.70761e-07
730	EGFLAM	ENSG00000164318	10.3021	6.78812	1.71518e-07
731	FAM47E	ENSG00000189157	6.74195	3.27864	1.72267e-07
732	DGKI	ENSG00000157680	38.8491	1.35083	1.76824e-07
733	CHPT1	ENSG00000111666	383.222	1.04848	1.85007e-07
734	―	ENSG00000225886	7.17079	5.94521	1.86558e-07
735	MN1	ENSG00000169184	23.1102	1.85103	1.86802e-07
736	CDH10	ENSG00000040731	9.66715	2.24954	1.93167e-07
737	MIR100HG	ENSG00000255248	1270.39	0.883333	1.95706e-07
738	ZC3HAV1	ENSG00000105939	1017.83	0.822836	1.97597e-07
739	CNTN4	ENSG00000144619	9.04135	6.81026	2.02759e-07
740	PLPP5	ENSG00000147535	685.921	0.821939	2.03923e-07
741	SCN3B	ENSG00000166257	17.4158	2.5016	2.12841e-07
742	―	ENSG00000297027	12.3369	2.53057	2.18385e-07
743	PDZD2	ENSG00000133401	39.207	1.9063	2.23688e-07
744	GPR89A	ENSG00000117262	321.433	1.01491	2.26545e-07
745	―	ENSG00000290885	5.86132	3.4968	2.27976e-07
746	TMEM176B	ENSG00000106565	4191.83	1.74935	2.28962e-07
747	DSN1	ENSG00000149636	182.057	0.985464	2.31855e-07
748	B3GALNT1	ENSG00000169255	130.844	1.64053	2.35859e-07
749	TMEM100	ENSG00000166292	7.45314	5.44719	2.37004e-07
750	DYNC1I1	ENSG00000158560	7.02342	3.84604	2.37427e-07
751	PRKX	ENSG00000183943	156.453	0.710325	2.53364e-07
752	ARHGAP20	ENSG00000137727	95.968	2.24384	2.57483e-07
753	KIF17	ENSG00000117245	60.7272	1.32647	2.66133e-07
754	ZNF331	ENSG00000130844	148.013	1.0672	2.83047e-07
755	HSD17B7	ENSG00000132196	192.36	0.759642	2.83047e-07
756	FLRT2	ENSG00000185070	372.863	0.942674	2.87017e-07
757	KNTC1	ENSG00000184445	210.3	1.08348	2.92391e-07
758	―	ENSG00000259345	45.9569	1.34557	3.08469e-07
759	CCDC149	ENSG00000181982	239.116	0.476625	3.14429e-07
760	EPHA4	ENSG00000116106	49.7227	1.778	3.14999e-07
761	MAL2	ENSG00000147676	6.1384	4.05787	3.28626e-07
762	SHCBP1	ENSG00000171241	190.138	1.45882	3.3132e-07
763	RHBDL3	ENSG00000141314	21.115	2.27189	3.3558e-07
764	PTER	ENSG00000165983	28.2024	1.54433	3.44803e-07
765	TMEM179	ENSG00000258986	31.5585	2.40099	3.48748e-07
766	ARHGAP24	ENSG00000138639	653.631	1.21167	3.53361e-07
767	―	ENSG00000269954	57.0318	2.99967	3.53361e-07
768	PRRX1	ENSG00000116132	812.498	1.1679	3.65196e-07
769	CPQ	ENSG00000104324	842.824	0.699706	3.688e-07
770	PITPNM2	ENSG00000090975	91.2249	1.03445	3.70401e-07
771	―	ENSG00000295967	164.234	2.46976	3.70401e-07
772	STAMBPL1	ENSG00000138134	340.724	0.755721	3.73257e-07
773	―	ENSG00000293664	87.3251	0.796433	3.94242e-07
774	SLC4A4	ENSG00000080493	35.9941	2.30706	3.98209e-07
775	NHLH2	ENSG00000177551	7.6254	3.25833	4.15938e-07
776	CCDC15	ENSG00000149548	34.2429	1.6163	4.36464e-07
777	FNIP2	ENSG00000052795	147.626	1.6669	4.46261e-07
778	F7	ENSG00000057593	6.69521	3.12346	4.60763e-07
779	TSC22D3	ENSG00000157514	605.139	0.865291	4.67307e-07
780	PPP2R2B	ENSG00000156475	7.94456	6.63315	5.02667e-07
781	TSPAN33	ENSG00000158457	28.737	1.46527	5.06338e-07
782	STAT1	ENSG00000115415	5249.88	1.75312	5.31106e-07
783	NOX5	ENSG00000255346	13.7627	2.12159	5.34404e-07
784	CYFIP2	ENSG00000055163	401.275	0.944088	5.4762e-07
785	―	ENSG00000290846	423.536	0.932835	5.62771e-07
786	FICD	ENSG00000198855	225.482	0.638999	5.62971e-07
787	TMEM71	ENSG00000165071	16.3591	2.01489	5.76341e-07
788	PLK2	ENSG00000145632	647.142	0.808765	5.92428e-07
789	PTPN3	ENSG00000070159	95.6998	1.05916	5.94766e-07
790	CYP11A1	ENSG00000140459	21.7181	1.74662	5.94766e-07
791	ANXA2R-OT1	ENSG00000177738	236.706	0.672052	6.07451e-07
792	GPCPD1	ENSG00000125772	324.711	0.772707	6.07577e-07
793	SCARA5	ENSG00000168079	7.89882	6.61681	6.18201e-07
794	HAAO	ENSG00000162882	141.475	1.51961	6.50607e-07
795	PARP8	ENSG00000151883	89.0629	1.40272	6.68923e-07
796	HAUS4	ENSG00000092036	138.657	0.93672	6.86981e-07
797	SNX18P26	ENSG00000227568	6.13631	3.74055	6.86981e-07
798	PHYH	ENSG00000107537	352.843	0.693443	6.98458e-07
799	LINC02574	ENSG00000233975	6.97017	4.23483	7.01007e-07
800	CTBS	ENSG00000117151	297.309	1.03232	7.22974e-07
801	RNF19B	ENSG00000116514	199.593	0.863531	7.38337e-07
802	UHRF1	ENSG00000276043	455.12	0.66249	7.3856e-07
803	―	ENSG00000234156	5.62569	4.68439	7.76389e-07
804	FRMD6-AS2	ENSG00000258537	27.6183	1.26016	8.04702e-07
805	RAVER2	ENSG00000162437	83.5152	1.61136	8.06971e-07
806	PCDH19	ENSG00000165194	6.0339	4.25916	8.18079e-07
807	AGA-DT	ENSG00000250131	33.2627	1.21519	8.35934e-07
808	AMOT	ENSG00000126016	46.4251	1.47029	8.5621e-07
809	MSMO1	ENSG00000052802	2152.15	1.38904	8.66191e-07
810	―	ENSG00000280435	10.7857	3.29974	8.70322e-07
811	STK33	ENSG00000130413	19.2994	1.71984	8.70835e-07
812	―	ENSG00000280241	7.86964	2.97483	8.81066e-07
813	CDC7	ENSG00000097046	77.9418	1.5254	8.88958e-07
814	LETM2	ENSG00000165046	94.2883	0.863283	9.30483e-07
815	PLK4	ENSG00000142731	69.1185	1.49393	9.40062e-07
816	TIGAR	ENSG00000078237	394.114	1.28723	9.51889e-07
817	―	ENSG00000289131	5.99966	3.88271	9.52667e-07
818	OSBPL3	ENSG00000070882	688.174	1.23865	9.58626e-07
819	MC4R	ENSG00000166603	11.5179	2.87951	9.93492e-07
820	IMPA2	ENSG00000141401	434.632	0.742832	1.02143e-06
821	NIM1K	ENSG00000177453	10.8176	2.19803	1.05189e-06
822	LRRC66	ENSG00000188993	30.1032	1.54876	1.05416e-06
823	ARHGEF37	ENSG00000183111	30.7265	1.31744	1.07756e-06
824	STMN3	ENSG00000197457	410.398	0.729821	1.08024e-06
825	SHMT1	ENSG00000176974	115.656	0.830466	1.10708e-06
826	KIF18B	ENSG00000186185	180.173	0.964511	1.10744e-06
827	KCNK1	ENSG00000135750	26.9674	1.2731	1.11561e-06
828	SMAD7	ENSG00000101665	85.7803	1.009	1.12166e-06
829	CDKN3	ENSG00000100526	128.196	1.01342	1.16118e-06
830	AUTS2	ENSG00000158321	77.0506	1.67277	1.18147e-06
831	PPP4R4	ENSG00000119698	24.5413	2.73989	1.20728e-06
832	TMEM204	ENSG00000131634	156.616	1.25897	1.23522e-06
833	RNF24	ENSG00000101236	1151.12	0.735836	1.23869e-06
834	ZNF90	ENSG00000213988	25.2516	1.34419	1.29071e-06
835	MYO16	ENSG00000041515	19.0547	1.4437	1.30461e-06
836	VIPR1	ENSG00000114812	11.6369	4.24776	1.32067e-06
837	APOBEC3B	ENSG00000179750	145.585	0.835633	1.33e-06
838	ZWINT	ENSG00000122952	219.745	0.810055	1.35615e-06
839	―	ENSG00000229771	19.2463	1.85486	1.44319e-06
840	STAG3	ENSG00000066923	12.7551	1.93113	1.4458e-06
841	KLF10	ENSG00000155090	325.38	1.89395	1.46187e-06
842	LMO2	ENSG00000135363	5.86297	3.45044	1.49339e-06
843	FANCL	ENSG00000115392	154.882	1.42719	1.49837e-06
844	―	ENSG00000290537	17.4298	1.61746	1.50712e-06
845	CEP126	ENSG00000110318	70.0507	1.20593	1.51864e-06
846	PSMC3IP	ENSG00000131470	109.413	0.90987	1.56722e-06
847	ABCG2	ENSG00000118777	57.8034	1.68994	1.57939e-06
848	TYRO3	ENSG00000092445	433.232	0.576261	1.6178e-06
849	MELK	ENSG00000165304	226.934	1.0898	1.67946e-06
850	AMACR	ENSG00000242110	247.99	0.596867	1.72033e-06
851	RACGAP1	ENSG00000161800	370.255	0.97821	1.7397e-06
852	PLAC8	ENSG00000145287	16.1733	1.59515	1.74928e-06
853	PALM	ENSG00000099864	54.7475	2.36638	1.75062e-06
854	OXER1	ENSG00000162881	33.3148	1.8489	1.82537e-06
855	TRIM9	ENSG00000100505	9.11742	2.42523	1.84323e-06
856	MYO15B	ENSG00000266714	71.1344	1.61122	1.85139e-06
857	ABI3BP	ENSG00000154175	195.129	1.99036	1.90846e-06
858	AFF3	ENSG00000144218	219.855	1.70225	1.98013e-06
859	KDSR	ENSG00000119537	588.577	0.949071	2.01309e-06
860	―	ENSG00000287156	13.4226	2.29089	2.01687e-06
861	LINC02609	ENSG00000233593	10.801	2.20955	2.02278e-06
862	ADAM12	ENSG00000148848	53.8638	1.48573	2.08566e-06
863	FAM83D	ENSG00000101447	130.086	1.31113	2.14109e-06
864	WDR17	ENSG00000150627	8.00872	3.29771	2.14263e-06
865	CDKN2C	ENSG00000123080	183.329	0.692296	2.19151e-06
866	CHAF1B	ENSG00000159259	144.08	0.625151	2.21292e-06
867	MGST1	ENSG00000008394	3099.68	0.820756	2.34243e-06
868	ZCCHC2	ENSG00000141664	124.261	1.48413	2.38741e-06
869	GDF7	ENSG00000143869	50.519	2.40261	2.41205e-06
870	CRYM	ENSG00000103316	11.3839	2.0088	2.41921e-06
871	FAM241B	ENSG00000171224	18.8427	1.84166	2.49442e-06
872	PPTC7	ENSG00000196850	215.322	1.35615	2.52285e-06
873	PACC1	ENSG00000065600	90.3984	1.08916	2.52364e-06
874	CXCL6	ENSG00000124875	9.52337	2.71729	2.59841e-06
875	CENPU	ENSG00000151725	163.031	1.09948	2.5987e-06
876	―	ENSG00000290792	67.0261	1.87948	2.5987e-06
877	PAPPA-AS1	ENSG00000256040	138.222	2.43237	2.60211e-06
878	―	ENSG00000291175	47.4238	1.30853	2.63514e-06
879	YWHAH	ENSG00000128245	1502.62	0.462564	2.68286e-06
880	NAGS	ENSG00000161653	48.8875	1.26891	2.68286e-06
881	SLC38A11	ENSG00000169507	155.336	1.30651	2.73218e-06
882	BUB1B	ENSG00000156970	126.817	1.05161	2.7785e-06
883	BRCA2	ENSG00000139618	45.4568	1.80585	2.7986e-06
884	―	ENSG00000279419	4.99258	3.90096	2.81973e-06
885	―	ENSG00000288018	19.8064	1.44087	2.87585e-06
886	FAM169A	ENSG00000198780	11.4675	2.20348	2.91734e-06
887	CAPN3	ENSG00000092529	190.827	0.73981	2.94261e-06
888	ZNF100	ENSG00000197020	18.8543	1.43076	2.94261e-06
889	―	ENSG00000248994	17.0332	1.52684	3.01806e-06
890	KCNV1	ENSG00000164794	6.19516	6.27292	3.16618e-06
891	UNC5C	ENSG00000182168	9.2073	7.41735	3.17754e-06
892	DNA2	ENSG00000138346	34.4634	1.89122	3.22074e-06
893	MTSS1	ENSG00000170873	39.3291	1.89602	3.25148e-06
894	NTRK2	ENSG00000148053	5.66433	3.01976	3.35854e-06
895	CRLF1	ENSG00000006016	37.9246	1.44517	3.37702e-06
896	LRCH2	ENSG00000130224	109.664	1.78766	3.37702e-06
897	GL000009.2	ENSG00000306721	8.85941	2.67723	3.46719e-06
898	TMEM70	ENSG00000175606	173.575	1.05994	3.51164e-06
899	CHRNA5	ENSG00000169684	23.7071	2.28494	3.51289e-06
900	ERAP2	ENSG00000164308	1244.21	0.902971	3.5322e-06
901	PLEKHA7	ENSG00000166689	9.39489	2.13206	3.55825e-06
902	NLRC5	ENSG00000140853	427.476	0.832475	3.56952e-06
903	GCNT3	ENSG00000140297	6.82002	2.40732	3.60845e-06
904	ID2	ENSG00000115738	65.8087	1.00706	3.64726e-06
905	SLC36A4	ENSG00000180773	111.105	1.33635	3.66818e-06
906	SRR	ENSG00000167720	167.816	0.707702	3.73333e-06
907	GPR68	ENSG00000119714	428.856	0.799477	3.74708e-06
908	SIAE	ENSG00000110013	528.117	0.959006	3.74824e-06
909	EDNRA	ENSG00000151617	64.0228	2.16857	3.83348e-06
910	ATP1B1	ENSG00000143153	57.567	1.56577	3.87486e-06
911	PTGFR	ENSG00000122420	55.0373	2.06398	3.94826e-06
912	WIF1	ENSG00000156076	7.66708	6.17588	4.03418e-06
913	MED29	ENSG00000063322	488.39	0.42736	4.0958e-06
914	TRIM5	ENSG00000132256	427.068	1.28202	4.22065e-06
915	GANC	ENSG00000214013	251.665	0.77297	4.2331e-06
916	LYSMD2	ENSG00000140280	49.155	1.17015	4.25587e-06
917	POLD3	ENSG00000077514	173.857	0.763599	4.26004e-06
918	TEX11	ENSG00000120498	4.85077	5.36793	4.36403e-06
919	PTGR2	ENSG00000140043	72.2484	1.19174	4.41367e-06
920	LRRCC1	ENSG00000133739	40.5316	1.86751	4.48799e-06
921	TUB	ENSG00000166402	151.84	1.29845	4.56748e-06
922	PNP	ENSG00000198805	514.885	0.802246	4.57244e-06
923	EBF1	ENSG00000164330	44.2898	1.32308	4.60746e-06
924	CYP26B1	ENSG00000003137	10.0653	2.65343	4.73657e-06
925	NUF2	ENSG00000143228	50.1799	1.57438	4.74172e-06
926	GPR141	ENSG00000187037	25.4205	2.30297	4.78898e-06
927	ID3	ENSG00000117318	443.739	1.09186	4.78979e-06
928	HSPB7	ENSG00000173641	304.289	0.996075	5.07677e-06
929	B2M	ENSG00000166710	35921.8	0.961904	5.20321e-06
930	CHMP5	ENSG00000086065	558.735	1.1705	5.38872e-06
931	CHST15	ENSG00000182022	474.104	1.00835	5.48674e-06
932	BRIP1	ENSG00000136492	70.0444	1.23557	5.51489e-06
933	CHRM2	ENSG00000181072	871.82	1.4217	5.60481e-06
934	RRM2B	ENSG00000048392	640.653	1.66565	5.6592e-06
935	TNFSF10	ENSG00000121858	5.08022	4.53917	5.67611e-06
936	DAPK1	ENSG00000196730	72.2013	1.23742	5.71562e-06
937	USP43	ENSG00000154914	23.7996	1.46991	5.80126e-06
938	PGRMC1	ENSG00000101856	2403.24	0.992095	5.9997e-06
939	SHC4	ENSG00000185634	13.0771	1.76421	6.06692e-06
940	ANKMY2	ENSG00000106524	207.318	0.852036	6.07444e-06
941	TNFRSF10A	ENSG00000104689	71.4721	1.26164	6.09513e-06
942	BTC	ENSG00000174808	4.90089	3.56833	6.15326e-06
943	STIL	ENSG00000123473	112.888	1.50175	6.31788e-06
944	GALNT17	ENSG00000185274	8.72364	3.57394	6.34812e-06
945	ELAPOR1	ENSG00000116299	12.0405	2.19466	6.36391e-06
946	HSPA2	ENSG00000126803	274.152	0.735064	6.36391e-06
947	ZNF521	ENSG00000198795	127.215	1.54555	6.38623e-06
948	XPNPEP2	ENSG00000122121	24.7094	1.48365	6.47816e-06
949	BEND7	ENSG00000165626	10.4337	3.65007	6.65094e-06
950	XKRX	ENSG00000182489	18.805	1.70207	6.66536e-06
951	GLYATL2	ENSG00000156689	15.4121	2.20715	6.75664e-06
952	CENPI	ENSG00000102384	121.575	0.8872	6.89939e-06
953	SNX5	ENSG00000089006	807.845	0.650777	6.91968e-06
954	GALNT13	ENSG00000144278	7.6854	7.15996	7.01621e-06
955	LINC01117	ENSG00000224577	26.7775	1.44834	7.06504e-06
956	SNCAIP	ENSG00000064692	46.0343	1.37927	7.08217e-06
957	MTMR11	ENSG00000014914	339.555	0.531634	7.14932e-06
958	NCKAP5-AS2	ENSG00000226953	39.8017	1.17478	7.34287e-06
959	FGF9	ENSG00000102678	4.16118	3.95253	7.40018e-06
960	PATL2	ENSG00000229474	12.7975	2.27859	7.40018e-06
961	PEF1-AS1	ENSG00000235790	29.8352	1.35061	7.44862e-06
962	CIMAP3	ENSG00000173947	38.8179	0.982923	7.62819e-06
963	MCTP2	ENSG00000140563	136.122	1.39017	7.64317e-06
964	CALCOCO2	ENSG00000136436	1024.46	0.510095	7.81982e-06
965	KCNQ5	ENSG00000185760	15.01	1.8689	8.12231e-06
966	―	ENSG00000277511	9.51259	2.58183	8.21116e-06
967	―	ENSG00000229618	4.73067	5.39465	8.34191e-06
968	GUCY1A2	ENSG00000152402	139.653	1.79505	8.34687e-06
969	KIF14	ENSG00000118193	40.888	2.00487	8.55598e-06
970	CELF2	ENSG00000048740	84.6216	1.60069	8.6025e-06
971	ZNF287	ENSG00000141040	118.784	0.725816	8.6025e-06
972	F8	ENSG00000185010	45.5812	1.18294	8.68152e-06
973	ABCB4	ENSG00000005471	9.43032	2.13392	8.82951e-06
974	MOB3B	ENSG00000120162	25.9406	1.60178	8.87957e-06
975	SLC25A21	ENSG00000183032	8.16428	2.32389	9.13554e-06
976	FADS1	ENSG00000149485	2951.86	0.851376	9.13849e-06
977	―	ENSG00000273230	30.4987	1.1455	9.18394e-06
978	SEL1L3	ENSG00000091490	16.8195	1.82395	9.25335e-06
979	TERF1	ENSG00000147601	155.999	0.845517	9.26551e-06
980	MAP2K6	ENSG00000108984	95.7826	0.973966	9.27589e-06
981	SPTBN4	ENSG00000160460	57.9666	0.895337	9.28511e-06
982	DCLK2	ENSG00000170390	334.468	0.645323	9.5539e-06
983	KI270742.1	ENSG00000306474	11.0176	3.30638	9.5544e-06
984	ENPP5	ENSG00000112796	19.1604	1.76537	9.60162e-06
985	PRKCE	ENSG00000171132	133.097	1.58258	9.88652e-06
986	POGLUT3	ENSG00000178202	1018.79	1.44842	1.0115e-05
987	RPSAP52	ENSG00000293176	58.9685	1.23412	1.02272e-05
988	FRMPD1	ENSG00000070601	7.60411	7.14479	1.03545e-05
989	DLG2	ENSG00000150672	8.07581	2.05851	1.08221e-05
990	TMT1A	ENSG00000185432	108.463	1.21316	1.08955e-05
991	VAMP4	ENSG00000117533	438.303	1.30224	1.09006e-05
992	―	ENSG00000272512	40.8264	1.64194	1.096e-05
993	PCNA	ENSG00000132646	864.752	0.791447	1.13168e-05
994	IL18R1	ENSG00000115604	5.7093	6.04645	1.1548e-05
995	RPA2	ENSG00000117748	431.505	0.521769	1.15603e-05
996	ANXA1	ENSG00000135046	6496.13	0.769951	1.15984e-05
997	SHFL	ENSG00000130813	1105.47	0.97738	1.18562e-05
998	LRRC37B	ENSG00000185158	56.7413	0.970179	1.20837e-05
999	KICS2	ENSG00000174206	59.7857	0.963082	1.21225e-05
1000	MGAT4A	ENSG00000071073	5.23804	5.94358	1.23547e-05
1001	TMEM225B	ENSG00000244219	16.4815	1.72077	1.2516e-05
1002	CDH13-AS2	ENSG00000260228	200.528	0.957578	1.25196e-05
1003	NAP1L3	ENSG00000186310	33.7482	1.66393	1.25737e-05
1004	UBE2L6	ENSG00000156587	1370.27	0.810413	1.26372e-05
1005	SCAMP1-AS1	ENSG00000245556	51.537	1.02096	1.28227e-05
1006	SPRYD7	ENSG00000123178	206.48	0.717928	1.2933e-05
1007	IRX2	ENSG00000170561	33.6304	1.37902	1.30348e-05
1008	KCNJ15	ENSG00000157551	36.2421	1.37291	1.30559e-05
1009	GNAZ	ENSG00000128266	359.625	0.642806	1.32174e-05
1010	―	ENSG00000251095	5.60693	5.26545	1.34223e-05
1011	SELENOI	ENSG00000138018	381.37	0.80334	1.34561e-05
1012	DLEU1	ENSG00000176124	65.7579	0.874968	1.35345e-05
1013	CNRIP1	ENSG00000119865	615.278	0.483288	1.3828e-05
1014	PTPRU	ENSG00000060656	745.879	0.707315	1.38792e-05
1015	SHROOM4	ENSG00000158352	6.3455	4.47879	1.39778e-05
1016	CLSPN	ENSG00000092853	142.219	0.984151	1.42354e-05
1017	BTG4	ENSG00000137707	3.934	3.63587	1.43723e-05
1018	―	ENSG00000261625	100.071	1.03184	1.44134e-05
1019	C1orf115	ENSG00000162817	881.349	0.660237	1.44753e-05
1020	RGS4	ENSG00000117152	44.7377	1.37087	1.45538e-05
1021	LUZP2	ENSG00000187398	8.49919	2.47211	1.48699e-05
1022	EMX2	ENSG00000170370	104.386	0.660597	1.50408e-05
1023	CYB561	ENSG00000008283	1107.74	0.604711	1.51674e-05
1024	INAFM2	ENSG00000259330	285.591	0.58569	1.53761e-05
1025	―	ENSG00000226816	6.16409	3.51734	1.54613e-05
1026	NFIL3	ENSG00000165030	233.378	1.05437	1.55393e-05
1027	BMAL2	ENSG00000029153	274.432	1.07286	1.59808e-05
1028	AOPEP	ENSG00000148120	296.599	0.810611	1.63265e-05
1029	TMEM26	ENSG00000196932	41.4624	1.16416	1.65083e-05
1030	PRSS23	ENSG00000150687	5130.11	0.659246	1.65376e-05
1031	LRP1B	ENSG00000168702	20.603	2.37102	1.65748e-05
1032	DEPDC1	ENSG00000024526	89.0132	1.68178	1.65793e-05
1033	SOHLH2	ENSG00000120669	9.67354	1.90708	1.66827e-05
1034	CNKSR2	ENSG00000149970	4.65267	5.333	1.69911e-05
1035	TNC	ENSG00000041982	814.724	1.31328	1.71034e-05
1036	H4C14	ENSG00000270882	77.3247	1.69103	1.76827e-05
1037	METTL13	ENSG00000010165	670.632	0.304979	1.7772e-05
1038	ASPM	ENSG00000066279	142.574	1.56684	1.80695e-05
1039	LEF1	ENSG00000138795	55.0692	1.50849	1.83494e-05
1040	GRID1	ENSG00000182771	7.05025	2.89704	1.85657e-05
1041	ZNF442	ENSG00000198342	26.1577	1.17829	1.88003e-05
1042	TSPAN12	ENSG00000106025	7.53609	2.37109	1.99339e-05
1043	―	ENSG00000296962	4.38052	5.12293	2.00066e-05
1044	LRFN5-DT	ENSG00000258636	17.422	1.96787	2.00634e-05
1045	LINGO1	ENSG00000169783	9.25297	3.1187	2.02314e-05
1046	LIAS	ENSG00000121897	58.5569	0.838243	2.03935e-05
1047	LINC01619	ENSG00000257242	5.67484	3.11417	2.05664e-05
1048	LSP1P5	ENSG00000291150	338.761	1.37691	2.14822e-05
1049	PMP22	ENSG00000109099	647.675	0.55115	2.18559e-05
1050	AFAP1L2	ENSG00000169129	53.0264	1.36048	2.21233e-05
1051	ELFN1	ENSG00000225968	202.134	0.767183	2.23964e-05
1052	VRK2	ENSG00000028116	121.414	1.10146	2.2671e-05
1053	HNRNPH3	ENSG00000096746	1046.08	0.539853	2.26755e-05
1054	ST8SIA5	ENSG00000101638	5.89758	2.87102	2.27792e-05
1055	CAVIN4	ENSG00000170681	13.7173	1.61255	2.28019e-05
1056	SNX10	ENSG00000086300	4.8654	4.89116	2.29996e-05
1057	CD200	ENSG00000091972	9.05773	2.12394	2.30788e-05
1058	CSMD2	ENSG00000121904	104.177	1.35297	2.30788e-05
1059	KSR1	ENSG00000141068	163.281	1.02121	2.35639e-05
1060	―	ENSG00000279569	92.6905	1.38476	2.36139e-05
1061	SCLT1	ENSG00000151466	90.5786	0.978209	2.41648e-05
1062	PIGH	ENSG00000100564	125.229	0.698707	2.48191e-05
1063	B4GALNT4	ENSG00000182272	11.7981	2.01378	2.49303e-05
1064	LY75	ENSG00000054219	11.489	3.51961	2.54853e-05
1065	LCE4A	ENSG00000187170	4.44313	3.78537	2.59296e-05
1066	MMD	ENSG00000108960	65.6946	1.24602	2.60056e-05
1067	ORC6	ENSG00000091651	92.4304	0.958179	2.60644e-05
1068	RAD54L	ENSG00000085999	126.005	0.701929	2.62179e-05
1069	SLC25A30	ENSG00000174032	256.395	1.11419	2.6877e-05
1070	SNAPC1	ENSG00000023608	110.187	1.33622	2.7489e-05
1071	―	ENSG00000289044	5.05616	4.04244	2.75724e-05
1072	SRCIN1	ENSG00000277363	4.11233	4.53714	2.75979e-05
1073	CFB	ENSG00000243649	28.5879	1.51779	2.77147e-05
1074	―	ENSG00000291133	17.3324	2.73885	2.80357e-05
1075	C4orf46	ENSG00000205208	126.808	0.899877	2.82947e-05
1076	NEK2	ENSG00000117650	44.338	1.26394	2.95628e-05
1077	BIRC3	ENSG00000023445	217.302	1.34395	3.02057e-05
1078	NUDCD1	ENSG00000120526	261.332	1.1668	3.02914e-05
1079	RRM1	ENSG00000167325	829.847	0.753362	3.02955e-05
1080	ABHD15	ENSG00000168792	282.742	0.567841	3.03293e-05
1081	PARD3B	ENSG00000116117	445.442	1.04965	3.04492e-05
1082	GAL3ST4	ENSG00000197093	326.71	1.02179	3.04492e-05
1083	PLBD1-AS1	ENSG00000256751	7.82709	2.43071	3.06109e-05
1084	FTCDNL1	ENSG00000226124	8.84129	1.98019	3.06337e-05
1085	―	ENSG00000247679	36.3517	0.891725	3.08297e-05
1086	HMGB2	ENSG00000164104	385.053	1.07671	3.09048e-05
1087	GEN1	ENSG00000178295	127.03	1.22287	3.09676e-05
1088	LINC00484	ENSG00000235641	7.17171	2.74775	3.10948e-05
1089	ANK2	ENSG00000145362	236.274	1.3402	3.17027e-05
1090	GAREM1	ENSG00000141441	42.8404	1.33198	3.1737e-05
1091	CORO2A	ENSG00000106789	34.9474	1.33384	3.21574e-05
1092	ARL6IP1	ENSG00000170540	926.989	1.12136	3.22247e-05
1093	PRKCZ	ENSG00000067606	39.6369	0.983256	3.38389e-05
1094	KCNJ12	ENSG00000184185	8.88132	2.64892	3.38417e-05
1095	TMEM144	ENSG00000164124	78.2215	1.16937	3.40048e-05
1096	LIN7A	ENSG00000111052	109.067	1.0533	3.40349e-05
1097	―	ENSG00000308602	9.57313	2.36797	3.47986e-05
1098	GATA6	ENSG00000141448	19.4276	1.4247	3.487e-05
1099	RNASE4	ENSG00000258818	139.729	0.964428	3.57363e-05
1100	KIF18A	ENSG00000121621	42.0255	1.81455	3.58568e-05
1101	SEC61A2	ENSG00000065665	164.409	0.61788	3.70829e-05
1102	PRPS1	ENSG00000147224	642.993	0.666655	3.8042e-05
1103	SLC52A1	ENSG00000132517	70.3302	1.29311	3.81309e-05
1104	GPBP1	ENSG00000062194	563.842	0.822906	3.84614e-05
1105	C21orf91	ENSG00000154642	60.2154	1.49467	3.94758e-05
1106	NR3C2	ENSG00000151623	7.40219	2.80379	3.97299e-05
1107	ARL4D	ENSG00000175906	274.673	0.860898	4.07871e-05
1108	STC1	ENSG00000159167	546.434	0.741544	4.18437e-05
1109	CA8	ENSG00000178538	3.666	4.41639	4.30498e-05
1110	ASB9	ENSG00000102048	26.9988	1.20171	4.31881e-05
1111	STRBP	ENSG00000165209	39.1222	1.19548	4.32952e-05
1112	SLC27A6	ENSG00000113396	29.281	1.62228	4.36635e-05
1113	―	ENSG00000279267	32.2036	1.36391	4.37281e-05
1114	―	ENSG00000296766	4.67275	3.56608	4.38618e-05
1115	PAWR	ENSG00000177425	276.775	1.24213	4.42308e-05
1116	ZCCHC4	ENSG00000168228	75.6348	0.980311	4.43272e-05
1117	AVIL	ENSG00000135407	44.1983	1.05676	4.56494e-05
1118	FSIP1	ENSG00000150667	11.3967	1.52415	4.66543e-05
1119	PSAT1	ENSG00000135069	703.694	0.994463	4.81693e-05
1120	LURAP1L	ENSG00000153714	317.32	0.807692	4.85796e-05
1121	GZF1	ENSG00000125812	122.288	0.891944	4.98e-05
1122	APOL3	ENSG00000128284	137.71	1.08065	4.98e-05
1123	NUSAP1	ENSG00000137804	239.487	1.2394	5.00534e-05
1124	―	ENSG00000261324	20.9148	1.90006	5.06767e-05
1125	―	ENSG00000289698	41.3035	0.964267	5.08979e-05
1126	TSHZ2	ENSG00000182463	5.67603	6.59895	5.22707e-05
1127	SLC66A3	ENSG00000162976	337.532	1.00174	5.27622e-05
1128	UNC93B1	ENSG00000110057	596.28	0.900285	5.29971e-05
1129	PPP1R1C	ENSG00000150722	6.93257	2.06798	5.30138e-05
1130	TRPS1	ENSG00000104447	168.231	1.13972	5.30262e-05
1131	―	ENSG00000251630	4.02465	5.03061	5.30722e-05
1132	CLGN	ENSG00000153132	8.62098	2.32421	5.405e-05
1133	STRADB	ENSG00000082146	345.29	0.631735	5.40619e-05
1134	LINC02995	ENSG00000253955	4.92884	2.57288	5.42413e-05
1135	BMPER	ENSG00000164619	113.425	1.65579	5.54445e-05
1136	H2BC26	ENSG00000196890	5.80545	2.56843	5.54578e-05
1137	CENPK	ENSG00000123219	48.564	1.44433	5.62407e-05
1138	MYCBPAP	ENSG00000136449	9.12579	1.8597	5.64662e-05
1139	FAM181B	ENSG00000182103	3.55815	4.92923	5.66512e-05
1140	IFRD1	ENSG00000006652	206.513	0.974482	5.68162e-05
1141	NRG1	ENSG00000157168	237.61	0.892907	5.9102e-05
1142	DACH1	ENSG00000276644	53.2257	1.67969	5.97909e-05
1143	TRIM6	ENSG00000121236	66.1902	1.23383	6.02187e-05
1144	PUS7	ENSG00000091127	110.645	1.01441	6.0541e-05
1145	TRMT2B	ENSG00000188917	206.176	0.650993	6.06673e-05
1146	HES6	ENSG00000144485	22.0051	1.31932	6.10554e-05
1147	CEBPA	ENSG00000245848	7.55293	2.0009	6.1157e-05
1148	IL15RA	ENSG00000134470	21.6717	1.30988	6.14858e-05
1149	NGEF	ENSG00000066248	7.0173	2.28874	6.15012e-05
1150	DDI2	ENSG00000197312	193.911	0.847698	6.19825e-05
1151	CES2	ENSG00000172831	942.427	0.443528	6.23086e-05
1152	SEC11C	ENSG00000166562	295.309	0.875144	6.35e-05
1153	―	ENSG00000295599	3.78288	4.97085	6.46894e-05
1154	IDI1	ENSG00000067064	1594.88	0.780093	6.51887e-05
1155	APOB	ENSG00000084674	4.29385	2.79903	6.6026e-05
1156	CLXN	ENSG00000034239	45.3496	0.935651	6.60994e-05
1157	MROH7	ENSG00000184313	5.8006	2.76783	6.67178e-05
1158	SPDL1	ENSG00000040275	155.604	0.969331	6.76484e-05
1159	EME1	ENSG00000154920	44.1044	0.865016	6.81397e-05
1160	CCDC18	ENSG00000122483	46.7291	1.22013	6.82029e-05
1161	LACTB2	ENSG00000147592	69.3129	1.15211	6.83941e-05
1162	ATP1A3	ENSG00000105409	18.6918	1.30263	6.87183e-05
1163	―	ENSG00000270100	10.9076	2.22091	6.90078e-05
1164	ADO	ENSG00000181915	257.597	0.967579	6.94792e-05
1165	HAS3	ENSG00000103044	17.8626	1.49671	6.98664e-05
1166	MDM2	ENSG00000135679	1797.84	1.24742	7.2225e-05
1167	―	ENSG00000280219	10.2421	1.88726	7.22555e-05
1168	MATN1-AS1	ENSG00000186056	21.9445	1.23341	7.2418e-05
1169	―	ENSG00000291207	159.003	0.558597	7.24652e-05
1170	―	ENSG00000230882	5.23911	2.56098	7.42883e-05
1171	H2BP1	ENSG00000291123	25.9979	1.39951	7.43208e-05
1172	ME2	ENSG00000082212	268.6	0.918563	7.55811e-05
1173	POLR3F	ENSG00000132664	125.753	0.752237	7.5602e-05
1174	TMX4	ENSG00000125827	723.646	0.849564	7.59861e-05
1175	PCDHB2	ENSG00000112852	26.682	1.25377	7.64843e-05
1176	BET1-AS1	ENSG00000236861	5.21009	2.98539	7.66572e-05
1177	FAM66B	ENSG00000215374	24.7872	1.52561	7.66642e-05
1178	TRMT6	ENSG00000089195	229.888	0.643756	7.76387e-05
1179	NIPAL3	ENSG00000001461	1872.71	0.660522	7.77316e-05
1180	PRODH	ENSG00000100033	3.5442	3.65742	7.81864e-05
1181	AK4	ENSG00000162433	157.393	0.991898	7.99305e-05
1182	FAM81A	ENSG00000157470	5.47148	2.97895	7.99906e-05
1183	PWWP2A	ENSG00000170234	135.648	0.991945	8.11147e-05
1184	ACVR2A	ENSG00000121989	95.2947	1.19586	8.13324e-05
1185	―	ENSG00000310519	6.07783	2.49045	8.15527e-05
1186	DGAT2	ENSG00000062282	8.03861	2.00658	8.20873e-05
1187	PLXNB3	ENSG00000198753	414.529	0.485322	8.22476e-05
1188	ABCC2	ENSG00000023839	9.18102	1.82812	8.38087e-05
1189	ZNF107	ENSG00000196247	47.829	1.6482	8.39812e-05
1190	SGIP1	ENSG00000118473	1140.21	0.861255	8.49911e-05
1191	CASC2	ENSG00000177640	22.3715	1.09788	8.54107e-05
1192	POC5	ENSG00000152359	70.9427	0.8639	8.55387e-05
1193	MYEF2	ENSG00000104177	99.7899	1.13438	8.70746e-05
1194	PGM2L1	ENSG00000165434	118.733	1.02332	8.73427e-05
1195	PPM1K	ENSG00000163644	363.737	1.36438	8.79679e-05
1196	MMP28	ENSG00000271447	6.77877	3.33577	8.87414e-05
1197	GSR	ENSG00000104687	371.595	0.875676	8.91676e-05
1198	TBC1D2	ENSG00000095383	825.425	0.774732	8.92383e-05
1199	ATL1	ENSG00000198513	226.629	0.830342	8.99965e-05
1200	TMEM254-AS1	ENSG00000230091	36.8648	1.14634	9.1865e-05
1201	ZNF383	ENSG00000188283	62.3215	1.00163	9.22426e-05
1202	CD163	ENSG00000177575	10.6742	1.91506	9.54415e-05
1203	SS18	ENSG00000141380	932.831	0.789811	9.67898e-05
1204	NME5	ENSG00000112981	27.019	1.24255	9.91982e-05
1205	RNF152	ENSG00000176641	546.398	0.902075	9.99951e-05
1206	FRAS1	ENSG00000138759	152.838	1.66768	0.000102306
1207	BAMBI	ENSG00000095739	11.2612	1.68706	0.000102352
1208	PPM1L	ENSG00000163590	9.21846	2.34728	0.000102564
1209	WWOX	ENSG00000186153	65.2499	0.725693	0.000103569
1210	TLR2	ENSG00000137462	24.6585	1.25028	0.000104465
1211	CHD9NB	ENSG00000277639	25.8728	1.09572	0.000105127
1212	DNMT1	ENSG00000130816	875.349	0.639923	0.000108251
1213	PIK3AP1	ENSG00000155629	3.85408	5.51209	0.000108352
1214	AREG	ENSG00000109321	19.1732	1.43506	0.000110236
1215	NUCB2	ENSG00000070081	1210.17	0.653321	0.000112017
1216	TMEM268	ENSG00000157693	119.417	0.537182	0.000112122
1217	―	ENSG00000289201	4.5904	2.95187	0.0001127
1218	TXK	ENSG00000074966	8.35923	2.02363	0.000113064
1219	ATP2B1-AS1	ENSG00000271614	25.5189	1.21441	0.000113686
1220	HSDL2	ENSG00000119471	490.472	0.499101	0.000115561
1221	SDC2	ENSG00000169439	762.983	0.959041	0.000115894
1222	RMC1	ENSG00000141452	244.404	0.506393	0.000116878
1223	SMC2	ENSG00000136824	198.397	1.00148	0.000118091
1224	PPM1D	ENSG00000170836	125.469	0.928302	0.00011822
1225	C5orf34	ENSG00000172244	36.5118	1.3123	0.00011822
1226	LINC02202	ENSG00000245812	6.72635	2.21073	0.000119967
1227	GLIS3	ENSG00000107249	334.641	1.33884	0.000120675
1228	PYHIN1	ENSG00000163564	3.67575	5.49628	0.000121058
1229	DNAH6	ENSG00000115423	8.25365	2.34293	0.000121723
1230	NCAPH	ENSG00000121152	96.217	0.864711	0.000121914
1231	PI4K2B	ENSG00000038210	207.563	1.17899	0.000122854
1232	HSPA6	ENSG00000173110	4.16796	3.20949	0.000123227
1233	―	ENSG00000299199	48.0216	0.987719	0.00012415
1234	BMP6	ENSG00000153162	5.8932	2.59192	0.000126404
1235	BTG1-DT	ENSG00000245904	7.12223	2.50989	0.000126608
1236	PTEN	ENSG00000171862	881.814	0.899452	0.000126734
1237	CEP95	ENSG00000258890	119.484	0.5468	0.000126734
1238	CLCC1	ENSG00000121940	601.477	0.532648	0.000127416
1239	RCSD1	ENSG00000198771	3.92541	3.08345	0.000127429
1240	MTMR10	ENSG00000166912	211.05	0.86567	0.000128106
1241	GBP3	ENSG00000117226	533.115	1.3243	0.00012815
1242	―	ENSG00000267251	6.34212	2.34442	0.000128747
1243	WASHC2A	ENSG00000099290	1045.82	0.399016	0.000128775
1244	UBE2C	ENSG00000175063	349.053	0.73926	0.000129284
1245	TSPAN13	ENSG00000106537	275.155	1.33982	0.000129759
1246	PPARGC1B	ENSG00000155846	22.5628	1.5391	0.000133184
1247	B3GALNT2	ENSG00000162885	277.38	0.808852	0.000133184
1248	CMBL	ENSG00000164237	266.719	1.05719	0.000134861
1249	DPY19L2P2	ENSG00000291139	20.8775	1.59352	0.000137782
1250	ZNF407-AS1	ENSG00000264247	73.3792	0.702408	0.00014415
1251	SLC1A4	ENSG00000115902	629.669	0.378358	0.000144883
1252	AMZ2	ENSG00000196704	834.017	0.367286	0.000146295
1253	PDE4C	ENSG00000105650	23.6965	2.60324	0.00014743
1254	CXCL1	ENSG00000163739	287.533	0.67645	0.000148159
1255	ATRNL1	ENSG00000107518	34.9607	1.27955	0.000148893
1256	CCP110	ENSG00000103540	97.6817	1.42898	0.000149173
1257	CDC25C	ENSG00000158402	52.5636	1.06313	0.000151637
1258	BBS7	ENSG00000138686	230.833	0.774126	0.000153619
1259	DNMBP	ENSG00000107554	906.955	0.64314	0.000155984
1260	TARID	ENSG00000227954	9.91356	1.83445	0.000156207
1261	ISL1-DT	ENSG00000259663	10.0372	1.62164	0.000156828
1262	DGCR5	ENSG00000273032	4.70372	3.67961	0.00015689
1263	GRPEL1	ENSG00000109519	471.856	0.537015	0.000157069
1264	GCK	ENSG00000106633	12.5216	1.51628	0.000157447
1265	SMAD6	ENSG00000137834	21.1978	1.23012	0.000161955
1266	ZNF704	ENSG00000164684	3.65309	4.21957	0.000163728
1267	CPT1C	ENSG00000169169	285.512	1.12914	0.000165806
1268	SEMA3C	ENSG00000075223	944.574	2.29384	0.000166316
1269	DYSF	ENSG00000135636	6.1133	2.41091	0.000167495
1270	CASZ1	ENSG00000130940	5.69481	2.46585	0.000168882
1271	ZDHHC11	ENSG00000188818	20.0659	1.54886	0.000171326
1272	―	ENSG00000271894	3.52149	3.51876	0.000171345
1273	TMPO-AS1	ENSG00000257167	31.4009	1.04011	0.000171915
1274	ZNF823	ENSG00000197933	27.7458	1.28375	0.000172743
1275	MR1	ENSG00000153029	586.501	0.735307	0.000173103
1276	FAS	ENSG00000026103	642.325	1.13619	0.00017421
1277	VANGL1	ENSG00000173218	394.277	0.930499	0.000175747
1278	TMEM38B	ENSG00000095209	69.3492	1.55547	0.000177697
1279	IRAK3	ENSG00000090376	104.112	1.16973	0.00017779
1280	MYO3B	ENSG00000071909	6.08265	2.5093	0.000177835
1281	GOLM1	ENSG00000135052	789.787	0.561311	0.000178139
1282	KANSL2	ENSG00000139620	300.414	0.45771	0.000178139
1283	ERVK9-11	ENSG00000269486	9.64775	1.72765	0.000178139
1284	FAM228A	ENSG00000186453	5.34775	2.74761	0.000179321
1285	UVSSA	ENSG00000163945	319.739	0.562278	0.000180341
1286	HAUS2	ENSG00000137814	191.9	0.862969	0.000181776
1287	C17orf75	ENSG00000108666	126.936	0.651306	0.000184142
1288	CCNA2	ENSG00000145386	167.852	1.17782	0.000185454
1289	PPP1R12B	ENSG00000077157	136.332	0.747553	0.000186098
1290	THNSL2	ENSG00000144115	54.1609	1.47524	0.000186597
1291	ABCC4	ENSG00000125257	650.966	1.40226	0.000189729
1292	ATP8A1	ENSG00000124406	5.45577	2.84263	0.000192869
1293	PITPNM3	ENSG00000091622	20.9279	1.09895	0.000193234
1294	―	ENSG00000309206	5.41727	2.69323	0.000193234
1295	MANEAL	ENSG00000185090	65.8337	0.738857	0.000194348
1296	CYP1B1	ENSG00000138061	836.296	1.84534	0.00019516
1297	SYT12	ENSG00000173227	14.5139	1.41338	0.000198082
1298	FZD3	ENSG00000104290	14.6301	1.93747	0.000207649
1299	ATAD5	ENSG00000176208	24.5205	1.62302	0.000208597
1300	SULT4A1	ENSG00000130540	5.4979	2.49284	0.000209504
1301	CEBPG	ENSG00000153879	234.802	0.566934	0.000209504
1302	TOR1B	ENSG00000136816	805.866	0.656651	0.000210009
1303	IL12RB1	ENSG00000096996	30.9335	1.30676	0.000212099
1304	PRIMPOL	ENSG00000164306	74.5779	1.10004	0.000212636
1305	SEC23B	ENSG00000101310	864.801	0.6098	0.000212908
1306	CEP55	ENSG00000138180	186.157	1.03874	0.000213374
1307	―	ENSG00000297451	33.8537	1.22734	0.000217949
1308	TCF7	ENSG00000081059	40.9762	1.23425	0.000219289
1309	MAP7D2	ENSG00000184368	8.0724	2.14473	0.000219289
1310	ASAH2	ENSG00000188611	15.137	1.88682	0.000220744
1311	―	ENSG00000250644	252.174	1.37105	0.00022119
1312	LARP1B	ENSG00000138709	130.723	0.77594	0.000230293
1313	TFR2	ENSG00000106327	8.70808	2.16005	0.000231773
1314	JCAD	ENSG00000165757	1079.73	0.82775	0.000232021
1315	―	ENSG00000286125	4.7817	2.50522	0.000232925
1316	POLG2	ENSG00000256525	125.323	0.604058	0.000233195
1317	PHF19	ENSG00000119403	486.053	0.598018	0.000234005
1318	―	ENSG00000304354	8.44083	2.2352	0.00023497
1319	PADI3	ENSG00000142619	3.85806	4.66777	0.000235494
1320	CATSPERE	ENSG00000179397	11.7236	1.46382	0.000237606
1321	TRABD2B	ENSG00000269113	3.38716	4.24279	0.00024165
1322	ZNF334	ENSG00000198185	11.438	1.89274	0.000243111
1323	MOCOS	ENSG00000075643	137.167	0.624067	0.000243202
1324	RAPGEF1	ENSG00000107263	886.41	0.583772	0.000243202
1325	C5AR2	ENSG00000134830	16.0562	1.83034	0.000243799
1326	HSPA4L	ENSG00000164070	128.891	1.22819	0.000245111
1327	SUPT7L	ENSG00000119760	741.508	0.305144	0.000248623
1328	APOBEC3F	ENSG00000128394	111.144	1.01588	0.000249835
1329	TMEM51	ENSG00000171729	141.974	0.622571	0.0002513
1330	CYB5B	ENSG00000103018	1954.18	0.490095	0.000254314
1331	CLCA2	ENSG00000137975	70.311	1.33718	0.000259999
1332	ORC5	ENSG00000164815	254.596	0.735302	0.000261395
1333	DRAXIN	ENSG00000162490	4.79509	2.88117	0.000263056
1334	ENPP4	ENSG00000001561	16.1538	2.13633	0.000263962
1335	DDR2	ENSG00000162733	1902.42	0.889575	0.000265664
1336	GOLGA1	ENSG00000136935	325.736	0.432563	0.000268934
1337	TMBIM1	ENSG00000135926	5461.5	0.481915	0.000269011
1338	PNO1	ENSG00000115946	187.119	0.690556	0.000269826
1339	MTERF3	ENSG00000156469	163.021	0.810425	0.000272343
1340	ECRG4	ENSG00000119147	3.23015	5.344	0.000273955
1341	KIF11	ENSG00000138160	201.079	1.24019	0.000274185
1342	OLMALINC	ENSG00000235823	69.583	0.870822	0.000274654
1343	ZFP82	ENSG00000181007	78.002	0.729027	0.000276929
1344	TLE4	ENSG00000106829	924.906	0.830075	0.000280946
1345	SELENOP	ENSG00000250722	85.0192	1.17395	0.000280978
1346	―	ENSG00000305108	8.74804	1.79566	0.00028099
1347	HOMER2	ENSG00000103942	10.326	1.42452	0.000283098
1348	STAMBP	ENSG00000124356	405.318	0.406321	0.000284403
1349	TSEN15	ENSG00000198860	301.31	0.773175	0.000286573
1350	FAM107B	ENSG00000065809	247.228	1.13535	0.000287111
1351	ZFYVE26	ENSG00000072121	481.12	0.666303	0.00029045
1352	BHMT	ENSG00000145692	6.54634	2.05801	0.000292368
1353	FOXO1	ENSG00000150907	34.6395	1.15923	0.000296699
1354	COL26A1	ENSG00000160963	46.682	1.19989	0.000298093
1355	ZNF44	ENSG00000197857	130.093	0.633387	0.000305056
1356	FASTKD2	ENSG00000118246	439.934	0.66804	0.000305582
1357	ZNF483	ENSG00000173258	35.0386	1.45762	0.00030638
1358	OSGIN2	ENSG00000164823	96.6876	0.978502	0.000314762
1359	TBCE	ENSG00000284770	345.776	0.513723	0.000318252
1360	CADPS2	ENSG00000081803	99.201	1.08246	0.000318452
1361	GREB1	ENSG00000196208	3.94679	2.99745	0.000319398
1362	ITM2A	ENSG00000078596	15.18	1.56388	0.00031951
1363	―	ENSG00000296170	3.66717	3.66232	0.00031951
1364	GLE1	ENSG00000119392	408.644	0.348939	0.000319742
1365	LINC01224	ENSG00000269416	4.91155	2.66963	0.000330689
1366	DNAH5	ENSG00000039139	60.4641	1.16636	0.000334613
1367	STOX1	ENSG00000165730	4.18193	3.04937	0.000335164
1368	SKA2	ENSG00000182628	402.492	0.786359	0.000335749
1369	CCDC158	ENSG00000163749	6.39038	2.49924	0.000338489
1370	PCBP3	ENSG00000183570	14.7548	1.61964	0.000349878
1371	MANBA	ENSG00000109323	560.878	0.409594	0.000352251
1372	ZC3H8	ENSG00000144161	89.9246	0.839238	0.000354272
1373	EXOSC9	ENSG00000123737	275.242	0.671983	0.000357095
1374	―	ENSG00000289261	11.6822	1.72855	0.000361089
1375	AOC2	ENSG00000131480	12.758	1.48123	0.000362949
1376	IDNK	ENSG00000148057	37.5573	0.990957	0.000365395
1377	MCMDC2	ENSG00000178460	7.15512	1.92594	0.000366493
1378	―	ENSG00000261762	5.23649	3.65481	0.000369705
1379	CYYR1-AS1	ENSG00000197934	12.2242	1.3939	0.000370049
1380	LINC02939	ENSG00000235159	8.16986	1.97644	0.000370738
1381	TM7SF3	ENSG00000064115	1492.13	0.573483	0.00037127
1382	KLHL29	ENSG00000119771	296.752	0.817703	0.00037127
1383	―	ENSG00000255366	2.88736	4.17635	0.000371679
1384	TTF2	ENSG00000116830	190.937	0.915781	0.000374017
1385	FIRRM	ENSG00000000460	86.634	0.767176	0.00037482
1386	KIF5C	ENSG00000168280	6.12881	2.65214	0.000374906
1387	CEP112	ENSG00000154240	111.279	0.579488	0.000376452
1388	TLDC2	ENSG00000101342	13.0261	1.65849	0.000377126
1389	SFN	ENSG00000175793	26.5178	2.95348	0.000377901
1390	JUN-DT	ENSG00000234807	20.3915	1.18161	0.000384438
1391	AK3	ENSG00000147853	739.254	0.832166	0.000385105
1392	TRIB2	ENSG00000071575	142.641	0.782788	0.000386567
1393	KRT7	ENSG00000135480	75.5229	1.18031	0.000386692
1394	ALDH2	ENSG00000111275	253.981	0.644056	0.000389906
1395	MIS12	ENSG00000167842	131.142	0.898991	0.000390967
1396	TMPO	ENSG00000120802	357.642	1.25607	0.000390996
1397	RNF213-AS1	ENSG00000263069	37.6158	1.09034	0.000394557
1398	PRKAR2B	ENSG00000005249	53.3329	1.89803	0.000395803
1399	SPG11	ENSG00000104133	419.66	0.717754	0.000395803
1400	LINC01894	ENSG00000264345	4.21344	3.75308	0.000396693
1401	CKAP2	ENSG00000136108	262.751	1.33346	0.000404264
1402	―	ENSG00000279696	13.2798	1.54905	0.000406093
1403	SMC6	ENSG00000163029	274.152	1.05385	0.000406794
1404	MAD2L1	ENSG00000164109	124.927	1.20599	0.000408214
1405	BAIAP2L1	ENSG00000006453	205.58	0.558964	0.000408747
1406	JAG1	ENSG00000101384	433.338	1.18163	0.000408747
1407	DLGAP5	ENSG00000126787	152.721	0.911588	0.000413566
1408	OVGP1	ENSG00000085465	29.2094	1.20385	0.000415858
1409	CNTLN	ENSG00000044459	108.842	0.82662	0.000420511
1410	ZMAT1	ENSG00000166432	8.15332	1.87319	0.000422372
1411	HMGB3	ENSG00000029993	314.139	0.573132	0.000427728
1412	ZNF566	ENSG00000186017	36.1685	1.20969	0.000432719
1413	TIPIN	ENSG00000075131	55.1982	1.09132	0.000433943
1414	CHROMR	ENSG00000223960	122.796	1.05136	0.000437131
1415	―	ENSG00000260007	16.6355	1.31869	0.000437131
1416	EBAG9	ENSG00000147654	96.6719	0.848433	0.000438772
1417	―	ENSG00000289405	9.86547	2.10017	0.000439303
1418	INKA2	ENSG00000197852	357.72	0.555918	0.00044372
1419	TNFRSF10C	ENSG00000173535	169.585	0.906287	0.000443752
1420	CACYBP	ENSG00000116161	448.707	0.651283	0.00044976
1421	RAB3B	ENSG00000169213	1337.44	0.923367	0.000451671
1422	ESCO2	ENSG00000171320	36.7196	1.28886	0.000459151
1423	GNG2	ENSG00000186469	144.147	0.951842	0.000460209
1424	SLC22A31	ENSG00000259803	3.82478	3.01696	0.00046026
1425	KI270711.1	ENSG00000271254	468.581	0.643413	0.000462889
1426	GRPEL2	ENSG00000164284	102.783	0.897489	0.00046705
1427	PLPP1	ENSG00000067113	610.881	0.513443	0.000468529
1428	MAT2A	ENSG00000168906	3273.31	0.556218	0.000468529
1429	PLEKHN1	ENSG00000187583	118.599	0.96994	0.000472472
1430	ZNF441	ENSG00000197044	46.0487	1.5206	0.000472769
1431	PROCA1	ENSG00000167525	58.4359	1.35499	0.000473407
1432	GAB3	ENSG00000160219	19.5975	1.36724	0.000477363
1433	WDR47	ENSG00000085433	284.284	1.33722	0.000479282
1434	TMEM116	ENSG00000198270	72.3746	0.676803	0.000482529
1435	ADIRF-AS1	ENSG00000272734	90.9172	0.669543	0.000486625
1436	SYCP2	ENSG00000196074	23.0586	1.79991	0.000486939
1437	H2AC25	ENSG00000181218	65.1818	0.819947	0.000490637
1438	IDH1	ENSG00000138413	1068.68	0.836763	0.000491846
1439	LRRC8D	ENSG00000171492	266.33	1.07577	0.000493812
1440	FOLR3	ENSG00000110203	8.28481	2.03558	0.000494589
1441	FUS	ENSG00000089280	3641.06	0.337338	0.000496551
1442	PDIK1L	ENSG00000175087	21.2823	1.41085	0.000498332
1443	PIK3R1	ENSG00000145675	381.04	1.26707	0.000499205
1444	PROCR	ENSG00000101000	422.823	0.596669	0.00050099
1445	LINC00623	ENSG00000226067	30.5347	0.982077	0.000503685
1446	PER3	ENSG00000049246	70.7875	1.3961	0.000505312
1447	JAM2	ENSG00000154721	97.1722	0.824504	0.000505406
1448	CHEK1	ENSG00000149554	242.574	0.694899	0.000506255
1449	RBPJ	ENSG00000168214	953.094	1.14274	0.000506283
1450	TYW1	ENSG00000198874	204.104	0.435598	0.000508456
1451	PAQR5	ENSG00000137819	44.6194	1.1505	0.00051207
1452	DLL1	ENSG00000198719	17.3739	1.24258	0.000515937
1453	TFAP2C	ENSG00000087510	838.627	0.500692	0.000517469
1454	BCHE	ENSG00000114200	3.77193	6.12638	0.000520152
1455	LRRC75A	ENSG00000181350	20.2004	1.72259	0.000522468
1456	RBM18	ENSG00000119446	299.048	0.76771	0.000525185
1457	NDC80	ENSG00000080986	103.178	1.1299	0.000526738
1458	SANBR	ENSG00000162929	82.857	1.15094	0.000527503
1459	COL16A1	ENSG00000084636	3624.31	0.740837	0.000532508
1460	IL1RL2	ENSG00000115598	12.7859	1.3047	0.000533941
1461	INPP5B	ENSG00000204084	183.459	0.531874	0.000536809
1462	TFPI	ENSG00000003436	1605.69	0.91547	0.000537495
1463	EGF	ENSG00000138798	9.86113	2.15575	0.000539455
1464	BIRC2	ENSG00000110330	876.097	1.15582	0.000549201
1465	―	ENSG00000291144	3.08907	4.63769	0.000549765
1466	DPY19L1	ENSG00000173852	400.856	1.14652	0.000552175
1467	BBS12	ENSG00000181004	60.4586	0.716211	0.000563201
1468	S1PR5	ENSG00000180739	8.78787	1.68909	0.000564184
1469	―	ENSG00000260784	8.08961	2.10009	0.000568559
1470	ZNF423	ENSG00000102935	5.28412	2.545	0.000581101
1471	ATL3	ENSG00000184743	1327.03	0.708454	0.000581213
1472	HCP5	ENSG00000206337	50.0079	0.994611	0.000582911
1473	PLXNC1	ENSG00000136040	6.66279	2.22583	0.00058388
1474	KANK1	ENSG00000107104	606.408	0.963603	0.000585781
1475	CCDC59	ENSG00000133773	122.796	0.611107	0.000588105
1476	CEP290	ENSG00000198707	181.63	1.11038	0.000595056
1477	STEAP1	ENSG00000164647	61.6443	1.10129	0.000596917
1478	―	ENSG00000282304	8.37213	6.97827	0.000597171
1479	B4GALNT2	ENSG00000167080	30.5335	0.995582	0.000602294
1480	DNAJB9	ENSG00000128590	374.708	1.31846	0.000603467
1481	VSIG10	ENSG00000176834	200.968	0.519663	0.000603467
1482	DDX31	ENSG00000125485	235.057	0.391861	0.000606244
1483	PARD6G-AS1	ENSG00000267270	32.8755	0.95375	0.000607919
1484	ZNF273	ENSG00000198039	10.1935	1.60343	0.000610481
1485	RAD51AP1	ENSG00000111247	48.32	1.51677	0.000613092
1486	ZNF506	ENSG00000081665	102.407	0.748473	0.000616681
1487	TEX30	ENSG00000151287	93.523	0.902979	0.00061763
1488	TCL6	ENSG00000187621	7.14165	1.78787	0.000621172
1489	SLF1	ENSG00000133302	54.7377	1.40411	0.000622583
1490	FAM200C	ENSG00000221886	37.5263	1.25243	0.000626604
1491	ZNF431	ENSG00000196705	50.2834	1.13534	0.000627195
1492	IVNS1ABP	ENSG00000116679	466.123	0.690646	0.000628971
1493	GPR65	ENSG00000140030	8.20738	1.54128	0.000652708
1494	PALB2	ENSG00000083093	138.258	0.814536	0.000655192
1495	B4GALT6	ENSG00000118276	56.483	1.52873	0.000656271
1496	TRIM22	ENSG00000132274	1596.57	1.15941	0.000660124
1497	MTBP	ENSG00000172167	31.6687	1.36222	0.000666998
1498	CATSPERG	ENSG00000099338	7.89818	1.869	0.000667308
1499	PRKCH	ENSG00000027075	14.2151	1.35692	0.000667385
1500	APLP1	ENSG00000105290	242.571	0.727738	0.000675796
1501	EVA1C	ENSG00000166979	100.29	1.1838	0.00068772
1502	RNF227	ENSG00000179859	128.649	0.693463	0.000691142
1503	ABLIM3	ENSG00000173210	1760.06	0.49916	0.00069686
1504	VXN	ENSG00000169085	20.329	1.35061	0.000696941
1505	SAMD8	ENSG00000156671	369.56	0.944378	0.000700003
1506	PCF11	ENSG00000165494	412.112	0.875344	0.000703422
1507	GLYATL1	ENSG00000166840	4.34464	2.85891	0.000705265
1508	SLC25A28	ENSG00000155287	778.195	0.751408	0.000708446
1509	EXO1	ENSG00000174371	83.6891	0.733055	0.000709962
1510	TMEM123	ENSG00000152558	1179.04	1.43774	0.000715226
1511	―	ENSG00000294230	7.96304	2.75395	0.000718661
1512	LINS1	ENSG00000140471	88.0011	0.697067	0.000748599
1513	EPHA7	ENSG00000135333	4.41536	2.11534	0.000759496
1514	―	ENSG00000276740	37.0818	1.47989	0.000760663
1515	USP14	ENSG00000101557	885.644	0.88439	0.00076981
1516	―	ENSG00000288832	2.79781	4.05257	0.000777726
1517	MSC	ENSG00000178860	231.356	0.729293	0.000780377
1518	CH25H	ENSG00000138135	7.04421	1.84937	0.000791642
1519	―	ENSG00000235070	4.05172	3.92302	0.000795402
1520	ALG2	ENSG00000119523	559.927	0.734451	0.000800482
1521	―	ENSG00000272335	38.0816	1.05379	0.000804761
1522	TENM2	ENSG00000145934	131.611	1.77369	0.000808682
1523	KNL1	ENSG00000137812	87.8775	1.39947	0.00081562
1524	ARHGAP22	ENSG00000128805	451.896	0.892652	0.000818791
1525	―	ENSG00000272927	6.03701	2.62862	0.000839309
1526	GLI3	ENSG00000106571	217.816	0.67194	0.00084209
1527	ZNF33A	ENSG00000189180	127.084	0.778973	0.000854353
1528	OXCT2P1	ENSG00000237624	31.7859	1.31888	0.000854692
1529	NUP155	ENSG00000113569	240.581	0.811206	0.000859249
1530	ZNF43	ENSG00000198521	52.2146	0.8844	0.000861098
1531	VLDLR	ENSG00000147852	52.5393	0.847737	0.000861414
1532	CFAP68	ENSG00000137720	128.785	0.728414	0.000870036
1533	CCDC136	ENSG00000128596	37.4846	1.07516	0.000871052
1534	FCRLB	ENSG00000162746	33.7419	0.935345	0.00087246
1535	CROT	ENSG00000005469	184.151	0.811982	0.000873716
1536	MAFG	ENSG00000197063	790.878	0.466099	0.000875438
1537	TMEM68	ENSG00000167904	146.732	0.946791	0.000875884
1538	STXBP6	ENSG00000168952	112.854	0.668612	0.000877691
1539	BBS1	ENSG00000174483	337.749	0.488736	0.00088085
1540	SLBP	ENSG00000163950	485.591	0.627643	0.000881597
1541	DSCC1	ENSG00000136982	43.9017	0.746729	0.000882325
1542	ARSK	ENSG00000164291	117.601	1.05218	0.000882602
1543	CSDC2	ENSG00000172346	122.353	0.94554	0.000883774
1544	ATP8B3	ENSG00000130270	76.4544	0.746858	0.000887728
1545	SCN3A	ENSG00000153253	3.54859	4.63704	0.000895142
1546	TNFRSF11B	ENSG00000164761	2169.5	1.63707	0.000896103
1547	ZNF91	ENSG00000167232	76.0861	0.789921	0.000915326
1548	TRIM52	ENSG00000183718	158.024	0.864928	0.00093447
1549	PCOLCE2	ENSG00000163710	3.8495	4.84165	0.000935017
1550	SIPA1L3	ENSG00000105738	533.931	0.942982	0.000940577
1551	―	ENSG00000291077	57.2407	1.82163	0.000951559
1552	BORA	ENSG00000136122	57.2648	1.052	0.000952806
1553	XKR8	ENSG00000158156	168.19	0.571174	0.000953984
1554	CD274	ENSG00000120217	134.064	0.887445	0.000972674
1555	ZNF512	ENSG00000243943	437.85	0.516702	0.000987128
1556	―	ENSG00000251537	10.7883	2.24702	0.000998369
1557	SETDB2	ENSG00000136169	340.339	0.635079	0.00101321
1558	CDCA5	ENSG00000146670	509.241	0.608702	0.00101562
1559	CACNG4	ENSG00000075461	3.17786	5.8361	0.00102602
1560	―	ENSG00000244055	20.4152	1.18391	0.00102737
1561	HASPIN	ENSG00000177602	27.2851	1.10486	0.00103074
1562	EED	ENSG00000074266	153.527	0.901776	0.00103137
1563	CAV1	ENSG00000105974	25134.8	0.726884	0.00103137
1564	CEP72	ENSG00000112877	19.007	1.20903	0.00103137
1565	NOC3L	ENSG00000173145	234.821	0.759046	0.00103137
1566	FGD4	ENSG00000139132	84.6745	1.32743	0.00103262
1567	RPS6KA6	ENSG00000072133	53.4174	1.12775	0.00103346
1568	DTX1	ENSG00000135144	3.61693	2.66949	0.00103435
1569	PKIA	ENSG00000171033	48.1331	1.06554	0.00104328
1570	RERG	ENSG00000134533	3.14787	5.87344	0.00104675
1571	F3	ENSG00000117525	1514.16	1.02455	0.00105629
1572	NSD2	ENSG00000109685	916.713	0.609772	0.0010643
1573	NAPG	ENSG00000134265	310.885	0.664161	0.00106765
1574	SGCE	ENSG00000127990	928.596	0.788494	0.00107731
1575	TENM1	ENSG00000009694	4.26821	3.1203	0.00108001
1576	WDR87	ENSG00000171804	3.01254	4.0027	0.00108401
1577	ADSS1	ENSG00000185100	55.2309	0.73141	0.00108538
1578	IFT56	ENSG00000105948	90.5746	0.771494	0.00108846
1579	TMEM33	ENSG00000109133	425.226	0.999781	0.00109295
1580	AADAT	ENSG00000109576	64.3678	0.992978	0.00109934
1581	KLF11	ENSG00000172059	140.196	1.14459	0.0011051
1582	TROAP	ENSG00000135451	217.787	0.765171	0.00111059
1583	KLHDC1	ENSG00000197776	21.0611	1.63112	0.00111059
1584	PPFIBP1	ENSG00000110841	420.043	1.03104	0.00111238
1585	PID1	ENSG00000153823	979.102	0.414267	0.0011187
1586	MAP4K3-DT	ENSG00000231312	88.7312	0.529123	0.00113584
1587	SOAT1	ENSG00000057252	405.41	0.800323	0.00113833
1588	GCH1	ENSG00000131979	6.30922	1.89324	0.00114095
1589	―	ENSG00000272321	29.8304	1.24518	0.00114688
1590	NMI	ENSG00000123609	130.48	1.00404	0.00116858
1591	NUP35	ENSG00000163002	71.4119	0.816783	0.00117544
1592	AKAP1	ENSG00000121057	187.026	0.588794	0.0011786
1593	CPT1A	ENSG00000110090	560.418	0.774033	0.00118202
1594	SETD9	ENSG00000155542	39.0682	0.846193	0.00118503
1595	ZBTB49	ENSG00000168826	52.9248	0.71898	0.00119548
1596	TRIM35	ENSG00000104228	345.856	0.622586	0.00120625
1597	LRRN2	ENSG00000170382	2.85281	3.63576	0.00120625
1598	CNNM1	ENSG00000119946	142.666	0.738564	0.00121279
1599	FBXO16	ENSG00000214050	25.8375	1.43402	0.00124852
1600	TMEM236	ENSG00000148483	5.10034	2.25872	0.00124922
1601	COX18	ENSG00000163626	116.235	0.774567	0.0012688
1602	CKAP5	ENSG00000175216	1318.24	0.554552	0.0012717
1603	GRAMD2A	ENSG00000175318	7.37426	1.91315	0.00129009
1604	DNAJA4	ENSG00000140403	186.621	0.551905	0.00129034
1605	NUP42	ENSG00000136243	205.586	0.524589	0.0012922
1606	OCA2	ENSG00000104044	2.61271	4.97076	0.00129962
1607	NPTX1	ENSG00000171246	2254.23	0.899303	0.00130162
1608	GALNTL6	ENSG00000174473	3.00801	2.88078	0.00132093
1609	DCN	ENSG00000011465	8899.47	0.528816	0.00132301
1610	MSL3B	ENSG00000293137	74.2747	0.677848	0.00132356
1611	―	ENSG00000293738	9.33128	1.51654	0.00132812
1612	―	ENSG00000278192	2.89929	2.95013	0.00133014
1613	NOPCHAP1	ENSG00000151131	134.72	0.529531	0.00133377
1614	VWCE	ENSG00000167992	492.767	1.14278	0.00133498
1615	AHR	ENSG00000106546	256.669	1.45867	0.00134134
1616	PPP4R3A	ENSG00000100796	465.579	0.50609	0.00134167
1617	CHST1	ENSG00000175264	38.4039	1.01079	0.00134748
1618	LYPD1	ENSG00000150551	13.3411	1.32522	0.00135077
1619	INTS7	ENSG00000143493	170.517	0.635938	0.00135832
1620	CYP3A7	ENSG00000160870	12.1434	1.44577	0.00136251
1621	PLCB1	ENSG00000182621	74.4106	1.54112	0.00136444
1622	GNG4	ENSG00000168243	37.7034	1.02503	0.00136814
1623	AKTIP	ENSG00000166971	134.571	0.637716	0.00137591
1624	SNHG14	ENSG00000224078	616.832	1.12999	0.001382
1625	NAP1L5	ENSG00000177432	122.864	0.752074	0.0014058
1626	RBBP8	ENSG00000101773	168.752	0.915819	0.00141162
1627	ZNF75A	ENSG00000162086	176.837	0.761172	0.00142574
1628	C10orf55	ENSG00000222047	27.585	1.02332	0.00143001
1629	―	ENSG00000290043	39.4564	0.726432	0.0014339
1630	SMIM41	ENSG00000284791	3.30109	3.165	0.00143608
1631	NOLC1	ENSG00000166197	627.95	0.613642	0.0014424
1632	―	ENSG00000291124	64.637	0.904384	0.00144828
1633	―	ENSG00000299549	2.7637	3.25421	0.00145583
1634	RMDN1	ENSG00000176623	427.67	0.462794	0.00146093
1635	WDSUB1	ENSG00000196151	63.4764	0.862047	0.00147037
1636	―	ENSG00000286190	701.549	0.642448	0.00148206
1637	TENM3-AS1	ENSG00000177822	2.73964	3.29675	0.00148659
1638	―	ENSG00000285816	122.67	1.3018	0.00149016
1639	SHANK3	ENSG00000251322	137.281	0.800544	0.00149537
1640	MRPL49	ENSG00000149792	680.334	0.370776	0.00149601
1641	RNF114	ENSG00000124226	1247.4	0.411617	0.00149894
1642	CCDC102B	ENSG00000150636	274.742	0.808695	0.00150774
1643	TIGD7	ENSG00000140993	96.487	0.974547	0.0015084
1644	GLA	ENSG00000102393	479.617	0.397638	0.00151099
1645	NUDT13	ENSG00000166321	23.0707	0.896463	0.00151481
1646	MALT1	ENSG00000172175	257.402	0.9751	0.00151481
1647	―	ENSG00000232811	7.58091	1.75147	0.00151481
1648	DONSON	ENSG00000159147	215.062	0.687152	0.00151622
1649	CYYR1	ENSG00000166265	4.81167	2.48478	0.00155874
1650	GGH	ENSG00000137563	428.446	0.73602	0.00155926
1651	HEATR3	ENSG00000155393	246.207	0.807477	0.00156427
1652	ACTR3B	ENSG00000133627	123.116	0.451471	0.00156463
1653	MOSMO	ENSG00000185716	164.762	0.821034	0.00158751
1654	PCDHA12	ENSG00000251664	3.5814	6.06007	0.00159629
1655	―	ENSG00000279443	7.11111	2.0312	0.00159629
1656	ADAM11	ENSG00000073670	14.9114	1.77161	0.00159665
1657	NCKAP5	ENSG00000176771	271.873	1.24552	0.0016061
1658	ROR2	ENSG00000169071	136.522	0.546604	0.00160728
1659	DNAJA3	ENSG00000103423	555.32	0.306362	0.0016117
1660	TADA1	ENSG00000152382	64.4226	0.834817	0.0016117
1661	RFK	ENSG00000135002	166.136	1.1383	0.00161442
1662	PIK3C2B	ENSG00000133056	49.2782	0.892446	0.00162478
1663	ORC1	ENSG00000085840	56.0881	0.695881	0.00163715
1664	FAM167A	ENSG00000154319	480.492	0.678726	0.00165542
1665	PDE2A-AS2	ENSG00000256633	15.3887	2.06779	0.00165629
1666	GIMAP2	ENSG00000106560	23.985	1.30954	0.00166248
1667	GTPBP10	ENSG00000105793	99.06	0.777936	0.00166373
1668	―	ENSG00000258634	277.695	0.463812	0.00166746
1669	DANT2	ENSG00000235244	5.77304	3.24279	0.00166827
1670	AGAP5	ENSG00000172650	47.3459	0.919312	0.00169626
1671	CENPA	ENSG00000115163	83.3958	0.772474	0.0016974
1672	SGCB	ENSG00000163069	1084.83	0.563492	0.00170037
1673	RAB11FIP2	ENSG00000107560	157.201	1.10676	0.00170231
1674	CHRNA7	ENSG00000175344	8.76137	1.72995	0.00170338
1675	HACD3	ENSG00000074696	1042.83	0.712332	0.00170412
1676	IL7	ENSG00000104432	5.03535	2.41588	0.00170529
1677	PRPH2	ENSG00000112619	45.8321	0.878843	0.00174134
1678	SFT2D2	ENSG00000213064	778.587	0.752588	0.00175114
1679	NOL11	ENSG00000130935	342.938	0.697252	0.00176228
1680	APLN	ENSG00000171388	3.69242	2.93894	0.00177511
1681	TMEM132B	ENSG00000139364	21.027	1.1851	0.00177644
1682	PKP2	ENSG00000057294	2.39398	4.30211	0.00178409
1683	ENO2	ENSG00000111674	499.421	0.681386	0.00179004
1684	HSPD1	ENSG00000144381	2107.05	0.494539	0.00179925
1685	CCDC152	ENSG00000198865	10.9786	1.36779	0.00179925
1686	PLA2G4A	ENSG00000116711	20.1254	1.67763	0.00180457
1687	KIF24	ENSG00000186638	49.8845	0.862882	0.00180457
1688	ANKRD42	ENSG00000137494	171.101	0.641983	0.00181214
1689	RAB39B	ENSG00000155961	2.53363	4.87866	0.0018346
1690	PHKB	ENSG00000102893	630.072	0.916542	0.00184091
1691	HS6ST1	ENSG00000136720	807.148	0.404305	0.00184301
1692	RAD51B	ENSG00000182185	46.2119	0.82459	0.00184678
1693	AIDA	ENSG00000186063	1345.05	0.666309	0.00184916
1694	SLC23A2	ENSG00000089057	353.562	0.91376	0.0018495
1695	MCTP1	ENSG00000175471	53.7286	0.941107	0.00187209
1696	TMEM128	ENSG00000132406	173.332	0.909115	0.00189281
1697	STAT4	ENSG00000138378	37.1608	0.75564	0.0019055
1698	CALM2	ENSG00000143933	5466.02	0.9868	0.00190822
1699	ELL3	ENSG00000128886	31.3916	1.29539	0.00191489
1700	IRAK4	ENSG00000198001	296.471	0.51086	0.00191967
1701	CFAP251	ENSG00000158023	240.161	0.440142	0.0019286
1702	RIT1	ENSG00000143622	306.927	0.692776	0.00193163
1703	SCML2	ENSG00000102098	16.5319	1.34215	0.00194039
1704	CPNE8	ENSG00000139117	97.5131	1.26736	0.00194127
1705	―	ENSG00000245025	27.1476	1.5456	0.00195741
1706	THAP6	ENSG00000174796	92.2819	0.648797	0.00196667
1707	HSPA9	ENSG00000113013	2139.88	0.562083	0.00197226
1708	RNF149	ENSG00000163162	367.936	0.54265	0.00197946
1709	―	ENSG00000249741	5.70679	2.20789	0.00198315
1710	RCOR3	ENSG00000117625	222.716	0.778642	0.00198365
1711	―	ENSG00000267568	5.2773	2.35341	0.00199074
1712	―	ENSG00000272554	8.26458	1.61422	0.0019947
1713	MTARC2	ENSG00000117791	116.4	0.526951	0.00200018
1714	PANK2	ENSG00000125779	578.3	0.533206	0.00200677
1715	―	ENSG00000271192	3.58875	3.20217	0.00201489
1716	PTCD2	ENSG00000049883	160.916	0.53273	0.00201687
1717	FAM43B	ENSG00000183114	3.34092	3.3568	0.00205022
1718	KIAA0586	ENSG00000100578	226.745	0.799639	0.00205589
1719	―	ENSG00000289196	2.79116	4.83825	0.00206751
1720	TCP11L1	ENSG00000176148	221.763	0.612308	0.00206802
1721	EIF1AX	ENSG00000173674	651.456	1.02202	0.00208478
1722	TSC22D1	ENSG00000102804	902.921	0.68482	0.00208751
1723	LY6K	ENSG00000160886	276.412	1.09762	0.00210951
1724	NDST3	ENSG00000164100	6.15586	1.74402	0.00212135
1725	UBR7	ENSG00000012963	397.872	0.734221	0.00212283
1726	RESF1	ENSG00000174718	112.849	1.00301	0.00212355
1727	CKAP2L	ENSG00000169607	79.8483	1.19206	0.00212659
1728	DDIAS	ENSG00000165490	33.6203	0.976317	0.00213544
1729	―	ENSG00000258077	4.54754	2.42433	0.00213544
1730	PTPRF	ENSG00000142949	919.409	0.568807	0.00217007
1731	ZNF676	ENSG00000196109	2.23718	4.79744	0.00217428
1732	HEXB	ENSG00000049860	2748.49	0.532392	0.00219229
1733	MITA1	ENSG00000285744	4.63963	2.73777	0.00220427
1734	RPAP3	ENSG00000005175	194.047	0.763889	0.00221228
1735	MAFB	ENSG00000204103	11.6553	1.34066	0.00223041
1736	―	ENSG00000304602	4.43758	2.18368	0.00223111
1737	―	ENSG00000243696	39.1181	0.864205	0.00229356
1738	PARP10	ENSG00000178685	960.908	1.23727	0.0022981
1739	C9orf40	ENSG00000135045	140.369	0.657943	0.00230807
1740	SLFN5	ENSG00000166750	752.235	0.962065	0.00232936
1741	ANAPC4	ENSG00000053900	237.152	0.756499	0.00233093
1742	LINC02795	ENSG00000285210	11.0311	1.34275	0.00233827
1743	ZC3H12C	ENSG00000149289	130.079	1.26007	0.00233846
1744	ARHGAP6	ENSG00000047648	117.231	1.17559	0.00234585
1745	ACE	ENSG00000159640	893.044	0.458083	0.00235725
1746	KCTD4	ENSG00000180332	128.961	0.688166	0.00236024
1747	ATP2B1	ENSG00000070961	1426.14	1.16159	0.00236139
1748	NAA20	ENSG00000173418	648.963	0.534928	0.00236139
1749	VRK1	ENSG00000100749	100.68	0.651608	0.0023645
1750	NALCN	ENSG00000102452	6.97389	2.00729	0.00236573
1751	CGRRF1	ENSG00000100532	96.2801	0.719964	0.00236622
1752	SYPL1	ENSG00000008282	847.866	1.124	0.00237114
1753	―	ENSG00000253768	4.39741	2.22766	0.00237561
1754	CIMAP1B	ENSG00000177989	37.3589	1.38217	0.00237578
1755	AUH	ENSG00000148090	42.8038	1.07259	0.00238593
1756	PTK2B	ENSG00000120899	66.3629	0.624226	0.00239691
1757	TRMT1L	ENSG00000121486	153.565	1.05899	0.00240367
1758	CCDC30	ENSG00000186409	25.1852	0.794924	0.00241136
1759	PUM3	ENSG00000080608	320.136	0.440606	0.00243383
1760	NLGN4Y	ENSG00000165246	131.328	1.09724	0.00244908
1761	RFC3	ENSG00000133119	78.7737	0.752135	0.00245033
1762	SLC25A37	ENSG00000147454	644.976	0.475278	0.00245387
1763	SNHG1	ENSG00000255717	597.597	0.600648	0.00245766
1764	FARP2	ENSG00000006607	328.873	0.623826	0.00246369
1765	TENT4B	ENSG00000121274	167.834	1.31665	0.00246407
1766	CSE1L	ENSG00000124207	930.397	0.635472	0.00246407
1767	C11orf52	ENSG00000149300	13.6429	1.30168	0.00246531
1768	TTR	ENSG00000118271	3.03836	2.57203	0.00247668
1769	AOC3	ENSG00000131471	3.73315	2.63524	0.00247668
1770	LRR1	ENSG00000165501	123.825	1.0681	0.00248241
1771	SOCS3	ENSG00000184557	229.883	0.648429	0.00248633
1772	PKD1P6-NPIPP1	ENSG00000290394	532.236	0.619759	0.00248661
1773	BLK	ENSG00000136573	5.71279	3.04327	0.00248817
1774	RFWD3	ENSG00000168411	321.552	0.728981	0.00248817
1775	ZNF714	ENSG00000160352	29.0332	1.32957	0.00250964
1776	―	ENSG00000256433	8.05007	1.50092	0.00252731
1777	SMIM10	ENSG00000184785	131.532	0.543633	0.00253222
1778	MCM4	ENSG00000104738	574.333	0.631757	0.00253664
1779	NUFIP2	ENSG00000108256	750.039	0.845248	0.00258283
1780	RSPO1	ENSG00000169218	5.16665	2.16898	0.00263025
1781	PM20D1-AS1	ENSG00000286619	2.591	3.61031	0.00263105
1782	ITPKA	ENSG00000137825	60.3246	1.02887	0.00263748
1783	TMEM19	ENSG00000139291	214.201	0.977714	0.00263832
1784	LINC00857	ENSG00000237523	40.0104	0.820711	0.00263832
1785	TMEM35A	ENSG00000126950	322.179	0.727203	0.00263891
1786	ALDH1A3	ENSG00000184254	95.6172	1.26059	0.00264925
1787	GARIN1A	ENSG00000205085	73.1538	0.76053	0.00265357
1788	NR0B1	ENSG00000169297	2.12424	4.19351	0.00265892
1789	ZEB2-AS1	ENSG00000238057	5.39046	2.11677	0.00266378
1790	GNAI1	ENSG00000127955	420.854	1.01582	0.00266672
1791	LINC01252	ENSG00000247157	19.6634	0.987091	0.00267269
1792	HES2	ENSG00000069812	4.64155	2.85464	0.00268014
1793	JAKMIP3	ENSG00000188385	15.7271	0.99003	0.00268831
1794	SNX2	ENSG00000205302	401.745	0.545661	0.00269096
1795	LRIF1	ENSG00000121931	173.911	1.25385	0.0026999
1796	MAP9	ENSG00000164114	187.017	1.07209	0.0026999
1797	AGBL2	ENSG00000165923	25.2515	0.932107	0.00270582
1798	C18orf54	ENSG00000166845	52.6453	1.10691	0.00270582
1799	NUP107	ENSG00000111581	285.828	0.603795	0.00270878
1800	GPN3	ENSG00000111231	111.681	0.744987	0.00272779
1801	IL7R	ENSG00000168685	100.999	1.01986	0.00273473
1802	SPATA18	ENSG00000163071	466.092	0.918929	0.00275078
1803	STARD8	ENSG00000130052	62.1405	0.72334	0.0027528
1804	FAM76A	ENSG00000009780	96.1474	0.718041	0.00275704
1805	MCM8	ENSG00000125885	138.775	0.792898	0.00275955
1806	CDCA8	ENSG00000134690	241.297	0.672419	0.00276262
1807	ENEMAL	ENSG00000289883	7.91271	2.58739	0.00278549
1808	ZNF92	ENSG00000146757	29.4118	1.60706	0.00288672
1809	TCHH	ENSG00000159450	2.40971	3.83436	0.002891
1810	RIBC2	ENSG00000128408	14.4493	1.14296	0.00289187
1811	―	ENSG00000267387	9.17042	1.60078	0.00292261
1812	AZIN2	ENSG00000142920	140.899	0.549972	0.00293465
1813	RADX	ENSG00000147231	10.8364	1.6605	0.00294217
1814	SHTN1	ENSG00000187164	102.427	0.767827	0.00296611
1815	ZNF518A	ENSG00000177853	127.668	1.31003	0.00298154
1816	CYTL1	ENSG00000170891	71.5113	0.756788	0.0030177
1817	ZNF560	ENSG00000198028	47.1162	0.776585	0.0030177
1818	ABHD18	ENSG00000164074	51.6884	0.722661	0.00303765
1819	―	ENSG00000290450	112.421	0.699406	0.0030394
1820	SLC5A6	ENSG00000138074	486.973	0.459335	0.00304744
1821	GRIN2C	ENSG00000161509	11.1563	1.97475	0.00305885
1822	RLIG1	ENSG00000133641	115.297	0.832419	0.00305935
1823	SLC39A6	ENSG00000141424	1173.91	1.22983	0.00308031
1824	―	ENSG00000226992	7.02701	1.76384	0.00309714
1825	ABHD3	ENSG00000158201	69.4262	1.16567	0.00310478
1826	QNG1	ENSG00000165118	113.989	0.7769	0.00311076
1827	PARPBP	ENSG00000185480	33.3376	1.24547	0.0031271
1828	FOXF1	ENSG00000103241	1191.83	0.699267	0.00313831
1829	RBM47	ENSG00000163694	5.05243	2.49871	0.00315209
1830	BAZ1A	ENSG00000198604	331.891	0.972026	0.00316629
1831	―	ENSG00000303946	25.0568	0.846788	0.00317581
1832	TEC	ENSG00000135605	25.3915	0.996835	0.00319524
1833	CRMP1	ENSG00000072832	415.374	0.597977	0.00320444
1834	KCNIP2	ENSG00000120049	38.9569	0.773735	0.00322469
1835	ADAMTS3	ENSG00000156140	16.9515	1.22788	0.00323214
1836	CEP295	ENSG00000166004	98.4864	0.805819	0.00324041
1837	SNTB1	ENSG00000172164	246.864	0.749126	0.00324041
1838	THUMPD2	ENSG00000138050	96.5293	0.689323	0.00325092
1839	SHROOM3	ENSG00000138771	828.862	0.732576	0.00325161
1840	MCTS2	ENSG00000101898	100.127	0.583724	0.00325553
1841	CHAC1	ENSG00000128965	889.19	0.739683	0.0032557
1842	RPP25	ENSG00000178718	191.927	0.927247	0.0032557
1843	ALKAL1	ENSG00000196711	2.00673	3.58264	0.0032562
1844	CENPJ	ENSG00000151849	102.092	0.706876	0.00328563
1845	UBE2QL1	ENSG00000215218	2.10844	4.05593	0.00328563
1846	NEMP1	ENSG00000166881	319.349	0.976667	0.00329612
1847	NEK3	ENSG00000136098	150.634	0.467737	0.00329848
1848	―	ENSG00000254607	2.91285	2.74378	0.00330688
1849	INHBA-AS1	ENSG00000224116	2.50416	3.66221	0.00330811
1850	PRRG1	ENSG00000130962	184.159	1.30567	0.0033643
1851	RAPGEF5	ENSG00000136237	11.6602	2.36448	0.0033657
1852	TCTN2	ENSG00000168778	263.585	0.396086	0.0033661
1853	―	ENSG00000243008	11.9677	1.58205	0.00336624
1854	POC1B-GALNT4	ENSG00000259075	7.11398	3.87657	0.00337449
1855	BIVM	ENSG00000134897	511.909	0.779381	0.00338221
1856	TMBIM4	ENSG00000155957	697.458	0.868302	0.00340118
1857	RIC8B	ENSG00000111785	183.584	0.548979	0.00342243
1858	MAOB	ENSG00000069535	4.52892	1.95585	0.0034733
1859	CHMP4C	ENSG00000164695	2.28825	3.93442	0.00348174
1860	PAICS	ENSG00000128050	1273.1	0.719736	0.00348943
1861	ZNF354B	ENSG00000178338	51.7222	0.934201	0.00353598
1862	SLC35D1	ENSG00000116704	386.104	0.96119	0.00354512
1863	NOL8	ENSG00000198000	256.664	0.523754	0.00356407
1864	PDE4B	ENSG00000184588	98.1274	1.07786	0.00357
1865	FBXO22	ENSG00000167196	448.48	0.505774	0.00359316
1866	―	ENSG00000253496	2.01686	3.46631	0.00360522
1867	CLEC1A	ENSG00000150048	6.1179	2.02215	0.00361669
1868	CCDC82	ENSG00000149231	184.785	1.15339	0.00365869
1869	LINC02937	ENSG00000230537	6.96494	2.17473	0.00367227
1870	LINC03124	ENSG00000287151	158.208	0.450768	0.00367227
1871	SYTL2	ENSG00000137501	84.4956	1.37035	0.00368705
1872	KLHL34	ENSG00000185915	2.90815	2.50645	0.00368705
1873	WDR41	ENSG00000164253	575.907	0.590135	0.00369795
1874	MXRA5	ENSG00000101825	1778.01	0.874733	0.00369903
1875	PSPH	ENSG00000146733	135.285	0.433568	0.00371084
1876	CPT1B	ENSG00000205560	31.4907	1.85365	0.00371755
1877	ITGA1	ENSG00000213949	1025.72	0.683681	0.00372092
1878	ZNF486	ENSG00000256229	45.8188	1.03479	0.00373174
1879	ABCA6	ENSG00000154262	34.1385	0.901644	0.00374507
1880	YWHAQ	ENSG00000134308	3906.81	0.695092	0.00374533
1881	CNTRL	ENSG00000119397	85.2069	0.769841	0.00374639
1882	BEST3	ENSG00000127325	2.68836	4.04211	0.00376362
1883	S100PBP	ENSG00000116497	295.061	0.652264	0.00378719
1884	HERC2P9	ENSG00000291082	170.74	0.533242	0.00380703
1885	ODR4	ENSG00000157181	171.322	1.04837	0.00386446
1886	LINC02966	ENSG00000234997	7.66838	1.96094	0.0038804
1887	FAM161A	ENSG00000170264	18.4185	1.41628	0.00389131
1888	CACNA1C	ENSG00000151067	359.127	0.547916	0.00391061
1889	TMOD2	ENSG00000128872	95.0518	1.17023	0.00391914
1890	KIF6	ENSG00000164627	12.0988	1.23216	0.0039304
1891	OXR1	ENSG00000164830	258.036	0.749956	0.0039309
1892	ANKRD35	ENSG00000198483	109.082	1.04658	0.00393257
1893	PRIM1	ENSG00000198056	21.4543	1.67369	0.00393483
1894	LY6E-DT	ENSG00000247317	62.5591	0.708963	0.00394913
1895	ZNF267	ENSG00000185947	37.3087	0.877851	0.0039545
1896	KCNMB1	ENSG00000145936	1.99077	4.49593	0.00397442
1897	SIMC1	ENSG00000170085	123.775	0.538951	0.00399679
1898	SPX	ENSG00000134548	2.68504	3.62739	0.00400269
1899	SCPEP1	ENSG00000121064	878.167	0.647214	0.00407396
1900	FLVCR1	ENSG00000162769	63.9757	0.935308	0.00411379
1901	PLEKHB2	ENSG00000115762	1561.31	0.7516	0.00411592
1902	TMEM50A	ENSG00000183726	1497.36	0.437413	0.00411592
1903	YY2	ENSG00000230797	26.7929	1.05703	0.00411886
1904	ZKSCAN5	ENSG00000196652	262.346	0.354833	0.00412085
1905	RAB14	ENSG00000119396	974.906	0.728777	0.0041551
1906	POLA1	ENSG00000101868	119.12	0.691243	0.00416158
1907	RDH14	ENSG00000240857	172.024	0.540614	0.00416763
1908	ANKFY1	ENSG00000185722	1042.77	0.946606	0.00417854
1909	13	ENSG00000302204	2.03296	4.05163	0.00423138
1910	―	ENSG00000256124	6.46064	1.74724	0.00423189
1911	―	ENSG00000306831	14.2828	1.40635	0.00424975
1912	COBLL1	ENSG00000082438	140.542	1.15684	0.00427073
1913	GLUL	ENSG00000135821	3062.91	0.857822	0.00429329
1914	DHFR	ENSG00000228716	306.454	0.671684	0.00429431
1915	BCL7A	ENSG00000110987	140.383	0.536029	0.00430673
1916	INO80	ENSG00000128908	413.147	0.440712	0.00430673
1917	PARP15	ENSG00000173200	4.59406	2.11015	0.00430695
1918	ZNF225-AS1	ENSG00000186019	31.4777	1.92453	0.00431639
1919	MICU2	ENSG00000165487	246.99	0.886249	0.00431647
1920	LINC01614	ENSG00000230838	3.18852	2.35775	0.0043343
1921	PHYHIP	ENSG00000168490	5.9199	1.92144	0.00433986
1922	COG3	ENSG00000136152	357.603	0.835037	0.00434506
1923	TBC1D15	ENSG00000121749	249.563	0.516277	0.00434529
1924	CC2D2A	ENSG00000048342	265.705	0.465052	0.00437837
1925	FANCA	ENSG00000187741	327.207	0.416836	0.00438028
1926	NOVA1	ENSG00000139910	171.69	0.586535	0.00442692
1927	―	ENSG00000289064	2.05843	4.01812	0.00444241
1928	ASIC3	ENSG00000213199	24.8008	1.11554	0.00445515
1929	―	ENSG00000286360	5.93883	1.61468	0.00446548
1930	LRRC15	ENSG00000172061	5.56273	2.32097	0.00446561
1931	NEDD4	ENSG00000069869	451.321	1.14619	0.00446648
1932	SSBP2	ENSG00000145687	266.494	0.603686	0.0044702
1933	MAP3K8	ENSG00000107968	15.1426	0.998966	0.00448811
1934	PCID2	ENSG00000126226	740.244	0.351714	0.00452325
1935	H2BC21	ENSG00000184678	636.02	0.462503	0.00456251
1936	ACAT1	ENSG00000075239	612.045	0.423012	0.00458196
1937	CEBPZ	ENSG00000115816	311.372	0.694237	0.00459149
1938	TMEM245	ENSG00000106771	609.438	0.766353	0.00460342
1939	C2orf49-DT	ENSG00000272994	17.3017	0.957275	0.00461143
1940	WASHC2C	ENSG00000172661	531.204	0.476019	0.00461533
1941	KIT	ENSG00000157404	128.389	1.16062	0.0046159
1942	GUSBP5	ENSG00000251600	20.4546	1.02494	0.00462153
1943	DBF4B	ENSG00000161692	181.948	0.662373	0.00463035
1944	OSBPL1A	ENSG00000141447	330.552	0.66256	0.00463288
1945	APH1B	ENSG00000138613	380.515	0.511009	0.00464136
1946	―	ENSG00000286116	9.31154	1.58805	0.00468522
1947	CKS1B	ENSG00000173207	411.689	0.755304	0.00468579
1948	LINC00654	ENSG00000205181	63.0821	0.843437	0.00468579
1949	SLC35E4	ENSG00000100036	155.97	0.471949	0.00468916
1950	SMO	ENSG00000128602	199.045	0.594311	0.00470018
1951	THAP10	ENSG00000129028	24.4682	1.37842	0.00470188
1952	TWSG1-DT	ENSG00000264964	31.161	0.85909	0.00470953
1953	LRP8	ENSG00000157193	384.821	0.866008	0.00471461
1954	ANKRD34A	ENSG00000272031	84.161	0.62011	0.00471923
1955	―	ENSG00000291041	8.41254	1.41858	0.00471923
1956	CAMK2D	ENSG00000145349	790.288	0.858324	0.0047316
1957	SLITRK6	ENSG00000184564	11.8556	1.7189	0.00473516
1958	RAD54B	ENSG00000197275	55.4348	1.07839	0.00475441
1959	CEP44	ENSG00000164118	50.9463	0.959396	0.00476062
1960	MIPOL1	ENSG00000151338	41.1983	1.10897	0.00478158
1961	―	ENSG00000151303	8.61529	1.54663	0.00478724
1962	H3-3B	ENSG00000132475	2923.1	0.450531	0.00479043
1963	MRPL32	ENSG00000106591	369.072	0.472139	0.00479331
1964	TFAM	ENSG00000108064	116.228	1.11744	0.00479597
1965	―	ENSG00000283839	5.52963	1.71608	0.00480916
1966	CACNB4	ENSG00000182389	3.80387	1.88462	0.00483827
1967	―	ENSG00000258461	39.816	1.07035	0.00483827
1968	SORBS1	ENSG00000095637	4.67331	3.14257	0.0048565
1969	OCLN	ENSG00000197822	24.4488	1.04807	0.00486142
1970	RSKR	ENSG00000167524	89.8722	0.632288	0.00486468
1971	NCAPG2	ENSG00000146918	227.837	0.92385	0.00486823
1972	LINC02610	ENSG00000186235	2.74374	2.49689	0.00486977
1973	IGF1	ENSG00000017427	5.54773	1.86464	0.00489041
1974	TMEM170A	ENSG00000166822	92.0187	0.745513	0.00489282
1975	DNM1L	ENSG00000087470	469.978	0.83662	0.00489897
1976	GRASLND	ENSG00000228203	4.05447	3.06535	0.00489897
1977	LINC01515	ENSG00000228065	14.5267	1.12024	0.00491964
1978	HAUS1	ENSG00000152240	174.353	0.532626	0.00495161
1979	DNAI3	ENSG00000162643	113.456	0.721406	0.00496193
1980	C2orf66	ENSG00000187944	14.137	1.00091	0.00497015
1981	TTF1	ENSG00000125482	71.3588	0.511934	0.00497135
1982	NFIB	ENSG00000147862	3.78286	3.35011	0.00497217
1983	EID3	ENSG00000255150	33.9458	1.00685	0.00497325
1984	BARD1	ENSG00000138376	56.7889	1.28459	0.00498408
1985	ZMPSTE24	ENSG00000084073	661.102	0.984038	0.00498852
1986	SLC5A12	ENSG00000148942	1.95414	4.38687	0.00499621
1987	ZNF678	ENSG00000181450	25.6257	1.30575	0.00501127
1988	MFAP3L	ENSG00000198948	8.69455	1.42658	0.00501349
1989	PCDHAC2	ENSG00000243232	5.21617	2.13834	0.0050135
1990	―	ENSG00000290729	1.81332	3.91742	0.00503933
1991	TCAF2	ENSG00000170379	22.9195	0.886162	0.00504965
1992	ZNF569	ENSG00000196437	44.3857	1.17475	0.00508589
1993	METTL4	ENSG00000101574	81.3418	0.864246	0.00509396
1994	KHK	ENSG00000138030	21.3997	1.26495	0.00509396
1995	NQO1	ENSG00000181019	9003.37	0.507263	0.00509396
1996	ZBBX	ENSG00000169064	2.29796	3.53052	0.00512193
1997	ZNF347	ENSG00000197937	94.5034	0.831808	0.00512769
[truncated: 1,286 more rows]

## Sheet: MvsO(O↓)
	Supplementary Table S4D.
	DEGs in NHDFs (padj < 0.05).
	Gene name	Ensembl ID	baseMean	log2FC	padj
1	ICAM1	ENSG00000090339	3183.01	-2.58835	6.60128e-149
2	LOXL4	ENSG00000138131	20202.2	-3.87419	4.95532e-122
3	IL27RA	ENSG00000104998	389.477	-2.48159	6.59051e-121
4	TBX5-AS1	ENSG00000255399	234.273	-4.31998	5.79941e-103
5	MEST	ENSG00000106484	927.651	-4.598	2.10608e-84
6	CPA4	ENSG00000128510	266.513	-3.48326	8.30942e-84
7	SEMA7A	ENSG00000138623	1024.69	-2.22508	8.00694e-83
8	RGCC	ENSG00000102760	2774.24	-2.6001	2.24311e-74
9	TBX5	ENSG00000089225	239.4	-2.71981	1.84747e-72
10	GATA2	ENSG00000179348	383.687	-3.397	2.2386e-70
11	ITGB5	ENSG00000082781	1502.2	-1.76294	6.7071e-69
12	LAMA5	ENSG00000130702	775.289	-2.89211	1.74976e-67
13	OLFML2A	ENSG00000185585	1098.28	-2.87177	3.66398e-62
14	LOXL3	ENSG00000115318	496.18	-2.42961	6.43621e-60
15	MEOX1	ENSG00000005102	140.449	-3.88295	7.2314e-58
16	KIF26B	ENSG00000162849	284.009	-4.4406	1.13737e-57
17	ACTG2	ENSG00000163017	770.78	-3.30926	8.98922e-57
18	ACP3	ENSG00000014257	457.023	-4.02225	4.97497e-52
19	LMOD1	ENSG00000163431	747.375	-1.66446	1.76949e-51
20	HOXC12	ENSG00000123407	60.7066	-3.32245	9.34359e-51
21	FBLN2	ENSG00000163520	5347.58	-1.5663	7.73958e-49
22	XG	ENSG00000124343	127.779	-3.56364	1.96991e-47
23	CCL7	ENSG00000108688	81.9944	-4.15885	6.2239e-44
24	WNT2	ENSG00000105989	214.105	-2.55744	3.15101e-43
25	DPYSL3	ENSG00000113657	2428.62	-1.36307	6.90559e-43
26	GLRX	ENSG00000173221	3615.2	-1.84014	1.66931e-42
27	LOXL2	ENSG00000134013	9800.41	-1.60955	6.60402e-42
28	ADAMTS14	ENSG00000138316	738.314	-2.74707	1.84981e-41
29	MARCKSL1	ENSG00000175130	274.739	-2.90123	9.11137e-41
30	C10orf105	ENSG00000214688	97.4815	-2.9	1.08261e-40
31	IRAG1	ENSG00000072952	622.955	-1.63967	1.49334e-40
32	CRELD1	ENSG00000163703	795.348	-2.47043	3.9139e-39
33	TSPAN9	ENSG00000011105	3627.46	-2.2591	4.64363e-39
34	SUMF1	ENSG00000144455	749.96	-1.42142	1.02362e-38
35	HCLS1	ENSG00000180353	180.253	-4.63161	2.56944e-38
36	AQP1	ENSG00000240583	891.403	-1.84147	2.65138e-38
37	HOXD12	ENSG00000170178	82.2078	-4.54941	4.99333e-38
38	CCL2	ENSG00000108691	1931.76	-2.07577	6.54303e-38
39	SH3BGRL2	ENSG00000198478	106.627	-2.78273	7.03084e-38
40	SLC20A2	ENSG00000168575	809.285	-1.12259	1.37601e-37
41	RAB7A	ENSG00000075785	2880.12	-0.984402	1.62646e-37
42	TWIST1	ENSG00000122691	309.697	-2.32681	7.15432e-37
43	TPST2	ENSG00000128294	801.184	-1.1662	8.36281e-37
44	RPL15	ENSG00000174748	11494.8	-1.57199	4.19922e-36
45	SOCS1	ENSG00000185338	387.391	-2.56959	5.85304e-36
46	PTK7	ENSG00000112655	3005.85	-1.54701	6.29521e-36
47	TNFRSF19	ENSG00000127863	328.8	-3.93249	7.6109e-36
48	JUP	ENSG00000173801	187.128	-2.97432	8.21986e-36
49	MAGED4B	ENSG00000187243	532.041	-4.05784	1.05732e-35
50	RFTN1	ENSG00000131378	517.874	-1.42955	3.80706e-35
51	DRAM1	ENSG00000136048	2646.89	-1.29714	9.43498e-35
52	MAPK13	ENSG00000156711	223.715	-1.67377	1.12017e-34
53	P4HA2	ENSG00000072682	3400.08	-1.59875	6.25636e-34
54	PIGS	ENSG00000087111	1556.6	-1.16121	7.24316e-34
55	COL4A2	ENSG00000134871	18036.7	-1.60922	7.41758e-34
56	RAC2	ENSG00000128340	349.357	-2.95974	9.03171e-34
57	USP4	ENSG00000114316	758.576	-1.03875	3.07595e-33
58	LFNG	ENSG00000106003	471.317	-2.99282	7.75513e-33
59	CCDC80	ENSG00000091986	4391.36	-0.99186	2.37903e-32
60	RNF207	ENSG00000158286	138.714	-1.73374	5.26661e-32
61	ENPP1	ENSG00000197594	185.284	-2.8124	9.40833e-32
62	IGF2BP1	ENSG00000159217	59.8319	-3.74998	3.56609e-31
63	MAGED4	ENSG00000154545	233.581	-4.27119	1.19686e-30
64	RPN1	ENSG00000163902	4704.96	-1.08614	3.5134e-30
65	PBX2	ENSG00000204304	1025.07	-1.01778	4.03024e-30
66	EEF1A1	ENSG00000156508	100521	-1.30359	6.12986e-30
67	ARHGEF25	ENSG00000240771	531.42	-1.3763	9.68049e-30
68	ITGA7	ENSG00000135424	140.561	-3.33961	1.69268e-29
69	CHRNA1	ENSG00000138435	41.2911	-2.70759	2.90657e-29
70	HOXD11	ENSG00000128713	679.431	-2.38871	6.54338e-29
71	CNN1	ENSG00000130176	199.103	-3.02734	1.80822e-28
72	SHOX2	ENSG00000168779	87.246	-3.53815	2.25382e-28
73	ALPL	ENSG00000162551	1077.84	-2.78896	4.00359e-28
74	WDR1	ENSG00000071127	7409.92	-0.887002	5.72947e-28
75	CUL7	ENSG00000044090	1163.97	-1.46073	6.10752e-28
76	BTN2A2	ENSG00000124508	268.329	-1.61203	9.30235e-28
77	ADA2	ENSG00000093072	89.0894	-2.624	1.05282e-27
78	MTHFD1L	ENSG00000120254	779.03	-0.852877	1.23057e-27
79	FAP	ENSG00000078098	761.597	-2.0728	1.64039e-27
80	ACTG1	ENSG00000184009	41217.3	-1.18968	2.48165e-27
81	ECHDC2	ENSG00000121310	501.335	-2.81859	2.51308e-27
82	PLAT	ENSG00000104368	2981.39	-1.61542	2.94308e-27
83	FUCA2	ENSG00000001036	1292.31	-1.07462	3.60983e-27
84	SH3TC1	ENSG00000125089	224.071	-2.21329	4.43634e-27
85	C6orf132	ENSG00000188112	83.9554	-2.67156	8.80537e-27
86	RCAN2	ENSG00000172348	275.758	-2.10097	1.91298e-26
87	IGF2BP2	ENSG00000073792	962.896	-1.52808	2.29393e-26
88	MIAT	ENSG00000225783	550.224	-1.52887	3.96491e-26
89	GJA5	ENSG00000265107	124.71	-1.797	6.10972e-26
90	ZDHHC3	ENSG00000163812	1222.81	-0.913397	6.34262e-26
91	OXTR	ENSG00000180914	2158.82	-1.46896	2.61308e-25
92	IER3	ENSG00000137331	530.773	-1.53875	4.94297e-25
93	CNN2	ENSG00000064666	4477.05	-1.49561	5.29011e-25
94	COL5A3	ENSG00000080573	2802.53	-1.4785	1.17146e-24
95	KCNAB3	ENSG00000170049	93.3947	-1.97141	2.10681e-24
96	POFUT2	ENSG00000186866	1211.29	-1.00442	2.98007e-24
97	EPHB2	ENSG00000133216	163.724	-1.81026	4.31853e-24
98	RXRB	ENSG00000204231	596.784	-1.6021	7.54356e-24
99	ATF6B	ENSG00000213676	1155.48	-1.37006	9.06372e-24
100	COL5A1	ENSG00000130635	15068.6	-1.41129	1.01673e-23
101	GAS6	ENSG00000183087	23135.9	-1.77874	1.20082e-23
102	GOLGB1	ENSG00000173230	1237.98	-0.818454	1.66771e-23
103	CDA	ENSG00000158825	75.2559	-4.64567	1.75811e-23
104	NEU1	ENSG00000204386	1083.25	-1.80494	2.21253e-23
105	FAM86DP	ENSG00000291223	310.044	-2.23871	6.9212e-23
106	TADA3	ENSG00000171148	855.703	-1.33085	1.45075e-22
107	TCF21	ENSG00000118526	47.4195	-2.62727	1.51926e-22
108	ACKR4	ENSG00000129048	300.529	-1.87566	1.60694e-22
109	CD4	ENSG00000010610	25.2559	-3.43848	2.07119e-22
110	CTHRC1	ENSG00000164932	776.717	-1.67897	2.07119e-22
111	ZBTB22	ENSG00000236104	303.438	-1.63175	2.22057e-22
112	VAT1L	ENSG00000171724	107.295	-2.88735	2.78739e-22
113	PTGDS	ENSG00000107317	420.536	-4.49196	3.21892e-22
114	GAL	ENSG00000069482	83.0456	-4.25316	3.43062e-22
115	NFKBIE	ENSG00000146232	427.233	-2.81148	5.4498e-22
116	QARS1	ENSG00000172053	2089.96	-1.38496	6.14039e-22
117	TUBB2A	ENSG00000137267	2238.36	-1.44517	6.98373e-22
118	BTD	ENSG00000169814	326.932	-0.92891	6.98373e-22
119	SLC7A2	ENSG00000003989	84.1308	-3.3368	1.09838e-21
120	CILP2	ENSG00000160161	50.3074	-2.75008	1.37613e-21
121	TKT	ENSG00000163931	5731.87	-1.1851	1.42558e-21
122	TENT5C	ENSG00000183508	342.312	-1.76857	1.82263e-21
123	SERPINF1	ENSG00000132386	1442.17	-2.16704	1.93416e-21
124	C6orf89	ENSG00000198663	1549.4	-0.945719	1.95028e-21
125	STING1	ENSG00000184584	940.593	-2.22835	1.97265e-21
126	BAG6	ENSG00000204463	1950.63	-1.40905	1.97265e-21
127	TBX15	ENSG00000092607	121.522	-2.34041	2.53925e-21
128	VPS52	ENSG00000223501	562.857	-1.44958	3.43969e-21
129	SDC4	ENSG00000124145	3211.52	-1.44566	4.45465e-21
130	―	ENSG00000256218	103.466	-3.16593	6.43536e-21
131	RPL14	ENSG00000188846	4382.68	-1.6339	1.06482e-20
132	―	ENSG00000302923	36.8632	-3.4919	1.21345e-20
133	DUSP8	ENSG00000184545	192.752	-2.03076	2.29441e-20
134	DVL3	ENSG00000161202	1504.81	-1.04859	2.63885e-20
135	GNAI2	ENSG00000114353	8194.61	-1.47726	2.96349e-20
136	ZBTB46	ENSG00000130584	108.473	-1.45335	2.9722e-20
137	HACL1	ENSG00000131373	148.623	-1.37098	3.33295e-20
138	TXNDC5	ENSG00000239264	3747.88	-1.14851	3.53825e-20
139	ECE1	ENSG00000117298	5801.31	-1.12938	3.61081e-20
140	CLDN11	ENSG00000013297	4570.55	-1.83114	4.52881e-20
141	VASH1	ENSG00000071246	222.907	-1.51282	4.57268e-20
142	CORIN	ENSG00000145244	2134.21	-1.87911	6.12222e-20
143	ARIH2	ENSG00000177479	759.388	-0.885182	6.30851e-20
144	ACAA1	ENSG00000060971	757.314	-1.63983	7.14561e-20
145	TMEM132A	ENSG00000006118	1084.88	-2.00898	7.14806e-20
146	MB21D2	ENSG00000180611	145.014	-1.90446	8.56649e-20
147	DPF3	ENSG00000205683	281.289	-1.25496	1.33675e-19
148	MOXD1	ENSG00000079931	1947.09	-1.48051	1.62776e-19
149	DDR1	ENSG00000204580	443.936	-1.50112	1.68161e-19
150	ITM2C	ENSG00000135916	1454.95	-1.30911	1.84692e-19
151	ACTR8	ENSG00000113812	300.769	-1.04814	2.10137e-19
152	FYN	ENSG00000010810	489.018	-1.0563	2.10372e-19
153	CHPF2	ENSG00000033100	2630.4	-1.00222	2.58339e-19
154	TMEM158	ENSG00000249992	1430.44	-1.55296	2.71712e-19
155	PRECSIT	ENSG00000255874	115.207	-1.6961	2.90287e-19
156	RAB32	ENSG00000118508	805.211	-1.58038	3.23534e-19
157	PXDN	ENSG00000130508	5635.87	-1.90033	3.4629e-19
158	RPL22L1	ENSG00000163584	674.778	-2.26899	3.68289e-19
159	CILP	ENSG00000138615	118.679	-2.12916	3.87771e-19
160	GALNT6	ENSG00000139629	455.471	-2.70874	3.90446e-19
161	SYNPO2	ENSG00000172403	412.546	-2.32046	4.0055e-19
162	FBLIM1	ENSG00000162458	1548.51	-1.28767	4.31545e-19
163	CLEC3B	ENSG00000163815	2265.97	-3.24377	4.72774e-19
164	RHOA	ENSG00000067560	6936.97	-0.84448	5.18203e-19
165	MCCC1	ENSG00000078070	266.229	-1.06284	6.54138e-19
166	CDX1	ENSG00000113722	56.3865	-2.29199	8.05546e-19
167	LAMA4	ENSG00000112769	1058.36	-1.68722	1.01703e-18
168	EMILIN1	ENSG00000138080	5878.03	-1.7488	1.14545e-18
169	DHX16	ENSG00000204560	433.882	-0.913982	2.01537e-18
170	CITED2	ENSG00000164442	5984.07	-1.50055	2.0478e-18
171	TRBC2	ENSG00000211772	144.059	-5.32562	2.08975e-18
172	ANO10	ENSG00000160746	984.537	-1.18557	2.24369e-18
173	RNF123	ENSG00000164068	489.633	-1.17925	3.46866e-18
174	SLC35B2	ENSG00000157593	1551.21	-1.38116	4.13024e-18
175	MMP7	ENSG00000137673	146.786	-1.71922	4.22245e-18
176	ISLR	ENSG00000129009	236.19	-2.14616	5.03894e-18
177	DDX39B	ENSG00000198563	3418.74	-1.03513	5.13962e-18
178	TIMP3	ENSG00000100234	12214.6	-1.74797	5.62635e-18
179	FNTB	ENSG00000257365	247.2	-1.05608	5.71531e-18
180	CDCP1	ENSG00000163814	615.387	-1.48634	6.46719e-18
181	MBNL1-AS1	ENSG00000229619	107.647	-1.65797	7.75872e-18
182	SIAH2	ENSG00000181788	287.649	-0.939552	8.80682e-18
183	ADAM19	ENSG00000135074	391.102	-1.54086	1.11322e-17
184	CPS1	ENSG00000021826	51.9093	-3.16956	1.51372e-17
185	SEC61A1	ENSG00000058262	11284.6	-1.05022	1.51372e-17
186	ACOT13	ENSG00000112304	209.456	-1.09848	1.58369e-17
187	LCNL1	ENSG00000214402	68.5297	-4.26972	1.58555e-17
188	PSMD2	ENSG00000175166	3525.7	-1.10059	1.91952e-17
189	TPM1	ENSG00000140416	3965.97	-0.941294	2.00825e-17
190	LZTS3	ENSG00000088899	337.934	-1.02135	2.14516e-17
191	SRF	ENSG00000112658	1204.33	-1.12035	2.44846e-17
192	KI270721.1	ENSG00000294171	48.8668	-5.41205	2.54888e-17
193	GMDS	ENSG00000112699	172.903	-1.63469	2.65884e-17
194	STRA6	ENSG00000137868	530.389	-1.92106	2.80879e-17
195	―	ENSG00000225339	391.365	-1.73006	2.9024e-17
196	CSRP1	ENSG00000159176	8769.3	-1.54787	3.73311e-17
197	CHST2	ENSG00000175040	397.524	-0.822262	5.50819e-17
198	FAM229B	ENSG00000203778	193.756	-1.79744	5.87698e-17
199	CCDC71	ENSG00000177352	161.709	-1.50934	7.3665e-17
200	MGLL	ENSG00000074416	5883.29	-0.914556	7.82003e-17
201	GABRE	ENSG00000102287	221.756	-1.56572	8.35618e-17
202	RARS2	ENSG00000146282	663.381	-1.19082	9.44113e-17
203	FANCE	ENSG00000112039	115.074	-1.45604	1.00292e-16
204	TMEM14B	ENSG00000137210	682.218	-1.13071	1.13034e-16
205	SCAP	ENSG00000114650	934.958	-1.0738	1.16159e-16
206	PC	ENSG00000173599	188.926	-1.66062	1.21089e-16
207	BDH1	ENSG00000161267	61.5516	-2.30286	1.30182e-16
208	ZNF76	ENSG00000065029	244.914	-1.2202	1.37231e-16
209	SIDT2	ENSG00000149577	1116.65	-1.10007	1.38813e-16
210	TMSB4X	ENSG00000205542	16404.5	-1.61567	1.56189e-16
211	COL1A2	ENSG00000164692	112753	-1.12129	1.61012e-16
212	BEGAIN	ENSG00000183092	152.554	-1.96965	1.78265e-16
213	COPG2IT1	ENSG00000286214	30.3528	-3.46522	1.81355e-16
214	OLFML3	ENSG00000116774	2919.27	-1.32053	2.52117e-16
215	NEDD4L	ENSG00000049759	460.04	-0.997714	2.80927e-16
216	MTMR14	ENSG00000163719	502.834	-1.48521	3.06068e-16
217	HSP90AB1	ENSG00000096384	9908.41	-0.867578	3.22702e-16
218	GSG1	ENSG00000111305	58.4595	-2.3882	3.26024e-16
219	PAX8-AS1	ENSG00000189223	1005.94	-0.697525	3.33945e-16
220	TNFRSF6B	ENSG00000243509	301.59	-3.19652	3.34639e-16
221	SEC13	ENSG00000157020	1603.38	-1.26435	3.60636e-16
222	AGPAT4	ENSG00000026652	113.721	-1.38681	4.53835e-16
223	SNED1	ENSG00000162804	270.518	-1.73325	4.77438e-16
224	ACO1	ENSG00000122729	1930.73	-1.13096	7.16943e-16
225	ATF7IP2	ENSG00000166669	27.6092	-3.92043	8.62077e-16
226	TEAD3	ENSG00000007866	1026.63	-1.2327	9.71058e-16
227	ACAT2	ENSG00000120437	1598.2	-0.944127	9.76946e-16
228	MAPKAPK3	ENSG00000114738	547.806	-1.1372	1.0108e-15
229	PDCD2	ENSG00000071994	435.75	-1.00851	1.07601e-15
230	FAM120B	ENSG00000112584	466.593	-1.0117	1.12652e-15
231	COL1A1	ENSG00000108821	168315	-1.70506	1.43857e-15
232	EBI3	ENSG00000105246	64.4837	-2.15208	1.46272e-15
233	TTYH3	ENSG00000136295	2680.94	-1.43764	1.9366e-15
234	ADAM8	ENSG00000151651	97.4063	-2.51842	2.05356e-15
235	ITGA5	ENSG00000161638	6421.08	-1.14117	2.0615e-15
236	MTCH1	ENSG00000137409	3618.99	-1.0925	2.33491e-15
237	SLC25A29	ENSG00000197119	354.303	-1.51674	2.83095e-15
238	SHROOM2	ENSG00000146950	117.21	-1.54801	2.92788e-15
239	EIF4G1	ENSG00000114867	4858.8	-1.02104	3.40661e-15
240	PRKCD	ENSG00000163932	535.338	-0.898554	3.75587e-15
241	GTF2H4	ENSG00000213780	302.374	-1.33011	3.75879e-15
242	VARS1	ENSG00000204394	1659.67	-1.3623	4.08213e-15
243	PPARD	ENSG00000112033	876.704	-1.19531	4.25769e-15
244	IP6K1	ENSG00000176095	679.936	-0.964835	4.95772e-15
245	WNK4	ENSG00000126562	74.2203	-2.97159	4.98155e-15
246	BAALC	ENSG00000164929	41.2993	-2.00585	5.15314e-15
247	LTBP2	ENSG00000119681	5228.9	-1.29667	5.29383e-15
248	FOXO4	ENSG00000184481	55.8305	-1.90504	6.68372e-15
249	RASL10B	ENSG00000270885	113.281	-2.03136	6.8562e-15
250	CALR	ENSG00000179218	20555.5	-1.36017	7.26733e-15
251	AIG1	ENSG00000146416	319.503	-1.10803	8.21203e-15
252	TMEM14C	ENSG00000111843	1597.49	-1.11015	8.2471e-15
253	RGL2	ENSG00000237441	527.775	-1.51073	8.48802e-15
254	FOXL2	ENSG00000183770	515.133	-1.87274	9.20614e-15
255	SLCO2A1	ENSG00000174640	31.768	-4.04445	1.2193e-14
256	GATA2-AS1	ENSG00000244300	32.5752	-2.89438	1.42288e-14
257	TJAP1	ENSG00000137221	467.646	-0.999248	1.64262e-14
258	HOXD13	ENSG00000128714	64.1907	-2.6401	1.64272e-14
259	NT5DC2	ENSG00000168268	963.468	-1.92142	1.7516e-14
260	LINC01391	ENSG00000244578	43.4682	-1.84456	1.77513e-14
261	IGFBP5	ENSG00000115461	14883.2	-1.8952	2.28785e-14
262	PNMA6A	ENSG00000235961	41.0124	-2.64903	2.30455e-14
263	DBN1	ENSG00000113758	3283.23	-1.71534	2.36322e-14
264	FOXD1	ENSG00000251493	70.7606	-2.05852	2.56029e-14
265	YIPF3	ENSG00000137207	2497.97	-1.34969	2.57188e-14
266	RPL32	ENSG00000144713	6785.53	-1.9778	2.65475e-14
267	BTN3A3	ENSG00000111801	352.22	-1.28035	2.67162e-14
268	TSPAN5	ENSG00000168785	2222.73	-0.905868	2.70864e-14
269	TATDN2	ENSG00000157014	749.114	-0.910245	2.75707e-14
270	RPS18	ENSG00000231500	9128.84	-1.57291	2.7919e-14
271	IL32	ENSG00000008517	2054.2	-2.46776	3.73162e-14
272	WDR6	ENSG00000178252	2277.81	-1.12369	3.86834e-14
273	DNM1	ENSG00000106976	1162.33	-1.81784	4.02338e-14
274	PDLIM4	ENSG00000131435	1431.99	-1.85833	4.02885e-14
275	HYAL2	ENSG00000068001	581.753	-1.41252	4.12569e-14
276	AARS2	ENSG00000124608	187.605	-1.2278	4.23792e-14
277	WNT2B	ENSG00000134245	635.637	-1.87961	5.23555e-14
278	S100A16	ENSG00000188643	3413.01	-1.86099	5.54227e-14
279	VASP	ENSG00000125753	1632.73	-1.12134	5.97783e-14
280	STK38	ENSG00000112079	687.955	-0.717224	6.54905e-14
281	SLC45A4	ENSG00000022567	114.966	-1.37417	6.89932e-14
282	CES4A	ENSG00000172824	133.123	-2.31731	7.25667e-14
283	CSRNP1	ENSG00000144655	365.448	-1.07324	8.4977e-14
284	MGAT4B	ENSG00000161013	2164.87	-1.18747	1.11444e-13
285	―	ENSG00000303745	232.382	-1.60764	1.29427e-13
286	DUSP22	ENSG00000112679	222.258	-1.0693	1.30952e-13
287	PDE9A	ENSG00000160191	65.5533	-2.05918	1.31009e-13
288	RPS10	ENSG00000124614	4235.29	-2.10951	1.33356e-13
289	TRIM55	ENSG00000147573	36.556	-2.9648	1.42122e-13
290	CASS4	ENSG00000087589	111.441	-2.76662	1.44489e-13
291	MOGS	ENSG00000115275	1677.05	-1.21399	1.44492e-13
292	L1CAM	ENSG00000198910	7184.56	-1.24389	1.62869e-13
293	RBM15B	ENSG00000259956	756.152	-1.0289	1.87629e-13
294	MAGED1	ENSG00000179222	8614.84	-0.99997	1.92617e-13
295	PTX3	ENSG00000163661	2337.92	-1.67713	1.95241e-13
296	ECI2	ENSG00000198721	793.207	-1.02189	2.58042e-13
297	RPL35A	ENSG00000182899	2771.22	-1.74699	2.65511e-13
298	PDIA5	ENSG00000065485	574.317	-1.39943	2.67676e-13
299	EIF2B5	ENSG00000145191	441.7	-0.869539	3.00709e-13
300	TAF11	ENSG00000064995	238.475	-1.03443	3.27706e-13
301	CALM3	ENSG00000160014	8211.87	-1.16364	3.60901e-13
302	DYNLT1	ENSG00000146425	469.939	-1.67644	3.66949e-13
303	MEX3A	ENSG00000254726	42.0484	-1.98487	4.34536e-13
304	ABCF1	ENSG00000204574	1026.94	-1.21436	4.35858e-13
305	NISCH	ENSG00000010322	2037.85	-1.19478	4.4982e-13
306	ADCY4	ENSG00000129467	334.639	-1.31915	5.53487e-13
307	CORO2B	ENSG00000103647	578.641	-1.69445	5.54267e-13
308	ACAD9	ENSG00000177646	563.493	-1.29865	5.6315e-13
309	IKBKE	ENSG00000263528	394.323	-1.42146	5.93937e-13
310	GLB1	ENSG00000170266	1102.31	-1.02481	6.31015e-13
311	SAYSD1	ENSG00000112167	131.322	-1.25696	6.66834e-13
312	CASTOR3P	ENSG00000291122	57.5085	-1.44063	6.81213e-13
313	COPG1	ENSG00000181789	2820.01	-0.877166	7.20273e-13
314	ZBTB9	ENSG00000213588	184.392	-0.941486	8.53294e-13
315	TPBG	ENSG00000146242	2564.74	-1.61117	8.68443e-13
316	VAMP8	ENSG00000118640	30.5311	-2.828	8.92503e-13
317	―	ENSG00000270504	134.531	-1.29972	9.44874e-13
318	PLXNA1	ENSG00000114554	2273.26	-0.895798	9.68704e-13
319	SBF2-AS1	ENSG00000246273	583.469	-1.07661	1.0223e-12
320	CXCL12	ENSG00000107562	62.725	-1.70184	1.03681e-12
321	SYNJ2	ENSG00000078269	218.611	-1.61122	1.0425e-12
322	DRP2	ENSG00000102385	46.3696	-2.07146	1.25218e-12
323	ADAMTSL5	ENSG00000185761	342.364	-1.62507	1.29995e-12
324	COL3A1	ENSG00000168542	27051.9	-1.34547	1.32938e-12
325	DLK2	ENSG00000171462	38.5905	-3.00501	1.46215e-12
326	LINC02941	ENSG00000236013	37.5132	-2.34596	1.52207e-12
327	ARHGEF35	ENSG00000213214	37.6625	-2.26685	1.667e-12
328	TTLL3	ENSG00000214021	942.337	-1.02536	1.82339e-12
329	TEAD2	ENSG00000074219	440.75	-1.28763	2.03724e-12
330	CARMN	ENSG00000249669	131.08	-1.85817	2.05415e-12
331	TAGLN	ENSG00000149591	23652.7	-1.99945	2.59381e-12
332	ZMYM3	ENSG00000147130	513.362	-0.975432	2.6786e-12
333	TBC1D22B	ENSG00000065491	186.632	-1.1299	2.83354e-12
334	JAGN1	ENSG00000171135	602.475	-1.41728	2.83354e-12
335	KRT19	ENSG00000171345	721.696	-2.51244	2.83354e-12
336	SMPD2	ENSG00000135587	102.333	-1.60897	3.04616e-12
337	CELSR3	ENSG00000008300	128.923	-1.35111	3.1599e-12
338	FSCN1	ENSG00000075618	5540.91	-1.24878	3.50201e-12
339	SLC6A8	ENSG00000130821	833.42	-1.12751	3.61415e-12
340	BDKRB2	ENSG00000168398	1172.43	-1.12904	3.64541e-12
341	FIG4	ENSG00000112367	239.068	-1.1727	3.71975e-12
342	IP6K2	ENSG00000068745	797.264	-1.00007	3.92168e-12
343	ADGRG6	ENSG00000112414	114.773	-2.69619	4.18428e-12
344	PRRT3	ENSG00000163704	155.665	-1.5058	4.40858e-12
345	APEH	ENSG00000164062	1140.1	-1.40028	4.40982e-12
346	MARVELD1	ENSG00000155254	3737.13	-1.14642	4.88677e-12
347	RPL4	ENSG00000174444	18547.4	-1.01519	4.97501e-12
348	SLC41A3	ENSG00000114544	546.036	-0.872092	5.4829e-12
349	RPL24	ENSG00000114391	4292.3	-2.05255	5.7027e-12
350	AKR1C3	ENSG00000196139	20.8254	-2.49135	5.80404e-12
351	HMGA1	ENSG00000137309	8985.85	-1.783	5.8918e-12
352	SQSTM1	ENSG00000161011	15763.8	-1.0235	7.24725e-12
353	DHX30	ENSG00000132153	647.03	-0.819238	7.3126e-12
354	SMAD3	ENSG00000166949	1369.31	-0.947076	8.35193e-12
355	CAMK1	ENSG00000134072	252.831	-1.60677	8.35773e-12
356	SLC39A7	ENSG00000112473	3496.26	-1.65845	8.6153e-12
357	RPL29	ENSG00000162244	6208.62	-1.76068	8.6153e-12
358	PCBP4	ENSG00000090097	2011.06	-1.7688	9.15447e-12
359	ABCC5	ENSG00000114770	452.131	-0.874623	9.83157e-12
360	SLC2A5	ENSG00000142583	13.8027	-3.94386	1.01416e-11
361	IL17RE	ENSG00000163701	94.1738	-2.04593	1.08114e-11
362	ADGRE2	ENSG00000127507	24.8645	-4.41578	1.18539e-11
363	AURKA	ENSG00000087586	785.714	-0.97231	1.19897e-11
364	CALCOCO1	ENSG00000012822	1541.8	-0.922756	1.30064e-11
365	ACY1	ENSG00000243989	355.563	-1.59697	1.4167e-11
366	MFAP2	ENSG00000117122	1138.78	-1.84809	1.46343e-11
367	LRCH3	ENSG00000186001	536.366	-0.781301	1.59034e-11
368	TFDP2	ENSG00000114126	345.322	-1.14921	1.59469e-11
369	TXNDC11	ENSG00000153066	726.678	-0.70016	1.61997e-11
370	TMEM183A	ENSG00000163444	589.438	-0.587999	1.6909e-11
371	FTL	ENSG00000087086	94416.4	-1.56927	1.84739e-11
372	BRD2	ENSG00000204256	1933.24	-0.836004	1.85657e-11
373	MRPL14	ENSG00000180992	408.231	-1.73465	1.90983e-11
374	LITAF	ENSG00000189067	3628.5	-0.838751	2.23782e-11
375	GNAS	ENSG00000087460	9758.94	-1.04382	2.40867e-11
376	RAF1	ENSG00000132155	1389.71	-0.890644	2.49362e-11
377	TUBB	ENSG00000196230	20367.8	-0.996994	2.60964e-11
378	TRIM8	ENSG00000171206	1693.69	-0.675176	2.6555e-11
379	PCYT1A	ENSG00000161217	1368.93	-0.759427	2.77464e-11
380	POMGNT2	ENSG00000144647	193.661	-1.09196	2.90707e-11
381	INMT	ENSG00000241644	103.714	-2.59264	3.18251e-11
382	RBM5	ENSG00000003756	1213.91	-0.918843	3.24827e-11
383	NDUFAF3	ENSG00000178057	497.363	-1.60438	3.38363e-11
384	KLC4	ENSG00000137171	115.002	-1.24967	3.4819e-11
385	CTDSPL	ENSG00000144677	969.924	-0.817182	3.53929e-11
386	KRT17	ENSG00000128422	866.174	-2.25189	4.10034e-11
387	FGFRL1	ENSG00000127418	359.808	-0.879183	4.11229e-11
388	NICN1	ENSG00000145029	211.02	-1.1758	4.1429e-11
389	ZNF703	ENSG00000183779	924.016	-1.72329	4.27357e-11
390	PAQR8	ENSG00000170915	112.967	-1.05714	4.28259e-11
391	GNL3	ENSG00000163938	577.223	-0.777057	4.51854e-11
392	TGIF2	ENSG00000118707	160.996	-1.50992	4.67333e-11
393	ROBO4	ENSG00000154133	75.0749	-1.88372	4.69719e-11
394	ZYX	ENSG00000159840	12647.6	-1.88652	4.70776e-11
395	KCNIP3	ENSG00000115041	647.658	-1.00626	4.77657e-11
396	IFNGR2	ENSG00000159128	1279.93	-0.780491	4.86378e-11
397	KLHDC3	ENSG00000124702	881.917	-1.94677	5.04236e-11
398	ULBP3	ENSG00000131019	34.4628	-2.47578	5.27376e-11
399	VWA7	ENSG00000204396	16.6905	-2.64985	7.04011e-11
400	DNAJB11	ENSG00000090520	639.917	-1.05597	7.4662e-11
401	UQCRC1	ENSG00000010256	2030.84	-1.53561	7.90473e-11
402	DCBLD2	ENSG00000057019	2916.18	-1.6994	8.07019e-11
403	ELK1	ENSG00000126767	626.169	-0.997494	8.238e-11
404	TIMMDC1	ENSG00000113845	544.845	-0.921929	8.32471e-11
405	ACTB	ENSG00000075624	54246.7	-1.07934	8.7165e-11
406	CTXN1	ENSG00000178531	353.58	-2.35047	8.73813e-11
407	GPX7	ENSG00000116157	358.252	-0.912719	9.94181e-11
408	―	ENSG00000236536	29.16	-2.56456	1.03026e-10
409	RPS12	ENSG00000112306	6926.93	-1.7032	1.06225e-10
410	HHIPL1	ENSG00000182218	467.469	-1.12387	1.09287e-10
411	CDKN2A	ENSG00000147889	197.711	-1.28159	1.09865e-10
412	TMT1B	ENSG00000170439	19.6837	-4.49818	1.10625e-10
413	TOR4A	ENSG00000198113	752.33	-0.750843	1.2192e-10
414	PCDHGB7	ENSG00000254122	113.781	-2.66481	1.54436e-10
415	PIGZ	ENSG00000119227	139.689	-1.64891	1.60088e-10
416	KDM1A	ENSG00000004487	876.588	-0.622016	1.69942e-10
417	FSTL5	ENSG00000168843	25.787	-4.18524	1.81169e-10
418	MMP24OS	ENSG00000126005	2387.26	-1.61357	1.82122e-10
419	―	ENSG00000230928	51.866	-3.22071	1.90869e-10
420	TFAP2A	ENSG00000137203	396.317	-1.25744	1.9133e-10
421	KRBOX1	ENSG00000240747	38.0085	-2.349	1.92805e-10
422	GALNT2	ENSG00000143641	3295.39	-0.746546	2.02823e-10
423	AGPAT1	ENSG00000204310	2434.59	-1.26785	2.0421e-10
424	―	ENSG00000279118	76.208	-1.16087	2.31563e-10
425	WLS	ENSG00000116729	5918.23	-1.15959	2.33072e-10
426	KLHDC8B	ENSG00000185909	213.746	-1.48145	2.5065e-10
427	QPCT	ENSG00000115828	719.205	-1.39457	2.52398e-10
428	MFAP4	ENSG00000166482	3373.36	-1.21911	2.73227e-10
429	EEF2	ENSG00000167658	29033.7	-0.900267	2.96231e-10
430	MARCHF10	ENSG00000173838	29.2477	-3.36551	2.9948e-10
431	NFE2	ENSG00000123405	23.8494	-2.69729	3.08625e-10
432	HMCES	ENSG00000183624	600.582	-1.2996	3.09328e-10
433	CARD16	ENSG00000204397	184.38	-1.82958	3.16492e-10
434	SMARCC1	ENSG00000173473	796.841	-1.37362	3.16925e-10
435	QPCTL	ENSG00000011478	454.295	-1.35425	3.2959e-10
436	RPL5	ENSG00000122406	6157.51	-0.885493	3.32236e-10
437	FLNA	ENSG00000196924	42005.7	-1.14461	3.39827e-10
438	PPIC	ENSG00000168938	699.177	-0.795691	3.42638e-10
439	DANCR	ENSG00000226950	273.925	-1.33183	3.46633e-10
440	NIPSNAP1	ENSG00000184117	1039.85	-0.865076	4.1909e-10
441	CLIC1	ENSG00000213719	6653	-1.06512	4.27556e-10
442	OAZ2	ENSG00000180304	1503.52	-0.705349	4.31012e-10
443	CD83	ENSG00000112149	159.509	-1.02854	4.42975e-10
444	PRRC2A	ENSG00000204469	3735.51	-1.29699	4.63165e-10
445	TPM2	ENSG00000198467	19561.6	-2.36077	4.71142e-10
446	ADAMTS12	ENSG00000151388	532.819	-1.17385	4.78017e-10
447	RBM6	ENSG00000004534	721.015	-0.976766	5.1064e-10
448	EEF1A1P19	ENSG00000249855	49.0206	-2.11055	5.33464e-10
449	XXYLT1	ENSG00000173950	235.544	-1.09133	5.58864e-10
450	FTH1	ENSG00000167996	63361.1	-1.4198	5.61851e-10
451	GAS6-DT	ENSG00000272695	212.496	-1.01404	5.87023e-10
452	USP19	ENSG00000172046	526.477	-0.760553	5.96136e-10
453	C6orf47	ENSG00000204439	321.334	-0.960564	5.96136e-10
454	DAXX	ENSG00000204209	849.442	-1.02786	6.11482e-10
455	HOXB2	ENSG00000173917	18.2043	-5.08272	6.17414e-10
456	PSMG4	ENSG00000180822	221.827	-1.25921	6.20302e-10
457	EMC3	ENSG00000125037	960.328	-1.20518	6.36352e-10
458	RING1	ENSG00000204227	691.369	-1.62688	6.44934e-10
459	NUP153-AS1	ENSG00000272269	42.4073	-2.21492	6.66279e-10
460	HCN2	ENSG00000099822	74.9504	-1.80588	6.76298e-10
461	ALG3	ENSG00000214160	668.053	-1.68613	6.8697e-10
462	GLT8D1	ENSG00000016864	935.187	-0.858142	7.60936e-10
463	TOMM6	ENSG00000214736	1151.21	-1.50884	7.72293e-10
464	GPRC5B	ENSG00000167191	53.9208	-2.00424	7.73783e-10
465	EPHB6	ENSG00000106123	368.561	-2.00476	7.83511e-10
466	ADCY10P1	ENSG00000290554	45.2893	-1.57185	7.84321e-10
467	CSNK2B	ENSG00000204435	1967.32	-1.61756	8.33579e-10
468	TBC1D7	ENSG00000145979	130.977	-1.28516	8.8232e-10
469	RTL10	ENSG00000215012	1012.82	-0.856829	9.73524e-10
470	P3H1	ENSG00000117385	1920.3	-1.04522	1.0118e-09
471	SUPT3H	ENSG00000196284	71.0383	-1.49022	1.03407e-09
472	AP2M1	ENSG00000161203	6620.73	-1.32856	1.0649e-09
473	REPS1	ENSG00000135597	294.051	-0.843772	1.09411e-09
474	MYL9	ENSG00000101335	24666.4	-2.15729	1.11956e-09
475	RPSA2	ENSG00000288920	311.281	-1.42408	1.14784e-09
476	SSC5D	ENSG00000179954	710.527	-1.79695	1.21135e-09
477	PPP1R11	ENSG00000204619	838.543	-1.28487	1.25043e-09
478	PINK1	ENSG00000158828	1044.52	-0.918379	1.25626e-09
479	ABCA4	ENSG00000198691	45.7885	-1.43246	1.2859e-09
480	PPM1M	ENSG00000164088	453.743	-1.42334	1.30903e-09
481	TUSC2	ENSG00000114383	399.129	-1.16576	1.3253e-09
482	FOXP1	ENSG00000114861	142.056	-1.70244	1.33657e-09
483	SLC6A7	ENSG00000011083	18.104	-3.84518	1.44746e-09
484	TPT1-AS1	ENSG00000170919	268.141	-0.778235	1.52345e-09
485	ALDH4A1	ENSG00000159423	432.296	-0.94659	1.68141e-09
486	TSPAN14	ENSG00000108219	1289.12	-0.650025	1.70673e-09
487	ABCC10	ENSG00000124574	475.055	-0.855016	1.74024e-09
488	SEPTIN9	ENSG00000184640	8679.04	-0.931511	1.7956e-09
489	PCCB	ENSG00000114054	326.863	-1.12327	1.86899e-09
490	EEF1A1P5	ENSG00000196205	407.49	-1.52109	1.89673e-09
491	LIPH	ENSG00000163898	19.3478	-2.45045	1.97065e-09
492	GTF2H5	ENSG00000272047	506.536	-1.25953	2.08223e-09
493	LAMB2	ENSG00000172037	6286.71	-1.29027	2.2044e-09
494	RTF2	ENSG00000022277	2182.58	-0.901855	2.23208e-09
495	P3H4	ENSG00000141696	715.313	-1.46358	2.29348e-09
496	SLC25A20	ENSG00000178537	269.04	-0.73157	2.30629e-09
497	LAMA2	ENSG00000196569	1564.2	-1.60953	2.31694e-09
498	SALL2	ENSG00000165821	48.5579	-1.72897	2.40371e-09
499	COX7A2	ENSG00000112695	906.84	-1.3549	2.49484e-09
500	BAP1	ENSG00000163930	873.629	-1.02848	2.51897e-09
501	SERPINH1	ENSG00000149257	8199.15	-1.06586	2.70383e-09
502	LYRM4	ENSG00000214113	445.789	-1.72193	2.86279e-09
503	MAGEH1	ENSG00000187601	180.436	-0.995962	3.06965e-09
504	MAP4	ENSG00000047849	8243.96	-0.949862	3.20449e-09
505	RASIP1	ENSG00000105538	31.746	-2.90126	3.26771e-09
506	FXR1	ENSG00000114416	786.955	-0.775652	3.29866e-09
507	ATG7	ENSG00000197548	747.526	-1.47859	3.41478e-09
508	ABT1	ENSG00000146109	198.806	-0.967819	3.42054e-09
509	MCAM	ENSG00000076706	93.1403	-1.05422	3.46461e-09
510	TRIM27	ENSG00000204713	861.643	-0.929951	3.47268e-09
511	CLEC16A	ENSG00000038532	554.376	-0.850387	3.47338e-09
512	LEMD2	ENSG00000161904	681.006	-0.951106	3.51654e-09
513	PCDHGA10	ENSG00000253846	74.7973	-2.90833	3.55156e-09
514	―	ENSG00000310226	135.439	-2.00456	3.55156e-09
515	SMYD3	ENSG00000185420	186.569	-0.963749	3.65775e-09
516	MRPS25	ENSG00000131368	639.564	-0.990654	3.81626e-09
517	HNRNPL	ENSG00000104824	2413.36	-0.666033	3.82538e-09
518	APCDD1L	ENSG00000198768	46.6288	-1.98236	4.071e-09
519	JAK3	ENSG00000105639	236.872	-1.86286	4.35809e-09
520	ADRA1D	ENSG00000171873	40.0813	-1.86886	4.84109e-09
521	TMEM44-AS2	ENSG00000229334	30.3592	-2.0928	5.07299e-09
522	―	ENSG00000287562	26.5985	-2.04564	5.09328e-09
523	TMEM131L	ENSG00000121210	168.831	-1.14649	5.11005e-09
524	HPS1	ENSG00000107521	1542.92	-0.849995	5.1664e-09
525	FAM131B-AS2	ENSG00000232533	362.71	-1.22952	5.47939e-09
526	―	ENSG00000261512	142.041	-1.36663	5.57877e-09
527	ALAS1	ENSG00000023330	789.134	-0.726893	5.64742e-09
528	SLC51A	ENSG00000163959	52.3963	-1.48175	5.64844e-09
529	KHDRBS3	ENSG00000131773	198.821	-0.886254	5.90299e-09
530	ZBTB47	ENSG00000114853	700.233	-0.96312	5.92482e-09
531	TUBA1A	ENSG00000167552	13484.4	-1.28908	6.20066e-09
532	SCIN	ENSG00000006747	13.0473	-4.17012	6.26536e-09
533	EMC10	ENSG00000161671	2475.59	-1.09169	6.30039e-09
534	PREP	ENSG00000085377	381.017	-0.825007	6.58651e-09
535	SDK1	ENSG00000146555	348.822	-0.98655	6.9231e-09
536	IFT27	ENSG00000100360	453.705	-1.01051	6.93038e-09
537	RPL23	ENSG00000125691	6488.3	-1.15044	7.15155e-09
538	XPO5	ENSG00000124571	556.257	-0.855365	7.27906e-09
539	CEROX1	ENSG00000260807	159.426	-1.69996	7.27906e-09
540	TMEM44	ENSG00000145014	290.139	-1.2508	7.43507e-09
541	PCOTH	ENSG00000205861	76.0886	-2.00753	7.44388e-09
542	CYB561A3	ENSG00000162144	1121.36	-0.972984	7.489e-09
543	ESYT1	ENSG00000139641	3934.45	-0.595457	7.64073e-09
544	OGG1	ENSG00000114026	296.091	-0.77059	7.82999e-09
545	THOC7	ENSG00000163634	314.003	-1.1444	8.03022e-09
546	DCHS1	ENSG00000166341	1475.48	-1.21495	8.03496e-09
547	APMAP	ENSG00000101474	2838.16	-0.689748	8.32065e-09
548	RASGRP1	ENSG00000172575	35.7903	-2.39299	8.44142e-09
549	MMP2	ENSG00000087245	12000.8	-1.16849	8.70775e-09
550	RPL17	ENSG00000265681	8750.47	-1.08053	8.91307e-09
551	ST6GALNAC6	ENSG00000160408	1710.88	-1.20437	8.92084e-09
552	TRHDE-AS1	ENSG00000236333	29.8319	-2.0249	1.06915e-08
553	FURIN	ENSG00000140564	1290.23	-0.789662	1.07198e-08
554	TGFB1	ENSG00000105329	1384.43	-1.29917	1.08785e-08
555	ARHGAP10	ENSG00000071205	871.72	-0.626859	1.16855e-08
556	SORT1	ENSG00000134243	727.747	-0.973354	1.21024e-08
557	CSF2	ENSG00000164400	19.9112	-3.22245	1.22984e-08
558	LHPP	ENSG00000107902	185.885	-1.44856	1.25537e-08
559	SLC25A6	ENSG00000169100	3525.43	-1.12323	1.26873e-08
560	SLC25A6	ENSG00000292334	3525.43	-1.12323	1.26873e-08
561	MRPL18	ENSG00000112110	357.905	-0.913204	1.2836e-08
562	TSPYL2	ENSG00000184205	2424.48	-1.22508	1.32088e-08
563	PDLIM7	ENSG00000196923	4874.26	-1.54864	1.32088e-08
564	BMP1	ENSG00000168487	1487.99	-1.11759	1.35152e-08
565	BID	ENSG00000015475	484.831	-0.926529	1.35395e-08
566	HPSE2	ENSG00000172987	20.6191	-2.26211	1.4113e-08
567	LTBP4	ENSG00000090006	3486.26	-1.21456	1.44053e-08
568	EPHB4	ENSG00000196411	987.266	-1.02459	1.46681e-08
569	EEFSEC	ENSG00000132394	225.334	-1.40938	1.46726e-08
570	GCAT	ENSG00000100116	317.767	-1.91365	1.53824e-08
571	COQ3	ENSG00000132423	58.7254	-1.35009	1.5665e-08
572	NRGN	ENSG00000154146	116.37	-3.12425	1.62457e-08
573	PEPD	ENSG00000124299	683.315	-0.767847	1.74368e-08
574	COLGALT1	ENSG00000130309	2638.88	-0.865899	1.74614e-08
575	HDLBP	ENSG00000115677	11885.9	-0.757036	1.9186e-08
576	IL17RC	ENSG00000163702	610.084	-1.48341	1.92605e-08
577	CUX1	ENSG00000257923	878.727	-0.766734	1.99536e-08
578	ETV5	ENSG00000244405	514.943	-0.945815	2.05552e-08
579	SH3BP5	ENSG00000131370	194.176	-1.29898	2.10501e-08
580	Y	ENSG00000295056	19.1267	-2.19546	2.10501e-08
581	RNF7	ENSG00000114125	667.979	-1.1279	2.13834e-08
582	EHD3	ENSG00000013016	2236.75	-0.829355	2.15936e-08
583	RPSA	ENSG00000168028	11440.9	-1.81734	2.25026e-08
584	CENPV	ENSG00000166582	69.3644	-1.56767	2.28686e-08
585	HOXB13	ENSG00000159184	33.7385	-2.77827	2.31453e-08
586	COL6A1	ENSG00000142156	114441	-0.97586	2.33876e-08
587	RPP21	ENSG00000241370	283.769	-1.61535	2.37408e-08
588	NES	ENSG00000132688	8192.33	-1.53001	2.72589e-08
589	LINC00960	ENSG00000242516	137.338	-0.815178	2.83147e-08
590	ATAT1	ENSG00000137343	243.176	-1.14477	2.88097e-08
591	STX1B	ENSG00000099365	151.572	-1.58723	2.91016e-08
592	SUFU	ENSG00000107882	509.294	-0.869015	2.92661e-08
593	EIF3F	ENSG00000175390	2743.49	-1.13059	2.98477e-08
594	PDGFRB	ENSG00000113721	5790.52	-0.914572	3.00481e-08
595	SLC15A3	ENSG00000110446	161.797	-1.58409	3.07992e-08
596	DEF6	ENSG00000023892	36.0455	-2.25064	3.14513e-08
597	GSTO2	ENSG00000065621	67.2854	-1.83869	3.27252e-08
598	IL34	ENSG00000157368	153.202	-1.49544	3.31219e-08
599	RUVBL1	ENSG00000175792	610.389	-0.981323	3.35796e-08
600	KCNH2	ENSG00000055118	37.5998	-1.5358	3.53742e-08
601	―	ENSG00000289560	206.439	-1.64784	3.53788e-08
602	MZF1-AS1	ENSG00000267858	461.246	-0.735343	3.54591e-08
603	SLC25A38	ENSG00000144659	454.976	-0.99806	3.71995e-08
604	LINC02701	ENSG00000250508	11.2209	-3.11191	3.98574e-08
605	RPS7	ENSG00000171863	3967.65	-1.19015	4.20888e-08
606	NDUFB4	ENSG00000065518	609.583	-1.10974	4.22057e-08
607	IFT122	ENSG00000163913	509.224	-1.02887	4.30818e-08
608	MXRA7	ENSG00000182534	3749.93	-0.664687	4.39297e-08
609	ARAP3	ENSG00000120318	352.596	-1.32569	4.45907e-08
610	MRC2	ENSG00000011028	9080.26	-0.920221	4.61548e-08
611	TFRC	ENSG00000072274	735.498	-1.88645	4.67992e-08
612	COL10A1	ENSG00000123500	27.0046	-2.71323	5.00181e-08
613	ZFAND3	ENSG00000156639	1097.96	-0.989698	5.23691e-08
614	ABHD14A	ENSG00000248487	200.556	-1.51286	5.34145e-08
615	RND2	ENSG00000108830	74.8953	-1.56275	5.42055e-08
616	RBM38	ENSG00000132819	177.311	-0.882164	5.43139e-08
617	TOP2B	ENSG00000077097	951.604	-0.978365	5.48632e-08
618	C11orf24	ENSG00000171067	1606.02	-0.989796	5.61146e-08
619	VEGFA	ENSG00000112715	526.678	-1.1282	5.81068e-08
620	LINC01621	ENSG00000235357	12.9521	-2.83168	5.93567e-08
621	CCDC167	ENSG00000198937	170.277	-2.35237	6.39327e-08
622	FUOM	ENSG00000148803	158.726	-2.13028	6.57731e-08
623	PXDC1	ENSG00000168994	630.47	-0.799973	6.73533e-08
624	LASP1	ENSG00000002834	10667.8	-0.63183	6.88133e-08
625	CTNNBIP1	ENSG00000178585	416.999	-0.920098	6.98265e-08
626	PYCR1	ENSG00000183010	1146.19	-1.00021	7.01129e-08
627	PRSS3	ENSG00000010438	31.609	-6.19723	7.27914e-08
628	H19	ENSG00000130600	25.1137	-5.92469	7.56539e-08
629	VWA1	ENSG00000179403	36.4413	-2.2546	7.70232e-08
630	RGS2	ENSG00000116741	118.943	-1.87313	7.7555e-08
631	PXMP2	ENSG00000176894	159.184	-1.63875	7.82791e-08
632	DXO	ENSG00000204348	234.654	-1.3331	7.8681e-08
633	ELP6	ENSG00000163832	325.408	-0.959728	7.86897e-08
634	ABHD10	ENSG00000144827	222.647	-0.659911	7.93827e-08
635	EIF2D	ENSG00000143486	676.646	-0.535123	8.43802e-08
636	STIMATE	ENSG00000213533	521.868	-0.592076	8.64997e-08
637	ADAMTS8	ENSG00000134917	37.4865	-1.65103	8.66648e-08
638	RIPK1	ENSG00000137275	548.208	-0.606539	8.66648e-08
639	TWF2	ENSG00000247596	1015.84	-1.12439	8.91616e-08
640	RNF5	ENSG00000204308	349.64	-1.23448	9.22596e-08
641	KIF9	ENSG00000088727	57.5729	-1.40905	9.47337e-08
642	TMEM217	ENSG00000172738	20.945	-2.33446	9.52583e-08
643	ILRUN	ENSG00000196821	1519.79	-1.16481	9.89597e-08
644	GYG1	ENSG00000163754	660.028	-0.791514	9.94067e-08
645	HEPH	ENSG00000089472	10.1784	-4.30141	1.00891e-07
646	LIMD1	ENSG00000144791	373.338	-1.1474	1.07202e-07
647	GLMP	ENSG00000198715	1525.08	-1.11039	1.09063e-07
648	SAMD10	ENSG00000130590	70.7374	-1.60888	1.09075e-07
649	PGAP6	ENSG00000129925	1804.77	-0.870248	1.10118e-07
650	ELFN2	ENSG00000166897	713.717	-0.843021	1.11414e-07
651	JARID2	ENSG00000008083	136.035	-1.09536	1.14066e-07
652	PKM	ENSG00000067225	43984.8	-0.970498	1.16043e-07
653	TMEM115	ENSG00000126062	1203.53	-1.30158	1.16495e-07
654	PPT2	ENSG00000221988	344.067	-1.07784	1.22114e-07
655	HHEX	ENSG00000152804	76.4422	-1.42452	1.22619e-07
656	SLC39A4	ENSG00000147804	168.236	-1.63453	1.25616e-07
657	―	ENSG00000272476	31.618	-1.46933	1.25616e-07
658	PTRHD1	ENSG00000184924	266.262	-1.34565	1.27147e-07
659	―	ENSG00000293429	89.0312	-1.29189	1.28743e-07
660	RGN	ENSG00000130988	39.265	-1.23148	1.32095e-07
661	ACTN1	ENSG00000072110	8564.06	-0.816475	1.3957e-07
662	MYO1D	ENSG00000176658	1294.42	-0.81414	1.44818e-07
663	HOXB-AS1	ENSG00000230148	12.1623	-3.94779	1.45334e-07
664	GORASP1	ENSG00000114745	758.603	-0.735068	1.48761e-07
665	LYPD6B	ENSG00000150556	31.7297	-1.90413	1.51185e-07
666	PAPLN-AS1	ENSG00000258376	49.0993	-1.30184	1.52032e-07
667	HYOU1	ENSG00000149428	2462.84	-0.690227	1.52185e-07
668	CYB561D2	ENSG00000114395	312.2	-1.35623	1.60007e-07
669	AKIRIN2	ENSG00000135334	378.825	-0.678068	1.69417e-07
670	PDSS2	ENSG00000164494	116.529	-0.890378	1.74002e-07
671	NKIRAS2	ENSG00000168256	560.411	-0.689556	1.74587e-07
672	SLC38A5	ENSG00000017483	139.604	-2.01797	1.75985e-07
673	LRRC1	ENSG00000137269	65.0855	-1.15116	1.83901e-07
674	BCAT2	ENSG00000105552	659.755	-1.48092	1.85556e-07
675	WRNIP1	ENSG00000124535	322.051	-0.827814	1.85556e-07
676	―	ENSG00000289100	2609.52	-2.48763	1.85556e-07
677	RTN2	ENSG00000125744	238.979	-1.50278	1.88469e-07
678	MSRB1	ENSG00000198736	326.992	-1.17683	1.8941e-07
679	DTNBP1	ENSG00000047579	164.992	-1.28248	1.90497e-07
680	RPL10A	ENSG00000198755	6155.05	-1.51607	2.07684e-07
681	ICAM5	ENSG00000105376	381.8	-0.600229	2.09387e-07
682	DOCK6	ENSG00000130158	656.218	-0.966446	2.12466e-07
683	CKAP4	ENSG00000136026	13026.5	-1.01764	2.19204e-07
684	ABHD16A	ENSG00000204427	542.847	-0.829253	2.23688e-07
685	SLC29A1	ENSG00000112759	281.93	-0.829041	2.28348e-07
686	CNOT10	ENSG00000182973	188.356	-0.822976	2.30595e-07
687	ABCF3	ENSG00000161204	731.373	-1.12399	2.31751e-07
688	COTL1	ENSG00000103187	5998.58	-0.969352	2.31855e-07
689	―	ENSG00000261888	38.8373	-1.45998	2.32303e-07
690	RPS24	ENSG00000138326	8727.31	-1.19138	2.39219e-07
691	SKIC2	ENSG00000204351	858.409	-1.20077	2.40509e-07
692	KANTR	ENSG00000232593	163.994	-0.958397	2.5563e-07
693	PARP3	ENSG00000041880	263.356	-0.724868	2.58994e-07
694	IGF2R	ENSG00000197081	2334.11	-1.51104	2.59737e-07
695	TRPC6	ENSG00000137672	82.1308	-1.44954	2.65336e-07
696	CMTM7	ENSG00000153551	337.017	-1.35809	2.66336e-07
697	ASMTL	ENSG00000169093	234.19	-1.20637	2.72705e-07
698	ASMTL	ENSG00000292339	234.19	-1.20637	2.72705e-07
699	BAIAP2-DT	ENSG00000226137	218.572	-0.992743	2.76496e-07
700	TMA7	ENSG00000232112	1651.6	-1.22156	2.80513e-07
701	CD248	ENSG00000174807	25030.5	-1.47389	2.82447e-07
702	SLC20A1	ENSG00000144136	5890.86	-1.12191	2.83242e-07
703	RPS2P5	ENSG00000240342	3246.82	-1.09149	2.87017e-07
704	―	ENSG00000258311	93.6819	-0.91652	2.88397e-07
705	POLR1H	ENSG00000066379	174.463	-1.40504	2.96401e-07
706	NELFE	ENSG00000204356	872.421	-1.39897	3.03581e-07
707	RAB15	ENSG00000139998	154.191	-0.786584	3.04686e-07
708	ICAM2	ENSG00000108622	17.9359	-3.02253	3.04694e-07
709	MZF1	ENSG00000099326	347.032	-0.896452	3.06761e-07
710	EPHA2	ENSG00000142627	945.873	-0.598446	3.08469e-07
711	EIF4B	ENSG00000063046	3797.73	-0.740387	3.1032e-07
712	THSD4	ENSG00000187720	1661.37	-1.24404	3.12937e-07
713	BHLHE41	ENSG00000123095	97.7405	-1.5789	3.30778e-07
714	TMEM242	ENSG00000215712	185.566	-0.709797	3.47604e-07
715	MSRA	ENSG00000175806	310.235	-0.965684	3.48748e-07
716	B4GALT1	ENSG00000086062	1843.38	-0.628584	3.56653e-07
717	TRIOBP	ENSG00000100106	2210	-0.761453	3.65196e-07
718	MED8	ENSG00000159479	592.387	-0.632263	3.65699e-07
719	MEIS3	ENSG00000105419	656.85	-1.66389	3.70363e-07
720	GABBR1	ENSG00000204681	844.251	-1.18758	3.94242e-07
721	CIDECP1	ENSG00000186162	60.9453	-1.71498	3.98209e-07
722	RPL6	ENSG00000089009	7794.02	-1.17995	4.02991e-07
723	PCDHGA9	ENSG00000261934	22.8885	-2.87729	4.0381e-07
724	RAB40B	ENSG00000141542	184.874	-0.675894	4.24132e-07
725	ALDH1A1	ENSG00000165092	345.031	-1.3048	4.2489e-07
726	GNL1	ENSG00000204590	1762.25	-1.34707	4.47769e-07
727	DIRAS3	ENSG00000162595	34.8129	-1.90774	4.51357e-07
728	PFDN6	ENSG00000204220	391.732	-1.35959	4.58703e-07
729	HIC1	ENSG00000177374	648.783	-1.06283	4.69734e-07
730	C8orf82	ENSG00000213563	417.544	-1.43134	4.71756e-07
731	TOMM34	ENSG00000025772	773.338	-0.986843	4.74947e-07
732	ABRACL	ENSG00000146386	234.131	-1.04696	4.85703e-07
733	RWDD1	ENSG00000111832	541.026	-1.01014	4.85822e-07
734	RPUSD3	ENSG00000156990	321.864	-1.40017	4.90078e-07
735	FBXW8	ENSG00000174989	441.529	-0.560173	4.99788e-07
736	PREX1	ENSG00000124126	85.0832	-1.45484	5.02117e-07
737	TXNRD3	ENSG00000197763	110.941	-1.09423	5.14386e-07
738	DZIP1L	ENSG00000158163	97.0603	-0.891806	5.15101e-07
739	TMEM250	ENSG00000238227	627.751	-0.793468	5.44213e-07
740	VSIR	ENSG00000107738	957.564	-1.36628	5.4498e-07
741	NELFCD	ENSG00000101158	653.713	-0.640985	5.4656e-07
742	PTPRD	ENSG00000153707	50.7769	-1.89302	5.5123e-07
743	LRRC17	ENSG00000128606	300.926	-1.26077	5.81859e-07
744	FOXP4	ENSG00000137166	246.427	-1.59061	5.87606e-07
745	UBE3D	ENSG00000118420	53.941	-1.07001	6.04984e-07
746	HOXD10	ENSG00000128710	562.02	-0.866225	6.11653e-07
747	KIAA1549L	ENSG00000110427	99.53	-1.65162	6.20145e-07
748	PLPPR2	ENSG00000105520	1629.25	-1.1962	6.21133e-07
749	MT1X	ENSG00000187193	58.4588	-1.83475	6.26967e-07
750	SLC43A2	ENSG00000167703	501.778	-0.936643	6.68923e-07
751	CCDC28A	ENSG00000024862	100.164	-1.24739	6.72375e-07
752	SMAP1	ENSG00000112305	248.378	-0.789654	6.86981e-07
753	―	ENSG00000284691	413.454	-1.60087	6.90055e-07
754	ISYNA1	ENSG00000105655	522.958	-1.4043	6.92543e-07
755	PPP2R5B	ENSG00000068971	461.322	-0.637479	6.997e-07
756	TCP1	ENSG00000120438	1385.15	-0.681495	7.18468e-07
757	VPS51	ENSG00000149823	793.404	-1.09244	7.20508e-07
758	PRIM2	ENSG00000146143	275.449	-0.707632	7.24176e-07
759	NUDT16	ENSG00000198585	751.045	-0.789947	7.25493e-07
760	ANXA2	ENSG00000182718	32660	-0.781195	7.83013e-07
761	PAPLN	ENSG00000100767	153.324	-0.662887	7.85812e-07
762	SYNGAP1	ENSG00000197283	501.718	-0.658301	7.89919e-07
763	ARPC4	ENSG00000241553	3483.22	-1.79947	7.89919e-07
764	TGFBI	ENSG00000120708	677.667	-1.18078	7.96545e-07
765	GMIP	ENSG00000089639	283.35	-0.856884	7.98106e-07
766	FRMD4A	ENSG00000151474	292.254	-0.832118	8.02744e-07
767	ST3GAL2	ENSG00000157350	597.044	-0.775188	8.30313e-07
768	PDHB	ENSG00000168291	699.559	-0.751412	8.43312e-07
769	NCSTN	ENSG00000162736	3251.15	-0.665369	8.56494e-07
770	TNFRSF1A	ENSG00000067182	2296.73	-0.744771	8.66479e-07
771	RRP36	ENSG00000124541	736.844	-1.15609	8.7632e-07
772	GTF3C6	ENSG00000155115	488.837	-1.02624	8.79639e-07
773	C1QTNF1	ENSG00000173918	894.282	-1.16902	8.79639e-07
774	SGSH	ENSG00000181523	1422.6	-1.2056	9.12987e-07
775	TLCD2	ENSG00000185561	115.087	-0.947284	9.17757e-07
776	MMP24	ENSG00000125966	46.9429	-1.20494	9.1849e-07
777	RPL3	ENSG00000100316	17352.1	-1.07042	9.29277e-07
778	MCM3	ENSG00000112118	526.883	-0.597395	9.34888e-07
779	CAMK2N2	ENSG00000163888	50.5619	-1.78443	9.55496e-07
780	DDOST	ENSG00000244038	6256.58	-0.491328	9.55496e-07
781	TSTD3	ENSG00000279170	78.2111	-0.985785	9.64493e-07
782	SRPX2	ENSG00000102359	1954.66	-0.431805	9.72888e-07
783	SZRD1	ENSG00000055070	2889.39	-0.637217	9.79568e-07
784	KATNA1	ENSG00000186625	162.533	-0.761533	9.87382e-07
785	IQSEC1	ENSG00000144711	817.152	-0.82039	1.02012e-06
786	RMND1	ENSG00000155906	143.135	-0.692698	1.02532e-06
787	COPB2	ENSG00000184432	2357.14	-0.848053	1.02551e-06
788	LIMS2	ENSG00000072163	887.277	-1.93731	1.04639e-06
789	PLEKHA6	ENSG00000143850	505.986	-0.772921	1.04639e-06
790	TRHDE	ENSG00000072657	60.3851	-2.34837	1.07058e-06
791	FAM234A	ENSG00000167930	2069.36	-1.46761	1.115e-06
792	CERCAM	ENSG00000167123	5697.8	-1.01105	1.11556e-06
793	TPMT	ENSG00000137364	141.389	-0.925174	1.12216e-06
794	KDELR1	ENSG00000105438	5440.7	-0.901744	1.14215e-06
795	COX17	ENSG00000138495	100.832	-1.30857	1.16072e-06
796	CHMP6	ENSG00000176108	359.759	-1.56167	1.22683e-06
797	PSMB1	ENSG00000008018	1781.41	-1.44392	1.26028e-06
798	ARID5A	ENSG00000196843	370.479	-1.29278	1.26028e-06
799	MFSD4B	ENSG00000173214	120.729	-1.11048	1.26874e-06
800	RDH5	ENSG00000135437	212.585	-1.37163	1.28221e-06
801	UROS	ENSG00000188690	765.981	-0.691262	1.28342e-06
802	HIF1AN	ENSG00000166135	1097.51	-0.446935	1.30678e-06
803	BTBD9	ENSG00000183826	216.076	-0.898492	1.32317e-06
804	EIF3L	ENSG00000100129	3867.2	-0.796888	1.33214e-06
805	SNX9	ENSG00000130340	615.082	-0.936508	1.33523e-06
806	FLOT1	ENSG00000137312	2038.16	-1.25437	1.34001e-06
807	OAF	ENSG00000184232	1201.65	-1.12298	1.34183e-06
808	TDRD9	ENSG00000156414	15.4619	-6.88558	1.37e-06
809	LINC01340	ENSG00000250331	18.7081	-1.90085	1.38835e-06
810	MFSD2B	ENSG00000205639	12.9576	-3.02898	1.39122e-06
811	PEDS1	ENSG00000240849	848.05	-0.835934	1.40515e-06
812	MBOAT7	ENSG00000125505	2789.47	-1.03066	1.44614e-06
813	SF3B5	ENSG00000169976	1139.19	-1.86201	1.49337e-06
814	KHDC1	ENSG00000135314	45.1798	-1.50311	1.50151e-06
815	TRAPPC1	ENSG00000170043	2349.44	-1.39739	1.50712e-06
816	SOX4	ENSG00000124766	185.575	-1.59913	1.51641e-06
817	NONO	ENSG00000147140	3631.32	-0.505338	1.5781e-06
818	―	ENSG00000280064	106.665	-1.42109	1.59722e-06
819	TSPYL1	ENSG00000189241	746.237	-1.14255	1.6261e-06
820	ANGPTL4	ENSG00000167772	288.643	-1.55912	1.71915e-06
821	PLK3	ENSG00000173846	583.271	-0.640369	1.74928e-06
822	PRAC2	ENSG00000229637	7.92339	-4.02009	1.74928e-06
823	ETNK2	ENSG00000143845	258.496	-0.992333	1.77817e-06
824	LINC02432	ENSG00000248810	13.7024	-2.17772	1.80349e-06
825	POU5F1	ENSG00000204531	19.7088	-2.6388	1.90082e-06
826	GMEB2	ENSG00000101216	286.611	-0.958622	1.91259e-06
827	NR2F2-AS1	ENSG00000247809	90.7608	-0.908527	1.92717e-06
828	CCDC81	ENSG00000149201	89.9452	-1.22363	1.94786e-06
829	―	ENSG00000254458	55.222	-1.26569	1.97524e-06
830	MFSD13A	ENSG00000138111	22.323	-2.17312	2.01559e-06
831	LY6G5B	ENSG00000240053	232.508	-1.39538	2.0214e-06
832	MYO1C	ENSG00000197879	5587.39	-0.698076	2.06127e-06
833	FIBCD1	ENSG00000130720	229.685	-1.30655	2.08825e-06
834	OTUD5	ENSG00000068308	1085.04	-0.746589	2.11481e-06
835	ZSCAN9	ENSG00000137185	82.2011	-0.999317	2.11776e-06
836	TMEM42	ENSG00000169964	191.726	-1.027	2.21945e-06
837	GRIN2D	ENSG00000105464	60.4645	-1.85075	2.23584e-06
838	APOL1	ENSG00000100342	44.6094	-1.11955	2.2394e-06
839	SENP5	ENSG00000119231	331.457	-0.55605	2.25835e-06
840	PRR3	ENSG00000204576	181.04	-1.00016	2.27981e-06
841	RBSN	ENSG00000131381	324.656	-0.630179	2.30824e-06
842	CA11	ENSG00000063180	37.9695	-1.79302	2.32556e-06
843	LRP10	ENSG00000197324	7697.26	-0.615967	2.32556e-06
844	TMED9	ENSG00000184840	5009.17	-1.00568	2.33109e-06
845	NECAP2	ENSG00000157191	1697.89	-0.818429	2.35118e-06
846	DCAF11	ENSG00000100897	671.682	-0.741907	2.38741e-06
847	―	ENSG00000285725	228.815	-1.49996	2.43366e-06
848	PLXND1	ENSG00000004399	1277.83	-0.896759	2.45668e-06
849	PLEKHA2	ENSG00000169499	180.151	-1.14015	2.51349e-06
850	POLR1C	ENSG00000171453	347.904	-1.0137	2.53075e-06
851	FHOD1	ENSG00000135723	722.504	-0.572477	2.57088e-06
852	DNASE2	ENSG00000105612	661.35	-0.74888	2.57239e-06
853	EFHC1	ENSG00000096093	274.465	-0.69533	2.57953e-06
854	RPS15A	ENSG00000134419	4368.25	-1.17035	2.57986e-06
855	PPP1R13B	ENSG00000088808	115.234	-0.874128	2.59795e-06
856	GJD3	ENSG00000183153	145.845	-1.19356	2.5987e-06
857	PLD1	ENSG00000075651	169.69	-0.939992	2.61828e-06
858	―	ENSG00000290993	114.737	-0.974505	2.64268e-06
859	RPL26	ENSG00000161970	4608.36	-1.18897	2.68077e-06
860	LINC00578	ENSG00000228221	27.5481	-1.47787	2.68077e-06
861	SMPD1	ENSG00000166311	2991.51	-0.936323	2.68906e-06
862	SNRPC	ENSG00000124562	1024.1	-1.15507	2.70216e-06
863	FAM20A	ENSG00000108950	329.235	-0.738354	2.73072e-06
864	C17orf49	ENSG00000258315	1038.77	-1.53834	2.77575e-06
865	EXOSC7	ENSG00000075914	472.834	-1.28056	2.77799e-06
866	CDKAL1	ENSG00000145996	75.6348	-0.95143	2.83306e-06
867	FMNL1-DT	ENSG00000267121	25.9297	-1.46422	2.8498e-06
868	JUND	ENSG00000130522	1401.39	-1.04749	2.85683e-06
869	PPP1R18	ENSG00000146112	2039.11	-0.997983	2.90821e-06
870	RASD1	ENSG00000108551	24.8311	-1.71832	2.93372e-06
871	HSPA1A	ENSG00000204389	1256	-0.914687	2.96379e-06
872	RAP2B	ENSG00000181467	400.644	-0.634641	3.02726e-06
873	CAPZB	ENSG00000077549	5824.19	-0.811849	3.0331e-06
874	CCDC174	ENSG00000154781	174.329	-0.718751	3.15331e-06
875	TNFRSF10D	ENSG00000173530	2004.36	-0.67888	3.16953e-06
876	SLC25A23	ENSG00000125648	670.165	-1.15187	3.20476e-06
877	PLOD1	ENSG00000083444	10381.6	-0.96817	3.22472e-06
878	RFLNB	ENSG00000183688	505.308	-0.566365	3.24345e-06
879	HDDC2	ENSG00000111906	331.265	-0.987889	3.24755e-06
880	DTX3	ENSG00000178498	509.936	-1.00424	3.27312e-06
881	NAGPA	ENSG00000103174	257.741	-0.996126	3.34089e-06
882	SIX2	ENSG00000170577	449.725	-1.03561	3.42578e-06
883	TRIM38	ENSG00000112343	454.603	-0.457527	3.46719e-06
884	IPO4	ENSG00000196497	822.109	-0.721688	3.51327e-06
885	SFRP1	ENSG00000104332	2937.21	-1.52647	3.524e-06
886	TMEM63B	ENSG00000137216	863.185	-1.04869	3.52879e-06
887	DAG1	ENSG00000173402	1661.28	-1.1318	3.55725e-06
888	NIT2	ENSG00000114021	477.628	-0.826227	3.64484e-06
889	―	ENSG00000279753	665.529	-2.93196	3.70134e-06
890	TAPBP	ENSG00000231925	2243.7	-1.33491	3.73333e-06
891	FGFR1	ENSG00000077782	5823.35	-0.484661	3.74708e-06
892	PCSK9	ENSG00000169174	351.376	-0.578804	3.74824e-06
893	FLOT2	ENSG00000132589	1454.43	-1.36032	3.80075e-06
894	NCBP2AS2	ENSG00000270170	115.434	-1.14463	3.87575e-06
895	STXBP2	ENSG00000076944	26.2278	-3.57628	3.99062e-06
896	SLC22A4	ENSG00000197208	241.15	-0.676757	4.13517e-06
897	ECHDC3	ENSG00000134463	31.7918	-1.60826	4.15272e-06
898	MEA1	ENSG00000124733	1858.49	-1.2927	4.20804e-06
899	TIMM8B	ENSG00000150779	371.68	-1.05768	4.28394e-06
900	UMPS	ENSG00000114491	265.153	-0.752185	4.30818e-06
901	COL8A1	ENSG00000144810	1714.39	-1.08714	4.36467e-06
902	MON1A	ENSG00000164077	244.495	-1.29913	4.37147e-06
903	RPL18A	ENSG00000105640	11006.5	-1.46729	4.50058e-06
904	RPL7L1	ENSG00000146223	832.282	-0.686827	4.52906e-06
905	EEF1G	ENSG00000254772	24349.5	-1.13056	4.56543e-06
906	FAM162A	ENSG00000114023	407.725	-1.14283	4.57406e-06
907	SPEG	ENSG00000072195	853.597	-1.08118	4.59356e-06
908	―	ENSG00000290931	10.76	-5.36073	4.59629e-06
909	TCF3	ENSG00000071564	1039.83	-0.447222	4.63074e-06
910	RRAS	ENSG00000126458	3159.41	-1.29469	4.66259e-06
911	―	ENSG00000291105	119.815	-1.47523	4.66259e-06
912	ZSCAN16-AS1	ENSG00000269293	100.834	-1.67686	4.70683e-06
913	TLE5	ENSG00000104964	6161.07	-1.09134	4.71701e-06
914	NPW	ENSG00000183971	51.4898	-2.63884	4.7267e-06
915	―	ENSG00000290146	121.68	-1.23239	5.03019e-06
916	WDTC1	ENSG00000142784	933.708	-0.691289	5.03278e-06
917	P4HTM	ENSG00000178467	587.93	-0.924083	5.03278e-06
918	SERPINE1	ENSG00000106366	20166	-0.822461	5.08043e-06
919	―	ENSG00000287673	22.815	-1.55587	5.10767e-06
920	MICAL2	ENSG00000133816	1351.51	-0.929972	5.27595e-06
921	MOCS1	ENSG00000124615	217.132	-1.22293	5.3454e-06
922	GNPDA1	ENSG00000113552	1111.17	-0.717698	5.38815e-06
923	RPS29	ENSG00000213741	2016.01	-1.34693	5.56122e-06
924	C6orf136	ENSG00000204564	118.229	-1.03175	5.80113e-06
925	PXDNL	ENSG00000147485	14.6469	-2.12367	5.807e-06
926	SOD2	ENSG00000291237	2069.88	-1.0961	5.86177e-06
927	DNAJB5	ENSG00000137094	197.458	-0.667337	5.94497e-06
928	NCKAP5L	ENSG00000167566	678.322	-0.943854	5.9539e-06
929	F2RL2	ENSG00000164220	668.566	-1.17071	6.07321e-06
930	SRPRB	ENSG00000144867	1235.87	-0.791585	6.23762e-06
931	CD74	ENSG00000019582	21.8046	-1.98437	6.29209e-06
932	EVI5L	ENSG00000142459	718.058	-0.883433	6.31788e-06
933	RIPOR2	ENSG00000111913	29.8749	-1.16499	6.32035e-06
934	ACOX2	ENSG00000168306	164.669	-0.629784	6.43619e-06
935	MME	ENSG00000196549	5843.92	-1.15785	6.49737e-06
936	YPEL3	ENSG00000090238	359.594	-1.3868	6.56593e-06
937	MINDY4	ENSG00000106125	478.662	-0.894094	6.65085e-06
938	PSMD6	ENSG00000163636	625.677	-0.660686	6.72061e-06
939	MOSPD3	ENSG00000106330	317.062	-1.2096	6.86512e-06
940	GRIA3	ENSG00000125675	417.015	-0.96938	6.96332e-06
941	CRTAP	ENSG00000170275	3495.5	-0.588975	7.01359e-06
942	RPS20	ENSG00000008988	6107.6	-1.10976	7.04009e-06
943	GLDN	ENSG00000186417	12.7321	-1.82818	7.08217e-06
944	CDKN1A	ENSG00000124762	15512.9	-0.833099	7.12904e-06
945	PSORS1C1	ENSG00000204540	47.9116	-1.71017	7.16573e-06
946	PRAC1	ENSG00000159182	8.3711	-6.57552	7.26475e-06
947	―	ENSG00000279821	90.4861	-1.3435	7.28838e-06
948	KDM5C	ENSG00000126012	979.683	-0.589411	7.29655e-06
949	DCTN1	ENSG00000204843	3211.24	-0.852789	7.32399e-06
950	SPNS1	ENSG00000169682	1265.06	-1.081	7.33228e-06
951	RPL37A	ENSG00000197756	8915.68	-1.27087	7.41887e-06
952	RPS8	ENSG00000142937	8538.46	-1.05353	7.4253e-06
953	PLXNB1	ENSG00000164050	359.393	-0.900435	7.4253e-06
954	CHCHD6	ENSG00000159685	134.668	-1.36184	7.51277e-06
955	ZNRF1	ENSG00000186187	371.883	-0.668655	7.6054e-06
956	HOXD-AS2	ENSG00000237380	46.1529	-1.10188	7.64317e-06
957	PNISR-AS1	ENSG00000228506	41.3016	-1.41926	7.78217e-06
958	MAP3K4	ENSG00000085511	152.816	-0.90997	7.80082e-06
959	TCF7L1	ENSG00000152284	422.615	-1.12569	7.93577e-06
960	JUNB	ENSG00000171223	1678.96	-0.876266	7.95007e-06
961	GGCX	ENSG00000115486	766.691	-0.553409	8.1264e-06
962	RAB1B	ENSG00000174903	4109.69	-0.816205	8.17369e-06
963	PCAT6	ENSG00000228288	55.1389	-1.67989	8.23878e-06
964	TNFRSF18	ENSG00000186891	17.4549	-4.02791	8.46029e-06
965	ADAMTS6	ENSG00000049192	180.905	-1.23951	8.46381e-06
966	COL6A3	ENSG00000163359	41783.9	-1.17452	8.48491e-06
967	SIRT5	ENSG00000124523	121.731	-0.678562	8.50521e-06
968	GPM6B	ENSG00000046653	17.8719	-2.70896	8.68152e-06
969	MAP6D1	ENSG00000180834	34.1396	-1.9498	9.05991e-06
970	FBN2	ENSG00000138829	4461.4	-1.66243	9.15271e-06
971	AHI1	ENSG00000135541	142.89	-1.06193	9.35905e-06
972	RNF10	ENSG00000022840	2076.12	-0.58802	9.7172e-06
973	RACK1	ENSG00000204628	17289	-1.1278	9.71905e-06
974	MICAL1	ENSG00000135596	1118.94	-1.01181	9.78387e-06
975	―	ENSG00000302786	22.6855	-1.84524	9.78573e-06
976	PHYHD1	ENSG00000175287	253.135	-1.30164	9.87439e-06
977	―	ENSG00000263020	280.938	-1.98429	9.88652e-06
978	UBL7	ENSG00000138629	777.464	-1.18586	1.00138e-05
979	FRRS1	ENSG00000156869	69.6774	-1.05835	1.00138e-05
980	MYBL2	ENSG00000101057	405.225	-1.23466	1.01118e-05
981	CHRDL1	ENSG00000101938	23.1078	-2.01401	1.01445e-05
982	TNIP1	ENSG00000145901	1447.15	-0.922452	1.02053e-05
983	BTN3A2	ENSG00000186470	584.543	-0.650359	1.03743e-05
984	PGF	ENSG00000119630	373.331	-1.57979	1.04357e-05
985	DEXI	ENSG00000182108	931.144	-0.943348	1.07512e-05
986	RNF217-AS1	ENSG00000236548	16.9286	-1.80142	1.07512e-05
987	PWWP3A	ENSG00000160953	686.911	-0.905131	1.07995e-05
988	ADAMTSL4	ENSG00000143382	344.636	-0.998972	1.08221e-05
989	RPS14	ENSG00000164587	6375.08	-1.18762	1.08566e-05
990	LSM3	ENSG00000170860	300.981	-1.2026	1.09172e-05
991	LINC02614	ENSG00000241288	88.3222	-1.29978	1.12364e-05
992	IMPDH2	ENSG00000178035	2356.84	-0.973654	1.13168e-05
993	EPB41L2	ENSG00000079819	725.065	-0.897515	1.16501e-05
994	DNPH1	ENSG00000112667	383.204	-1.43817	1.16501e-05
995	SOX8	ENSG00000005513	41.3032	-1.39144	1.16911e-05
996	CORO1B	ENSG00000172725	1430.91	-0.853439	1.1833e-05
997	TRBV12-4	ENSG00000276953	25.9283	-1.56127	1.19095e-05
998	―	ENSG00000260293	34.3963	-1.36962	1.19844e-05
999	PDLIM3	ENSG00000154553	10.8066	-2.49805	1.2141e-05
1000	GPER1	ENSG00000164850	16.6756	-2.0778	1.23547e-05
1001	RPS4X	ENSG00000198034	8304.02	-1.07189	1.24121e-05
1002	ANKRD2	ENSG00000165887	8.96243	-4.59596	1.25209e-05
1003	ERICD	ENSG00000280303	25.8003	-1.36426	1.25537e-05
1004	MIR646HG	ENSG00000228340	8.08775	-5.11594	1.28227e-05
1005	MXD4	ENSG00000123933	2024.31	-0.774765	1.30529e-05
1006	―	ENSG00000269604	232.042	-0.632943	1.32447e-05
1007	NATD1	ENSG00000274180	213.234	-0.758237	1.32644e-05
1008	TFEB	ENSG00000112561	170.59	-1.62325	1.32692e-05
1009	CD14	ENSG00000170458	12.4544	-1.98158	1.34882e-05
1010	SPCS1	ENSG00000114902	1398.2	-0.968857	1.37764e-05
1011	PLA2G15	ENSG00000103066	839.934	-0.898725	1.43794e-05
1012	ETV4	ENSG00000175832	515.334	-1.32409	1.44753e-05
1013	DCHS1-AS1	ENSG00000255390	232.422	-2.0219	1.46114e-05
1014	FAM86FP	ENSG00000290940	84.9613	-0.983895	1.47611e-05
1015	SH3BP1	ENSG00000100092	308.158	-1.25722	1.51211e-05
1016	GPX4	ENSG00000167468	4838.31	-1.59526	1.51331e-05
1017	BHLHE40	ENSG00000134107	395.639	-1.45401	1.52154e-05
1018	CD99L2	ENSG00000102181	2272.8	-0.683167	1.52703e-05
1019	VASN	ENSG00000168140	2904.71	-0.77085	1.54125e-05
1020	PDIA4	ENSG00000155660	3427.02	-0.473964	1.55226e-05
1021	SLC35C2	ENSG00000080189	711.758	-1.10672	1.58609e-05
1022	TNIK	ENSG00000154310	46.0521	-1.50616	1.63361e-05
1023	ZNF362	ENSG00000160094	292.528	-0.827566	1.66802e-05
1024	NFKB2	ENSG00000077150	1102.83	-0.721332	1.67609e-05
1025	RPL7A	ENSG00000148303	9934.17	-1.03558	1.75151e-05
1026	HOXD9	ENSG00000128709	929.574	-1.68288	1.76248e-05
1027	VEPH1	ENSG00000197415	126.444	-0.738961	1.79978e-05
1028	―	ENSG00000306517	354.084	-0.821759	1.8034e-05
1029	STK32A	ENSG00000169302	10.5926	-2.26568	1.84097e-05
1030	TCEAL4	ENSG00000133142	1436.39	-0.721636	1.87028e-05
1031	RPL30	ENSG00000156482	4233.75	-0.882474	1.87793e-05
1032	MRPS18A	ENSG00000096080	385.088	-1.35464	1.88076e-05
1033	VAT1	ENSG00000108828	7834.46	-0.644572	1.89418e-05
1034	TP53	ENSG00000141510	908.879	-1.02376	1.90671e-05
1035	INTS3	ENSG00000143624	1955.57	-0.602057	1.96571e-05
1036	GMDS-DT	ENSG00000250903	43.8212	-1.07706	1.99304e-05
1037	ATP1B3	ENSG00000069849	1890.27	-0.506194	1.99339e-05
1038	AP1B1	ENSG00000100280	2072.66	-0.796078	2.00924e-05
1039	GDF11	ENSG00000135414	331.291	-0.69003	2.02603e-05
1040	―	ENSG00000307802	93.4314	-2.20194	2.04654e-05
1041	UBXN6	ENSG00000167671	1805.9	-1.12165	2.05664e-05
1042	RASGRP2	ENSG00000068831	51.4833	-1.90873	2.05694e-05
1043	MT1E	ENSG00000169715	280.1	-1.25387	2.05694e-05
1044	LAMP1	ENSG00000185896	8185.15	-0.803045	2.09147e-05
1045	PLSCR3	ENSG00000187838	2122.94	-1.00035	2.09439e-05
1046	RPL31	ENSG00000071082	4187.72	-1.04173	2.1315e-05
1047	ZNF428	ENSG00000131116	697.196	-1.46942	2.1608e-05
1048	UCK2	ENSG00000143179	1158.73	-0.434363	2.16097e-05
1049	ATG2A	ENSG00000110046	487.818	-0.74132	2.1623e-05
1050	FHL3	ENSG00000183386	487.097	-1.24366	2.20603e-05
1051	MIR31HG	ENSG00000171889	21.1794	-1.56005	2.22831e-05
1052	IDH2	ENSG00000182054	590.023	-0.691381	2.23318e-05
1053	RPS7P1	ENSG00000263266	16.1027	-1.92563	2.26145e-05
1054	MAN2B2	ENSG00000013288	1839.16	-0.489792	2.28913e-05
1055	NDE1	ENSG00000072864	316.136	-0.576123	2.30788e-05
1056	―	ENSG00000236841	11.6031	-1.8286	2.31267e-05
1057	IL17RA	ENSG00000177663	607.083	-0.441568	2.32043e-05
1058	MEGF8	ENSG00000105429	1891.09	-0.981856	2.34663e-05
1059	LINC00680	ENSG00000290555	169.24	-0.771603	2.35314e-05
1060	TIMP1	ENSG00000102265	26948.4	-1.64905	2.394e-05
1061	RPS3AP6	ENSG00000234797	18.0914	-1.84887	2.40965e-05
1062	MMP19	ENSG00000123342	1690.87	-0.496719	2.42067e-05
1063	GALNT14	ENSG00000158089	90.5187	-0.928276	2.43329e-05
1064	OBSL1	ENSG00000124006	798.338	-0.927131	2.45793e-05
1065	PRRT3-AS1	ENSG00000230082	32.462	-1.95807	2.45793e-05
1066	IL6	ENSG00000136244	165.811	-1.58607	2.49866e-05
1067	POLR3H	ENSG00000100413	772.633	-0.730486	2.54853e-05
1068	UBE2D4	ENSG00000078967	268.252	-0.896634	2.58336e-05
1069	SEMA3B	ENSG00000012171	422.68	-1.10592	2.5973e-05
1070	FGF5	ENSG00000138675	130.322	-1.24857	2.62319e-05
1071	BRK1	ENSG00000254999	2337.59	-1.19023	2.62495e-05
1072	POLR2H	ENSG00000163882	474.788	-1.01159	2.6429e-05
1073	LINC01394	ENSG00000281809	21.5881	-1.71254	2.65816e-05
1074	BRPF1	ENSG00000156983	159.333	-0.694189	2.67529e-05
1075	CCN5	ENSG00000064205	24.1673	-1.55241	2.70533e-05
1076	HSPG2	ENSG00000142798	4635.79	-0.906975	2.75979e-05
1077	TNKS1BP1	ENSG00000149115	3087.58	-0.708316	2.76712e-05
1078	UQCC2	ENSG00000137288	702.428	-1.67494	2.77058e-05
1079	―	ENSG00000294583	5.31423	-3.57707	2.88292e-05
1080	RPS6	ENSG00000137154	13044.2	-0.976623	2.90451e-05
1081	MINDY1	ENSG00000143409	153.099	-0.682106	2.91209e-05
1082	ISY1	ENSG00000240682	254.812	-1.26576	2.91423e-05
1083	CORO7	ENSG00000262246	261.9	-1.06382	2.95883e-05
1084	MDC1	ENSG00000137337	347.826	-0.932454	2.97546e-05
1085	GTPBP2	ENSG00000172432	744.068	-0.693363	3.00338e-05
1086	MYLK-AS1	ENSG00000239523	76.8362	-1.4554	3.01114e-05
1087	RPS2	ENSG00000140988	25414.6	-1.09588	3.02866e-05
1088	NFATC1	ENSG00000131196	109.873	-0.732838	3.04185e-05
1089	TRAM2	ENSG00000065308	5290.85	-0.992775	3.051e-05
1090	SMIM29	ENSG00000186577	750.877	-1.02827	3.09676e-05
1091	TFAP2A-AS1	ENSG00000229950	25.0381	-1.44541	3.09676e-05
1092	―	ENSG00000307777	7.90984	-3.74935	3.14892e-05
1093	FOXL2NB	ENSG00000206262	245.345	-1.32192	3.1513e-05
1094	CASTOR1	ENSG00000239282	122.489	-1.05433	3.18446e-05
1095	PNPLA2	ENSG00000177666	1537.78	-1.0475	3.18625e-05
1096	LRFN3	ENSG00000126243	241.779	-1.11257	3.24131e-05
1097	―	ENSG00000300334	18.5591	-4.90709	3.25905e-05
1098	MLH1	ENSG00000076242	360.822	-0.527502	3.27569e-05
1099	RPS23	ENSG00000186468	4934.46	-1.0035	3.27569e-05
1100	FKBP4	ENSG00000004478	724.516	-0.418932	3.31749e-05
1101	SSR2	ENSG00000163479	5963.85	-1.22811	3.35843e-05
1102	EMID1	ENSG00000186998	24.0019	-1.63628	3.46701e-05
1103	NFYA	ENSG00000001167	280.198	-0.900891	3.48417e-05
1104	ERBB2	ENSG00000141736	1469.85	-0.64153	3.5449e-05
1105	BCL9	ENSG00000116128	172.176	-0.997703	3.5845e-05
1106	TMEM214	ENSG00000119777	2671.95	-0.750425	3.5845e-05
1107	S100A6	ENSG00000197956	23423.4	-1.34637	3.58568e-05
1108	JOSD1	ENSG00000100221	889.25	-0.426952	3.61094e-05
1109	COMT	ENSG00000093010	1846.68	-0.749617	3.62424e-05
1110	NHSL2	ENSG00000204131	123.462	-1.06952	3.69294e-05
1111	ARMC9	ENSG00000135931	1412.29	-0.410391	3.70528e-05
1112	LINC00881	ENSG00000241135	23.934	-1.33934	3.74103e-05
1113	LYRM2	ENSG00000083099	201.852	-0.725305	3.80917e-05
1114	ERCC1	ENSG00000012061	1294.82	-0.973329	3.81309e-05
1115	RTL8C	ENSG00000134590	6251.39	-1.04844	3.84316e-05
1116	MAGI1	ENSG00000151276	93.3338	-0.944329	3.88407e-05
1117	COL12A1	ENSG00000111799	6684.28	-1.37331	3.88927e-05
1118	ZMIZ1-AS1	ENSG00000224596	24.6436	-1.45133	3.89527e-05
1119	FOXE3	ENSG00000186790	12.0266	-3.34993	3.89959e-05
1120	FAM117A	ENSG00000121104	65.5118	-1.02875	3.91092e-05
1121	DUSP7	ENSG00000164086	948.613	-0.691365	3.93766e-05
1122	―	ENSG00000306225	6.04575	-4.32807	3.94912e-05
1123	―	ENSG00000268400	32.8039	-2.14025	4.0496e-05
1124	AGPAT3	ENSG00000160216	1512.63	-0.474084	4.06011e-05
1125	RPL27A	ENSG00000166441	9695.43	-1.31936	4.11973e-05
1126	PARVA	ENSG00000197702	3298.88	-0.379355	4.2324e-05
1127	MCOLN3	ENSG00000055732	30.6093	-1.34915	4.26109e-05
1128	SLC26A6	ENSG00000225697	627.915	-1.13187	4.32526e-05
1129	GNA11	ENSG00000088256	1536.88	-0.567203	4.33063e-05
1130	PTPN23	ENSG00000076201	991.559	-1.22631	4.38618e-05
1131	MAB21L1	ENSG00000180660	73.9434	-1.53435	4.45371e-05
1132	PSKH1	ENSG00000159792	698.373	-0.603404	4.59601e-05
1133	DGCR2	ENSG00000070413	1617.36	-0.557169	4.6709e-05
1134	SPARC	ENSG00000113140	40398.2	-0.420248	4.6736e-05
1135	RPL27	ENSG00000131469	5247.83	-1.03437	4.6736e-05
1136	ZNF35	ENSG00000169981	63.3828	-0.837033	4.69216e-05
1137	LOXL1	ENSG00000129038	3891.09	-1.01026	4.80139e-05
1138	TOMM7	ENSG00000196683	3377.55	-1.29723	4.83929e-05
1139	SYNGR2	ENSG00000108639	1172.06	-1.07154	4.86081e-05
1140	SLC2A1	ENSG00000117394	5011.19	-0.515147	4.93286e-05
1141	―	ENSG00000300007	17.4178	-1.72591	4.9492e-05
1142	RPS28P7	ENSG00000227097	539.176	-1.31467	5.16819e-05
1143	NCBP2	ENSG00000114503	774.484	-0.758197	5.19296e-05
1144	GMPPA	ENSG00000144591	1085.89	-1.14413	5.22297e-05
1145	PEX7	ENSG00000112357	73.1359	-0.971083	5.37462e-05
1146	DALRD3	ENSG00000178149	438.035	-1.3844	5.40619e-05
1147	ANKH	ENSG00000154122	807.272	-0.677477	5.44689e-05
1148	SHC1	ENSG00000160691	12564.1	-0.579839	5.54803e-05
1149	IL11	ENSG00000095752	57.5901	-1.36797	5.56244e-05
1150	PNKD	ENSG00000127838	994.045	-0.756475	5.56936e-05
1151	EMC1	ENSG00000127463	1584.87	-0.458474	5.70447e-05
1152	SDHAF4	ENSG00000154079	41.8322	-1.08704	5.73191e-05
1153	RPL34	ENSG00000109475	4127.54	-1.28645	5.78928e-05
1154	LY6G5C	ENSG00000204428	57.3184	-1.68513	5.79325e-05
1155	CTSB	ENSG00000164733	30841.5	-0.44396	5.86706e-05
1156	C1QTNF7	ENSG00000163145	13.9849	-2.32976	5.89467e-05
1157	FKBPL	ENSG00000204315	66.852	-1.27956	6.02715e-05
1158	ATP5MF	ENSG00000241468	1949.66	-1.13638	6.02715e-05
1159	DDB1	ENSG00000167986	4778	-0.586268	6.04739e-05
1160	FSTL1	ENSG00000163430	16335.4	-0.909532	6.05976e-05
1161	CNPY3	ENSG00000137161	637.296	-1.42247	6.12835e-05
1162	LENG8	ENSG00000167615	5296.58	-0.82963	6.13818e-05
1163	PKIG	ENSG00000168734	1796.05	-0.864898	6.15576e-05
1164	NTF3	ENSG00000185652	241.568	-0.607641	6.19776e-05
1165	LINC00973	ENSG00000240476	31.7284	-1.52703	6.26061e-05
1166	RAB11B	ENSG00000185236	1138.53	-0.877039	6.4457e-05
1167	LDHD	ENSG00000166816	12.9122	-2.05307	6.60303e-05
1168	AKT1S1	ENSG00000204673	2266.43	-1.16167	6.64111e-05
1169	PXN	ENSG00000089159	4526.47	-0.696682	6.74269e-05
1170	PVR	ENSG00000073008	1628.07	-0.59775	6.80196e-05
1171	SSTR3	ENSG00000278195	7.97667	-4.46095	6.80735e-05
1172	CHRM3	ENSG00000133019	6.84527	-4.86269	6.86657e-05
1173	ADAT2	ENSG00000189007	79.2091	-0.892068	6.87183e-05
1174	VPS37C	ENSG00000167987	474.722	-0.510572	6.88883e-05
1175	CREB5	ENSG00000146592	70.6658	-1.30115	6.90078e-05
1176	CUTA	ENSG00000112514	4708.66	-1.41279	6.92123e-05
1177	RPS3A	ENSG00000145425	9210.54	-0.964663	6.95382e-05
1178	TYK2	ENSG00000105397	1692.08	-0.625602	6.9679e-05
1179	TNS3	ENSG00000136205	2975.1	-1.03318	6.98515e-05
1180	CLSTN3	ENSG00000139182	611.993	-0.581278	6.98695e-05
1181	B4GALT7	ENSG00000027847	686.116	-1.22045	7.01629e-05
1182	HDAC2	ENSG00000196591	633.531	-0.742444	7.22214e-05
1183	―	ENSG00000196656	1587.97	-1.06638	7.23772e-05
1184	―	ENSG00000274565	109.45	-0.894482	7.2418e-05
1185	NR1H2	ENSG00000131408	663.056	-0.850944	7.34557e-05
1186	UBL4B	ENSG00000186150	187.838	-1.00596	7.36393e-05
1187	OGFOD3	ENSG00000181396	592.573	-1.0422	7.45181e-05
1188	TAF8	ENSG00000137413	162.791	-0.679795	7.45569e-05
1189	PLXNA3	ENSG00000130827	2105.67	-0.660695	7.50416e-05
1190	TGFBR3L	ENSG00000260001	132.578	-1.87225	7.66572e-05
1191	IFT20	ENSG00000109083	260.711	-0.731713	7.66642e-05
1192	NUTF2	ENSG00000102898	1944.17	-0.825214	7.8524e-05
1193	ERGIC1	ENSG00000113719	3947.25	-0.42602	8.05437e-05
1194	PPDPF	ENSG00000125534	3584.44	-1.29902	8.07416e-05
1195	U2AF2	ENSG00000063244	2097.16	-0.604835	8.10981e-05
1196	MMP9	ENSG00000100985	9.07819	-5.3235	8.13324e-05
1197	―	ENSG00000253174	25.6038	-1.85183	8.19718e-05
1198	―	ENSG00000287825	21.1816	-1.37864	8.36753e-05
1199	EEF1AKMT4	ENSG00000284753	53.6118	-1.7775	8.58053e-05
1200	PPP2R5D	ENSG00000112640	502.793	-0.789904	8.59997e-05
1201	GLYCTK	ENSG00000168237	94.2671	-1.79942	8.90203e-05
1202	OSCAR	ENSG00000170909	8.58185	-2.46007	8.91131e-05
1203	CASP9	ENSG00000132906	139.203	-0.745952	8.99337e-05
1204	DUBR	ENSG00000243701	166.682	-0.589098	9.01659e-05
1205	MRFAP1	ENSG00000179010	2817.28	-0.486205	9.05244e-05
1206	PARL	ENSG00000175193	388.388	-1.11503	9.06693e-05
1207	NHERF1	ENSG00000109062	268.422	-1.09215	9.17483e-05
1208	UBA7	ENSG00000182179	299.99	-0.804992	9.17837e-05
1209	MSX1	ENSG00000163132	14.1812	-1.8884	9.20933e-05
1210	PTGES	ENSG00000148344	222.888	-0.887833	9.22502e-05
1211	FADS3	ENSG00000221968	2444.07	-0.771239	9.32558e-05
1212	SNX17	ENSG00000115234	2112.43	-0.876152	9.41923e-05
1213	C3orf18	ENSG00000088543	325.499	-0.617806	9.54802e-05
1214	TAX1BP3	ENSG00000213977	3760.22	-0.889131	9.55068e-05
1215	DENND2D	ENSG00000162777	94.6394	-0.713917	9.74149e-05
1216	RPL29P26	ENSG00000241556	9.69116	-2.97823	9.76705e-05
1217	GDF5	ENSG00000125965	458.677	-0.835888	9.85854e-05
1218	RPL37	ENSG00000145592	5841.35	-1.09475	9.92782e-05
1219	GLB1L	ENSG00000163521	147.029	-0.72376	9.93311e-05
1220	PISD	ENSG00000241878	861.787	-0.602736	9.95101e-05
1221	SNHG16	ENSG00000163597	1330.98	-1.17244	9.96866e-05
1222	HSD17B8	ENSG00000204228	42.3139	-1.37135	9.97545e-05
1223	AKT2	ENSG00000105221	1799.65	-0.657817	0.000102051
1224	TM7SF2	ENSG00000149809	880.152	-1.17228	0.000102725
1225	ALDH1B1	ENSG00000137124	320.56	-0.593222	0.000102978
1226	CASTOR2	ENSG00000274070	278.924	-1.55674	0.000104195
1227	TSNARE1	ENSG00000171045	47.7477	-0.827292	0.00010518
1228	ING4	ENSG00000111653	251.935	-1.02525	0.000105229
1229	CENPW	ENSG00000203760	70.7408	-1.16224	0.000105441
1230	UBR2	ENSG00000024048	364.369	-0.770815	0.000106743
1231	PHF23	ENSG00000040633	1006.39	-0.640361	0.000106875
1232	FARS2	ENSG00000145982	171.8	-0.93201	0.000108148
1233	FTH1P23	ENSG00000242960	23.5118	-1.64421	0.000110032
1234	TOX4	ENSG00000092203	1193.75	-0.36551	0.000110209
1235	TMEM154	ENSG00000170006	98.4648	-1.26164	0.000110236
1236	LSM2	ENSG00000204392	526.05	-1.08317	0.000111503
1237	SHISA5	ENSG00000164054	5120.59	-0.880058	0.000112338
1238	ULBP2	ENSG00000131015	35.4324	-1.24179	0.000112371
1239	TBCC	ENSG00000124659	144.472	-0.666349	0.000112534
1240	DHRS4	ENSG00000157326	318.02	-0.911926	0.000113231
1241	C2CD2	ENSG00000157617	667.928	-0.58045	0.000113652
1242	OSR2	ENSG00000164920	933.703	-0.550944	0.000114721
1243	RPL17P39	ENSG00000212664	49.0382	-1.10054	0.000116102
1244	DNAH1	ENSG00000114841	119.42	-0.707944	0.000116178
1245	RAB11B-AS1	ENSG00000269386	52.5373	-1.51879	0.000116867
1246	IL31RA	ENSG00000164509	49.3735	-1.31894	0.000117442
1247	NLRX1	ENSG00000160703	349.529	-0.783858	0.000120541
1248	RFT1	ENSG00000163933	258.757	-0.537953	0.000121108
1249	HEMK1	ENSG00000114735	407.585	-0.968862	0.000121396
1250	NPRL2	ENSG00000114388	207.095	-0.885347	0.000123788
1251	POLR2J2-UPK3BL1	ENSG00000267645	184.292	-2.43507	0.000124606
1252	RPL19	ENSG00000108298	8576.53	-1.14632	0.00012652
1253	PDLIM2	ENSG00000120913	955.682	-0.818672	0.000127765
1254	RPS11	ENSG00000142534	6539.42	-1.11456	0.000129284
1255	NOL7	ENSG00000225921	333.478	-0.746561	0.000129412
1256	CACFD1	ENSG00000160325	153.128	-1.14939	0.000130746
1257	GPSM1	ENSG00000160360	1362.47	-0.945028	0.000131999
1258	PPIB	ENSG00000166794	8811.31	-1.12703	0.000131999
1259	EEF1B2	ENSG00000114942	3954.12	-0.89058	0.000133023
1260	DMAC2	ENSG00000105341	512.088	-0.550851	0.0001337
1261	IHO1	ENSG00000173421	7.1338	-3.5733	0.000134338
1262	LARP6	ENSG00000166173	779.53	-0.667912	0.000135267
1263	NAB2	ENSG00000166886	1082.93	-0.574209	0.000135335
1264	SCN1B	ENSG00000105711	183.361	-0.963357	0.000135859
1265	RHOC	ENSG00000155366	10139.3	-1.25147	0.000137805
1266	DPH2	ENSG00000132768	273.782	-0.62682	0.000138314
1267	NME6	ENSG00000172113	146.483	-0.531858	0.000138917
1268	ZMYND10	ENSG00000004838	12.0607	-2.15205	0.000139735
1269	ILK	ENSG00000166333	4040.83	-0.739937	0.00013998
1270	MAF1	ENSG00000179632	1035.16	-1.03579	0.000140568
1271	WASF1	ENSG00000112290	144.289	-1.02833	0.000140685
1272	EXTL3	ENSG00000012232	1274.7	-0.627384	0.00014192
1273	ETHE1	ENSG00000105755	1246.4	-0.93116	0.000142211
1274	SYT15B	ENSG00000277758	19.633	-1.37383	0.00014363
1275	NDUFS2	ENSG00000158864	1253.03	-0.52979	0.000145003
1276	IFRD2	ENSG00000214706	528.086	-0.86336	0.000146295
1277	RPL12	ENSG00000197958	11702.5	-1.03004	0.000147404
1278	ARPC2	ENSG00000163466	5434.71	-0.492733	0.000148673
1279	―	ENSG00000271857	15.0905	-2.14725	0.000149482
1280	NACC1	ENSG00000160877	1723.04	-0.861264	0.000150349
1281	DMAC1	ENSG00000137038	521.132	-0.861089	0.00015366
1282	ADHFE1	ENSG00000147576	67.9723	-0.652093	0.000155208
1283	B3GALT6	ENSG00000176022	687.867	-1.25265	0.000157069
1284	DNTTIP1	ENSG00000101457	348.221	-0.755489	0.000157447
1285	MST1	ENSG00000173531	115.14	-1.34815	0.000157447
1286	SOX13	ENSG00000143842	272.896	-0.6349	0.000158714
1287	H6PD	ENSG00000049239	1621.77	-0.755155	0.000158855
1288	MRPL47	ENSG00000136522	276.443	-0.881745	0.000159655
1289	THOC5	ENSG00000100296	449.281	-0.896813	0.000160986
1290	TMEM220-AS1	ENSG00000263400	25.0625	-1.41077	0.000161703
1291	LARS2	ENSG00000011376	269	-0.709819	0.000163934
1292	RAB13	ENSG00000143545	2047.21	-0.899742	0.000163934
1293	GMEB1	ENSG00000162419	171.822	-0.50455	0.000164048
1294	SDHAP3	ENSG00000291079	124.999	-0.507265	0.00016465
1295	EDC3	ENSG00000179151	561.964	-0.633052	0.000165278
1296	LINC02977	ENSG00000259953	33.8469	-1.00889	0.000165329
1297	TNK2	ENSG00000061938	866.701	-1.01177	0.00016796
1298	NQO2	ENSG00000124588	247.982	-0.983753	0.000168244
1299	ACTRT3	ENSG00000184378	33.3784	-0.971087	0.000168392
1300	RHBDF2	ENSG00000129667	811.004	-0.705346	0.000170199
1301	―	ENSG00000278974	75.2828	-0.945874	0.000170425
1302	RPS3	ENSG00000149273	14812.7	-1.13536	0.000170706
1303	ATG3	ENSG00000144848	418.33	-0.478363	0.000171536
1304	SELENON	ENSG00000162430	3386.96	-0.721405	0.000171915
1305	CYP39A1	ENSG00000146233	15.7901	-1.72827	0.000173103
1306	DPP4-DT	ENSG00000230918	23.9965	-1.3399	0.000173747
1307	GRK5	ENSG00000198873	532.259	-0.400141	0.000173817
1308	HDGF	ENSG00000143321	4903.56	-0.64036	0.000175265
1309	RCN1P2	ENSG00000214455	41.8131	-1.44644	0.0001761
1310	―	ENSG00000263823	14.8632	-1.56895	0.00017967
1311	PSG5	ENSG00000204941	19.9024	-1.39713	0.000180028
1312	NDUFB5	ENSG00000136521	466.125	-0.684834	0.000181631
1313	EIF6	ENSG00000242372	3443.05	-1.14117	0.000181631
1314	CDC42EP1	ENSG00000128283	1526.67	-1.0383	0.000181776
1315	ARMCX6	ENSG00000198960	771.775	-0.603016	0.000182958
1316	RABL3	ENSG00000144840	160.627	-0.800804	0.000183322
1317	―	ENSG00000306197	1135.75	-1.08555	0.000183796
1318	PCOLCE	ENSG00000106333	7127.7	-1.14975	0.000185776
1319	TBC1D25	ENSG00000068354	253.046	-0.543128	0.000186132
1320	UCN2	ENSG00000145040	164.709	-1.18128	0.000186132
1321	FAIM	ENSG00000158234	85.054	-0.892353	0.000186132
1322	SPHK2	ENSG00000063176	320.815	-0.7453	0.000186443
1323	ZBTB24	ENSG00000112365	75.1067	-0.704878	0.000186675
1324	NDST2	ENSG00000166507	438.523	-0.564099	0.000188127
1325	HSPA1L	ENSG00000204390	24.9641	-1.12136	0.000188127
1326	TBC1D10A	ENSG00000099992	416.924	-0.738821	0.000189798
1327	EIF3I	ENSG00000084623	1937.25	-0.54824	0.000194176
1328	SLC39A13	ENSG00000165915	3178.67	-0.563693	0.000194374
1329	DYRK1B	ENSG00000105204	284.046	-1.06698	0.000194712
1330	PRMT1	ENSG00000126457	1527.7	-0.792617	0.000195176
1331	―	ENSG00000283149	110.566	-1.54362	0.000196507
1332	FAM182A	ENSG00000125804	35.5726	-0.985515	0.000196681
1333	PLPPR3	ENSG00000129951	7.58934	-2.45184	0.000196681
1334	BGN	ENSG00000182492	2417.37	-1.25907	0.000197601
1335	RPL18	ENSG00000063177	7280.25	-1.28595	0.000198845
1336	FTH1P8	ENSG00000219507	29.6756	-1.78529	0.000201785
1337	HLA-L	ENSG00000291097	57.5232	-0.898554	0.000202071
1338	GOLGA2	ENSG00000167110	1132.46	-0.333045	0.000202162
1339	IMPDH1	ENSG00000106348	1331.9	-1.21771	0.000202883
1340	HNRNPUL1	ENSG00000105323	2462.22	-0.586693	0.000202955
1341	METTL6	ENSG00000206562	160.224	-0.737928	0.000203743
1342	SNHG9	ENSG00000255198	147.091	-1.61151	0.00020412
1343	ITGA9-AS1	ENSG00000235257	44.7428	-0.850838	0.000204201
1344	―	ENSG00000230074	60.9063	-0.735726	0.000207539
1345	RPS2P55	ENSG00000216866	52.9403	-1.49102	0.000208022
1346	RPL4P5	ENSG00000230207	55.1585	-1.71851	0.000208525
1347	BYSL	ENSG00000112578	294.165	-0.679516	0.00020935
1348	PRELID1	ENSG00000169230	1486.43	-0.876151	0.000210009
1349	NXPH4	ENSG00000182379	32.8278	-1.60497	0.000211667
1350	RPS28	ENSG00000233927	4641.96	-1.62383	0.000214494
1351	MMP25-AS1	ENSG00000261971	132.664	-0.967658	0.00021493
1352	WDR77	ENSG00000116455	725.756	-0.598172	0.000216363
1353	―	ENSG00000206567	73.3623	-0.893204	0.000219289
1354	ST20-AS1	ENSG00000259642	43.3825	-0.920967	0.00021929
1355	ANGPTL2	ENSG00000136859	893.691	-0.579421	0.00022207
1356	PFKFB4	ENSG00000114268	388.828	-0.878653	0.000223111
1357	PLIN3	ENSG00000105355	3020.72	-0.570444	0.000225566
1358	QSOX1	ENSG00000116260	9159.94	-0.829359	0.000226776
1359	HCG18	ENSG00000231074	215.346	-0.630958	0.000228549
1360	SH3PXD2A	ENSG00000107957	2886.84	-0.702288	0.000228565
1361	HYKK	ENSG00000188266	13.9319	-1.51085	0.000229254
1362	SLC17A5	ENSG00000119899	521.413	-0.936523	0.000230296
1363	SUPT5H	ENSG00000196235	1981.17	-0.787287	0.000235762
1364	SELENOH	ENSG00000211450	874.657	-1.06354	0.000240481
1365	―	ENSG00000289252	21.4861	-1.56017	0.000243162
1366	GTF2IP1	ENSG00000290871	1450.69	-0.622364	0.000243461
1367	RPL11	ENSG00000142676	7989.12	-1.07289	0.000246085
1368	KLHL18	ENSG00000114648	258.337	-0.752375	0.000248752
1369	CCDC57	ENSG00000176155	361.767	-1.0351	0.000249441
1370	MYH9	ENSG00000100345	17519.6	-0.673467	0.000250869
1371	GABARAPL1	ENSG00000139112	1764.46	-0.459695	0.000252297
1372	ACAD8	ENSG00000151498	240.378	-0.484014	0.000252495
1373	PCGF1	ENSG00000115289	113.362	-0.769184	0.000258297
1374	PSMD8	ENSG00000099341	2796.59	-0.766909	0.000260005
1375	FBLN5	ENSG00000140092	5409.13	-0.41253	0.000263045
1376	RPS2P7	ENSG00000235508	19.5217	-2.22777	0.000263056
1377	TMEM234	ENSG00000160055	295.398	-1.03285	0.000263093
1378	CHST12	ENSG00000136213	358.001	-0.903315	0.000265196
1379	MIPEP	ENSG00000027001	263.097	-0.546595	0.000265317
1380	EZR	ENSG00000092820	832.055	-0.949043	0.000265664
1381	SIX5	ENSG00000177045	286.984	-0.989705	0.000266137
1382	SAT2	ENSG00000141504	728.371	-1.10317	0.000267966
1383	―	ENSG00000261816	6.56014	-3.89923	0.00026914
1384	PIK3R2	ENSG00000105647	1554.13	-0.800064	0.000271852
1385	EIF3D	ENSG00000100353	2524.31	-0.602601	0.000273955
1386	IGSF10	ENSG00000152580	7.05857	-3.19336	0.000274067
1387	EHMT2	ENSG00000204371	716.596	-0.994583	0.000274185
1388	HLA-H	ENSG00000310469	164.246	-1.18574	0.000274904
1389	KLF16	ENSG00000129911	653.165	-1.1229	0.000276434
1390	PER1	ENSG00000179094	674.387	-0.777388	0.000276434
1391	KCTD15	ENSG00000153885	150.071	-0.527789	0.00027766
1392	CHD3	ENSG00000170004	2194.94	-0.979245	0.000278634
1393	ADSL	ENSG00000239900	764.997	-0.499336	0.0002819
1394	BCAM	ENSG00000187244	87.7667	-1.20131	0.00028296
1395	MECOM	ENSG00000085276	20.2104	-1.74317	0.000288541
1396	GPANK1	ENSG00000204438	206.373	-0.966231	0.00028862
1397	MRPL2	ENSG00000112651	341.493	-1.13319	0.000289859
1398	BCKDK	ENSG00000103507	796.247	-0.826091	0.000291444
1399	SLC43A1	ENSG00000149150	208.919	-1.3528	0.000292368
1400	BBLN	ENSG00000171159	983.944	-1.33714	0.000292368
1401	NME4	ENSG00000103202	2886.31	-0.964287	0.000296699
1402	HEBP2	ENSG00000051620	496.262	-0.774053	0.000296815
1403	TTC3	ENSG00000182670	2924.28	-0.62057	0.000299954
1404	NECTIN2	ENSG00000130202	1849.5	-1.10721	0.000300832
1405	SEMA4B	ENSG00000185033	146.911	-0.856657	0.000301285
1406	STK19	ENSG00000204344	363.8	-1.32774	0.000305519
1407	SERP1	ENSG00000120742	1390.26	-0.740886	0.000308195
1408	OAZ1	ENSG00000104904	8947.69	-0.959754	0.000313929
1409	MAGED2	ENSG00000102316	2845.84	-0.739277	0.000314645
1410	GTF3C1	ENSG00000077235	1689.54	-0.664741	0.000314762
1411	ABTB1	ENSG00000114626	405.96	-1.59743	0.000317014
1412	TMEM258	ENSG00000134825	1039.86	-0.967624	0.000322832
1413	LINC00941	ENSG00000285517	45.4832	-0.894129	0.000326603
1414	RPL28	ENSG00000108107	8637.13	-1.17155	0.000328065
1415	BAK1	ENSG00000030110	605.14	-1.26141	0.000328092
1416	PFN1	ENSG00000108518	14862.3	-1.03762	0.000331254
1417	TMEM98	ENSG00000006042	2486.98	-0.430727	0.000332107
1418	LTBR	ENSG00000111321	1905.78	-0.595928	0.000335164
1419	LNP1	ENSG00000206535	15.4134	-1.37447	0.000338529
1420	WDR46	ENSG00000227057	763.499	-1.33799	0.000340135
1421	SLC25A27	ENSG00000153291	70.875	-1.00092	0.000340292
1422	UBA1	ENSG00000130985	6268.6	-0.649388	0.000340466
1423	ABHD17A	ENSG00000129968	1764.79	-0.774004	0.000342213
1424	SETMAR	ENSG00000170364	78.0608	-0.971192	0.000342213
1425	NID1	ENSG00000116962	1691.24	-1.03795	0.000343342
1426	NUDT16L1	ENSG00000168101	510.993	-1.00364	0.000343342
1427	CLSTN1	ENSG00000171603	2932.91	-0.452197	0.000343779
1428	UBE2J1	ENSG00000198833	525.409	-0.801833	0.000345594
1429	FAM13A-AS1	ENSG00000248019	63.4498	-0.794052	0.000349031
1430	SPON2	ENSG00000159674	5153.86	-1.07613	0.000349878
1431	P4HB	ENSG00000185624	26785.4	-0.757027	0.000352345
1432	EPS8L1	ENSG00000131037	50.1716	-1.45636	0.0003525
1433	PTGR1	ENSG00000106853	976.303	-0.477441	0.000359802
1434	VSTM5	ENSG00000214376	21.8983	-1.23182	0.000363237
1435	MED20	ENSG00000124641	256.451	-0.690016	0.000364528
1436	EEF1A1P16	ENSG00000213235	5.55697	-2.70919	0.000364528
1437	CEACAM19	ENSG00000186567	154.354	-0.926995	0.000365051
1438	ANKS1A	ENSG00000064999	213.155	-0.914752	0.000365345
1439	ZNF385D	ENSG00000151789	9.22995	-1.84612	0.000367009
1440	FBXO10	ENSG00000147912	228.203	-0.674804	0.00036993
1441	ATP5PO	ENSG00000241837	1595.98	-0.832341	0.00037482
1442	SLC25A26	ENSG00000144741	249.737	-1.09769	0.000375422
1443	NAPA	ENSG00000105402	1587.83	-0.857499	0.000377232
1444	ZDHHC16	ENSG00000171307	801.897	-0.599337	0.000379327
1445	SH3GL1	ENSG00000141985	1931.48	-0.865141	0.00038283
1446	TBP	ENSG00000112592	99.679	-0.635369	0.000382974
1447	PSG1	ENSG00000231924	9.73657	-2.12736	0.000383469
1448	TEX29	ENSG00000153495	17.5223	-1.80456	0.000384038
1449	RPL36AP37	ENSG00000244398	1503.21	-1.14674	0.00038466
1450	CFAP44	ENSG00000206530	31.0984	-1.03686	0.000384699
1451	PPP2R1B	ENSG00000137713	588.014	-0.643158	0.000385105
1452	HTR2B	ENSG00000135914	22.4271	-1.33209	0.000393228
1453	YWHAE	ENSG00000108953	5298.18	-0.367018	0.000399381
1454	BOK	ENSG00000176720	479.941	-0.921631	0.000401965
1455	XYLB	ENSG00000093217	46.8213	-1.00029	0.000402708
1456	TRAF7	ENSG00000131653	1426.53	-0.634525	0.000403703
1457	ICAM4-AS1	ENSG00000267607	24.1692	-2.31808	0.000404125
1458	ARF5	ENSG00000004059	1386.69	-1.2397	0.000404264
1459	SPRYD3	ENSG00000167778	1115.8	-0.73957	0.000410231
1460	RNF8	ENSG00000112130	190.157	-0.600478	0.000411438
1461	TRIM39	ENSG00000204599	186.736	-0.553867	0.000420369
1462	RPLP1	ENSG00000137818	13069.5	-0.942044	0.000422545
1463	OPTN	ENSG00000123240	2205.65	-0.632087	0.00042266
1464	ATF5	ENSG00000169136	1317.17	-1.06734	0.000432719
1465	TOR2A	ENSG00000160404	190.711	-0.869759	0.000438772
1466	HOMEZ	ENSG00000290292	179.956	-0.604742	0.000439261
1467	RFXANK	ENSG00000064490	582.161	-1.25566	0.000444135
1468	CD151	ENSG00000177697	8640.98	-1.07275	0.000445523
1469	MAGEF1	ENSG00000177383	241.134	-0.748618	0.000446327
1470	MAPKAPK2	ENSG00000162889	1855.76	-0.659106	0.000447577
1471	USP11	ENSG00000102226	1531.87	-0.608215	0.000448557
1472	―	ENSG00000294020	46.6652	-1.87055	0.000448557
1473	―	ENSG00000280334	11.1337	-1.9271	0.000448642
1474	FMNL1	ENSG00000184922	69.3613	-0.738205	0.000457305
1475	BEST1	ENSG00000167995	87.4592	-0.608075	0.000457718
1476	HOXC4	ENSG00000198353	84.4221	-0.796488	0.000457718
1477	HSPB3	ENSG00000169271	93.3356	-0.861722	0.000464768
1478	―	ENSG00000289009	15.2649	-1.20845	0.00046705
1479	PHF10	ENSG00000130024	233.897	-0.770141	0.000467791
1480	IRF2BP1	ENSG00000170604	346.983	-0.868436	0.000469603
1481	SPATC1L	ENSG00000160284	260.207	-1.19612	0.000471874
1482	PRRT1	ENSG00000204314	77.0809	-1.16705	0.000474308
1483	SPTAN1	ENSG00000197694	4490.11	-0.675398	0.000477972
1484	PFDN1	ENSG00000113068	728.773	-0.507466	0.000478556
1485	LINC01278	ENSG00000235437	334.248	-0.660087	0.000480275
1486	SELPLG	ENSG00000110876	315.583	-1.14311	0.000483235
1487	―	ENSG00000284969	154.885	-2.54608	0.000484039
1488	EIF3C	ENSG00000184110	5717.25	-0.611622	0.000487015
1489	EFEMP2	ENSG00000172638	9167.61	-0.950428	0.000487418
1490	GPR39	ENSG00000183840	158.379	-0.59134	0.000489259
1491	USF2	ENSG00000105698	813.833	-0.851444	0.000493049
1492	―	ENSG00000293098	14.7959	-1.35128	0.000495493
1493	NUMBL	ENSG00000105245	850.218	-0.497085	0.000498931
1494	RPS13	ENSG00000110700	4804.72	-0.815328	0.000500983
1495	SPOCD1	ENSG00000134668	1356.32	-0.877727	0.000501059
1496	ARFIP2	ENSG00000132254	688.764	-0.632799	0.000505822
1497	ERI3	ENSG00000117419	828.667	-0.959738	0.000506255
1498	CCDC92	ENSG00000119242	940.741	-0.971757	0.000507519
1499	TOMM40L	ENSG00000158882	246.105	-0.552847	0.000508456
1500	PCDHB5	ENSG00000113209	8.71048	-2.15456	0.000508825
1501	PTPRS	ENSG00000105426	1018.72	-0.997243	0.000509841
1502	GBA1	ENSG00000177628	2129.62	-0.598221	0.000515156
1503	HLA-E	ENSG00000204592	6113.71	-0.541922	0.000521258
1504	FKBP8	ENSG00000105701	5219.58	-1.21257	0.000525324
1505	RPS10-NUDT3	ENSG00000270800	204.871	-1.41218	0.000527707
1506	C1orf53	ENSG00000203724	34.9354	-1.30436	0.000542895
1507	UBE2V1	ENSG00000244687	1331.76	-0.444449	0.000545194
1508	PROB1	ENSG00000228672	159.026	-1.07289	0.000552022
1509	BABAM2	ENSG00000158019	551.286	-0.50532	0.000556566
1510	PLD3	ENSG00000105223	7845.73	-0.847768	0.00056587
1511	RPL13A	ENSG00000142541	22901.3	-1.03743	0.000567131
1512	CMTR1	ENSG00000137200	736.533	-0.478846	0.000568177
1513	GUCA1A	ENSG00000048545	8.6764	-6.11374	0.000572468
1514	CCDC106	ENSG00000173581	319.97	-1.09426	0.000584804
1515	―	ENSG00000261582	13.3198	-2.25656	0.000590036
1516	KCNMB4	ENSG00000135643	142.719	-0.719213	0.000591779
1517	―	ENSG00000288903	15.4472	-1.41901	0.000592827
1518	WDR13	ENSG00000101940	813.936	-0.996233	0.000601191
1519	―	ENSG00000308772	7.02154	-5.51361	0.000607591
1520	PPP2R1A	ENSG00000105568	4782.48	-0.766885	0.000607919
1521	―	ENSG00000285130	16.7745	-2.43825	0.00060954
1522	MRPS24	ENSG00000062582	1308.93	-1.02316	0.000609603
1523	APBA3	ENSG00000011132	272.962	-0.652734	0.000613838
1524	SHISA4	ENSG00000198892	1084.54	-0.725651	0.000615926
1525	RPS27	ENSG00000177954	7616.07	-0.938137	0.000625128
1526	DAZAP1	ENSG00000071626	1541.62	-0.693071	0.00062548
1527	SH3BP5L	ENSG00000175137	491.578	-0.606306	0.000627614
1528	―	ENSG00000302163	287.62	-2.44403	0.000632438
1529	FOSB	ENSG00000125740	2204.08	-1.43501	0.000632453
1530	PPP4C	ENSG00000149923	2127.76	-1.00197	0.000641923
1531	MBOAT1	ENSG00000172197	88.9225	-0.715811	0.000644598
1532	―	ENSG00000277476	134.126	-1.02344	0.000650883
1533	ST7	ENSG00000004866	337.656	-0.459007	0.000654839
1534	RPS26	ENSG00000197728	4037.53	-1.24758	0.000656497
1535	RPL38	ENSG00000172809	2089.11	-1.08439	0.000658922
1536	SHC2	ENSG00000129946	119.877	-1.40727	0.000671242
1537	SNRK-AS1	ENSG00000234617	16.5212	-1.40849	0.000671242
1538	GMPS	ENSG00000163655	659.231	-0.436675	0.000675354
1539	CDK16	ENSG00000102225	1821.75	-0.746762	0.000675796
1540	SLC38A10	ENSG00000157637	2632.6	-0.638652	0.000679367
1541	FAM234B	ENSG00000084444	137.311	-0.584032	0.000681421
1542	TNFRSF21	ENSG00000146072	454.555	-0.717703	0.000681421
1543	ARF1	ENSG00000143761	5541.2	-0.408784	0.000682908
1544	IL1B	ENSG00000125538	6.53397	-2.98983	0.000684763
1545	RPS27A	ENSG00000143947	11627.8	-1.16619	0.000685272
1546	PIK3CD	ENSG00000171608	469.673	-0.631443	0.000685272
1547	APOM	ENSG00000204444	15.0566	-1.53925	0.00068957
1548	STARD5	ENSG00000172345	167.861	-0.714343	0.000693338
1549	PNISR	ENSG00000132424	439.641	-0.821777	0.000693535
1550	PBXIP1	ENSG00000163346	1506.73	-1.11814	0.000695324
1551	―	ENSG00000283041	61.2809	-1.27019	0.000695324
1552	―	ENSG00000306073	12.573	-1.47872	0.00069649
1553	CD63	ENSG00000135404	35581.8	-1.06798	0.000698315
1554	DHRS11	ENSG00000278535	141.064	-0.80585	0.000699439
1555	ZBTB12	ENSG00000204366	39.5304	-1.33194	0.000706113
1556	SEC22A	ENSG00000121542	201.516	-0.719725	0.000708446
1557	PPP1CA	ENSG00000172531	2324.75	-0.867455	0.000709257
1558	ACP2	ENSG00000134575	757.087	-0.68786	0.000715953
1559	XYLT2	ENSG00000015532	908.775	-0.769244	0.00071799
1560	ENO1	ENSG00000074800	15001.5	-0.586789	0.000718661
1561	CHCHD4	ENSG00000163528	98.3882	-0.772666	0.00072927
1562	SSBP4	ENSG00000130511	955.467	-0.953521	0.000730385
1563	ITPK1	ENSG00000100605	514.413	-0.718725	0.00073076
1564	SPSB1	ENSG00000171621	384.423	-0.390861	0.000735068
1565	ATG9A	ENSG00000198925	1234.74	-0.630255	0.000742567
1566	RAB40C	ENSG00000197562	299.557	-0.849569	0.000748599
1567	GABARAP	ENSG00000170296	5265.05	-1.20832	0.00075038
1568	RRP9	ENSG00000114767	305.735	-1.00892	0.000750707
1569	―	ENSG00000298766	283.418	-2.44895	0.000756202
1570	C4B	ENSG00000224389	39.7132	-1.47228	0.000761153
1571	RPL41	ENSG00000229117	17877.9	-1.04845	0.000770354
1572	ARPC1A	ENSG00000241685	1460.25	-0.434609	0.000770354
1573	MRPL51	ENSG00000111639	1443.08	-0.728292	0.000783541
1574	TGFB1I1	ENSG00000140682	2052.16	-1.0337	0.000783649
1575	PRKAR2A	ENSG00000114302	456.151	-0.927688	0.000789826
1576	SRSF6	ENSG00000124193	1766.02	-0.384752	0.000793273
1577	MINK1	ENSG00000141503	1532.78	-0.508452	0.000798795
1578	RPL22	ENSG00000116251	3321.77	-0.673788	0.00081172
1579	AFG1L	ENSG00000135537	36.4942	-0.798457	0.000813863
1580	ZCCHC24	ENSG00000165424	1533.31	-0.441446	0.000817245
1581	CMKLR1	ENSG00000174600	1042.18	-0.991999	0.000823562
1582	―	ENSG00000270953	6.02764	-2.50301	0.000826749
1583	NR2F1	ENSG00000175745	390.032	-0.815199	0.000833968
1584	HVCN1	ENSG00000122986	87.0474	-0.54412	0.000839093
1585	POLR2E	ENSG00000099817	2673.74	-1.04215	0.000847518
1586	CHRAC1	ENSG00000104472	300.528	-0.605769	0.000847518
1587	B3GALT4	ENSG00000235863	89.9247	-1.06534	0.000847518
1588	CCT3	ENSG00000163468	2756.56	-0.491246	0.000851703
1589	TMEM217B	ENSG00000286105	11.104	-2.34906	0.000857214
1590	PACS1	ENSG00000175115	1531.62	-1.01535	0.00087052
1591	―	ENSG00000229116	4.52367	-2.77247	0.000875884
1592	SELENOW	ENSG00000178980	4418.5	-1.38352	0.000884299
1593	RPL13P12	ENSG00000215030	174.868	-1.43455	0.000891894
1594	BCAS3	ENSG00000141376	237.776	-0.678883	0.000902892
1595	ANKRD65	ENSG00000235098	11.9833	-2.23661	0.000917759
1596	RPS17	ENSG00000182774	9234.94	-1.17199	0.0009287
1597	RNF141	ENSG00000110315	444.8	-0.485443	0.000936344
1598	―	ENSG00000286177	26.5731	-1.44842	0.000938051
1599	HLX	ENSG00000136630	513.909	-0.934202	0.000939656
1600	ATXN10	ENSG00000130638	2131.9	-0.54121	0.000940505
1601	RPS25	ENSG00000118181	3576.34	-0.918889	0.000940577
1602	GATAD2A	ENSG00000167491	832.685	-0.433019	0.000942267
1603	―	ENSG00000293679	3.70579	-5.30176	0.000942267
1604	ITGB2-AS1	ENSG00000227039	4.02139	-2.9105	0.000943845
1605	HLA-DPB1	ENSG00000223865	141.366	-1.19547	0.000945665
1606	NRROS	ENSG00000174004	10.649	-1.66033	0.000948545
1607	―	ENSG00000295152	21.8448	-1.42446	0.000948746
1608	ANGEL1	ENSG00000013523	540.924	-0.530995	0.000956232
1609	OARD1	ENSG00000124596	133.542	-0.714014	0.000964887
1610	GLG1	ENSG00000090863	3659.36	-0.362979	0.000973417
1611	B4GALT3	ENSG00000158850	461.504	-0.774488	0.000973914
1612	IDH3G	ENSG00000067829	879.909	-0.9163	0.000987417
1613	ZFPL1	ENSG00000162300	572.942	-0.903902	0.000989735
1614	UBTD1	ENSG00000165886	577.462	-1.00974	0.00100002
1615	TMED3	ENSG00000166557	2352.54	-0.908746	0.0010045
1616	CD44	ENSG00000026508	17196.5	-0.583462	0.00101884
1617	HSPA5	ENSG00000044574	11227.7	-0.392838	0.00101988
1618	CFL1	ENSG00000172757	20056	-0.723103	0.00102146
1619	MEX3D	ENSG00000181588	323.727	-0.450354	0.00103137
1620	DGAT1	ENSG00000185000	422.28	-0.827834	0.00103626
1621	RBM19	ENSG00000122965	391.935	-0.542679	0.00104674
1622	FASN	ENSG00000169710	6288.95	-0.704307	0.00104935
1623	B4GALT2	ENSG00000117411	1769.2	-0.916922	0.00105509
1624	PTCH2	ENSG00000117425	123.004	-0.722151	0.00105509
1625	RPS16	ENSG00000105193	6717.61	-0.952706	0.00105712
1626	NCKIPSD	ENSG00000213672	318.196	-0.921572	0.0010656
1627	SPRYD4	ENSG00000176422	208.027	-0.530033	0.00106765
1628	ZNF589	ENSG00000164048	94.4063	-0.870499	0.00107256
1629	SIRPA	ENSG00000198053	524.334	-0.447574	0.0010772
1630	DELE1	ENSG00000081791	674.43	-0.393054	0.00108049
1631	RAD54L2	ENSG00000164080	399.904	-0.836686	0.00108302
1632	SFT2D1	ENSG00000198818	377.884	-0.696136	0.00108442
1633	LMAN2L	ENSG00000114988	468.919	-0.442454	0.0010866
1634	MAN1B1	ENSG00000177239	3199.34	-1.18105	0.00108811
1635	GMPR2	ENSG00000100938	724.383	-0.33672	0.00108846
1636	GK	ENSG00000198814	122.356	-0.980059	0.00109188
1637	SELENOK	ENSG00000113811	239.124	-0.693177	0.00109831
1638	GFUS	ENSG00000104522	809.843	-0.922644	0.00110117
1639	ABHD8	ENSG00000127220	144.733	-1.18438	0.0011051
1640	ZBTB11-AS1	ENSG00000256628	42.2695	-0.905211	0.00110537
1641	TMEM14A	ENSG00000096092	194.138	-0.566618	0.00110605
1642	PRDX6	ENSG00000117592	11629.3	-0.562877	0.00110605
1643	SLC38A7	ENSG00000103042	749.061	-0.701312	0.00111238
1644	BCAR1	ENSG00000050820	2364.4	-0.439318	0.00111314
1645	SEMA4C	ENSG00000168758	320.19	-0.623169	0.00112768
1646	GLIS1	ENSG00000174332	371.484	-0.920896	0.00113366
1647	EXOC6	ENSG00000138190	94.6242	-0.876402	0.00113584
1648	HSD11B1L	ENSG00000167733	175.514	-1.01946	0.00114147
1649	ZGPAT	ENSG00000197114	296.728	-0.769145	0.00114981
1650	FAAP100	ENSG00000185504	551.294	-0.960845	0.00115512
1651	PPL	ENSG00000118898	101.094	-0.81623	0.00115521
1652	METTL26	ENSG00000130731	480.27	-1.18781	0.00115558
1653	MAP3K13	ENSG00000073803	107.481	-0.768129	0.00115629
1654	RPS15	ENSG00000115268	3113.66	-1.1564	0.00116974
1655	RPL21	ENSG00000122026	3369.11	-0.998621	0.00117024
1656	RWDD2B	ENSG00000156253	328.943	-0.59424	0.0011719
1657	MCRS1	ENSG00000187778	615.158	-0.807323	0.00117207
1658	GPSM3	ENSG00000213654	147.741	-0.903329	0.00117544
1659	NRP1	ENSG00000099250	1861.34	-1.12562	0.00118185
1660	FOXD2-AS1	ENSG00000237424	44.4846	-1.20934	0.00118503
1661	SMIM1	ENSG00000235169	7.08683	-2.26107	0.0011913
1662	HMG20B	ENSG00000064961	1259.07	-0.935211	0.00119186
1663	GRK6	ENSG00000198055	312.075	-0.75112	0.00119186
1664	TBC1D17	ENSG00000104946	1055.12	-0.962844	0.00119288
1665	CCDC24	ENSG00000159214	191.358	-0.878431	0.00119533
1666	PLA2G4C	ENSG00000105499	268.592	-0.618604	0.00119845
1667	CANT1	ENSG00000171302	1384.47	-0.59596	0.00120336
1668	CPNE1	ENSG00000214078	1876.11	-0.720438	0.00120625
1669	CTNS	ENSG00000040531	504.61	-0.588033	0.00120707
1670	ZNF580	ENSG00000213015	678.004	-1.33328	0.00121417
1671	MMP14	ENSG00000157227	11684.3	-0.519748	0.00121684
1672	RPL9	ENSG00000163682	374.209	-0.569144	0.00122628
1673	―	ENSG00000304732	9.41546	-1.64101	0.00122777
1674	LINC00963	ENSG00000204054	295.664	-0.657311	0.00123541
1675	DCAF6	ENSG00000143164	668.666	-0.481732	0.00124555
1676	RASA4	ENSG00000105808	77.4615	-0.754561	0.00124626
1677	C15orf48	ENSG00000166920	20.647	-1.30406	0.00124626
1678	PDIA3	ENSG00000167004	9088.89	-0.376354	0.00126269
1679	BTBD19	ENSG00000222009	455.684	-0.492505	0.00126367
1680	MLF2	ENSG00000089693	4417.69	-0.814976	0.00127149
1681	RAB34	ENSG00000109113	2690.42	-0.864603	0.0012776
1682	AKAP12	ENSG00000131016	707.848	-1.1822	0.00128505
1683	MELTF-AS1	ENSG00000228109	48.942	-1.41824	0.00128746
1684	FKBP9	ENSG00000122642	3384.08	-0.489497	0.00129094
1685	RHBDL2	ENSG00000158315	10.2933	-1.49694	0.0012922
1686	ANPEP	ENSG00000166825	30122.8	-0.623932	0.00129442
1687	SH3BGRL3	ENSG00000142669	9076.55	-1.15534	0.00129965
1688	BANP	ENSG00000172530	167.263	-0.811796	0.00130759
1689	PRSS35	ENSG00000146250	14.28	-1.9563	0.00132713
1690	RPL7	ENSG00000147604	8420.88	-0.884915	0.00132721
1691	YPEL4	ENSG00000166793	22.891	-1.00023	0.00132775
1692	―	ENSG00000290927	56.9373	-1.13371	0.00132812
1693	PMM2	ENSG00000140650	804.914	-0.663015	0.00134149
1694	GRN	ENSG00000030582	8660.26	-0.815675	0.00134705
1695	NAA60	ENSG00000122390	712.525	-0.627439	0.00134956
1696	EPHA1	ENSG00000146904	41.8968	-1.67797	0.00135077
1697	TRAPPC5	ENSG00000181029	621.228	-1.19588	0.00135665
1698	OR2A1-AS1	ENSG00000244479	114.65	-1.31123	0.00135925
1699	FBXL22	ENSG00000197361	7.52583	-3.0566	0.00136251
1700	―	ENSG00000290827	3.91234	-2.65876	0.00136717
1701	ECSIT	ENSG00000130159	273.173	-1.19271	0.00139466
1702	S100A13	ENSG00000189171	1936.37	-1.50986	0.00139893
1703	AHCY	ENSG00000101444	1861.06	-0.479	0.00140113
1704	GGN	ENSG00000179168	25.425	-1.37989	0.00140113
1705	DPP3	ENSG00000254986	766.159	-0.484741	0.00140113
1706	RWDD2A	ENSG00000013392	112.908	-0.682719	0.0014036
1707	TMEM120B	ENSG00000188735	660.073	-0.546243	0.00141422
1708	―	ENSG00000290858	278.997	-1.50737	0.00142022
1709	AGFG2	ENSG00000106351	137.199	-0.985706	0.00142386
1710	VILL	ENSG00000136059	86.7262	-0.902534	0.00142714
1711	CCN2	ENSG00000118523	5067.52	-0.678672	0.00143148
1712	EIF5A	ENSG00000132507	5947.27	-0.866665	0.0014424
1713	LSR	ENSG00000105699	50.594	-1.23251	0.00145981
1714	SEMA3F-AS1	ENSG00000235016	43.0373	-0.932212	0.00146147
1715	CBY1	ENSG00000100211	440.644	-0.727411	0.0014692
1716	MAD2L1BP	ENSG00000124688	291.897	-0.525063	0.0014692
1717	STX1A	ENSG00000106089	175.768	-0.791106	0.00149712
1718	MRPL3	ENSG00000114686	426.882	-0.594002	0.00150174
1719	ZER1	ENSG00000160445	938.506	-0.737096	0.00150403
1720	―	ENSG00000274766	21.9318	-1.08788	0.00150403
1721	STK25	ENSG00000115694	1420.62	-0.578359	0.00150823
1722	MRPS22	ENSG00000175110	317.812	-0.563795	0.00150977
1723	COPS7A	ENSG00000111652	1871.29	-0.429196	0.00151343
1724	NUDT11	ENSG00000196368	64.0373	-0.908368	0.00152443
1725	BOLA2	ENSG00000183336	159.153	-1.5995	0.00153226
1726	CNTNAP1	ENSG00000108797	1741.2	-0.618141	0.00153255
1727	METTL22	ENSG00000067365	297.612	-0.681483	0.00155327
1728	HSP90B1	ENSG00000166598	14883.1	-0.465304	0.00156883
1729	EIF4A3	ENSG00000141543	912.985	-0.436564	0.00157642
1730	CLCN7	ENSG00000103249	1467.26	-0.632593	0.00158725
1731	SLC25A1	ENSG00000100075	3787.63	-1.02147	0.00159665
1732	BLMH	ENSG00000108578	401.436	-0.532764	0.00160594
1733	PCMT1	ENSG00000120265	587.91	-0.613535	0.0016117
1734	FAM89B	ENSG00000176973	1019.31	-0.814005	0.00162321
1735	―	ENSG00000291081	92.2695	-0.781185	0.00163865
1736	TEN1-CDK3	ENSG00000261408	57.5913	-0.931374	0.00163968
1737	DUSP4	ENSG00000120875	237.68	-0.442663	0.00164095
1738	SDF4	ENSG00000078808	5657.19	-0.679368	0.0016505
1739	SNHG5	ENSG00000203875	256.07	-0.784218	0.0016505
1740	IL10RB	ENSG00000243646	480.927	-0.506977	0.00165391
1741	RPL10	ENSG00000147403	18152.5	-0.750828	0.00168501
1742	RNF26	ENSG00000173456	754.779	-0.681716	0.0016974
1743	VPS8	ENSG00000156931	371.512	-0.541235	0.00171459
1744	NUP43	ENSG00000120253	197.563	-0.601879	0.00171548
1745	EREG	ENSG00000124882	121.899	-1.52121	0.00174035
1746	TMSB4XP6	ENSG00000230043	15.5966	-2.52861	0.0017463
1747	CHMP4B	ENSG00000101421	1250.95	-0.592722	0.0017541
1748	SLC16A3	ENSG00000141526	5903.94	-0.699164	0.00175805
1749	CSRP2	ENSG00000175183	386.702	-0.767377	0.00176271
1750	ATP5MC2	ENSG00000135390	4647.34	-0.991798	0.00178527
1751	LGALS1	ENSG00000100097	29557.9	-1.09935	0.00178552
1752	HTR1B	ENSG00000135312	217.443	-1.41501	0.00179407
1753	POLD4	ENSG00000175482	687.655	-0.915336	0.00180768
1754	EIF3FP3	ENSG00000233426	32.2615	-1.3527	0.00181429
1755	MXRA8	ENSG00000162576	5139.21	-0.929912	0.0018216
1756	PRKAR1B	ENSG00000188191	308.691	-1.20613	0.00182289
1757	APRT	ENSG00000198931	1416.54	-0.983195	0.00182941
1758	―	ENSG00000279088	177.693	-0.919349	0.00184027
1759	PTGES2	ENSG00000148334	682.566	-1.01622	0.00184091
1760	UBALD2	ENSG00000185262	822.67	-1.0544	0.00184091
1761	PDK2	ENSG00000005882	586.007	-0.629384	0.00184222
1762	―	ENSG00000287908	71.6086	-2.21409	0.00184283
1763	IGFBP4	ENSG00000141753	29492.5	-1.01688	0.00184347
1764	NF2	ENSG00000186575	1516.55	-0.962142	0.0018495
1765	MYL6	ENSG00000092841	26071.5	-1.36481	0.00185409
1766	KIF7	ENSG00000166813	375.665	-0.497513	0.00185818
1767	QRICH1	ENSG00000198218	620.507	-0.634686	0.00186054
1768	RPLP0	ENSG00000089157	23498.5	-0.743496	0.00186279
1769	TNFRSF1B	ENSG00000028137	99.6256	-0.831718	0.00187105
1770	AGMAT	ENSG00000116771	28.6507	-0.919731	0.00187619
1771	NFKBIL1	ENSG00000204498	229.736	-1.44418	0.00189539
1772	CHRNE	ENSG00000108556	23.6553	-1.10671	0.0019041
1773	―	ENSG00000258985	6.43425	-4.34219	0.0019041
1774	CCND3	ENSG00000112576	1058.92	-0.459202	0.0019055
1775	―	ENSG00000269242	125.113	-1.99788	0.00190612
1776	VPS39	ENSG00000166887	1433.1	-0.382457	0.00190822
1777	ALG14	ENSG00000172339	159.076	-0.570097	0.00190855
1778	NBDY	ENSG00000204272	510.644	-0.613472	0.00190855
1779	LINC02693	ENSG00000212719	216.374	-0.674393	0.00194881
1780	PRKACA	ENSG00000072062	1949.94	-0.789499	0.00195501
1781	INPP5K	ENSG00000132376	458.449	-0.770472	0.00198046
1782	SIRT2	ENSG00000068903	1054.87	-0.61296	0.0019845
1783	PCDHB6	ENSG00000113211	3.46436	-3.10372	0.00199203
1784	―	ENSG00000233461	33.5327	-1.05121	0.00199305
1785	SNCG	ENSG00000173267	17.4999	-2.32728	0.00199803
1786	DDT	ENSG00000099977	771.959	-0.932557	0.00200018
1787	RGL3	ENSG00000205517	22.8022	-1.12902	0.00201489
1788	MPST	ENSG00000128309	516.906	-1.09317	0.00203871
1789	FXYD1	ENSG00000266964	61.1738	-1.33305	0.00203871
1790	TLE2	ENSG00000065717	14.6335	-1.3455	0.00205285
1791	CAND2	ENSG00000144712	110.934	-0.778912	0.00205285
1792	SRA1	ENSG00000213523	1270.19	-0.922792	0.00206665
1793	―	ENSG00000304969	12.1791	-1.8911	0.00206665
1794	P2RX6	ENSG00000099957	188.97	-1.35277	0.00206802
1795	REEP6	ENSG00000115255	49.2819	-1.44572	0.00206802
1796	SLC49A4	ENSG00000138463	125.109	-0.700322	0.00207726
1797	EGFL8	ENSG00000241404	105.863	-1.0655	0.00207869
1798	EXTL1	ENSG00000158008	297.387	-1.26273	0.0020816
1799	CXXC5	ENSG00000171604	925.728	-0.66029	0.00208338
1800	ATP5MC1	ENSG00000159199	1557.61	-1.02802	0.00208491
1801	―	ENSG00000278730	427.342	-0.55098	0.0020859
1802	CNOT3	ENSG00000088038	874.128	-0.5949	0.00208928
1803	PHB2	ENSG00000215021	2258.95	-0.691748	0.00210033
1804	―	ENSG00000242477	10.051	-2.23093	0.00210109
1805	ARF3	ENSG00000134287	3099.31	-0.464477	0.00210529
1806	GET3	ENSG00000198356	888.631	-0.483774	0.00212135
1807	CTSZ	ENSG00000101160	3084.45	-0.744565	0.00213523
1808	NDUFS6	ENSG00000145494	1060.26	-1.23589	0.00213523
1809	PHYKPL	ENSG00000175309	314.055	-0.397833	0.0021405
1810	TGM2	ENSG00000198959	983.545	-0.544918	0.00214092
1811	SERPINB6	ENSG00000124570	2474.19	-1.2679	0.00214267
1812	―	ENSG00000227615	16.3042	-1.48933	0.00215125
1813	SLC25A39	ENSG00000013306	1812.73	-0.830437	0.00215283
1814	VHL	ENSG00000134086	242.397	-0.574311	0.00215357
1815	RPS21	ENSG00000171858	1934.16	-1.08549	0.0021573
1816	TMSB15A	ENSG00000158164	11.3466	-2.22419	0.00217428
1817	TUBGCP2	ENSG00000130640	1118.94	-0.634022	0.00217887
1818	SNN	ENSG00000184602	221.188	-0.51998	0.00217887
1819	P2RX4	ENSG00000135124	296.076	-0.692771	0.00217891
1820	AMPD2	ENSG00000116337	1285.39	-0.48313	0.0021896
1821	―	ENSG00000224413	65.1377	-0.630779	0.00219716
1822	DYNC1LI1	ENSG00000144635	555.883	-0.459099	0.00220165
1823	MIF	ENSG00000240972	2818.15	-1.0002	0.00220582
1824	COL6A2	ENSG00000142173	90683.3	-0.804259	0.00221101
1825	APRG1	ENSG00000198590	10.7447	-1.45213	0.00224614
1826	STARD10	ENSG00000214530	191.032	-1.23401	0.00224622
1827	APOD	ENSG00000189058	1309.14	-0.881184	0.00224697
1828	PTBP1	ENSG00000011304	2767.16	-0.321206	0.00225944
1829	XPNPEP1	ENSG00000108039	631.857	-0.420142	0.0022687
1830	PTMS	ENSG00000159335	8283.37	-1.33344	0.00227869
1831	TAMM41	ENSG00000144559	137.315	-0.544782	0.00227984
1832	CDC42EP5	ENSG00000167617	972.72	-1.48649	0.00228242
1833	RPL39	ENSG00000198918	5542.92	-0.940267	0.0022961
1834	―	ENSG00000259807	97.5088	-0.799581	0.0022961
1835	CYB5R2	ENSG00000166394	1436.54	-0.725122	0.00230807
1836	MANF	ENSG00000145050	1123.85	-1.0986	0.00231221
1837	ATP5MJ	ENSG00000156411	712.534	-0.849372	0.00233101
1838	RUBCN	ENSG00000145016	339.895	-0.669493	0.00233846
1839	AGA	ENSG00000038002	469.141	-0.567486	0.00234552
1840	USP44	ENSG00000136014	4.75823	-3.01946	0.00235201
1841	SNAP47	ENSG00000143740	326.022	-0.571879	0.00235822
1842	TMEM45A	ENSG00000181458	467.492	-0.447848	0.00235974
1843	ARHGEF5	ENSG00000050327	164.563	-0.707161	0.00236139
1844	COPS7B	ENSG00000144524	789.8	-0.62215	0.00238014
1845	PPP2R3A	ENSG00000073711	191.867	-1.01138	0.00238189
1846	RNH1	ENSG00000023191	3260.46	-0.649293	0.00241664
1847	SERAC1	ENSG00000122335	70.7739	-0.99249	0.00242497
1848	RILPL2	ENSG00000150977	211.993	-0.623684	0.00243228
1849	FKBP5	ENSG00000096060	225.106	-0.761464	0.00243799
1850	DNAJB12	ENSG00000148719	617.967	-0.557749	0.00243799
1851	FKBP10	ENSG00000141756	12682.6	-0.786288	0.00247389
1852	TCEA2	ENSG00000171703	521.951	-1.0673	0.00247432
1853	―	ENSG00000304176	123.81	-0.506608	0.00247668
1854	COLQ	ENSG00000206561	59.9336	-0.926574	0.00249795
1855	RPL32P29	ENSG00000244270	25.9325	-1.26431	0.00252224
1856	PRCD	ENSG00000214140	56.2102	-0.797223	0.00252314
1857	RPL8	ENSG00000161016	14467	-1.01143	0.0025567
1858	WDR27	ENSG00000184465	178.08	-0.598184	0.00256167
1859	AP2A2	ENSG00000183020	1543.45	-0.714137	0.00256215
1860	LINC01547	ENSG00000183250	13.6889	-1.31207	0.00259145
1861	RBPMS	ENSG00000157110	1300.04	-0.629667	0.00259239
1862	RCC2	ENSG00000179051	873.04	-0.38649	0.00259259
1863	RAPGEFL1	ENSG00000108352	100.561	-1.01154	0.00259875
1864	UQCC5	ENSG00000168273	183.729	-1.05912	0.00259875
1865	―	ENSG00000291063	97.35	-1.05971	0.00259875
1866	NGLY1	ENSG00000151092	221.612	-0.512358	0.0026004
1867	AGBL5	ENSG00000084693	327.506	-0.400571	0.00260882
1868	CYTH4	ENSG00000100055	11.3784	-1.7799	0.00261537
1869	BRD3OS	ENSG00000235106	511.054	-0.346511	0.0026188
1870	TEX264	ENSG00000164081	706.41	-0.87122	0.00262111
1871	C6orf226	ENSG00000221821	42.8036	-1.15513	0.00264755
1872	LYRM4-AS1	ENSG00000272142	43.7119	-0.884403	0.00265143
1873	TXNL4A	ENSG00000141759	967.38	-0.881692	0.00266102
1874	TIMM13	ENSG00000099800	794.105	-1.22149	0.00267011
1875	―	ENSG00000307823	15.5392	-1.47856	0.0026738
1876	ATOSB	ENSG00000005238	967.034	-0.477275	0.00267596
1877	SEC14L1	ENSG00000129657	866.398	-0.437635	0.00268174
1878	RSRC1	ENSG00000174891	72.8115	-0.891522	0.00268752
1879	RNF144B	ENSG00000137393	39.7416	-1.03963	0.00268822
1880	STRN4	ENSG00000090372	1115.75	-0.499205	0.00269096
1881	H1-10-AS1	ENSG00000206417	68.1897	-1.3873	0.0027046
1882	FUNDC2	ENSG00000165775	705.416	-0.672812	0.00270878
1883	VNN1	ENSG00000112299	96.4454	-0.692279	0.00271508
1884	MFSD3	ENSG00000167700	326.608	-0.975683	0.0027234
1885	DNAJC30	ENSG00000176410	420.596	-0.828529	0.00272521
1886	RTN4IP1	ENSG00000130347	55.342	-0.78521	0.00272544
1887	ZNF775	ENSG00000196456	90.5652	-0.825646	0.00273135
1888	NRBP1	ENSG00000115216	1659.78	-0.510723	0.00273273
1889	AMOTL2	ENSG00000114019	1996.47	-0.706505	0.0027345
1890	NLGN2	ENSG00000169992	2174.73	-0.582957	0.00274219
1891	PGPEP1	ENSG00000130517	726.81	-0.854027	0.0027528
1892	UPP1	ENSG00000183696	743.863	-1.05344	0.00275794
1893	DHCR24-DT	ENSG00000233203	11.0682	-1.77504	0.00275955
1894	EIF1AXP1	ENSG00000236698	11.6922	-5.89668	0.00275955
1895	CCDC12	ENSG00000160799	167.455	-1.22558	0.00277974
1896	―	ENSG00000259605	186.119	-1.42999	0.00278439
1897	POLDIP2	ENSG00000004142	2049.75	-0.544877	0.00279234
1898	IGBP1	ENSG00000089289	593.358	-0.468018	0.00279296
1899	S100A5	ENSG00000196420	11.159	-2.57355	0.00279336
1900	SNRPD2	ENSG00000125743	1413.17	-1.02931	0.00280047
1901	DTD1	ENSG00000125821	599.076	-0.681266	0.00281754
1902	CFDP1	ENSG00000153774	580.269	-0.789183	0.00286102
1903	EI24	ENSG00000149547	2052.86	-0.36601	0.00287666
1904	―	ENSG00000274370	6.12962	-2.34078	0.00289854
1905	PSMD3	ENSG00000108344	1680.42	-0.422691	0.00292888
1906	DRG2	ENSG00000108591	522.286	-0.747901	0.00293985
1907	―	ENSG00000273149	17.0547	-1.46936	0.00296704
1908	SIPA1L2	ENSG00000116991	363.945	-0.846573	0.00296913
1909	SRM	ENSG00000116649	2050.83	-0.921754	0.00298154
1910	ARHGDIB	ENSG00000111348	49.8372	-1.428	0.00300133
1911	BANF1	ENSG00000175334	2058.11	-0.987204	0.00300133
1912	GSN	ENSG00000148180	7496.49	-0.514027	0.0030075
1913	MAGEL2	ENSG00000254585	2.74563	-4.09055	0.00301211
1914	TBC1D22A	ENSG00000054611	558.022	-0.789553	0.0030218
1915	OLFM1	ENSG00000130558	18.3542	-1.09438	0.00302351
1916	EFNB3	ENSG00000108947	10.4335	-1.97825	0.00303136
1917	AMZ1	ENSG00000174945	66.5475	-0.738611	0.0030394
1918	ZSCAN26	ENSG00000197062	100.246	-0.669834	0.00306306
1919	TECPR1	ENSG00000205356	393.544	-0.62705	0.00306306
1920	NME2	ENSG00000243678	4412.68	-0.887085	0.00308198
1921	NCLN	ENSG00000125912	2809.54	-0.980634	0.00310769
1922	LRRC28	ENSG00000168904	182.387	-0.482624	0.00311995
1923	ROBO1	ENSG00000169855	984.091	-1.35244	0.00314199
1924	DYM	ENSG00000141627	426.055	-0.320577	0.00316629
1925	―	ENSG00000230805	35.2931	-2.56676	0.00316629
1926	EMD	ENSG00000102119	1416.09	-0.676323	0.00316682
1927	FNDC11	ENSG00000125531	13.1532	-1.21944	0.00317547
1928	PLEKHG2	ENSG00000090924	1186.18	-0.580433	0.00319285
1929	LRP1	ENSG00000123384	12117.3	-0.613103	0.00319285
1930	―	ENSG00000275322	13.7294	-1.37627	0.00319556
1931	SDF2	ENSG00000132581	926.31	-0.570545	0.00323187
1932	SLC2A3	ENSG00000059804	958.56	-0.678354	0.00324775
1933	LINC00334	ENSG00000182586	52.2794	-2.85723	0.0032557
1934	UQCRFS1	ENSG00000169021	1036.35	-0.437214	0.00326982
1935	PHF1	ENSG00000112511	1041.72	-0.912143	0.00330548
1936	SNHG32	ENSG00000204387	1192.99	-0.688917	0.00330744
1937	GPC1	ENSG00000063660	6095.11	-0.577999	0.0033347
1938	LLGL1	ENSG00000131899	579.079	-0.544403	0.00335366
1939	AHSA1	ENSG00000100591	1175.37	-0.635044	0.00335635
1940	MAP2K5	ENSG00000137764	197.784	-0.542502	0.00336372
1941	ZDHHC12	ENSG00000160446	397.91	-0.817983	0.00338342
1942	GSK3B	ENSG00000082701	678.624	-0.675589	0.00339115
1943	RPL13	ENSG00000167526	13440.6	-1.17649	0.0034194
1944	PRSS30P	ENSG00000291300	5.56676	-4.98984	0.0034194
1945	DPH1	ENSG00000108963	857.222	-0.49417	0.00343763
1946	IFT57	ENSG00000114446	378.844	-0.597151	0.00344532
1947	MPC1	ENSG00000060762	200.58	-0.641815	0.00344711
1948	―	ENSG00000260927	307.4	-0.473067	0.00344711
1949	SUCLG2	ENSG00000172340	330.3	-0.807853	0.00346741
1950	SLIT3	ENSG00000184347	535.995	-0.773763	0.0034733
1951	PRPSAP1	ENSG00000161542	360.581	-0.374642	0.00349231
1952	LINC02883	ENSG00000259416	51.4344	-2.30978	0.0034936
1953	―	ENSG00000261103	3.99416	-2.8301	0.00351209
1954	STMP1	ENSG00000243317	602.248	-0.634986	0.00352069
1955	―	ENSG00000187186	41.6968	-1.42514	0.00352071
1956	KIF23-AS1	ENSG00000259426	85.5008	-0.583636	0.00352117
1957	NDUFA7	ENSG00000267855	456.556	-0.873298	0.00352117
1958	―	ENSG00000284829	7.42118	-5.34427	0.00352117
1959	SERINC2	ENSG00000168528	1879.67	-0.705947	0.00355295
1960	TLN1	ENSG00000137076	6460.04	-0.627593	0.00356886
1961	ATP5MG	ENSG00000167283	2529.5	-0.807451	0.00360116
1962	ATP5F1A	ENSG00000152234	5850.98	-0.382259	0.00361292
1963	ACTN4	ENSG00000130402	7406.53	-0.363499	0.00361725
1964	COX7A2L	ENSG00000115944	1172.07	-0.397625	0.00361908
1965	GGT7	ENSG00000131067	692.679	-0.542455	0.00366326
1966	PCDHGB4	ENSG00000253953	97.0822	-1.55399	0.00366612
1967	MGAT1	ENSG00000131446	5863.19	-0.669077	0.00367429
1968	ORAI3	ENSG00000175938	527.652	-0.637137	0.0036809
1969	CD276	ENSG00000103855	2933.33	-0.626719	0.00368705
1970	―	ENSG00000295157	17.4796	-1.56245	0.00369795
1971	VCP	ENSG00000165280	7893.68	-0.301125	0.00370249
1972	―	ENSG00000278952	11.093	-1.33689	0.00371076
1973	PEX10	ENSG00000157911	409.079	-0.458937	0.00372329
1974	ADORA2A	ENSG00000128271	18.8015	-1.10756	0.00372488
1975	ATP6AP1	ENSG00000071553	3581.22	-0.669701	0.00372807
1976	FOXF2	ENSG00000137273	320.6	-0.402469	0.00373204
1977	NABP2	ENSG00000139579	395.8	-0.384806	0.00373204
1978	SLC52A2	ENSG00000185803	1573.52	-0.597074	0.00373376
1979	MPG	ENSG00000103152	1130.37	-0.729325	0.00374533
1980	UCHL3	ENSG00000118939	330.647	-0.747711	0.00376877
1981	FCSK	ENSG00000157353	221.1	-0.530305	0.00379632
1982	PHETA1	ENSG00000198324	326.904	-0.789001	0.0038267
1983	GEMIN4	ENSG00000179409	315.656	-0.475764	0.00385706
1984	FLYWCH2	ENSG00000162076	238.113	-0.985835	0.00390216
1985	LPAR2	ENSG00000064547	384.723	-1.21889	0.00391018
1986	AGBL5-AS1	ENSG00000231636	3.42527	-2.7857	0.00391018
1987	RPL7AP66	ENSG00000175886	3.84877	-3.55468	0.00391914
1988	SPHK1	ENSG00000176170	1140.78	-1.32845	0.00392505
1989	SPPL3	ENSG00000157837	731.107	-0.464677	0.00393444
1990	ZNF414	ENSG00000133250	169.022	-1.19701	0.00394547
1991	MARCKS	ENSG00000277443	1673.45	-0.981924	0.00396294
1992	TMEM200A	ENSG00000164484	272.971	-1.36224	0.00400157
1993	FOXD2	ENSG00000186564	17.5616	-1.70817	0.00400269
1994	CCHCR1	ENSG00000204536	256.576	-1.10825	0.00400269
1995	LINC02844	ENSG00000253679	7.5115	-4.01399	0.00400269
1996	ATP5ME	ENSG00000169020	1257.14	-1.112	0.00403833
1997	TAF10	ENSG00000166337	1166.27	-0.713563	0.00403868
[truncated: 1,342 more rows]

## Sheet: YvsO(O↑)
	Supplementary Table S4E.
	DEGs in NHDFs (padj < 0.05).
	Gene name	Ensembl ID	baseMean	log2FC	padj
1	OAS2	ENSG00000111335	741.805	7.24237	3.5009e-208
2	ITIH5	ENSG00000123243	579.577	5.70374	7.5029e-187
3	ELN	ENSG00000049540	937.288	7.52053	1.28522e-182
4	MX1	ENSG00000157601	3684.27	5.463	2.53408e-169
5	IGFBP3	ENSG00000146674	2719.27	4.54885	5.51554e-162
6	FMOD	ENSG00000122176	898.259	3.8655	3.28176e-155
7	TMEM176A	ENSG00000002933	3061.24	8.07083	4.2851e-151
8	IFIT1	ENSG00000185745	1222.13	5.44909	9.66687e-134
9	IL13RA2	ENSG00000123496	275.818	5.08846	6.53455e-132
10	IFIT3	ENSG00000119917	1131.81	4.14138	3.50686e-123
11	USP18	ENSG00000184979	303.021	4.56687	7.94732e-122
12	COLEC10	ENSG00000184374	188.764	4.91183	1.53104e-121
13	SLC12A7	ENSG00000113504	218.437	3.15639	2.96769e-119
14	MX2	ENSG00000183486	508.008	7.49681	1.48335e-118
15	HERC6	ENSG00000138642	605.981	4.37124	9.0897e-118
16	KCNJ6	ENSG00000157542	237.447	5.13183	2.53542e-117
17	APCDD1	ENSG00000154856	3476.39	2.60258	3.51982e-117
18	GPC6	ENSG00000183098	291.981	6.9418	3.10728e-109
19	RIGI	ENSG00000107201	591.073	3.62551	8.39285e-108
20	PLXDC2	ENSG00000120594	302.956	4.28661	2.64668e-104
21	TXNIP	ENSG00000265972	5544.63	3.02477	2.32314e-101
22	KPRP	ENSG00000203786	1267.33	7.75531	1.57086e-94
23	OAS3	ENSG00000111331	1441.76	4.31653	4.67428e-94
24	TSPAN11	ENSG00000110900	108.702	4.75866	6.87771e-93
25	TMEM176B	ENSG00000106565	4191.83	6.57282	3.26949e-92
26	MMP3	ENSG00000149968	2104.82	3.11517	8.48724e-87
27	PDE1C	ENSG00000154678	306.234	4.22462	1.56397e-84
28	IFI44	ENSG00000137965	358.901	5.05691	1.44522e-82
29	CASP1	ENSG00000137752	861.643	2.2765	2.66939e-82
30	COL15A1	ENSG00000204291	843.258	5.25969	7.48505e-82
31	ACKR3	ENSG00000144476	184.214	5.46867	1.42448e-78
32	MAP6	ENSG00000171533	148.422	3.26466	3.00612e-77
33	INSC	ENSG00000188487	110.291	3.92579	8.21272e-77
34	SYT11	ENSG00000132718	650.95	2.25226	5.40525e-75
35	HERC5	ENSG00000138646	129.389	5.94419	3.47643e-73
36	BST2	ENSG00000130303	1591.73	9.35772	5.70283e-73
37	GREM2	ENSG00000180875	167.966	4.57579	4.47078e-68
38	BMP4	ENSG00000125378	795.165	2.90211	5.03378e-67
39	STOM	ENSG00000148175	1782.61	1.79883	6.62428e-67
40	C1S	ENSG00000182326	3713.54	2.39163	8.54733e-67
41	SLC47A1	ENSG00000142494	77.0316	4.89	2.19849e-66
42	NTN1	ENSG00000065320	175.701	4.4174	2.64135e-65
43	MMP1	ENSG00000196611	4320.98	2.69643	2.63347e-64
44	APBB1IP	ENSG00000077420	103.33	4.34708	3.14679e-64
45	ALDH3A2	ENSG00000072210	401.04	2.02176	1.5228e-62
46	GABBR2	ENSG00000136928	189.265	5.51542	9.54697e-62
47	LCE2A	ENSG00000187173	530.584	5.98003	7.16315e-61
48	SLCO3A1	ENSG00000176463	283.621	1.91102	4.13408e-60
49	SOD3	ENSG00000109610	5547.29	4.91077	4.30949e-59
50	MAN1C1	ENSG00000117643	116.611	4.37406	2.3127e-58
51	NCAM1	ENSG00000149294	89.744	4.47644	6.18771e-58
52	PARP14	ENSG00000173193	933.231	1.87786	4.92069e-57
53	IFI6	ENSG00000126709	3880.11	5.17578	8.16343e-57
54	SYPL2	ENSG00000143028	528.321	2.67911	9.05822e-57
55	C3	ENSG00000125730	182.623	2.4966	1.73641e-56
56	ST8SIA1	ENSG00000111728	79.895	3.75538	3.76504e-56
57	SEPTIN3	ENSG00000100167	70.7584	5.01555	3.31695e-55
58	ALDH3A1	ENSG00000108602	377.479	4.44138	3.08347e-53
59	PARD6G	ENSG00000178184	138.445	3.26183	3.1234e-53
60	DPT	ENSG00000143196	86.2409	4.24284	4.76423e-53
61	EPSTI1	ENSG00000133106	209.767	2.47605	1.69039e-52
62	ANKFN1	ENSG00000153930	67.0691	5.27033	3.10079e-52
63	HSPB8	ENSG00000152137	323.137	2.35374	3.22555e-52
64	PURPL	ENSG00000250337	187.053	6.5745	1.1692e-51
65	KYNU	ENSG00000115919	132.729	3.78787	1.71134e-51
66	SLITRK1	ENSG00000178235	153.322	6.90479	2.55194e-51
67	―	ENSG00000278932	98.6604	5.13188	3.90364e-51
68	C1R	ENSG00000159403	3115.58	2.9647	5.13772e-51
69	IFIT2	ENSG00000119922	330.597	4.53492	6.46315e-51
70	TFPI2	ENSG00000105825	702.364	3.49306	1.00625e-50
71	HOXD3	ENSG00000128652	100.952	2.60941	4.55451e-50
72	FAM89A	ENSG00000182118	178.939	2.68852	8.9465e-50
73	LRATD1	ENSG00000162981	1254.8	2.49952	1.10297e-49
74	BATF2	ENSG00000168062	221.463	3.66121	1.79626e-49
75	EFHD1	ENSG00000115468	70.8618	3.72727	8.3946e-49
76	RIPOR3	ENSG00000042062	94.0755	3.08735	9.49519e-49
77	CCDC184	ENSG00000177875	72.3797	4.30977	9.86241e-49
78	IFIH1	ENSG00000115267	247.438	4.0264	1.09669e-48
79	ANK1	ENSG00000029534	328.112	2.1404	2.44094e-48
80	PLBD1	ENSG00000121316	111.74	2.96382	2.56983e-48
81	NALF1	ENSG00000204442	454.229	3.15926	8.54305e-47
82	PDE1A	ENSG00000115252	109.432	3.75451	1.30653e-46
83	DDX10	ENSG00000178105	389.287	1.36378	1.31346e-46
84	TLR3	ENSG00000164342	120.034	5.79045	2.35245e-46
85	ID3	ENSG00000117318	443.739	3.33222	2.45539e-46
86	MAPT	ENSG00000186868	61.6597	3.50186	5.78741e-46
87	SERPINE2	ENSG00000135919	18622.8	2.6946	5.93913e-45
88	SULF1	ENSG00000137573	301.062	4.39462	1.18284e-44
89	PTPRN2	ENSG00000155093	63.8889	3.74297	1.82259e-44
90	ABCG1	ENSG00000160179	54.8395	4.81293	3.97686e-44
91	CTSK	ENSG00000143387	6066.07	1.54168	4.37124e-44
92	SLC6A17	ENSG00000197106	212.038	3.23228	1.59848e-43
93	NRK	ENSG00000123572	140.814	5.88171	8.50733e-43
94	NMRAL2P	ENSG00000290862	152.977	1.83068	9.06397e-43
95	DCN	ENSG00000011465	8899.47	2.0009	1.33704e-42
96	TENT5A	ENSG00000112773	312.778	1.89821	2.09212e-42
97	IFITM1	ENSG00000185885	2535.46	4.65988	3.00124e-42
98	CCND2	ENSG00000118971	5114.04	2.90323	5.9052e-41
99	NETO1	ENSG00000166342	78.4057	5.12996	2.15849e-40
100	PARP9	ENSG00000138496	457.741	2.80115	3.96606e-40
101	KCNS3	ENSG00000170745	79.4208	2.29332	4.14003e-40
102	ANO3	ENSG00000134343	81.1118	4.93621	5.45009e-40
103	CCDC9B	ENSG00000188549	685.597	1.55586	5.84204e-40
104	STC2	ENSG00000113739	4337.71	1.19603	6.69276e-40
105	FOXQ1	ENSG00000164379	69.6015	3.19981	6.79848e-40
106	LINC00649	ENSG00000237945	60.7066	3.67103	7.01571e-40
107	TMEM140	ENSG00000146859	221.056	1.97253	1.14704e-39
108	A2M	ENSG00000175899	63.9801	3.49104	2.78787e-39
109	SYNM	ENSG00000182253	184.602	2.94114	7.5585e-39
110	JAM2	ENSG00000154721	97.1722	3.50446	7.8667e-39
111	IFI27	ENSG00000165949	589.779	5.50999	8.07815e-39
112	LRATD2	ENSG00000168672	103.206	3.78669	1.33846e-38
113	GL000214.1	ENSG00000303221	56.1589	5.81687	4.71369e-38
114	RAB27B	ENSG00000041353	341.037	5.71133	7.14689e-38
115	CMPK2	ENSG00000134326	144.204	8.42364	2.26936e-37
116	RETREG1	ENSG00000154153	40.5343	4.53626	3.21759e-37
117	THBD	ENSG00000178726	60.0087	4.97455	6.05099e-37
118	SCN2A	ENSG00000136531	118.115	5.35777	8.56618e-37
119	RTN4RL1	ENSG00000185924	63.8915	3.95838	8.71818e-37
120	CCL5	ENSG00000271503	65.7687	6.23416	1.0317e-36
121	―	ENSG00000290397	103.657	6.34014	1.59519e-36
122	SYT17	ENSG00000103528	43.1558	4.68049	6.4504e-36
123	GL000214.1	ENSG00000303173	44.957	5.19505	1.94334e-35
124	MSC-AS1	ENSG00000235531	83.4799	2.88442	2.41077e-35
125	CTSH	ENSG00000103811	293.442	2.53009	2.75407e-35
126	SULF2	ENSG00000196562	819.57	2.04492	4.16625e-35
127	CD36	ENSG00000135218	113.209	4.30505	8.86453e-35
128	ITGA11	ENSG00000137809	593.156	2.10487	1.08315e-34
129	CYP4V2	ENSG00000145476	253.131	2.21716	1.86695e-34
130	GPNMB	ENSG00000136235	3765.91	2.08108	5.91559e-34
131	GRIA1	ENSG00000155511	466.811	1.50912	6.9231e-34
132	CSGALNACT1	ENSG00000147408	39.9095	4.44369	7.17739e-34
133	XAF1	ENSG00000132530	769.645	2.75591	7.4856e-34
134	PRELP	ENSG00000188783	426.142	2.56882	7.81132e-34
135	CPE	ENSG00000109472	298.798	3.15273	1.02944e-33
136	GPR37	ENSG00000170775	76.0854	6.61345	1.23577e-33
137	IFI44L	ENSG00000137959	440.929	10.9201	1.3229e-33
138	TRIM25	ENSG00000121060	1147.7	1.6891	1.67155e-33
139	PIK3IP1	ENSG00000100100	435.362	1.67219	1.83255e-33
140	EBF4	ENSG00000088881	176.176	3.66253	2.33325e-33
141	LGALS9	ENSG00000168961	146.306	4.84024	3.06476e-33
142	GRAMD1B	ENSG00000023171	137.869	2.17607	3.97027e-33
143	KCNQ3	ENSG00000184156	92.1131	3.57564	4.47164e-33
144	RFLNA	ENSG00000178882	42.3396	4.35493	5.99027e-33
145	FABP4	ENSG00000170323	103.844	3.47625	9.26736e-33
146	HAGLR	ENSG00000224189	96.5801	2.89925	1.27563e-32
147	DTX4	ENSG00000110042	803.002	2.45739	1.92065e-32
148	KIAA1671	ENSG00000197077	85.6006	3.33827	4.65745e-32
149	MSC	ENSG00000178860	231.356	2.46304	5.18223e-32
150	PMEPA1	ENSG00000124225	73.9475	2.60281	6.49544e-32
151	RNF213	ENSG00000173821	2575.12	2.02998	8.31292e-32
152	FAIM2	ENSG00000135472	89.1006	2.79652	8.47849e-32
153	CTSS	ENSG00000163131	111.967	2.23238	9.06913e-32
154	ATP10A	ENSG00000206190	133.023	2.0415	1.36297e-31
155	CLIC2	ENSG00000155962	51.4945	6.44982	1.58018e-31
156	SNCA	ENSG00000145335	270.132	2.05732	1.9255e-31
157	HPSE	ENSG00000173083	44.4446	3.14418	1.95467e-31
158	TSPAN15	ENSG00000099282	187.335	2.54779	2.32027e-31
159	CADM1	ENSG00000182985	44.9726	3.48479	4.29921e-31
160	GDNF	ENSG00000168621	39.7102	3.55814	5.48761e-31
161	TMEM130	ENSG00000166448	106.681	2.29425	7.2945e-31
162	KI270751.1	ENSG00000303902	60.6806	6.12477	9.56413e-31
163	LPL	ENSG00000175445	85.4589	7.66403	3.0327e-30
164	PLCB4	ENSG00000101333	126.357	2.9278	4.448e-30
165	MANBA	ENSG00000109323	560.878	1.23148	5.27279e-30
166	ACSL5	ENSG00000197142	31.6882	3.61406	5.54819e-30
167	NPTXR	ENSG00000221890	198.569	1.8671	5.70598e-30
168	SP110	ENSG00000135899	312.63	1.33681	7.64628e-30
169	ZNF503	ENSG00000165655	114.224	2.65945	9.77489e-30
170	SCD5	ENSG00000145284	437.01	2.64918	1.37365e-29
171	CXCL11	ENSG00000169248	56.3003	4.02468	2.25967e-29
172	EMB	ENSG00000170571	129.432	8.75111	2.4822e-29
173	GRP	ENSG00000134443	159.783	3.12013	3.2254e-29
174	PAK3	ENSG00000077264	47.0762	3.98928	5.7526e-29
175	H3-7	ENSG00000273213	139.855	1.7534	5.79029e-29
176	KRT40	ENSG00000204889	38.7092	5.39915	6.95461e-29
177	COMP	ENSG00000105664	123.11	8.66987	9.98223e-29
178	CAMK4	ENSG00000152495	99.341	2.25295	1.06843e-28
179	PPFIA4	ENSG00000143847	115.932	2.31575	1.53167e-28
180	TMEM178B	ENSG00000261115	64.4312	5.39168	2.57272e-28
181	SAMHD1	ENSG00000101347	481.236	2.33521	6.01932e-28
182	ACACB	ENSG00000076555	88.8652	2.53231	1.04146e-27
183	C11orf87	ENSG00000185742	44.1782	5.1628	1.05621e-27
184	LIMCH1	ENSG00000064042	222.598	3.44759	1.20128e-27
185	TRIM14	ENSG00000106785	579.574	2.10346	1.48771e-27
186	APOBEC3G	ENSG00000239713	133.537	1.95158	1.6076e-27
187	RAB38	ENSG00000123892	123.981	2.01871	1.94205e-27
188	EPHX2	ENSG00000120915	63.3671	2.91407	2.35134e-27
189	ANKRD29	ENSG00000154065	94.3518	2.75488	2.66816e-27
190	STAT2	ENSG00000170581	3190.14	1.5556	3.29229e-27
191	MGAT5B	ENSG00000167889	140.911	1.97382	3.98636e-27
192	―	ENSG00000291089	81.1982	3.63078	4.00478e-27
193	HELZ2	ENSG00000130589	678.508	1.86112	4.01136e-27
194	EFR3B	ENSG00000084710	32.5693	3.96417	4.63099e-27
195	RDH10	ENSG00000121039	147.516	2.50331	6.0391e-27
196	MCF2L	ENSG00000126217	42.1297	3.70109	8.12276e-27
197	ITGBL1	ENSG00000198542	967.374	2.25971	9.31629e-27
198	CIMAP3	ENSG00000173947	38.8179	3.41166	1.05302e-26
199	DTX3L	ENSG00000163840	467.925	1.70498	1.18271e-26
200	DDX60L	ENSG00000181381	930.213	3.63519	1.70427e-26
201	VSTM4	ENSG00000165633	126.866	1.6708	2.02686e-26
202	FAM149A	ENSG00000109794	36.7083	3.19677	2.25055e-26
203	TNFSF18	ENSG00000120337	189.235	2.07838	3.17155e-26
204	SEMA6A	ENSG00000092421	226.866	1.46145	3.93733e-26
205	SAMD9	ENSG00000205413	305.269	3.8772	6.94124e-26
206	MAPK10	ENSG00000109339	61.3596	2.03373	9.18765e-26
207	CACNA1A	ENSG00000141837	272.612	2.6756	9.59938e-26
208	CDH6	ENSG00000113361	225.785	10.4273	1.18807e-25
209	ADH1B	ENSG00000196616	51.568	3.72329	1.2537e-25
210	NFASC	ENSG00000163531	118.21	1.79684	1.2932e-25
211	TEK	ENSG00000120156	59.3129	4.61352	1.41066e-25
212	SYT1	ENSG00000067715	179.915	3.1763	1.98971e-25
213	CTSC	ENSG00000109861	3601.29	1.35217	3.2717e-25
214	NPTX1	ENSG00000171246	2254.23	2.60437	4.54154e-25
215	COLGALT2	ENSG00000198756	63.9197	2.08449	5.18672e-25
216	BMP2	ENSG00000125845	293.346	2.1808	5.30472e-25
217	HAPLN1	ENSG00000145681	38.826	5.94032	5.75918e-25
218	PAG1	ENSG00000076641	422.983	2.70666	6.21103e-25
219	IRF9	ENSG00000213928	728.196	2.19174	6.22633e-25
220	EPDR1	ENSG00000086289	275.698	2.26413	7.31194e-25
221	CDK18	ENSG00000117266	32.7781	5.63261	8.69182e-25
222	HSD17B2	ENSG00000086696	827.769	1.98086	9.77536e-25
223	INHBA	ENSG00000122641	184.343	3.04091	1.09725e-24
224	SLC38A11	ENSG00000169507	155.336	2.86483	1.25887e-24
225	HGF	ENSG00000019991	767.525	3.62865	1.34945e-24
226	C1orf226	ENSG00000239887	28.4319	4.8475	1.55723e-24
227	SORL1	ENSG00000137642	43.9534	4.43672	1.73718e-24
228	OLFML2B	ENSG00000162745	168.032	1.72353	1.81564e-24
229	PARP8	ENSG00000151883	89.0629	3.0467	1.81855e-24
230	PALMD	ENSG00000099260	43.0301	2.79527	3.34023e-24
231	LIPC	ENSG00000166035	35.8568	3.0231	3.94915e-24
232	TMEM229B	ENSG00000198133	42.059	3.43032	4.16314e-24
233	CIART	ENSG00000159208	83.306	2.10051	4.50999e-24
234	LBH	ENSG00000213626	607.544	1.58077	5.08887e-24
235	OAS1	ENSG00000089127	788.392	12.8195	1.49119e-23
236	RAB31	ENSG00000168461	527.72	1.26555	2.2854e-23
237	MGAT3	ENSG00000128268	118.169	2.33648	2.30721e-23
238	CCN3	ENSG00000136999	230.504	2.92082	2.30721e-23
239	OASL	ENSG00000135114	89.2416	8.26291	5.4146e-23
240	NR1D1	ENSG00000126368	185.706	2.1224	1.2775e-22
241	SAMD9L	ENSG00000177409	640.91	3.12406	1.29395e-22
242	CREG1	ENSG00000143162	478.283	1.95531	1.61863e-22
243	PLPP3	ENSG00000162407	805.258	3.18742	2.03917e-22
244	NAAA	ENSG00000138744	455.949	1.44635	2.24114e-22
245	KATNAL2	ENSG00000167216	99.3563	1.75629	2.25068e-22
246	HECW1	ENSG00000002746	113.47	1.54751	2.59185e-22
247	LAPTM5	ENSG00000162511	34.9851	3.30371	2.80024e-22
248	SEMA6D	ENSG00000137872	67.8597	4.10684	3.30578e-22
249	DHX58	ENSG00000108771	338.683	1.90327	4.36557e-22
250	ASPN	ENSG00000106819	91.3592	3.2557	4.84327e-22
251	NRXN3	ENSG00000021645	30.9001	5.72367	5.22191e-22
252	SPTBN4	ENSG00000160460	57.9666	2.17379	5.22193e-22
253	FNDC5	ENSG00000160097	36.5622	3.25727	6.5512e-22
254	SPOCK1	ENSG00000152377	953.934	2.05254	9.0068e-22
255	SLC52A1	ENSG00000132517	70.3302	3.20831	1.04168e-21
256	MBNL3	ENSG00000076770	150.077	3.46636	1.09315e-21
257	GREB1L	ENSG00000141449	57.8493	2.71188	1.47488e-21
258	FAXDC2	ENSG00000170271	179.823	1.7673	1.72261e-21
259	MAP2K6	ENSG00000108984	95.7826	2.15614	1.9878e-21
260	DISP2	ENSG00000140323	119.16	1.88557	2.28363e-21
261	SOX6	ENSG00000110693	26.4045	4.63749	3.37913e-21
262	ZNFX1	ENSG00000124201	1274.05	1.38647	3.80762e-21
263	RASSF2	ENSG00000101265	815.314	2.36517	4.36822e-21
264	LAMA3	ENSG00000053747	124.897	2.58898	5.25473e-21
265	CPQ	ENSG00000104324	842.824	1.25139	5.25473e-21
266	PARM1	ENSG00000169116	24.9767	4.45695	5.34439e-21
267	TRIM34	ENSG00000258659	99.8986	2.14076	6.12085e-21
268	OLFML1	ENSG00000183801	93.9468	1.66815	7.86667e-21
269	EIF2AK2	ENSG00000055332	1174.87	2.773	1.00225e-20
270	HSPA12A	ENSG00000165868	455.256	1.57664	1.067e-20
271	GL000218.1	ENSG00000301761	29.4363	3.08634	1.07065e-20
272	PRSS23	ENSG00000150687	5130.11	1.33756	1.09916e-20
273	REC8	ENSG00000100918	266.278	1.90314	1.34492e-20
274	HSPB7	ENSG00000173641	304.289	1.96935	1.59243e-20
275	COLEC12	ENSG00000158270	129.187	2.38033	1.73351e-20
276	SMAD7	ENSG00000101665	85.7803	2.0025	2.47865e-20
277	ARSL	ENSG00000157399	78.9063	1.86866	2.82846e-20
278	SLC46A3	ENSG00000139508	92.5638	1.98567	3.5843e-20
279	PCDH7	ENSG00000169851	151.391	2.75526	4.86337e-20
280	ACTR3B	ENSG00000133627	123.116	1.30469	7.21114e-20
281	FZD4	ENSG00000174804	124.946	1.68353	7.31173e-20
282	SERPINB2	ENSG00000197632	375.91	3.49296	7.87522e-20
283	CNTN1	ENSG00000018236	41.5501	5.9017	9.21116e-20
284	GCA	ENSG00000115271	27.6365	3.30368	9.63742e-20
285	―	ENSG00000287839	325.871	1.28343	1.29503e-19
286	PENK	ENSG00000181195	101.144	1.9669	1.34172e-19
287	MLKL	ENSG00000168404	236.356	1.24354	1.41945e-19
288	CRISPLD1	ENSG00000121005	26.9451	5.97546	1.56096e-19
289	SMPD3	ENSG00000103056	36.1867	2.30821	1.75158e-19
290	HOXD4	ENSG00000170166	130.975	1.85801	1.79585e-19
291	RGS9	ENSG00000108370	40.0495	2.91019	1.8116e-19
292	APOL6	ENSG00000221963	475.355	2.01361	1.94133e-19
293	ARHGAP20	ENSG00000137727	95.968	4.07456	2.06001e-19
294	GALNT16	ENSG00000100626	104.169	1.57731	2.11779e-19
295	ABI3BP	ENSG00000154175	195.129	3.71294	2.14998e-19
296	TRIM69	ENSG00000185880	293.829	1.93889	2.17856e-19
297	DDX60	ENSG00000137628	369.873	3.81945	2.34686e-19
298	―	ENSG00000293141	105.595	1.87101	2.43255e-19
299	SOCS2	ENSG00000120833	68.6949	1.87486	3.48353e-19
300	ETV7	ENSG00000010030	44.3935	3.2851	3.86743e-19
301	PGM5	ENSG00000154330	104.933	1.6254	4.08438e-19
302	MANEAL	ENSG00000185090	65.8337	1.88523	4.13897e-19
303	SUGCT	ENSG00000175600	208.53	1.46105	5.29566e-19
304	CGREF1	ENSG00000138028	39.8721	2.3163	7.24663e-19
305	CACNA1G	ENSG00000006283	26.5525	3.42828	9.0873e-19
306	PDZD4	ENSG00000067840	65.5849	2.27521	1.01569e-18
307	SP100	ENSG00000067066	579.413	1.36736	1.06329e-18
308	DAPK1	ENSG00000196730	72.2013	2.50243	1.28607e-18
309	CCDC102B	ENSG00000150636	274.742	2.09304	1.33352e-18
310	BCL2	ENSG00000171791	63.8334	2.39286	1.90882e-18
311	HUNK	ENSG00000142149	30.5666	6.35911	2.12247e-18
312	GPR68	ENSG00000119714	428.856	1.46429	2.22805e-18
313	STXBP5-AS1	ENSG00000233452	32.7799	2.70584	3.28919e-18
314	EDIL3	ENSG00000164176	71.0417	3.65226	4.25943e-18
315	MTMR11	ENSG00000014914	339.555	1.0076	4.66527e-18
316	KIAA0040	ENSG00000235750	33.1012	2.79645	5.16165e-18
317	ENTPD1	ENSG00000138185	186.624	1.49575	5.19287e-18
318	FGF13	ENSG00000129682	21.3384	4.77693	5.53308e-18
319	NAP1L3	ENSG00000186310	33.7482	4.06894	6.87685e-18
320	PCDHB2	ENSG00000112852	26.682	3.77572	7.18801e-18
321	CYP7B1	ENSG00000172817	86.9304	3.41106	7.23533e-18
322	SLC39A8	ENSG00000138821	121.783	2.9448	7.25012e-18
323	PLCE1	ENSG00000138193	57.7837	2.26488	7.50501e-18
324	C3orf80	ENSG00000180044	33.2279	6.69013	7.59935e-18
325	CXCL16	ENSG00000161921	70.0004	1.90108	7.80776e-18
326	PTN	ENSG00000105894	618.181	1.80022	8.79077e-18
327	TMEM35A	ENSG00000126950	322.179	1.91757	8.92423e-18
328	CYP2J2	ENSG00000134716	37.2986	2.74684	9.98742e-18
329	AKAP6	ENSG00000151320	68.0226	3.59652	1.11187e-17
330	KCNMA1	ENSG00000156113	1381.3	2.03181	1.66846e-17
331	GALNT12	ENSG00000119514	19.4134	3.57509	1.68817e-17
332	TMEM150C	ENSG00000249242	30.9871	3.92339	1.82353e-17
333	NDRG4	ENSG00000103034	170.373	1.60588	1.93727e-17
334	FBXO41	ENSG00000163013	125.208	1.39822	2.06373e-17
335	―	ENSG00000294734	1542.78	4.59791	2.1343e-17
336	TRPA1	ENSG00000104321	3622.42	1.75626	2.20521e-17
337	INHBB	ENSG00000163083	277.606	1.56021	2.30335e-17
338	SECTM1	ENSG00000141574	566.963	2.40232	3.37056e-17
339	KCNS2	ENSG00000156486	78.638	2.22704	3.54306e-17
340	KLHL3	ENSG00000146021	39.0908	2.32332	5.30677e-17
341	BDNF	ENSG00000176697	320.507	1.47422	5.30677e-17
342	SLC37A1	ENSG00000160190	18.7312	4.35343	5.46828e-17
343	TENM3	ENSG00000218336	40.3561	3.04997	6.30938e-17
344	NPR3	ENSG00000113389	79.0016	2.32974	7.00533e-17
345	―	ENSG00000274718	19.4855	3.69995	7.07471e-17
346	IFIT5	ENSG00000152778	328.614	1.36787	7.35091e-17
347	DEPTOR	ENSG00000155792	27.6784	2.75817	8.4321e-17
348	LINC00839	ENSG00000185904	235.874	0.995542	9.13739e-17
349	―	ENSG00000301873	19.2972	4.73217	9.26583e-17
350	DHRS7	ENSG00000100612	1265.99	0.904819	1.03306e-16
351	CEP126	ENSG00000110318	70.0507	2.16051	1.11053e-16
352	GGTA1	ENSG00000204136	21.4013	3.14724	1.41918e-16
353	IQCA1	ENSG00000132321	22.1552	5.94423	2.37686e-16
354	PDE4B	ENSG00000184588	98.1274	2.92983	2.41902e-16
355	KCNJ2	ENSG00000123700	24.3793	3.64763	2.76149e-16
356	TRPC4	ENSG00000133107	22.241	3.79668	2.77681e-16
357	RRAGD	ENSG00000025039	17.8894	5.13892	3.00547e-16
358	ISM1	ENSG00000101230	92.8763	3.27128	3.05917e-16
359	TUB	ENSG00000166402	151.84	2.28709	3.07175e-16
360	IL1RL1	ENSG00000115602	19.7439	4.66867	3.17886e-16
361	BTG1	ENSG00000133639	817.007	2.08936	3.38868e-16
362	ARNT2	ENSG00000172379	178.399	1.44325	3.52075e-16
363	TMEM26	ENSG00000196932	41.4624	2.41793	3.67922e-16
364	TDRD7	ENSG00000196116	224.144	1.30154	3.77513e-16
365	TMEM178A	ENSG00000152154	93.1672	1.37973	3.82034e-16
366	EEPD1	ENSG00000122547	150.639	1.27642	4.03712e-16
367	ABCB1	ENSG00000085563	69.5487	3.83996	4.31959e-16
368	AFF3	ENSG00000144218	219.855	2.84555	4.337e-16
369	DLG3	ENSG00000082458	206.274	0.969067	4.39888e-16
370	ST6GALNAC5	ENSG00000117069	21.6806	5.17702	4.39888e-16
371	CYTL1	ENSG00000170891	71.5113	2.06341	5.83758e-16
372	―	ENSG00000247134	20.0008	5.50701	6.07287e-16
373	DPY19L2	ENSG00000177990	116	2.09306	6.11689e-16
374	FGF2	ENSG00000138685	593.106	2.20062	6.69075e-16
375	GPAT2	ENSG00000186281	346.045	1.32593	7.25531e-16
376	CLCN4	ENSG00000073464	58.7052	2.48781	7.41943e-16
377	UBE2L6	ENSG00000156587	1370.27	1.41726	9.64174e-16
378	VNN1	ENSG00000112299	96.4454	1.98118	9.68635e-16
379	AVIL	ENSG00000135407	44.1983	2.25196	9.73694e-16
380	SELENOP	ENSG00000250722	85.0192	2.57784	1.14581e-15
381	RTP4	ENSG00000136514	54.4559	2.75634	1.21318e-15
382	CDH2	ENSG00000170558	158.404	2.17088	1.23897e-15
383	CRACD	ENSG00000109265	84.1837	3.3383	1.25396e-15
384	LRRN4CL	ENSG00000177363	496.785	1.0568	1.89544e-15
385	IL12RB1	ENSG00000096996	30.9335	3.28241	2.11452e-15
386	FBXO32	ENSG00000156804	86.0841	1.62891	2.8637e-15
387	AMIGO2	ENSG00000139211	172.913	2.17697	2.9187e-15
388	TP53INP1	ENSG00000164938	481.298	1.68551	3.15654e-15
389	CLDN23	ENSG00000253958	19.4621	3.98485	3.19952e-15
390	SMO	ENSG00000128602	199.045	1.54592	3.62243e-15
391	KI270744.1	ENSG00000300074	19.5531	5.49801	3.93894e-15
392	TMEM144	ENSG00000164124	78.2215	2.24516	4.00005e-15
393	MGP	ENSG00000111341	88.5729	2.4665	4.89397e-15
394	GDF6	ENSG00000156466	41.8169	2.88023	4.99211e-15
395	EPHA5	ENSG00000145242	28.7466	6.96848	5.1816e-15
396	IGFBP7	ENSG00000163453	2797.38	1.16373	5.19806e-15
397	RNF170	ENSG00000120925	313.044	1.27183	5.51962e-15
398	TMT1A	ENSG00000185432	108.463	2.14826	6.14156e-15
399	FZD8	ENSG00000177283	137.767	1.6359	6.85492e-15
400	PHYH	ENSG00000107537	352.843	1.07132	7.34564e-15
401	CAPN3	ENSG00000092529	190.827	1.22568	7.43901e-15
402	PARP12	ENSG00000059378	491.246	1.79332	8.47511e-15
403	SLC27A6	ENSG00000113396	29.281	3.60062	9.22239e-15
404	C1orf198	ENSG00000119280	2524.45	0.815889	1.02917e-14
405	MMP16	ENSG00000156103	155.339	2.57288	1.10217e-14
406	MTSS2	ENSG00000132613	1467.97	0.920113	1.25833e-14
407	MCTP2	ENSG00000140563	136.122	2.3606	1.42587e-14
408	CHRM2	ENSG00000181072	871.82	2.30444	1.4612e-14
409	CLCA2	ENSG00000137975	70.311	2.82589	1.64167e-14
410	FUCA1	ENSG00000179163	237.276	1.51083	1.77005e-14
411	SLC1A1	ENSG00000106688	228.882	2.56505	1.8231e-14
412	LAP3	ENSG00000002549	791.678	1.16648	1.9521e-14
413	ADAR	ENSG00000160710	3621.53	0.948857	2.04074e-14
414	CFAP263	ENSG00000103021	118.275	1.18796	2.3205e-14
415	GBP4	ENSG00000162654	17.5417	5.46048	2.80027e-14
416	KDSR	ENSG00000119537	588.577	1.46932	2.91075e-14
417	PNMA2	ENSG00000240694	15.5886	4.35815	2.9717e-14
418	TPP1	ENSG00000166340	3783.71	0.864493	3.0307e-14
419	TCTN2	ENSG00000168778	263.585	0.967361	3.11239e-14
420	STK32B	ENSG00000152953	345.939	1.35363	3.53981e-14
421	TM4SF1	ENSG00000169908	143.264	1.47939	3.77426e-14
422	ABCA1	ENSG00000165029	296.471	3.12205	3.88154e-14
423	SLC40A1	ENSG00000138449	88.3133	3.0085	4.12701e-14
424	CFB	ENSG00000243649	28.5879	3.1496	5.13541e-14
425	ZNF804A	ENSG00000170396	59.3888	1.68296	5.34465e-14
426	CSDC2	ENSG00000172346	122.353	2.06211	5.69997e-14
427	PALM	ENSG00000099864	54.7475	3.9071	5.92494e-14
428	IRF7	ENSG00000185507	189.14	2.51489	6.27798e-14
429	TACR1	ENSG00000115353	18.4814	4.85917	6.43711e-14
430	B2M	ENSG00000166710	35921.8	1.50601	6.92063e-14
431	FAM174B	ENSG00000185442	20.0816	3.16745	6.96786e-14
432	FNIP2	ENSG00000052795	147.626	2.45319	7.09227e-14
433	LINC01116	ENSG00000163364	182.459	1.0682	7.09227e-14
434	KCTD12	ENSG00000178695	230.693	2.75149	7.77442e-14
435	CIMAP1B	ENSG00000177989	37.3589	3.67779	8.25651e-14
436	AIF1L	ENSG00000126878	31.1146	2.38805	8.4846e-14
437	TRANK1	ENSG00000168016	492.063	1.35885	8.57001e-14
438	AZIN2	ENSG00000142920	140.899	1.32365	8.63104e-14
439	―	ENSG00000261625	100.071	1.7786	8.75354e-14
440	PPM1H	ENSG00000111110	40.0055	2.92989	9.29275e-14
441	CACNA1H	ENSG00000196557	225.073	1.27562	9.65493e-14
442	DACT1	ENSG00000165617	15.9717	3.35432	9.97697e-14
443	PLXNA2	ENSG00000076356	112.667	1.55432	1.00368e-13
444	TDO2	ENSG00000151790	17.0463	4.60822	1.0205e-13
445	ENPP5	ENSG00000112796	19.1604	4.27941	1.06493e-13
446	ELMO1	ENSG00000155849	21.4337	6.5553	1.13305e-13
447	IL16	ENSG00000172349	62.7208	2.14068	1.14808e-13
448	CD68	ENSG00000129226	1007.4	0.89345	1.18581e-13
449	KCNA3	ENSG00000177272	24.7737	2.47209	1.26551e-13
450	TRO	ENSG00000067445	372.678	1.09977	1.32281e-13
451	CLXN	ENSG00000034239	45.3496	1.85387	1.33078e-13
452	SNAP25	ENSG00000132639	173.147	2.57999	1.35623e-13
453	LIPG	ENSG00000101670	56.2664	2.07985	1.39349e-13
454	MLLT11	ENSG00000213190	251.202	1.16346	1.47456e-13
455	MCTP1	ENSG00000175471	53.7286	2.26491	1.57658e-13
456	―	ENSG00000258875	15.4343	3.05887	1.75498e-13
457	PPARGC1A	ENSG00000109819	19.1046	5.49087	1.8658e-13
458	SESN3	ENSG00000149212	86.4417	2.92442	2.0539e-13
459	CHST11	ENSG00000171310	57.95	2.11499	2.17845e-13
460	WNT9A	ENSG00000143816	143.268	1.23463	2.37089e-13
461	―	ENSG00000246090	136.92	1.41735	2.735e-13
462	CA12	ENSG00000074410	163.07	1.17633	2.96007e-13
463	IFITM10	ENSG00000244242	31.1722	2.90054	2.98173e-13
464	GBP2	ENSG00000162645	70.3376	1.92453	3.12889e-13
465	GPCPD1	ENSG00000125772	324.711	1.1131	3.26909e-13
466	―	ENSG00000295967	164.234	3.50399	3.28988e-13
467	FBXO15	ENSG00000141665	16.5608	2.81236	3.31161e-13
468	TLR5	ENSG00000187554	15.7427	4.14282	3.35149e-13
469	FAM43A	ENSG00000185112	605.084	0.848516	3.49749e-13
470	RSAD2	ENSG00000134321	149.546	11.0037	3.5394e-13
471	SNX18P12	ENSG00000279718	18.6861	5.97697	3.62484e-13
472	GOLGA8M	ENSG00000188626	62.7592	2.97602	3.86525e-13
473	HEXB	ENSG00000049860	2748.49	1.14649	4.34072e-13
474	CES3	ENSG00000172828	60.1206	3.45295	4.34072e-13
475	FAM20A	ENSG00000108950	329.235	1.16719	4.40033e-13
476	FRG1JP	ENSG00000307942	21.9102	4.08969	4.84895e-13
477	ZC3HAV1	ENSG00000105939	1017.83	1.11534	4.91495e-13
478	RNASE4	ENSG00000258818	139.729	1.65874	4.95652e-13
479	RHOJ	ENSG00000126785	26.3053	2.10303	5.05942e-13
480	―	ENSG00000261786	108.825	1.53135	5.07328e-13
481	ZNF91	ENSG00000167232	76.0861	1.71158	5.09255e-13
482	GAS7	ENSG00000007237	196.634	1.48456	5.32356e-13
483	PTPRE	ENSG00000132334	33.0152	2.35445	5.45773e-13
484	DSG2	ENSG00000046604	87.5575	3.71798	5.68922e-13
485	PGR	ENSG00000082175	18.375	3.4048	6.18709e-13
486	CTBS	ENSG00000117151	297.309	1.47104	6.52443e-13
487	NCAM2	ENSG00000154654	13.3375	3.76472	6.52787e-13
488	ELFN1	ENSG00000225968	202.134	1.27537	6.81453e-13
489	―	ENSG00000293664	87.3251	1.17166	6.82011e-13
490	PBX3	ENSG00000167081	305.244	1.21577	6.91503e-13
491	―	ENSG00000259345	45.9569	1.98933	7.33749e-13
492	STAT1	ENSG00000115415	5249.88	2.41946	7.37769e-13
493	―	ENSG00000290537	17.4298	3.0934	7.62315e-13
494	TRIB2	ENSG00000071575	142.641	1.53069	8.36842e-13
495	GHR	ENSG00000112964	40.4927	3.31226	8.44901e-13
496	GNG4	ENSG00000168243	37.7034	2.41782	8.63272e-13
497	IL4I1	ENSG00000104951	55.3606	2.11103	8.90481e-13
498	DEPDC7	ENSG00000121690	139.817	1.74024	8.90481e-13
499	IP6K3	ENSG00000161896	179.182	0.987221	8.98593e-13
500	PDE6B	ENSG00000133256	14.8168	4.72261	9.16628e-13
501	SLC44A3	ENSG00000143036	33.5523	2.39172	1.0388e-12
502	FYB1	ENSG00000082074	13.7629	5.16414	1.06374e-12
503	RFX8	ENSG00000196460	98.113	1.42415	1.06987e-12
504	FADS1	ENSG00000149485	2951.86	1.30378	1.11491e-12
505	KCNH1	ENSG00000143473	19.3921	5.39202	1.1753e-12
506	SLC22A15	ENSG00000163393	157.934	1.99854	1.18455e-12
507	ITGA10	ENSG00000143127	67.3798	2.07057	1.22451e-12
508	HTR2A	ENSG00000102468	18.9172	6.34379	1.24096e-12
509	ADAMTS19	ENSG00000145808	241.805	2.42593	1.24616e-12
510	C4orf33	ENSG00000151470	50.3122	1.84224	1.36957e-12
511	ENTREP1	ENSG00000135063	14.7222	3.81945	1.84337e-12
512	MKX	ENSG00000150051	110.796	2.69106	1.92029e-12
513	PELI2	ENSG00000139946	28.9052	2.11201	1.94208e-12
514	RASGRF2	ENSG00000113319	441.958	1.17529	1.94717e-12
515	PLEKHH2	ENSG00000152527	209.866	2.04355	2.07776e-12
516	ZSWIM5	ENSG00000162415	61.0049	2.07285	2.12188e-12
517	MOB3B	ENSG00000120162	25.9406	2.82573	2.67647e-12
518	ABCA6	ENSG00000154262	34.1385	2.31374	2.71371e-12
519	STEAP1B	ENSG00000105889	283.113	1.40656	2.76608e-12
520	ERAP2	ENSG00000164308	1244.21	1.31066	2.86195e-12
521	GNG11	ENSG00000127920	1976.42	2.05411	2.88361e-12
522	PTPRO	ENSG00000151490	16.6899	4.23828	2.93129e-12
523	DNAAF11	ENSG00000129295	44.4236	1.63626	3.06958e-12
524	SORCS2	ENSG00000184985	20.1439	2.89291	3.10398e-12
525	MMP10	ENSG00000166670	118.419	1.95273	3.16787e-12
526	―	ENSG00000279333	22.6267	5.38274	3.16787e-12
527	LGALS3BP	ENSG00000108679	3706.2	1.85922	3.24188e-12
528	PTCHD4	ENSG00000244694	105.005	1.46743	3.35491e-12
529	SLC7A11	ENSG00000151012	2876.89	1.73991	3.35912e-12
530	PIK3R3	ENSG00000117461	627.689	1.00617	3.4658e-12
531	CARINH	ENSG00000197536	66.6478	1.61407	3.58904e-12
532	KLF8	ENSG00000102349	127.239	1.51061	3.60946e-12
533	ID2	ENSG00000115738	65.8087	1.55651	3.61229e-12
534	GRIA4	ENSG00000152578	12.226	3.99917	3.64256e-12
535	MAMDC2	ENSG00000165072	295.839	2.63221	3.75574e-12
536	PPP4R4	ENSG00000119698	24.5413	4.79661	4.30417e-12
537	AMOT	ENSG00000126016	46.4251	2.15202	4.55305e-12
538	PGM2L1	ENSG00000165434	118.733	1.7712	4.55733e-12
539	―	ENSG00000262580	105.916	1.24786	4.64314e-12
540	SEMA4D	ENSG00000187764	21.2746	2.12194	4.83946e-12
541	PTGIS	ENSG00000124212	27.198	2.38163	4.89192e-12
542	RORA	ENSG00000069667	41.8642	2.45399	5.61421e-12
543	JAG1	ENSG00000101384	433.338	2.15644	6.68838e-12
544	SLC8A1	ENSG00000183023	229.259	2.02327	6.68838e-12
545	SCARB2	ENSG00000138760	2759.77	0.838122	7.06608e-12
546	SLC41A1	ENSG00000133065	814.22	1.19181	7.92177e-12
547	ATP2B1-AS1	ENSG00000271614	25.5189	2.40685	8.46299e-12
548	SEMA3C	ENSG00000075223	944.574	3.91315	8.68227e-12
549	PTK2B	ENSG00000120899	66.3629	1.41062	8.68227e-12
550	CCDC68	ENSG00000166510	53.0941	2.37323	8.73904e-12
551	EFNB1	ENSG00000090776	891.855	0.870152	8.7887e-12
552	LPCAT2	ENSG00000087253	142.473	2.52666	9.25323e-12
553	CAVIN2	ENSG00000168497	182.993	2.14884	9.26221e-12
554	PER3	ENSG00000049246	70.7875	2.69941	9.44536e-12
555	SRGAP3	ENSG00000196220	44.6995	3.51552	9.61243e-12
556	ARHGEF37	ENSG00000183111	30.7265	2.00378	9.89014e-12
557	TGFBR3	ENSG00000069702	551.192	1.86315	1.0199e-11
558	F8	ENSG00000185010	45.5812	1.89318	1.04174e-11
559	MR1	ENSG00000153029	586.501	1.26245	1.0432e-11
560	FGF7	ENSG00000140285	22.1232	3.88144	1.16959e-11
561	SALL1	ENSG00000103449	468.123	2.13259	1.24582e-11
562	KCNE4	ENSG00000152049	219.221	2.37696	1.47142e-11
563	PHLDA1	ENSG00000139289	2697.92	1.31522	1.51242e-11
564	PLSCR1	ENSG00000188313	192.18	1.89057	1.57777e-11
565	STUM	ENSG00000203685	17.1958	5.69248	1.63578e-11
566	SYT12	ENSG00000173227	14.5139	4.02153	1.73948e-11
567	AGA-DT	ENSG00000250131	33.2627	1.79185	1.74602e-11
568	TIGAR	ENSG00000078237	394.114	1.72125	1.98271e-11
569	GDF7	ENSG00000143869	50.519	3.52475	1.98271e-11
570	NRP2	ENSG00000118257	117.573	1.57451	2.28016e-11
571	CHPT1	ENSG00000111666	383.222	1.32401	2.40898e-11
572	NPNT	ENSG00000168743	23.0292	6.62793	2.43197e-11
573	SCPEP1	ENSG00000121064	878.167	1.37057	2.46362e-11
574	CPZ	ENSG00000109625	851.636	1.65384	2.64841e-11
575	IRX5	ENSG00000176842	107.814	1.15951	2.74898e-11
576	KSR1	ENSG00000141068	163.281	1.57455	2.97618e-11
577	LINC00517	ENSG00000259091	60.6252	1.61952	3.12194e-11
578	SLITRK5	ENSG00000165300	54.8984	2.18926	3.17752e-11
579	C1orf21	ENSG00000116667	230.816	0.906022	3.29314e-11
580	VDR	ENSG00000111424	288.851	0.97332	3.35074e-11
581	LINC01915	ENSG00000265485	12.3075	5.07849	3.38416e-11
582	AKR1C2	ENSG00000151632	77.9082	2.05274	3.39167e-11
583	CYP11A1	ENSG00000140459	21.7181	2.6184	3.4792e-11
584	TNS1	ENSG00000079308	747.831	1.13181	3.94239e-11
585	MPV17L	ENSG00000156968	23.1273	2.30823	4.04931e-11
586	DIRAS2	ENSG00000165023	84.5591	2.87663	4.29463e-11
587	BTG2	ENSG00000159388	548.805	1.31723	4.31333e-11
588	ADCY1	ENSG00000164742	19.8138	2.61704	4.69062e-11
589	TSC22D1	ENSG00000102804	902.921	1.34704	4.89517e-11
590	CEP95	ENSG00000258890	119.484	0.941984	4.96513e-11
591	CPPED1	ENSG00000103381	762.289	0.837916	4.9707e-11
592	PLIN2	ENSG00000147872	1151.11	0.657336	5.29664e-11
593	DSP	ENSG00000096696	95.68	2.06405	5.30805e-11
594	CYB561	ENSG00000008283	1107.74	0.883853	5.35405e-11
595	TRPS1	ENSG00000104447	168.231	1.79907	5.37333e-11
596	PLXNB3	ENSG00000198753	414.529	0.783331	5.44036e-11
597	PCLO	ENSG00000186472	30.1698	2.33029	5.44667e-11
598	KCNB1	ENSG00000158445	11.4843	4.60498	5.90716e-11
599	PAMR1	ENSG00000149090	1872.75	0.805043	6.09808e-11
600	SORBS2	ENSG00000154556	16.1606	5.62093	6.4664e-11
601	OVCH1	ENSG00000187950	14.3664	3.70382	6.55735e-11
602	UVSSA	ENSG00000163945	319.739	0.945313	6.68589e-11
603	XYLT1	ENSG00000103489	181.619	1.73221	7.22554e-11
604	FENDRR	ENSG00000268388	342.687	1.18794	7.22554e-11
605	RRM2B	ENSG00000048392	640.653	2.30886	7.37165e-11
606	PADI2	ENSG00000117115	12.8272	4.77082	7.46807e-11
607	TAFA2	ENSG00000198673	11.1739	4.31312	7.58495e-11
608	CRYAB	ENSG00000109846	1046.15	1.43201	7.69569e-11
609	B3GALNT1	ENSG00000169255	130.844	2.05724	7.74963e-11
610	LINC01133	ENSG00000224259	29.5474	2.11718	7.7657e-11
611	P4HA3	ENSG00000149380	249.951	1.12585	8.01045e-11
612	PTGER1	ENSG00000160951	156.84	2.00596	8.0511e-11
613	COL26A1	ENSG00000160963	46.682	2.19985	8.22792e-11
614	FGR	ENSG00000000938	21.4314	2.57988	8.65737e-11
615	NRSN2-AS1	ENSG00000225377	59.2279	1.2859	8.85732e-11
616	KIAA0408	ENSG00000189367	39.8241	2.00945	8.90462e-11
617	NMNAT2	ENSG00000157064	68.4189	1.94874	8.99411e-11
618	MDM2	ENSG00000135679	1797.84	1.92984	9.28741e-11
619	―	ENSG00000261324	20.9148	3.47586	9.66561e-11
620	SPRY2	ENSG00000136158	626.622	1.71513	1.03957e-10
621	SLC4A4	ENSG00000080493	35.9941	3.06871	1.08222e-10
622	BISPR	ENSG00000282851	12.3515	5.27867	1.08301e-10
623	―	ENSG00000290644	55.7171	2.50331	1.16084e-10
624	RUNX1	ENSG00000159216	561.594	0.861564	1.18251e-10
625	GPR27	ENSG00000170837	11.4499	4.05212	1.24941e-10
626	SOCS3	ENSG00000184557	229.883	1.29534	1.26065e-10
627	―	ENSG00000289384	56.0236	1.55297	1.38334e-10
628	ANK2	ENSG00000145362	236.274	1.99881	1.45181e-10
629	FAR2P2	ENSG00000290596	13.9011	2.89353	1.48319e-10
630	ITGA1	ENSG00000213949	1025.72	1.37816	1.5174e-10
631	FERMT1	ENSG00000101311	85.1842	2.11437	1.53767e-10
632	MSR1	ENSG00000038945	13.0038	4.66127	1.54849e-10
633	C1QTNF2	ENSG00000145861	67.4462	1.60226	1.70677e-10
634	JAKMIP3	ENSG00000188385	15.7271	2.65893	1.76607e-10
635	PLPP5	ENSG00000147535	685.921	0.993791	1.77831e-10
636	ZNF224	ENSG00000267680	166.516	1.41647	1.94347e-10
637	DGKA	ENSG00000065357	1705.94	0.881324	1.97946e-10
638	ASXL3	ENSG00000141431	16.7029	2.22619	2.00341e-10
639	SLC16A14	ENSG00000163053	26.1534	2.76849	2.18614e-10
640	―	ENSG00000290792	67.0261	2.55417	2.19554e-10
641	ADAM23	ENSG00000114948	248.603	1.04203	2.26256e-10
642	PAPPA	ENSG00000182752	636.673	2.22011	2.33323e-10
643	SLC1A2	ENSG00000110436	37.0433	1.88868	2.45983e-10
644	CCDC30	ENSG00000186409	25.1852	1.84328	2.45983e-10
645	―	ENSG00000288018	19.8064	2.20098	2.56848e-10
646	MANCR	ENSG00000231298	17.0763	2.31765	2.63638e-10
647	ACE	ENSG00000159640	893.044	0.880217	2.66799e-10
648	UNC13A	ENSG00000130477	10.8989	3.42374	2.67551e-10
649	STBD1	ENSG00000118804	282.988	0.961493	2.91203e-10
650	SIAE	ENSG00000110013	528.117	1.27322	2.92657e-10
651	SLC25A4	ENSG00000151729	201.625	0.874899	2.98382e-10
652	GALNT5	ENSG00000136542	1925.39	1.577	3.0571e-10
653	NDUFAF6	ENSG00000156170	141.953	1.10548	3.0571e-10
654	ABCA3	ENSG00000167972	33.0357	1.70537	3.14418e-10
655	PPP1R14A	ENSG00000167641	17.8958	2.18269	3.26568e-10
656	MIR3659HG	ENSG00000224592	15.0561	3.00838	3.33852e-10
657	GL000194.1	ENSG00000277400	94.5883	1.53209	3.33852e-10
658	IFI16	ENSG00000163565	1052.55	1.18399	3.35205e-10
659	PBX1	ENSG00000185630	598.41	1.43178	3.41906e-10
660	GIMAP2	ENSG00000106560	23.985	2.84003	3.43517e-10
661	MAX	ENSG00000125952	740.272	0.53463	3.61843e-10
662	DEPP1	ENSG00000165507	19.3805	2.97697	3.76108e-10
663	GAL3ST4	ENSG00000197093	326.71	1.48361	3.88071e-10
664	APOL3	ENSG00000128284	137.71	1.6323	3.96803e-10
665	PPFIA2	ENSG00000139220	12.1693	4.04102	4.02036e-10
666	SEC61A2	ENSG00000065665	164.409	0.929658	4.03121e-10
667	TTC39B	ENSG00000155158	113.087	1.54917	4.45793e-10
668	ACVR2A	ENSG00000121989	95.2947	1.8622	4.5617e-10
669	CDO1	ENSG00000129596	13.4981	2.89126	4.5617e-10
670	ZFPM2-AS1	ENSG00000251003	16.6709	3.17351	4.56345e-10
671	LRRC37B	ENSG00000185158	56.7413	1.41989	4.63327e-10
672	ANKRD6	ENSG00000135299	13.6733	2.90909	4.68559e-10
673	CYP1B1	ENSG00000138061	836.296	2.91316	4.77931e-10
674	PNPT1	ENSG00000138035	230.559	1.61593	4.90625e-10
675	GAD1	ENSG00000128683	12.0672	4.20341	5.01784e-10
676	CYBRD1	ENSG00000071967	2621.74	2.26691	5.05792e-10
677	PLAC8	ENSG00000145287	16.1733	2.41141	5.05792e-10
678	CBLN2	ENSG00000141668	12.483	3.31036	5.53899e-10
679	CRLF1	ENSG00000006016	37.9246	2.00456	5.5922e-10
680	CHD9NB	ENSG00000277639	25.8728	1.90588	5.72991e-10
681	POSTN	ENSG00000133110	205.796	1.91911	5.91346e-10
682	RAB29	ENSG00000117280	335.538	1.08334	5.95964e-10
683	TM7SF3	ENSG00000064115	1492.13	0.938442	6.0038e-10
684	KCNIP2	ENSG00000120049	38.9569	1.66898	6.28617e-10
685	NME5	ENSG00000112981	27.019	2.12157	6.29543e-10
686	IL1RN	ENSG00000136689	10.4637	4.82024	6.29884e-10
687	TRIM5	ENSG00000132256	427.068	1.67232	7.17271e-10
688	LINC01705	ENSG00000232679	30.8111	2.00892	7.19794e-10
689	HSD17B11	ENSG00000198189	159.157	1.03602	7.35353e-10
690	DHRS2	ENSG00000100867	22.3971	5.73892	7.39129e-10
691	THNSL2	ENSG00000144115	54.1609	2.43607	7.40796e-10
692	PDK4	ENSG00000004799	25.7972	7.22444	7.43638e-10
693	SETBP1	ENSG00000152217	59.649	1.71144	7.70352e-10
694	COL4A6	ENSG00000197565	172.421	1.8739	7.89522e-10
695	GARNL3	ENSG00000136895	31.7812	1.66068	8.19463e-10
696	ZCCHC2	ENSG00000141664	124.261	1.91458	8.30506e-10
697	―	ENSG00000286379	62.9044	1.43163	8.44111e-10
698	SHISAL1	ENSG00000138944	29.208	1.92204	8.57664e-10
699	RIMBP3	ENSG00000275793	18.9763	2.46599	8.75414e-10
700	CD302	ENSG00000241399	131.489	1.89195	8.85618e-10
701	ABCG2	ENSG00000118777	57.8034	2.18345	9.00158e-10
702	KLF11	ENSG00000172059	140.196	2.04466	9.07518e-10
703	GYPE	ENSG00000197465	22.8958	1.80076	9.14362e-10
704	SRPX	ENSG00000101955	870.398	0.487576	9.43563e-10
705	HOXD1	ENSG00000128645	16.7806	2.84023	9.54767e-10
706	―	ENSG00000286190	701.549	1.15081	9.5584e-10
707	―	ENSG00000248994	17.0332	2.31005	9.71678e-10
708	H4C8	ENSG00000158406	101.062	1.61616	9.77949e-10
709	ZNF483	ENSG00000173258	35.0386	2.53034	1.03309e-09
710	MVB12B	ENSG00000196814	147.493	0.940418	1.03956e-09
711	STMN2	ENSG00000104435	10.294	3.31232	1.04794e-09
712	SHFL	ENSG00000130813	1105.47	1.31343	1.05674e-09
713	B4GALT6	ENSG00000118276	56.483	2.70338	1.06327e-09
714	GL000008.2	ENSG00000296775	24.9391	7.77996	1.18982e-09
715	XKRX	ENSG00000182489	18.805	2.56161	1.19362e-09
716	TAFA5	ENSG00000219438	10.262	5.06967	1.19544e-09
717	FZD1	ENSG00000157240	208.241	1.54223	1.21801e-09
718	GPR78	ENSG00000155269	14.3379	2.98891	1.22198e-09
719	SCN3B	ENSG00000166257	17.4158	3.24599	1.24219e-09
720	SHISA3	ENSG00000178343	14.8801	6.47031	1.29386e-09
721	TRAM1L1	ENSG00000174599	36.705	2.0556	1.3218e-09
722	GDA	ENSG00000119125	46.2366	1.49706	1.33263e-09
723	RNF114	ENSG00000124226	1247.4	0.731418	1.35525e-09
724	EPB41L1	ENSG00000088367	405.126	0.816674	1.37597e-09
725	ROR2	ENSG00000169071	136.522	1.01547	1.37825e-09
726	TRIM67	ENSG00000119283	14.1196	6.43295	1.40213e-09
727	LURAP1L	ENSG00000153714	317.32	1.16461	1.4949e-09
728	CRYM	ENSG00000103316	11.3839	3.37031	1.54403e-09
729	NOVA1	ENSG00000139910	171.69	1.17026	1.65874e-09
730	IFRD1	ENSG00000006652	206.513	1.41733	1.69182e-09
731	CDS1	ENSG00000163624	10.2701	4.97695	1.78814e-09
732	SNHG14	ENSG00000224078	616.832	1.97436	1.83848e-09
733	ISG15	ENSG00000187608	1307.56	3.08475	1.95192e-09
734	SHC4	ENSG00000185634	13.0771	2.83846	1.95996e-09
735	SBSPON	ENSG00000164764	12.8363	3.20793	2.02963e-09
736	ETS2	ENSG00000157557	1168.49	1.18677	2.14988e-09
737	B4GALNT3	ENSG00000139044	10.6706	5.46456	2.23766e-09
738	PIK3R1	ENSG00000145675	381.04	2.0534	2.3183e-09
739	KI270751.1	ENSG00000303867	22.4105	7.60902	2.35459e-09
740	BATF3	ENSG00000123685	36.4339	1.97056	2.41364e-09
741	SEC14L4	ENSG00000133488	14.6425	2.9814	2.43975e-09
742	ADAMTS19-AS1	ENSG00000249421	16.928	2.19877	2.43975e-09
743	RAP1GAP2	ENSG00000132359	171.757	1.13208	2.4779e-09
744	CHROMR	ENSG00000223960	122.796	1.72212	2.51072e-09
745	LINC00174	ENSG00000179406	137.427	1.45862	2.52014e-09
746	XPNPEP2	ENSG00000122121	24.7094	2.09769	2.59355e-09
747	EFEMP1	ENSG00000115380	1684.26	1.38614	2.66401e-09
748	FLRT2	ENSG00000185070	372.863	1.08284	2.6883e-09
749	HAS2	ENSG00000170961	25.9194	2.04327	2.71461e-09
750	ENPP4	ENSG00000001561	16.1538	4.26282	2.7495e-09
751	CYP3A7	ENSG00000160870	12.1434	3.66121	2.82262e-09
752	TFPI	ENSG00000003436	1605.69	1.47077	3.01295e-09
753	PTPN3	ENSG00000070159	95.6998	1.27079	3.03613e-09
754	AOPEP	ENSG00000148120	296.599	1.09092	3.04118e-09
755	LDOC1	ENSG00000182195	742.91	1.40489	3.09331e-09
756	―	ENSG00000250644	252.174	2.1025	3.11263e-09
757	ANO8	ENSG00000074855	96.6855	1.02122	3.38884e-09
758	ASAH1	ENSG00000104763	838.565	1.45546	3.38884e-09
759	AMPH	ENSG00000078053	9.83487	3.09436	3.48719e-09
760	STC1	ENSG00000159167	546.434	1.03279	3.49436e-09
761	E2F7	ENSG00000165891	266.688	2.27213	3.69468e-09
762	KCNF1	ENSG00000162975	13.0896	6.23801	4.04135e-09
763	PRKAR2B	ENSG00000005249	53.3329	3.1256	4.09147e-09
764	OXER1	ENSG00000162881	33.3148	2.35586	4.09147e-09
765	PTGDR2	ENSG00000183134	24.9598	2.21376	4.10335e-09
766	SCUBE2	ENSG00000175356	493.63	0.956174	4.49297e-09
767	IDO1	ENSG00000131203	21.1908	7.59556	4.60003e-09
768	HDAC9	ENSG00000048052	120.07	2.09801	4.64193e-09
769	NAT1	ENSG00000171428	49.4043	1.68987	4.76059e-09
770	TMEM51	ENSG00000171729	141.974	0.978133	4.77429e-09
771	―	ENSG00000286050	12.1474	6.19418	4.77429e-09
772	ADSS1	ENSG00000185100	55.2309	1.31821	5.09038e-09
773	FAM66B	ENSG00000215374	24.7872	2.38998	5.12279e-09
774	CDHR3	ENSG00000128536	49.6821	1.23713	5.44968e-09
775	TENM2	ENSG00000145934	131.611	2.94749	5.44968e-09
776	SMTNL1	ENSG00000214872	11.1686	5.39872	5.51887e-09
777	―	ENSG00000279267	32.2036	2.0232	5.5568e-09
778	NETO1-DT	ENSG00000263958	10.2347	5.46134	5.55786e-09
779	MACROH2A2	ENSG00000099284	80.9277	1.24025	5.64188e-09
780	SGIP1	ENSG00000118473	1140.21	1.21826	5.99492e-09
781	TUSC1	ENSG00000198680	108.877	1.04702	6.27206e-09
782	TCEA3	ENSG00000204219	365.262	1.40236	6.57566e-09
783	PTGFR	ENSG00000122420	55.0373	2.60892	6.98694e-09
784	ATL1	ENSG00000198513	226.629	1.19236	7.16138e-09
785	KCNJ5-AS1	ENSG00000174370	47.6141	1.61003	7.35095e-09
786	TFCP2L1	ENSG00000115112	8.53037	4.20679	7.5004e-09
787	CDKL2	ENSG00000138769	18.4936	2.01075	7.54636e-09
788	RUNDC3B	ENSG00000105784	15.4454	3.99387	7.55553e-09
789	PTPRU	ENSG00000060656	745.879	0.913803	7.80926e-09
790	TMTC1	ENSG00000133687	2215.01	1.78511	8.06519e-09
791	ZNF618	ENSG00000157657	275.893	1.17446	8.20143e-09
792	CDC14B	ENSG00000081377	273.535	1.33689	8.29191e-09
793	PATL2	ENSG00000229474	12.7975	3.50055	8.48969e-09
794	SLC9A9	ENSG00000181804	123.878	0.926322	8.5219e-09
795	PROS1	ENSG00000184500	228.539	1.14794	9.22608e-09
796	CABCOCO1	ENSG00000183346	21.5888	1.91446	9.25767e-09
797	―	ENSG00000291094	37.0011	1.64919	9.342e-09
798	CYP2U1	ENSG00000155016	286.732	1.38715	9.35107e-09
799	NPAS3	ENSG00000151322	13.7423	6.15535	1.01613e-08
800	MAF	ENSG00000178573	17.1847	2.32598	1.10708e-08
801	NFIL3	ENSG00000165030	233.378	1.36174	1.2315e-08
802	PRKY	ENSG00000293442	252.941	0.756882	1.28117e-08
803	CEND1	ENSG00000184524	67.5923	2.00219	1.29951e-08
804	TMX4	ENSG00000125827	723.646	1.1723	1.32661e-08
805	KANK1	ENSG00000107104	606.408	1.50193	1.36659e-08
806	RNF144A	ENSG00000151692	69.9449	1.80655	1.36659e-08
807	FGD4	ENSG00000139132	84.6745	2.21681	1.37239e-08
808	PRKG2	ENSG00000138669	9.28222	5.3511	1.53456e-08
809	LINC01291	ENSG00000204792	10.3932	3.59414	1.56073e-08
810	HYDIN2	ENSG00000276975	19.7667	2.91925	1.56315e-08
811	NHLRC3	ENSG00000188811	229.067	1.36765	1.59948e-08
812	―	ENSG00000297027	12.3369	3.10846	1.62742e-08
813	BIRC3	ENSG00000023445	217.302	1.77211	1.63258e-08
814	PARD3B	ENSG00000116117	445.442	1.37574	1.7284e-08
815	TOR1B	ENSG00000136816	805.866	0.953275	1.76372e-08
816	CIT	ENSG00000122966	606.248	1.12324	1.87187e-08
817	NIPAL3	ENSG00000001461	1872.71	0.900871	1.8769e-08
818	RUFY3	ENSG00000018189	398.554	0.768183	1.91525e-08
819	CPXM1	ENSG00000088882	225.172	1.69868	1.95082e-08
820	CCDC146	ENSG00000135205	29.3714	1.48402	1.95783e-08
821	PCDHB13	ENSG00000187372	17.6769	3.04089	1.98215e-08
822	MAP3K8	ENSG00000107968	15.1426	2.30859	2.02316e-08
823	KALRN	ENSG00000160145	22.5336	1.87012	2.02759e-08
824	ID4	ENSG00000172201	8.94678	3.4977	2.0743e-08
825	IL22RA1	ENSG00000142677	8.48525	4.71307	2.07589e-08
826	CSMD3	ENSG00000164796	29.0225	8.63847	2.08416e-08
827	DLL1	ENSG00000198719	17.3739	2.2381	2.10234e-08
828	FAM169A	ENSG00000198780	11.4675	3.14171	2.10456e-08
[truncated: 3,828 more rows]

## Sheet: YvsO(O↓)
	Supplementary Table S4F.
[truncated: 4,528 more rows]
