# Supplementary material
Source: publisher site journal article supplement (doi:10.18632/aging.206371)
Supplement: Supplementary file 3 [file aging-v18i1-206371-supplementary-material-SD5.xlsx]

## Sheet: YvsM(M↑)
	Supplementary Table 5. Common DEGs identified by both workflows (padj < 0.05).
			Portable Pipeline		Command-line
	Gene name	Ensembl ID	log2FC	padj	log2FC	padj
1	CFH	ENSG00000000971	1.6012	0.00471634	1.0762	3.67e-09
2	PDK2	ENSG00000005882	0.604898	0.04321	0.489862	0.0409189
3	TMEM98	ENSG00000006042	0.455566	0.00753764	0.346811	0.0118895
4	HOXB13	ENSG00000011028	4.82741	0.00161903	0.619854	0.00115528
5	AGA	ENSG00000038002	0.94169	0.00465637	0.928424	4.89e-07
6	TRO	ENSG00000067445	2.50981	0.0071423	1.53241	2.53e-25
7	GPR137B	ENSG00000077585	1.29862	0.0392608	0.741221	0.0121013
8	HSD17B2	ENSG00000086696	2.44823	2.63175e-05	2.35915	4.41e-34
9	EFNB1	ENSG00000090776	1.02346	3.65878e-09	0.934659	8.82e-13
10	SLC22A17	ENSG00000092096	1.00486	0.000438477	1.0624	1.22e-05
11	PIK3IP1	ENSG00000100100	1.94304	0.00262832	1.39055	2.93e-22
12	HSPB7	ENSG00000102760	1.21467	0.024253	0.608976	0.000267401
13	ICAM5	ENSG00000105376	1.35322	0.00250197	0.587158	2.07e-06
14	DNASE2	ENSG00000105612	0.583225	0.00753764	0.498649	0.00758507
15	WNT2	ENSG00000105989	4.07071	0.000252462	3.19425	3.19e-58
16	TMEM176B	ENSG00000106565	4.01248	9.89516e-05	4.82347	1.08e-48
17	PTGDS	ENSG00000107317	3.45832	1.30847e-05	4.07812	1.07e-17
18	VSIR	ENSG00000107738	1.29187	0.00471634	0.723443	0.0318514
19	LGALS3BP	ENSG00000108679	1.14822	0.0071423	1.17044	9.06e-05
20	FAM20A	ENSG00000108950	1.61324	0.00380197	1.90554	1.02e-33
21	CRYAB	ENSG00000109846	1.14376	1.39657e-06	1.31358	1.37e-08
22	MXRA8	ENSG00000111341	0.704816	0.0020492	2.55871	2e-15
23	VNN1	ENSG00000112299	4.5022	0.0114184	2.67346	4.52e-28
24	GNPDA1	ENSG00000113552	0.896077	0.0345507	0.65138	0.000134955
25	EFEMP1	ENSG00000115380	1.59418	0.000383867	1.25776	3.65e-07
26	IGFBP5	ENSG00000115461	3.4868	8.31781e-10	2.94963	2.21e-33
27	TMEM59	ENSG00000116209	0.69847	0.00948412	0.509544	0.00562653
28	KCNC4	ENSG00000116396	1.09435	0.0364629	0.837214	3.56e-05
29	ID3	ENSG00000117318	2.12788	0.000505329	2.24037	3.4e-20
30	CCND2	ENSG00000118971	2.62288	7.89445e-12	2.64381	3.26e-33
31	C1orf198	ENSG00000119280	0.954173	0.00346447	0.867647	8.07e-16
32	PLBD1	ENSG00000121316	3.43517	0.0317665	0.82415	0.00165383
33	FKBP9	ENSG00000122642	2.40614	0.0175477	0.397842	0.0240671
34	HOXC12	ENSG00000123407	4.32687	0.00221971	3.67748	1.08e-48
35	SOX4	ENSG00000124766	1.46151	0.0115914	1.1092	0.00371458
36	EREG	ENSG00000124882	4.11405	0.0424669	2.37943	1.09e-06
37	ID1	ENSG00000125968	1.78016	0.0331397	1.71126	0.00111368
38	METTL25B	ENSG00000128602	1.54287	0.0231141	0.951609	1.56e-05
39	SNRPN	ENSG00000128739	0.589781	0.000284566	0.526307	0.0150178
40	SLC44A2	ENSG00000129353	1.04087	1.11023e-16	0.850991	8.67e-09
41	-	ENSG00000130066	0.55011	0.0240416	0.755671	0.00251621
42	SLC6A8	ENSG00000130821	0.805792	0.0318493	0.462951	0.023007
43	MEGF6	ENSG00000132329	3.39195	0.00151314	1.17953	0.0250402
44	WNT2B	ENSG00000134245	3.21852	0.00482985	2.26256	4.78e-19
45	P2RX4	ENSG00000135124	1.04276	0.0106987	0.563897	0.0337509
46	PCDHGA6	ENSG00000135914	0.808756	0.00106009	2.97783	3.17e-11
47	NIBAN1	ENSG00000135931	12.2767	0.0259092	0.933075	1.95e-22
48	CYB561A3	ENSG00000136542	0.694677	0.00150482	1.5337	4.6e-09
49	ANGPTL2	ENSG00000136859	0.8534	0.0318493	0.857815	4.47e-08
50	TFAP2A	ENSG00000137203	1.18485	0.00799223	0.816874	0.000224415
51	MGARP	ENSG00000137463	1.02242	0.00597717	0.819086	0.0123227
52	SULF1	ENSG00000137573	12.8616	0.0208956	3.93985	5.72e-35
53	PARP9	ENSG00000138496	10.2789	5.9415e-05	0.778655	0.00305094
54	STING1	ENSG00000138760	1.01733	0.022351	0.481493	0.000625395
55	LUM	ENSG00000139329	1.46249	0.00751193	1.29233	0.0003202
56	SMO	ENSG00000143028	4.07092	0.0231141	2.71836	2.52e-57
57	CREG1	ENSG00000143162	1.02351	0.036341	0.814284	0.0005792
58	CORIN	ENSG00000145244	1.98374	0.0059365	1.49107	3.72e-12
59	B4GAT1	ENSG00000146278	0.670469	0.0231141	1.06032	0.00069026
60	IGFBP3	ENSG00000146674	3.81858	0.01468	2.51106	4.15e-48
61	MRC2	ENSG00000146859	0.902758	0.00155922	1.19566	1.11e-13
62	SERPING1	ENSG00000149131	1.43706	3.56107e-07	1.42462	3.08e-11
63	ARMC9	ENSG00000149380	1.06535	0.0243106	1.05565	6.53e-09
64	HTR2B	ENSG00000150051	5.59439	0.000966368	2.36996	4.16e-09
65	CUL7	ENSG00000150281	0.807388	0.022351	0.90113	0.0056873
66	AKR1C2	ENSG00000151632	2.97453	0.0159703	2.12467	2.97e-11
67	JAM2	ENSG00000154721	5.59077	0.00820909	2.67996	1.52e-21
68	MAP3K7CL	ENSG00000156265	0.941599	0.0287348	0.440306	0.00254975
69	UBE2L6	ENSG00000156587	0.631812	0.0071423	0.606852	0.00460066
70	GDPD5	ENSG00000158555	7.20583	0.0346994	1.09641	0.00326733
71	PRAC1	ENSG00000159182	3.61673	0.00210795	5.65437	4.39e-06
72	MGP	ENSG00000159184	4.73868	0.00200506	3.20562	2.62e-09
73	C1R	ENSG00000159403	1.47607	0.0102076	1.64691	2.48e-15
74	SQSTM1	ENSG00000161011	0.657518	0.00859445	0.554113	0.00138281
75	RAMP1	ENSG00000162144	2.81161	0.00150623	0.607619	0.00170801
76	ALPL	ENSG00000162551	2.86657	9.89516e-05	2.48148	1.37e-21
77	SH3BGRL2	ENSG00000162591	10.3808	0.00152454	1.03042	0.000548374
78	NCSTN	ENSG00000162736	0.540324	0.0345507	0.50395	0.000835864
79	LRATD1	ENSG00000162981	0.723359	0.0407244	0.844322	1.25e-05
80	IGFBP7	ENSG00000163453	1.16555	0.0473134	0.706799	1.9e-05
81	PRSS12	ENSG00000164099	1.27564	0.0464019	0.587928	0.000760657
82	F2RL2	ENSG00000164220	2.17627	4.30686e-05	1.73377	1.8e-11
83	OSR2	ENSG00000164920	1.02763	3.83544e-05	1.13505	1.75e-16
84	DIRAS2	ENSG00000165023	6.53993	0.0115914	2.50443	6.49e-08
85	TMEM130	ENSG00000166448	5.16633	0.00253374	1.82962	1.36e-18
86	MFAP4	ENSG00000166482	1.16333	0.0103651	0.876852	3.32e-05
87	ANTXR1	ENSG00000169604	0.967867	0.0340331	0.689486	0.000317245
88	CRTAP	ENSG00000170275	0.49881	9.89516e-05	0.502059	0.00047803
89	SIX2	ENSG00000170577	1.20625	0.0113173	1.0216	1.61e-05
90	CYTL1	ENSG00000170891	2.09322	0.00799223	1.30662	5.02e-06
91	RCAN2	ENSG00000172348	2.00651	0.0099204	1.81537	5.92e-19
92	TSPAN3	ENSG00000172348	0.680111	0.0159703	1.81537	5.92e-19
93	OLR1	ENSG00000173391	11.6447	1.8819e-05	1.47686	3.67e-07
94	P4HA3	ENSG00000173641	1.74527	0.0243004	0.973272	6.15e-05
95	IL20RB	ENSG00000174564	1.24444	0.0297065	0.518123	0.0100294
96	SAT1	ENSG00000174684	1.08999	0.0236988	0.44457	0.0414768
97	FZD4	ENSG00000174804	3.44199	0.0282295	1.62972	8.03e-18
98	SEZ6L2	ENSG00000174938	0.847475	0.0272147	0.909255	0.000564608
99	SLITRK1	ENSG00000178235	3.6116	0.00287377	5.27885	5.94e-29
100	MSC	ENSG00000178860	1.74717	0.000171168	1.73375	3.89e-15
101	GAS1	ENSG00000180447	1.58699	0.00415509	1.40599	0.000267401
102	H2AC6	ENSG00000180573	0.764634	0.036341	0.683087	0.0221583
103	HOXC10	ENSG00000180818	0.478922	0.003221	0.465109	0.00312782
104	SLC9A9	ENSG00000181804	9.24104	0.0259359	0.825964	1.73e-06
105	LDOC1	ENSG00000182195	1.38387	8.71733e-05	1.90056	1.37e-15
106	C1S	ENSG00000182326	1.8074	0.00335044	1.6185	7.45e-30
107	TSPYL2	ENSG00000184205	0.74756	0.0396703	0.546042	0.0469736
108	SYPL2	ENSG00000184584	3.33752	0.0223614	1.05076	7.27e-05
109	RBM43	ENSG00000184898	3.81702	0.010638	1.327	0.00606248
110	FAM43A	ENSG00000185112	0.769593	0.00476159	0.861474	7.55e-13
111	AKR1C3	ENSG00000196139	7.44643	0.0392608	3.03359	3.2e-13
112	LRP10	ENSG00000197324	0.544172	0.00783348	0.440187	0.00308883
113	SMG5	ENSG00000198478	0.47964	0.00152454	2.07456	9.23e-22
114	CARD16	ENSG00000204397	0.976346	0.00482985	1.14553	0.000478038
115	HLA-E	ENSG00000204592	0.578996	0.01468	0.445603	0.0125702
116	HEXA	ENSG00000213614	0.479801	0.00623828	0.536881	0.00056164
117	TM6SF2	ENSG00000213996	2.26572	0.00939443	1.07925	0.00256054
118	CEBPD	ENSG00000221869	0.583962	0.0199142	0.691831	0.000861729
119	ARHGEF25	ENSG00000240771	0.829031	0.0319075	0.585368	1.63e-05
120	DDOST	ENSG00000244038	0.309712	0.0287592	0.276321	0.0239904
121	GALNT5	ENSG00000253731	1.69599	0.00125744	1.12652	0.0282924
122	GJA5	ENSG00000265107	4.37107	0.0287348	2.61601	7.48e-44
123	TXNIP	ENSG00000265972	1.46756	1.00429e-06	1.46304	4.72e-23
	This table lists genes that were identified as DEGs in both the Portable Pipeline (Supplementary Table 3) and the command-line workflow (Supplementary Table 4). DEGs were filtered using padj < 0.05. No log2FC threshold was applied. Genes are sorted by Ensembl Gene ID in ascending order.
	A, B: DEGs between young and middle NHDFs. A: upregulated in the middle group; B: downregulated in the middle group.
	C, D: DEGs between middle and old NHDFs. C: upregulated in the old group; D: downregulated in the old group.
	E, F: DEGs between young and old NHDFs. E: upregulated in the old group; F: downregulated in the old group.

## Sheet: YvsM(M↓)
	Supplementary Table S5B.
	Common DEGs identified by both workflows (padj < 0.05).
			Portable Pipeline		Command-line
	Gene name	Ensembl ID	log2FC	padj	log2FC	padj
1	PLAUR	ENSG00000011422	-0.746469	0.00209029	-0.776125	3.24e-05
2	NCAPH2	ENSG00000025770	-0.907406	0.0407244	-1.14455	0.000629875
3	NOP16	ENSG00000048162	-0.858481	0.000425393	-0.955271	3.21e-08
4	ENO1	ENSG00000074800	-0.311655	0.0442313	-0.505544	0.00992254
5	BIRC5	ENSG00000089685	-1.42501	4.99137e-06	-1.67102	3.93e-09
6	PTGS1	ENSG00000095303	-2.71305	0.00939443	-2.19054	7.7e-130
7	ACOT7	ENSG00000097021	-0.559109	0.0384554	-0.663046	0.0080471
8	HNRNPM	ENSG00000099783	-0.550225	0.00210795	-0.650607	2.4e-10
9	RANBP1	ENSG00000099901	-0.802685	7.52909e-08	-0.870069	0.00122488
10	CENPM	ENSG00000100162	-1.12154	0.0294749	-1.43105	4.31e-05
11	MCM5	ENSG00000100297	-0.972627	0.0319075	-1.09313	2.56e-07
12	CDKN3	ENSG00000100526	-1.25785	0.0493	-1.60953	2.5e-15
13	SMS	ENSG00000102172	-0.901407	0.00366065	-1.09915	5.61e-17
14	PBDC1	ENSG00000102390	-0.904574	0.0155932	-0.992351	0.00081217
15	COTL1	ENSG00000103187	-0.682716	0.00356701	-0.813194	5.74e-05
16	RNASEH2A	ENSG00000104889	-0.939053	0.00597717	-1.02432	0.00486557
17	TFPI2	ENSG00000105825	-2.59551	0.00548461	-1.57683	5.65e-09
18	CHCHD2	ENSG00000106153	-0.439789	0.0157398	-0.553774	0.0117151
19	NPTX2	ENSG00000106236	-12.8995	0.000565826	-7.34874	1.79e-39
20	UBE2S	ENSG00000108106	-1.22822	0.0047778	-1.4556	0.00071883
21	KRT18	ENSG00000111057	-1.14004	0.00938425	-1.74176	1.23e-08
22	EBNA1BP2	ENSG00000117395	-1.01988	0.0325476	-0.747253	0.000413364
23	CDC20	ENSG00000117399	-1.60887	3.26932e-08	-1.70975	4.63e-22
24	TGFBI	ENSG00000120708	-0.884415	0.00370087	-1.43786	1.63e-09
25	PLAU	ENSG00000122861	-1.60051	7.52909e-08	-1.89672	2.04e-75
26	MT2A	ENSG00000125148	-1.15912	2.63175e-05	-0.985084	0.00638955
27	BCL2L12	ENSG00000126453	-0.803279	0.0473104	-0.837787	0.0227505
28	PKMYT1	ENSG00000127564	-1.43364	0.00370087	-1.38984	0.000149846
29	PIMREG	ENSG00000129195	-1.7533	0.00358087	-1.74328	1.9e-20
30	TOMM40	ENSG00000130204	-0.676423	0.00607203	-0.848364	0.00035046
31	GINS2	ENSG00000131153	-1.50859	0.00370087	-1.48917	7.84e-07
32	SNRPA1	ENSG00000131876	-0.779515	0.00231867	-0.817243	7.39e-10
33	EIF5A	ENSG00000132507	-0.526654	0.0168539	-0.724483	0.0201962
34	NES	ENSG00000132688	-0.788418	0.0346994	-1.04518	0.000730583
35	CCNB1	ENSG00000134057	-1.09456	0.00573113	-1.33924	1.01e-18
36	FST	ENSG00000134363	-1.8653	0.0282901	-1.24878	7.42e-09
37	CCT7	ENSG00000135624	-0.481178	0.00048131	-0.681168	0.000120583
38	ANP32B	ENSG00000136938	-0.540663	0.00831446	-0.641468	0.0140494
39	TUBB2A	ENSG00000137267	-0.613169	0.00588305	-0.636565	0.00020617
40	TUBB2B	ENSG00000137285	-0.613169	0.00588305	-1.12095	0.0125704
41	CRABP2	ENSG00000143320	-1.55775	0.000171168	-1.22153	8.64e-08
42	SFRP2	ENSG00000145423	-6.41215	2.35007e-05	-7.13795	1.71e-23
43	NRGN	ENSG00000154146	-3.92125	0.00852383	-2.4295	2.01e-06
44	GTF3C6	ENSG00000155115	-0.485209	0.0291795	-0.6533	0.00673259
45	LY6K	ENSG00000160886	-2.35777	3.50589e-05	-2.28472	7.73e-12
46	ITGA5	ENSG00000161638	-0.333409	0.0184539	-0.420206	0.0202585
47	EIF4A1	ENSG00000161960	-0.405967	0.000505329	-0.571377	0.00825427
48	HMGB2	ENSG00000164104	-1.30301	0.0118786	-1.38736	1.09e-07
49	PTTG1	ENSG00000164611	-1.28872	0.000814006	-1.58314	1.02e-07
50	FABP5	ENSG00000164687	-1.62263	7.92505e-06	-1.36721	5.03e-05
51	ILK	ENSG00000166333	-0.49495	0.0236988	-0.587058	0.00798598
52	MCM7	ENSG00000166508	-1.1029	0.00753764	-1.18991	9.56e-06
53	PLK1	ENSG00000166851	-1.51197	0.0346994	-1.38197	3.36e-10
54	TUBA1C	ENSG00000167553	-0.73331	0.022351	-0.812668	1.79e-15
55	TK1	ENSG00000167900	-1.23329	0.000278345	-1.31997	2.4e-06
56	DTYMK	ENSG00000168393	-0.801197	0.00608411	-0.935452	0.00879984
57	STIP1	ENSG00000168439	-0.508176	0.004024	-0.683429	0.000619677
58	FEN1	ENSG00000168496	-0.887459	0.0120568	-0.997804	2.89e-10
59	STXBP6	ENSG00000168952	-2.26618	0.0183259	-1.87091	7.84e-26
60	ADRB2	ENSG00000169252	-2.42041	0.0182515	-2.07071	6.06e-09
61	CXCL8	ENSG00000169429	-1.96462	0.032426	-2.02304	2.26e-05
62	PA2G4	ENSG00000170515	-0.478378	0.0196507	-0.587313	0.000663524
63	RRM2	ENSG00000171848	-1.428	0.000129745	-1.54707	2.11e-25
64	CKS1B	ENSG00000173207	-0.840007	0.000296716	-1.0299	0.000143787
65	UBE2C	ENSG00000175063	-1.64287	4.63088e-10	-1.69394	5.36e-21
66	LMNB2	ENSG00000176619	-0.539876	0.0141139	-0.622571	1.15e-11
67	TYMS	ENSG00000176890	-0.901293	0.00640641	-1.0465	1.08e-21
68	APOBEC3B	ENSG00000179750	-1.35956	0.0426713	-1.38884	1.26e-16
69	DCTPP1	ENSG00000179958	-0.616531	0.00939443	-0.701229	0.00302604
70	CRIP2	ENSG00000182809	-1.28433	0.00062177	-1.11865	0.00582994
71	ALYREF	ENSG00000183684	-0.669884	0.00209029	-0.766099	0.00324127
72	CCDC137	ENSG00000185298	-0.767042	0.0284282	-0.863666	0.0121842
73	S100A3	ENSG00000188015	-1.55612	0.0340331	-1.3729	0.00122508
74	NOC2L	ENSG00000188976	-0.782266	0.0338529	-0.830353	0.0156293
75	PLAC9	ENSG00000189129	-1.63591	0.00232397	-1.7814	0.00391724
76	TUBB	ENSG00000196230	-0.8589	0.00369714	-0.648582	9.36e-05
77	XRCC6	ENSG00000196419	-0.402071	0.0346994	-0.568607	0.00271525
78	PNP	ENSG00000198805	-0.99081	0.00225084	-1.07636	9.44e-10
79	HBA1	ENSG00000206172	-2.59228	0.00386822	-3.17566	2.35e-05
80	CLIC1	ENSG00000213719	-0.479571	0.00231867	-0.548337	0.00723101
81	INMT	ENSG00000241644	-2.05352	0.0167178	-1.82482	3.82e-07
82	FOXD1	ENSG00000251493	-1.22851	0.0370168	-1.31451	5.34e-09
83	BOP1	ENSG00000261236	-0.917538	0.0292905	-1.4175	0.00116466

## Sheet: MvsO(O↑)
	Supplementary Table S5C.
	Common DEGs identified by both workflows (padj < 0.05).
			Portable Pipeline		Command-line
	Gene name	Ensembl ID	log2FC	padj	log2FC	padj
1	LAP3	ENSG00000002549	1.49078	0.00138668	1.52981	2.2566e-24
2	TMEM176A	ENSG00000002933	2.32365	0.0143553	2.31881	1.08278e-15
3	TFPI	ENSG00000003436	1.10371	0.0490908	0.91547	0.000537495
4	CYB561	ENSG00000008283	0.748029	0.0339099	0.604711	1.51674e-05
5	ETV7	ENSG00000010030	3.4989	0.00493058	2.0556	3.8717e-10
6	PLAUR	ENSG00000011422	0.988026	0.000809729	0.522692	0.00527521
7	HGF	ENSG00000019991	2.77816	0.000299335	2.63018	2.24737e-13
8	RAB27B	ENSG00000041353	7.38248	4.15576e-06	4.39672	3.93647e-25
9	RIPOR3	ENSG00000042062	9.73395	0.0123632	1.21222	1.41036e-12
10	ELN	ENSG00000049540	0.878713	0.0209469	3.40084	2.85786e-70
11	PARP12	ENSG00000059378	2.50846	0.00451266	1.84124	1.22484e-15
12	PTPRU	ENSG00000060656	1.55757	0.00902197	0.707315	1.38792e-05
13	MTHFD2	ENSG00000065911	0.758412	0.0117113	1.4433	1.50192e-09
14	SP100	ENSG00000067066	1.90648	0.042131	1.30453	2.63003e-17
15	TRIP13	ENSG00000071539	1.38348	0.0102193	1.00037	1.23636e-07
16	ALDH3A2	ENSG00000072210	1.35752	0.000972316	1.36567	9.74147e-32
17	HMMR	ENSG00000072571	11.0448	0.00504916	2.25676	6.22484e-13
18	TIPIN	ENSG00000075131	2.05583	0.0155178	1.09132	0.000433943
19	SPAG5	ENSG00000076382	2.82489	0.00238816	1.01232	6.76849e-21
20	PAG1	ENSG00000076641	4.49201	0.0126391	3.08892	2.67715e-32
21	UBE2T	ENSG00000077152	1.37232	4.52664e-07	1.13082	3.19218e-08
22	APBB1IP	ENSG00000077420	11.9689	0.000236543	2.789	5.23217e-44
23	TIGAR	ENSG00000078237	1.15422	0.0407228	1.28723	9.51889e-07
24	NDC80	ENSG00000080986	2.3514	0.0411173	1.1299	0.000526738
25	MPP4	ENSG00000082126	10.186	0.0160318	1.95343	5.27888e-15
26	EPDR1	ENSG00000086289	2.92947	0.000210819	2.85829	8.41923e-39
27	LPCAT2	ENSG00000087253	5.45222	6.40862e-07	2.28646	6.16867e-10
28	TPX2	ENSG00000088325	1.36374	0.00480938	0.72027	4.29421e-15
29	EBF4	ENSG00000088881	5.53547	1.16523e-05	2.43052	7.53008e-17
30	SNX5	ENSG00000089006	0.922336	0.000994323	0.650777	6.91968e-06
31	OAS1	ENSG00000089127	8.63831	0.000141982	7.00148	2.79732e-52
32	ORC6	ENSG00000091651	2.5226	0.000509606	0.958179	2.60644e-05
33	HAUS4	ENSG00000092036	0.854811	0.000120405	0.93672	6.86981e-07
34	CDC6	ENSG00000094804	1.8605	0.0445879	0.816061	1.1653e-09
35	PTGS1	ENSG00000095303	3.50053	8.57769e-07	2.45202	4.63104e-166
36	TBC1D2	ENSG00000095383	1.06181	8.23697e-05	0.774732	8.92383e-05
37	TSPAN15	ENSG00000099282	2.27704	2.345e-05	1.94139	6.08393e-20
38	HSD3B7	ENSG00000099377	1.02935	0.00580288	0.667935	0.0124311
39	CDKN3	ENSG00000100526	1.15083	0.0139942	1.01342	1.16118e-06
40	PSMA3	ENSG00000100567	0.624485	0.0464377	0.57563	0.0106006
41	DHRS7	ENSG00000100612	0.995991	2.97699e-05	0.846962	7.42044e-15
42	REC8	ENSG00000100918	2.2782	7.44814e-05	1.27714	4.62042e-10
43	PROCR	ENSG00000101000	0.97133	0.000180257	0.596669	0.00050099
44	CD40	ENSG00000101017	2.27041	0.0113403	0.715375	0.0279416
45	ISM1	ENSG00000101230	12.0912	1.4217e-07	4.72676	3.18151e-29
46	CPPED1	ENSG00000103381	0.985522	0.0207554	0.869125	6.82511e-12
47	SALL1	ENSG00000103449	2.64601	0.0150223	1.91585	1.62298e-09
48	SYT17	ENSG00000103528	5.29231	2.82677e-05	3.92952	7.74167e-42
49	CTSH	ENSG00000103811	2.55271	2.68278e-09	2.00184	1.49587e-23
50	CPQ	ENSG00000104324	0.967861	0.000996209	0.699706	3.688e-07
51	SH2D4A	ENSG00000104611	1.40751	0.00746588	0.892374	3.00709e-13
52	APLP1	ENSG00000105290	1.73966	0.0336102	0.727738	0.000675796
53	COMP	ENSG00000105664	1.36804	0.0418541	4.0904	1.6749e-46
54	TFPI2	ENSG00000105825	4.95637	1.23066e-22	5.06989	1.46155e-99
55	PTN	ENSG00000105894	1.98185	5.80385e-05	1.60268	2.41013e-14
56	TSPAN13	ENSG00000106537	1.28844	0.0319916	1.33982	0.000129759
57	TMEM176B	ENSG00000106565	2.43941	0.000997357	1.74935	2.28962e-07
58	MRPL32	ENSG00000106591	0.576774	0.0142182	0.472139	0.00479331
59	ASPN	ENSG00000106819	1.60139	0.0151723	2.35088	2.90093e-13
60	RIGI	ENSG00000107201	4.69333	0.00652598	3.20307	2.31714e-90
61	PHYH	ENSG00000107537	0.869584	0.00667406	0.693443	6.98458e-07
62	ALDH3A1	ENSG00000108602	3.8634	3.20491e-14	3.168	3.72437e-30
63	LGALS3BP	ENSG00000108679	1.21792	0.0234163	0.688784	0.0242933
64	DHX58	ENSG00000108771	1.81157	0.0179182	1.15926	5.95188e-09
65	CPE	ENSG00000109472	1.1677	0.00100886	1.87362	3.4584e-13
66	GRPEL1	ENSG00000109519	0.679662	0.0464377	0.537015	0.000157069
67	SOD3	ENSG00000109610	4.92896	3.2522e-39	4.49582	9.18677e-50
68	DTX4	ENSG00000110042	3.04671	0.0295118	1.84119	8.51849e-19
69	TSPAN11	ENSG00000110900	10.8901	0.00127062	4.73513	8.66762e-115
70	OAS3	ENSG00000111331	6.38566	0.0376763	4.15419	3.96963e-89
71	OAS2	ENSG00000111335	8.62677	9.00823e-09	5.24628	6.95611e-203
72	CDCA3	ENSG00000111665	1.60308	0.0103818	0.580155	0.00888724
73	CHPT1	ENSG00000111666	1.08019	0.0351212	1.04848	1.85007e-07
74	RASGRF2	ENSG00000113319	2.8623	0.014801	1.25792	2.90569e-14
75	LNPEP	ENSG00000113441	10.9622	0.0366847	0.662531	0.0315423
76	STC2	ENSG00000113739	1.61007	1.04543e-05	1.64617	2.46172e-75
77	ADAM23	ENSG00000114948	1.78541	0.00844886	1.30443	6.23491e-16
78	PDE1A	ENSG00000115252	2.60429	0.0117113	2.00402	6.23095e-19
79	IFIH1	ENSG00000115267	4.83577	0.00652598	2.92405	3.65288e-29
80	FANCL	ENSG00000115392	1.86753	0.0329351	1.42719	1.49837e-06
81	STAT1	ENSG00000115415	1.70084	0.0123873	1.75312	5.31106e-07
82	EFHD1	ENSG00000115468	1.37136	0.00576167	2.29641	5.70176e-31
83	KYNU	ENSG00000115919	5.00562	0.021929	3.01944	1.56189e-39
84	ICMT	ENSG00000116237	0.670809	0.0395376	0.264226	0.0187356
85	C1orf21	ENSG00000116667	1.76316	0.0338421	1.12701	3.40841e-17
86	GADD45A	ENSG00000116717	0.833292	0.0219093	0.943241	5.58962e-09
87	CRYZ	ENSG00000116791	2.10556	0.000820092	2.03788	8.25289e-08
88	ID3	ENSG00000117318	1.70325	0.0411173	1.09186	4.78979e-06
89	CDC20	ENSG00000117399	1.05679	0.0063401	0.538501	0.00717351
90	RPA2	ENSG00000117748	0.81789	0.00159516	0.521769	1.15603e-05
91	ECRG4	ENSG00000119147	9.47767	0.0109098	5.344	0.000273955
92	PHF19	ENSG00000119403	1.20577	0.00162224	0.598018	0.000234005
93	ALG2	ENSG00000119523	0.805905	0.0440489	0.734451	0.000800482
94	GPR68	ENSG00000119714	1.16246	0.000300662	0.799477	3.74708e-06
95	CNRIP1	ENSG00000119865	0.664135	0.0473003	0.483288	1.3828e-05
96	IFIT3	ENSG00000119917	3.91121	4.94155e-08	3.451	9.64837e-91
97	IFIT2	ENSG00000119922	3.77009	0.00366434	3.62532	7.46688e-36
98	PLXDC2	ENSG00000120594	0.901521	0.000372244	1.6217	4.41728e-22
99	SOCS2	ENSG00000120833	1.94089	0.0364896	1.74184	3.42245e-18
100	CLU	ENSG00000120885	0.893591	0.00267287	0.620185	0.0285781
101	EPHX2	ENSG00000120915	10.399	7.4722e-08	2.73443	5.93887e-27
102	RNF170	ENSG00000120925	0.946971	0.0243804	0.884726	7.27693e-08
103	CRISPLD1	ENSG00000121005	9.9035	0.0447066	7.83827	4.4553e-14
104	RDH10	ENSG00000121039	1.05077	0.00371373	1.24163	4.81817e-08
105	TRIM25	ENSG00000121060	2.37232	0.047857	1.54234	2.32574e-28
106	SCPEP1	ENSG00000121064	0.948391	0.0233008	0.647214	0.00407396
107	PLBD1	ENSG00000121316	1.99266	0.00254176	2.13967	1.25574e-31
108	FMOD	ENSG00000122176	2.6851	3.49759e-09	2.27606	1.49479e-61
109	INHBA	ENSG00000122641	11.1079	0.0178523	3.24483	2.22998e-28
110	PLAU	ENSG00000122861	1.09975	2.62995e-05	0.895152	3.15828e-17
111	ZWINT	ENSG00000122952	1.43414	0.0103745	0.810055	1.35615e-06
112	CIT	ENSG00000122966	10.5895	0.00426269	1.57321	8.91172e-16
113	CDKN2C	ENSG00000123080	1.11983	0.000761504	0.692296	2.19151e-06
114	IL13RA2	ENSG00000123496	14.029	3.03535e-08	6.20047	1.17578e-153
115	RAB38	ENSG00000123892	2.79656	3.89176e-08	2.32882	1.09623e-36
116	ZNFX1	ENSG00000124201	1.96333	0.0252143	1.10079	1.20721e-13
117	BMP4	ENSG00000125378	2.86837	2.85161e-23	2.40785	5.01271e-48
118	BMP2	ENSG00000125845	2.58728	5.11212e-06	2.38904	3.43092e-30
119	NR1D1	ENSG00000126368	1.67742	0.00580047	1.6342	1.78784e-14
120	IFI6	ENSG00000126709	4.57935	1.81745e-12	4.26477	5.23225e-39
121	HSPA2	ENSG00000126803	1.33219	0.00697533	0.735064	6.36391e-06
122	HP1BP3	ENSG00000127483	0.934717	0.000503175	0.593236	0.0225301
123	GNG11	ENSG00000127920	2.37141	2.70972e-07	2.43699	6.9055e-17
124	SGCE	ENSG00000127990	0.939288	0.00401493	0.788494	0.00107731
125	HOXD1	ENSG00000128645	2.74811	0.0425331	2.56354	2.15699e-09
126	ARHGAP22	ENSG00000128805	1.55031	0.0313428	0.892652	0.000818791
127	CHAC1	ENSG00000128965	1.04801	0.00517477	0.739683	0.0032557
128	BST2	ENSG00000130303	6.96559	1.77051e-22	6.53408	2.09203e-46
129	HELZ2	ENSG00000130589	3.43008	0.00877046	1.99071	3.55493e-31
130	SHFL	ENSG00000130813	1.60774	0.00239332	0.97738	1.18562e-05
131	C1QL1	ENSG00000131094	3.0612	0.00468915	1.02474	0.00781984
132	PSMC3IP	ENSG00000131470	1.80284	0.0313428	0.90987	1.56722e-06
133	TMEM204	ENSG00000131634	1.72028	6.08684e-05	1.25897	1.23522e-06
134	FAAP24	ENSG00000131944	3.16701	0.0497325	0.641901	0.0405306
135	TRIM21	ENSG00000132109	1.24582	0.00571849	0.961948	3.48551e-08
136	TRIM5	ENSG00000132256	1.4742	0.0211035	1.28202	4.22065e-06
137	TRIM22	ENSG00000132274	1.19622	0.0232055	1.15941	0.000660124
138	TMEM128	ENSG00000132406	1.02008	0.0438024	0.909115	0.00189281
139	SLC52A1	ENSG00000132517	2.38522	0.047018	1.29311	3.81309e-05
140	MTSS2	ENSG00000132613	1.09865	0.00115864	0.841671	2.09017e-12
141	SNAP25	ENSG00000132639	2.51299	0.00572893	1.00587	0.00781301
142	PCNA	ENSG00000132646	1.04658	8.17529e-06	0.791447	1.13168e-05
143	SYT11	ENSG00000132718	1.86295	0.00105476	1.43487	4.24649e-33
144	SLC41A1	ENSG00000133065	1.314	0.0210632	0.96095	6.05306e-08
145	EPSTI1	ENSG00000133106	2.91654	0.00778028	2.5568	1.93404e-58
146	POSTN	ENSG00000133110	-0.202549	0.00810312	1.91531	6.00539e-10
147	PDE6B	ENSG00000133256	10.1684	0.000793666	3.28335	1.79439e-13
148	PDE6B	ENSG00000133256	3.32373	0.0296684	3.28335	1.79439e-13
149	BTG1	ENSG00000133639	1.55798	0.00163832	1.67609	1.10625e-10
150	CCNB1	ENSG00000134057	1.28429	3.84386e-06	0.981895	1.05902e-10
151	TMEM106C	ENSG00000134291	0.703708	0.0114446	0.373582	0.0121833
152	RSAD2	ENSG00000134321	12.6927	3.0076e-05	7.98455	1.32683e-56
153	CMPK2	ENSG00000134326	12.5799	1.73925e-05	7.34302	3.24632e-62
154	FST	ENSG00000134363	2.17011	1.64187e-08	2.18395	2.57052e-28
155	GRP	ENSG00000134443	2.04948	0.00918097	1.62062	2.00042e-09
156	CYP2J2	ENSG00000134716	10.1207	0.00469858	2.08663	6.35162e-13
157	SLC43A3	ENSG00000134802	1.66803	0.0142476	0.941704	2.54341e-15
158	ANXA1	ENSG00000135046	0.874685	0.000289722	0.769951	1.15984e-05
159	PSAT1	ENSG00000135069	0.273292	0.0254517	0.994463	4.81693e-05
160	OASL	ENSG00000135114	11.5822	0.000351182	5.58733	1.28621e-33
161	CD36	ENSG00000135218	4.99153	0.00064807	2.58985	2.42417e-16
162	FAIM2	ENSG00000135472	3.47388	0.0135231	2.18358	6.48569e-23
163	KRT7	ENSG00000135480	2.11696	0.00325178	1.18031	0.000386692
164	SP110	ENSG00000135899	1.42263	0.0254517	1.40104	7.31591e-34
165	SERPINE2	ENSG00000135919	2.83376	2.25921e-10	3.16655	7.74072e-62
166	TMBIM1	ENSG00000135926	0.864527	0.0200708	0.481915	0.000269011
167	SPRY2	ENSG00000136158	1.96633	0.000371208	1.95618	1.17234e-13
168	SETDB2	ENSG00000136169	0.892453	0.0313428	0.635079	0.00101321
169	GPNMB	ENSG00000136235	1.34057	0.000293768	1.17455	3.27768e-11
170	CALCOCO2	ENSG00000136436	0.694902	0.0271203	0.510095	7.81982e-06
171	HS6ST1	ENSG00000136720	0.759574	0.00677347	0.404305	0.00184301
172	TOR1B	ENSG00000136816	0.936594	0.0244225	0.656651	0.000210009
173	CCN3	ENSG00000136999	2.92251	0.00213928	2.39831	1.36549e-16
174	GGH	ENSG00000137563	0.941169	0.0151563	0.73602	0.00155926
175	DDX60	ENSG00000137628	4.86236	0.00571849	3.14399	1.40331e-13
176	CASP1	ENSG00000137752	2.29934	3.95803e-07	2.1907	1.22846e-78
177	NUSAP1	ENSG00000137804	1.47959	0.0244929	1.2394	5.00534e-05
178	IFI44	ENSG00000137965	5.87903	0.00021718	3.87107	1.07126e-57
179	CGREF1	ENSG00000138028	4.74125	2.65855e-06	3.29678	1.02705e-31
180	ENTPD1	ENSG00000138185	3.96249	0.00737909	0.971506	1.54147e-08
181	PARP9	ENSG00000138496	2.40636	0.00274555	2.02249	3.56971e-22
182	ARHGAP24	ENSG00000138639	1.65645	0.0216868	1.21167	3.53361e-07
183	HERC5	ENSG00000138646	12.4578	9.43525e-05	4.47506	3.61878e-84
184	FGF2	ENSG00000138685	1.58975	0.00567593	2.02653	1.22512e-13
185	NAAA	ENSG00000138744	1.64192	0.0224974	1.38079	6.89968e-21
186	PHLDA1	ENSG00000139289	1.47216	0.0295118	1.2586	1.52504e-10
187	IMPA2	ENSG00000141401	1.08274	0.000472318	0.742832	1.02143e-06
188	SECTM1	ENSG00000141574	2.56239	5.43119e-05	2.08103	3.71639e-13
189	CACNA1A	ENSG00000141837	8.7031	0.00184286	2.05271	4.53835e-16
190	SLC47A1	ENSG00000142494	11.8349	1.13405e-06	5.51556	9.69729e-77
191	KIF2C	ENSG00000142945	1.28381	0.00977057	0.514373	0.0291388
192	CREG1	ENSG00000143162	1.0249	0.025104	1.14103	2.5725e-08
193	DPT	ENSG00000143196	1.96982	0.0103131	3.98413	9.69219e-57
194	DTL	ENSG00000143476	3.56362	0.0382972	1.26003	3.90754e-14
195	DUSP10	ENSG00000143507	1.13896	0.0127657	1.07245	2.6006e-10
196	WNT9A	ENSG00000143816	3.44792	0.0307672	1.76795	3.22637e-26
197	CALM2	ENSG00000143933	0.919575	0.0127657	0.9868	0.00190822
198	MALL	ENSG00000144063	2.95228	3.91661e-05	3.83819	0.0132421
199	ACKR3	ENSG00000144476	2.41106	0.000605017	4.47836	1.63557e-73
200	SCD5	ENSG00000145284	1.65135	0.0194832	1.76526	5.80312e-14
201	SNCA	ENSG00000145335	1.44032	0.00262936	0.947893	7.89242e-08
202	SFRP2	ENSG00000145423	4.35497	0.000234539	6.36617	2.79758e-19
203	HAPLN1	ENSG00000145681	10.2123	0.00764517	6.43621	2.57747e-28
204	ADAMTS19	ENSG00000145808	4.12349	0.00194051	2.3782	3.01378e-12
205	C1QTNF2	ENSG00000145861	3.38062	1.50423e-05	2.30732	5.22902e-20
206	IGFBP3	ENSG00000146674	0.381281	4.23893e-05	2.03778	8.07401e-35
207	RGS20	ENSG00000147509	3.13382	0.00126524	2.45236	1.81702e-32
208	LACTB2	ENSG00000147592	1.28739	0.034924	1.15211	6.83941e-05
209	STOM	ENSG00000148175	1.87639	1.21328e-05	1.59867	6.31845e-54
210	FADS1	ENSG00000149485	0.954299	0.049183	0.851376	9.13849e-06
211	DUSP15	ENSG00000149599	4.12825	0.000238965	5.06163	2.70025e-14
212	MMP3	ENSG00000149968	4.36815	2.70881e-20	4.71137	2.4506e-190
213	SLC7A11	ENSG00000151012	1.26911	0.030818	1.41923	2.89646e-08
214	TEX30	ENSG00000151287	1.37406	0.00977836	0.902979	0.00061763
215	KCNE4	ENSG00000152049	2.34725	0.000616176	2.57322	1.92632e-13
216	HSPB8	ENSG00000152137	1.4471	0.0148422	1.57092	6.32581e-26
217	HAUS1	ENSG00000152240	0.903316	0.0112138	0.532626	0.00495161
218	TMEM123	ENSG00000152558	1.41175	0.0345818	1.43774	0.000715226
219	IFIT5	ENSG00000152778	1.44397	0.0388907	1.30407	9.76946e-16
220	STK32B	ENSG00000152953	1.59678	0.0155178	0.999118	3.13844e-08
221	CENPH	ENSG00000153044	2.41296	0.0033534	1.67569	2.27981e-08
222	ABI3BP	ENSG00000154175	3.06535	0.0466117	1.99036	1.90846e-06
223	PDE1C	ENSG00000154678	3.82964	6.29549e-05	3.25547	4.41699e-59
224	APCDD1	ENSG00000154856	3.40059	2.85377e-15	2.63665	2.54781e-121
225	KLF10	ENSG00000155090	1.54637	0.034924	1.89395	1.46187e-06
226	SLC25A28	ENSG00000155287	1.0028	0.00525237	0.751408	0.000708446
227	CLIC2	ENSG00000155962	4.84923	0.00334628	4.16506	6.74568e-57
228	MMP16	ENSG00000156103	9.52302	0.0134353	2.3261	1.87543e-12
229	KCNMA1	ENSG00000156113	2.63648	4.00435e-11	2.44464	5.32303e-25
230	UBE2L6	ENSG00000156587	1.1047	0.00877046	0.810413	1.26372e-05
231	FZD1	ENSG00000157240	1.40665	0.0435442	1.52029	1.90887e-09
232	CCNB2	ENSG00000157456	1.21092	7.17118e-05	0.777186	1.51396e-08
233	KCNJ6	ENSG00000157542	5.56124	0.00630202	3.43046	4.56165e-85
234	MX1	ENSG00000157601	5.02827	0.00659831	4.36298	1.09268e-112
235	COLEC12	ENSG00000158270	11.8803	9.82064e-07	4.10898	3.06003e-50
236	H4C8	ENSG00000158406	2.16774	0.00939631	1.47726	1.73978e-08
237	CIART	ENSG00000159208	1.59637	0.000289722	1.74558	6.36949e-19
238	BTG2	ENSG00000159388	0.784653	0.0473003	0.527068	0.0184567
239	PTGER1	ENSG00000160951	3.85381	3.08304e-08	3.18131	5.94465e-25
240	PLPP3	ENSG00000162407	3.28995	1.44099e-07	3.18817	1.78564e-22
241	AK4	ENSG00000162433	10.4007	0.0154358	0.991898	7.99305e-05
242	LAPTM5	ENSG00000162511	10.8067	1.28772e-05	2.93963	6.26023e-22
243	OLFML2B	ENSG00000162745	2.99527	0.00737909	2.12021	1.11776e-36
244	C1orf115	ENSG00000162817	1.08728	0.0146416	0.660237	1.44753e-05
245	OXER1	ENSG00000162881	2.63334	0.00141519	1.8489	1.82537e-06
246	HAAO	ENSG00000162882	1.92381	0.00162939	1.51961	6.50607e-07
247	KCNF1	ENSG00000162975	3.8165	0.0247033	3.82019	1.17285e-15
248	LRATD1	ENSG00000162981	1.56167	0.000256965	1.65519	1.51014e-22
249	IGFBP7	ENSG00000163453	0.708008	0.0122133	0.456927	0.00608472
250	PPM1K	ENSG00000163644	1.7578	0.0260426	1.36438	8.79679e-05
251	HMGB2	ENSG00000164104	1.41818	0.000157693	1.07671	3.09048e-05
252	SAP30	ENSG00000164105	0.885131	0.0294943	0.716178	0.0227903
253	CMBL	ENSG00000164237	0.969004	0.0447158	1.05719	0.000134861
254	TLR3	ENSG00000164342	11.4014	0.00393652	3.45402	3.50716e-28
255	FOXQ1	ENSG00000164379	3.11401	0.000419466	3.1731	9.5945e-44
256	STEAP1	ENSG00000164647	2.07856	0.00279826	1.10129	0.000596917
257	FABP5	ENSG00000164687	2.13269	1.25459e-10	2.06377	6.18689e-12
258	TNFRSF11B	ENSG00000164761	2.00529	0.000994323	1.63707	0.000896103
259	MAMDC2	ENSG00000165072	4.32301	2.84374e-07	3.56374	2.46506e-21
260	LRR1	ENSG00000165501	1.20739	0.0043118	1.0681	0.00248241
261	E2F7	ENSG00000165891	4.90907	9.07635e-05	2.84322	9.08321e-14
262	IFI27	ENSG00000165949	4.76936	0.000256965	3.56829	9.09872e-18
263	CKB	ENSG00000166165	2.91585	2.91464e-16	2.28552	4.92208e-10
264	NETO1	ENSG00000166342	9.73249	1.04543e-05	6.19139	3.50379e-46
265	SEC11C	ENSG00000166562	1.08286	0.00193718	0.875144	6.35e-05
266	MC4R	ENSG00000166603	3.17711	0.039141	2.87951	9.93492e-07
267	B2M	ENSG00000166710	1.12961	0.0178781	0.961904	5.20321e-06
268	PROCA1	ENSG00000167525	9.44118	0.0319646	1.35499	0.000473407
269	GLOD4	ENSG00000167699	0.711258	0.0347965	0.358235	0.0341779
270	MGAT5B	ENSG00000167889	4.30327	0.0302789	1.7235	2.07667e-22
271	VWCE	ENSG00000167992	1.97459	0.00123369	1.14278	0.00133498
272	BATF2	ENSG00000168062	4.03596	0.0382786	2.60293	1.08009e-28
273	PBK	ENSG00000168078	2.54489	2.51066e-05	1.95316	1.18477e-11
274	MLKL	ENSG00000168404	2.32468	0.00122739	1.46995	1.47932e-27
275	CAVIN2	ENSG00000168497	1.88557	0.000514734	1.82064	8.54816e-09
276	LRATD2	ENSG00000168672	2.6053	0.0127389	3.45229	3.13325e-36
277	MAT2A	ENSG00000168906	0.629801	0.0465142	0.556218	0.000468529
278	LGALS9	ENSG00000168961	5.99937	0.00139971	4.10872	2.98511e-27
279	CPT1C	ENSG00000169169	1.56646	0.013665	1.12914	0.000165806
280	CXCL11	ENSG00000169248	5.48441	1.50423e-05	3.22335	1.7335e-24
281	ADRB2	ENSG00000169252	2.36874	0.00973921	2.51819	2.365e-14
282	CXCL8	ENSG00000169429	3.15304	4.94155e-08	2.87471	3.71215e-11
283	TM4SF1	ENSG00000169908	2.72797	0.00263065	2.45653	1.38541e-35
284	HOXD4	ENSG00000170166	2.38364	2.84271e-09	1.80321	3.44848e-19
285	CDK1	ENSG00000170312	1.80055	9.43525e-05	1.65658	9.77394e-10
286	FABP4	ENSG00000170323	3.9884	6.76396e-20	3.23739	4.73109e-31
287	CDH2	ENSG00000170558	1.76325	0.00601036	2.99601	2.57052e-28
288	EMB	ENSG00000170571	12.2861	4.67074e-07	4.32548	4.24407e-51
289	GPR37	ENSG00000170775	3.48701	3.42995e-05	3.09419	1.41489e-24
290	WDR87	ENSG00000171804	6.88171	0.0294312	4.0027	0.00108401
291	RRM2	ENSG00000171848	1.28051	0.000141466	1.02668	8.42871e-12
292	IL17D	ENSG00000172458	2.87304	0.00135931	1.43244	6.3044e-10
293	CES3	ENSG00000172828	10.1204	0.0160318	4.0854	1.77078e-17
294	CES2	ENSG00000172831	0.67656	0.0129015	0.443528	6.23086e-05
295	MRGPRF	ENSG00000172935	0.911259	1.85393e-05	0.534915	0.0108299
296	HPSE	ENSG00000173083	10.2047	0.0193392	2.64302	2.15543e-29
297	COQ2	ENSG00000173085	0.830796	0.0234753	0.531024	0.0114033
298	CKS1B	ENSG00000173207	1.1274	8.40021e-06	0.755304	0.00468579
299	TNFRSF10C	ENSG00000173535	2.19164	0.000130787	0.906287	0.000443752
300	HSPB7	ENSG00000173641	1.3889	0.00307423	0.996075	5.07677e-06
301	UBE2C	ENSG00000175063	1.31541	3.79458e-09	0.73926	0.000129284
302	LPL	ENSG00000175445	12.047	0.000316732	7.90731	6.89633e-36
303	SUGCT	ENSG00000175600	2.21605	1.0275e-12	1.62637	7.77228e-24
304	SFN	ENSG00000175793	3.31372	0.00342921	2.95348	0.000377901
305	SLCO3A1	ENSG00000176463	1.29279	0.00195586	1.17298	1.31822e-26
306	IRX5	ENSG00000176842	1.33749	0.0112472	0.936616	4.03789e-08
307	TYMS	ENSG00000176890	1.32157	1.16624e-07	1.07707	4.90315e-24
308	FZD8	ENSG00000177283	1.00267	0.000316732	2.25851	3.43248e-27
309	CCDC184	ENSG00000177875	3.34134	4.80823e-07	3.5996	6.7335e-48
310	DDX10	ENSG00000178105	2.10312	0.000432192	1.99203	5.65102e-96
311	PARD6G	ENSG00000178184	2.25861	2.23329e-06	1.91639	3.80733e-24
312	POGLUT3	ENSG00000178202	1.59626	0.0411173	1.44842	1.0115e-05
313	SLITRK1	ENSG00000178235	1.90411	4.06696e-05	1.62594	1.80624e-11
314	SHISA3	ENSG00000178343	7.55524	0.000997357	7.48264	5.34506e-09
315	KCTD12	ENSG00000178695	1.99353	0.00432092	2.0293	5.25527e-08
316	RPP25	ENSG00000178718	1.41399	0.000227125	0.927247	0.0032557
317	THBD	ENSG00000178726	6.28068	4.72069e-07	8.53737	1.42828e-21
318	MSC	ENSG00000178860	1.27734	0.00227106	0.729293	0.000780377
319	PCGF5	ENSG00000180628	1.62731	0.0397915	1.47014	9.33936e-11
320	GREM2	ENSG00000180875	4.85395	2.62237e-05	4.33775	9.91449e-70
321	CHRM2	ENSG00000181072	1.49845	0.015931	1.4217	5.60481e-06
322	DDX60L	ENSG00000181381	3.59954	0.025104	2.818	2.62477e-16
323	FAM89A	ENSG00000182118	2.6536	2.01419e-07	2.18164	5.61415e-37
324	C1S	ENSG00000182326	1.09949	0.0320008	0.773127	1.42202e-07
325	SKA2	ENSG00000182628	1.16533	0.0147449	0.786359	0.000335749
326	NDN	ENSG00000182636	1.70177	0.0281119	1.8541	1.10144e-19
327	PAPPA	ENSG00000182752	2.33877	0.0435442	2.32132	3.48637e-11
328	GPC6	ENSG00000183098	11.1728	5.49897e-08	6.45522	3.17528e-135
329	PTGDR2	ENSG00000183134	5.68063	0.0371065	2.96919	1.66265e-14
330	MX2	ENSG00000183486	13.5893	0.0267626	5.17421	7.49826e-103
331	LHFPL6	ENSG00000183722	0.901267	0.0203582	0.621012	0.0184891
332	OLFML1	ENSG00000183801	1.96343	0.000299178	1.17363	3.81954e-12
333	COLEC10	ENSG00000184374	6.80368	9.73843e-12	4.89487	1.93301e-141
334	CEND1	ENSG00000184524	4.45281	5.7595e-09	2.84068	7.98412e-16
335	USP18	ENSG00000184979	5.93919	0.00064807	4.25683	4.95532e-122
336	TNFAIP2	ENSG00000185215	3.09943	0.00223135	0.864542	4.76658e-13
337	TMT1A	ENSG00000185432	1.45175	0.0160531	1.21316	1.08955e-05
338	IRF7	ENSG00000185507	4.81332	0.00471102	2.56811	1.19352e-14
339	IFIT1	ENSG00000185745	5.08981	3.49759e-09	4.58169	6.76419e-103
340	IFITM1	ENSG00000185885	2.8721	0.028205	3.38967	9.11223e-23
341	RTN4RL1	ENSG00000185924	11.6533	1.66778e-05	3.72825	2.0897e-38
342	GPAT2	ENSG00000186281	2.15134	2.79994e-06	1.40243	5.99512e-18
343	PDE2A	ENSG00000186642	2.89967	0.000180257	2.87115	7.24532e-09
344	ISG15	ENSG00000187608	3.73774	2.85548e-07	3.46306	1.42554e-11
345	RAB42	ENSG00000188060	3.73809	0.028855	1.56762	1.57728e-07
346	NCR3LG1	ENSG00000188211	10.5034	0.00337008	1.51721	0.0294692
347	INSC	ENSG00000188487	11.7817	6.80811e-10	6.56449	5.72446e-78
348	PRELP	ENSG00000188783	2.94648	2.68278e-09	2.44216	2.48304e-31
349	FAM47E	ENSG00000189157	1.40745	0.00469858	3.27864	1.72267e-07
350	RFX8	ENSG00000196460	7.27971	5.081e-05	2.16937	3.60983e-27
351	SULF2	ENSG00000196562	1.73037	0.0418541	1.23044	1.94541e-13
352	MMP1	ENSG00000196611	2.6297	0.000513129	2.25888	1.97079e-45
353	GAL3ST4	ENSG00000197093	1.52807	0.0161505	1.02179	3.04492e-05
354	SLC6A17	ENSG00000197106	11.3107	0.00630202	2.27118	2.53162e-24
355	STMN3	ENSG00000197457	1.59858	3.86108e-06	0.729821	1.08024e-06
356	SERPINB2	ENSG00000197632	5.07792	2.62237e-05	4.71469	1.6116e-34
357	ZNF442	ENSG00000198342	2.44482	0.0411173	1.17829	1.88003e-05
358	ITGBL1	ENSG00000198542	1.18769	0.00191633	2.03682	5.45689e-22
359	COPS8	ENSG00000198612	0.814874	0.0239282	0.766138	1.70761e-07
360	TUSC1	ENSG00000198680	1.26236	0.0102747	1.09061	6.58651e-10
361	PNP	ENSG00000198805	1.06814	0.00353203	0.802246	4.57244e-06
362	PRC1	ENSG00000198901	1.28918	0.000307701	0.868336	4.86236e-12
363	KPRP	ENSG00000203786	6.10339	1.89209e-10	5.70287	1.0101e-61
364	GGTA1	ENSG00000204136	5.76627	0.00023622	3.01493	3.11236e-18
365	TCEA3	ENSG00000204219	1.21229	0.00824841	0.572668	0.0353631
366	NALF1	ENSG00000204442	1.88051	0.00493058	1.74862	8.82937e-16
367	KRT40	ENSG00000204889	9.39572	0.021606	6.10896	5.25303e-32
368	ATP10A	ENSG00000206190	1.09808	0.0123873	1.94765	7.81516e-31
369	MLLT11	ENSG00000213190	1.02206	0.0142476	0.940104	2.0529e-09
370	FBXO16	ENSG00000214050	4.52928	0.0336102	1.43402	0.00124852
371	ELFN1	ENSG00000225968	1.30555	0.0072078	0.767183	2.23964e-05
372	TMEM35B	ENSG00000243749	0.816989	0.0070469	0.601884	0.0144436
373	IFITM10	ENSG00000244242	3.15247	0.00736954	3.17399	5.08703e-16
374	RNASE4	ENSG00000258818	0.915942	0.0172293	0.964428	3.57363e-05
375	RPSA	ENSG00000258818	1.75349	0.0173542	0.964428	3.57363e-05
376	CEP95	ENSG00000258890	2.11327	0.0168864	0.5468	0.000126734
377	TXNIP	ENSG00000265972	1.58754	0.000435754	1.56173	1.46581e-27
378	ZNF224	ENSG00000267680	3.21683	0.027768	0.521051	0.0339894
379	H4C14	ENSG00000270882	2.16774	0.00939631	1.69103	1.76827e-05
380	SRXN1	ENSG00000271303	0.863542	0.00334628	0.837279	6.27145e-11
381	CCL5	ENSG00000271503	4.51343	5.36183e-06	4.4625	4.55495e-46
382	H4C9	ENSG00000276180	2.16774	0.00939631	1.53657	0.0487305
383	MYO19	ENSG00000278259	1.31214	0.0129376	0.597339	7.49967e-08

## Sheet: MvsO(O↓)
	Supplementary Table S5D.
	Common DEGs identified by both workflows (padj < 0.05).
			Portable Pipeline		Command-line
	Gene name	Ensembl ID	log2FC	padj	log2FC	padj
1	FUCA2	ENSG00000001036	-0.793818	1.83766e-06	-1.07462	3.60983e-27
2	LASP1	ENSG00000002834	-0.293316	0.0291245	-0.63183	6.88133e-08
3	ARF5	ENSG00000004059	-0.5896	0.0493822	-1.2397	0.000404264
4	TMEM132A	ENSG00000006118	-1.16939	0.00630202	-2.00898	7.14806e-20
5	TEAD3	ENSG00000007866	-0.709678	0.000895199	-1.2327	9.71058e-16
6	PSMB1	ENSG00000008018	-1.0123	3.968e-10	-1.44392	1.26028e-06
7	IL32	ENSG00000008517	-1.72942	0.000289722	-2.46776	3.73162e-14
8	RPS20	ENSG00000008988	-0.500547	0.0419961	-1.10976	7.04009e-06
9	UQCRC1	ENSG00000010256	-0.905106	0.000289722	-1.53561	7.90473e-11
10	NISCH	ENSG00000010322	-0.75374	0.007274	-1.19478	4.4982e-13
11	PRSS3	ENSG00000010438	-9.73088	2.1049e-05	-6.19723	7.27914e-08
12	FYN	ENSG00000010810	-0.844676	0.0290045	-1.0563	2.10372e-19
13	TSPAN9	ENSG00000011105	-1.49483	1.71651e-11	-2.2591	4.64363e-39
14	QPCTL	ENSG00000011478	-0.904948	0.00775752	-1.35425	3.2959e-10
15	CLDN11	ENSG00000013297	-1.42662	0.000273324	-1.83114	4.52881e-20
16	CCDC28A	ENSG00000024862	-1.06303	0.0111068	-1.24739	6.72375e-07
17	B4GALT7	ENSG00000027847	-0.585672	0.0214889	-1.22045	7.01629e-05
18	BAK1	ENSG00000030110	-0.8813	0.00908376	-1.26141	0.000328092
19	CHPF2	ENSG00000033100	-0.460085	0.046941	-1.00222	2.58339e-19
20	CUL7	ENSG00000044090	-1.001	9.89293e-05	-1.46073	6.10752e-28
21	DTNBP1	ENSG00000047579	-0.837758	0.00711478	-1.28248	1.90497e-07
22	MAP4	ENSG00000047849	-0.392737	0.0315689	-0.949862	3.20449e-09
23	SEC61A1	ENSG00000058262	-0.516845	0.000830364	-1.05022	1.51372e-17
24	ACAA1	ENSG00000060971	-0.918322	0.000138901	-1.63983	7.14561e-20
25	EIF4B	ENSG00000063046	-0.485571	0.0369772	-0.740387	3.1032e-07
26	RPL18	ENSG00000063177	-0.630036	0.0378135	-1.28595	0.000198845
27	CNN2	ENSG00000064666	-0.986451	0.000138721	-1.49561	5.29011e-25
28	TRAM2	ENSG00000065308	-0.729636	0.0160318	-0.992775	3.051e-05
29	NDUFB4	ENSG00000065518	-0.642556	0.0203582	-1.10974	4.22057e-08
30	RHOA	ENSG00000067560	-0.380239	0.0436745	-0.84448	5.18203e-19
31	GAL	ENSG00000069482	-3.68389	0.00463786	-4.25316	3.43062e-22
32	RPL31	ENSG00000071082	-0.453171	0.0326289	-1.04173	2.1315e-05
33	PDCD2	ENSG00000071994	-0.927694	0.00043721	-1.00851	1.07601e-15
34	IGF2BP2	ENSG00000073792	-1.2017	0.000690254	-1.52808	2.29393e-26
35	FSCN1	ENSG00000075618	-0.612862	0.0043397	-1.24878	3.50201e-12
36	ACTB	ENSG00000075624	-0.603242	0.00571849	-1.07934	8.7165e-11
37	RAB7A	ENSG00000075785	-0.483938	0.00267287	-0.984402	1.62646e-37
38	CAPZB	ENSG00000077549	-0.404826	0.000371208	-0.811849	3.0331e-06
39	SYNJ2	ENSG00000078269	-4.94421	0.0177572	-1.61122	1.0425e-12
40	MOXD1	ENSG00000079931	-1.00651	0.00196914	-1.48051	1.62776e-19
41	PLOD1	ENSG00000083444	-0.373027	0.0186273	-0.96817	3.22472e-06
42	FTL	ENSG00000087086	-0.872777	0.00651426	-1.56927	1.84739e-11
43	PIGS	ENSG00000087111	-0.662788	0.00279826	-1.16121	7.24316e-34
44	TBX5	ENSG00000089225	-5.40748	1.14286e-05	-2.71981	1.84747e-72
45	PCBP4	ENSG00000090097	-0.964474	0.0363933	-1.7688	9.15447e-12
46	ICAM1	ENSG00000090339	-1.76105	3.40914e-08	-2.58835	6.60128e-149
47	MRPS18A	ENSG00000096080	-0.670763	0.0294649	-1.35464	1.88076e-05
48	HSP90AB1	ENSG00000096384	-0.478511	0.00035608	-0.867578	3.22702e-16
49	GCAT	ENSG00000100116	-1.57424	0.00749929	-1.91365	1.53824e-08
50	MYL9	ENSG00000101335	-1.07771	0.0112472	-2.15729	1.11956e-09
51	RGCC	ENSG00000102760	-1.16116	0.0399519	-2.6001	2.24311e-74
52	SFRP1	ENSG00000104332	-1.37618	0.013377	-1.52647	3.524e-06
53	PLAT	ENSG00000104368	-1.07166	0.00217743	-1.61542	2.94308e-27
54	OAZ1	ENSG00000104904	-0.427055	0.0214889	-0.959754	0.000313929
55	TLE5	ENSG00000104964	-0.538114	0.000178767	-1.09134	4.71701e-06
56	IL27RA	ENSG00000104998	-1.6212	0.000424408	-2.48159	6.59051e-121
57	EBI3	ENSG00000105246	-1.69584	0.0211009	-2.15208	1.46272e-15
58	KDELR1	ENSG00000105438	-0.390024	0.0351346	-0.901744	1.14215e-06
59	RPL18A	ENSG00000105640	-0.709532	0.0107597	-1.46729	4.50058e-06
60	FKBP8	ENSG00000105701	-0.5446	0.0351212	-1.21257	0.000525324
61	MOSPD3	ENSG00000106330	-0.640181	0.0157082	-1.2096	6.86512e-06
62	IMPDH1	ENSG00000106348	-0.607025	0.0183261	-1.21771	0.000202883
63	MEST	ENSG00000106484	-2.94509	0.0351212	-4.598	2.10608e-84
64	PTGDS	ENSG00000107317	-2.33854	0.0189979	-4.49196	3.21892e-22
65	LHPP	ENSG00000107902	-0.838222	0.00580047	-1.44856	1.25537e-08
66	RPL19	ENSG00000108298	-0.522578	0.0247823	-1.14632	0.00012652
67	ICAM2	ENSG00000108622	-9.84047	0.04201	-3.02253	3.04694e-07
68	CCL7	ENSG00000108688	-3.39928	0.000265234	-4.15885	6.2239e-44
69	NHERF1	ENSG00000109062	-0.640769	0.0363933	-1.09215	9.17483e-05
70	RPL34	ENSG00000109475	-0.650683	0.0369549	-1.28645	5.78928e-05
71	SLC15A3	ENSG00000110446	-1.21784	0.0152259	-1.58409	3.07992e-08
72	RPS13	ENSG00000110700	-0.344626	0.0193392	-0.815328	0.000500983
73	RWDD1	ENSG00000111832	-0.682931	0.0344488	-1.01014	4.85822e-07
74	TMEM14C	ENSG00000111843	-0.746857	5.07852e-06	-1.11015	8.2471e-15
75	HDDC2	ENSG00000111906	-0.758759	0.00020819	-0.987889	3.24755e-06
76	PPARD	ENSG00000112033	-0.704465	0.0103131	-1.19531	4.25769e-15
77	MRPL18	ENSG00000112110	-0.624521	0.00564574	-0.913204	1.2836e-08
78	RPS12	ENSG00000112306	-1.18521	9.44367e-20	-1.7032	1.06225e-10
79	RPS12	ENSG00000112306	-1.1801	0.000724431	-1.7032	1.06225e-10
80	SNX3	ENSG00000112335	-0.667717	0.0214889	-0.758757	0.0217448
81	SLC39A7	ENSG00000112473	-0.999417	0.000855463	-1.65845	8.6153e-12
82	PTK7	ENSG00000112655	-1.00223	4.19273e-05	-1.54701	6.29521e-36
83	SRF	ENSG00000112658	-0.746615	0.00440234	-1.12035	2.44846e-17
84	DNPH1	ENSG00000112667	-0.785003	0.0140364	-1.43817	1.16501e-05
85	DUSP22	ENSG00000112679	-0.64132	0.0254786	-1.0693	1.30952e-13
86	COX7A2	ENSG00000112695	-1.48761	0.0473003	-1.3549	2.49484e-09
87	GMDS	ENSG00000112699	-1.28666	1.95605e-05	-1.63469	2.65884e-17
88	DBN1	ENSG00000113758	-1.19483	5.07167e-06	-1.71534	2.36322e-14
89	USP4	ENSG00000114316	-0.562171	0.020741	-1.03875	3.07595e-33
90	GNAI2	ENSG00000114353	-0.783941	2.07896e-05	-1.47726	2.96349e-20
91	TUSC2	ENSG00000114383	-0.524779	0.0490908	-1.16576	1.3253e-09
92	RPL24	ENSG00000114391	-1.20319	0.000601013	-2.05255	5.7027e-12
93	SPCS1	ENSG00000114902	-0.498779	0.0169579	-0.968857	1.37764e-05
94	EEF1B2	ENSG00000114942	-0.43447	0.0411173	-0.89058	0.000133023
95	MOGS	ENSG00000115275	-0.569671	0.00964044	-1.21399	1.44492e-13
96	LOXL3	ENSG00000115318	-2.45679	6.57598e-06	-2.42961	6.43621e-60
97	DOK1	ENSG00000115325	-0.771059	0.0323645	-0.901576	0.0271016
98	QPCT	ENSG00000115828	-0.862802	0.00635606	-1.39457	2.52398e-10
99	RPL22	ENSG00000116251	-0.380138	0.00480938	-0.673788	0.00081172
100	RGS2	ENSG00000116741	-1.08876	0.0464861	-1.87313	7.7555e-08
101	MFAP2	ENSG00000117122	-1.05863	0.00586017	-1.84809	1.46343e-11
102	ECE1	ENSG00000117298	-0.472788	0.00554697	-1.12938	3.61081e-20
103	RAB32	ENSG00000118508	-1.34947	1.68431e-10	-1.58038	3.23534e-19
104	TCF21	ENSG00000118526	-3.07534	0.00262936	-2.62727	1.51926e-22
105	CCDC92	ENSG00000119242	-0.495177	0.0477585	-0.971757	0.000507519
106	MTHFD1L	ENSG00000120254	-0.727068	0.0435442	-0.852877	1.23057e-27
107	TCP1	ENSG00000120438	-0.583412	0.0123873	-0.681495	7.18468e-07
108	RPL21	ENSG00000122026	-0.55294	0.00350672	-0.998621	0.00117024
109	RPL5	ENSG00000122406	-0.409467	0.00426779	-0.885493	3.32236e-10
110	SDC4	ENSG00000124145	-0.745185	0.00144354	-1.44566	4.45465e-21
111	PEPD	ENSG00000124299	-0.380268	0.0208062	-0.767847	1.74368e-08
112	XG	ENSG00000124343	-3.5401	2.28492e-05	-3.56364	1.96991e-47
113	SNRPC	ENSG00000124562	-0.606165	0.00255895	-1.15507	2.70216e-06
114	KLHDC3	ENSG00000124702	-1.1247	0.00392285	-1.94677	5.04236e-11
115	MEA1	ENSG00000124733	-0.683957	0.0315935	-1.2927	4.20804e-06
116	CDKN1A	ENSG00000124762	-0.396921	0.00247014	-0.833099	7.12904e-06
117	SOX4	ENSG00000124766	-1.16632	0.0239282	-1.59913	1.51641e-06
118	EMC3	ENSG00000125037	-0.565487	0.00459563	-1.20518	6.36352e-10
119	SH3TC1	ENSG00000125089	-9.55933	0.00313261	-2.21329	4.43634e-27
120	VASP	ENSG00000125753	-0.652978	0.000118181	-1.12134	5.97783e-14
121	NCLN	ENSG00000125912	-0.475767	0.0294312	-0.980634	0.00310769
122	TMEM115	ENSG00000126062	-0.613113	0.00598964	-1.30158	1.16495e-07
123	TNFRSF19	ENSG00000127863	-3.93783	0.0402457	-3.93249	7.6109e-36
124	RAC2	ENSG00000128340	-2.66515	0.000299178	-2.95974	9.03171e-34
125	KRT17	ENSG00000128422	-1.68364	8.7739e-06	-2.25189	4.10034e-11
126	CPA4	ENSG00000128510	-4.11593	0.0173592	-3.48326	8.30942e-84
127	HOXD10	ENSG00000128710	-1.25653	0.00127503	-0.866225	6.11653e-07
128	HOXD13	ENSG00000128714	-2.73018	0.0247823	-2.6401	1.64272e-14
129	ACKR4	ENSG00000129048	-1.08531	0.0107098	-1.87566	1.60694e-22
130	NECTIN2	ENSG00000130202	-0.507243	0.00599251	-1.10721	0.000300832
131	COLGALT1	ENSG00000130309	-0.358081	0.0123873	-0.865899	1.74614e-08
132	PXDN	ENSG00000130508	-1.27282	0.0152259	-1.90033	3.4629e-19
133	JUND	ENSG00000130522	-0.533608	0.0129015	-1.04749	2.85683e-06
134	LAMA5	ENSG00000130702	-10.7642	0.0232055	-2.89211	1.74976e-67
135	RGN	ENSG00000130988	-10.3195	0.000169079	-1.23148	1.32095e-07
136	ZNF428	ENSG00000131116	-0.703642	0.0141872	-1.46942	2.1608e-05
137	RFTN1	ENSG00000131378	-0.791382	0.0239853	-1.42955	3.80706e-35
138	PDLIM4	ENSG00000131435	-1.04146	0.000175069	-1.85833	4.02885e-14
139	SERPINF1	ENSG00000132386	-1.23148	0.0165979	-2.16704	1.93416e-21
140	FLOT2	ENSG00000132589	-1.0761	0.00150878	-1.36032	3.80075e-06
141	NES	ENSG00000132688	-1.1609	4.72209e-07	-1.53001	2.72589e-08
142	CAMK1	ENSG00000134072	-0.860272	0.0169203	-1.60677	8.35773e-12
143	RPS15A	ENSG00000134419	-0.660592	0.000880796	-1.17035	2.57986e-06
144	RDH5	ENSG00000135437	-1.03843	0.0351356	-1.37163	1.28221e-06
145	SMPD2	ENSG00000135587	-1.5267	0.011133	-1.60897	3.04616e-12
146	ITM2C	ENSG00000135916	-0.72551	0.0276944	-1.30911	1.84692e-19
147	CKAP4	ENSG00000136026	-0.42631	0.0128579	-1.01764	2.19204e-07
148	DRAM1	ENSG00000136048	-0.632633	0.021174	-1.29714	9.43498e-35
149	TTYH3	ENSG00000136295	-0.851359	0.00297463	-1.43764	1.9366e-15
150	RPS6	ENSG00000137154	-0.453708	0.00720198	-0.976623	2.90451e-05
151	TFAP2A	ENSG00000137203	-1.16673	0.000218125	-1.25744	1.9133e-10
152	YIPF3	ENSG00000137207	-0.714492	5.83161e-06	-1.34969	2.57188e-14
153	TMEM14B	ENSG00000137210	-0.791314	2.345e-05	-1.13071	1.13034e-16
154	TUBB2A	ENSG00000137267	-0.636788	0.0237497	-1.44517	6.98373e-22
155	UQCC2	ENSG00000137288	-0.830609	0.0364896	-1.67494	2.77058e-05
156	HMGA1	ENSG00000137309	-1.28383	8.23697e-05	-1.783	5.8918e-12
157	FLOT1	ENSG00000137312	-0.716225	0.0294312	-1.25437	1.34001e-06
158	MTCH1	ENSG00000137409	-0.556957	2.6673e-06	-1.0925	2.33491e-15
159	EMILIN1	ENSG00000138080	-0.962938	3.06032e-05	-1.7488	1.14545e-18
160	LOXL4	ENSG00000138131	-2.66391	4.77807e-09	-3.87419	4.95532e-122
161	RPS24	ENSG00000138326	-0.620587	0.00066475	-1.19138	2.39219e-07
162	SEMA7A	ENSG00000138623	-1.91339	1.4217e-07	-2.22508	8.00694e-83
163	GALNT6	ENSG00000139629	-4.48814	0.00372695	-2.70874	3.90446e-19
164	RPS2	ENSG00000140988	-0.598966	0.0113403	-1.09588	3.02866e-05
165	RPS2	ENSG00000140988	-0.445294	0.0160318	-1.09588	3.02866e-05
166	SAT2	ENSG00000141504	-0.532166	0.0295263	-1.10317	0.000267966
167	TP53	ENSG00000141510	-0.523495	0.00635606	-1.02376	1.90671e-05
168	P3H4	ENSG00000141696	-0.618574	0.0411173	-1.46358	2.29348e-09
169	RPS8	ENSG00000142937	-0.531689	0.021174	-1.05353	7.4253e-06
170	GALNT2	ENSG00000143641	-0.355164	0.0485523	-0.746546	2.02823e-10
171	SLC20A1	ENSG00000144136	-0.815188	0.0011936	-1.12191	2.83242e-07
172	SUMF1	ENSG00000144455	-0.767448	0.0154422	-1.42142	1.02362e-38
173	RPL32	ENSG00000144713	-1.05288	0.000545493	-1.9778	2.65475e-14
174	TMEM44	ENSG00000145014	-2.03709	0.025104	-1.2508	7.43507e-09
175	CORIN	ENSG00000145244	-1.24571	0.0311122	-1.87911	6.12222e-20
176	RPS3A	ENSG00000145425	-0.486253	0.00262936	-0.964663	6.95382e-05
177	RPL37	ENSG00000145592	-0.450837	0.0411173	-1.09475	9.92782e-05
178	PPP1R18	ENSG00000146112	-1.04069	0.0332274	-0.997983	2.90821e-06
179	NFKBIE	ENSG00000146232	-1.9418	5.40289e-07	-2.81148	5.4498e-22
180	TPBG	ENSG00000146242	-1.27439	0.000413372	-1.61117	8.68443e-13
181	ABRACL	ENSG00000146386	-0.715408	0.0118215	-1.04696	4.85703e-07
182	DYNLT1	ENSG00000146425	-1.09873	0.00126562	-1.67644	3.66949e-13
183	RPL7	ENSG00000147604	-0.411033	0.0170698	-0.884915	0.00132721
184	SLC39A4	ENSG00000147804	-0.904773	0.0464526	-1.63453	1.25616e-07
185	FUOM	ENSG00000148803	-1.39002	0.000223205	-2.13028	6.57731e-08
186	RPS3	ENSG00000149273	-0.514845	0.039141	-1.13536	0.000170706
187	SIDT2	ENSG00000149577	-0.559017	0.00775752	-1.10007	1.38813e-16
188	TAGLN	ENSG00000149591	-1.10466	0.00584234	-1.99945	2.59381e-12
189	VPS51	ENSG00000149823	-0.621702	0.0209469	-1.09244	7.20508e-07
190	BEND6	ENSG00000151917	-2.97254	0.0262034	-0.935837	0.0130087
191	MAGED4B	ENSG00000154545	-1.47411	0.0107117	-4.27119	1.19686e-30
192	GTF3C6	ENSG00000155115	-0.704182	1.07956e-05	-1.02624	8.79639e-07
193	MARVELD1	ENSG00000155254	-0.610593	2.03431e-07	-1.14642	4.88677e-12
194	EEF1A1	ENSG00000156508	-0.988024	2.04404e-08	-1.30359	6.12986e-30
195	ZFAND3	ENSG00000156639	-0.698088	0.00660572	-0.989698	5.23691e-08
196	SEC13	ENSG00000157020	-0.564225	0.0492602	-1.26435	3.60636e-16
197	NECAP2	ENSG00000157191	-0.355497	0.0407228	-0.818429	2.35118e-06
198	SLC35B2	ENSG00000157593	-0.695673	1.83766e-06	-1.38116	4.13024e-18
199	CDA	ENSG00000158825	-4.06961	0.00106189	-4.64567	1.75811e-23
200	CSRP1	ENSG00000159176	-1.15304	1.22178e-05	-1.54787	3.73311e-17
201	PRAC1	ENSG00000159182	-3.27492	0.0352138	-6.57552	7.26475e-06
202	CHCHD6	ENSG00000159685	-0.798785	0.0332274	-1.36184	7.51277e-06
203	ZYX	ENSG00000159840	-1.21027	5.95257e-05	-1.88652	4.70776e-11
204	PDE9A	ENSG00000160191	-3.63411	0.0260426	-2.05918	1.31009e-13
205	ANO10	ENSG00000160746	-0.74361	0.00127062	-1.18557	2.24369e-18
206	SQSTM1	ENSG00000161011	-0.545933	0.0136591	-1.0235	7.24725e-12
207	MGAT4B	ENSG00000161013	-0.714764	8.0988e-05	-1.18747	1.11444e-13
208	ITGA5	ENSG00000161638	-0.729485	9.85382e-09	-1.14117	2.0615e-15
209	EMC10	ENSG00000161671	-0.54414	0.0237497	-1.09169	6.30039e-09
210	RPL26	ENSG00000161970	-0.532962	0.00280836	-1.18897	2.68077e-06
211	RPL29	ENSG00000162244	-0.888877	0.00299055	-1.76068	8.6153e-12
212	FBLIM1	ENSG00000162458	-0.893684	0.000196509	-1.28767	4.31545e-19
213	ALPL	ENSG00000162551	-1.95278	6.54443e-07	-2.78896	4.00359e-28
214	DIRAS3	ENSG00000162595	-2.62206	0.0208597	-1.90774	4.51357e-07
215	ACTG2	ENSG00000163017	-2.16745	0.00159516	-3.30926	8.98922e-57
216	LMOD1	ENSG00000163431	-1.11477	0.00530088	-1.66446	1.76949e-51
217	RPL22L1	ENSG00000163584	-1.46637	0.000249447	-2.26899	3.68289e-19
218	THOC7	ENSG00000163634	-0.696839	0.0151723	-1.1444	8.03022e-09
219	PTX3	ENSG00000163661	-0.936624	0.0216977	-1.67713	1.95241e-13
220	RPL9	ENSG00000163682	-0.564189	0.00966436	-0.569144	0.00122628
221	IL17RC	ENSG00000163702	-1.4767	7.73174e-06	-1.48341	1.92605e-08
222	MTMR14	ENSG00000163719	-0.9455	0.00180423	-1.48521	3.06068e-16
223	CLEC3B	ENSG00000163815	-1.87648	0.000189885	-3.24377	4.72774e-19
224	RPN1	ENSG00000163902	-0.491596	0.0198791	-1.08614	3.5134e-30
225	CITED2	ENSG00000164442	-1.13537	5.64708e-08	-1.50055	2.0478e-18
226	RPS14	ENSG00000164587	-0.513035	0.0336102	-1.18762	1.08566e-05
227	RPL27A	ENSG00000166441	-0.757336	0.00227106	-1.31936	4.11973e-05
228	GPX4	ENSG00000167468	-0.736737	0.0385224	-1.59526	1.51331e-05
229	EEF2	ENSG00000167658	-0.452769	4.78932e-06	-0.900267	2.96231e-10
230	UBXN6	ENSG00000167671	-0.578533	0.0126153	-1.12165	2.05664e-05
231	FAM234A	ENSG00000167930	-0.811828	0.00388918	-1.46761	1.115e-06
232	FTH1	ENSG00000167996	-0.780439	9.85586e-05	-1.4198	5.61851e-10
233	RPSA	ENSG00000168028	-1.02771	0.00633318	-1.81734	2.25026e-08
234	RPSA	ENSG00000168028	-3.73579	0.0134634	-1.81734	2.25026e-08
235	RPSA	ENSG00000168028	-1.19837	0.0315689	-1.81734	2.25026e-08
236	NT5DC2	ENSG00000168268	-1.08856	0.0137701	-1.92142	1.7516e-14
237	TSPAN5	ENSG00000168785	-0.517777	0.0262697	-0.905868	2.70864e-14
238	SF3B5	ENSG00000169976	-1.24222	7.10101e-06	-1.86201	1.49337e-06
239	HOXD12	ENSG00000170178	-5.42939	0.0116516	-4.54941	4.99333e-38
240	RPS9	ENSG00000170889	-0.880214	0.0138078	-1.34897	0.00459073
241	JAGN1	ENSG00000171135	-0.832455	0.000211555	-1.41728	2.83354e-12
242	KRT19	ENSG00000171345	-1.76911	0.00977836	-2.51244	2.83354e-12
243	POLR1C	ENSG00000171453	-0.64264	0.0174706	-1.0137	2.53075e-06
244	ZNF318	ENSG00000171467	-10.0346	0.024379	-0.719366	0.0144163
245	RPS7	ENSG00000171863	-0.675649	0.000180257	-1.19015	4.20888e-08
246	QARS1	ENSG00000172053	-0.814192	1.01827e-05	-1.38496	6.14039e-22
247	PPP1CA	ENSG00000172531	-0.381594	0.0382972	-0.867455	0.000709257
248	GLRX	ENSG00000173221	-1.40479	3.16023e-10	-1.84014	1.66931e-42
249	JUP	ENSG00000173801	-5.50153	0.0293667	-2.97432	8.21986e-36
250	RPL4	ENSG00000174444	-0.546397	0.000372309	-1.01519	4.97501e-12
251	RPL15	ENSG00000174748	-0.948911	0.0128941	-1.57199	4.19922e-36
252	CD248	ENSG00000174807	-0.747608	0.0116656	-1.47389	2.82447e-07
253	RSRC1	ENSG00000174891	-9.80827	0.0093735	-0.891522	0.00268752
254	MARCKSL1	ENSG00000175130	-1.18727	2.97124e-05	-2.90123	9.11137e-41
255	PSMD2	ENSG00000175166	-0.512935	0.00395179	-1.10059	1.91952e-17
256	EIF3F	ENSG00000175390	-0.600942	0.00036602	-1.13059	2.98477e-08
257	MAN1B1	ENSG00000177239	-0.564001	0.0246964	-1.18105	0.00108811
258	ACAD9	ENSG00000177646	-0.777739	0.00337616	-1.29865	5.6315e-13
259	RPS27	ENSG00000177954	-0.595817	0.0304574	-0.938137	0.000625128
260	NDUFAF3	ENSG00000178057	-0.756677	0.0167089	-1.60438	3.38363e-11
261	CTXN1	ENSG00000178531	-1.50187	0.000100603	-2.35047	8.73813e-11
262	CALR	ENSG00000179218	-0.6651	0.0004329	-1.36017	7.26733e-15
263	GATA2	ENSG00000179348	-3.96698	0.00480938	-3.397	2.2386e-70
264	OAZ2	ENSG00000180304	-0.334236	0.0200862	-0.705349	4.31012e-10
265	HCLS1	ENSG00000180353	-12.0846	0.000300662	-4.63161	2.56944e-38
266	PSMG4	ENSG00000180822	-0.899001	0.000316732	-1.25921	6.20302e-10
267	MRPL14	ENSG00000180992	-0.993073	0.000513129	-1.73465	1.90983e-11
268	SGSH	ENSG00000181523	-0.859107	0.0115454	-1.2056	9.12987e-07
269	DEXI	ENSG00000182108	-0.378404	0.018917	-0.943348	1.07512e-05
270	HHIPL1	ENSG00000182218	-4.31348	0.0232055	-1.12387	1.09287e-10
271	ANXA2	ENSG00000182718	-0.338847	0.0223196	-0.781195	7.83013e-07
272	RPL35A	ENSG00000182899	-0.890958	0.00415676	-1.74699	2.65511e-13
273	GAS6	ENSG00000183087	-1.23939	4.98183e-14	-1.77874	1.20082e-23
274	FOXL2	ENSG00000183770	-1.10003	0.00253776	-1.87274	9.20614e-15
275	ZNF703	ENSG00000183779	-1.07392	7.10101e-06	-1.72329	4.27357e-11
276	ACTG1	ENSG00000184009	-0.683868	0.000784	-1.18968	2.48165e-27
277	OAF	ENSG00000184232	-0.5227	0.0409737	-1.12298	1.34183e-06
278	ACTRT3	ENSG00000184378	-1.88533	0.0363187	-0.971087	0.000168392
279	STING1	ENSG00000184584	-1.44907	2.03857e-05	-2.22835	1.97265e-21
280	SEPTIN9	ENSG00000184640	-0.399352	0.000316732	-0.931511	1.7956e-09
281	PTRHD1	ENSG00000184924	-0.689791	0.0256403	-1.34565	1.27147e-07
282	SOCS1	ENSG00000185338	-1.46269	0.000231954	-2.56959	5.85304e-36
283	RPS23	ENSG00000186468	-0.466146	0.0137508	-1.0035	3.27569e-05
284	SMIM29	ENSG00000186577	-0.637921	0.0107098	-1.02827	3.09676e-05
285	MAGED4	ENSG00000187243	-1.47411	0.0107117	-4.05784	1.05732e-35
286	S100A16	ENSG00000188643	-0.923915	0.00118801	-1.86099	5.54227e-14
287	RPL14	ENSG00000188846	-0.902973	0.00408358	-1.6339	1.06482e-20
288	TSPYL1	ENSG00000189241	-0.843881	0.00689939	-1.14255	1.6261e-06
289	TUBB	ENSG00000196230	-0.590568	0.0329166	-0.996994	2.60964e-11
290	EPHB4	ENSG00000196411	-0.520653	0.0210632	-1.02459	1.46681e-08
291	LAMA2	ENSG00000196569	-13.6244	0.000809729	-1.60953	2.31694e-09
292	HDAC2	ENSG00000196591	-0.575493	0.0415882	-0.742444	7.22214e-05
293	TOMM7	ENSG00000196683	-0.621684	0.0103422	-1.29723	4.83929e-05
294	ILRUN	ENSG00000196821	-0.797307	5.18106e-08	-1.16481	9.89597e-08
295	PDLIM7	ENSG00000196923	-0.746298	0.0414526	-1.54864	1.32088e-08
296	RPL37A	ENSG00000197756	-0.598961	0.0124472	-1.27087	7.41887e-06
297	MYO1C	ENSG00000197879	-0.302256	0.0270737	-0.698076	2.06127e-06
298	S100A6	ENSG00000197956	-0.832192	0.00332613	-1.34637	3.58568e-05
299	TPM2	ENSG00000198467	-1.38831	0.0464861	-2.36077	4.71142e-10
300	SH3BGRL2	ENSG00000198478	-4.11989	0.0144429	-2.78273	7.03084e-38
301	C6orf89	ENSG00000198663	-0.682977	0.00274555	-0.945719	1.95028e-21
302	ECI2	ENSG00000198721	-0.477321	0.00230032	-1.02189	2.58042e-13
303	RPL10A	ENSG00000198755	-0.843331	9.85586e-05	-1.51607	2.07684e-07
304	SFT2D1	ENSG00000198818	-0.689435	0.0153933	-0.696136	0.00108442
305	CCDC167	ENSG00000198937	-1.30964	0.00736954	-2.35237	6.39327e-08
306	C1orf53	ENSG00000203724	-0.865957	0.023329	-1.30436	0.000542895
307	FAM229B	ENSG00000203778	-1.05818	0.00342921	-1.79744	5.87698e-17
308	AGPAT1	ENSG00000204310	-0.577036	0.0257091	-1.26785	2.0421e-10
309	NELFE	ENSG00000204356	-1.14601	0.0240657	-1.39897	3.03581e-07
310	NEU1	ENSG00000204386	-1.5068	0.00342921	-1.80494	2.21253e-23
311	VARS1	ENSG00000204394	-1.3609	0.00946652	-1.3623	4.08213e-15
312	BAG6	ENSG00000204463	-0.787156	0.0208062	-1.40905	1.97265e-21
313	PRRC2A	ENSG00000204469	-1.79928	0.0386279	-1.29699	4.63165e-10
314	AKT1S1	ENSG00000204673	-0.826188	0.0123826	-1.16167	6.64111e-05
315	TMSB4X	ENSG00000205542	-0.640573	0.00024576	-1.61567	1.56189e-16
316	ATF6B	ENSG00000213676	-1.00383	0.00234213	-1.37006	9.06372e-24
317	CLIC1	ENSG00000213719	-0.579554	0.00123369	-1.06512	4.27556e-10
318	TTLL3	ENSG00000214021	-1.03432	0.00977057	-1.02536	1.82339e-12
319	LYRM4	ENSG00000214113	-0.935374	0.00630202	-1.72193	2.86279e-09
320	VPS52	ENSG00000223501	-1.15082	0.0437199	-1.44958	3.43969e-21
321	MCRIP1	ENSG00000225663	-0.725069	0.0262697	-1.40984	0.0148431
322	RPS18	ENSG00000231500	-0.982026	4.94155e-08	-1.57291	2.7919e-14
323	TAPBP	ENSG00000231925	-1.77351	0.00447592	-1.33491	3.73333e-06
324	RPS28	ENSG00000233927	-0.870848	0.0351212	-1.62383	0.000214494
325	ZBTB22	ENSG00000236104	-2.01339	0.0222993	-1.63175	2.22057e-22
326	RGL2	ENSG00000237441	-1.09274	0.00393652	-1.51073	8.48802e-15
327	TXNDC5	ENSG00000239264	-0.721655	0.000182775	-1.14851	3.53825e-20
328	LY6G5B	ENSG00000240053	-1.20041	0.000515074	-1.39538	2.0214e-06
329	ISY1	ENSG00000240682	-0.528779	0.0457117	-1.26576	2.91423e-05
330	TMEM158	ENSG00000249992	-0.915473	0.0173542	-1.55296	2.71712e-19
331	EEF1G	ENSG00000254772	-0.675697	0.0386909	-1.13056	4.56543e-06
332	BRK1	ENSG00000254999	-0.559169	0.0127465	-1.19023	2.62495e-05
333	CUX1	ENSG00000257923	-0.668531	0.00626322	-0.766734	1.99536e-08
334	BAP18	ENSG00000258315	-0.701723	0.0293667	-1.53834	2.77575e-06
335	RPL17	ENSG00000265681	-0.565275	0.0132465	-1.08053	8.91307e-09
336	GTF2H5	ENSG00000272047	-0.870445	0.0260829	-1.25953	2.08223e-09
337	NUDT3	ENSG00000272325	-1.18142	1.17155e-05	-0.825425	0.0239761

## Sheet: YvsO(O↑)
	Supplementary Table S5E.
	Common DEGs identified by both workflows (padj < 0.05).
			Portable Pipeline		Command-line
	Gene name	Ensembl ID	log2FC	padj	log2FC	padj
1	NIPAL3	ENSG00000001461	1.46217	0.000371309	0.900871	1.8769e-08
2	CYP51A1	ENSG00000001630	0.785877	0.0316043	0.985874	0.000362465
3	LAP3	ENSG00000002549	1.46406	0.00267503	1.16648	1.9521e-14
4	TMEM176A	ENSG00000002933	5.31257	5.52663e-07	8.07083	4.2851e-151
5	TFPI	ENSG00000003436	1.57073	0.000952924	1.47077	3.01295e-09
6	RECQL	ENSG00000004700	1.11137	0.000651578	0.973864	0.0284255
7	HOXA11	ENSG00000005073	1.17406	4.65253e-07	0.644787	2.85822e-05
8	CROT	ENSG00000005469	3.72765	1.93652e-08	1.21309	2.23085e-07
9	MYCBP2	ENSG00000005810	5.74307	0.00127548	1.15246	0.00163524
10	BAIAP2L1	ENSG00000006453	2.19904	0.00770888	0.702846	6.08142e-06
11	IFRD1	ENSG00000006652	1.67187	0.00496669	1.41733	1.69182e-09
12	VPS41	ENSG00000006715	1.25394	0.015795	0.807439	0.000946873
13	CYTH3	ENSG00000008256	1.46677	0.016	0.650154	0.00571747
14	SYPL1	ENSG00000008282	1.18498	0.00562495	1.35917	0.000114762
15	CYB561	ENSG00000008283	1.31021	0.000150422	0.883853	5.35405e-11
16	MGST1	ENSG00000008394	0.900956	0.000745438	0.772252	7.89082e-06
17	ETV7	ENSG00000010030	5.99487	0.000762047	3.2851	3.86743e-19
18	IFFO1	ENSG00000010295	1.03622	0.00264504	0.578328	0.00313927
19	DCN	ENSG00000011465	2.1669	1.20234e-08	2.0009	1.33704e-42
20	MAP4K3	ENSG00000011566	2.92589	0.026487	1.67081	0.00217591
21	LDAF1	ENSG00000011638	1.10016	0.00170591	0.62421	0.000186529
22	MAP4K5	ENSG00000012983	2.56148	0.0423829	1.10788	0.0213566
23	CLK1	ENSG00000013441	1.07818	0.0013081	1.17276	0.000798181
24	RUFY3	ENSG00000018189	1.3348	0.0237662	0.768183	1.91525e-08
25	SLC11A1	ENSG00000018280	0.430408	0.000782718	2.00456	0.000278305
26	SNAI2	ENSG00000019549	0.871464	0.000269421	0.936629	0.00135949
27	HGF	ENSG00000019991	5.23686	6.43968e-10	3.62865	1.34945e-24
28	ADGRA2	ENSG00000020181	0.969256	0.000889526	0.453844	0.0499695
29	BIRC3	ENSG00000023445	3.418	0.0320167	1.77211	1.63258e-08
30	GCLM	ENSG00000023909	0.940209	0.0351126	0.852478	0.0101078
31	FAS	ENSG00000026103	1.30515	2.22991e-05	1.21839	3.7119e-05
32	VRK2	ENSG00000028116	1.39555	0.0468847	0.555703	0.0415621
33	ANK1	ENSG00000029534	6.97078	0.00121125	2.1404	2.44094e-48
34	CLXN	ENSG00000034239	3.0827	0.0494558	1.85387	1.33078e-13
35	RNF19A	ENSG00000034677	2.59294	0.0107853	1.06151	0.0106471
36	RAB27B	ENSG00000041353	12.35	3.28548e-06	5.71133	7.14689e-38
37	RIPOR3	ENSG00000042062	9.73395	0.0111163	3.08735	9.49519e-49
38	RETSAT	ENSG00000042445	1.05338	3.15112e-05	0.605426	4.13129e-05
39	ATOSA	ENSG00000047346	5.5232	0.018271	1.44721	5.52986e-05
40	HDAC9	ENSG00000048052	8.59879	0.0204923	2.09801	4.64193e-09
41	CC2D2A	ENSG00000048342	1.58306	0.00055845	0.851025	2.98745e-08
42	RRM2B	ENSG00000048392	2.54408	0.00016901	2.30886	7.37165e-11
43	LTBP1	ENSG00000049323	1.98243	0.0442228	1.63027	4.3436e-05
44	ELN	ENSG00000049540	7.15215	2.89747e-08	7.52053	1.28522e-182
45	HEXB	ENSG00000049860	1.30625	4.36881e-07	1.14649	4.34072e-13
46	JKAMP	ENSG00000050130	1.1876	0.000152897	1.00244	0.000748852
47	LY75	ENSG00000054219	2.64869	0.000155039	4.392	2.75991e-06
48	EIF2AK2	ENSG00000055332	5.75259	1.96679e-07	2.773	1.00225e-20
49	SOAT1	ENSG00000057252	1.34478	0.0129819	0.989691	2.82564e-05
50	PARP12	ENSG00000059378	2.78415	0.00055845	1.79332	8.47511e-15
51	PIGV	ENSG00000060642	1.45055	0.0486302	0.546955	0.000635481
52	RBMS1	ENSG00000060656	1.1312	0.000807279	0.913803	7.80926e-09
53	NCKAP1	ENSG00000061676	1.58196	0.00493679	1.12746	0.00852507
54	GPBP1	ENSG00000062194	1.31565	0.00570083	0.659269	0.00106056
55	VMP1	ENSG00000062716	0.70876	0.000185063	0.460986	0.0052184
56	APPBP2	ENSG00000062725	1.51393	0.00344821	0.880073	0.00428203
57	SLC6A16	ENSG00000063127	1.4533	0.0490706	1.51135	1.63822e-05
58	MED29	ENSG00000063322	0.764821	0.00151137	0.338795	0.000365399
59	LIMCH1	ENSG00000064042	11.1833	0.0110514	3.44759	1.20128e-27
60	TM7SF3	ENSG00000064115	1.27374	3.78553e-05	0.938442	6.0038e-10
61	PACC1	ENSG00000065600	1.92758	0.029425	0.911215	0.000106749
62	SEC61A2	ENSG00000065665	3.2583	0.0499321	0.929658	4.03121e-10
63	CDK13	ENSG00000065883	1.84414	0.0276839	0.623652	0.0278805
64	LRRC40	ENSG00000066557	11.3036	1.80712e-05	1.4594	0.00444389
65	ISOC1	ENSG00000066583	0.909858	0.0388581	0.60534	0.0423051
66	SP100	ENSG00000067066	1.93189	0.0165794	1.36736	1.06329e-18
67	PLPP1	ENSG00000067113	0.961934	2.91899e-07	0.682978	1.34847e-06
68	TRAM1	ENSG00000067167	1.48241	0.0183527	1.66484	0.000447555
69	TRO	ENSG00000067445	2.38726	0.017699	1.09977	1.32281e-13
70	SYT1	ENSG00000067715	8.03752	0.0140693	3.1763	1.98971e-25
71	MEF2A	ENSG00000068305	2.71586	0.000354872	1.09919	0.000151629
72	KCNAB2	ENSG00000069424	2.26298	0.0236802	1.06381	2.8985e-08
73	NUCB2	ENSG00000070081	1.31736	0.00201154	0.801925	9.36903e-07
74	OSBPL3	ENSG00000070882	1.85258	0.0228599	1.29289	2.30094e-07
75	ATP2B1	ENSG00000070961	2.11125	0.0321346	1.69705	2.0744e-06
76	SEL1L	ENSG00000071537	1.66093	0.00161622	1.10026	0.00955844
77	TRIB2	ENSG00000071575	2.46825	0.000100321	1.53069	8.36842e-13
78	CYBRD1	ENSG00000071967	2.41856	1.38774e-09	2.26691	5.05792e-10
79	ALDH3A2	ENSG00000072210	1.96398	1.06488e-08	2.02176	1.5228e-62
80	UBE2D1	ENSG00000072401	1.22427	0.0293779	1.15981	0.00847375
81	NFATC3	ENSG00000072736	2.58552	0.0252894	0.675719	0.0121502
82	EVC	ENSG00000072840	2.17697	0.000718882	0.983259	0.00105592
83	ZNF532	ENSG00000074657	2.84348	1.40659e-05	1.12369	0.000162993
84	LMAN1	ENSG00000074695	0.878633	0.00643398	0.91919	0.0084275
85	SEMA3C	ENSG00000075223	3.78427	2.03714e-15	3.91315	8.68227e-12
86	MOCOS	ENSG00000075643	3.63706	0.00068556	0.917142	4.47166e-08
87	SLC46A1	ENSG00000076351	1.70802	0.0298498	0.709934	3.41678e-06
88	PAG1	ENSG00000076641	5.06006	0.000234012	2.70666	6.21103e-25
89	APBB1IP	ENSG00000077420	11.9689	0.000291759	4.34708	3.14679e-64
90	GPR137B	ENSG00000077585	1.39221	4.8402e-06	0.770745	0.00257715
91	TIGAR	ENSG00000078237	1.7705	2.93215e-05	1.72125	1.98271e-11
92	HOXA9	ENSG00000078399	0.962496	1.34386e-06	0.481039	0.0147542
93	PCM1	ENSG00000078674	3.49434	0.0395035	0.521874	0.0294097
94	FKBP7	ENSG00000079150	0.789481	0.019549	0.636108	0.0293767
95	TNS1	ENSG00000079308	12.2687	1.16406e-08	1.13181	3.94239e-11
96	CDC14B	ENSG00000081377	10.3808	0.0136088	1.33689	8.29191e-09
97	MPP4	ENSG00000082126	10.186	0.0143299	1.22059	1.03864e-06
98	TRAF5	ENSG00000082512	9.65635	0.0449888	0.512257	0.00184909
99	RNF13	ENSG00000082996	1.28752	0.000468599	1.11553	0.00114436
100	TUT7	ENSG00000083223	2.39272	0.0237231	0.612338	0.0344688
101	ZNF264	ENSG00000083844	2.94448	0.00433828	1.0889	6.44595e-05
102	ZMPSTE24	ENSG00000084073	1.33543	0.00374665	1.42694	1.32039e-05
103	SSH1	ENSG00000084112	3.75829	3.78694e-06	0.920527	4.57949e-06
104	APLP2	ENSG00000084234	1.28541	7.48931e-07	0.944501	3.87876e-08
105	RRN3	ENSG00000085721	0.917241	0.0274927	0.856911	0.0115334
106	MGST2	ENSG00000085871	1.43457	2.32389e-08	0.814212	0.000675288
107	EPDR1	ENSG00000086289	1.99325	0.00685905	2.26413	7.31194e-25
108	HSD17B2	ENSG00000086696	2.55622	1.40937e-09	1.98086	9.77536e-25
109	LPCAT2	ENSG00000087253	4.08284	6.60201e-05	2.52666	9.25323e-12
110	EPB41L1	ENSG00000088367	1.71562	0.0017976	0.816674	1.37597e-09
111	ANKRD10	ENSG00000088448	1.69574	0.00419609	0.695656	0.000155926
112	EBF4	ENSG00000088881	11.8296	1.40946e-12	3.66253	2.33325e-33
113	CPXM1	ENSG00000088882	3.59733	1.47096e-07	1.69868	1.95082e-08
114	SNX5	ENSG00000089006	0.864123	0.0104666	0.415144	0.00546107
115	SLC23A2	ENSG00000089057	5.5865	0.000547608	1.24061	8.74707e-06
116	OAS1	ENSG00000089127	14.7865	7.90671e-08	12.8195	1.49119e-23
117	ZBTB25	ENSG00000089775	2.25365	0.0303733	1.44701	1.57575e-07
118	SPTLC1	ENSG00000090054	1.4597	0.0110087	1.16115	0.000195696
119	NLRP1	ENSG00000091592	1.36532	0.000708041	0.64116	0.000814332
120	HAUS4	ENSG00000092036	0.979675	0.000224451	0.524291	0.00776249
121	SLC7A8	ENSG00000092068	1.65857	0.0215956	0.786369	1.00698e-05
122	SLC22A17	ENSG00000092096	1.58457	4.50955e-07	0.976717	2.11613e-05
123	TRPM7	ENSG00000092439	8.42085	0.0119592	1.63429	4.24676e-05
124	SUCO	ENSG00000094975	11.8149	0.00620959	0.905638	0.027721
125	TBC1D2	ENSG00000095383	1.39966	1.63416e-06	0.911977	2.07725e-06
126	WHRN	ENSG00000095397	3.53355	0.0453232	0.837832	1.65312e-06
127	RAB18	ENSG00000099246	1.2218	0.00851464	1.32361	0.000232992
128	PRTFDC1	ENSG00000099256	1.04121	0.0129708	0.575295	0.0274034
129	PALMD	ENSG00000099260	11.8522	1.00285e-05	2.79527	3.34023e-24
130	TSPAN15	ENSG00000099282	2.89981	5.50827e-09	2.54779	2.32027e-31
131	MACROH2A2	ENSG00000099284	3.05463	0.000151038	1.24025	5.64188e-09
132	HSD3B7	ENSG00000099377	0.845778	0.00181465	0.675765	0.00853738
133	PALM	ENSG00000099864	12.3743	0.0426922	3.9071	5.92494e-14
134	GGT5	ENSG00000099998	4.36232	0.0228081	0.974908	0.00965061
135	PIK3IP1	ENSG00000100100	2.24894	0.0121491	1.67219	1.83255e-33
136	ABHD4	ENSG00000100439	1.26047	0.000351345	0.748338	7.50978e-05
137	VCPKMT	ENSG00000100483	1.59165	0.0395574	0.852724	0.000416922
138	CNIH1	ENSG00000100528	0.801345	0.00608016	0.757651	0.0242237
139	CGRRF1	ENSG00000100532	0.958102	0.0422313	0.795543	0.000621788
140	PIGH	ENSG00000100564	1.00771	0.007382	0.628596	0.000186796
141	LGMN	ENSG00000100600	1.01322	0.000364222	0.332176	0.0082255
142	DHRS7	ENSG00000100612	1.16879	4.51741e-09	0.904819	1.03306e-16
143	PPM1A	ENSG00000100614	1.11351	0.0472283	0.941224	0.000699012
144	GALNT16	ENSG00000100626	10.7708	5.63815e-08	1.57731	2.11779e-19
145	SUSD6	ENSG00000100647	3.70113	0.00194276	0.840557	0.010318
146	PPP4R3A	ENSG00000100796	1.98497	0.0456136	0.547837	0.000366719
147	ARHGAP5	ENSG00000100852	3.18665	0.00125194	1.78026	0.00418386
148	REC8	ENSG00000100918	3.13296	2.48729e-07	1.90314	1.34492e-20
149	PLTP	ENSG00000100979	1.7923	0.000361066	1.04861	2.95563e-06
150	PROCR	ENSG00000101000	0.790265	0.000227653	0.458949	0.00787183
151	CD40	ENSG00000101017	2.08728	0.00597713	0.75338	0.0158446
152	ISM1	ENSG00000101230	6.96014	1.05824e-06	3.27128	3.05917e-16
153	RASSF2	ENSG00000101265	4.81818	0.0267759	2.36517	4.36822e-21
154	CDS2	ENSG00000101290	0.883684	0.0333594	0.400767	0.0100841
155	FERMT1	ENSG00000101311	10.6644	0.044927	2.11437	1.53767e-10
156	SAMHD1	ENSG00000101347	3.55413	0.00482995	2.33521	6.01932e-28
157	SMAD7	ENSG00000101665	2.69074	1.50102e-05	2.0025	2.47865e-20
158	POLI	ENSG00000101751	2.4966	0.0193894	1.07541	0.00014187
159	RIOK3	ENSG00000101782	1.10844	0.000968279	0.937956	0.0134477
160	KLF5	ENSG00000102554	3.03319	0.00269063	1.92371	2.07348e-06
161	TSC22D1	ENSG00000102804	1.42546	7.59237e-08	1.34704	4.89517e-11
162	NFAT5	ENSG00000102908	10.6406	0.0147223	1.03089	0.042769
163	N4BP1	ENSG00000102921	1.12661	0.0489132	0.366781	0.0301806
164	ARL2BP	ENSG00000102931	0.45528	0.0410065	0.350217	0.033722
165	NDRG4	ENSG00000103034	3.87223	0.00260381	1.60588	1.93727e-17
166	FOXF1	ENSG00000103241	1.1211	0.00144066	0.81362	0.000317059
167	CPPED1	ENSG00000103381	1.08129	0.00140471	0.837916	4.9707e-11
168	SALL1	ENSG00000103449	3.17733	0.014161	2.13259	1.24582e-11
169	SYT17	ENSG00000103528	10.6462	1.14702e-07	4.68049	6.4504e-36
170	CTSH	ENSG00000103811	3.67092	3.63424e-16	2.53009	2.75407e-35
171	SGK3	ENSG00000104205	4.35708	1.65301e-05	1.21485	0.000558751
172	TRIM35	ENSG00000104228	1.11953	0.000918598	0.783749	2.3799e-05
173	NBN	ENSG00000104320	1.36028	0.0239473	0.956133	0.0212332
174	TRPA1	ENSG00000104321	2.31977	0.00497806	1.75626	2.20521e-17
175	CPQ	ENSG00000104324	1.51734	4.90844e-16	1.25139	5.25473e-21
176	BPNT2	ENSG00000104331	0.776373	0.0192442	0.505519	0.0372377
177	LAPTM4B	ENSG00000104341	0.697232	0.0490617	0.571588	1.65697e-06
178	NIPAL2	ENSG00000104361	4.40142	0.00194937	1.20355	1.34588e-05
179	ZC2HC1A	ENSG00000104427	4.02428	0.0274828	1.62652	3.85148e-05
180	ARMC1	ENSG00000104442	1.06441	0.0393985	1.20342	0.00627591
181	GSR	ENSG00000104687	0.961176	0.00862579	0.821981	0.000211529
182	KCTD9	ENSG00000104756	1.09994	0.00805981	0.955454	0.0107528
183	ASAH1	ENSG00000104763	1.51849	1.4212e-05	1.45546	3.38884e-09
184	OLFM2	ENSG00000105088	1.5262	0.0339742	1.27258	8.15745e-07
185	APLP1	ENSG00000105290	2.03035	0.00482995	0.568905	0.00817839
186	COMP	ENSG00000105664	14.8565	5.74846e-16	8.66987	9.98223e-29
187	TFPI2	ENSG00000105825	2.36086	0.000490835	3.49306	1.00625e-50
188	BET1	ENSG00000105829	0.987345	0.00216646	1.00225	0.000121346
189	PON2	ENSG00000105854	0.513873	0.0423911	0.398909	0.0377465
190	PTN	ENSG00000105894	2.19137	9.51542e-08	1.80022	8.79077e-18
191	ZC3HAV1	ENSG00000105939	2.38431	0.00798818	1.11534	4.91495e-13
192	CAV2	ENSG00000105971	0.628754	0.0101695	0.503723	0.0421012
193	CAV1	ENSG00000105974	0.598399	0.0429433	0.66756	0.00207146
194	WNT2	ENSG00000105989	2.96287	0.0166447	0.636816	0.00579998
195	HOXA13	ENSG00000106031	1.22388	0.0374161	0.762998	0.00112025
196	TMEM106B	ENSG00000106460	1.47398	0.0304019	1.61949	0.00115079
197	ZNF862	ENSG00000106479	3.389	0.0159214	0.436606	0.00694476
198	TSPAN13	ENSG00000106537	1.20985	0.0038311	1.31555	0.000139032
199	AHR	ENSG00000106546	3.2906	0.00267503	2.13157	7.41903e-07
200	GIMAP2	ENSG00000106560	4.18384	0.00323515	2.84003	3.43517e-10
201	TMEM176B	ENSG00000106565	6.45189	6.81607e-25	6.57282	3.26949e-92
202	SLC1A1	ENSG00000106688	5.24845	1.38774e-09	2.56505	1.8231e-14
203	TMEM245	ENSG00000106771	1.69872	0.00537777	1.18694	2.45899e-06
204	TRIM14	ENSG00000106785	2.76545	0.0164491	2.10346	1.48771e-27
205	ASPN	ENSG00000106819	4.93903	2.29385e-06	3.2557	4.84327e-22
206	TLE4	ENSG00000106829	1.61266	9.59646e-09	1.11603	3.3127e-07
207	KANK1	ENSG00000107104	1.65492	0.00859951	1.50193	1.36659e-08
208	RIGI	ENSG00000107201	6.05983	1.65921e-05	3.62551	8.39285e-108
209	ZFAND5	ENSG00000107372	1.24808	6.37968e-08	1.01679	0.000302626
210	PHYH	ENSG00000107537	1.15478	1.52956e-05	1.07132	7.34564e-15
211	RAB11FIP2	ENSG00000107560	2.87391	0.017733	1.59224	2.23773e-06
212	UNC5B	ENSG00000107731	1.76498	0.00492149	0.671325	0.000186883
213	MICU1	ENSG00000107745	0.724917	0.00790563	0.282363	0.0161142
214	MINPP1	ENSG00000107789	1.20934	0.0429057	0.820651	0.0227913
215	SFXN3	ENSG00000107819	0.903877	0.0183851	0.485248	1.0446e-05
216	KAZALD1	ENSG00000107821	1.78833	0.0266206	0.809477	0.00219459
217	ACBD5	ENSG00000107897	3.53128	0.00238033	1.36743	0.00107097
218	DNAJC12	ENSG00000108176	4.44659	0.00473246	1.86136	0.00214967
219	NUFIP2	ENSG00000108256	1.43609	0.0153524	1.12801	2.125e-05
220	ALDH3A1	ENSG00000108602	4.51798	6.17521e-09	4.44138	3.08347e-53
221	LGALS3BP	ENSG00000108679	2.36615	3.74413e-20	1.85922	3.24188e-12
222	PEX12	ENSG00000108733	2.28517	0.00493925	1.03802	0.000995993
223	DHX58	ENSG00000108771	2.6581	8.10095e-06	1.90327	4.36557e-22
224	FAM20A	ENSG00000108950	1.72056	6.32151e-06	1.16719	4.40033e-13
225	MMD	ENSG00000108960	11.1168	7.24132e-05	1.634	3.65935e-08
226	WSB1	ENSG00000109046	1.37005	3.87261e-05	1.30573	0.000851865
227	PMP22	ENSG00000109099	0.635354	0.0376668	0.354916	0.00808676
228	TMEM33	ENSG00000109133	1.36408	0.0115888	1.03454	0.000510184
229	OCIAD1	ENSG00000109180	0.659575	0.000919461	0.446089	0.0410352
230	MANBA	ENSG00000109323	2.56139	0.0110514	1.23148	5.27279e-30
231	CPE	ENSG00000109472	3.49538	9.2458e-14	3.15273	1.02944e-33
232	AADAT	ENSG00000109576	2.01185	0.0404945	1.04418	0.000516575
233	SOD3	ENSG00000109610	4.80584	8.9138e-38	4.91077	4.30949e-59
234	CPZ	ENSG00000109625	2.30175	6.10395e-10	1.65384	2.64841e-11
235	FBXW7	ENSG00000109670	7.6494	0.000108228	1.14353	1.208e-05
236	BST1	ENSG00000109743	0.810836	0.000711613	0.316851	0.0234642
237	CRYAB	ENSG00000109846	1.81298	2.78379e-22	1.43201	7.69569e-11
238	CTSC	ENSG00000109861	1.5881	2.17069e-16	1.35217	3.2717e-25
239	SIAE	ENSG00000110013	1.48872	0.000152897	1.27322	2.92657e-10
240	DTX4	ENSG00000110042	5.57023	6.17521e-09	2.45739	1.92065e-32
241	UNC93B1	ENSG00000110057	1.53081	0.00110534	1.16798	5.84697e-08
242	CPT1A	ENSG00000110090	1.96328	0.0111543	1.25109	2.38857e-08
243	GALNT18	ENSG00000110328	1.38011	0.00134143	0.491514	0.000291446
244	BIRC2	ENSG00000110330	1.1581	0.00177966	0.862406	0.0101824
245	FBXO3	ENSG00000110429	1.08071	0.0318913	0.578632	0.0331118
246	MDK	ENSG00000110492	1.45847	6.1578e-08	1.11533	0.00361467
247	TSPAN11	ENSG00000110900	10.8901	0.00143601	4.75866	6.87771e-93
248	CSRNP2	ENSG00000110925	0.886285	0.007973	0.562162	0.00779873
249	ELK3	ENSG00000111145	1.01808	0.0296596	0.787253	0.00897392
250	CREBL2	ENSG00000111269	0.843768	0.0256115	0.580791	0.00501513
251	CDKN1B	ENSG00000111276	1.02748	0.0266206	0.915424	0.00624502
252	OAS3	ENSG00000111331	15.0391	8.51706e-05	4.31653	4.67428e-94
253	OAS2	ENSG00000111335	10.5636	6.43968e-10	7.24237	3.5009e-208
254	MGP	ENSG00000111341	5.16431	8.69566e-07	2.4665	4.89397e-15
255	VDR	ENSG00000111424	2.04543	0.0318913	0.97332	3.35074e-11
256	KRR1	ENSG00000111615	1.07997	0.0492532	1.02748	0.000277341
257	CHPT1	ENSG00000111666	1.3545	0.00277187	1.32401	2.40898e-11
258	LPCAT3	ENSG00000111684	0.7603	0.0308599	0.714996	0.00014274
259	CMAS	ENSG00000111726	0.7608	0.00719902	0.568783	0.0288715
260	VNN1	ENSG00000112299	4.49386	0.00135204	1.98118	9.68635e-16
261	TENT5A	ENSG00000112773	2.29825	0.0419264	1.89821	2.09212e-42
262	ERBIN	ENSG00000112851	5.43847	0.00537777	0.79732	0.0329196
263	SEMA5A	ENSG00000112902	2.00001	0.00311693	0.989432	8.69389e-07
264	MRPS30	ENSG00000112996	1.08609	0.00163833	0.993419	3.74515e-05
265	CERT1	ENSG00000113163	3.02011	0.0499321	1.14214	3.93609e-06
266	RASGRF2	ENSG00000113319	2.65959	0.028668	1.17529	1.94717e-12
267	CDH6	ENSG00000113361	11.973	7.96057e-08	10.4273	1.18807e-25
268	ARRDC3	ENSG00000113369	2.14485	0.0423911	1.43366	0.00155602
269	SLC27A6	ENSG00000113396	11.0679	0.00894271	3.60062	9.22239e-15
270	LNPEP	ENSG00000113441	10.9622	0.0308223	1.06216	0.00016166
271	TXNDC15	ENSG00000113621	0.487196	0.0085458	0.30219	0.0107272
272	SMAD5	ENSG00000113658	1.62204	0.0499321	1.2864	0.00384749
273	ATP6V0E1	ENSG00000113732	0.807301	8.393e-07	0.611278	0.0172834
274	STC2	ENSG00000113739	1.16795	0.000363558	1.19603	6.69276e-40
275	ADAM23	ENSG00000114948	1.89414	0.0357924	1.04203	2.26256e-10
276	MOB1A	ENSG00000114978	0.845391	0.00356974	0.723164	0.00450798
277	SLC35F5	ENSG00000115084	1.74335	0.00128236	1.51615	6.96914e-05
278	GPD2	ENSG00000115159	4.13243	0.00127244	1.82124	1.08682e-05
279	PDE1A	ENSG00000115252	11.1126	8.0285e-15	3.75451	1.30653e-46
280	IFIH1	ENSG00000115267	12.7512	4.46661e-08	4.0264	1.09669e-48
281	EFEMP1	ENSG00000115380	2.18485	2.16864e-11	1.38614	2.66401e-09
282	FANCL	ENSG00000115392	1.4285	0.0110514	1.24112	3.26658e-05
283	STAT1	ENSG00000115415	2.34075	0.00040037	2.41946	7.37769e-13
284	GLS	ENSG00000115419	1.23864	0.000418469	1.06004	0.00242719
285	IGFBP5	ENSG00000115461	2.25716	6.5991e-06	1.05443	4.83378e-05
286	EFHD1	ENSG00000115468	4.64907	4.5806e-06	3.72727	8.3946e-49
287	COQ10B	ENSG00000115520	0.748598	0.0460525	0.712814	0.00851806
288	IL1R1	ENSG00000115594	2.2494	0.0354011	1.29254	0.000253992
289	MLPH	ENSG00000115648	1.35569	0.000253517	0.761284	0.00445598
290	ID2	ENSG00000115738	1.25428	0.0339212	1.55651	3.61229e-12
291	PLEKHB2	ENSG00000115762	0.955886	0.0427699	0.734694	0.00373486
292	RMDN2	ENSG00000115841	2.59075	0.0494354	1.41901	0.000515479
293	KYNU	ENSG00000115919	9.85892	0.00416215	3.78787	1.71134e-51
294	RND3	ENSG00000115963	1.26879	9.35354e-05	1.1921	0.000386132
295	TIA1	ENSG00000116001	1.00035	0.0360458	1.16756	9.90769e-06
296	PCYOX1	ENSG00000116005	1.32484	0.00263735	1.19102	4.98369e-05
297	NFE2L2	ENSG00000116044	1.53227	0.000137253	1.20278	0.000747679
298	TMEM59	ENSG00000116209	1.276	8.91867e-16	0.821591	1.24463e-07
299	ICMT	ENSG00000116237	0.655374	0.00170764	0.265937	0.0135989
300	KCNC4	ENSG00000116396	1.45312	0.00107157	0.779901	4.10594e-05
301	S100PBP	ENSG00000116497	1.68784	0.0399519	0.877498	4.23911e-05
302	RNF19B	ENSG00000116514	1.06232	0.0073224	0.690477	0.000102907
303	FBXO6	ENSG00000116663	1.04534	0.0447924	0.617687	0.00394011
304	IVNS1ABP	ENSG00000116679	1.56631	0.000576675	0.656859	0.000969024
305	SRSF11	ENSG00000116754	1.04004	0.0228599	1.04551	0.0103545
306	CRYZ	ENSG00000116791	1.72072	0.000135106	1.70071	9.14951e-06
307	CD58	ENSG00000116815	1.20731	0.00151685	1.22782	0.00215206
308	TSNAX	ENSG00000116918	0.926939	0.0391752	0.79008	0.0417629
309	RRAGC	ENSG00000116954	0.857827	0.0373596	0.815635	0.000201191
310	CTBS	ENSG00000117151	2.03235	0.00118146	1.47104	6.52443e-13
311	KLHL12	ENSG00000117153	0.929846	0.00439	0.661541	0.00127837
312	GBP3	ENSG00000117226	1.91935	4.01566e-05	1.54427	4.17694e-06
313	RAB29	ENSG00000117280	1.51495	3.03003e-06	1.08334	5.95964e-10
314	ID3	ENSG00000117318	3.98123	3.96739e-12	3.33222	2.45539e-46
315	CD46	ENSG00000117335	1.1934	0.00223604	1.1605	0.0131727
316	PIK3R3	ENSG00000117461	4.47839	0.00694942	1.00617	3.4658e-12
317	TMED5	ENSG00000117500	1.37136	0.00791234	1.22019	0.000643444
318	VAMP4	ENSG00000117533	1.53621	0.0249415	1.58631	3.94812e-08
319	RSRP1	ENSG00000117616	0.757688	0.00625923	0.610354	0.0274212
320	SLC35A3	ENSG00000117620	1.76871	0.044464	1.32663	0.00188762
321	MAN1C1	ENSG00000117643	12.2304	6.89961e-12	4.37406	2.3127e-58
322	C1orf54	ENSG00000118292	2.78997	7.9263e-09	1.18795	5.53662e-06
323	SLC22A18	ENSG00000118473	0.887742	0.000806614	1.21826	5.99492e-09
324	PKD2	ENSG00000118762	1.59726	1.32948e-05	1.37958	0.00102681
325	HS1BP3	ENSG00000118960	1.6146	0.00524798	0.706223	0.00023251
326	CCND2	ENSG00000118971	3.19253	9.48064e-20	2.90323	5.9052e-41
327	KLF9	ENSG00000119138	1.27841	0.0357868	0.655835	0.00873454
328	C1orf198	ENSG00000119280	1.15455	1.53848e-09	0.815889	1.02917e-14
329	ABITRAM	ENSG00000119328	0.912396	0.00361548	0.683486	0.00265033
330	RAB14	ENSG00000119396	0.907527	0.0201317	0.7985	0.00104605
331	RBM18	ENSG00000119446	1.03354	0.00481784	0.74476	0.00064736
332	ALG2	ENSG00000119523	1.04876	1.59129e-05	0.821642	0.000109184
333	KDSR	ENSG00000119537	1.47191	0.000906284	1.46932	2.91075e-14
334	IRF2BPL	ENSG00000119669	0.754326	0.00565863	0.490589	0.0164588
335	GPR68	ENSG00000119714	2.08631	1.91461e-11	1.46429	2.22805e-18
336	YPEL5	ENSG00000119801	0.796664	0.000222334	0.539681	0.010596
337	SLF2	ENSG00000119906	4.25098	0.0369676	0.77821	0.000386132
338	IFIT3	ENSG00000119917	4.56579	1.81638e-08	4.14138	3.50686e-123
339	IFIT2	ENSG00000119922	6.59531	1.45756e-06	4.53492	6.46315e-51
340	TCTN3	ENSG00000119977	0.922275	0.000222334	0.514018	4.01254e-05
341	DENND10	ENSG00000119979	1.09661	0.00422268	1.08664	0.000111135
342	GNA13	ENSG00000120063	1.74491	0.0492532	1.51712	0.00021713
343	MSX2	ENSG00000120149	1.42245	0.0286	1.11294	2.66987e-06
344	TEK	ENSG00000120156	11.0436	0.0394453	4.61352	1.41066e-25
345	TNFSF18	ENSG00000120337	2.2967	1.65921e-05	2.07838	3.17155e-26
346	NUDCD1	ENSG00000120526	1.10583	0.0453739	0.782308	0.00623028
347	PLXDC2	ENSG00000120594	7.90102	5.39495e-10	4.28661	2.64668e-104
348	UFM1	ENSG00000120686	1.05941	0.0117663	1.13974	0.00125656
349	ELF1	ENSG00000120690	2.14553	0.0106423	1.08627	0.0339998
350	HSPH1	ENSG00000120694	0.942044	0.0183753	0.652113	0.0450424
351	GLT8D2	ENSG00000120820	0.963616	0.0114792	0.393208	0.000476576
352	SOCS2	ENSG00000120833	3.39286	0.0020557	1.87486	3.48353e-19
353	EPHX2	ENSG00000120915	7.79673	1.68558e-07	2.91407	2.35134e-27
354	RNF170	ENSG00000120925	1.4643	5.01605e-05	1.27183	5.51962e-15
355	RDH10	ENSG00000121039	4.72784	6.95906e-10	2.50331	6.0391e-27
356	TRIM25	ENSG00000121060	2.32801	0.00752305	1.6891	1.67155e-33
357	SCPEP1	ENSG00000121064	1.82611	2.01374e-09	1.37057	2.46362e-11
358	TENT4B	ENSG00000121274	8.5855	0.00637179	1.7556	2.29429e-05
359	PLBD1	ENSG00000121316	5.42782	6.76303e-12	2.96382	2.56983e-48
360	PDZRN3	ENSG00000121440	3.65598	3.53049e-05	1.25899	2.959e-05
361	CRY2	ENSG00000121671	2.88156	0.00763952	0.671847	8.81302e-06
362	DEPDC7	ENSG00000121690	2.3256	5.8599e-05	1.74024	8.90481e-13
363	LRIF1	ENSG00000121931	1.98569	3.01427e-05	1.65845	3.14626e-05
364	ACVR2A	ENSG00000121989	4.64131	0.000306962	1.8622	4.5617e-10
365	FMOD	ENSG00000122176	3.70201	1.84989e-26	3.8655	3.28176e-155
366	PTGFR	ENSG00000122420	9.82144	0.0297632	2.60892	6.98694e-09
367	SEPTIN7	ENSG00000122545	2.61113	0.0150034	0.938842	0.0122791
368	EEPD1	ENSG00000122547	2.35924	0.000708041	1.27642	4.03712e-16
369	INHBA	ENSG00000122641	5.91218	0.0140693	3.04091	1.09725e-24
370	CALD1	ENSG00000122786	1.19642	6.97014e-08	0.959251	0.000443431
371	EGR2	ENSG00000122877	3.78169	0.00243306	2.69718	5.56675e-07
372	CIT	ENSG00000122966	10.858	0.00151635	1.12324	1.87187e-08
373	IFT81	ENSG00000122970	3.13978	0.00335393	0.769199	0.0213621
374	SSPN	ENSG00000123096	1.76011	0.0214582	0.89342	0.00862403
375	WWP1	ENSG00000123124	11.3671	0.00149982	0.781279	0.0374177
376	ITIH5	ENSG00000123243	4.67104	8.20879e-05	5.70374	7.5029e-187
377	IL13RA2	ENSG00000123496	8.41874	5.10701e-07	5.08846	6.53455e-132
378	METTL8	ENSG00000123600	2.2314	0.0110514	0.870117	6.66115e-07
379	NMI	ENSG00000123609	1.26326	0.0099417	1.1375	0.000159936
380	BATF3	ENSG00000123685	2.94049	0.00473246	1.97056	2.41364e-09
381	RAB38	ENSG00000123892	2.25097	2.0803e-06	2.01871	1.94205e-27
382	INHA	ENSG00000123999	1.93967	0.016938	1.12869	0.0209635
383	ZNFX1	ENSG00000124201	2.34797	0.00926886	1.38647	3.80762e-21
384	STX16	ENSG00000124222	1.18119	0.00096739	0.61506	2.82111e-05
385	PMEPA1	ENSG00000124225	2.76906	0.000140491	2.60281	6.49544e-32
386	RNF114	ENSG00000124226	0.983648	1.45756e-06	0.731418	1.35525e-09
387	ABCC4	ENSG00000125257	2.33637	0.0440614	1.57371	1.61672e-05
388	TM9SF2	ENSG00000125304	1.04629	0.0289969	1.02515	0.000452482
389	BMP4	ENSG00000125378	3.05646	9.02899e-27	2.90211	5.03378e-67
390	PANK2	ENSG00000125779	1.03859	0.0140693	0.688346	3.01441e-05
391	TMX4	ENSG00000125827	1.60551	9.35111e-06	1.1723	1.32661e-08
392	BMP2	ENSG00000125845	2.46696	2.27714e-06	2.1808	5.30472e-25
393	ID1	ENSG00000125968	2.44716	5.42701e-06	1.89519	5.7367e-05
394	THRA	ENSG00000126351	1.02466	0.000110297	0.351869	0.0133106
395	NR1D1	ENSG00000126368	3.73844	1.25562e-05	2.1224	1.2775e-22
396	IFI6	ENSG00000126709	5.2924	7.46728e-21	5.17578	8.16343e-57
397	SIX1	ENSG00000126778	1.16195	0.0112035	0.839205	0.00235186
398	ZBTB1	ENSG00000126804	1.33971	0.019083	0.934588	0.0116368
399	RHOT1	ENSG00000126858	3.2417	0.0256254	1.12471	0.000626257
400	TMEM35A	ENSG00000126950	1.81883	0.0196531	1.91757	8.92423e-18
401	CANX	ENSG00000127022	1.27204	0.000329229	1.08333	0.000394052
402	RAP1B	ENSG00000127314	0.808501	0.0486302	0.912651	0.0217775
403	HP1BP3	ENSG00000127483	1.037	0.00267503	0.776793	0.0013144
404	GNG11	ENSG00000127920	1.75708	0.000123462	2.05411	2.88361e-12
405	GNAI1	ENSG00000127955	1.03366	0.0106806	0.991953	0.00253776
406	SGCE	ENSG00000127990	1.35985	0.000106305	1.11014	1.13654e-06
407	SRD5A3	ENSG00000128039	0.94722	0.00373782	0.733868	0.000100022
408	MGAT3	ENSG00000128268	2.98635	0.000760864	2.33648	2.30721e-23
409	APOL3	ENSG00000128284	1.91943	0.0217308	1.6323	3.96803e-10
410	RNF112	ENSG00000128482	2.65401	0.00385583	0.915493	0.00376923
411	POT1	ENSG00000128513	11.1262	0.00209963	1.25655	0.000776102
412	MKLN1	ENSG00000128585	1.96134	0.00909487	0.717248	0.0236017
413	DNAJB9	ENSG00000128590	1.76926	1.44894e-06	1.68524	4.85367e-06
414	SMO	ENSG00000128602	4.89124	2.33364e-09	1.54592	3.62243e-15
415	HOXD1	ENSG00000128645	3.26523	0.00370256	2.84023	9.54767e-10
416	OSGEPL1	ENSG00000128694	4.81677	2.88735e-06	0.564501	0.0162942
417	SNRPN	ENSG00000128739	1.07992	1.9073e-11	0.39836	0.0390044
418	TWSG1	ENSG00000128791	1.3125	0.00768107	1.15313	0.00556769
419	CHAC1	ENSG00000128965	1.14558	1.42233e-06	0.678534	0.00568331
420	SLC44A2	ENSG00000129353	1.13496	8.18466e-06	0.720594	5.32096e-07
421	RAB2B	ENSG00000129472	1.73101	0.00055226	1.20836	3.30761e-06
422	CDO1	ENSG00000129596	3.64828	0.0064774	2.89126	4.5617e-10
423	ITFG1	ENSG00000129636	1.25935	0.000243289	1.0333	0.000170446
424	CDKN1C	ENSG00000129757	2.29122	0.0226202	0.841412	0.0248491
425	LRCH2	ENSG00000130224	10.5966	0.0418799	2.09927	3.80498e-08
426	BST2	ENSG00000130303	7.56209	1.96638e-15	9.35772	5.70283e-73
427	SLC27A1	ENSG00000130304	2.67294	0.00371558	0.709095	0.0150516
428	HELZ2	ENSG00000130589	3.91934	0.00267503	1.86112	4.01136e-27
429	ZNF337	ENSG00000130684	1.03574	0.00113347	0.52814	0.00275858
430	CLIP1	ENSG00000130779	2.48831	0.0112705	0.899247	0.0150672
431	SHFL	ENSG00000130813	2.05793	8.29992e-06	1.31343	1.05674e-09
432	ZNF426	ENSG00000130818	8.05057	0.00961398	0.499167	0.00660163
433	ZNF331	ENSG00000130844	2.33798	0.00646045	0.997079	2.04956e-06
434	C1QL1	ENSG00000131094	2.15637	0.000788318	1.19839	0.00146498
435	ANKHD1	ENSG00000131503	2.29503	0.00760512	0.864492	0.000133224
436	NDFIP1	ENSG00000131507	0.668654	0.00413721	0.485723	0.0123139
437	TMEM204	ENSG00000131634	1.42399	1.21106e-06	1.05119	6.24202e-05
438	PRKAB2	ENSG00000131791	4.72738	0.0137754	0.944709	0.00181431
439	TRIM21	ENSG00000132109	1.4138	0.0175991	0.924476	1.21394e-07
440	TRIM5	ENSG00000132256	2.07144	0.000204964	1.67232	7.17271e-10
441	TRIM22	ENSG00000132274	1.82293	8.40575e-06	1.7811	2.54661e-08
442	RAMP1	ENSG00000132329	3.71364	4.54989e-07	1.20087	0.00739512
443	TMEM128	ENSG00000132406	1.15099	0.000556005	1.1794	2.74329e-05
444	SLC52A1	ENSG00000132517	11.3539	9.64688e-06	3.20831	1.04168e-21
445	MTSS2	ENSG00000132613	1.5538	0.0268365	0.920113	1.25833e-14
446	SNAP25	ENSG00000132639	3.3063	2.46723e-07	2.57999	1.35623e-13
447	SYT11	ENSG00000132718	2.51048	5.70941e-16	2.25226	5.40525e-75
448	VSTM2L	ENSG00000132821	4.09535	0.0118512	1.17936	0.0218828
449	SERINC3	ENSG00000132824	0.79139	0.0006043	0.450553	0.0240107
450	ZMYM5	ENSG00000132950	1.9709	0.0213749	1.16593	0.00116968
451	DSTYK	ENSG00000133059	6.22969	5.6375e-06	0.81607	7.89893e-05
452	SLC41A1	ENSG00000133065	1.8314	0.00137044	1.19181	7.92177e-12
453	SPART	ENSG00000133104	1.27333	0.000138621	1.02388	0.00651462
454	EPSTI1	ENSG00000133106	3.44281	0.00110534	2.47605	1.69039e-52
455	POSTN	ENSG00000133110	3.40682	0.00209963	1.91911	5.91346e-10
456	PDE6B	ENSG00000133256	4.90119	0.00330279	4.72261	9.16628e-13
457	RTN3	ENSG00000133318	0.875089	1.79347e-09	0.511229	4.58848e-05
458	PLAAT4	ENSG00000133321	3.88247	0.00424104	2.58453	3.88854e-07
459	ACTR3B	ENSG00000133627	3.70422	0.0391414	1.30469	7.21114e-20
460	BTG1	ENSG00000133639	1.93337	2.78407e-06	2.08936	3.38868e-16
461	TMTC1	ENSG00000133687	1.93672	1.91337e-05	1.78511	8.06519e-09
462	SARAF	ENSG00000133872	0.801192	1.40224e-06	0.490797	0.0392826
463	DGLUCY	ENSG00000133943	1.28179	0.00521934	0.884574	8.59927e-08
464	EMC7	ENSG00000134153	0.697637	3.88227e-05	0.561789	0.0115084
465	TRIM45	ENSG00000134253	2.39647	0.00562495	0.844669	3.29195e-06
466	CEPT1	ENSG00000134255	1.2408	0.029261	1.50588	0.012805
467	NAPG	ENSG00000134265	0.858631	0.0176044	0.703703	0.000385932
468	SLC38A2	ENSG00000134294	1.44716	0.00568537	1.43522	0.000437022
469	YWHAQ	ENSG00000134308	0.605212	0.0457509	0.554644	0.0191063
470	RSAD2	ENSG00000134321	12.6927	3.84275e-05	11.0037	3.5394e-13
471	CMPK2	ENSG00000134326	12.5799	2.22991e-05	8.42364	2.26936e-37
472	GRP	ENSG00000134443	3.45495	1.05379e-09	3.12013	3.2254e-29
473	DDB2	ENSG00000134574	1.0476	0.00194276	0.520271	0.0226603
474	CYP2J2	ENSG00000134716	10.1207	0.00467092	2.74684	9.98742e-18
475	DTNA	ENSG00000134769	3.49528	0.00329697	1.08433	1.02733e-07
476	PDGFRA	ENSG00000134853	2.02937	0.00196368	1.45801	7.24846e-06
477	ERCC5	ENSG00000134899	1.2415	0.00024594	0.285152	0.0199661
478	WDR36	ENSG00000134987	10.8516	0.0261535	0.785917	0.0034792
479	RFK	ENSG00000135002	1.03926	0.0293219	1.11033	0.00166397
480	UBQLN1	ENSG00000135018	0.735351	0.0345765	0.498956	0.0101011
481	ANXA1	ENSG00000135046	0.645581	0.00136617	0.457107	0.0119196
482	GOLM1	ENSG00000135052	1.05788	0.000211224	0.666789	4.698e-06
483	ISCA1	ENSG00000135070	0.689721	0.0131313	0.405347	0.020052
484	OASL	ENSG00000135114	11.5822	0.000421182	8.26291	5.4146e-23
485	CD36	ENSG00000135218	10.4627	6.54556e-06	4.30505	8.86453e-35
486	COQ10A	ENSG00000135469	1.5371	0.000546117	0.773331	4.97018e-07
487	FAIM2	ENSG00000135472	5.65291	6.84969e-07	2.79652	8.47849e-32
488	PAN2	ENSG00000135473	2.18877	0.0114984	0.670245	0.00175052
489	GNS	ENSG00000135677	1.07823	1.91337e-05	0.844884	2.91014e-05
490	MPHOSPH6	ENSG00000135698	1.31681	0.0156664	0.810866	0.0016693
491	NIBAN1	ENSG00000135842	13.0666	5.26242e-15	1.1523	8.20419e-05
492	SP110	ENSG00000135899	1.85169	0.00829104	1.33681	7.64628e-30
493	SERPINE2	ENSG00000135919	1.98472	9.22927e-05	2.6946	5.93913e-45
494	TMBIM1	ENSG00000135926	1.00401	0.000115229	0.635167	4.96903e-07
495	EPC2	ENSG00000135999	5.84251	0.00803089	0.856457	0.0305767
496	ISCU	ENSG00000136003	0.71535	3.09034e-07	0.440116	0.0013639
497	RCBTB1	ENSG00000136144	2.64224	0.0498566	1.46349	0.000428501
498	COG3	ENSG00000136152	2.60866	0.00514486	0.887421	0.00164946
499	LMO7	ENSG00000136153	2.92031	0.00599086	0.832054	0.012805
500	ITM2B	ENSG00000136156	1.30965	2.87934e-07	1.21389	4.2258e-06
501	SPRY2	ENSG00000136158	1.46064	0.00263355	1.71513	1.03957e-10
502	SETDB2	ENSG00000136169	1.33619	0.00136295	0.779909	2.97196e-05
503	SCRN1	ENSG00000136193	0.867512	0.00103016	0.606531	0.00965616
504	GPNMB	ENSG00000136235	1.92346	6.56114e-10	2.08108	5.91559e-34
505	NUP42	ENSG00000136243	0.997827	0.00584304	0.496492	0.00215132
506	ADAMTS7	ENSG00000136378	1.34698	0.033321	0.926802	2.46872e-07
507	CALCOCO2	ENSG00000136436	0.914945	3.28623e-06	0.502803	9.77816e-06
508	RTP4	ENSG00000136514	3.15695	0.00223126	2.75634	1.21318e-15
509	GALNT5	ENSG00000136542	1.96068	6.17521e-09	1.577	3.0571e-10
510	HS6ST1	ENSG00000136720	0.799335	0.0082571	0.33194	0.0101793
511	TOR1B	ENSG00000136816	1.40309	7.36095e-05	0.953275	1.76372e-08
512	SMC2	ENSG00000136824	9.68527	0.0338558	0.665831	0.0122435
513	KLF4	ENSG00000136826	1.05793	0.00422369	0.852986	0.00302347
514	GABBR2	ENSG00000136928	12.2274	0.000102731	5.51542	9.54697e-62
515	ENPP2	ENSG00000136960	1.4764	0.00211932	1.23988	0.000252099
516	CCN3	ENSG00000136999	2.24263	0.000282989	2.92082	2.30721e-23
517	GMPR	ENSG00000137198	2.98377	0.0432936	0.942327	0.00246053
518	MGARP	ENSG00000137463	1.10189	0.000136576	0.641494	0.0282267
519	ANKRD42	ENSG00000137494	1.36779	0.0143012	0.814576	4.43872e-05
520	CCDC90B	ENSG00000137500	0.97983	0.00493925	0.959479	0.00266455
521	SYTL2	ENSG00000137501	2.12802	0.0129591	1.78995	7.65422e-05
522	PRCP	ENSG00000137509	0.728051	0.0025691	0.517061	0.000164997
523	GGH	ENSG00000137563	0.797253	0.00375704	0.53536	0.0220206
524	SULF1	ENSG00000137573	12.8478	3.96113e-10	4.39462	1.18284e-44
525	SDCBP	ENSG00000137575	1.0183	0.0489618	1.05811	0.00713495
526	DDX60	ENSG00000137628	12.2615	1.50191e-07	3.81945	2.34686e-19
527	CFAP300	ENSG00000137691	1.57917	0.0361732	1.61834	1.75924e-05
528	YAP1	ENSG00000137693	1.44366	0.00540018	1.34127	9.4574e-05
529	CFAP68	ENSG00000137720	0.937044	0.0436877	0.799082	0.00020798
530	CASP1	ENSG00000137752	2.60104	7.6451e-08	2.2765	2.66939e-82
531	THBS1	ENSG00000137801	1.52883	5.74562e-07	1.35806	0.0014838
532	ITGA11	ENSG00000137809	4.00419	6.80544e-07	2.10487	1.08315e-34
533	TMEM62	ENSG00000137842	1.8723	0.0149262	0.827041	1.66363e-06
534	ADAM10	ENSG00000137845	1.09238	0.0251081	1.26063	0.000541895
535	IFI44	ENSG00000137965	8.1278	6.15682e-07	5.05691	1.44522e-82
536	CLCA2	ENSG00000137975	10.5574	0.0489327	2.82589	1.64167e-14
537	CGREF1	ENSG00000138028	10.9346	7.84913e-09	2.3163	7.24663e-19
538	PNPT1	ENSG00000138035	1.94178	0.00512899	1.61593	4.90625e-10
539	DYNC2LI1	ENSG00000138036	1.1432	0.000447159	0.635768	0.000831371
540	CYP1B1	ENSG00000138061	2.53222	1.67354e-07	2.91316	4.77931e-10
541	RAB1A	ENSG00000138069	0.593727	0.0220263	0.55488	0.0419622
542	STAMBPL1	ENSG00000138134	0.796347	0.0172762	0.3159	0.0485304
543	ATAD1	ENSG00000138138	1.33427	0.0133448	0.858297	0.00210926
544	CALHM2	ENSG00000138172	0.736995	0.00491235	0.338335	0.0331861
545	ENTPD1	ENSG00000138185	9.81832	0.000134265	1.49575	5.19287e-18
546	SLC40A1	ENSG00000138449	7.26508	0.000283167	3.0085	4.12701e-14
547	PARP9	ENSG00000138496	12.6853	1.42363e-14	2.80115	3.96606e-40
548	APH1B	ENSG00000138613	0.815655	0.0361732	0.614172	0.000386132
549	ARHGAP24	ENSG00000138639	1.82775	0.00486191	1.13742	1.67672e-06
550	HERC6	ENSG00000138642	14.4229	0.000167689	4.37124	9.0897e-118
551	HERC5	ENSG00000138646	12.4578	0.000115886	5.94419	3.47643e-73
552	FGF2	ENSG00000138685	2.02232	2.71321e-09	2.20062	6.69075e-16
553	NAAA	ENSG00000138744	1.34463	0.00070247	1.44635	2.24114e-22
554	SCARB2	ENSG00000138760	1.01774	4.66982e-05	0.838122	7.06608e-12
555	SHROOM3	ENSG00000138771	3.6526	0.00314946	1.25717	4.80528e-08
556	ANXA3	ENSG00000138772	3.55115	0.000354304	1.52842	7.07881e-07
557	CASP6	ENSG00000138794	0.825826	0.0127741	0.527125	0.0136813
558	SLC39A8	ENSG00000138821	3.96009	0.00266071	2.9448	7.25012e-18
559	CPNE8	ENSG00000139117	9.45921	0.0440217	1.81988	3.53813e-06
560	PRICKLE1	ENSG00000139174	3.89915	0.0089024	1.71294	6.32722e-07
561	C1RL	ENSG00000139178	1.72642	0.00329084	0.797975	4.1446e-06
562	AMIGO2	ENSG00000139211	2.30847	0.00104656	2.17697	2.9187e-15
563	LRIG3	ENSG00000139263	2.15947	0.0203236	1.10715	0.000499919
564	PHLDA1	ENSG00000139289	1.40094	0.00130946	1.31522	1.51242e-11
565	TMEM19	ENSG00000139291	1.50977	0.00273433	1.55525	3.87514e-07
566	MTMR6	ENSG00000139505	1.2617	0.0480424	1.01292	0.00713594
567	SLC46A3	ENSG00000139508	4.81134	0.000289893	1.98567	3.5843e-20
568	KANSL2	ENSG00000139620	1.05117	0.0490706	0.285899	0.0240964
569	TMBIM6	ENSG00000139644	0.53723	0.00403649	0.198924	0.00674944
570	LPAR6	ENSG00000139679	1.16375	0.0387253	1.24917	8.37022e-05
571	NOVA1	ENSG00000139910	1.30144	0.0282608	1.17026	1.65874e-09
572	FRMD6	ENSG00000139926	1.10783	0.0208074	0.964594	0.041651
573	ARMH4	ENSG00000139971	2.00938	0.0496442	1.0658	0.000451224
574	LYSMD2	ENSG00000140280	1.3696	0.042543	1.24075	1.7107e-06
575	BNIP2	ENSG00000140299	0.900786	0.0422162	0.796776	0.0141973
576	TSPAN3	ENSG00000140391	0.819659	0.000191675	0.690244	5.0344e-08
577	IGF1R	ENSG00000140443	2.94993	0.0222708	0.784173	0.00590009
578	ARRDC4	ENSG00000140450	1.98138	0.00138665	1.86819	7.21998e-07
579	BBS4	ENSG00000140463	2.08475	0.0351613	0.767445	3.7493e-07
580	MFGE8	ENSG00000140545	1.03121	4.93048e-13	0.573645	0.0164661
581	GALNS	ENSG00000141012	0.795876	0.0413108	0.352874	0.0258584
582	TOB1	ENSG00000141232	1.42911	2.50042e-05	1.32266	0.00161187
583	SS18	ENSG00000141380	1.30942	0.000447836	0.95028	1.28954e-06
584	SLC39A6	ENSG00000141424	1.92561	0.0101105	1.59021	5.09369e-05
585	OSBPL1A	ENSG00000141447	1.55603	0.00930376	1.10291	4.49648e-07
586	SECTM1	ENSG00000141574	2.29635	5.08319e-06	2.40232	3.37056e-17
587	CBX4	ENSG00000141582	1.4397	0.00468835	0.652901	1.38882e-07
588	SMAD4	ENSG00000141646	1.3309	0.044927	0.5736	0.0263959
589	CACNA1A	ENSG00000141837	10.0785	0.00176618	2.6756	9.59938e-26
590	IFITM3	ENSG00000142089	1.09089	0.000569701	0.896769	0.00653128
591	ADAMTS10	ENSG00000142303	9.63557	0.0011167	0.88979	0.000153426
592	SLC47A1	ENSG00000142494	11.8349	2.29385e-06	4.89	2.19849e-66
593	ITGB3BP	ENSG00000142856	1.06016	0.0406404	0.688233	0.0339977
594	PIGK	ENSG00000142892	1.29811	0.000147918	1.29083	0.000334465
595	AZIN2	ENSG00000142920	3.82761	0.000251539	1.32365	8.63104e-14
596	LMO4	ENSG00000143013	1.03906	0.0170051	0.625853	2.18388e-05
597	SYPL2	ENSG00000143028	3.86897	0.000348123	2.67911	9.05822e-57
598	CREG1	ENSG00000143162	2.04841	2.22736e-12	1.95531	1.61863e-22
599	TMCO1	ENSG00000143183	0.532948	0.0314897	0.475202	0.0350347
600	DPT	ENSG00000143196	4.64273	3.31196e-06	4.24284	4.76423e-53
601	TOR1AIP1	ENSG00000143337	1.12796	0.00493679	1.01761	0.0105632
602	ECM1	ENSG00000143369	1.22002	2.17217e-10	0.748777	0.000565632
603	RFX5	ENSG00000143390	1.2993	0.0165765	0.514837	0.0126371
604	CERS2	ENSG00000143418	0.627054	0.00145385	0.472621	0.041383
605	GOLPH3L	ENSG00000143457	0.968427	0.0186688	0.672768	0.0175472
606	ATP8B2	ENSG00000143515	1.16945	0.0126082	0.629875	0.0184732
607	SLC27A3	ENSG00000143554	1.42394	0.0114983	0.724348	0.0116575
608	RIT1	ENSG00000143622	0.702032	0.0459686	0.610555	0.00565555
609	WNT9A	ENSG00000143816	3.11024	0.0129708	1.23463	2.37089e-13
610	EPHX1	ENSG00000143819	1.28912	7.34068e-20	0.897272	9.22057e-05
611	PPFIA4	ENSG00000143847	2.36898	0.000875451	2.31575	1.53167e-28
612	ETAA1	ENSG00000143971	3.61729	0.0220906	1.2418	0.00236918
613	MEIS1	ENSG00000143995	0.91902	0.0200393	0.914108	0.000158148
614	ZNF514	ENSG00000144026	1.61471	0.025392	0.468532	0.000117784
615	THNSL2	ENSG00000144115	9.91634	0.00211932	2.43607	7.40796e-10
616	FBLN7	ENSG00000144152	1.64792	0.00127745	0.718261	2.61862e-06
617	SCRN3	ENSG00000144306	1.47633	0.0152085	1.36142	0.000839518
618	RHBDD1	ENSG00000144468	1.23866	0.0152744	0.359823	0.0280462
619	ACKR3	ENSG00000144476	4.90791	3.73095e-08	5.46867	1.42448e-78
620	ATP10D	ENSG00000145246	7.38201	2.71349e-10	0.948388	0.0330488
621	SCD5	ENSG00000145284	2.62802	2.71951e-11	2.64918	1.37365e-29
622	SNCA	ENSG00000145335	2.21044	4.19617e-08	2.05732	1.9255e-31
623	TBCK	ENSG00000145348	2.84932	0.0165649	0.540513	0.0417666
624	ANK2	ENSG00000145362	6.3926	0.0168662	1.99881	1.45181e-10
625	METTL14	ENSG00000145388	1.31023	0.027168	1.13227	0.000291652
626	USP53	ENSG00000145390	1.77712	0.00371558	1.22315	0.00926691
627	CBR4	ENSG00000145439	1.18057	0.0121258	0.998774	9.66901e-05
628	PIK3R1	ENSG00000145675	10.7295	0.000342639	2.0534	2.3183e-09
629	HAPLN1	ENSG00000145681	10.2123	0.00695445	5.94032	5.75918e-25
630	SSBP2	ENSG00000145687	1.34483	0.00213817	0.832368	3.74515e-05
631	RASA1	ENSG00000145715	1.44436	1.33825e-05	1.07253	0.00417728
632	ADAMTS19	ENSG00000145808	6.42406	7.24132e-05	2.42593	1.24616e-12
633	C1QTNF2	ENSG00000145861	2.70808	2.69559e-05	1.60226	1.70677e-10
634	IGFBP3	ENSG00000146674	4.19986	6.11495e-11	4.54885	5.51554e-162
635	TRIM4	ENSG00000146833	1.27186	0.0268523	0.651338	0.015065
636	TMEM209	ENSG00000146842	3.55554	0.00562495	1.87783	1.51892e-05
637	TMEM140	ENSG00000146859	2.79724	8.99284e-08	1.97253	1.14704e-39
638	SLC25A37	ENSG00000147454	1.01149	0.00172275	0.819562	2.27137e-08
639	NSD3	ENSG00000147548	1.35634	0.00263344	0.828941	0.000233929
640	LACTB2	ENSG00000147592	1.67328	0.00331413	1.27897	9.66134e-06
641	TERF1	ENSG00000147601	0.952314	0.042566	0.879018	4.315e-06
642	MTDH	ENSG00000147649	0.943283	0.0136088	0.842699	0.0150856
643	LRP12	ENSG00000147650	3.68587	0.00440241	1.50796	0.00547101
644	EBAG9	ENSG00000147654	1.165	0.0104562	0.8841	0.000224292
645	AK3	ENSG00000147853	1.29001	0.000459838	1.1409	3.46344e-07
646	PLIN2	ENSG00000147872	0.998046	1.16897e-09	0.657336	5.29664e-11
647	AUH	ENSG00000148090	1.80053	0.00746586	1.01234	0.00384491
648	MFSD14B	ENSG00000148110	1.21181	0.00299307	1.06989	0.0033989
649	AOPEP	ENSG00000148120	2.2115	8.18466e-06	1.09092	3.04118e-09
650	STOM	ENSG00000148175	2.02846	6.69017e-07	1.79883	6.62428e-67
651	MINDY3	ENSG00000148481	0.987531	0.0344941	0.61665	0.0423343
652	BTBD10	ENSG00000148925	0.899502	0.00291121	0.527415	0.0207604
653	HSD17B12	ENSG00000149084	1.25773	0.0192442	1.43302	0.000747582
654	PAMR1	ENSG00000149090	1.0981	0.0115841	0.805043	6.09808e-11
655	SERPING1	ENSG00000149131	1.63469	4.1736e-12	1.15433	4.28119e-08
656	CCDC82	ENSG00000149231	1.51508	0.0295057	1.38067	0.00027688
657	AASDHPPT	ENSG00000149313	0.99719	0.0290325	1.0034	0.00338197
658	P4HA3	ENSG00000149380	2.36716	4.88706e-09	1.12585	8.01045e-11
659	FADS1	ENSG00000149485	1.39278	0.00269063	1.30378	1.11491e-12
660	FEZ1	ENSG00000149557	0.875847	1.88771e-05	0.46624	0.00958989
661	DUSP15	ENSG00000149599	1.94931	0.0139146	2.04722	8.44434e-05
662	MRPL49	ENSG00000149792	0.624642	0.00303429	0.242375	0.0421147
663	MMP3	ENSG00000149968	2.01192	0.0189066	3.11517	8.48724e-87
664	MKX	ENSG00000150051	10.7588	0.0176548	2.69106	1.92029e-12
665	HNMT	ENSG00000150540	1.81831	0.000643057	1.19327	2.31753e-06
666	PDCD4	ENSG00000150593	1.25814	8.69566e-07	0.99254	8.23325e-07
667	CCDC102B	ENSG00000150636	3.02741	9.87069e-07	2.09304	1.33352e-18
668	DLAT	ENSG00000150768	0.856601	0.0351604	0.683302	0.0471657
669	SLC7A11	ENSG00000151012	1.91607	2.14504e-06	1.73991	3.35912e-12
670	TWF1	ENSG00000151239	1.04722	0.0473146	1.18033	0.0174726
671	MBIP	ENSG00000151332	1.50233	0.00346912	0.819054	0.000477997
672	EPS8	ENSG00000151491	1.31155	0.00166635	1.08449	0.00541319
673	AKR1C2	ENSG00000151632	3.24587	0.000820065	2.05274	3.39167e-11
674	SLC25A4	ENSG00000151729	1.72768	0.00104656	0.874899	2.98382e-10
675	PARP8	ENSG00000151883	2.16014	0.0343088	3.0467	1.81855e-24
676	KCNE4	ENSG00000152049	2.72288	3.07068e-05	2.37696	1.47142e-11
677	CCDC74B	ENSG00000152076	2.40385	0.00541671	1.2778	3.31117e-06
678	HSPB8	ENSG00000152137	2.54264	4.03488e-10	2.35374	3.22555e-52
679	TMEM178A	ENSG00000152154	1.18976	0.00491235	1.37973	3.82034e-16
680	SPOCK1	ENSG00000152377	2.67067	0.00249656	2.05254	9.0068e-22
681	ZFP36L2	ENSG00000152518	0.959327	0.00565863	0.942046	0.00230405
682	TMEM123	ENSG00000152558	1.72929	9.17202e-06	1.87367	3.65491e-06
683	GPR180	ENSG00000152749	1.87837	0.0437635	0.957904	0.0330949
684	IFIT5	ENSG00000152778	1.89863	0.000884227	1.36787	7.35091e-17
685	RAD17	ENSG00000152942	10.3011	0.00811457	0.977979	0.00329944
686	STK32B	ENSG00000152953	3.37441	0.0012237	1.35363	3.53981e-14
687	MR1	ENSG00000153029	1.49964	4.9807e-05	1.26245	1.0432e-11
688	SCOC	ENSG00000153130	1.47721	0.0317401	1.65846	0.00240707
689	CETN3	ENSG00000153140	1.19187	0.0123886	0.894911	0.0148551
690	SMARCA5	ENSG00000153147	1.5229	0.0113146	0.807572	0.00260817
691	SGIP1	ENSG00000153250	1.93376	0.000807279	0.947242	0.00151425
692	TRAPPC8	ENSG00000153339	10.1766	0.0246832	1.23043	0.0141672
693	LURAP1L	ENSG00000153714	1.69561	3.70322e-10	1.16461	1.4949e-09
694	IMPACT	ENSG00000154059	1.29946	0.000743533	0.931387	0.00240042
695	ABI3BP	ENSG00000154175	10.7119	3.18355e-06	3.71294	2.14998e-19
696	CEP112	ENSG00000154240	5.03774	0.00874621	0.338285	0.0464726
697	UCHL1	ENSG00000154277	0.860112	2.14005e-06	0.612598	0.00441897
698	MIA3	ENSG00000154305	1.7911	0.0336769	0.598176	2.1076e-05
699	PGM5	ENSG00000154330	10.7456	0.000218973	1.6254	4.08438e-19
700	PDE1C	ENSG00000154678	8.07485	6.89961e-12	4.22462	1.56397e-84
701	JAM2	ENSG00000154721	6.25775	2.88897e-05	3.50446	7.8667e-39
702	APCDD1	ENSG00000154856	2.50053	9.94374e-08	2.60258	3.51982e-117
703	CYP2U1	ENSG00000155016	3.08308	0.00335862	1.38715	9.35107e-09
704	KLF10	ENSG00000155090	2.34013	4.03488e-10	2.14857	2.777e-08
705	PIP4P2	ENSG00000155099	1.03323	0.0232028	0.847525	0.00144827
706	SLC25A28	ENSG00000155287	0.928891	0.000614983	0.707262	0.00118148
707	GRIA1	ENSG00000155511	3.63088	0.0180687	1.50912	6.9231e-34
708	DEPTOR	ENSG00000155792	10.9524	0.000322709	2.75817	8.4321e-17
709	TMBIM4	ENSG00000155957	1.02426	0.00149566	1.00604	0.000380227
710	CLIC2	ENSG00000155962	11.5927	4.92702e-05	6.44982	1.58018e-31
711	MMP16	ENSG00000156103	2.99685	0.0368849	2.57288	1.10217e-14
712	KCNMA1	ENSG00000156113	2.28031	2.81517e-09	2.03181	1.66846e-17
713	DPY19L4	ENSG00000156162	3.28723	0.0351613	1.74541	0.000430884
714	WHAMM	ENSG00000156232	3.90579	0.0126714	0.831689	4.27994e-05
715	GDF6	ENSG00000156466	2.69282	0.0285405	2.88023	4.99211e-15
716	MTERF3	ENSG00000156469	0.851322	0.0122274	0.500843	0.0289348
717	KCNS2	ENSG00000156486	3.21494	0.00553608	2.22704	3.54306e-17
718	UBE2L6	ENSG00000156587	1.73651	1.83857e-09	1.41726	9.64174e-16
719	SAMD8	ENSG00000156671	1.89611	0.00202222	1.09405	4.95859e-05
720	BAG4	ENSG00000156735	2.09425	0.0257163	0.704906	0.0245101
721	FBXO32	ENSG00000156804	3.7584	0.00952996	1.62891	2.8637e-15
722	MFSD14A	ENSG00000156875	1.17211	0.0116814	0.938932	0.0162893
723	MPV17L	ENSG00000156968	0.763347	0.0482388	2.30823	4.04931e-11
724	ODR4	ENSG00000157181	1.2624	0.0120543	1.10408	0.00165161
725	FZD1	ENSG00000157240	1.61938	0.000822458	1.54223	1.21801e-09
726	ARSL	ENSG00000157399	4.07042	0.00377126	1.86866	2.82846e-20
727	RNF111	ENSG00000157450	4.23852	0.0237231	0.972227	0.0327173
728	KCNJ6	ENSG00000157542	10.5244	0.00363335	5.13183	2.53542e-117
729	MX1	ENSG00000157601	6.38688	3.98505e-05	5.463	2.53408e-169
730	RAB28	ENSG00000157869	1.03478	0.00570196	0.56223	0.0181142
731	CFAP251	ENSG00000158023	2.18148	0.0335504	0.557367	5.47694e-05
732	PRXL2C	ENSG00000158122	0.875603	0.0121956	0.571884	0.00490006
733	COLEC12	ENSG00000158270	2.74789	0.0255218	2.38033	1.73351e-20
734	GPR153	ENSG00000158292	1.41444	0.0140237	0.435354	0.00644397
735	H4C8	ENSG00000158406	2.60902	0.000685013	1.61616	9.77949e-10
736	ALG8	ENSG00000159063	0.858654	0.0071348	0.395369	0.0256258
737	PAXBP1	ENSG00000159086	4.43771	0.0266206	0.897459	0.00442078
738	STC1	ENSG00000159167	1.34802	0.0437635	1.03279	3.49436e-09
739	CIART	ENSG00000159208	2.66657	8.8879e-11	2.10051	4.50999e-24
740	BTG2	ENSG00000159388	1.66266	3.10012e-10	1.31723	4.31333e-11
741	C1R	ENSG00000159403	3.0253	0.000588726	2.9647	5.13772e-51
742	ACE	ENSG00000159640	1.73657	0.00389062	0.880217	2.66799e-10
743	EFCAB14	ENSG00000159658	0.90167	0.0266509	0.561038	0.0321457
744	PLPP7	ENSG00000160539	1.0815	0.0227665	0.700775	0.0267874
745	ADAR	ENSG00000160710	1.35805	0.00314388	0.948857	2.04074e-14
746	PTGER1	ENSG00000160951	2.24106	8.73878e-06	2.00596	8.0511e-11
747	MRNIP	ENSG00000161010	0.983438	0.0295754	0.569499	0.000182075
748	FBXO27	ENSG00000161243	1.98744	0.000526732	1.27179	6.88173e-06
749	CXCL16	ENSG00000161921	2.98868	3.02334e-05	1.90108	7.80776e-18
750	PLPP3	ENSG00000162407	2.50839	1.69343e-05	3.18742	2.03917e-22
751	KLHL21	ENSG00000162413	0.950048	0.000301893	0.426074	0.00441627
752	PDPN	ENSG00000162493	1.45077	1.02888e-05	0.818348	3.39562e-08
753	LAPTM5	ENSG00000162511	10.8067	1.69343e-05	3.30371	2.80024e-22
754	RBBP4	ENSG00000162521	0.976938	0.00863414	0.673652	0.0282977
755	TMCO4	ENSG00000162542	1.28857	0.0076937	0.628785	0.00130218
756	MEGF6	ENSG00000162591	3.24703	0.000622096	0.76553	0.006268
757	DNAI3	ENSG00000162643	11.0553	0.00336619	1.35782	2.55014e-08
758	GBP2	ENSG00000162645	10.567	8.32694e-05	1.92453	3.12889e-13
759	ATXN7L2	ENSG00000162650	1.50587	0.0237369	0.864931	1.43586e-05
760	EXTL2	ENSG00000162694	1.39322	1.42233e-06	1.07711	0.00277723
761	OLFML2B	ENSG00000162745	3.22204	3.87261e-05	1.72353	1.81564e-24
762	KLHDC9	ENSG00000162755	3.00901	9.03562e-05	1.5482	5.4104e-06
763	C1orf115	ENSG00000162817	0.899894	0.0110514	0.412682	0.00867881
764	BROX	ENSG00000162819	1.64392	0.0138563	1.15731	0.000442153
765	OXER1	ENSG00000162881	2.72469	4.83598e-05	2.35586	4.09147e-09
766	HAAO	ENSG00000162882	2.73318	3.82318e-08	1.63251	8.24959e-08
767	B3GALNT2	ENSG00000162885	1.74099	0.0329783	0.786303	0.000181054
768	SANBR	ENSG00000162929	1.1536	3.78553e-05	1.44079	9.66134e-06
769	SLC66A3	ENSG00000162976	1.24045	7.89912e-05	1.25274	2.04709e-07
770	LRATD1	ENSG00000162981	2.28503	1.08579e-10	2.49952	1.10297e-49
771	CCDC74A	ENSG00000163040	1.26795	0.000744991	1.10095	5.10493e-05
772	SGCB	ENSG00000163069	0.952751	2.86304e-06	0.759869	8.15371e-06
773	INHBB	ENSG00000163083	2.04406	1.38772e-07	1.56021	2.30335e-17
774	SMARCAD1	ENSG00000163104	10.3922	0.000329812	1.44498	0.00177
775	CTSS	ENSG00000163131	2.8055	0.0109155	2.23238	9.06913e-32
776	DCAF16	ENSG00000163257	1.86011	0.00752592	0.746489	0.0237273
777	GNPDA2	ENSG00000163281	1.67985	0.0170051	1.19299	0.000339845
778	SLC22A15	ENSG00000163393	9.32292	8.96146e-06	1.99854	1.18455e-12
779	IGFBP7	ENSG00000163453	1.87356	1.83857e-09	1.16373	5.19806e-15
780	IFI16	ENSG00000163565	1.44332	0.00313984	1.18399	3.35205e-10
781	PPM1K	ENSG00000163644	1.77521	0.00035248	1.7188	3.31417e-07
782	SMIM14	ENSG00000163683	1.43971	0.00195827	1.58594	4.62636e-07
783	SNRK	ENSG00000163788	11.1443	0.0151243	1.5183	0.000142415
784	DTX3L	ENSG00000163840	3.92989	0.025561	1.70498	1.18271e-26
785	UVSSA	ENSG00000163945	1.47606	0.014219	0.945313	6.68589e-11
786	SGMS2	ENSG00000164023	2.19086	0.0499321	1.27413	0.0022098
787	SPRY1	ENSG00000164056	2.61567	1.83259e-06	1.90466	3.16388e-08
788	HSPA4L	ENSG00000164070	4.90701	0.0363523	1.68218	2.36872e-07
789	PRSS12	ENSG00000164099	1.24923	0.00113946	0.344317	0.0402774
790	FBXO8	ENSG00000164117	1.20978	0.00533073	0.987454	0.00146898
791	GASK1B	ENSG00000164125	1.8451	3.96141e-06	1.77642	8.99451e-07
792	EDIL3	ENSG00000164176	11.4055	0.00139117	3.65226	4.25943e-18
793	SLC25A46	ENSG00000164209	1.31097	0.0166554	1.24781	0.00302347
794	F2RL2	ENSG00000164220	1.51822	0.000798162	0.56306	0.0425746
795	CMBL	ENSG00000164237	1.33608	6.95117e-05	1.31209	1.08491e-06
796	AGGF1	ENSG00000164252	1.18725	0.0301073	0.818098	0.0130151
797	WDR41	ENSG00000164253	0.771815	0.00869339	0.476516	0.0179115
798	GPX8	ENSG00000164294	0.74066	0.00141194	0.557551	0.0174262
799	ERAP1	ENSG00000164307	2.1662	0.00292121	1.099	0.000147166
800	ERAP2	ENSG00000164308	2.16679	0.0282608	1.31066	2.86195e-12
801	TENT2	ENSG00000164329	1.73488	0.0198599	1.53566	0.000265322
802	ANKRA2	ENSG00000164331	1.59193	0.00105782	1.10403	0.0017235
803	UBLCP1	ENSG00000164332	1.10905	0.0104562	1.02471	0.0108207
804	TLR3	ENSG00000164342	11.4014	0.0036703	5.79045	2.35245e-46
805	FOXQ1	ENSG00000164379	2.674	0.000577016	3.19981	6.79848e-40
806	TRA2A	ENSG00000164548	0.884968	0.0194428	0.611374	0.00129738
807	SAP30L	ENSG00000164576	0.99878	0.0442228	0.598007	0.00108188
808	CAMLG	ENSG00000164615	0.766517	0.0106234	0.472607	0.00655741
809	C8orf48	ENSG00000164743	1.32098	0.0161619	1.1805	8.24119e-07
810	RAD21	ENSG00000164754	1.14926	0.0110514	1.2049	0.00979697
811	TNFRSF11B	ENSG00000164761	2.18875	1.18414e-13	1.87107	7.80613e-05
812	OSGIN2	ENSG00000164823	2.58885	0.0101695	1.02946	0.000131366
813	OXR1	ENSG00000164830	1.59267	0.0449354	1.07361	1.29413e-05
814	OSR2	ENSG00000164920	0.998291	0.000201916	0.584102	4.01343e-05
815	GEM	ENSG00000164949	2.52173	0.000140491	1.21994	0.000259519
816	PDP1	ENSG00000164951	1.46649	0.038904	1.26459	0.0149649
817	PSIP1	ENSG00000164985	1.06861	0.0429213	0.678269	0.0204837
818	DIRAS2	ENSG00000165023	6.26825	0.0112705	2.87663	4.29463e-11
819	NFIL3	ENSG00000165030	1.35339	0.000282811	1.36174	1.2315e-08
820	MAMDC2	ENSG00000165072	2.51894	3.9044e-05	2.63221	3.75574e-12
821	QNG1	ENSG00000165118	1.38756	0.00940727	0.773531	0.00269155
822	PGAP4	ENSG00000165152	0.836192	0.0070036	0.579805	0.000152453
823	OTUD1	ENSG00000165312	1.82388	0.0213089	1.75923	6.66115e-06
824	FBXO33	ENSG00000165355	2.1917	0.0166107	0.589804	0.0233405
825	LRFN5	ENSG00000165379	3.29061	0.00507427	1.05703	2.96902e-05
826	REEP3	ENSG00000165476	0.863872	0.0312363	0.785714	0.0397047
827	DEPP1	ENSG00000165507	7.10781	8.04075e-05	2.97697	3.76108e-10
828	AKR1E2	ENSG00000165568	1.77272	0.0340281	0.64135	0.0127583
829	VSTM4	ENSG00000165633	4.45514	0.0209639	1.6708	2.02686e-26
830	ZNF503	ENSG00000165655	3.31945	6.28206e-07	2.65945	9.77489e-30
831	PIP4P1	ENSG00000165782	0.864541	0.00848182	0.475634	0.00182001
832	TRUB1	ENSG00000165832	3.26614	0.00139461	1.60098	0.0019074
833	E2F7	ENSG00000165891	12.1288	4.61569e-07	2.27213	3.69468e-09
834	CPSF2	ENSG00000165934	1.22511	0.0188016	0.551415	0.0152975
835	IFI27	ENSG00000165949	6.28639	1.56157e-08	5.50999	8.07815e-39
836	CEP295	ENSG00000166004	2.65657	0.0486187	0.833511	0.00187299
837	LIPC	ENSG00000166035	10.3287	0.00147981	3.0231	3.94915e-24
838	CKB	ENSG00000166165	2.34276	2.84942e-17	1.48933	7.96973e-05
839	BAG5	ENSG00000166170	1.37363	0.0495179	0.391942	0.0172255
840	CLMP	ENSG00000166250	0.985989	0.0131127	0.961807	0.00245595
841	BORCS7	ENSG00000166275	0.932901	0.0134102	0.888147	0.00735825
842	PLEKHF1	ENSG00000166289	1.63892	0.0199305	0.771653	0.038881
843	TPP1	ENSG00000166340	1.37052	0.00354323	0.864493	3.0307e-14
844	NETO1	ENSG00000166342	9.73249	1.69182e-05	5.12996	2.15849e-40
845	TMEM130	ENSG00000166448	6.08951	8.32445e-08	2.29425	7.2945e-31
846	WEE1	ENSG00000166483	0.969295	0.0312031	0.697435	0.0260548
847	SEC11C	ENSG00000166562	1.11635	0.0050152	0.92999	1.65649e-05
848	TMEM135	ENSG00000166575	2.49086	0.034205	1.11679	0.00445057
849	MMP10	ENSG00000166670	3.13292	0.00609479	1.95273	3.16787e-12
850	B2M	ENSG00000166710	1.61698	2.18838e-06	1.50601	6.92063e-14
851	GOLM2	ENSG00000166734	1.46225	0.00106458	1.38884	0.000310378
852	SLFN5	ENSG00000166750	1.13013	0.0186084	1.09581	0.000294731
853	MARF1	ENSG00000166783	2.67927	0.00487608	0.64909	0.0153566
854	AKTIP	ENSG00000166971	1.12773	0.0432936	0.542012	0.00657738
855	NUDT21	ENSG00000167005	0.732614	0.0285405	0.889988	0.0243152
856	PBX3	ENSG00000167081	1.32661	0.00227568	1.21577	6.91503e-13
857	EEIG1	ENSG00000167106	1.24317	0.0466455	0.474997	0.000277197
858	ZNF91	ENSG00000167232	3.70812	0.0345449	1.71158	5.09255e-13
859	ACAA2	ENSG00000167315	0.720376	0.0166554	0.411263	0.000304872
860	CYB5D2	ENSG00000167740	0.950472	3.54168e-05	0.551085	0.00187211
861	MIS12	ENSG00000167842	1.19033	0.0313674	0.559293	0.0317734
862	MGAT5B	ENSG00000167889	10.5733	8.46714e-05	1.97382	3.98636e-27
863	TMEM68	ENSG00000167904	1.55112	0.00439	1.42672	1.82215e-07
864	VWCE	ENSG00000167992	1.6808	5.92912e-06	1.20045	0.000502845
865	TRANK1	ENSG00000168016	9.66033	0.00955462	1.35885	8.57001e-14
866	BATF2	ENSG00000168062	6.97262	4.23613e-05	3.66121	1.79626e-49
867	DDIT4	ENSG00000168209	1.22748	0.0110514	0.992492	4.72419e-05
868	ZCCHC4	ENSG00000168228	2.5099	0.00582486	0.904578	0.000188531
869	IRF2BP2	ENSG00000168264	0.854291	0.00238033	0.73224	0.000731166
870	PCMTD1	ENSG00000168300	2.79935	0.00538285	1.45797	0.000119119
871	MLKL	ENSG00000168404	2.13536	0.00325949	1.24354	1.41945e-19
872	RAB31	ENSG00000168461	2.0951	7.38337e-06	1.26555	2.2854e-23
873	CAVIN2	ENSG00000168497	2.13924	1.25764e-05	2.14884	9.26221e-12
874	LRATD2	ENSG00000168672	5.46523	4.27022e-07	3.78669	1.33846e-38
875	SLC16A4	ENSG00000168679	1.46363	0.000871965	1.2504	0.000117447
876	TCTN2	ENSG00000168778	1.69195	0.00326	0.967361	3.11239e-14
877	ABHD15	ENSG00000168792	1.16007	0.000644805	0.691466	2.93433e-07
878	ATOH8	ENSG00000168874	2.78868	0.0135475	1.55361	2.98268e-05
879	MAT2A	ENSG00000168906	0.57906	0.0255281	0.367234	0.0232395
880	LGALS9	ENSG00000168961	13.381	6.27723e-06	4.84024	3.06476e-33
881	ROR2	ENSG00000169071	10.0665	0.00141756	1.01547	1.37825e-09
882	CPT1C	ENSG00000169169	1.90789	0.00180063	1.3317	5.04484e-06
883	THBS3	ENSG00000169231	1.47442	9.11579e-06	0.662839	0.00319163
884	CXCL11	ENSG00000169248	6.6208	1.51377e-05	4.02468	2.25967e-29
885	B3GALNT1	ENSG00000169255	1.88727	0.00180063	2.05724	7.74963e-11
886	SDC2	ENSG00000169439	1.23774	3.09034e-07	1.05712	1.32039e-05
887	SLC38A11	ENSG00000169507	4.96141	0.00483372	2.86483	1.25887e-24
888	ZEB2	ENSG00000169554	3.17907	0.0184927	1.30608	0.00409905
889	PCDH7	ENSG00000169851	3.20748	8.73382e-06	2.75526	4.86337e-20
890	TRIM56	ENSG00000169871	1.66148	0.00863414	0.616342	0.00117751
891	TM4SF1	ENSG00000169908	1.60181	0.0208762	1.47939	3.77426e-14
892	GUSB	ENSG00000169919	0.997429	0.00106035	0.492681	0.0494477
893	HOXD4	ENSG00000170166	3.76368	7.28723e-06	1.85801	1.79585e-19
894	PWWP2A	ENSG00000170234	1.71014	0.0108613	0.879124	0.000494088
895	FAXDC2	ENSG00000170271	3.55011	4.8291e-07	1.7673	1.72261e-21
896	HSPB2	ENSG00000170276	2.47815	0.000218973	1.44715	2.06977e-05
897	FABP4	ENSG00000170323	3.30657	6.53394e-18	3.47625	9.26736e-33
898	TMED10	ENSG00000170348	1.02682	1.90778e-05	0.891636	5.685e-05
899	EMX2	ENSG00000170370	1.17291	0.020951	0.692723	8.34587e-06
900	SLC30A1	ENSG00000170385	1.83343	0.00037579	1.804	6.39746e-08
901	ARL6IP1	ENSG00000170540	1.11007	0.016	0.869442	0.00137996
902	CDH2	ENSG00000170558	3.5881	2.28452e-05	2.17088	1.23897e-15
903	EMB	ENSG00000170571	12.2861	9.13997e-07	8.75111	2.4822e-29
904	STAT2	ENSG00000170581	2.16968	0.00266478	1.5556	3.29229e-27
905	KCNS3	ENSG00000170745	5.48928	0.00168809	2.29332	4.14003e-40
906	GPR37	ENSG00000170775	6.00781	7.51839e-07	6.61345	1.23577e-33
907	PPM1D	ENSG00000170836	2.38047	0.0122903	1.31583	2.64869e-08
908	CYTL1	ENSG00000170891	3.29283	8.10413e-08	2.06341	5.83758e-16
909	MSANTD4	ENSG00000170903	0.999879	0.0137754	0.984809	0.00368083
910	ZNF160	ENSG00000170949	2.19433	0.0016935	0.703662	0.00903824
911	ZNF415	ENSG00000170954	1.11361	0.0354295	0.662971	0.0230347
912	ATP6V0E2	ENSG00000171130	1.39536	1.18187e-05	0.815655	0.0015663
913	SOCS5	ENSG00000171150	1.93649	0.000730167	1.22135	0.000970229
914	FAM241B	ENSG00000171224	9.74968	0.0132204	2.24678	6.6826e-08
915	NPTX1	ENSG00000171246	2.44534	1.50609e-05	2.60437	4.54154e-25
916	GAA	ENSG00000171298	1.44859	2.18698e-08	0.842378	0.00427106
917	CHST11	ENSG00000171310	2.58757	0.0416891	2.11499	2.17845e-13
918	ZNF562	ENSG00000171466	2.40819	0.0429057	1.0012	0.00704243
919	LRRC8D	ENSG00000171492	4.05194	0.00599517	0.850298	0.00592244
920	MAP6	ENSG00000171533	5.92322	1.19948e-05	3.26466	3.00612e-77
921	ENC1	ENSG00000171617	1.01609	6.32151e-06	0.52055	0.0113199
922	TMEM51	ENSG00000171729	1.71997	0.00533979	0.978133	4.77429e-09
923	WDR87	ENSG00000171804	8.96687	0.0255363	5.31983	0.00310592
924	COL8A2	ENSG00000171812	1.72012	0.000906096	0.444572	0.000179135
925	PTEN	ENSG00000171862	1.34374	0.000874256	1.10391	1.11447e-06
926	RNASEH1	ENSG00000171865	0.670088	0.0381111	0.430334	0.0105471
927	TVP23B	ENSG00000171928	0.973594	0.0188076	1.15445	0.0154532
928	EPHX4	ENSG00000172031	2.08467	0.0476253	1.36904	2.88787e-07
929	KLF11	ENSG00000172059	4.17825	0.023101	2.04466	9.07518e-10
930	KRCC1	ENSG00000172086	0.734302	0.021373	0.514914	0.043445
931	PAIP1	ENSG00000172239	0.97699	0.0263037	0.562525	0.0369913
932	CERS6	ENSG00000172292	2.06225	0.000788435	1.42079	6.91857e-05
933	CSDC2	ENSG00000172346	2.93406	0.00389185	2.06211	5.69997e-14
934	IL17D	ENSG00000172458	1.93908	0.00985938	1.14104	1.41903e-06
935	WASHC2C	ENSG00000172661	2.84603	0.00023734	0.550669	0.000636145
936	ZMAT3	ENSG00000172667	0.743957	0.025339	0.508569	0.0485697
937	SLFN11	ENSG00000172716	2.77498	0.0125704	1.36346	6.31467e-06
938	CES3	ENSG00000172828	10.1204	0.014161	3.45295	4.34072e-13
939	CES2	ENSG00000172831	0.904252	3.99638e-05	0.583712	5.63337e-08
940	SP3	ENSG00000172845	1.69908	0.0442882	1.54761	0.00101867
941	MRGPRF	ENSG00000172935	0.699071	1.1363e-05	0.420452	0.0416308
942	HECTD4	ENSG00000173064	3.5932	0.00679562	0.634278	0.0141817
943	HPSE	ENSG00000173083	10.2047	0.017413	3.14418	1.95467e-31
944	PARP14	ENSG00000173193	13.5308	1.05379e-09	1.87786	4.92069e-57
945	OLR1	ENSG00000173391	10.6757	0.00413721	0.911888	0.00177014
946	PEAK1	ENSG00000173517	2.29166	0.0337492	1.10543	0.00027671
947	TNFRSF10C	ENSG00000173535	2.50486	1.50191e-07	0.95532	0.000167563
948	HSPB7	ENSG00000173641	2.60357	1.45968e-12	1.96935	1.59243e-20
949	CIMAP3	ENSG00000173947	10.5364	0.000488098	3.41166	1.05302e-26
950	SLC25A30	ENSG00000174032	2.76997	0.0492393	1.30153	5.82679e-07
951	FAM174A	ENSG00000174132	0.708995	0.0145517	0.380921	0.0199247
952	BBS1	ENSG00000174483	0.995792	0.00422533	0.68805	1.18723e-06
953	IL20RB	ENSG00000174564	1.44327	3.06288e-06	0.50083	0.00445598
954	TRAM1L1	ENSG00000174599	1.87968	0.0071348	2.0556	1.3218e-09
955	B4GAT1	ENSG00000174684	0.94859	1.64828e-05	0.549259	0.00214882
956	NR1D2	ENSG00000174738	11.1654	3.02334e-05	1.71743	1.4101e-05
957	THAP6	ENSG00000174796	3.53312	0.0198091	0.744921	0.000309773
958	TMEM9B	ENSG00000175348	0.778733	0.000906274	0.449413	0.00428291
959	SCUBE2	ENSG00000175356	2.37346	0.00772886	0.956174	4.49297e-09
960	LPL	ENSG00000175445	12.047	0.000387661	7.66403	3.0327e-30
961	SUGCT	ENSG00000175600	1.67306	1.63727e-07	1.46105	5.29566e-19
962	TMEM70	ENSG00000175606	0.850899	0.0111163	0.804552	0.000542038
963	SLC35E3	ENSG00000175782	1.40603	0.0320374	0.569828	0.00680703
964	ARL4D	ENSG00000175906	1.11754	0.000453076	0.89334	1.74931e-05
965	DLEU1	ENSG00000176124	0.829772	0.0257163	0.489684	0.0194674
966	TCP11L1	ENSG00000176148	1.20668	0.00562495	0.704315	0.000265008
967	ZNF404	ENSG00000176222	2.2855	0.047301	1.06327	0.0395002
968	SLCO3A1	ENSG00000176463	2.69548	2.35941e-09	1.91102	4.13408e-60
969	PLAAT3	ENSG00000176485	2.8936	0.00290783	1.90869	2.96473e-06
970	PRR15	ENSG00000176532	5.35863	0.0192951	1.2145	0.0330977
971	BDNF	ENSG00000176697	1.62752	1.80527e-08	1.47422	5.30677e-17
972	NCKAP5	ENSG00000176771	6.06736	0.0391414	1.76903	2.28051e-06
973	IRX5	ENSG00000176842	1.73445	3.62574e-05	1.15951	2.74898e-11
974	GCNT4	ENSG00000176928	3.30105	0.0027423	1.29056	1.04029e-05
975	ZDHHC13	ENSG00000177054	2.94988	0.0354782	1.0983	1.5811e-06
976	FZD8	ENSG00000177283	2.68525	3.62574e-05	1.6359	6.85492e-15
977	LRRN4CL	ENSG00000177363	1.19417	1.05824e-06	1.0568	1.89544e-15
978	SAMD9L	ENSG00000177409	4.91464	0.000585146	3.12406	1.29395e-22
979	PAWR	ENSG00000177425	1.62893	0.00219639	1.09121	0.000325746
980	TGIF1	ENSG00000177426	0.753261	0.0236725	0.664144	5.77325e-05
981	THAP5	ENSG00000177683	3.80598	0.0158397	1.52789	0.00106346
982	CCDC184	ENSG00000177875	3.72466	2.87868e-08	4.30977	9.86241e-49
983	C2orf69	ENSG00000178074	1.70267	0.0386583	1.29287	0.00854097
984	DDX10	ENSG00000178105	2.17859	0.000864608	1.36378	1.31346e-46
985	PARD6G	ENSG00000178184	3.78255	3.80964e-07	3.26183	3.1234e-53
986	POGLUT3	ENSG00000178202	2.16475	0.00138636	1.77542	2.49725e-08
987	SLITRK1	ENSG00000178235	5.51572	1.10465e-10	6.90479	2.55194e-51
988	SHISA3	ENSG00000178343	10.489	0.00110283	6.47031	1.29386e-09
989	PARP10	ENSG00000178685	2.2003	0.00295061	1.47431	0.000139081
990	KCTD12	ENSG00000178695	2.29614	4.7486e-05	2.75149	7.77442e-14
991	THBD	ENSG00000178726	4.19902	1.67006e-05	4.97455	6.05099e-37
992	MSC	ENSG00000178860	3.0245	9.59282e-20	2.46304	5.18223e-32
993	SNX18	ENSG00000178996	4.91321	3.15146e-10	1.26254	0.00311092
994	SNX18	ENSG00000178996	1.17808	0.0112569	1.26254	0.00311092
995	TMEM107	ENSG00000179029	0.963538	0.0135908	0.47493	0.0144142
996	FUCA1	ENSG00000179163	1.81536	0.00345534	1.51083	1.77005e-14
997	ELMOD2	ENSG00000179387	1.41231	0.0101974	1.0645	3.34431e-06
998	PLD6	ENSG00000179598	2.85297	0.00265784	0.793479	3.0753e-08
999	SERTAD2	ENSG00000179833	1.73837	0.0226087	0.652196	0.00234479
1000	C3orf80	ENSG00000180044	5.64949	5.93361e-07	6.69013	7.59935e-18
1001	LYNX1	ENSG00000180155	0.699373	0.00708065	0.531315	7.98143e-05
1002	MTURN	ENSG00000180354	0.835293	0.0388777	0.483836	0.000889042
1003	MCFD2	ENSG00000180398	1.10487	0.00528276	1.09268	0.000724028
1004	C11orf71	ENSG00000180425	1.72764	0.0406797	1.37938	0.000114217
1005	GAS1	ENSG00000180447	1.75079	2.62015e-07	1.24125	0.000542869
1006	TSPYL5	ENSG00000180543	0.888355	0.0321004	0.767814	0.00199757
1007	H2AC6	ENSG00000180573	0.922455	0.00288852	0.604071	0.0197025
1008	H2BC4	ENSG00000180596	1.67177	0.000776142	0.756172	0.00303159
1009	PCGF5	ENSG00000180628	1.8489	0.0209639	1.22008	1.1649e-07
1010	TMEM64	ENSG00000180694	1.56958	0.0317329	1.21248	0.00277419
1011	GREM2	ENSG00000180875	5.52065	2.29385e-06	4.57579	4.47078e-68
1012	CHRM2	ENSG00000181072	2.6489	0.000113658	2.30444	1.4612e-14
1013	H2AC25	ENSG00000181218	1.49653	0.0012941	0.847544	0.00032098
1014	DDX60L	ENSG00000181381	9.37017	1.34386e-06	3.63519	1.70427e-26
1015	SLC9A9	ENSG00000181804	9.34029	0.037883	0.926322	8.5219e-09
1016	ZNF329	ENSG00000181894	2.59097	0.0406404	0.398032	0.0113347
1017	ADO	ENSG00000181915	1.02782	0.00108102	0.98234	4.46342e-05
1018	CCDC149	ENSG00000181982	1.49115	0.0444743	0.42059	1.23429e-05
1019	PNMA8A	ENSG00000182013	2.78777	0.00115929	1.62456	2.30771e-07
1020	CHST15	ENSG00000182022	1.66382	0.0453335	0.909943	4.14125e-05
1021	FAM89A	ENSG00000182118	3.04329	1.64709e-10	2.68852	8.9465e-50
1022	TDRKH	ENSG00000182134	4.15682	0.0423253	0.512957	0.0379934
1023	C1S	ENSG00000182326	2.90688	2.50146e-15	2.39163	8.54733e-67
1024	TSPAN10	ENSG00000182612	1.85046	0.0381111	0.979772	0.000551487
1025	PAPPA	ENSG00000182752	2.62722	0.00742158	2.22011	2.33323e-10
1026	C11orf54	ENSG00000182919	2.00922	0.0232277	0.928108	0.0056799
1027	SLC8A1	ENSG00000183023	10.1913	0.000185977	2.02327	6.68838e-12
1028	GPC6	ENSG00000183098	11.1728	1.19371e-07	6.9418	3.10728e-109
1029	SELENOF	ENSG00000183291	0.750925	0.00739609	0.631304	0.0235302
1030	JRKL	ENSG00000183340	1.10658	0.0118199	1.13549	0.00585635
1031	MX2	ENSG00000183486	13.5893	0.0144913	7.49681	1.48335e-118
1032	MEX3B	ENSG00000183496	2.35078	0.0353431	1.48583	0.00312811
1033	FAM167B	ENSG00000183615	1.67248	0.0418799	1.68693	0.0024531
1034	TRIM52	ENSG00000183718	1.6303	0.0406414	1.07182	2.4071e-05
1035	LHFPL6	ENSG00000183722	1.2929	7.75919e-11	0.987954	4.1579e-05
1036	TMEM50A	ENSG00000183726	0.718182	0.000492497	0.514496	0.00040036
1037	TBK1	ENSG00000183735	3.24206	0.0136379	0.77992	0.000565632
1038	OLFML1	ENSG00000183801	2.73333	2.98898e-07	1.66815	7.86667e-21
1039	UTY	ENSG00000183878	4.38336	0.0268484	0.578612	0.0370805
1040	PCDH9	ENSG00000184226	2.53181	0.0336752	1.0863	0.0258584
1041	EFNA5	ENSG00000184349	2.76908	0.00123363	1.05303	3.86442e-05
1042	CSF1	ENSG00000184371	1.1823	1.63416e-06	0.669951	3.66703e-07
1043	COLEC10	ENSG00000184374	6.78296	1.8699e-11	4.91183	1.53104e-121
1044	CEND1	ENSG00000184524	2.47396	7.46116e-08	2.00219	1.29951e-08
1045	SOCS3	ENSG00000184557	2.28008	0.000560187	1.29534	1.26065e-10
1046	PDE4B	ENSG00000184588	10.1742	0.0361732	2.92983	2.41902e-16
1047	H2BC21	ENSG00000184678	1.17579	8.98026e-05	0.729533	1.71729e-06
1048	ATL3	ENSG00000184743	1.13809	0.0141784	0.801542	5.67252e-05
1049	RBM43	ENSG00000184898	4.51635	2.99686e-05	1.98254	1.26319e-06
1050	USP18	ENSG00000184979	7.30111	0.00113864	4.56687	7.94732e-122
1051	AP3M1	ENSG00000185009	0.862324	0.0478014	0.784291	0.000763421
1052	F8	ENSG00000185010	3.36987	0.0318495	1.89318	1.04174e-11
1053	FLRT2	ENSG00000185070	1.40099	0.0404802	1.08284	2.6883e-09
1054	MANEAL	ENSG00000185090	5.47476	2.62377e-05	1.88523	4.13897e-19
1055	ADSS1	ENSG00000185100	2.81673	0.040971	1.31821	5.09038e-09
1056	FAM43A	ENSG00000185112	1.30523	1.73046e-10	0.848516	3.49749e-13
1057	PURA	ENSG00000185129	1.37514	0.0131039	0.9349	0.0126223
1058	LRRC37B	ENSG00000185158	9.84676	0.00211932	1.41989	4.63327e-10
1059	TNFAIP2	ENSG00000185215	2.44318	0.0145265	0.308818	0.0173093
1060	IRF7	ENSG00000185507	4.47515	0.00172001	2.51489	6.27798e-14
1061	PBX1	ENSG00000185630	1.97079	0.0405381	1.43178	3.41906e-10
1062	ZFP36L1	ENSG00000185650	1.12375	0.000295197	0.946089	0.00103728
1063	YTHDF3	ENSG00000185728	1.11771	0.0251081	1.17851	0.00140872
1064	IFIT1	ENSG00000185745	5.81519	1.06073e-11	5.44909	9.66687e-134
1065	IFITM1	ENSG00000185885	5.29549	0.00304002	4.65988	3.00124e-42
1066	RTN4RL1	ENSG00000185924	11.6533	2.47842e-05	3.95838	8.71818e-37
1067	IRS2	ENSG00000185950	1.14227	0.00564831	0.958128	0.00111685
1068	AIDA	ENSG00000186063	0.966843	0.01625	0.663904	0.00139566
1069	GPAT2	ENSG00000186281	1.81214	2.64494e-07	1.32593	7.25531e-16
1070	NAP1L3	ENSG00000186310	3.03068	0.00553608	4.06894	6.87685e-18
1071	RXRA	ENSG00000186350	1.35013	0.0403885	0.60644	6.62563e-05
1072	CCDC30	ENSG00000186409	0.787134	0.000403748	1.84328	2.45983e-10
1073	GNG2	ENSG00000186469	1.61099	0.00575283	1.03081	0.000114217
1074	SMYD4	ENSG00000186532	2.98764	0.0432936	0.439309	0.0127989
1075	UBE2H	ENSG00000186591	0.900482	0.00218363	0.328187	0.00703467
1076	PDE2A	ENSG00000186642	4.78448	1.28561e-06	2.56451	4.41247e-07
1077	ZNF397	ENSG00000186812	3.43314	0.0373596	0.737229	8.4249e-06
1078	TPCN1	ENSG00000186815	1.26673	0.00722519	0.384656	0.0485933
1079	HEXIM1	ENSG00000186834	0.706924	0.00246592	0.311787	0.0349358
1080	AKR1C1	ENSG00000187134	1.75994	0.0398711	1.07582	1.03288e-05
1081	ISG15	ENSG00000187608	3.41028	2.03587e-06	3.08475	1.95192e-09
1082	TCEA1	ENSG00000187735	1.03238	0.0284362	0.832017	0.00373486
1083	TMEM220	ENSG00000187824	0.926523	0.0222878	0.561758	0.0337921
1084	PABIR1	ENSG00000187866	1.10681	0.0189814	0.962775	1.25658e-06
1085	COL14A1	ENSG00000187955	3.55766	0.0108935	1.29102	5.82031e-07
1086	ARL4C	ENSG00000188042	1.32915	0.00287215	0.708202	1.00109e-05
1087	NCR3LG1	ENSG00000188211	10.5034	0.00335479	1.87297	0.00425529
1088	PLSCR1	ENSG00000188313	2.20259	0.00597713	1.89057	1.57777e-11
1089	CIBAR1	ENSG00000188343	1.62491	0.0399895	0.927491	9.5439e-05
1090	INSC	ENSG00000188487	4.79816	1.552e-06	3.92579	8.21272e-77
1091	CCDC9B	ENSG00000188549	3.24231	5.57909e-05	1.55586	5.84204e-40
1092	PRELP	ENSG00000188783	2.79704	9.92236e-11	2.56882	7.81132e-34
1093	NHLRC3	ENSG00000188811	1.71381	0.000887193	1.36765	1.59948e-08
1094	MSL1	ENSG00000188895	0.790544	0.00020617	0.499367	0.0165944
1095	FAM47E	ENSG00000189157	1.30635	4.93557e-05	4.10537	5.506e-07
1096	PCDH18	ENSG00000189184	1.6262	2.92667e-06	1.38541	0.000109513
1097	SLC35E2B	ENSG00000189339	0.616786	0.0181259	0.344707	0.0495672
1098	BLOC1S2	ENSG00000196072	0.739119	0.0102513	0.649604	0.00442078
1099	TDRD7	ENSG00000196116	2.84748	0.0481756	1.30154	3.77513e-16
1100	RFX8	ENSG00000196460	11.5111	3.47825e-05	1.42415	1.06987e-12
1101	SULF2	ENSG00000196562	3.15818	7.67051e-05	2.04492	4.16625e-35
1102	MMP1	ENSG00000196611	2.06545	0.0135145	2.69643	2.63347e-64
1103	AMZ2	ENSG00000196704	1.29907	0.0266206	0.281062	0.00420706
1104	ANXA4	ENSG00000196975	0.820405	0.0239359	0.720997	0.000623001
1105	ZSCAN25	ENSG00000197037	2.88279	0.0230802	0.64463	0.0154888
1106	GAL3ST4	ENSG00000197093	1.71876	1.94039e-07	1.48361	3.88071e-10
1107	SLC6A17	ENSG00000197106	11.3107	0.00555487	3.23228	1.59848e-43
1108	NOL4L	ENSG00000197183	1.47575	0.0120833	0.681106	0.00256992
1109	SVIL	ENSG00000197321	2.52777	0.00120458	1.46189	2.59245e-07
1110	ZNF655	ENSG00000197343	1.10044	0.0046047	0.838801	0.00580122
1111	DACT3	ENSG00000197380	2.27827	0.0126658	0.551671	0.00482386
1112	ZNF841	ENSG00000197608	1.45283	0.0142317	0.952168	0.000130475
1113	SERPINB2	ENSG00000197632	2.64154	0.00274687	3.49296	7.87522e-20
1114	CCDC180	ENSG00000197816	2.16722	0.0178035	0.797389	0.0135989
1115	ZNF181	ENSG00000197841	1.44701	0.000912078	1.48594	2.13589e-05
1116	SOWAHC	ENSG00000198142	1.46355	0.012726	1.34957	0.00246053
1117	HSD17B11	ENSG00000198189	1.38404	0.000274176	1.03602	7.35353e-10
1118	SLC29A3	ENSG00000198246	10.0007	1.79322e-05	0.594193	0.00590009
1119	TMEM116	ENSG00000198270	2.41153	0.0094661	0.765088	8.63297e-05
1120	ZNF442	ENSG00000198342	5.09918	0.000292537	1.45615	4.67184e-07
1121	GFPT1	ENSG00000198380	1.07993	0.00104382	0.899613	0.00170842
1122	ATL1	ENSG00000198513	1.49766	1.69343e-05	1.19236	7.16138e-09
1123	ITGBL1	ENSG00000198542	2.27612	0.000387661	2.25971	9.31629e-27
1124	TLK1	ENSG00000198586	2.1188	0.0252822	1.38055	0.000864685
1125	COPS8	ENSG00000198612	0.873989	0.000314542	0.552185	0.000227956
1126	TUSC1	ENSG00000198680	1.22107	0.000232081	1.04702	6.27206e-09
1127	LDB1	ENSG00000198728	0.84366	0.000375066	0.439088	0.012373
1128	ZNF521	ENSG00000198795	5.2945	0.0387322	1.67381	8.56682e-07
1129	FICD	ENSG00000198855	2.46635	0.0344082	0.622575	1.5316e-06
1130	TSEN15	ENSG00000198860	0.900074	0.000219747	0.725881	0.000591444
1131	SMC5	ENSG00000198887	9.95819	0.0207641	0.889495	0.0150527
1132	KPRP	ENSG00000203786	7.80893	1.81051e-12	7.75531	1.57086e-94
1133	H2BC18	ENSG00000203814	3.69953	0.000116939	1.88417	0.0249397
1134	GGTA1	ENSG00000204136	9.4027	0.000151038	3.14724	1.41918e-16
1135	BMPR2	ENSG00000204217	3.72548	0.000906274	1.13722	0.000576253
1136	TCEA3	ENSG00000204219	2.013	1.50191e-07	1.40236	6.57566e-09
1137	COL15A1	ENSG00000204291	15.6326	1.8221e-22	5.25969	7.48505e-82
1138	PJVK	ENSG00000204311	3.61978	0.0140693	1.31368	5.80839e-08
1139	SDHD	ENSG00000204370	0.758746	0.0311617	0.768041	0.0319172
1140	NALF1	ENSG00000204442	3.43721	9.15527e-07	3.15926	8.54305e-47
1141	PNMA8B	ENSG00000204851	1.89912	0.0490706	1.09508	0.000166461
1142	TCTN1	ENSG00000204852	1.28266	5.075e-06	0.618133	6.93761e-07
1143	KRT40	ENSG00000204889	9.39572	0.0187463	5.39915	6.95461e-29
1144	TRIQK	ENSG00000205133	1.37204	0.00893757	1.25272	7.63208e-05
1145	SNX2	ENSG00000205302	0.833297	0.0443236	0.55555	0.00171794
1146	SAMD9	ENSG00000205413	5.98511	0.00031938	3.8772	6.94124e-26
1147	ATP10A	ENSG00000206190	5.4639	0.000447836	2.0415	1.36297e-31
1148	STK38L	ENSG00000211455	6.06169	0.0266206	1.01123	0.00241386
1149	MLLT11	ENSG00000213190	1.3959	6.20702e-07	1.16346	1.47456e-13
1150	CHUK	ENSG00000213341	1.86372	0.0425671	0.832825	0.00606593
1151	LBH	ENSG00000213626	1.67431	3.65924e-10	1.58077	5.08887e-24
1152	ZNF888	ENSG00000213793	1.60507	0.0411226	0.466955	0.048429
1153	TM6SF2	ENSG00000213996	2.37238	0.00144355	0.808964	0.0142989
1154	GANC	ENSG00000214013	3.35425	0.031833	0.822	9.64285e-07
1155	HAUS3	ENSG00000214367	1.81601	0.0441162	0.821711	0.0291667
1156	TMEM167B	ENSG00000215717	0.767406	0.00787271	0.71849	0.00108182
1157	IFI30	ENSG00000216490	1.91903	0.00275209	1.29099	2.226e-05
1158	TAFA5	ENSG00000219438	10.2878	0.00939331	5.06967	1.19544e-09
1159	UMAD1	ENSG00000219545	1.37821	0.0194084	1.29982	0.000231267
1160	CEBPD	ENSG00000221869	1.02446	5.4609e-07	0.603192	0.00160574
1161	APOL6	ENSG00000221963	3.41083	0.0393886	2.01361	1.94133e-19
1162	ELFN1	ENSG00000225968	1.85944	2.05674e-05	1.27537	6.81453e-13
1163	RNF103	ENSG00000239305	0.646941	0.0119687	0.95298	0.000209419
1164	APOBEC3G	ENSG00000239713	2.50899	0.0232028	1.95158	1.6076e-27
1165	AMY2B	ENSG00000240038	2.17971	0.0304974	1.29468	8.54746e-07
1166	PPIL3	ENSG00000240344	1.01128	0.000427513	0.671501	0.000443272
1167	AMACR	ENSG00000242110	1.113	0.00113864	0.641773	3.28322e-07
1168	ARPIN	ENSG00000242498	0.688397	0.00564437	0.68275	0.00309468
1169	STON1	ENSG00000243244	1.78532	0.0343088	1.0696	0.000581026
1170	TMEM35B	ENSG00000243749	1.14903	8.29792e-06	0.696135	0.00310349
1171	IFITM10	ENSG00000244242	5.61157	7.93119e-08	2.90054	2.98173e-13
1172	IFITM10	ENSG00000244242	3.18926	0.0025857	2.90054	2.98173e-13
1173	N4BP2L2	ENSG00000244754	1.27322	0.00937036	0.774678	1.27207e-06
1174	SELENOP	ENSG00000250722	3.52132	1.54774e-05	2.57784	1.14581e-15
1175	ZNF550	ENSG00000251369	3.44968	0.0255363	0.927038	0.014002
1176	CCDC71L	ENSG00000253276	0.781975	0.00563366	0.416642	0.00265306
1177	CTSO	ENSG00000256043	2.09002	0.032663	0.978059	6.00836e-05
1178	ZNF486	ENSG00000256229	3.05137	0.00616492	1.42319	4.47512e-05
1179	ARHGAP5-AS1	ENSG00000258655	1.59585	0.0139609	1.07416	0.000122336
1180	TRIM34	ENSG00000258659	5.57746	0.00311693	2.14076	6.12085e-21
1181	RNASE4	ENSG00000258818	1.43036	4.54989e-07	1.65874	4.95652e-13
1182	CEP95	ENSG00000258890	4.8902	0.000355976	0.941984	4.96513e-11
1183	INAFM2	ENSG00000259330	0.971033	0.00250176	0.621479	4.53995e-06
1184	CCPG1	ENSG00000260916	2.76894	1.56954e-12	2.50626	2.70538e-07
1185	PIERCE2	ENSG00000261652	2.96309	0.000864953	1.41642	0.00173079
1186	TXNIP	ENSG00000265972	3.0551	1.61704e-22	3.02477	2.32314e-101
1187	NBPF12	ENSG00000268043	2.72643	0.0271912	0.906927	0.00145369
1188	H4C14	ENSG00000270882	2.60902	0.000685013	1.78381	5.56261e-06
1189	SRXN1	ENSG00000271303	0.645186	0.000445218	0.455171	0.000702236
1190	CCL5	ENSG00000271503	7.69036	3.47293e-08	6.23416	1.0317e-36
1191	MAFIP	ENSG00000274847	2.79683	0.0442719	2.12765	1.26459e-07
1192	H4C9	ENSG00000276180	2.60902	0.000685013	2.06159	0.0118964
1193	RAB7B	ENSG00000276600	1.37083	0.000351384	0.476831	0.00336448
1194	ZNF229	ENSG00000278318	10.0549	0.0489189	0.699213	0.0367339

## Sheet: YvsO(O↓)
	Supplementary Table S5F.
	Common DEGs identified by both workflows (padj < 0.05).
			Portable Pipeline		Command-line
	Gene name	Ensembl ID	log2FC	padj	log2FC	padj
1	FUCA2	ENSG00000001036	-0.727763	0.000347974	-1.08519	1.61248e-27
2	ARF5	ENSG00000004059	-0.848635	0.00493703	-1.58057	2.32054e-06
3	POLDIP2	ENSG00000004142	-0.32333	0.0336769	-0.89207	1.19886e-07
4	RALA	ENSG00000006451	-0.490977	0.0366424	-0.75065	2.95015e-05
5	CCDC124	ENSG00000007080	-0.819267	0.00408818	-1.82975	1.18189e-05
6	TSR3	ENSG00000007520	-0.628437	0.0269046	-1.60748	7.39848e-05
7	PSMB1	ENSG00000008018	-1.25504	3.90876e-13	-1.84325	1.66507e-10
8	RPS20	ENSG00000008988	-0.756107	0.00193257	-1.3258	3.20022e-08
9	UQCRC1	ENSG00000010256	-1.36057	8.8879e-11	-2.20011	8.4858e-22
10	PRSS3	ENSG00000010438	-10.5496	1.4585e-05	-7.40603	3.91879e-11
11	LYPLA2	ENSG00000011009	-0.369276	0.0256551	-1.20375	0.000182205
12	TSPAN9	ENSG00000011105	-1.00605	0.000250399	-2.05476	1.77952e-32
13	CLDN11	ENSG00000013297	-1.38329	4.89079e-07	-1.64335	2.37304e-16
14	ACP3	ENSG00000014257	-3.20709	0.0128753	-4.82836	2.79543e-75
15	RNH1	ENSG00000023191	-0.436075	0.0135638	-0.927158	3.72325e-06
16	PLEKHO1	ENSG00000023902	-0.919878	0.00423228	-1.78572	2.81475e-08
17	TOMM34	ENSG00000025772	-0.916163	2.48934e-05	-1.58153	2.86158e-17
18	B4GALT7	ENSG00000027847	-0.630232	0.0120294	-1.43276	1.41597e-06
19	BAK1	ENSG00000030110	-1.09774	0.00211932	-1.92658	5.28005e-09
20	TMSB10	ENSG00000034510	-2.24613	0.00124659	-2.04869	2.20484e-06
21	CAPG	ENSG00000042493	-0.734541	0.00149139	-1.51643	8.34462e-06
22	NOP16	ENSG00000048162	-0.739109	0.000483812	-1.14054	3.27585e-12
23	CYBA	ENSG00000051523	-0.796648	0.0459664	-1.96437	4.74256e-05
24	AKR7A2	ENSG00000053371	-0.361026	0.0495203	-0.973705	2.08277e-05
25	SEC61A1	ENSG00000058262	-0.471402	0.0100157	-1.15708	2.60389e-21
26	ACAA1	ENSG00000060971	-0.964068	0.000430875	-1.79581	8.8483e-24
27	RPL18	ENSG00000063177	-0.992669	1.38015e-06	-1.69792	2.62291e-07
28	ISOC2	ENSG00000063241	-0.497041	0.0342479	-1.28521	0.00018501
29	U2AF2	ENSG00000063244	-0.433001	0.0386583	-0.904085	5.10139e-10
30	EPN1	ENSG00000063245	-0.522116	0.0394297	-1.18716	0.00113339
31	CNN2	ENSG00000064666	-1.06941	0.000194534	-1.77974	2.3144e-35
32	HMG20B	ENSG00000064961	-0.54274	0.0429213	-1.18855	1.46353e-05
33	WDR18	ENSG00000065268	-0.710211	0.0194084	-1.68186	7.36386e-07
34	KARS1	ENSG00000065427	-0.354716	0.0100351	-0.870554	8.1396e-10
35	NDUFB4	ENSG00000065518	-0.802953	0.00670481	-1.38706	2.15287e-12
36	GAL	ENSG00000069482	-5.06285	7.30232e-13	-5.33062	4.16393e-35
37	RNF126	ENSG00000070423	-0.549187	0.0148488	-1.07732	1.42473e-05
38	RPL31	ENSG00000071082	-0.740953	0.000835573	-1.30111	3.72926e-08
39	WDR1	ENSG00000071127	-0.820604	3.89521e-06	-1.41449	6.77696e-71
40	DAZAP1	ENSG00000071626	-0.478994	0.0242183	-1.11805	3.38884e-09
41	PDCD2	ENSG00000071994	-1.02037	2.44954e-06	-1.2305	5.17163e-23
42	MGLL	ENSG00000074416	-0.77355	0.00388862	-1.3627	5.68363e-37
43	ENO1	ENSG00000074800	-0.470774	1.57938e-07	-1.09233	9.02467e-12
44	FSCN1	ENSG00000075618	-0.933794	7.91546e-07	-1.64311	8.07323e-21
45	ACTB	ENSG00000075624	-0.941852	3.29373e-06	-1.50578	1.31372e-20
46	ACTB	ENSG00000075624	-1.60653	0.0235136	-1.50578	1.31372e-20
47	EXOSC7	ENSG00000075914	-0.692959	0.0429885	-1.56139	4.00552e-09
48	STXBP2	ENSG00000076944	-0.867679	0.0163035	-4.98222	1.38754e-11
49	SNRPA	ENSG00000077312	-0.523795	0.0218489	-1.27001	0.000224333
50	CAPZB	ENSG00000077549	-0.59951	1.49959e-09	-1.14598	6.68838e-12
51	SYNJ2	ENSG00000078269	-4.86722	0.0169004	-2.0379	4.29669e-20
52	MOXD1	ENSG00000079931	-0.980546	0.000331793	-1.49996	4.3087e-20
53	COL5A3	ENSG00000080573	-1.19636	0.0271762	-2.74993	3.3497e-85
54	RPS5	ENSG00000083845	-0.72586	0.001306	-1.42968	1.48865e-06
55	GSTP1	ENSG00000084207	-0.592853	0.0141168	-1.42534	3.72402e-05
56	EIF3I	ENSG00000084623	-0.468145	6.32419e-05	-0.980658	8.68759e-13
57	TRIP6	ENSG00000087077	-0.39548	0.00433828	-0.896598	0.000209217
58	FTL	ENSG00000087086	-0.742976	0.000437	-1.09904	4.34362e-06
59	AURKA	ENSG00000087586	-1.39552	0.000154993	-1.94668	8.03548e-46
60	CASS4	ENSG00000087589	-3.80703	0.0481756	-2.94631	2.50791e-15
61	RPL6	ENSG00000089009	-1.16336	1.9559e-05	-1.62468	4.78031e-13
62	RPLP0	ENSG00000089157	-0.537204	6.18172e-09	-1.16943	1.38727e-07
63	RPLP0	ENSG00000089157	-1.06183	0.0104562	-1.16943	1.38727e-07
64	PXN	ENSG00000089159	-0.463987	0.0233888	-0.961277	8.1133e-09
65	TBX5	ENSG00000089225	-4.94257	0.00121125	-2.71885	3.82162e-71
66	MLF2	ENSG00000089693	-0.381652	0.00787271	-1.04596	1.30635e-05
67	NDUFB2	ENSG00000090266	-0.539593	0.0120543	-1.11683	0.000666668
68	NUDC	ENSG00000090273	-0.671085	0.0123953	-1.49237	0.000339916
69	EZR	ENSG00000092820	-1.04237	0.0413079	-1.99764	6.85514e-17
70	MYL6	ENSG00000092841	-1.83242	0.0268484	-2.29643	1.43262e-08
71	ADA2	ENSG00000093072	-10.4459	0.00194976	-3.15771	2.95424e-40
72	MRPS18A	ENSG00000096080	-0.891022	0.00174222	-1.9033	3.18628e-10
73	HSP90AB1	ENSG00000096384	-0.765607	1.17473e-08	-1.30518	2.80372e-36
74	PSMD8	ENSG00000099341	-0.483191	0.00466772	-1.03932	1.95963e-07
75	ATP5F1D	ENSG00000099624	-0.922007	0.00416654	-1.80578	3.85898e-05
76	HNRNPM	ENSG00000099783	-0.294218	0.0449888	-0.728768	1.14676e-13
77	NDUFB7	ENSG00000099795	-4.58702	0.0312114	-1.80639	9.38427e-05
78	CDC34	ENSG00000099804	-0.493517	0.0340611	-1.10423	0.000148522
79	POLR2E	ENSG00000099817	-0.818153	2.92217e-05	-1.5164	2.38705e-07
80	GCAT	ENSG00000100116	-2.23048	2.80568e-07	-2.87633	9.36256e-19
81	RPL3	ENSG00000100316	-0.855773	0.0120893	-1.34033	2.38861e-10
82	AHSA1	ENSG00000100591	-0.533329	0.00184667	-1.07645	6.45175e-08
83	MYBL2	ENSG00000101057	-3.31144	0.0398711	-3.16083	7.34426e-35
84	ADISSP	ENSG00000101220	-0.736004	0.000610288	-1.38468	7.20753e-05
85	MYL9	ENSG00000101335	-1.32619	0.000788318	-2.69614	6.80133e-15
86	COTL1	ENSG00000103187	-1.12648	5.52555e-09	-1.78255	1.2197e-23
87	STUB1	ENSG00000103266	-0.813099	0.0142802	-1.84454	6.31379e-05
88	ELOB	ENSG00000103363	-3.06098	0.038591	-1.73118	4.28185e-05
89	FAH	ENSG00000103876	-0.698547	0.0302581	-0.699822	0.0118071
90	EEF1D	ENSG00000104529	-0.687887	0.0145265	-1.58622	0.000562936
91	PLEKHJ1	ENSG00000104886	-0.504361	0.0182703	-1.20757	0.000408409
92	OAZ1	ENSG00000104904	-0.543663	0.000573281	-1.18739	3.27576e-06
93	PTOV1	ENSG00000104960	-0.505776	0.0453392	-1.355	0.000185739
94	TLE5	ENSG00000104964	-0.555947	0.00433828	-1.17107	5.46917e-07
95	PDCD5	ENSG00000105185	-0.44722	0.00493703	-0.779106	1.08174e-05
96	RPS16	ENSG00000105193	-0.762217	0.000147425	-1.26688	4.19932e-06
97	TIMM50	ENSG00000105197	-0.546304	0.0413387	-1.08877	3.25619e-05
98	RPS19	ENSG00000105372	-0.866737	0.000973725	-1.66792	5.10752e-06
99	ETFB	ENSG00000105379	-0.996963	0.0116249	-2.06816	3.45499e-06
100	CDC37	ENSG00000105401	-0.501806	1.00285e-05	-1.12092	0.000130444
101	MEIS3	ENSG00000105419	-0.864742	0.00846601	-2.04042	1.49129e-10
102	PPP2R1A	ENSG00000105568	-0.430173	0.000752185	-1.04075	9.11267e-07
103	RPL18A	ENSG00000105640	-0.957869	1.4601e-06	-1.72889	2.72431e-08
104	COPE	ENSG00000105669	-0.638943	0.00048434	-1.35588	5.54284e-06
105	FKBP8	ENSG00000105701	-0.482752	0.00999954	-1.25703	0.000215955
106	ABHD11	ENSG00000106077	-0.710858	0.0179712	-0.73816	0.00421815
107	EPHB6	ENSG00000106123	-1.65484	0.0242485	-1.98039	1.03827e-09
108	CHCHD2	ENSG00000106153	-0.424693	0.00526066	-0.916459	5.49191e-07
109	NPTX2	ENSG00000106236	-12.8995	5.85388e-05	-7.4712	3.9746e-32
110	PTCD1	ENSG00000106246	-0.540006	0.000204502	-0.711673	0.00748962
111	EIF3B	ENSG00000106263	-0.585502	3.54168e-05	-1.2083	2.25427e-08
112	MOSPD3	ENSG00000106330	-0.545679	0.0138809	-0.974245	0.000341996
113	IMPDH1	ENSG00000106348	-1.13224	1.66231e-05	-1.95634	2.01475e-10
114	MEST	ENSG00000106484	-2.90363	0.0018105	-4.12687	9.57256e-68
115	POLD2	ENSG00000106628	-0.764019	3.08263e-07	-1.3558	4.52913e-06
116	EDF1	ENSG00000107223	-0.853203	0.0268484	-2.04928	3.01206e-05
117	UBE2S	ENSG00000108106	-0.996495	0.0106183	-1.71376	9.23211e-06
118	RPL28	ENSG00000108107	-0.80024	2.78484e-06	-1.61019	1.95649e-07
119	PPIF	ENSG00000108179	-0.578715	0.00629203	-0.822301	3.13517e-08
120	TSPAN14	ENSG00000108219	-1.1817	0.00483372	-1.50983	1.40419e-49
121	RPL19	ENSG00000108298	-0.861328	2.41668e-08	-1.54326	6.20562e-08
122	PFN1	ENSG00000108518	-0.732203	1.60535e-08	-1.50315	3.65632e-08
123	C1QBP	ENSG00000108561	-0.469513	0.00265284	-0.852302	1.44978e-08
124	YWHAE	ENSG00000108953	-0.387112	0.00403649	-0.827608	2.70067e-18
125	NHERF1	ENSG00000109062	-0.885372	0.000710055	-1.49055	2.23699e-08
126	RAB34	ENSG00000109113	-0.412391	0.0129819	-1.067	2.99216e-05
127	RPL34	ENSG00000109475	-0.95333	0.000874256	-1.61298	1.58447e-07
128	RPS13	ENSG00000110700	-0.663331	0.000204964	-1.22237	2.86837e-08
129	KRT18	ENSG00000111057	-0.824539	0.0390663	-1.78064	1.0784e-09
130	ARPC3	ENSG00000111229	-0.440299	0.0182396	-0.794843	3.80546e-05
131	ARHGDIB	ENSG00000111348	-3.16838	0.00529146	-2.17193	1.06847e-06
132	TPI1	ENSG00000111669	-0.310827	0.0411559	-0.966785	0.00157261
133	RWDD1	ENSG00000111832	-0.876856	0.0082571	-1.20731	7.33102e-10
134	TMEM14C	ENSG00000111843	-0.637398	0.000528653	-1.05244	2.09517e-13
135	HDDC2	ENSG00000111906	-0.751022	0.000643375	-1.19934	6.47802e-09
136	FANCE	ENSG00000112039	-3.61075	0.00560538	-1.81341	1.04923e-25
137	MRPL18	ENSG00000112110	-0.817999	0.000135332	-1.2203	6.12521e-15
138	RPS12	ENSG00000112306	-1.57418	4.80908e-20	-2.18346	2.42525e-17
139	SLC39A7	ENSG00000112473	-0.936155	0.00233497	-1.78316	1.21674e-13
140	BYSL	ENSG00000112578	-0.779216	0.00344219	-1.5822	2.20783e-21
141	PTK7	ENSG00000112655	-0.618837	0.00827383	-1.10841	1.17441e-18
142	DNPH1	ENSG00000112667	-0.846633	0.000244458	-1.50989	2.84558e-06
143	COX7A2	ENSG00000112695	-1.83995	0.00115046	-1.66668	6.67505e-14
144	GMDS	ENSG00000112699	-0.934654	0.0153818	-1.6809	4.58272e-18
145	DBN1	ENSG00000113758	-1.29847	3.35662e-07	-2.0286	5.47361e-20
146	PCCB	ENSG00000114054	-0.62295	0.0319121	-1.25825	1.00731e-11
147	GNAI2	ENSG00000114353	-0.729271	4.73948e-05	-1.44098	2.06523e-19
148	RPL24	ENSG00000114391	-1.44942	1.54759e-06	-2.32467	2.7122e-15
149	RRP9	ENSG00000114767	-0.875121	0.00177439	-1.70392	8.47223e-10
150	EEF1B2	ENSG00000114942	-0.761248	3.06606e-06	-1.28616	5.80215e-09
151	EEF1B2	ENSG00000114942	-0.617957	0.0303834	-1.28616	5.80215e-09
152	KCNIP3	ENSG00000115041	-0.825844	0.0133608	-1.23168	2.80218e-16
153	RPS15	ENSG00000115268	-0.899447	0.000427949	-1.67857	5.11842e-07
154	LOXL3	ENSG00000115318	-2.13157	0.00980678	-2.53805	6.39222e-65
155	ODC1	ENSG00000115758	-0.649752	0.000994022	-1.00283	2.23961e-12
156	MRPL37	ENSG00000116221	-0.394567	0.0102113	-1.05423	3.07917e-05
157	RPL22	ENSG00000116251	-0.565089	2.1915e-05	-0.672025	0.000599476
158	WDR77	ENSG00000116455	-0.526339	0.0159903	-1.04078	5.52155e-12
159	SRM	ENSG00000116649	-0.589972	0.00329055	-1.30738	6.71612e-06
160	MAD2L2	ENSG00000116670	-0.64539	0.0224435	-1.22693	0.000654613
161	EBNA1BP2	ENSG00000117395	-0.97934	0.0101602	-1.33264	6.69122e-13
162	RPS25	ENSG00000118181	-0.83805	0.00612209	-1.29208	7.89753e-07
163	RAB32	ENSG00000118508	-1.71649	2.724e-29	-2.29851	2.04176e-40
164	TCF21	ENSG00000118526	-2.32568	0.0412959	-2.34795	1.88923e-17
165	UCHL3	ENSG00000118939	-0.817659	0.00345534	-1.26854	8.78211e-08
166	PGF	ENSG00000119630	-1.17788	0.0215679	-1.8748	7.21287e-08
167	IFI27L2	ENSG00000119632	-0.780832	0.0328136	-1.6271	0.000565596
168	SLIRP	ENSG00000119705	-0.544611	0.0291959	-1.12446	0.000141304
169	MTHFD1L	ENSG00000120254	-0.730787	0.000677277	-1.2379	8.16206e-58
170	PCMT1	ENSG00000120265	-0.820184	0.0192442	-1.16055	7.51861e-11
171	ACAT2	ENSG00000120437	-1.42681	4.70259e-11	-1.69659	3.3617e-50
172	TCP1	ENSG00000120438	-0.976763	1.90667e-07	-1.22241	6.67394e-21
173	RPL21	ENSG00000122026	-0.918395	4.18565e-05	-1.56442	4.83383e-08
174	RPL5	ENSG00000122406	-0.715132	0.000707106	-1.20767	1.27501e-18
175	WFDC3	ENSG00000124116	-2.59669	0.00695208	-2.81189	0.00016529
176	SDC4	ENSG00000124145	-0.673356	0.0108936	-1.4871	2.32433e-22
177	XG	ENSG00000124343	-2.77781	0.00486191	-2.75313	1.80511e-27
178	RRP36	ENSG00000124541	-0.975791	1.20684e-09	-1.62088	7.87827e-13
179	SNRPC	ENSG00000124562	-1.05532	1.45968e-12	-1.68746	8.18791e-13
180	RPS10	ENSG00000124614	-1.67846	0.00402708	-2.58221	3.03904e-20
181	MEA1	ENSG00000124733	-0.818479	0.00332957	-1.45845	1.06081e-07
182	EMC3	ENSG00000125037	-0.439838	0.0455718	-1.15811	2.64282e-09
183	SH3TC1	ENSG00000125089	-9.86147	0.0145265	-2.67457	1.77633e-39
184	MT2A	ENSG00000125148	-0.939424	0.000152897	-1.56606	2.82965e-07
185	NT5C	ENSG00000125458	-0.617555	0.0102607	-1.25075	0.000153605
186	PPDPF	ENSG00000125534	-0.650639	0.0106762	-1.33345	3.55679e-05
187	RPL23	ENSG00000125691	-0.671896	0.000316391	-1.30412	2.42928e-11
188	SNRPD2	ENSG00000125743	-0.673961	0.0018959	-1.56132	1.09296e-06
189	VASP	ENSG00000125753	-1.01493	3.34241e-09	-1.71985	2.49489e-32
190	CENPB	ENSG00000125817	-0.418693	0.0442228	-1.16448	2.29973e-05
191	SNRPB	ENSG00000125835	-0.447367	0.0151243	-1.07705	2.87309e-05
192	NCLN	ENSG00000125912	-0.60055	0.0122723	-1.3611	1.18819e-05
193	TMEM115	ENSG00000126062	-0.589845	0.00232869	-1.42915	3.17755e-09
194	RBM42	ENSG00000126254	-0.415685	0.0336094	-1.17153	2.59032e-05
195	BCL2L12	ENSG00000126453	-1.10864	0.00105054	-1.63228	4.31019e-08
196	PRMT1	ENSG00000126457	-0.62365	0.000354872	-1.29566	8.4922e-11
197	MAP2K2	ENSG00000126934	-0.934197	0.00239177	-1.81872	1.52282e-05
198	PIN1	ENSG00000127445	-0.56889	0.0289003	-1.13869	0.00167227
199	ECHS1	ENSG00000127884	-0.517908	9.91892e-05	-1.43262	5.9734e-05
200	RAC2	ENSG00000128340	-2.54755	0.000543726	-2.94127	2.86628e-33
201	KRT17	ENSG00000128422	-2.29338	9.8341e-17	-3.26542	6.08621e-23
202	CPA4	ENSG00000128510	-4.06425	0.0440614	-3.05259	7.25383e-63
203	HOXD13	ENSG00000128714	-4.13448	2.28516e-06	-4.06548	4.04925e-35
204	PGAP6	ENSG00000129925	-0.452168	0.0175991	-0.807214	8.11279e-07
205	NECTIN2	ENSG00000130202	-0.606946	0.012945	-1.47688	4.08425e-07
206	TOMM40	ENSG00000130204	-0.601357	0.00246592	-1.15438	5.23487e-08
207	RPL36	ENSG00000130255	-0.890637	0.00151635	-2.04582	1.69255e-05
208	ARPC1B	ENSG00000130429	-0.510425	0.00110534	-0.706861	0.00204896
209	PXDN	ENSG00000130508	-0.88775	0.0255218	-1.92817	7.43502e-20
210	JUND	ENSG00000130522	-0.524767	0.0213731	-1.25757	7.43719e-09
211	CHMP2A	ENSG00000130724	-0.500922	0.0299917	-1.09896	0.000127406
212	TRIM28	ENSG00000130726	-0.509923	0.0133392	-1.10083	0.000105144
213	METTL26	ENSG00000130731	-0.61846	0.035143	-1.564	6.28623e-06
214	EIF3G	ENSG00000130811	-0.565591	0.0151243	-1.24254	0.00035699
215	ULBP2	ENSG00000131015	-2.69741	0.000517169	-2.6988	1.55576e-21
216	ZNF428	ENSG00000131116	-0.780567	0.0101002	-1.5932	2.47239e-06
217	COX4I1	ENSG00000131143	-0.529726	0.00829137	-1.18335	0.000179699
218	PDLIM4	ENSG00000131435	-0.878499	0.0101695	-1.98488	4.07538e-16
219	RPL27	ENSG00000131469	-0.826152	0.000188413	-1.44714	2.31106e-09
220	KHDRBS3	ENSG00000131773	-1.20822	0.000216755	-1.79171	3.55452e-36
221	SNRPA1	ENSG00000131876	-0.679328	0.00563366	-0.921736	3.98418e-13
222	LGALS3	ENSG00000131981	-0.354147	0.0346248	-0.506583	0.000388778
223	RAF1	ENSG00000132155	-0.686057	0.0266206	-1.07661	2.48591e-16
224	RAN	ENSG00000132341	-0.360651	0.00403649	-0.789001	1.89857e-12
225	SERPINF1	ENSG00000132386	-1.0227	0.042226	-1.48935	1.71787e-10
226	COQ3	ENSG00000132423	-1.94872	0.0083775	-1.88724	2.27752e-16
227	EIF5A	ENSG00000132507	-0.875757	8.0285e-15	-1.59115	1.9663e-10
228	FLOT2	ENSG00000132589	-1.14504	0.0011734	-1.5878	3.02014e-08
229	NES	ENSG00000132688	-1.94932	3.25292e-13	-2.57518	1.38071e-22
230	BEX1	ENSG00000133169	-4.66033	0.00800713	-2.67527	7.76596e-05
231	HSPBP1	ENSG00000133265	-1.04452	0.0125374	-1.54081	4.19044e-06
232	CAMK1	ENSG00000134072	-1.02135	0.00120458	-1.78531	1.89801e-14
233	RPS15A	ENSG00000134419	-0.823105	0.000798162	-1.39699	7.71131e-09
234	ECHDC3	ENSG00000134463	-4.43169	0.000355976	-3.06825	2.03567e-22
235	SPOCD1	ENSG00000134668	-1.31128	0.0239047	-1.94582	3.07889e-17
236	YARS1	ENSG00000134684	-0.35442	0.0329575	-0.837776	8.84197e-10
237	ATP5MC2	ENSG00000135390	-0.499966	0.00115197	-1.05672	0.000544127
238	HNRNPA1	ENSG00000135486	-1.53106	0.0235467	-0.782933	1.91844e-16
239	CCT7	ENSG00000135624	-0.442623	1.50609e-05	-1.06395	1.70478e-11
240	EIF4E2	ENSG00000135930	-0.508707	0.000515944	-1.08798	8.73413e-06
241	COX5B	ENSG00000135940	-0.704661	0.0029596	-1.48625	2.73028e-05
242	ANP32B	ENSG00000136938	-0.543181	0.00528276	-1.08828	4.71554e-07
243	RPL35	ENSG00000136942	-0.742379	0.00871141	-1.66343	1.55072e-05
244	RPS6	ENSG00000137154	-0.798044	6.97014e-08	-1.3676	8.67708e-10
245	CNPY3	ENSG00000137161	-0.566527	0.0344935	-1.39097	6.90957e-05
246	YIPF3	ENSG00000137207	-0.632104	5.42701e-06	-1.26044	1.19886e-12
247	TMEM14B	ENSG00000137210	-0.988818	6.70278e-09	-1.3381	3.92897e-23
248	TUBB2A	ENSG00000137267	-1.24996	1.47391e-07	-2.08173	3.42657e-45
249	TUBB2B	ENSG00000137285	-1.24996	1.47391e-07	-1.16807	0.00270518
250	UQCC2	ENSG00000137288	-1.17345	0.000314578	-2.14326	2.49315e-08
251	HMGA1	ENSG00000137309	-1.72852	1.08348e-23	-2.20586	4.06024e-18
252	FLOT1	ENSG00000137312	-0.988083	0.00113068	-1.47143	5.92388e-09
253	FLOT1	ENSG00000137312	-1.19443	0.033321	-1.47143	5.92388e-09
254	MTCH1	ENSG00000137409	-0.766847	2.46967e-11	-1.34453	4.14651e-23
255	RPLP1	ENSG00000137818	-0.401711	0.0321523	-1.0324	6.54214e-05
256	LOXL4	ENSG00000138131	-1.88393	5.16328e-06	-3.33389	1.9576e-90
257	DUSP5	ENSG00000138166	-0.571885	0.0314447	-0.887043	8.59536e-13
258	RPS24	ENSG00000138326	-0.904286	2.81096e-06	-1.55038	4.03681e-12
259	SEMA7A	ENSG00000138623	-2.58256	1.01686e-12	-3.20578	1.123e-173
260	SNRPF	ENSG00000139343	-0.464025	0.0414524	-0.885775	0.000638139
261	MMAB	ENSG00000139428	-1.05888	0.0122274	-1.94204	5.7367e-05
262	TARBP2	ENSG00000139546	-0.660797	0.0484977	-1.12551	9.28855e-05
263	GALNT6	ENSG00000139629	-4.86596	0.00608429	-3.86505	7.55959e-39
264	ANP32A	ENSG00000140350	-0.524467	0.0312536	-0.933136	6.14125e-08
265	TGFB1I1	ENSG00000140682	-0.778468	0.00569632	-1.36203	3.12168e-06
266	RHOT2	ENSG00000140983	-1.21807	0.0189023	-1.23069	0.000785258
267	RPS2	ENSG00000140988	-0.616713	2.98189e-22	-1.22121	1.79933e-06
268	RPS2	ENSG00000140988	-0.633452	9.17081e-13	-1.22121	1.79933e-06
269	RPS2	ENSG00000140988	-0.760766	0.000139311	-1.22121	1.79933e-06
270	TCF25	ENSG00000141002	-0.515076	0.0423253	-1.15227	7.36281e-05
271	P3H4	ENSG00000141696	-0.716675	0.0340629	-1.76316	2.05011e-13
272	COL6A1	ENSG00000142156	-13.3775	4.89826e-11	-0.65948	0.000233141
273	PSMB6	ENSG00000142507	-0.500613	0.00227568	-1.1743	1.98664e-05
274	RPS11	ENSG00000142534	-0.652426	0.00306048	-1.38707	7.00219e-07
275	RPL13A	ENSG00000142541	-0.97137	0.000342337	-1.40691	8.12997e-07
276	RPL13A	ENSG00000142541	-0.637855	0.00050768	-1.40691	8.12997e-07
277	NOSIP	ENSG00000142546	-0.987222	0.0186694	-1.91625	2.2211e-05
278	SH3BGRL3	ENSG00000142669	-0.570456	0.00184667	-1.1452	0.00102793
279	RPL11	ENSG00000142676	-0.782388	0.000176824	-1.47044	1.23591e-07
280	RPS8	ENSG00000142937	-0.847645	4.42721e-06	-1.48031	5.11863e-11
281	MRPL24	ENSG00000143314	-0.286538	0.0370312	-0.630136	0.0458845
282	GUK1	ENSG00000143774	-0.583211	0.014161	-1.22011	3.3213e-05
283	CNIH3	ENSG00000143786	-3.45333	0.0399895	-1.92719	1.34133e-27
284	RPS27A	ENSG00000143947	-0.901375	0.00178584	-1.74569	6.13388e-08
285	RPS27	ENSG00000143947	-0.554799	0.0489189	-1.74569	6.13388e-08
286	SLC20A1	ENSG00000144136	-0.586804	0.0436877	-1.2655	3.30952e-09
287	RPL32	ENSG00000144713	-1.37638	1.17559e-06	-2.36906	1.99663e-20
288	TMEM44	ENSG00000145014	-0.882277	0.035036	-1.56373	1.47456e-13
289	MANF	ENSG00000145050	-0.68654	0.0238824	-1.82335	4.30286e-08
290	SFRP2	ENSG00000145423	-2.05718	0.0224532	-0.771784	0.000718984
291	RPS3A	ENSG00000145425	-15.944	1.18758e-12	-1.40342	1.07381e-09
292	RPS3A	ENSG00000145425	-0.799764	7.71887e-05	-1.40342	1.07381e-09
293	RPS3A	ENSG00000145425	-0.798445	0.0318244	-1.40342	1.07381e-09
294	NDUFS6	ENSG00000145494	-0.798784	0.000896512	-1.66725	1.08654e-05
295	RPL37	ENSG00000145592	-3.06424	0.0175179	-1.38177	3.08397e-07
296	BTF3	ENSG00000145741	-0.444578	0.000710055	-0.993891	1.66371e-05
297	NHP2	ENSG00000145912	-0.769876	0.000106305	-1.62434	3.28419e-07
298	NFKBIE	ENSG00000146232	-2.16025	4.53911e-06	-3.31143	1.7443e-30
299	TPBG	ENSG00000146242	-0.785394	0.0133397	-1.10874	1.63626e-06
300	ABRACL	ENSG00000146386	-0.990301	0.00246592	-1.44404	6.67325e-13
301	DYNLT1	ENSG00000146425	-1.32131	1.80159e-05	-2.09689	2.13354e-20
302	MDH2	ENSG00000146701	-0.322461	0.0348978	-0.786266	0.000603273
303	TRIM55	ENSG00000147573	-9.85131	0.0110514	-3.86052	3.12711e-23
304	RPL7	ENSG00000147604	-0.685209	0.000342337	-1.44836	1.49458e-08
305	NDUFB9	ENSG00000147684	-0.531132	0.00484059	-1.08176	1.37892e-05
306	RPL7A	ENSG00000148303	-0.72852	0.000245967	-1.45407	2.86701e-10
307	RPL7A	ENSG00000148303	-0.782729	0.015265	-1.45407	2.86701e-10
308	PTGES2	ENSG00000148334	-0.691212	0.0063558	-1.35569	1.06594e-05
309	ADIRF	ENSG00000148671	-1.02638	0.00345799	-1.61638	0.000777819
310	FUOM	ENSG00000148803	-1.91011	4.36913e-07	-2.78467	3.27614e-13
311	RPS3	ENSG00000149273	-0.882105	3.98776e-05	-1.62543	1.35898e-08
312	TAGLN	ENSG00000149591	-0.955413	0.017505	-2.21661	4.1634e-15
313	COMMD7	ENSG00000149600	-0.413337	0.0192324	-0.913675	5.21609e-06
314	FAU	ENSG00000149806	-0.611796	0.00428308	-1.25745	3.56605e-07
315	PPP4C	ENSG00000149923	-0.705651	1.69343e-05	-1.33617	1.60861e-06
316	ALDOA	ENSG00000149925	-0.440387	0.00428178	-0.977785	0.000200834
317	TIMM8B	ENSG00000150779	-0.713072	0.0313489	-1.51126	7.37984e-12
318	UBC	ENSG00000150991	-0.899911	0.00521934	-0.572913	0.0199083
319	BEND6	ENSG00000151917	-2.92067	0.0265914	-1.12789	0.00152409
320	MZT2B	ENSG00000152082	-0.745806	0.00184	-1.56888	2.88382e-05
321	TEX29	ENSG00000153495	-1.80654	0.00880476	-1.79987	0.000353072
322	CMTM7	ENSG00000153551	-0.916423	0.000644805	-1.51232	5.49188e-09
323	CFDP1	ENSG00000153774	-0.540699	0.00562495	-1.06692	1.8416e-05
324	NRGN	ENSG00000154146	-13.373	4.15192e-14	-5.55375	2.04614e-26
325	MAGED4	ENSG00000154545	-1.36051	0.00406392	-4.2519	2.2048e-30
326	GTF3C6	ENSG00000155115	-1.18939	8.80836e-12	-1.67954	2.8361e-17
327	RHOC	ENSG00000155366	-0.552905	0.011799	-1.50961	1.77589e-06
328	DBI	ENSG00000155368	-0.646461	0.00564831	-0.879988	0.00019331
329	ATP5MJ	ENSG00000156411	-0.734811	0.000168624	-1.24922	1.62433e-06
330	RPL30	ENSG00000156482	-0.543991	0.0144397	-1.10553	2.77767e-08
331	EEF1A1	ENSG00000156508	-0.928373	2.9547e-10	-1.25669	5.55444e-28
332	SEC13	ENSG00000157020	-0.98268	1.10437e-05	-1.76268	3.94349e-31
333	SLC35B2	ENSG00000157593	-0.42483	0.0192324	-1.03463	1.83385e-10
334	MRPL17	ENSG00000158042	-0.581686	0.0158437	-1.31844	8.79708e-06
335	TAGLN2	ENSG00000158710	-0.672326	6.81243e-06	-1.46028	4.47833e-08
336	CDA	ENSG00000158825	-4.33861	0.00263331	-5.1265	1.20275e-28
337	CSRP1	ENSG00000159176	-1.42793	5.72979e-12	-2.18612	6.54085e-34
338	ATP5MC1	ENSG00000159199	-0.550712	0.00904033	-1.21933	0.000127725
339	PTMS	ENSG00000159335	-0.855951	0.00526305	-1.76071	1.9368e-05
340	CHCHD6	ENSG00000159685	-0.869105	0.0121382	-1.59675	7.34643e-08
341	ZYX	ENSG00000159840	-1.39664	1.2881e-06	-2.2227	3.17961e-15
342	U2AF1	ENSG00000160201	-0.523034	0.0137125	-0.855069	0.000121698
343	SPATC1L	ENSG00000160284	-1.0647	0.0373992	-1.31951	6.90055e-05
344	TOR2A	ENSG00000160404	-0.581738	0.044464	-1.12475	2.01097e-06
345	ZDHHC12	ENSG00000160446	-0.518319	0.00335829	-1.04034	8.10055e-05
346	FDPS	ENSG00000160752	-0.540906	0.00743465	-0.879503	4.40549e-08
347	LMNA	ENSG00000160789	-1.09099	0.0057307	-1.00758	0.000817957
348	CCDC12	ENSG00000160799	-0.990553	0.0104947	-2.11146	1.95844e-08
349	LY6K	ENSG00000160886	-0.960051	0.0336851	-1.18709	0.000430728
350	RPL8	ENSG00000161016	-0.830005	1.79328e-06	-1.62651	1.5953e-07
351	AP2M1	ENSG00000161203	-0.62213	0.0202548	-1.54332	5.40522e-13
352	ITGA5	ENSG00000161638	-1.06289	4.63083e-20	-1.56138	1.40881e-28
353	EIF4A1	ENSG00000161960	-0.464958	1.56634e-08	-1.00833	2.20708e-08
354	RPL26	ENSG00000161970	-0.779865	0.000673988	-1.38831	1.83272e-08
355	LBHD1	ENSG00000162194	-0.614243	0.00264484	-0.618435	0.0374037
356	RPL29	ENSG00000162244	-1.16447	3.37356e-05	-2.14671	2.30632e-17
357	RPL29	ENSG00000162244	-2.76619	0.0064774	-2.14671	2.30632e-17
358	FAAP20	ENSG00000162585	-0.674708	0.0355865	-1.4894	0.000488299
359	ACTG2	ENSG00000163017	-1.51065	1.19151e-06	-3.16034	1.26505e-51
360	CCT3	ENSG00000163468	-0.425105	0.000164148	-0.983736	3.29957e-13
361	RPL22L1	ENSG00000163584	-1.94229	1.01876e-06	-2.72314	1.57425e-27
362	THOC7	ENSG00000163634	-1.02731	1.4585e-05	-1.69066	1.02687e-18
363	PTX3	ENSG00000163661	-1.32289	0.000182314	-2.03104	1.4406e-19
364	RPL9	ENSG00000163682	-0.956145	0.000938681	-0.957463	4.58017e-09
365	IL17RE	ENSG00000163701	-10.176	0.0319121	-2.9514	3.14194e-24
366	IL17RC	ENSG00000163702	-1.22956	5.73749e-05	-1.45573	2.94532e-08
367	MTMR14	ENSG00000163719	-1.12201	5.74148e-06	-1.80188	9.86828e-24
368	CLEC3B	ENSG00000163815	-1.96879	1.71103e-06	-3.36268	1.48003e-20
369	H2AZ1	ENSG00000164032	-0.763213	0.00639639	-1.08666	2.98255e-09
370	NDUFAF2	ENSG00000164182	-0.512636	0.0484232	-0.895303	0.000652154
371	CSF2	ENSG00000164400	-4.64963	0.0171991	-4.27823	3.08867e-15
372	CITED2	ENSG00000164442	-0.857053	0.000558051	-1.18863	7.42572e-12
373	RPS14	ENSG00000164587	-0.804453	5.77283e-06	-1.60918	5.30315e-10
374	CARD19	ENSG00000165233	-0.363439	0.039002	-0.68456	0.00225245
375	PSMC3	ENSG00000165916	-0.580097	0.00261653	-1.29745	4.54995e-07
376	ILK	ENSG00000166333	-0.67796	2.64096e-07	-1.327	2.49323e-13
377	RPL27A	ENSG00000166441	-0.959738	5.76454e-06	-1.72378	2.35616e-08
378	MCM7	ENSG00000166508	-0.648594	0.03845	-1.31718	1.39566e-07
379	CENPV	ENSG00000166582	-3.57189	0.00597667	-2.46961	1.59776e-20
380	TSC22D4	ENSG00000166925	-0.643437	0.000779322	-1.12399	6.65999e-06
381	PHB1	ENSG00000167085	-0.500556	2.76056e-05	-1.03049	1.93297e-05
382	GPX4	ENSG00000167468	-0.757706	0.00526738	-1.70405	2.35497e-06
383	MVD	ENSG00000167508	-1.2043	0.00135204	-1.79051	0.000157178
384	RPL13	ENSG00000167526	-0.761329	0.00168788	-1.66182	9.72803e-06
385	TUBA1A	ENSG00000167552	-0.564636	2.67563e-06	-1.75883	3.08595e-16
386	TUBA1C	ENSG00000167553	-0.475139	1.60012e-06	-0.831922	5.99447e-17
387	AXL	ENSG00000167601	-0.709837	0.0067203	-1.20287	1.06396e-09
388	PSCA	ENSG00000167653	-3.47022	0.0285405	-1.63577	8.25456e-06
389	DAPK3	ENSG00000167657	-0.850766	0.014726	-1.8778	6.17333e-07
390	EEF2	ENSG00000167658	-0.387205	0.0302379	-1.00422	9.66172e-13
391	UBXN6	ENSG00000167671	-0.585915	0.00712338	-1.30135	3.67484e-07
392	NDUFV1	ENSG00000167792	-1.0885	0.00637179	-1.60793	0.000223619
393	FAM234A	ENSG00000167930	-0.544161	0.0492125	-1.48971	5.48372e-07
394	FTH1	ENSG00000167996	-0.481306	0.0153524	-0.97878	3.03917e-05
395	RPSA	ENSG00000168028	-1.43608	2.2866e-06	-2.55267	4.62027e-16
396	COPS6	ENSG00000168090	-0.393332	0.0116042	-0.963235	0.000120011
397	NT5DC2	ENSG00000168268	-1.37712	0.0002365	-2.34833	1.67052e-21
398	STIP1	ENSG00000168439	-0.532762	0.000199898	-1.07548	8.19568e-10
399	SERINC2	ENSG00000168528	-0.993806	0.00050768	-1.171	1.51713e-07
400	NDUFS5	ENSG00000168653	-0.806819	0.000809709	-1.84594	3.98398e-06
401	TSPAN5	ENSG00000168785	-0.563812	0.0199727	-1.02287	4.06024e-18
402	PRELID1	ENSG00000169230	-0.659764	3.1188e-07	-1.42588	1.26065e-10
403	DCXR	ENSG00000169738	-0.911673	0.0106762	-1.56257	0.000121327
404	SF3B5	ENSG00000169976	-1.46593	1.9315e-08	-2.3214	6.04514e-10
405	HOXD12	ENSG00000170178	-5.4509	0.0223924	-4.844	4.26747e-43
406	TMT1B	ENSG00000170439	-6.69973	0.00999334	-4.75964	5.65864e-12
407	HARS1	ENSG00000170445	-3.93162	0.0104666	-0.636904	5.11909e-05
408	KISS1	ENSG00000170498	-1.15103	0.0269082	-1.37326	0.000650006
409	PA2G4	ENSG00000170515	-0.360072	0.0266509	-0.821997	7.2807e-08
410	SMAGP	ENSG00000170545	-0.588753	0.00756423	-1.1158	2.90786e-11
411	LSM3	ENSG00000170860	-0.921786	0.0198968	-1.48081	2.31226e-08
412	RPS9	ENSG00000170889	-1.10698	6.41243e-05	-1.96644	8.87075e-06
413	JAGN1	ENSG00000171135	-0.750342	0.000815509	-1.44335	9.45702e-13
414	KRT19	ENSG00000171345	-2.74304	6.69733e-21	-3.48471	2.74455e-23
415	VAT1L	ENSG00000171724	-11.134	0.0178354	-4.27458	7.3606e-50
416	RPS21	ENSG00000171858	-0.934422	0.000813533	-1.87845	8.06828e-09
417	RPS7	ENSG00000171863	-1.16419	7.58481e-10	-1.6796	1.17795e-15
418	QARS1	ENSG00000172053	-0.749048	0.0002801	-1.36997	1.5817e-21
419	GNB2	ENSG00000172354	-0.418193	0.00999954	-1.16531	0.000271998
420	PPP1CA	ENSG00000172531	-0.793427	3.14143e-11	-1.43144	1.93985e-09
421	MRPL52	ENSG00000172590	-0.702229	0.00194013	-1.35044	7.23406e-05
422	CORO1B	ENSG00000172725	-0.424987	0.0386552	-0.90982	1.94026e-06
423	RPL38	ENSG00000172809	-0.957878	3.54475e-05	-1.82732	6.62468e-10
424	COMMD1	ENSG00000173163	-0.538789	0.0301073	-1.36856	5.35533e-06
425	GLRX	ENSG00000173221	-1.177	6.84703e-06	-1.70683	1.15428e-36
426	MZT2A	ENSG00000173272	-0.843297	0.000644805	-1.60725	6.50033e-05
427	MAP3K11	ENSG00000173327	-0.671521	0.0495203	-1.37917	6.4549e-06
428	PPP1R14B	ENSG00000173457	-0.543744	0.00213074	-1.20821	0.0003166
429	UQCRH	ENSG00000173660	-0.450455	0.00148799	-0.926817	8.4414e-07
430	JUP	ENSG00000173801	-5.09829	0.0290325	-2.86225	7.41044e-33
431	HOXB2	ENSG00000173917	-9.95891	0.0193638	-5.28203	8.98188e-11
432	RPL4	ENSG00000174444	-0.744922	0.000100056	-1.4828	3.30198e-25
433	RPL4	ENSG00000174444	-1.0787	0.00817971	-1.4828	3.30198e-25
434	BRMS1	ENSG00000174744	-0.703258	0.0270475	-1.51534	0.00022418
435	RPL15	ENSG00000174748	-1.32143	0.00474239	-1.63409	4.12075e-39
436	RPL15	ENSG00000174748	-0.916692	0.0157541	-1.63409	4.12075e-39
437	NDUFA11	ENSG00000174886	-0.794415	0.00137084	-1.61327	1.68917e-05
438	RAB1B	ENSG00000174903	-0.2858	0.0144397	-0.863129	1.53773e-06
439	PSMD2	ENSG00000175166	-0.637622	0.000864953	-1.4156	1.15148e-28
440	RPS6KB2	ENSG00000175634	-0.66945	0.00553512	-1.50401	7.96801e-05
441	AURKAIP1	ENSG00000175756	-0.693519	0.011734	-1.63008	9.04532e-05
442	RUVBL1	ENSG00000175792	-0.766893	0.00166548	-1.50503	1.26207e-18
443	ETV4	ENSG00000175832	-1.51584	0.00406307	-2.30641	1.03907e-15
444	SPHK1	ENSG00000176170	-1.31722	0.00112977	-2.59888	4.93173e-10
445	LMNB2	ENSG00000176619	-0.165235	0.0089024	-0.568308	1.85817e-10
446	PXMP2	ENSG00000176894	-1.49005	0.00100275	-1.92819	1.11685e-10
447	HIC1	ENSG00000177374	-0.778261	0.0492532	-1.55622	1.64004e-14
448	CAVIN1	ENSG00000177469	-0.587622	0.011524	-1.48832	5.23614e-07
449	RABEP2	ENSG00000177548	-0.999096	0.0318615	-1.84598	1.5811e-06
450	RPLP2	ENSG00000177600	-1.01249	0.000859695	-1.84335	2.73916e-05
451	FAM20C	ENSG00000177706	-3.07185	0.0429213	-1.41244	3.46627e-06
452	IMPDH2	ENSG00000178035	-0.530647	0.029156	-1.31966	5.72085e-10
453	NDUFAF3	ENSG00000178057	-0.803004	0.0118512	-1.7078	1.12501e-12
454	CTXN1	ENSG00000178531	-1.00045	0.000150422	-1.93637	1.2911e-07
455	GTPBP6	ENSG00000178605	-1.08886	0.0423352	-1.14334	4.55912e-06
456	TUFM	ENSG00000178952	-0.326597	0.0101398	-0.810982	0.000859733
457	CYC1	ENSG00000179091	-0.53782	0.00050768	-1.04301	2.97305e-06
458	FARSA	ENSG00000179115	-0.360773	0.0292642	-0.968007	6.46324e-06
459	CALR	ENSG00000179218	-0.700604	7.64586e-09	-1.41064	4.67113e-16
460	GATA2	ENSG00000179348	-3.60733	0.0112705	-3.3244	7.82709e-67
461	PUF60	ENSG00000179950	-0.690447	0.00101591	-1.42641	0.000175811
462	HCLS1	ENSG00000180353	-11.8736	7.24132e-05	-4.64289	1.83047e-38
463	PSMG4	ENSG00000180822	-1.11925	1.28561e-06	-1.57428	3.15654e-15
464	MRPL14	ENSG00000180992	-1.27444	2.44148e-07	-2.10343	1.20755e-16
465	PHLDA2	ENSG00000181649	-0.623639	5.74635e-05	-1.22222	9.59754e-06
466	DEXI	ENSG00000182108	-0.319763	0.0429057	-0.878391	3.77148e-05
467	ANXA2	ENSG00000182718	-0.666985	1.47334e-05	-1.20697	1.47132e-15
468	RPS17	ENSG00000182774	-0.902089	8.68945e-05	-1.66237	6.02169e-07
469	RPL35A	ENSG00000182899	-1.18897	0.000699268	-2.10203	3.86743e-19
470	GAS6	ENSG00000183087	-1.09337	1.12737e-05	-1.93581	4.52872e-28
471	BEGAIN	ENSG00000183092	-4.89631	0.0107853	-2.48026	5.21224e-26
472	RUVBL2	ENSG00000183207	-0.894893	0.00171517	-1.57742	5.08786e-07
473	MRPL54	ENSG00000183617	-0.743549	0.0355865	-1.78937	1.44534e-05
474	ALYREF	ENSG00000183684	-0.490989	0.0121956	-1.14679	3.20976e-07
475	ZNF703	ENSG00000183779	-1.1705	0.000249047	-2.21899	3.84371e-18
476	NPW	ENSG00000183971	-2.33886	0.0112537	-4.39149	3.97182e-16
477	ACTG1	ENSG00000184009	-0.96861	4.59539e-07	-1.61295	4.16843e-50
478	ACTG1	ENSG00000184009	-1.60653	0.0235136	-1.61295	4.16843e-50
479	OAF	ENSG00000184232	-0.793837	1.25848e-05	-1.16087	4.06481e-07
480	SEPTIN9	ENSG00000184640	-0.550633	0.000568461	-1.11514	2.00784e-13
481	PTRHD1	ENSG00000184924	-0.856791	0.00564283	-1.51844	1.30152e-09
482	UBALD2	ENSG00000185262	-0.769771	0.0129986	-1.55172	9.32996e-07
483	PSMD13	ENSG00000185627	-0.613446	0.0407125	-1.35175	0.000590576
484	PCYT2	ENSG00000185813	-0.611843	0.0170317	-1.17915	3.04677e-05
485	RPS23	ENSG00000186468	-0.654361	0.0355586	-1.35719	4.42078e-09
486	SMIM29	ENSG00000186577	-0.533215	0.00862778	-0.981456	5.91735e-05
487	MAGED4B	ENSG00000187243	-1.36051	0.00406392	-4.18406	5.23531e-38
488	PLSCR3	ENSG00000187838	-0.484294	0.0114344	-1.06348	3.89166e-06
489	S100A16	ENSG00000188643	-1.22615	1.74475e-06	-2.25881	1.77741e-20
490	RPL14	ENSG00000188846	-1.08499	0.00262692	-1.9615	8.95735e-30
491	NOC2L	ENSG00000188976	-0.757317	0.00372313	-1.32264	3.42696e-06
492	PLAC9	ENSG00000189129	-10.6966	0.00171026	-2.39767	7.61719e-06
493	PLAC9	ENSG00000189129	-1.3094	0.0183259	-2.39767	7.61719e-06
494	TUBB	ENSG00000196230	-1.11363	7.14851e-16	-1.64558	4.48363e-30
495	TUBB	ENSG00000196230	-0.447802	8.60513e-06	-1.64558	4.48363e-30
496	PPIA	ENSG00000196262	-2.67922	0.0119467	-0.783675	0.00181029
497	MYL6B	ENSG00000196465	-1.29885	0.000288875	-1.17571	0.00308883
498	TOMM7	ENSG00000196683	-0.54308	0.0382189	-1.14434	0.000308364
499	PDLIM7	ENSG00000196923	-0.887568	0.00211932	-1.92927	3.89595e-13
500	MRPL21	ENSG00000197345	-0.663522	0.0362377	-1.17494	6.66115e-06
501	ZNF628	ENSG00000197483	-1.52432	0.0120709	-1.04547	0.00230697
502	ENTPD6	ENSG00000197586	-0.908304	0.0228599	-1.04507	1.04388e-06
503	RPS26	ENSG00000197728	-0.803212	8.49413e-06	-1.39506	7.76165e-05
504	RPL37A	ENSG00000197756	-0.860806	9.03207e-05	-1.55011	1.69204e-08
505	S100A6	ENSG00000197956	-1.15813	8.02814e-10	-1.60754	3.40553e-07
506	RPL12	ENSG00000197958	-0.621682	0.0148785	-1.1156	2.36268e-05
507	RPL23A	ENSG00000198242	-0.583865	0.000280212	-1.3906	3.44045e-05
508	ECI2	ENSG00000198721	-0.715465	6.80983e-06	-1.23915	2.40602e-19
509	MSRB1	ENSG00000198736	-0.863635	0.00565215	-1.32672	2.30884e-09
510	RPL10A	ENSG00000198755	-1.04645	3.8992e-08	-1.97499	2.98871e-12
511	SFT2D1	ENSG00000198818	-0.745022	0.00193257	-0.879651	1.51632e-05
512	APRT	ENSG00000198931	-0.694744	9.72509e-05	-1.31027	1.07251e-05
513	CCDC167	ENSG00000198937	-1.44024	0.000430083	-2.66236	4.43463e-10
514	CENPW	ENSG00000203760	-1.46047	5.23955e-05	-2.24013	2.94639e-16
515	DAXX	ENSG00000204209	-0.701586	0.0379854	-1.20711	1.52474e-13
516	PFDN6	ENSG00000204220	-1.56754	0.00167327	-1.70583	7.53485e-11
517	RING1	ENSG00000204227	-1.2295	0.0319122	-1.79979	4.22527e-12
518	WHR1	ENSG00000204344	-1.86878	0.018271	-1.64336	3.16918e-06
519	NELFE	ENSG00000204356	-1.53892	0.000437032	-1.91809	3.54813e-13
520	LSM2	ENSG00000204392	-0.848141	0.0198248	-1.45372	5.55995e-08
521	VARS1	ENSG00000204394	-1.56894	0.0180578	-1.62841	1.75761e-21
522	PRRC2A	ENSG00000204469	-1.78028	0.0256453	-1.45102	1.46881e-12
523	RACK1	ENSG00000204628	-0.778421	4.15382e-12	-1.39041	1.74233e-08
524	AKT1S1	ENSG00000204673	-0.59936	0.0240393	-0.940902	0.00124954
525	TMSB4X	ENSG00000205542	-0.630569	0.00493925	-1.61971	1.01715e-16
526	HBA1	ENSG00000206172	-4.70824	0.00010145	-7.04103	1.90712e-08
527	CLIC1	ENSG00000213719	-1.04341	3.96739e-12	-1.61345	1.34932e-22
528	MRPL23	ENSG00000214026	-1.2475	0.00794143	-2.29407	5.05546e-06
529	LYRM4	ENSG00000214113	-1.01452	0.000755639	-1.97035	4.78936e-12
530	FIS1	ENSG00000214253	-1.03634	0.00935526	-2.13198	6.79999e-06
531	PHB2	ENSG00000215021	-0.372256	0.00197362	-0.891171	2.82564e-05
532	MCRIP1	ENSG00000225663	-1.1228	0.0232028	-2.19572	3.51066e-05
533	NOL7	ENSG00000225921	-0.837812	0.00486902	-1.41029	6.719e-15
534	WDR46	ENSG00000227057	-1.24003	0.0199525	-1.93284	4.2227e-08
535	RPS18	ENSG00000231500	-1.31667	9.17081e-13	-1.89973	1.02663e-20
536	ANXA2P2	ENSG00000231991	-0.513462	0.0110514	-1.12575	0.0410311
537	GPX1	ENSG00000233276	-0.555089	0.0141707	-1.16592	5.22062e-05
538	RPS28	ENSG00000233927	-1.03339	0.000243548	-1.97711	2.73658e-06
539	TXNDC5	ENSG00000239264	-0.713563	0.000339569	-1.25664	3.69169e-24
540	LY6G5B	ENSG00000240053	-1.44307	1.01876e-06	-1.58262	3.7079e-08
541	RPL36A	ENSG00000241343	-0.802059	0.00149029	-1.50368	1.39546e-05
542	RPP21	ENSG00000241370	-1.48289	0.0343545	-1.44174	7.20186e-07
543	INMT	ENSG00000241644	-5.24254	1.51015e-06	-4.41746	1.18939e-32
544	ARPC1A	ENSG00000241685	-0.460906	0.000840692	-0.799041	2.26786e-11
545	MTFP1	ENSG00000242114	-1.56391	0.0178035	-2.22475	2.45983e-10
546	MRPL20	ENSG00000242485	-0.605825	0.00344219	-1.22751	0.000283259
547	NME2	ENSG00000243678	-0.625275	0.00105782	-1.46274	1.22239e-07
548	TWF2	ENSG00000247596	-0.815988	0.000943338	-1.60799	2.27545e-15
549	TMEM158	ENSG00000249992	-1.20317	1.50703e-05	-1.91811	2.59726e-29
550	FOXD1	ENSG00000251493	-2.87362	1.22237e-05	-3.37303	1.37095e-39
551	EIF5AL1	ENSG00000253626	-0.867787	0.000717328	-1.85999	0.0125284
552	EEF1G	ENSG00000254772	-0.862314	0.00226405	-1.41291	3.16654e-09
553	BRK1	ENSG00000254999	-0.545301	0.0076521	-1.21669	1.22082e-05
554	RTEL1	ENSG00000258366	-1.13703	0.0343545	-1.30394	0.000862364
555	BOP1	ENSG00000261236	-0.913571	0.00598345	-1.82698	2.30215e-06
556	CORO7	ENSG00000262246	-1.15385	0.0228081	-1.23889	5.82031e-07
557	MRPL12	ENSG00000262814	-0.990425	0.00505127	-1.89159	5.87745e-05
558	RPL17	ENSG00000265681	-0.818626	0.000399405	-1.42082	7.6489e-15
559	GTF2H5	ENSG00000272047	-0.889294	0.0348342	-1.53727	8.63104e-14
560	NUDT3	ENSG00000272325	-1.50391	3.05009e-11	-0.888295	0.0102665
561	TRBV12-4	ENSG00000276953	-4.3532	0.0161841	-1.9942	6.30125e-09
