# Supplementary material
Source: publisher site journal article supplement (doi:10.18632/aging.206371)
Supplement: Supplementary file 4 [file aging-v18i1-206371-supplementary-material-SD6.pdf]

**Supplementary Table 6. Expression summary of canonical senescence markers (*CDKN2A*, *CDKN1A*, and *LMNB1*) across two analytical pipelines.**

| Gene   | Alias    | Pipeline     | Comparison | Metric   | Group 1 | Group 2 | log2FC | padj     |
|--------|----------|--------------|------------|----------|---------|---------|--------|----------|
| CDKN2A | p16      | Portable     | Y vs. M    | avg RPKM | NA      | NA      | NA     | NA       |
| CDKN2A | p16      | Portable     | M vs. O    | avg RPKM | NA      | NA      | NA     | NA       |
| CDKN2A | p16      | Portable     | Y vs. O    | avg RPKM | NA      | NA      | NA     | NA       |
| CDKN2A | p16      | Command-line | Y vs. M    | baseMean | —       | —       | NA     | NA       |
| CDKN2A | p16      | Command-line | M vs. O    | baseMean | —       | —       | -1.28  | 1.10E-10 |
| CDKN2A | p16      | Command-line | Y vs. O    | baseMean | —       | —       | -1.01  | 6.82E-07 |
| CDKN1A | p21      | Portable     | Y vs. M    | avg RPKM | NA      | NA      | NA     | NA       |
| CDKN1A | p21      | Portable     | M vs. O    | avg RPKM | 346.60  | 263.24  | -0.40  | 2.47E-03 |
| CDKN1A | p21      | Portable     | Y vs. O    | avg RPKM | NA      | NA      | NA     | NA       |
| CDKN1A | p21      | Command-line | Y vs. M    | baseMean | —       | —       | NA     | NA       |
| CDKN1A | p21      | Command-line | M vs. O    | baseMean | —       | —       | -0.83  | 7.13E-06 |
| CDKN1A | p21      | Command-line | Y vs. O    | baseMean | —       | —       | -0.61  | 1.27E-03 |
| LMNB1  | Lamin B1 | Portable     | Y vs. M    | avg RPKM | NA      | NA      | NA     | NA       |
| LMNB1  | Lamin B1 | Portable     | M vs. O    | avg RPKM | NA      | NA      | NA     | NA       |
| LMNB1  | Lamin B1 | Portable     | Y vs. O    | avg RPKM | NA      | NA      | NA     | NA       |
| LMNB1  | Lamin B1 | Command-line | Y vs. M    | baseMean | —       | —       | -1.28  | 3.46E-05 |
| LMNB1  | Lamin B1 | Command-line | M vs. O    | baseMean | —       | —       | NA     | NA       |
| LMNB1  | Lamin B1 | Command-line | Y vs. O    | baseMean | —       | —       | -0.79  | 8.41E-03 |

Differential expression summary for *CDKN2A*, *CDKN1A*, and *LMNB1* were extracted from the DEG lists in Supplementary Table 3 (Portable Pipeline) and Supplementary Table 4 (Command-line), covering all pairwise comparisons (Y vs. M, M vs. O, Y vs. O).

Comparison represents group contrasts: young–middle, middle–old, and young–old.

Metric differs by pipeline: avg RPKM (Portable Pipeline) and baseMean (Command-line).

Group 1/Group 2 values are shown only for Portable comparisons with padj < 0.05; for Command-line results, these fields are denoted with “—”.

NA indicates non-significant results (padj ≥ 0.05).
