# Supplementary material
Source: publisher site journal article supplement (doi:10.18632/aging.206371)
Supplement: Supplementary file 6 [file aging-v18i1-206371-supplementary-material-SD8.pdf]

**Supplementary Table 8. Statistical validation of representative genes in Figure 7.**

| Gene    | ANOVA p | Comparison (Tukey) | Mean diff | 95% CI    |          | p-adj  | Sig. | Cohen's d | Effect size label | DetectRate (Y/M/O) |
|---------|---------|--------------------|-----------|-----------|----------|--------|------|-----------|-------------------|--------------------|
|         |         |                    |           | lower     | upper    |        |      |           |                   |                    |
| IFIT1   | 0.00025 | young → middle     | +107.29   | -1340.42  | 1554.99  | 0.9    | –    | 1.048     | large             | 1 / 1 / 1          |
|         |         | middle → old       | +2509.86  | 1062.15   | 3957.56  | 0.001  | ✓    | 1.931     | large             |                    |
|         |         | young → old        | +2617.14  | 1169.44   | 4064.85  | 0.001  | ✓    | 2.019     | large             |                    |
| MX1     | 0.00032 | young → middle     | +386.29   | -4045.94  | 4818.51  | 0.9    | –    | 0.925     | large             | 1 / 1 / 1          |
|         |         | middle → old       | +7465.43  | 3033.21   | 11897.65 | 0.0012 | ✓    | 1.876     | large             |                    |
|         |         | young → old        | +7851.71  | 3419.49   | 12283.94 | 0.001  | ✓    | 1.983     | large             |                    |
| OAS1    | 0.00023 | young → middle     | +22.86    | -977.66   | 1023.37  | 0.9    | –    | 0.77      | medium            | 0.43 / 1 / 1       |
|         |         | middle → old       | +1775.43  | 774.91    | 2775.95  | 0.001  | ✓    | 1.976     | large             |                    |
|         |         | young → old        | +1798.29  | 797.77    | 2798.80  | 0.001  | ✓    | 2.002     | large             |                    |
| EIF3CL  | 0.33571 | young → middle     | -46.00    | -425.18   | 333.18   | 0.9    | –    | -0.14     | negligible        | 1 / 1 / 1          |
|         |         | middle → old       | -169.00   | -548.18   | 210.18   | 0.5055 | –    | -0.56     | medium            |                    |
|         |         | young → old        | -215.00   | -594.18   | 164.18   | 0.3396 | –    | -1.195    | large             |                    |
| EEF1D   | 0.34302 | young → middle     | +219.57   | -3765.34  | 4204.49  | 0.9    | –    | 0.062     | negligible        | 1 / 1 / 1          |
|         |         | middle → old       | -2140.00  | -6124.92  | 1844.92  | 0.3778 | –    | -0.628    | medium            |                    |
|         |         | young → old        | -1920.43  | -5905.34  | 2064.49  | 0.4534 | –    | -1.581    | large             |                    |
| RPLP2   | 0.20102 | young → middle     | +174.71   | -7085.63  | 7435.06  | 0.9    | –    | 0.027     | negligible        | 1 / 1 / 1          |
|         |         | middle → old       | -4703.86  | -11964.20 | 2556.49  | 0.2501 | –    | -0.776    | medium            |                    |
|         |         | young → old        | -4529.14  | -11789.49 | 2731.20  | 0.2748 | –    | -1.727    | large             |                    |
| MMP9    | 0.06970 | young → middle     | +10.43    | -4.84     | 25.69    | 0.2171 | –    | 0.762     | medium            | 0.86 / 0.86 /      |
|         |         | middle → old       | -14.43    | -29.69    | 0.84     | 0.0658 | –    | -1.08     | large             | 0.57               |
|         |         | young → old        | -4.00     | -19.27    | 11.27    | 0.771  | –    | -1.265    | large             |                    |
| SULF1   | 0.30319 | young → middle     | +1529.43  | -959.71   | 4018.57  | 0.2849 | –    | 0.748     | medium            | 1 / 1 / 1          |
|         |         | middle → old       | -504.29   | -2993.42  | 1984.85  | 0.857  | –    | -0.226    | small             |                    |
|         |         | young → old        | +1025.14  | -1464.00  | 3514.28  | 0.5544 | –    | 1.133     | large             |                    |
| PCDHGB2 | 0.03584 | young → middle     | +33.71    | -1.21     | 68.63    | 0.0595 | –    | 1.088     | large             | 0.86 / 1 / 1       |
|         |         | middle → old       | -33.57    | -68.49    | 1.35     | 0.0607 | –    | -1.163    | large             |                    |
|         |         | young → old        | +0.14     | -34.78    | 35.06    | 0.9    | –    | 0.011     | negligible        |                    |

Mean differences are reported according to the arrow notation used in the main text (young→middle = middle–young; middle→old = old–middle; young→old = old–young). Tukey honest significant difference pairwise comparisons, adjusted p-values (padj), Cohen's d effect sizes, and detect rates are provided.
